# Supplementary material for: Aminals as powerful XAT-reagents: activation of fluorinated alkyl chlorides
Source: PubMed Central journal article supplement — Chem Sci. 2023 Feb 21;14(12):3229–34. doi: 10.1039/d3sc00027c (PMC10034144; doi:10.1039/d3sc00027c), 2023-02-21

# Supporting Information

## Aminals as powerful XAT-reagents: activation of fluorinated alkyl chlorides

Vladislav S. Kostromitin,<sup>a,b</sup> Artem O. Sorokin,<sup>a,b</sup> Vitalij, V. Levin,<sup>a</sup> Alexander D. Dilman<sup>a,\*</sup>

<sup>a</sup>*N. D. Zelinsky Institute of Organic Chemistry, 119991 Moscow, Leninsky prosp. 47, Russian Federation*

<sup>b</sup>*Lomonosov Moscow State University, Department of Chemistry, 119991 Moscow, Leninskie Gory 1-3, Russian Federation*

*E-mail: adil25@mail.ru*

## Table of Contents

|                                                | Page     |
|------------------------------------------------|----------|
| General methods                                | S2       |
| Starting materials                             | S2       |
| Triazinane <b>N1</b>                           | S3       |
| Hydrofluoroalkylation of alkenes with Freon-12 | S3       |
| Compounds <b>3a-n</b>                          | S3-S7    |
| Fluoroalkylation of alkenes                    | S7       |
| Compounds <b>4a-t, 5a-f</b>                    | S7-S15   |
| Gram-scale synthesis of <b>3a</b>              | S15      |
| Gram-scale synthesis of <b>5a</b>              | S16      |
| Synthesis of compounds <b>6</b> and <b>7</b>   | S16      |
| Synthesis of compounds <b>5g</b> and <b>10</b> | S17      |
| Radical clock experiment                       | S18      |
| Isolation of iminium salt                      | S18      |
| Stern-Volmer study                             | S19      |
| Quantum yield measurement                      | S19      |
| Quantum chemical calculations                  | S20-S42  |
| References                                     | S42-S43  |
| NMR spectra                                    | S44-S182 |

## General methods

All reactions were performed under an argon atmosphere. Acetonitrile was distilled from CaH<sub>2</sub> and stored over MS 3Å. Column chromatography was carried out employing silica gel (230–400 mesh). Precoated silica gel plates F-254 were used for thin-layer analytical chromatography visualizing with UV and/or acidic aq. KMnO<sub>4</sub> solution. High resolution mass-spectra (HRMS) were measured using electrospray ionization (ESI) and a time-of-flight (TOF) mass analyzer (Bruker MicroTOF II). The measurements were done in a positive-ion mode (interface capillary voltage –4500 V) or in a negative-ion mode (3200 V); the mass ranged from m/z 50 to m/z 3000. Photo-induced reactions were performed in Duran culture tubes (Roth cat. no K248.1, outside diameter = 12 mm). For irradiation, a strip of 455 nm light-emitting diodes (SMD 2835–120 LED 1 M Blue, 12 V, 24 W/m; 50 cm strip length) or 455 nm COB LED matrix Hontiey (29–32V, 3000mA, 100W; operated at 30W) were used. The distance between the reaction vessel and diodes was about 5 mm. The reaction tube was placed in a glass jacket and cooled with water at room temperature. The reaction setup was used as previously described.<sup>1</sup>

## Starting materials

All commercially available reagents were purchased from Acros Organics, ABCR or P&M Invest. Alkenes were distilled prior to use. Reagents shown below were synthesized according to literature procedures:

|                                                                                       |                                                                                       |                                                                                       |                                                                                       |
|---------------------------------------------------------------------------------------|---------------------------------------------------------------------------------------|---------------------------------------------------------------------------------------|---------------------------------------------------------------------------------------|
| 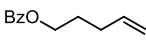     |      |     |    |
| <b>1b<sup>2</sup></b>                                                                 | <b>1c<sup>3</sup></b>                                                                 | <b>1d<sup>4</sup></b>                                                                 | <b>1e<sup>5</sup></b>                                                                 |
|    |    |  |                                                                                       |
| <b>1f<sup>6</sup></b>                                                                 | <b>1g<sup>7</sup></b>                                                                 | <b>1h<sup>8</sup></b>                                                                 |                                                                                       |
|    |    |  |                                                                                       |
| <b>1i<sup>9</sup></b>                                                                 | <b>1j<sup>10</sup></b>                                                                | <b>1k<sup>11</sup></b>                                                                |                                                                                       |
|    |    |   |  |
| <b>1l<sup>11</sup></b>                                                                | <b>1m<sup>12</sup></b>                                                                | <b>1n<sup>13</sup></b>                                                                | <b>1o<sup>14</sup></b>                                                                |
|    |    |    |   |
| <b>1p<sup>15</sup></b>                                                                | <b>1q<sup>16</sup></b>                                                                | <b>1r<sup>17</sup></b>                                                                | <b>1s<sup>18</sup></b>                                                                |
|  |    |    |    |
| <b>1t<sup>19</sup></b>                                                                | <b>1u<sup>20</sup></b>                                                                | <b>1v<sup>21</sup></b>                                                                | <b>1w<sup>22</sup></b>                                                                |
|   |  |   |                                                                                       |
| <b>1x<sup>23</sup></b>                                                                | <b>1y<sup>24</sup></b>                                                                | <b>4CzIPN<sup>27</sup></b>                                                            |                                                                                       |
|    |    |                                                                                       |                                                                                       |
| <b>2b<sup>25</sup></b>                                                                | <b>1z<sup>26</sup></b>                                                                |                                                                                       |                                                                                       |

**1,3,5-Trimethyl-1,3,5-triazinane (N1).**<sup>28</sup>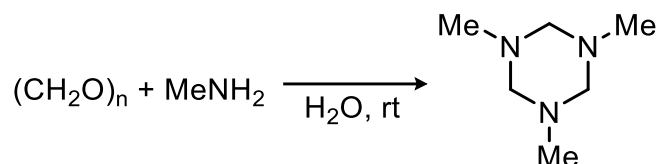

In a round-bottom flask, methylamine (380 mL of 38% aqueous solution, 3.49 mol) and acetic acid (0.1 mL) were added. Then, paraform (104.6 g, 3.49 mol) was added partially at such a rate to maintain internal temperature below 35 °C. The mixture was stirred overnight at room temperature, then it was diluted with methyl *tert*-butyl ether (150 mL). Solid sodium hydroxide (100 g) was gradually added with vigorous stirring. The organic layer was separated, and the aqueous phase was extracted with methyl *tert*-butyl ether (3×70 mL). The combined organic layers were dried with solid NaOH, filtered. The volatile components were evaporated under atmospheric pressure. The solvent was distilled off under ambient pressure, and the residue was distilled under reduced pressure, the fraction boiling at 44–49 °C (11 Torr) was collected. Yield 128 g (86%). Colorless liquid.

<sup>1</sup>H NMR (300 MHz, Chloroform-*d*) δ 2.94 (br s, 6H), 2.03 (s, 9H).

<sup>13</sup>C NMR (75 MHz, Chloroform-*d*) δ 76.9, 39.9.

**Hydrofluoroalkylation of alkenes with Freon-12 (General procedure A).**

A test tube was evacuated and filled with argon. Then, acetonitrile (1 mL), triazinane **N1** (129 g, 1 mmol), alkene (0.5 mmol), 2-methylpropane-2-thiol (6 μL, 0.05 mmol), and 4CzIPN (2 mg, 0.0025 mmol) were added. The mixture was cooled to –40 °C (acetone/liq. nitrogen) and gaseous dichlorodifluoromethane (**2a**) (ca. 36 mL, 1.5 mmol) was gradually injected into the frozen mixture via a syringe (the syringe needle was inserted into the reaction mixture). The tube was sealed with a screw-cap, the cooling bath was removed, and the mixture was irradiated with a strip of blue light (455 nm, 10W) for 5 hours. The mixture was quenched with water (5 mL) and extracted with hexane (3×1.5mL). The combined organic phases were filtered through a short pad of Na<sub>2</sub>SO<sub>4</sub> and concentrated on a rotary evaporator. The residue was purified by column chromatography.

**(5-Chloro-5,5-difluoropentyl)benzene (3a)**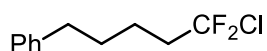

Yield 101 mg (92%). Colorless oil. Chromatography: hexanes.

<sup>1</sup>H NMR (300 MHz, Chloroform-*d*) δ 7.42 – 7.20 (m, 5H), 2.72 (t, *J* = 7.0 Hz, 2H), 2.48 – 2.30 (m, 2H), 1.87 – 1.64 (m, 4H).

<sup>13</sup>C NMR (75 MHz, Chloroform-*d*) δ 141.9, 130.1 (t, *J* = 291.8 Hz), 128.6, 128.5, 126.1, 41.9 (t, *J* = 23.9 Hz), 35.7, 30.5, 23.1 (t, *J* = 3.0 Hz).

<sup>19</sup>F NMR (282 MHz, Chloroform-*d*) δ -51.29 (t, *J* = 13.1 Hz).

**6-Chloro-6,6-difluorohexyl benzoate (3b)**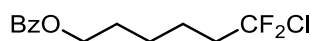

Yield 116 mg (84%). Colorless oil. Chromatography: hexanes/EtOAc, 20/1.

<sup>1</sup>H NMR (300 MHz, Chloroform-*d*) δ 8.03 (d, *J* = 7.4 Hz, 2H), 7.61 – 7.48 (m, 1H), 7.43 (t, *J* = 7.6 Hz, 2H), 4.33 (t, *J* = 6.5 Hz, 2H), 2.41 – 2.21 (m, 2H), 1.88 – 1.72 (m, 2H), 1.77 – 1.61 (m, 2H), 1.61 – 1.45 (m, 2H).

<sup>13</sup>C{<sup>1</sup>H} NMR (75 MHz, Chloroform-*d*) δ 166.6, 133.0, 130.4, 130.0 (t, *J* = 291.7 Hz), 129.6, 128.4, 64.6, 41.8 (t, *J* = 23.9 Hz), 28.5, 25.2, 23.1 (t, *J* = 3.1 Hz).

$^{19}\text{F}$  NMR (282 MHz, Chloroform-*d*)  $\delta$  -51.36 (t,  $J$  = 12.9 Hz, 2F).

HRMS (ESI): calcd for  $\text{C}_{13}\text{H}_{15}^{35}\text{ClF}_2\text{O}_2\text{Na}$  ( $\text{M}+\text{Na}$ ) 299.0621, found 299.0620.

### (((6-Chloro-6,6-difluorohexyl)oxy)methyl)benzene (3c)

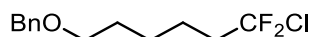

Yield 95 mg (72%). Colorless oil. Chromatography: hexanes/EtOAc, 30/1.

$^1\text{H}$  NMR (300 MHz, Chloroform-*d*)  $\delta$  7.30 – 7.17 (m, 5H), 4.43 (s, 2H), 3.40 (t,  $J$  = 6.3 Hz, 2H), 2.30 – 2.10 (m, 2H), 1.70 – 1.48 (m, 4H), 1.47 – 1.30 (m, 2H).

$^{13}\text{C}\{^1\text{H}\}$  NMR (75 MHz, Chloroform-*d*)  $\delta$  138.6, 130.1 (t,  $J$  = 291.7 Hz), 128.5, 127.70, 127.65, 73.0, 70.0, 41.9 (t,  $J$  = 23.8 Hz), 29.5, 25.4, 23.2 (t,  $J$  = 3.0 Hz).

$^{19}\text{F}$  NMR (282 MHz, Chloroform-*d*)  $\delta$  -51.26 (t,  $J$  = 13.2 Hz, 2F).

HRMS (ESI): calcd for  $\text{C}_{13}\text{H}_{17}^{35}\text{ClF}_2\text{ONa}$  ( $\text{M}+\text{Na}$ ) 285.0828, found 285.0832.

### Tributyl(3-chloro-3,3-difluoropropyl)silane (3d)

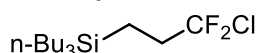

Modified General procedure A: amounts of the reagents, **N1** (194 mg, 1.5 mmol), **2a** (48 mL, 2 mmol) and 4CzIPN (4 mg, 0.005 mmol).

Yield 144 mg (92%). Colorless oil. Chromatography: hexanes.

$^1\text{H}$  NMR (300 MHz, Chloroform-*d*)  $\delta$  2.32 – 2.11 (m, 2H), 1.43 – 1.19 (m, 12H), 0.90 (t,  $J$  = 6.9 Hz, 9H), 0.86 – 0.75 (m, 2H), 0.64 – 0.49 (m, 6H).

$^{13}\text{C}\{^1\text{H}\}$  NMR (75 MHz, Chloroform-*d*)  $\delta$  131.4 (t,  $J$  = 292.3 Hz), 37.4 (t,  $J$  = 25.0 Hz), 26.9, 26.1, 13.9, 12.0, 5.9.

$^{19}\text{F}$  NMR (282 MHz, Chloroform-*d*)  $\delta$  -53.77 (t,  $J$  = 12.7 Hz).

Anal. Calcd for  $\text{C}_{17}\text{H}_{17}\text{ClF}_2$ : C, 57.57; H 9.98. Found: C 58.00, H 9.90.

### (5-Chloro-5,5-difluoropentane-1,1-diyl)dibenzene (3e)

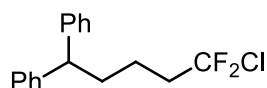

Yield 113 mg (77%). Colorless oil. Chromatography: hexanes.

$^1\text{H}$  NMR (300 MHz, Chloroform-*d*)  $\delta$  7.45 – 7.24 (m, 10H), 4.01 (t,  $J$  = 7.9 Hz, 1H), 2.50 – 2.30 (m, 2H), 2.22 (q,  $J$  = 7.9 Hz, 2H), 1.79 – 1.62 (m, 2H).

$^{13}\text{C}\{^1\text{H}\}$  NMR (75 MHz, Chloroform-*d*)  $\delta$  144.5, 130.0 (t,  $J$  = 291.9 Hz), 128.7, 127.9, 126.5, 51.2, 41.8 (t,  $J$  = 23.9 Hz), 34.7, 22.0 (t,  $J$  = 3.0 Hz).

$^{19}\text{F}$  NMR (282 MHz, Chloroform-*d*)  $\delta$  -51.08 (t,  $J$  = 13.1 Hz).

Anal. Calcd for  $\text{C}_{17}\text{H}_{17}\text{ClF}_2$ : C, 69.27; H 5.81. Found: C 69.20, H 6.00.

### 7-Chloro-7,7-difluoro-2-methylheptan-3-ol (3f)

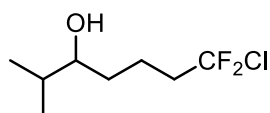

Yield 79 mg (79%). Pale-yellow oil. Chromatography: DCM/pentane, 5/1 with gradient elution to DCM.

$^1\text{H}$  NMR (300 MHz, Chloroform-*d*)  $\delta$  3.35 (ddd,  $J$  = 8.8, 5.2, 3.5 Hz, 1H), 2.30 (tt,  $J$  = 13.1, 7.9 Hz, 2H), 1.94 – 1.74 (m, 1H), 1.73 – 1.33 (m, 5H), 1.01 (d,  $J$  = 6.8 Hz, 6H).



$^{13}\text{C}\{^1\text{H}\}$  NMR (75 MHz, Chloroform-*d*)  $\delta$  130.12 (t,  $J = 291.7$  Hz), 76.4, 42.0 (t,  $J = 23.8$  Hz), 33.8, 32.9, 20.2 (t,  $J = 3.2$  Hz), 18.8, 17.3.

$^{19}\text{F}$  NMR (282 MHz, Chloroform-*d*)  $\delta$  -51.40 (t,  $J = 13.1$  Hz).

HRMS (ESI): calcd for  $\text{C}_8\text{H}_{15}^{35}\text{ClF}_2\text{ONa}$  (M+Na) 223.0672, found 223.0662.

### 5-Chloro-5,5-difluoropentyl 4-chlorobenzoate (3g)

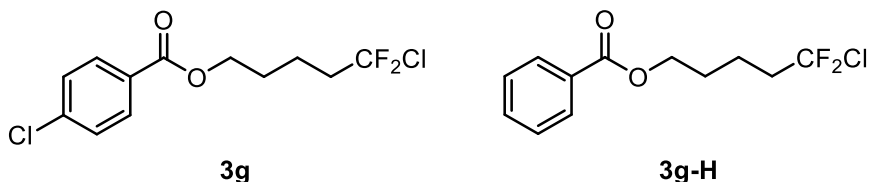

Yield 125 mg (84%). Colorless oil. Chromatography: hexanes/EtOAc, 20/1. According to GC-MS analysis, the compound contains ca. 2% of impurity, which can be ascribed to the protodechlorinated product **3g-H** (MS peaks:  $m/z$ , 105, 262, 264).

$^1\text{H}$  NMR (300 MHz, Chloroform-*d*)  $\delta$  7.96 (d,  $J = 8.5$  Hz, 2H), 7.40 (d,  $J = 8.5$  Hz, 2H), 4.34 (t,  $J = 6.0$  Hz, 2H), 2.46 – 2.27 (m, 2H), 1.93 – 1.67 (m, 4H).

$^{13}\text{C}\{^1\text{H}\}$  NMR (75 MHz, Chloroform-*d*)  $\delta$  165.7, 139.6, 131.0, 129.8 (t,  $J = 291.8$  Hz), 128.8, 128.7, 64.45, 41.5 (t,  $J = 24.1$  Hz), 27.8, 20.2 (t,  $J = 3.2$  Hz); Impurity:  $\delta$  133.1, 130.7, 129.6, 128.5.

$^{19}\text{F}$  NMR (282 MHz, Chloroform-*d*)  $\delta$  -51.50 (t,  $J = 12.9$  Hz).

HRMS (ESI): calcd for  $\text{C}_{12}\text{H}_{12}^{35}\text{Cl}_2\text{F}_2\text{O}_2\text{Na}$  (M+Na) 319.0075, found 319.0074.

### 4-(4-Chloro-4,4-difluorobutyl)-1,2-dimethoxybenzene (3h)

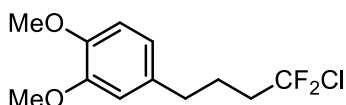

Yield 107 mg (81%). Colorless oil. Chromatography: hexanes/EtOAc, 10/1.

$^1\text{H}$  NMR (300 MHz, Chloroform-*d*)  $\delta$  6.84 – 6.74 (m, 1H), 6.74 – 6.60 (m, 2H), 3.87 (s, 3H), 3.85 (s, 3H), 2.63 (t,  $J = 7.5$  Hz, 2H), 2.36 – 2.16 (m, 2H), 2.00 – 1.82 (m, 2H).

$^{13}\text{C}\{^1\text{H}\}$  NMR (75 MHz, Chloroform-*d*)  $\delta$  149.0, 147.5, 133.3, 130.0 (t,  $J = 291.7$  Hz), 120.3, 111.6, 111.4, 55.9, 55.8, 41.1 (t,  $J = 23.9$  Hz), 34.1, 25.0 (t,  $J = 2.8$  Hz).

$^{19}\text{F}$  NMR (282 MHz, Chloroform-*d*)  $\delta$  -51.13 (t,  $J = 13.2$  Hz, 2F).

HRMS (ESI): calcd for  $\text{C}_{12}\text{H}_{15}^{35}\text{ClF}_2\text{O}_2\text{Na}$  (M+Na) 287.0621, found 287.0632.

### 4-(5-Chloro-5,5-difluoropentyl)morpholine (3i)

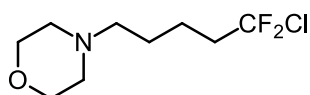

Yield 89 mg (78%). Colorless oil. Chromatography: hexanes/EtOAc, 1/1 with gradient elution to MeOH.

$^1\text{H}$  NMR (300 MHz, Chloroform-*d*)  $\delta$  3.69 (t,  $J = 4.5$  Hz, 4H), 2.40 (t,  $J = 4.5$  Hz, 4H), 2.37 – 2.19 (m, 4H), 1.69 – 1.48 (m, 4H).

$^{13}\text{C}\{^1\text{H}\}$  NMR (75 MHz, Chloroform-*d*)  $\delta$  130.0 (t,  $J = 291.8$  Hz), 67.1, 58.5, 53.8, 41.8 (t,  $J = 23.9$  Hz), 25.6, 21.4 (t,  $J = 3.1$  Hz).

$^{19}\text{F}$  NMR (282 MHz, Chloroform-*d*)  $\delta$  -51.40 (t,  $J = 12.9$  Hz).

HRMS (ESI): calcd for  $\text{C}_{19}\text{H}_{17}^{35}\text{ClF}_2\text{NO}$  (M+H) 228.0961, found 228.0964.

#### 4-((7-Chloro-7,7-difluoroheptyl)thio)-2,3,5,6-tetrafluoropyridine (**3j**)

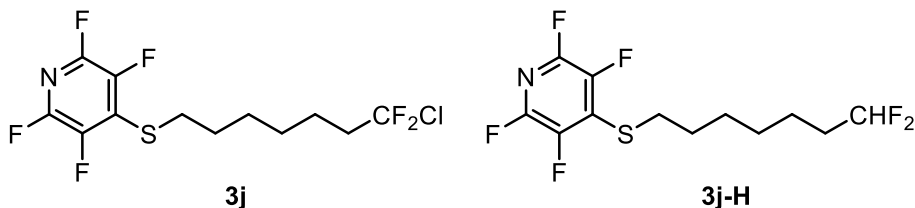

Yield 109 mg (62%). Colorless oil. Chromatography: hexanes/EtOAc, 50/1. According to GC-MS analysis, the compound contains ca. 2% of impurity, which can be ascribed to the protodechlorinated product **3j-H** (MS peak: *m/z*, 317).

<sup>1</sup>H NMR (300 MHz, Chloroform-*d*) δ 3.18 (t, *J* = 7.3 Hz, 2H), 2.37 – 2.13 (m, 2H), 1.76 – 1.55 (m, 4H), 1.55 – 1.31 (m, 4H). Impurity: δ 5.78 (tt, *J* = 56.9, 4.3 Hz)

<sup>13</sup>C NMR (75 MHz, Chloroform-*d*) δ 143.6 (dm, *J* = 245.5 Hz), 141.3 (dm, *J* = 255.4 Hz), 131.6 (t, *J* = 17.3 Hz), 130.1 (t, *J* = 291.7 Hz), 41.8 (t, *J* = 23.9 Hz), 33.1 (t, *J* = 4.9 Hz), 29.7, 28.1, 28.1, 23.2 (t, *J* = 3.0 Hz). Impurity: δ 117.4 (t, *J* = 238.7 Hz)

<sup>19</sup>F NMR (282 MHz, Chloroform-*d*) δ -51.48 (t, *J* = 12.9 Hz, 2F), -91.92 – -92.86 (m, 2F), -139.22 – -139.96 (m, 2F). Impurity: δ -116.77 (dt, *J* = 56.9, 17.5 Hz)

HRMS (ESI): calcd for C<sub>11</sub>H<sub>11</sub><sup>35</sup>ClF<sub>6</sub>NSNa (M+Na) 374.0175, found 374.0167.

#### Diethyl 2-(4-chloro-4,4-difluorobutyl)malonate (**3k**)

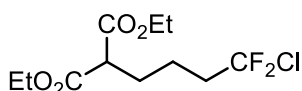

Modified General procedure A: amounts of the reagents, **N1** (194 mg, 1.5 mmol), **2a** (48 mL, 2 mmol) and 4CzIPN (4 mg, 0.005 mmol).

Yield 123 mg (86%). Colorless oil. Chromatography: hexanes/EtOAc, 12/1.

<sup>1</sup>H NMR (300 MHz, Chloroform-*d*) δ 4.18 (q, *J* = 7.1 Hz, 4H), 3.31 (t, *J* = 7.4 Hz, 1H), 2.39 – 2.20 (m, 2H), 1.94 (q, *J* = 7.8 Hz, 2H), 1.77 – 1.58 (m, 2H), 1.24 (t, *J* = 7.1 Hz, 6H).

<sup>13</sup>C NMR (75 MHz, Chloroform-*d*) δ 169.0, 129.6 (t, *J* = 291.8 Hz), 61.56, 51.6, 41.5 (t, *J* = 24.2 Hz), 27.6, 21.3 (t, *J* = 3.2 Hz), 14.1.

<sup>19</sup>F NMR (282 MHz, Chloroform-*d*) δ -51.60 (t, *J* = 12.8 Hz).

HRMS (ESI): calcd for C<sub>11</sub>H<sub>17</sub>ClF<sub>2</sub>O<sub>4</sub>Na (M+Na) 309.0676, found 309.0666.

#### (5-Chloro-5,5-difluoropentyl)(phenyl)sulfane (**3l**)

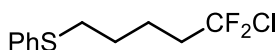

Modified General procedure A: amount of the reagent, 2-methylpropane-2-thiol (12 μL, 0.1 mmol).

Yield 89 mg (71%). Colorless oil. Chromatography: hexanes/EtOAc, 50/1.

<sup>1</sup>H NMR (300 MHz, Chloroform-*d*) δ 7.41 – 7.26 (m, 4H), 7.21 (t, *J* = 7.1 Hz, 1H), 2.95 (t, *J* = 6.6 Hz, 2H), 2.40 – 2.21 (m, 2H), 1.87 – 1.64 (m, 4H).

<sup>13</sup>C NMR (75 MHz, Chloroform-*d*) δ 136.3, 129.9 (t, *J* = 291.7 Hz), 129.6, 129.1, 126.3, 41.5 (t, *J* = 24.1 Hz), 33.5, 28.2, 22.5 (t, *J* = 3.0 Hz).

<sup>19</sup>F NMR (282 MHz, Chloroform-*d*) δ -51.35 (t, *J* = 13.0 Hz).

HRMS (ESI): calcd for C<sub>11</sub>H<sub>13</sub><sup>35</sup>ClF<sub>2</sub>S<sup>107</sup>Ag (M+Ag) 356.9440, found 356.9434.

**4-Chloro-4,4-difluorobutyl benzoate (3m)**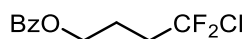

Modified General procedure A: amounts of the reagents, **N1** (194 mg, 1.5 mmol), **2a** (48 mL, 2 mmol) and 4CzIPN (4 mg, 0.005 mmol).

Yield 80 mg (64%). Colorless oil. Chromatography: hexanes/EtOAc, 20/1. According to GC-MS analysis, <sup>1</sup>H NMR and <sup>19</sup>F NMR, the compound contains ca. 2% of impurity, which can be ascribed to the regioisomeric product (3,3,3-trifluoro-2-methylpropyl benzoate).

<sup>1</sup>H NMR (300 MHz, Chloroform-*d*) δ 8.09 – 8.00 (m, 2H), 7.64 – 7.52 (m, 1H), 7.46 (t, *J* = 7.6 Hz, 2H), 4.40 (t, *J* = 6.3 Hz, 2H), 2.59 – 2.39 (m, 2H), 2.19 – 2.04 (m, 2H); impurity: δ 1.31 (d, *J* = 6.9 Hz).

<sup>13</sup>C NMR (76 MHz, Chloroform-*d*) δ 166.5, 133.3, 130.0, 129.69, 129.67 (t, *J* = 291.4 Hz), 128.6, 63.2, 39.0 (t, *J* = 24.8 Hz), 23.2 (t, *J* = 3.3 Hz).

<sup>19</sup>F NMR (282 MHz, Chloroform-*d*) δ -51.67 (t, *J* = 12.8 Hz); impurity: δ -55.24 (d, *J* = 9.4 Hz).

HRMS (ESI): calcd for C<sub>11</sub>H<sub>11</sub><sup>35</sup>ClF<sub>2</sub>O<sub>2</sub>Na (M+Na) 271.0308, found 271.0299.

**1-((5-Chloro-5,5-difluoropentyl)oxy)-4-methoxybenzene (3n)**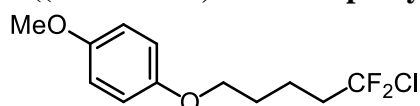

Yield 69 mg (52%). Colorless solid. Mp 37-40 °C. Chromatography: hexanes/EtOAc, 15/1.

<sup>1</sup>H NMR (300 MHz, Chloroform-*d*) δ 6.85 (s, 4H), 3.95 (t, *J* = 5.6 Hz, 2H), 3.78 (s, 3H), 2.48 – 2.28 (m, 2H), 1.92 – 1.75 (m, 4H).

<sup>13</sup>C{<sup>1</sup>H} NMR (75 MHz, Chloroform-*d*) δ 154.1, 153.1, 130.0 (t, *J* = 291.8 Hz), 115.56, 114.8, 68.0, 55.8, 41.7 (t, *J* = 23.9 Hz), 28.4, 20.4 (t, *J* = 3.2 Hz).

<sup>19</sup>F NMR (282 MHz, Chloroform-*d*) δ -51.40 (t, *J* = 12.8 Hz).

HRMS (ESI): calcd for C<sub>12</sub>H<sub>15</sub><sup>35</sup>ClF<sub>2</sub>O<sub>2</sub> (M) 264.0723, found 264.0721.

**Fluoroalkylation of alkenes (General procedure B).**

A test tube was evacuated and filled with argon. Then, acetonitrile (1 mL), triazinane **N1** (129 g, 1 mmol), alkene (0.5 mmol), fluoroalkyl chloride (0.875 mmol) or chloroform (160 μL, 2 mmol), 2-methylpropane-2-thiol (6 μL, 0.05 mmol), 4CzIPN (2 mg, 0.0025 mmol) were added. The tube was screw-capped and irradiated with 455 nm (10W) strip for 5 hours. The reaction was quenched with water (5 mL) and extracted with hexane (3×1.5mL). The combined organic phases were filtered through a short pad of Na<sub>2</sub>SO<sub>4</sub> and concentrated on a rotary evaporator. The residue was purified by column chromatography.

**Ethyl 8-((*tert*-butyldimethylsilyl)oxy)-2,2,3,3-tetrafluorooctanoate (4a)**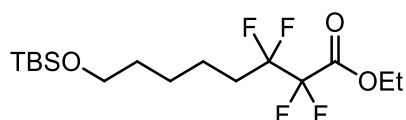

Yield 169 mg (90%). Colorless oil. Chromatography: hexanes/EtOAc, 20/1.

<sup>1</sup>H NMR (300 MHz, Chloroform-*d*) δ 4.39 (q, *J* = 7.1 Hz, 2H), 3.61 (t, *J* = 6.2 Hz, 2H), 2.04 (tt, *J* = 18.4, 8.0 Hz, 2H), 1.66 – 1.43 (m, 4H), 1.48 – 1.31 (m, 5H), 0.89 (s, 9H), 0.04 (s, 6H).

<sup>13</sup>C{<sup>1</sup>H} NMR (75 MHz, Chloroform-*d*) δ 160.8 (t, *J* = 30.4 Hz), 118.1 (tt, *J* = 251.6, 31.6 Hz), 109.7 (tt, *J* = 261.4, 37.0 Hz), 63.8, 62.9, 32.5, 30.7 (t, *J* = 22.4 Hz), 26.1, 25.7, 20.3 (t, *J* = 3.7 Hz), 18.5, 14.0, -5.2.

$^{19}\text{F}$  NMR (282 MHz, Chloroform-*d*)  $\delta$  -115.62 (t,  $J = 18.8$  Hz), -120.92 (s, 2F).

HRMS (ESI): calcd for  $\text{C}_{16}\text{H}_{30}\text{F}_4\text{O}_3\text{SiNa}$  ( $\text{M}+\text{Na}$ ) 397.1793, found 397.1791.

#### Ethyl 2,2,3,3-tetrafluoro-7-(trimethylsilyl)heptanoate (4b)

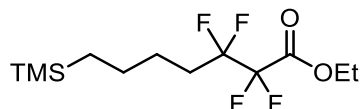

Yield 130 mg (86%). Colorless oil. Chromatography: hexanes/EtOAc, 50/1.

$^1\text{H}$  NMR (300 MHz, Chloroform-*d*)  $\delta$  4.39 (q,  $J = 7.2$  Hz, 2H), 2.16 – 1.92 (m, 2H), 1.65 – 1.54 (m, 2H), 1.46 – 1.29 (m, 5H), 0.57 – 0.45 (m, 2H), -0.02 (s, 9H).

$^{13}\text{C}\{^1\text{H}\}$  NMR (75 MHz, Chloroform-*d*)  $\delta$  160.8 (t,  $J = 30.3$  Hz), 118.5 (tt,  $J = 251.4, 31.7$  Hz), 109.7 (tt,  $J = 261.2, 37.2$  Hz), 63.8, 30.3 (t,  $J = 22.4$  Hz), 24.1 (t,  $J = 3.4$  Hz), 23.8, 16.6, 14.0, -1.6.

$^{19}\text{F}$  NMR (282 MHz, Chloroform-*d*)  $\delta$  -115.51 (t,  $J = 19.1$  Hz, 2F), -120.93 (s, 2F).

HRMS (ESI): calcd for  $\text{C}_{12}\text{H}_{22}\text{F}_4\text{O}_2\text{SiNa}$  ( $\text{M}+\text{Na}$ ) 325.1217, found 325.1219.

#### Ethyl 5-cyclohexyl-2,2,3,3-tetrafluoropentanoate (4c)

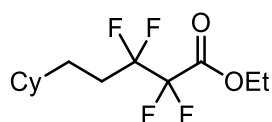

Yield 125 mg (88%). Colorless oil. Chromatography: hexanes/EtOAc, 30/1.

$^1\text{H}$  NMR (300 MHz, Chloroform-*d*)  $\delta$  4.39 (q,  $J = 7.2$  Hz, 2H), 2.16 – 1.92 (m, 2H), 1.76 – 1.61 (m, 5H), 1.54 – 1.41 (m, 2H), 1.37 (t,  $J = 7.2$  Hz, 3H), 1.31 – 1.03 (m, 4H), 1.00 – 0.82 (m, 2H).

$^{13}\text{C}\{^1\text{H}\}$  NMR (75 MHz, Chloroform-*d*)  $\delta$  160.8 (t,  $J = 30.4$  Hz), 118.6 (tt,  $J = 251.9, 31.7$  Hz), 109.74 (tt,  $J = 261.0, 37.1$  Hz), 63.8, 37.4, 33.1, 28.2 (t,  $J = 22.4$  Hz), 27.5 (t,  $J = 3.3$  Hz), 26.6, 26.3, 14.0.

$^{19}\text{F}$  NMR (282 MHz, Chloroform-*d*)  $\delta$  -115.89 (t,  $J = 19.0$  Hz, 2F), -120.89 (s, 2F).

HRMS (ESI): calcd for  $\text{C}_{13}\text{H}_{20}\text{F}_4\text{O}_2\text{Na}$  ( $\text{M}+\text{Na}$ ) 307.1292, found 307.1291.

#### Ethyl 2,2,3,3-tetrafluoro-8-oxononanoate (4d)

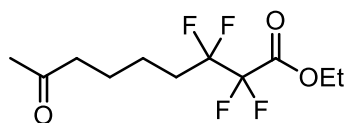

Yield 118 mg (87%). Pale-yellow oil. Chromatography: hexanes/EtOAc, 4/1.

$^1\text{H}$  NMR (300 MHz, Chloroform-*d*)  $\delta$  4.33 (q,  $J = 7.1$  Hz, 2H), 2.42 (t,  $J = 6.8$  Hz, 2H), 2.08 (s, 3H), 2.05 – 1.88 (m, 2H), 1.68 – 1.43 (m, 4H), 1.31 (t,  $J = 7.1$  Hz, 3H).

$^{13}\text{C}\{^1\text{H}\}$  NMR (75 MHz, Chloroform-*d*)  $\delta$  208.1, 160.5 (t,  $J = 30.2$  Hz), 118.1 (tt,  $J = 251.9, 31.6$  Hz), 109.5 (tt,  $J = 261.3, 36.8$  Hz), 63.8, 43.1, 30.5 (t,  $J = 22.5$  Hz), 29.8, 23.2, 20.0 (t,  $J = 3.9$  Hz), 13.8.

$^{19}\text{F}$  NMR (282 MHz, Chloroform-*d*)  $\delta$  -115.61 (t,  $J = 18.8$  Hz, 2F), -120.93 (s, 2F).

HRMS (ESI): calcd for  $\text{C}_{11}\text{H}_{16}\text{F}_4\text{O}_3\text{Na}$  ( $\text{M}+\text{Na}$ ) 295.0928, found 295.0936.

**Ethyl 6-((*tert*-butyldimethylsilyl)oxy)-2,2,3,3-tetrafluorohexanoate (4e)**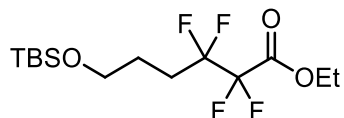

Yield 142 mg (82%). Colorless oil. Chromatography: hexanes/EtOAc, 20/1.

$^1\text{H}$  NMR (300 MHz, Chloroform-*d*)  $\delta$  4.45 – 4.31 (m, 2H), 3.66 (t,  $J = 5.8$  Hz, 2H), 2.26 – 1.99 (m, 2H), 1.85 – 1.70 (m, 2H), 1.35 (t,  $J = 7.2$  Hz, 3H), 0.89 (s, 9H), 0.04 (s, 6H).

$^{13}\text{C}\{^1\text{H}\}$  NMR (75 MHz, Chloroform-*d*)  $\delta$  160.7 (t,  $J = 30.4$  Hz), 118.6 (tt,  $J = 251.8, 31.6$  Hz), 109.7 (tt,  $J = 261.2, 36.9$  Hz), 63.8, 61.9, 27.5 (t,  $J = 22.4$  Hz), 26.0, 24.0 (t,  $J = 3.4$  Hz), 13.9, -5.3.

$^{19}\text{F}$  NMR (282 MHz, Chloroform-*d*)  $\delta$  -115.49 (t,  $J = 19.1$  Hz, 2F), -120.98 (s, 2F).

HRMS (ESI): calcd for  $\text{C}_{14}\text{H}_{26}\text{F}_4\text{O}_3\text{SiNa}$  ( $\text{M}+\text{Na}$ ) 369.1480, found 369.1486.

**Ethyl 2,2,3,3-tetrafluoro-8-((triisopropylsilyl)oxy)octanoate (4e)**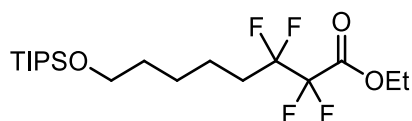

Yield 173 mg (83%). Colorless oil. Chromatography: hexanes/EtOAc, 30/1.

$^1\text{H}$  NMR (300 MHz, Chloroform-*d*)  $\delta$  4.39 (q,  $J = 7.2$  Hz, 2H), 3.69 (t,  $J = 6.1$  Hz, 2H), 2.05 (tt,  $J = 18.8, 7.9$  Hz, 2H), 1.69 – 1.51 (m, 4H), 1.51 – 1.40 (m, 2H), 1.36 (t,  $J = 7.2$  Hz, 3H), 1.10 – 1.00 (m, 21H).

$^{13}\text{C}\{^1\text{H}\}$  NMR (75 MHz, Chloroform-*d*)  $\delta$  160.7 (t,  $J = 30.4$  Hz), 118.4 (tt,  $J = 251.7, 31.7$  Hz), 109.7 (tt,  $J = 261.2, 37.1$  Hz), 63.8, 63.2, 32.7, 30.7 (t,  $J = 22.4$  Hz), 25.8, 20.3 (t,  $J = 3.7$  Hz), 18.1, 14.0, 12.2.

$^{19}\text{F}$  NMR (282 MHz, Chloroform-*d*)  $\delta$  -115.65 (t,  $J = 18.8$  Hz, 2F), -120.95 (s, 2F).

HRMS (ESI): calcd for  $\text{C}_{19}\text{H}_{36}\text{F}_4\text{O}_3\text{SiNa}$  ( $\text{M}+\text{Na}$ ) 439.2262, found 439.2275.

**Ethyl 7-(diethoxyphosphoryl)-2,2,3,3-tetrafluoroheptanoate (4g)**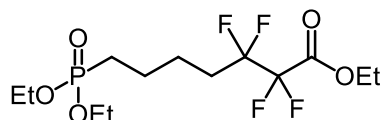

Yield 159 mg (87%). Colorless oil. Chromatography: EtOAc /EtOH, 20/1.

$^1\text{H}$  NMR (300 MHz, Chloroform-*d*)  $\delta$  4.34 (q,  $J = 7.1$  Hz, 2H), 4.16 – 3.94 (m, 4H), 2.16 – 1.88 (m, 2H), 1.82 – 1.50 (m, 6H), 1.41 – 1.17 (m, 9H).

$^{13}\text{C}\{^1\text{H}\}$  NMR (75 MHz, Chloroform-*d*)  $\delta$  160.4 (t,  $J = 30.3$  Hz), 118.1 (tt,  $J = 251.9, 31.7$  Hz), 109.5 (tt,  $J = 261.4, 36.9$  Hz), 63.8, 61.5 (d,  $J = 6.4$  Hz), 30.1 (t,  $J = 22.6$  Hz), 25.5 (d,  $J = 141.8$  Hz), 22.2 (d,  $J = 5.0$  Hz), 21.3 (dt,  $J = 17.1, 3.8$  Hz), 16.4 (d,  $J = 6.0$  Hz), 13.8.

$^{19}\text{F}$  NMR (282 MHz, Chloroform-*d*)  $\delta$  -115.65 (t,  $J = 18.6$  Hz, 2F), -120.98 (s, 2F).

HRMS (ESI): calcd for  $\text{C}_{13}\text{H}_{23}\text{F}_4\text{O}_5\text{PNa}$  ( $\text{M}+\text{Na}$ ) 389.1111, found 389.1114.

**Ethyl 2,2,3,3-tetrafluoro-7-(4,4,5,5-tetramethyl-1,3,2-dioxaborolan-2-yl)heptanoate (4h)**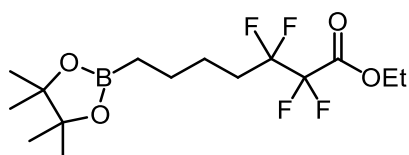

Yield 119 mg (67%). Colorless oil. Chromatography: hexanes/EtOAc, 12/1.

$^1\text{H}$  NMR (300 MHz, Chloroform-*d*)  $\delta$  4.35 (q,  $J = 7.2$  Hz, 2H), 2.11 – 1.88 (m, 2H), 1.63 – 1.40 (m, 4H), 1.33 (t,  $J = 7.2$  Hz, 3H), 1.20 (s, 12H), 0.77 (t,  $J = 7.5$  Hz, 2H).

$^{13}\text{C}$  NMR (75 MHz, Chloroform-*d*)  $\delta$  160.7 (t,  $J = 30.3$  Hz), 118.4 (tt,  $J = 251.6, 31.7$  Hz), 109.7 (tt,  $J = 261.3, 37.1$  Hz), 83.1, 63.7, 30.5 (t,  $J = 22.4$  Hz), 24.9, 23.8, 22.8 (t,  $J = 3.7$  Hz), 13.9, 11.0.

$^{19}\text{F}$  NMR (282 MHz, Chloroform-*d*)  $\delta$  -115.63 (t,  $J = 18.9$  Hz, 2F), -120.99 (s, 2F).

HRMS (ESI): calcd for  $\text{C}_{15}\text{H}_{25}\text{BF}_4\text{O}_4\text{Na}$  ( $\text{M}+\text{Na}$ ) 379.1677, found 379.1673.

#### Ethyl 2,2,3,3-tetrafluoro-5-methyl-7-phenylheptanoate (4i)

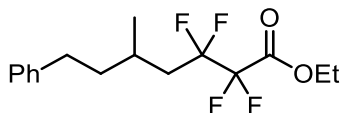

Yield 131 mg (82%). Colorless oil. Chromatography: hexanes/EtOAc, 30/1.

$^1\text{H}$  NMR (300 MHz, Chloroform-*d*)  $\delta$  7.36 – 7.26 (m, 2H), 7.26 – 7.16 (m, 3H), 4.41 (q,  $J = 7.2$  Hz, 2H), 2.78 – 2.54 (m, 2H), 2.31 – 1.69 (m, 4H), 1.69 – 1.51 (m, 1H), 1.39 (t,  $J = 7.2$  Hz, 3H), 1.13 (d,  $J = 6.3$  Hz, 3H).

$^{13}\text{C}\{^1\text{H}\}$  NMR (75 MHz, Chloroform-*d*)  $\delta$  160.7 (t,  $J = 30.3$  Hz), 142.2, 128.52, 128.45, 126.0, 118.8 (tt,  $J = 253.0, 31.4$  Hz), 109.6 (tt,  $J = 261.5, 37.1$  Hz), 63.9, 39.4, 36.6 (t,  $J = 21.3$  Hz), 33.2, 26.6 (t,  $J = 2.1$  Hz), 20.6 (d,  $J = 2.1$  Hz), 14.0.

$^{19}\text{F}$  NMR (282 MHz, Chloroform-*d*)  $\delta$  -112.93 (ddd,  $J = 266.4, 31.0, 9.8$  Hz, 1F), -114.68 (ddd,  $J = 266.4, 29.3, 9.8$  Hz, 1F), -121.01 (s, 2F).

HRMS (ESI): calcd for  $\text{C}_{16}\text{H}_{20}\text{F}_4\text{O}_2\text{Na}$  ( $\text{M}+\text{Na}$ ) 343.1292, found 343.1292.

#### Ethyl 3-cyclooctyl-2,2,3,3-tetrafluoropropanoate (4j)

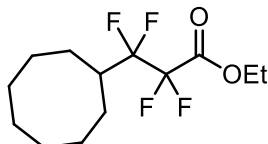

Modified General procedure B: 1 mmol of fluoroalkylchloride was used.

Yield 118 mg (83%). Colorless oil. Chromatography: hexanes/EtOAc, 40/1.

$^1\text{H}$  NMR (300 MHz, Chloroform-*d*)  $\delta$  4.39 (q,  $J = 7.1$  Hz, 2H), 2.44 – 2.30 (m, 1H), 1.98 – 1.76 (m, 2H), 1.79 – 1.62 (m, 2H), 1.67 – 1.41 (m, 10H), 1.37 (t,  $J = 7.1$  Hz, 3H).

$^{13}\text{C}\{^1\text{H}\}$  NMR (75 MHz, Chloroform-*d*)  $\delta$  161.0 (t,  $J = 30.8$  Hz), 119.6 (tt,  $J = 254.7, 30.4$  Hz), 110.8 (tt,  $J = 262.8, 39.2$  Hz), 63.7, 39.9 (t,  $J = 20.0$  Hz), 26.8, 26.5, 25.4, 25.0 (tt,  $J = 4.2, 1.9$  Hz), 13.9.

$^{19}\text{F}$  NMR (282 MHz, Chloroform-*d*)  $\delta$  -116.64 (d,  $J = 16.6$  Hz, 2F), -117.40 (s, 2F).

HRMS (ESI): calcd for  $\text{C}_{13}\text{H}_{20}\text{F}_4\text{O}_2\text{Na}$  ( $\text{M}+\text{Na}$ ) 307.1292, found 307.1290.

#### Ethyl 9-cyano-2,2,3,3-tetrafluorononanoate (4k)

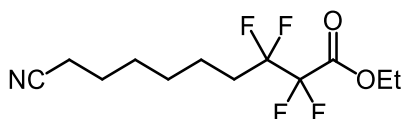

Yield 113 mg (80%). Colorless oil. Chromatography: hexanes/EtOAc, 4/1.

$^1\text{H}$  NMR (300 MHz, Chloroform-*d*)  $\delta$  4.35 (q,  $J = 7.2$  Hz, 2H), 2.31 (t,  $J = 7.0$  Hz, 2H), 2.13 – 1.89 (m, 2H), 1.72 – 1.50 (m, 4H), 1.49 – 1.26 (m, 7H).

$^{13}\text{C}\{^1\text{H}\}$  NMR (75 MHz, Chloroform-*d*)  $\delta$  160.4 (t,  $J = 30.2$  Hz), 119.6, 118.2 (tt,  $J = 251.8, 31.7$  Hz), 109.5 (tt,  $J = 261.3, 36.8$  Hz), 63.8, 30.3 (t,  $J = 22.4$  Hz), 28.27, 28.25, 25.1, 20.1 (t,  $J = 3.8$  Hz), 16.9, 13.7.

$^{19}\text{F}$  NMR (282 MHz, Chloroform-*d*)  $\delta$  -115.72 (t,  $J$  = 18.9 Hz, 2F), -121.01 (s, 2F).

HRMS (ESI): calcd for  $\text{C}_{12}\text{H}_{17}\text{F}_4\text{NO}_2\text{Na}$  ( $\text{M}+\text{Na}$ ) 306.1088, found 306.1094.

#### Ethyl 9-chloro-2,2,3,3-tetrafluorononanoate (4l)

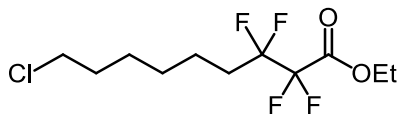

Yield 116 mg (79%). Colorless oil. Chromatography: hexanes/EtOAc, 25/1.

$^1\text{H}$  NMR (300 MHz, Chloroform-*d*)  $\delta$  4.38 (q,  $J$  = 7.1 Hz, 2H), 3.52 (t,  $J$  = 6.6 Hz, 2H), 2.16 – 1.92 (m, 2H), 1.78 (p,  $J$  = 6.8 Hz, 2H), 1.67 – 1.53 (m, 2H), 1.53 – 1.29 (m, 7H).

$^{13}\text{C}\{^1\text{H}\}$  NMR (75 MHz, Chloroform-*d*)  $\delta$  160.7 (t,  $J$  = 30.3 Hz), 118.3 (tt,  $J$  = 251.8, 31.7 Hz), 109.6 (tt,  $J$  = 261.4, 37.0 Hz), 63.9, 44.9, 32.4, 30.5 (t,  $J$  = 22.4 Hz), 28.6, 26.6, 20.3 (t,  $J$  = 3.8 Hz), 13.9.

$^{19}\text{F}$  NMR (282 MHz, Chloroform-*d*)  $\delta$  -115.65 (t,  $J$  = 19.1 Hz, 2F), -120.95 (s, 2F).

HRMS (ESI): calcd for  $\text{C}_{11}\text{H}_{17}^{35}\text{ClF}_4\text{O}_2\text{Na}$  ( $\text{M}+\text{Na}$ ) 315.0745, found 315.0736.

#### Ethyl 5-acetoxy-2,2,3,3-tetrafluoropentanoate (4m)

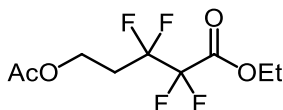

Modified General procedure B: irradiation time 10 hours.

Yield 81 mg (62%). Colorless oil. Chromatography: DCM. Compare to the general procedure,

$^1\text{H}$  NMR (300 MHz, Chloroform-*d*)  $\delta$  4.44 – 4.26 (m, 4H), 2.44 (tt,  $J$  = 18.3, 6.7 Hz, 2H), 2.04 (s, 3H), 1.35 (t,  $J$  = 7.2 Hz, 3H).

$^{13}\text{C}$  NMR (75 MHz, Chloroform-*d*)  $\delta$  170.7, 160.2 (t,  $J$  = 30.1 Hz), 117.3 (tt,  $J$  = 253.2, 32.1 Hz), 109.2 (tt,  $J$  = 261.8, 36.2 Hz), 64.1, 56.7 (t,  $J$  = 4.8 Hz), 30.3 (t,  $J$  = 21.8 Hz), 20.7, 13.9.

$^{19}\text{F}$  NMR (282 MHz, Chloroform-*d*)  $\delta$  -115.00 (t,  $J$  = 18.3 Hz, 2F), -121.07 (s, 2F).

HRMS (ESI): calcd for  $\text{C}_9\text{H}_{12}\text{F}_4\text{O}_4\text{Na}$  ( $\text{M}+\text{Na}$ ) 283.0564, found 283.0575.

#### Ethyl 2,2,3,3-tetrafluoro-7-((2-methoxyethoxy)methoxy)heptanoate (4n)

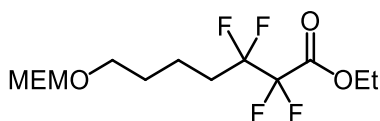

Yield 135 mg (81%). Colorless oil. Chromatography: hexanes/EtOAc, 3/1.

$^1\text{H}$  NMR (300 MHz, Chloroform-*d*)  $\delta$  4.67 (s, 2H), 4.36 (q,  $J$  = 7.1 Hz, 2H), 3.70 – 3.61 (m, 2H), 3.59 – 3.48 (m, 4H), 3.36 (s, 3H), 2.03 (tt,  $J$  = 18.8, 7.1 Hz, 2H), 1.73 – 1.55 (m, 4H), 1.33 (t,  $J$  = 7.1 Hz, 3H).

$^{13}\text{C}\{^1\text{H}\}$  NMR (75 MHz, Chloroform-*d*)  $\delta$  160.6 (t,  $J$  = 30.3 Hz), 118.3 (tt,  $J$  = 251.8, 31.8 Hz), 109.6 (tt,  $J$  = 261.4, 37.0 Hz), 95.6, 71.9, 67.2, 66.9, 63.8, 59.0, 30.4 (t,  $J$  = 22.4 Hz), 29.3, 17.5 (t,  $J$  = 4.0 Hz), 13.9.

$^{19}\text{F}$  NMR (282 MHz, Chloroform-*d*)  $\delta$  -115.75 (t,  $J$  = 18.8 Hz), -120.97.

HRMS (ESI): calcd for  $\text{C}_{13}\text{H}_{22}\text{F}_4\text{O}_5\text{Na}$  ( $\text{M}+\text{Na}$ ) 357.1296, found 357.1290.

**Ethyl 6,6-diethoxy-2,2,3,3-tetrafluorohexanoate (4o)**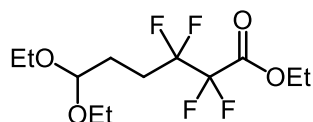

Yield 99 mg (65%). Colorless oil. Chromatography: hexanes/EtOAc, 12/1.

$^1\text{H}$  NMR (300 MHz, Chloroform-*d*)  $\delta$  4.50 (t,  $J = 5.4$  Hz, 1H), 4.36 (q,  $J = 7.1$  Hz, 2H), 3.62 (dq,  $J = 9.2, 7.1$  Hz, 2H), 3.47 (dq,  $J = 9.4, 7.1$  Hz, 2H), 2.24 – 2.00 (m, 2H), 1.91 – 1.72 (m, 2H), 1.33 (t,  $J = 7.1$  Hz, 3H), 1.17 (t,  $J = 7.1$  Hz, 6H).

$^{13}\text{C}$  NMR (75 MHz, Chloroform-*d*)  $\delta$  160.5 (t,  $J = 30.3$  Hz), 118.4 (tt,  $J = 251.8, 31.6$  Hz), 109.6 (tt,  $J = 261.3, 36.8$  Hz), 101.7, 63.8, 61.7, 26.0 (t,  $J = 22.4$  Hz), 25.0 (t,  $J = 3.5$  Hz), 15.3, 13.8.

$^{19}\text{F}$  NMR (282 MHz, Chloroform-*d*)  $\delta$  -115.60 (t,  $J = 18.9$  Hz, 2F), -120.94 (s, 2F).

HRMS (ESI): calcd for  $\text{C}_{12}\text{H}_{20}\text{F}_4\text{O}_4\text{Na}$  ( $\text{M}+\text{Na}$ ) 327.1190, found 327.1194.

**Ethyl 6-((*tert*-butoxycarbonyl)amino)-2,2,3,3-tetrafluorohexanoate (4p)**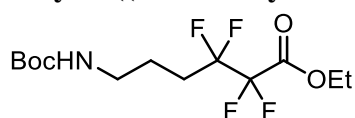

Yield 134 mg (81%). Colorless oil. Chromatography: hexanes/EtOAc, 5/1.

$^1\text{H}$  NMR (300 MHz, Chloroform-*d*)  $\delta$  4.57 (brs, 1H), 4.40 (q,  $J = 7.2$  Hz, 2H), 3.20 (q,  $J = 7.0$  Hz, 2H), 2.21 – 1.98 (m, 2H), 1.78 (p,  $J = 7.0$  Hz, 2H), 1.44 (s, 9H), 1.37 (t,  $J = 7.2$  Hz, 3H).

$^{13}\text{C}$  NMR (75 MHz, Chloroform-*d*)  $\delta$  160.51 (t,  $J = 30.4$  Hz), 156.09, 118.23 (tt,  $J = 252.1, 31.8$  Hz), 109.50 (tt,  $J = 261.4, 36.8$  Hz), 79.48, 63.90, 39.89, 28.42, 28.03 (t,  $J = 22.7$  Hz), 21.51 (t,  $J = 3.6$  Hz), 13.87.

$^{19}\text{F}$  NMR (282 MHz, Chloroform-*d*)  $\delta$  -115.33 (t,  $J = 19.1$  Hz), -120.79 (s, 2F).

HRMS (ESI): calcd for  $\text{C}_{13}\text{H}_{21}\text{F}_4\text{NO}_2\text{Na}$  ( $\text{M}+\text{Na}$ ) 354.1299, found 354.1295.

**Ethyl 2,2,3,3-tetrafluoro-7-(thiophen-2-yl)heptanoate (4q)**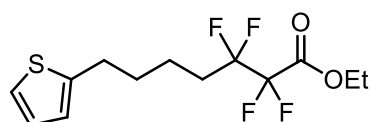

Yield 103 mg (66%). Colorless oil. Chromatography: hexanes/EtOAc, 25/1. Compare to the general procedure, 1.25 mmol of fluoroalkylchloride was used.

$^1\text{H}$  NMR (300 MHz, Chloroform-*d*)  $\delta$  7.13 (dd,  $J = 5.1, 1.1$  Hz, 1H), 6.94 (dd,  $J = 5.1, 3.4$  Hz, 1H), 6.81 (dq,  $J = 3.4, 1.1$  Hz, 1H), 4.41 (q,  $J = 7.2$  Hz, 2H), 2.89 (td,  $J = 7.0, 1.1$  Hz, 2H), 2.23 – 1.98 (m, 2H), 1.87 – 1.60 (m, 4H), 1.38 (t,  $J = 7.2$  Hz, 3H).

$^{13}\text{C}\{^1\text{H}\}$  NMR (75 MHz, Chloroform-*d*)  $\delta$  160.6 (t,  $J = 30.3$  Hz), 144.6, 126.9, 124.34, 123.2, 118.3 (tt,  $J = 251.9, 31.7$  Hz), 109.6 (tt,  $J = 261.3, 37.0$  Hz), 63.9, 31.4, 30.4 (t,  $J = 22.4$  Hz), 29.6, 20.0 (t,  $J = 3.8$  Hz), 13.9.

$^{19}\text{F}$  NMR (282 MHz, Chloroform-*d*)  $\delta$  -115.52 (t,  $J = 18.9$  Hz, 2F), -120.85 (s, 2F).

HRMS (ESI): calcd for  $\text{C}_{13}\text{H}_{16}\text{F}_4\text{O}_2\text{SNa}$  ( $\text{M}+\text{Na}$ ) 335.0699, found 335.0693.



**Ethyl 2,2,3,3-tetrafluoro-7-phenylheptanoate (4r)**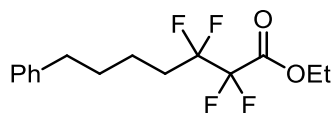

Yield 130 mg (85%). Colorless oil. Chromatography: hexanes/EtOAc, 25/1.

$^1\text{H}$  NMR (300 MHz, Chloroform-*d*)  $\delta$  7.38 – 7.27 (m, 2H), 7.27 – 7.14 (m, 3H), 4.41 (q,  $J = 7.2$  Hz, 2H), 2.68 (t,  $J = 7.2$  Hz, 2H), 2.23 – 1.99 (m, 2H), 1.82 – 1.58 (m, 4H), 1.39 (t,  $J = 7.2$  Hz, 3H).

$^{13}\text{C}\{^1\text{H}\}$  NMR (75 MHz, Chloroform-*d*)  $\delta$  160.7 (t,  $J = 30.4$  Hz), 141.9, 128.49, 128.47, 126.0, 118.3 (tt,  $J = 251.7, 31.7$  Hz), 109.4 (tt,  $J = 261.4, 261.3, 37.0$  Hz), 63.9, 35.7, 31.1, 30.5 (t,  $J = 22.4$  Hz), 20.1 (t,  $J = 3.8$  Hz), 13.9.

$^{19}\text{F}$  NMR (282 MHz, Chloroform-*d*)  $\delta$  -115.54 (t,  $J = 19.0$  Hz, 2F), -120.88 (s, 2F).

HRMS (ESI): calcd for  $\text{C}_{15}\text{H}_{18}\text{F}_4\text{O}_2\text{Na}$  ( $\text{M}+\text{Na}$ ) 329.1135, found 329.1134.

**Ethyl 2,2,3,3-tetrafluoro-3-(2-methylcyclohexyl)propanoate (4s)**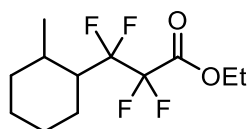

Modified General procedure B: 1.25 mmol of fluoroalkylchloride was used, irradiation time 10 hours. Yield 96 mg (71%). Colorless oil. Chromatography: hexanes/EtOAc, 35/1.

Mixture of isomers, 7.9:1.

$^1\text{H}$  NMR (300 MHz, Chloroform-*d*)  $\delta$  4.38 (q,  $J = 7.1$  Hz, 2H), 2.39 – 2.12 (m, 1H), 1.90 – 1.15 (m, 12H), 1.03 (dt,  $J = 7.0, 1.7$  Hz, 3H).

$^{13}\text{C}$  NMR (75 MHz, Chloroform-*d*), major isomer:  $\delta$  160.89 (t,  $J = 30.4$  Hz), 123.23 – 105.96 (m), 63.74, 42.58 (t,  $J = 20.1$  Hz), 33.78, 27.14 (t,  $J = 3.3$  Hz), 26.04, 19.84, 19.24 (dd,  $J = 4.9, 2.7$  Hz), 13.93, 13.53; minor isomer:  $\delta$  47.31 (t,  $J = 19.6$  Hz), 36.06, 31.95, 29.84, 25.51, 25.44, 21.55 (dd,  $J = 5.5, 1.1$  Hz).

$^{19}\text{F}$  NMR (282 MHz, Chloroform-*d*), major isomer:  $\delta$  -113.76 (ddd,  $J = 276.6, 20.9, 7.4$  Hz), -117.71 (dm,  $J = 275.8$  Hz), -118.74 (dt,  $J = 267.0, 6.4$  Hz), -119.71 (dd,  $J = 267.2, 6.6$  Hz); minor isomer:  $\delta$  -103.17 (d,  $J = 279.0$  Hz), -116.45 (ddt,  $J = 278.6, 19.9, 9.8$  Hz), -115.72 (dt,  $J = 268.4, 9.7$  Hz), -119.57 (dd,  $J = 268.6, 10.9$  Hz).

HRMS (ESI): calcd for  $\text{C}_{12}\text{H}_{18}\text{F}_4\text{O}_2\text{Na}$  ( $\text{M}+\text{Na}$ ) 293.1135, found 293.1134.

**Ethyl 2,2,3,3-tetrafluoro-4,4,5-trimethylhexanoate (4t)**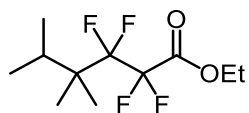

Modified General procedure B: amount of methylpropane-2-thiol (12  $\mu\text{L}$ , 0.1 mmol), irradiation time 10 hours.

Yield 45 mg (35%). Colorless oil. Chromatography: DCM/pentane, 30/1.

$^1\text{H}$  NMR (300 MHz, Chloroform-*d*)  $\delta$  4.38 (q,  $J = 7.1$  Hz, 2H), 2.05 (hept,  $J = 6.8$  Hz, 1H), 1.37 (t,  $J = 7.1$  Hz, 3H), 1.09 (s, 6H), 0.95 (d,  $J = 6.8$  Hz, 6H).

$^{13}\text{C}$  NMR (76 MHz, Chloroform-*d*)  $\delta$  161.2 (t,  $J = 30.8$  Hz), 120.7 (tt,  $J = 258.6, 31.3$  Hz), 112.0 (tt,  $J = 264.1, 41.7$  Hz), 63.8, 44.2 (tt,  $J = 18.6, 2.0$  Hz), 32.4 (p,  $J = 2.0$  Hz), 18.8 (tt,  $J = 5.4, 2.8$  Hz), 18.6 (t,  $J = 2.7$  Hz), 14.0.

$^{19}\text{F}$  NMR (282 MHz, Chloroform-*d*)  $\delta$  -110.31 – -110.37 (m, 2F), -114.59 – -114.66 (m, 2F).

HRMS (ESI): calcd for  $\text{C}_{11}\text{H}_9\text{F}_4\text{O}_2\text{Na}$  ( $\text{M}+\text{Na}$ ) 281.1135, found 281.1144.

**Methyl 2,2-difluoro-6-phenylhexanoate (5a)**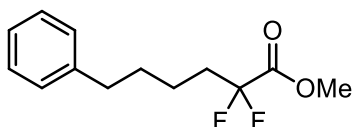

Modified General procedure B: irradiation time 10 hours.

Yield 105 mg (87%). Colorless oil. Chromatography: hexanes/EtOAc, 20/1.

$^1\text{H}$  NMR (300 MHz, Chloroform-*d*)  $\delta$  7.39 – 7.27 (m, 2H), 7.27 – 7.15 (m, 3H), 3.87 (s, 3H), 2.72 – 2.61 (m, 2H), 2.24 – 2.02 (m, 2H), 1.80 – 1.64 (m, 2H), 1.69 – 1.47 (m, 2H).

$^{13}\text{C}\{^1\text{H}\}$  NMR (75 MHz, Chloroform-*d*)  $\delta$  164.9 (t,  $J = 33.3$  Hz), 141.9, 128.5, 126.0, 116.5 (t,  $J = 250.0$  Hz), 53.3, 35.6, 34.5 (t,  $J = 23.2$  Hz), 30.9, 21.2 (t,  $J = 4.3$  Hz).

$^{19}\text{F}$  NMR (282 MHz, Chloroform-*d*)  $\delta$  -106.35 (t,  $J = 16.9$  Hz).

HRMS (ESI): calcd for  $\text{C}_{13}\text{H}_{16}\text{F}_2\text{O}_2\text{Na}$  ( $\text{M}+\text{Na}$ ) 265.1011, found 265.1008.

**2,2-Difluoro-1-morpholino-6-phenylhexan-1-one (5b)**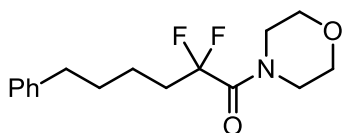

Modified General procedure B: irradiation time 10 hours.

Yield 128 mg (86%). Colorless oil. Chromatography: hexanes/EtOAc, 4/1.

$^1\text{H}$  NMR (300 MHz, Chloroform-*d*)  $\delta$  7.42 – 7.15 (m, 5H), 3.82 – 3.66 (m, 8H), 2.72 (t,  $J = 7.5$  Hz, 2H), 2.25 (tt,  $J = 17.9, 7.8$  Hz, 2H), 1.89 – 1.56 (m, 4H).

$^{13}\text{C}$  NMR (75 MHz, Chloroform-*d*)  $\delta$  162.2 (t,  $J = 29.8$  Hz), 142.2, 128.42, 128.37, 125.8, 119.6 (t,  $J = 253.9$  Hz), 66.84, 66.77, 46.6 (t,  $J = 6.4$  Hz), 43.4, 35.7, 34.5 (t,  $J = 22.9$  Hz), 31.2, 21.2 (t,  $J = 4.6$  Hz).

$^{19}\text{F}$  NMR (282 MHz, Chloroform-*d*)  $\delta$  -100.20 (t,  $J = 18.4$  Hz).

HRMS (ESI): calcd for  $\text{C}_{16}\text{H}_{21}\text{F}_2\text{NO}_2\text{Na}$  ( $\text{M}+\text{Na}$ ) 320.1433, found 320.1423.

**Ethyl 2,2,3,3,4,4,5,5-octafluoro-9-phenylnonanoate (5c)**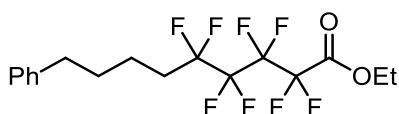

Yield 179 mg (88%). Colorless oil. Chromatography: hexanes/EtOAc, 30/1.

$^1\text{H}$  NMR (300 MHz, Chloroform-*d*)  $\delta$  7.39 – 7.28 (m, 2H), 7.28 – 7.17 (m, 3H), 4.44 (q,  $J = 7.2$  Hz, 2H), 2.69 (t,  $J = 7.2$  Hz, 2H), 2.23 – 1.99 (m, 2H), 1.83 – 1.65 (m, 4H), 1.40 (t,  $J = 7.2$  Hz, 3H).

$^{13}\text{C}\{^1\text{H}\}$  NMR (75 MHz, Chloroform-*d*)  $\delta$  159.0 (t,  $J = 29.5$  Hz), 141.9, 128.53, 128.48, 126.1, 118.5 (tt,  $J = 254.3, 30.9$  Hz), 111.4 (ttt,  $J = 264.5, 34.3, 30.7$  Hz), 111.0 (ttt,  $J = 266.8, 34.3, 30.7$  Hz), 108.3 (tt,  $J = 266.7, 32.2$  Hz), 64.5, 35.7, 31.0, 30.9 (t,  $J = 22.4$  Hz), 20.0 (t,  $J = 3.8$  Hz), 13.7.

$^{19}\text{F}$  NMR (282 MHz, Chloroform-*d*)  $\delta$  -115.22 (p,  $J = 16.8$  Hz, 2F), -119.71 (t,  $J = 11.6$  Hz, 2F), -123.62 (s, 2F), -124.35 (s, 2F).

HRMS (ESI): calcd for  $\text{C}_{17}\text{H}_{18}\text{F}_8\text{O}_2\text{Na}$  ( $\text{M}+\text{Na}$ ) 429.1071, found 429.1054.

**6,6,7,7,8,8,9,9,10,10,11,11,11-tridecafluoroundecanoic acid (5d)**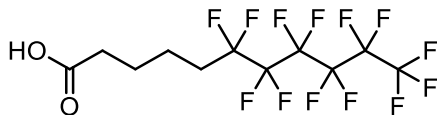

Modified General procedure B: 2,4,6-trimethylpyridine (73  $\mu$ L, 0.55 mmol) was added before the irradiation. After irradiation, the reaction was quenched with 3 mL of 2M hydrochloric acid.

Yield 183 mg (87%). Pale-green solid. Mp 55-57  $^{\circ}$ C. Chromatography: DCM/i-PrOH, 12/1.

$^1$ H NMR (300 MHz, Chloroform-*d*)  $\delta$  11.78 (s, 1H), 2.41 (t,  $J$  = 6.8 Hz, 2H), 2.20 – 1.92 (m, 2H), 1.82 – 1.66 (m, 4H).

$^{13}$ C NMR (75 MHz, Chloroform-*d*)  $\delta$  180.90, 124.3 – 104.0 (m), 33.8, 30.8 (t,  $J$  = 22.5 Hz), 24.2, 19.9 (t,  $J$  = 4.1 Hz).

$^{19}$ F NMR (282 MHz, Chloroform-*d*)  $\delta$  -82.13 (t,  $J$  = 10.9 Hz, 3F), -115.50 (p,  $J$  = 17.0 Hz, 2F), -123.01 (s, 2F), -123.98 (s, 2F), -124.67 (s, 2F), -127.31 (t,  $J$  = 16.0 Hz, 2F).

HRMS (ESI): calcd for C<sub>11</sub>H<sub>9</sub>F<sub>13</sub>O<sub>2</sub>Na (M+Na) 443.0287, found 443.0287.

**(5,5,6,6,7,7,8,8,9,9,10,10,10-Tridecafluorodecyl)benzene (5e)**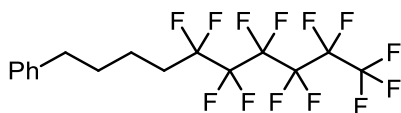

Yield 199 mg (88%). Colorless oil. Chromatography: hexanes.

$^1$ H NMR (300 MHz, Chloroform-*d*)  $\delta$  7.40 – 7.19 (m, 5H), 2.71 (t,  $J$  = 7.1 Hz, 2H), 2.24 – 2.01 (m, 2H), 1.85 – 1.62 (m, 4H).

$^{13}$ C NMR (75 MHz, Chloroform-*d*)  $\delta$  141.9, 128.6, 128.5, 126.2, 124.1 – 103.3 (m), 35.7, 31.1, 31.0 (t,  $J$  = 22.4 Hz), 20.0 (t,  $J$  = 3.7 Hz).

$^{19}$ F NMR (282 MHz, Chloroform-*d*)  $\delta$  -81.87 (t,  $J$  = 10.4 Hz, 3F), -115.28 (p,  $J$  = 17.0 Hz, 2F), -122.82 (t,  $J$  = 14.8 Hz, 2F), -123.79, -124.49 (t,  $J$  = 16.0 Hz, 2F), -127.10 (t,  $J$  = 16.0 Hz, 2F).

HRMS (ESI): calcd for C<sub>16</sub>H<sub>13</sub>F<sub>13</sub>Na (M+Na) 475.0702, found 475.0711.

**(5,5-Dichloropentyl)benzene (5f)**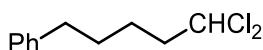

Modified General procedure B: amounts of the reagents **N1** (194 mg, 1.5 mmol) and 4CzIPN (4 mg, 0.005 mmol); irradiation time 10 hours.

Yield 73 mg (67%). Colorless oil. Chromatography: hexanes. Compare to the general procedure,

$^1$ H NMR (300 MHz, Chloroform-*d*)  $\delta$  7.37 – 7.27 (m, 2H), 7.26 – 7.17 (m, 3H), 5.76 (t,  $J$  = 6.1 Hz, 1H), 2.67 (t,  $J$  = 7.3 Hz, 2H), 2.33 – 2.19 (m, 2H), 1.79 – 1.54 (m, 4H).

$^{13}$ C NMR (75 MHz, Chloroform-*d*)  $\delta$  142.1, 128.5, 128.5, 126.0, 73.6, 43.6, 35.8, 30.5, 25.7.

**Gram-scale synthesis of (5-chloro-5,5-difluoropentyl)benzene (3a).**

A 100 mL thick wall screw-cap glass flask was evacuated and filled with argon. Then, acetonitrile (20 mL), triazinane **N1** (5.16 g, 40 mmol), 4-phenylbut-1-ene (2.64 g, 20 mmol), 4CzIPN (40 mg, 0.05 mmol), and 2-methylpropane-2-thiol (240  $\mu$ L, 2 mmol) were added. The flask was placed into the dish-shaped Dewar vessel and cooled to  $-40$   $^{\circ}$ C (acetone/liq. nitrogen), and gaseous dichlorodifluoromethane (*ca.* 1.44 L, 60 mmol) was gradually injected into the frozen mixture via a syringe (the syringe needle was inserted into the reaction mixture). Then, the tube was screw-capped, placed into a beaker, cooled with water flow at room temperature, and irradiated for 5 h with a 455 nm 30 W

LED matrix placed under the bottom of the beaker. The reaction was quenched with water (10 mL) and extracted with hexane (3×6 mL). The combined organic phases were filtered through a short pad of Na<sub>2</sub>SO<sub>4</sub> and concentrated on a rotary evaporator. The residue was distilled under vacuum using a Hickmann distilling head. Boiling point 65–73 °C (bath temperature) at 0.6 Torr. Yield 3.41 g (78%).

#### Gram-scale synthesis of methyl 2,2-difluoro-6-phenylhexanoate (5a).

A 50 mL flat-bottom flask was flushed with argon using a crooked needle. Then, acetonitrile (10 mL), triazinane **N1** (2.58g, 420 mmol), 4-phenylbut-1-ene (1.32 g, 10 mmol), 4CzIPN (20 mg, 0.025 mmol), methyl 2-chloro-2,2-difluoroacetate (1.86 mL, 17.5 mmol) and 2-methylpropane-2-thiol (120µL, 1 mmol) were added. The flask was closed with a stopper, placed into a beaker, cooled with water flow at room temperature, and irradiated for 3 h with a 455 nm 30 W LED matrix placed under the bottom of the beaker. The reaction was quenched with water (10 mL) and extracted with hexane (3×6 mL). The combined organic phases were filtered through a short pad of Na<sub>2</sub>SO<sub>4</sub> and concentrated on a rotary evaporator. The residue was distilled under vacuum using a Hickmann distilling head. Boiling point 133–143 °C (bath temperature) at 1.7 Torr. Yield 1.94 g (80%).

#### Synthesis of 2,2-difluoro-6-phenylhexan-1-ol (6)

Methyl 2,2-difluoro-6-phenylhexanoate (242 mg, 1 mmol) and methanol (44 µL) were added dropwise to a stirring suspension of sodium borohydride (32 mg, 0.85 mmol) in diethyl ether (0.75 mL). After refluxing in water bath for 3 hours, the reaction tube was immersed into an ice/water bath and quenched with 1 mL of 4M HCl solution. The organic layer was separated, and the aqueous layer was extracted with hexane (4×2 mL). The combined organic phases were filtered through a short pad of Na<sub>2</sub>SO<sub>4</sub> and concentrated on a rotary evaporator. The residue was purified by column chromatography (hexanes/EtOAc, 3/1). Colorless oil. Yield 184 mg (86%)

<sup>1</sup>H NMR (300 MHz, Chloroform-*d*) δ 7.27 – 7.17 (m, 2H), 7.17 – 7.07 (m, 3H), 3.63 (td, *J* = 12.9, 5.5 Hz, 2H), 2.57 (t, *J* = 7.5 Hz, 2H), 2.45 – 2.02 (m, 1H), 1.98 – 1.75 (m, 2H), 1.68 – 1.56 (m, 2H), 1.60 – 1.43 (m, 2H).

<sup>13</sup>C NMR (75 MHz, Chloroform-*d*) δ 142.18, 128.43, 128.41, 125.87, 123.36 (t, *J* = 241.6 Hz), 63.95 (t, *J* = 31.8 Hz), 35.70, 33.15 (t, *J* = 24.0 Hz), 31.22, 21.52 (t, *J* = 4.6 Hz).

<sup>19</sup>F NMR (282 MHz, Chloroform-*d*) δ -103.92 (t, *J* = 17.9 Hz).

HRMS (ESI): calcd for C<sub>16</sub>H<sub>21</sub>F<sub>2</sub>NONa (M+Na) 304.1483, found 304.1490.

#### Synthesis of 2,2-difluoro-6-phenyl-1-(pyrrolidin-1-yl)hexan-1-one (7)

Pyrrolidine (123 µL, 1.5 mmol, 1.5 equiv) was added dropwise to a stirring solution of methyl 2,2-difluoro-6-phenylhexanoate (242 mg, 1 mmol) in methanol (1 mL). The mixture was stirred overnight at room temperature. All volatile components were evaporated under reduced pressure. The residue was purified by column chromatography (hexanes/EtOAc, 3/1). Colorless oil. Yield 239 mg (85%)

<sup>1</sup>H NMR (300 MHz, Chloroform-*d*) δ 7.40 – 7.29 (m, 2H), 7.27 – 7.14 (m, 3H), 3.73 (t, *J* = 6.8 Hz, 2H), 3.58 (t, *J* = 7.0 Hz, 2H), 2.71 (t, *J* = 7.5 Hz, 2H), 2.36 – 2.13 (m, 2H), 2.06 – 1.80 (m, 4H), 1.86 – 1.58 (m, 4H).

<sup>13</sup>C NMR (75 MHz, Chloroform-*d*) δ 162.22 (t, *J* = 30.2 Hz), 142.04, 128.28, 128.20, 125.65, 119.08 (t, *J* = 252.6 Hz), 47.21, 46.45 (t, *J* = 6.4 Hz), 35.55, 34.07 (t, *J* = 23.2 Hz), 31.04, 26.39 (t, *J* = 1.8 Hz), 23.15, 21.17 (t, *J* = 4.5 Hz).

<sup>19</sup>F NMR (282 MHz, Chloroform-*d*) δ -109.08 (p, *J* = 15.0 Hz).

HRMS (ESI): calcd for C<sub>12</sub>H<sub>16</sub>F<sub>2</sub>ONa (M+Na) 237.1061, found 237.1062.

**2,2-Difluoro-6-phenylhexyl benzoate (5g)**<sup>29</sup>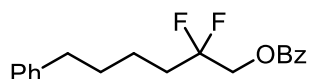

Prepared from 4-phenyl-1-butene (**1a**) and 2-bromo-2,2-difluoroethyl benzoate (**8**)<sup>30</sup> (1.75 equiv) according to General Procedure B.

Yield 131 mg (82%). Colorless oil. Chromatography: hexanes/EtOAc, 8/1.

<sup>1</sup>H NMR (300 MHz, CDCl<sub>3</sub>) δ 8.12 – 8.03 (m, 2H), 7.62 (t, *J* = 7.4 Hz, 1H), 7.48 (t, *J* = 7.6 Hz, 2H), 7.34 – 7.25 (m, 2H), 7.24 – 7.14 (m, 3H), 4.49 (t, *J* = 12.4 Hz, 2H), 2.66 (t, *J* = 7.4 Hz, 2H), 2.14 – 1.91 (m, 2H), 1.80 – 1.54 (m, 4H).

<sup>13</sup>C NMR (75 MHz, CDCl<sub>3</sub>) δ 165.7, 142.1, 133.6, 130.0, 129.3, 128.7, 128.5, 126.0, 121.9 (t, *J* = 242.0 Hz), 64.3 (t, *J* = 34.0 Hz), 35.8, 34.1 (t, *J* = 23.8 Hz), 31.2, 21.5 (t, *J* = 4.5 Hz).

<sup>19</sup>F NMR (282 MHz, CDCl<sub>3</sub>) δ -106.06 (p, *J* = 15.0 Hz).

**6,6-Difluoro-10-phenyldecan-1-ol (10)**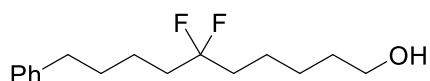

A test tube was evacuated and filled with argon. Then, acetonitrile (1 mL), triazinane **N1** (129 mg, 1 mmol), pent-4-en-1-ol (43 mg, 0.5 mmol), compound **3a** (191 mg, 0.875 mmol), 2-methylpropane-2-thiol (6 μL, 0.05 mmol), 3DPA2FBN (3.2 mg, 0.005 mmol) were added. The tube was screw-capped and irradiated with 400 nm (60W) matrix for 15 hours. The reaction was quenched with water (5 mL) and extracted with hexane (3×1.5 mL). The combined organic phases were filtered through a short pad of Na<sub>2</sub>SO<sub>4</sub> and concentrated on a rotary evaporator. The residue was purified by column chromatography (hexanes/EtOAc, 3/1). Yield 64 mg (47%). Pale-yellow oil. According to <sup>1</sup>H NMR, <sup>13</sup>C NMR and HRMS data, the compound contains ca. 15% of impurity, which can be ascribed to the alkene hydrothiolation product 5-(*tert*-butylthio)pentan-1-ol.

<sup>1</sup>H NMR (300 MHz, CDCl<sub>3</sub>) δ 7.29 – 7.18 (m, 2H), 7.18 – 7.07 (m, 3H), 3.60 (t, *J* = 6.4 Hz, 2H), 2.59 (t, *J* = 7.6 Hz, 2H), 1.89 – 1.29 (m, 15H); impurity: δ 2.50 (t, *J* = 7.2 Hz), 1.28 (s).

<sup>13</sup>C NMR (75 MHz, CDCl<sub>3</sub>) δ 142.3, 128.50, 128.47, 125.9, 125.3 (t, *J* = 240.5 Hz), 62.8, 36.43 (t, *J* = 25.5 Hz), 36.36 (t, *J* = 25.6 Hz), 35.8, 32.6, 31.3, 25.7, 22.3 (t, *J* = 4.8 Hz), 22.2 (t, *J* = 4.7 Hz); impurity: δ 62.9, 32.5, 31.1, 29.8, 28.4, 25.5.

<sup>19</sup>F NMR (282 MHz, CDCl<sub>3</sub>) δ -98.57 (p, *J* = 16.7 Hz).

HRMS (ESI): calcd for C<sub>16</sub>H<sub>24</sub>F<sub>2</sub>ONa (M+Na) 293.1687, found 293.1687; calcd for C<sub>9</sub>H<sub>20</sub>OS<sup>107</sup>Ag (M+Ag) 283.0280, found 283.0282.

## Mechanistic studies

### A. Radical clock experiment

#### Dimethyl 3-(2-chloro-2,2-difluoroethyl)-4-methylcyclopentane-1,1-dicarboxylate (**11**)

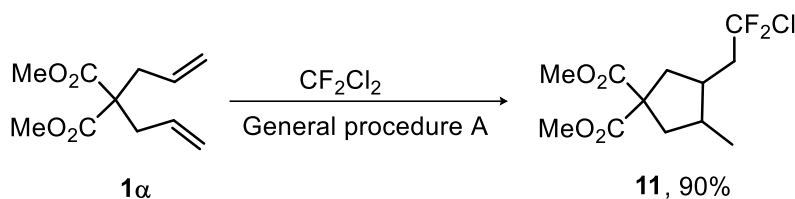

Following the General procedure A, the cyclized product was obtained in 90 % yield (134 mg). Colorless oil. Chromatography: hexanes/EtOAc, 10/1.

Mixture of isomers, 8.3:1.

$^1\text{H}$  NMR (300 MHz, Chloroform-*d*), major isomer:  $\delta$  3.71 (s, 6H), 2.56 – 2.18 (m, 6H), 2.18 – 1.97 (m, 2H), 0.85 (d,  $J$  = 6.9 Hz, 3H); minor isomer:  $\delta$  1.01 (d,  $J$  = 6.2 Hz).

$^{13}\text{C}$  NMR (75 MHz, Chloroform-*d*), major isomer:  $\delta$  173.11, 173.06, 130.9 (t,  $J$  = 292.4 Hz), 58.6, 53.0, 52.9, 42.2 (t,  $J$  = 23.7 Hz), 41.4, 38.2, 37.8 (t,  $J$  = 2.0 Hz), 36.1, 15.1; minor isomer:  $\delta$  45.6 (t,  $J$  = 23.6 Hz), 40.5, 39.9, 31.0, 17.3.

$^{19}\text{F}$  NMR (282 MHz, Chloroform-*d*)  $\delta$  -49.37 (dt,  $J$  = 160.4, 12.4 Hz, 1F), -50.56 (dt,  $J$  = 160.4, 13.5 Hz, 1F).

HRMS (ESI): calcd for  $\text{C}_{12}\text{H}_{17}^{35}\text{ClF}_2\text{O}_4\text{Na}$  ( $\text{M}+\text{Na}$ ) 321.0676, found 321.0673.

### B. Isolation of iminium salt

#### 1,3,5-Trimethyl-2,3,4,5-tetrahydro-1,3,5-triazin-1-ium chloride (**12**)<sup>31</sup>

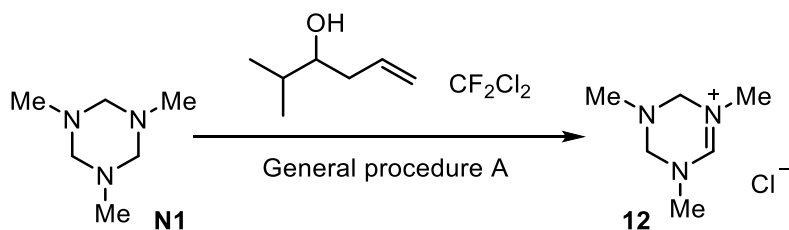

The reaction was performed according to the General procedure A using 2-methylhex-5-en-3-ol. After irradiation, the mixture was diluted with 2 mL of methyl *tert*-butyl ether, then the precipitate was separated from solution by centrifugation, washed with methyl *tert*-butyl ether (3×1 mL), and dried under vacuum to obtain white powder (160 mg, yield 98%). Mp 199-200 °C.

$^1\text{H}$  NMR (300 MHz, Chloroform-*d*)  $\delta$  9.66 (s, 1H), 4.21 (s, 4H), 3.22 (s, 6H), 2.49 (s, 3H).

$^{13}\text{C}$  NMR (75 MHz, Chloroform-*d*)  $\delta$  154.2, 66.9, 40.23, 39.5.

### Stern-Volmer study

Experiments were performed in a screw-capped quartz vial (10×10 mm). The solvent was degassed, and the vial was filled with argon. The concentration of 4CzIPN was 0.1 mmol/L. Excitation wavelength 435 nm, fluorescence wavelength 548 nm. Measurements were performed at room temperature.

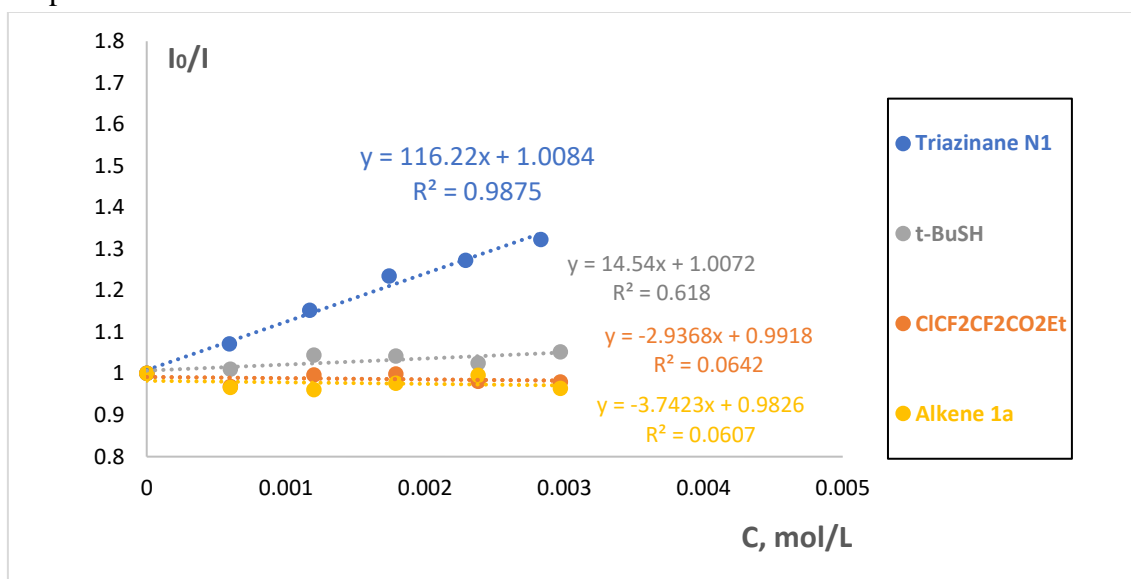

### C. Quantum yield measurement

Quantum yield for the reaction of 4-phenyl-1-butene (**1a**) with Cl(CF<sub>2</sub>)<sub>2</sub>CO<sub>2</sub>Et was estimated using irradiation with a 870 mW purple LED strip (400 nm), setup and reaction tube were used as for the reactions in General procedures A and B. Photon flux of the LED strip was measured by standard ferrioxalate actinometry – 11,203 μEs/min. A mixture of **1a** (66 mg, 0.5 mmol), triazinane **N1** (129 mg, 1 mmol), Cl(CF<sub>2</sub>)<sub>2</sub>CO<sub>2</sub>Et (144 mg, 0.875 mmol), 4CzIPN (2 mg, 5 μmol) and 37 mg of tetralin (internal standard) in acetonitrile (1 mL) was placed in a reaction tube. At 400 nm, the reaction mixture completely absorbs the laser light. The tube was irradiated for 60 minutes, and every 10 minutes the mixture was analyzed by GC. The quantum yield  $\Phi$  was calculated by the following equation:

$$\phi = \frac{\text{conversion}(\%) \cdot n_0(\mathbf{1a})}{t \cdot \text{photon flux} \cdot 100\%} = \frac{0,996 \cdot 0,5 \cdot 10^{-3}}{1 \cdot 11,203 \cdot 10^{-6} \cdot 100} = 0,44$$

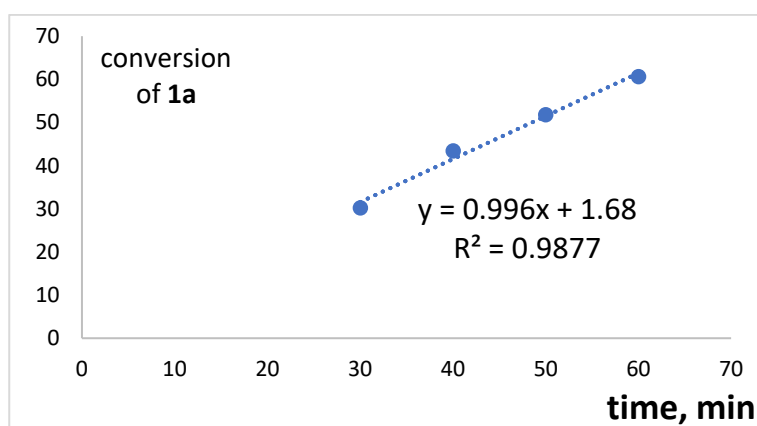

## Quantum chemical calculations

### General

Calculations were carried out using the Gaussian09 package<sup>32</sup> using uwB97XD/def2svp method. For calculations in solution, CPCM model<sup>33,34</sup> (acetonitrile) was used.

All stationary points were verified by vibrational analysis; Gibbs free energies from the frequency calculations with the CPCM model were used uncorrected. Transition states were subjected to IRC calculations in forward and reverse directions.

NBO analysis<sup>35</sup> was used to analyze interactions via second-order perturbation theory; for open-shell systems, \$CHOOSE keylist was used with LONE and BOND specifications for both alpha and beta spins.

### Discussion

For reactions of amino-substituted radicals **T5**, **T3** and **T1**, the reaction paths from TS to reagents and products were analyzed.

On potential energy surfaces, pre-activation complexes were identified with very long C...Cl bond (2.95 – 3.0 Å) with virtually unperturbed geometries of amino-alkyl radicals and CF<sub>2</sub>Cl<sub>2</sub>. However, these complexes were not the minima on Gibbs free energy surfaces (Figures S1).

Optimization of final adducts in acetonitrile solution for reactions of **T3** and **T1** was problematic, resulting in dissociation of the C-Cl bond and formation of iminium ions (this is the same as was observed in the literature<sup>36,37</sup>). Correspondingly, for direct comparison, iminium ions were calculated to allow the direct comparison of reactions of **T5**, **T3** and **T1**.

**Figure S1.** Gibbs free energy (G) and potential energy (E) surfaces, in kcal/mol.

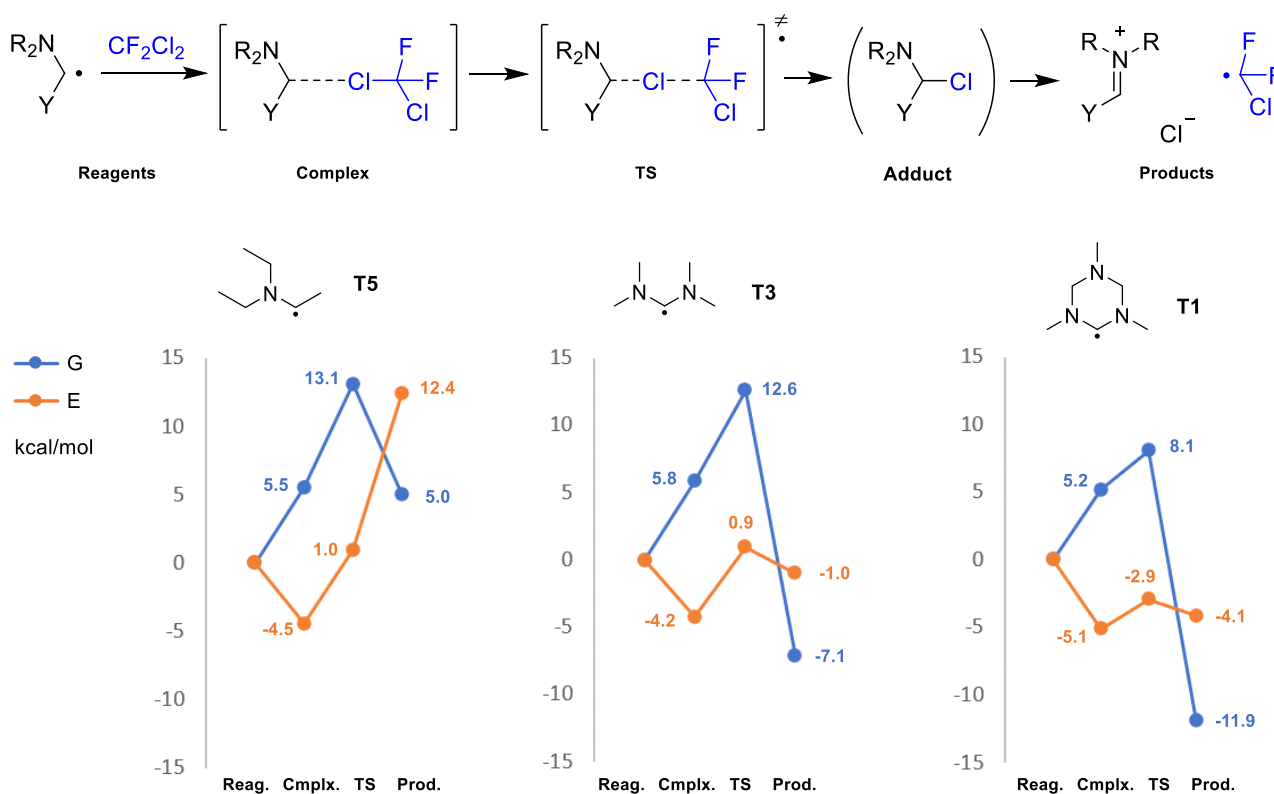



For radical **T3**, the rotation around the C-N bonds was evaluated. Relaxed potential energy scan was performed by variation of the dihedral angle C3 N18 N17 C1 (Figure S1, Table S1). Energies of interactions of nitrogen lone pairs with the adjacent carbon orbital derived from second order perturbation theory analysis are given (Figure S2, Table S1). For NBO calculations, \$CHOOSE keylist was used with specifications: LONE for nitrogens and central carbon; BOND (S) for all single bonds.

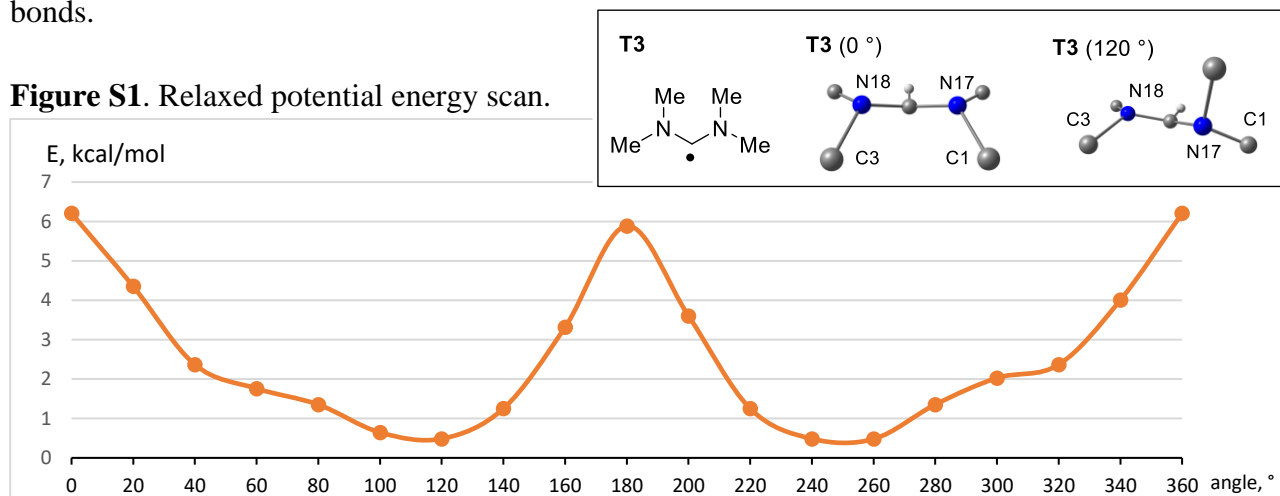

**Figure S2.**

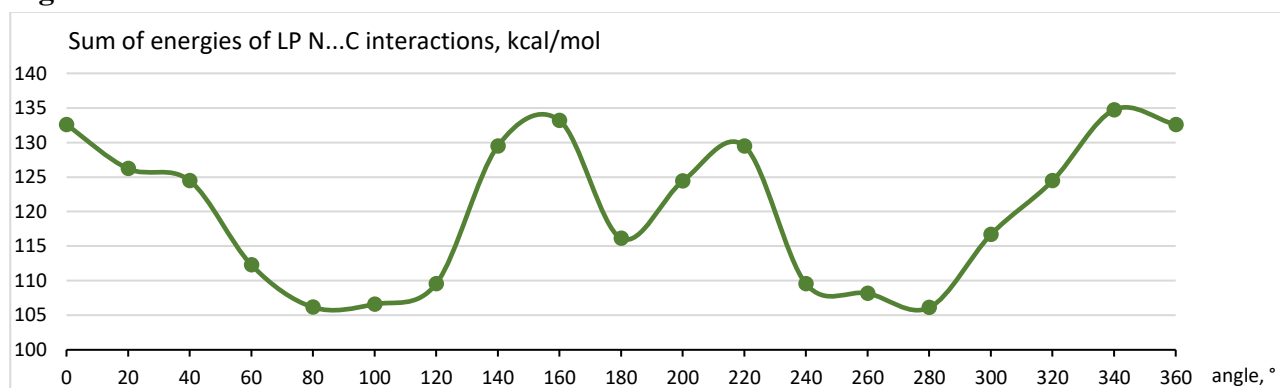

**Table S1.** Energies of conformers, and energies obtained from NBO analysis.

| Angle, °                       | $E,^a$ kcal/mol | $E, \text{a.u.}$    | Energy (kcal/mol)<br>LP (N18)...LP*(C2) | Energy (kcal/mol)<br>LP (N17)...LP*(C2) | Sum of lone pair<br>interactions, kcal/mol |
|--------------------------------|-----------------|---------------------|-----------------------------------------|-----------------------------------------|--------------------------------------------|
| 0                              | 5.8             | -307.4636585        | 65.7                                    | 66.9                                    | 132.6                                      |
| 20                             | 3.9             | -307.4666111        | 77.5                                    | 48.7                                    | 126.2                                      |
| 40                             | 1.9             | -307.4697777        | 91.1                                    | 33.3                                    | 124.5                                      |
| 60                             | 1.3             | -307.4707451        | 104.2                                   | 8.1                                     | 112.3                                      |
| 80                             | 0.9             | -307.4713916        | 104.8                                   | 1.4                                     | 106.2                                      |
| 100                            | 0.2             | -307.4725205        | 97.5                                    | 9.1                                     | 106.6                                      |
| 120                            | 0.0             | -307.4727755        | 92.8                                    | 16.8                                    | 109.6                                      |
| 140                            | 0.8             | -307.4715545        | 89.3                                    | 40.2                                    | 129.5                                      |
| 160                            | 2.9             | -307.4682631        | 86.3                                    | 46.9                                    | 133.2                                      |
| 180                            | 5.4             | -307.4641652        | 46.8                                    | 69.3                                    | 116.1                                      |
| 200                            | 3.2             | -307.4678062        | 44.4                                    | 80.0                                    | 124.4                                      |
| 220                            | 0.8             | -307.4715545        | 40.3                                    | 89.2                                    | 129.5                                      |
| 240                            | 0.0             | -307.4727755        | 16.7                                    | 92.8                                    | 109.6                                      |
| 260                            | 0.0             | -307.4727859        | 13.0                                    | 95.2                                    | 108.2                                      |
| 280                            | 0.9             | -307.4713916        | 1.4                                     | 104.7                                   | 106.1                                      |
| 300                            | 1.6             | -307.4703166        | 15.3                                    | 101.4                                   | 116.7                                      |
| 320                            | 1.9             | -307.4697777        | 33.4                                    | 91.1                                    | 124.5                                      |
| 340                            | 3.6             | -307.4671631        | 35.5                                    | 99.2                                    | 134.7                                      |
| 360                            | 5.8             | -307.4636585        | 65.7                                    | 66.9                                    | 132.6                                      |
| Optimized structure, <b>T3</b> |                 |                     |                                         |                                         |                                            |
| 114                            | <b>0.0</b>      | <b>-307.4728318</b> | 93.9                                    | 14.6                                    | 108.5                                      |

<sup>a</sup>Energies of conformers are given relative to that of the optimized structure **T3**.

## NBO analysis

To evaluate interaction of nitrogen lone pair(s) with the adjacent carbon orbital NBO analysis was performed. For optimized geometries, \$CHOOSE keylist was used with specifications (using pop=nboread keyword): LONE for nitrogen and carbon; BOND (S) for all single bonds. Energies obtained from second order perturbation theory analysis are summarized in Table S2.

**Table S2.** Energies of N...C interactions, in kcal/mol

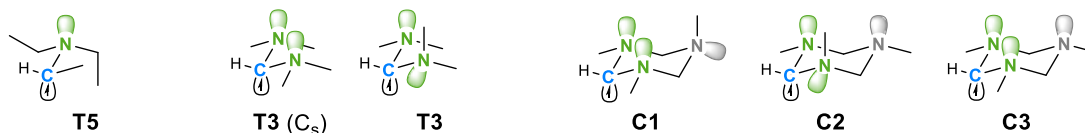

| Structure                             | Energy<br>LP (N1)...LP*(C) | Energy<br>LP (N2)...LP*(C) | Sum of lone pair<br>interactions |
|---------------------------------------|----------------------------|----------------------------|----------------------------------|
| <b>T5</b>                             | 104.7                      | -                          | <b>104.7</b>                     |
| <b>T3 (C<sub>s</sub>)<sup>a</sup></b> | 66.5                       | 66.5                       | <b>133.1</b>                     |
| <b>T3</b>                             | 93.9                       | 14.6                       | <b>108.5</b>                     |
| <b>C1</b>                             | 70.5                       | 70.5                       | <b>141.0</b>                     |
| <b>C2</b>                             | 89.2                       | 31.8                       | <b>121.1</b>                     |
| <b>C3</b>                             | 70.1                       | 70.1                       | <b>140.3</b>                     |

<sup>a</sup> Constrained with C<sub>s</sub> symmetry.

The following conclusions can be drawn concerning the nitrogen lone pair and a carbon radical:

- Triazinane conformer **C1** has the strongest stabilization by nitrogen lone pairs.
- From **T5** to **T3** interaction energy increases insignificantly.
- Interaction is maximized when nitrogen lone pair and singly occupied orbital have *anti-periplanar* arrangement – cf. **T3-C<sub>s</sub>** vs **T3**, and **C1** vs **C2**

For analysis of transition states, the following \$CHOOSE specification was used: LONE for N, C adjacent to nitrogen(s), Cl, F; BOND (S) for all single bonds and breaking C-Cl bond. This gave energies of interaction of nitrogen lone pair(s) with the adjacent carbon orbital and energies of interaction of carbon orbital with the breaking C-Cl bond. Energies are summarized in Table S3.

**Table S3.** Energies of N...C interactions, in kcal/mol

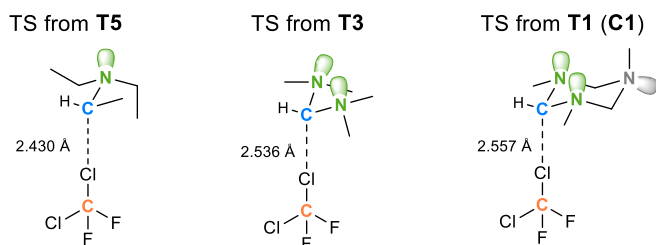

| TS                  | Energy<br>LP (N1)...LP*(C) | Energy<br>LP (N2)...LP*(C) | Sum of lone pair<br>interactions | Energy<br>LP (C) ... BD* (Cl-C) |
|---------------------|----------------------------|----------------------------|----------------------------------|---------------------------------|
| From <b>T5</b>      | 154.8                      | -                          | 154.8                            | <b>95.2</b>                     |
| From <b>T3</b>      | 113.8                      | 63.2                       | 177.0                            | <b>47.9</b>                     |
| From <b>T1 (C1)</b> | 89.2                       | 89.1                       | 178.2                            | <b>40.9</b>                     |

The following conclusions can be drawn:

- Triazinane **T1** has the strongest TS stabilization by nitrogen lone pairs.
- Lone pair interactions in transition states from **T3** and **T1** differ insignificantly.
- The interaction between the carbon singly occupied orbital with the C-Cl bond is strongest in **T5** and weakest in **T1**. This stands in accord with the bond distances of forming C...Cl bond (shown in the drawing), thereby reflecting the latest TS for **T5** and earliest TS for **T1**.

### Analysis of reactivities of conformers **C1**, **C2** and **C3** of triazinane **T1**.

Conformers **C1**, **C2** and **C3** may interconvert into each other via lone pair inversion (Figure S3). Activation energy for conversion **C1** to **C3** is 6.9 kcal/mol. The less stable **C3** conformer reacts slower (activation energy 8.3 kcal) compared to **C1** (activation energy 8.1). When attempted search for TS for the reaction of **C2**, the nitrogen lone pair inversion proceeded earlier, which is in accord with the lone pair inversion activation energy of only 2.3 kcal/mol. As a result, for the reaction of **C2**, the same TS as for that of **C3** was located.

**Figure S3.** Free energy profile of the reaction of conformers **C1-C3**. Relative energies are given with respect to **C1** (taken as 0.0). Energies are given in kcal/mol.

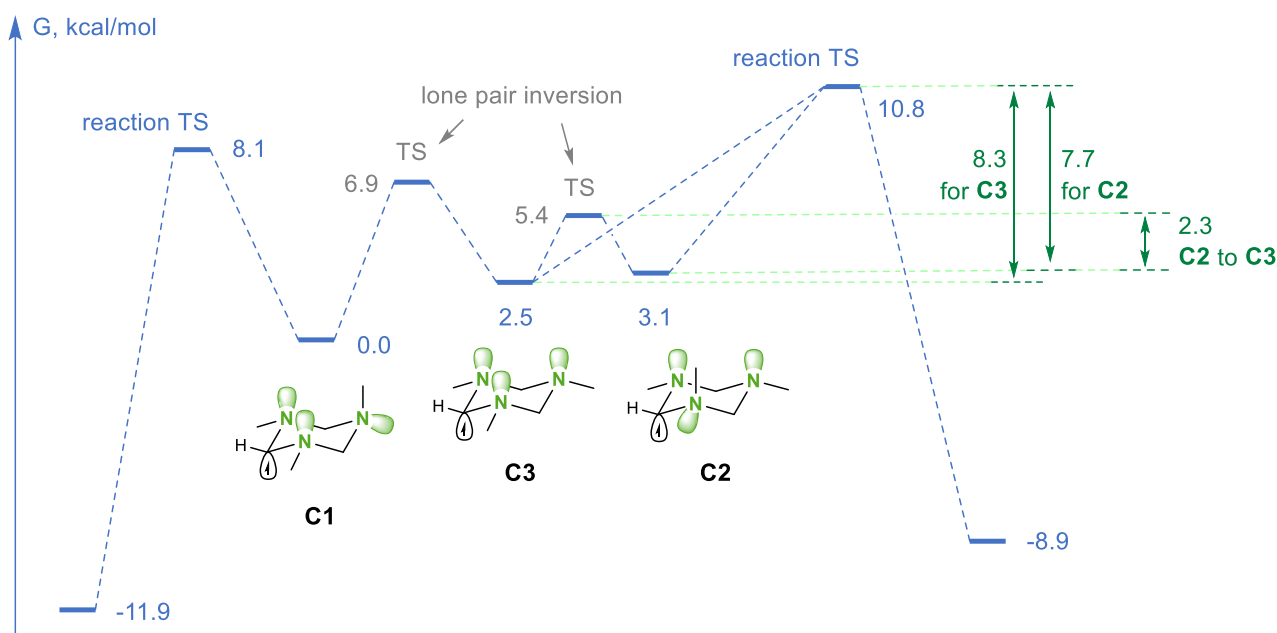

## Energies and coordinates

### CF<sub>2</sub>Cl<sub>2</sub>

#### Gas phase

|                                             |              |
|---------------------------------------------|--------------|
| SCF Done: E(RwB97XD)                        | -1157.634001 |
| Zero-point correction                       | 0.013661     |
| Thermal correction to Energy                | 0.018328     |
| Thermal correction to Enthalpy              | 0.019272     |
| Thermal correction to Gibbs Free Energy     | -0.015432    |
| Sum of electronic and zero-point Energies   | -1157.62034  |
| Sum of electronic and thermal Energies      | -1157.615673 |
| Sum of electronic and thermal Enthalpies    | -1157.614729 |
| Sum of electronic and thermal Free Energies | -1157.649433 |

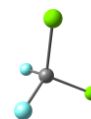

|    |              |              |              |
|----|--------------|--------------|--------------|
| 6  | -0.000287000 | 0.345473000  | 0.000000000  |
| 9  | -0.000201000 | 1.119597000  | -1.070913000 |
| 9  | -0.000200000 | 1.119595000  | 1.070915000  |
| 17 | 1.462023000  | -0.653530000 | -0.000001000 |
| 17 | -1.461710000 | -0.653857000 | 0.000000000  |

#### In MeCN

|                                             |              |
|---------------------------------------------|--------------|
| SCF Done: E(RwB97XD)                        | -1157.634714 |
| Zero-point correction                       | 0.013410     |
| Thermal correction to Energy                | 0.018096     |
| Thermal correction to Enthalpy              | 0.01904      |
| Thermal correction to Gibbs Free Energy     | -0.015692    |
| Sum of electronic and zero-point Energies   | -1157.621305 |
| Sum of electronic and thermal Energies      | -1157.616618 |
| Sum of electronic and thermal Enthalpies    | -1157.615674 |
| Sum of electronic and thermal Free Energies | -1157.650406 |

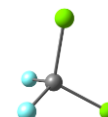

|    |              |              |              |
|----|--------------|--------------|--------------|
| 6  | -0.000287000 | 0.345473000  | 0.000000000  |
| 9  | -0.000200000 | 1.119597000  | -1.070913000 |
| 9  | -0.000199000 | 1.119595000  | 1.070915000  |
| 17 | 1.462023000  | -0.653530000 | -0.000001000 |
| 17 | -1.461710000 | -0.653856000 | 0.000000000  |

### Et<sub>2</sub>NCHMe radical (T5)

#### Gas phase

|                                             |             |
|---------------------------------------------|-------------|
| SCF Done: E(UwB97XD)                        | -291.468625 |
| Zero-point correction                       | 0.193305    |
| Thermal correction to Energy                | 0.202886    |
| Thermal correction to Enthalpy              | 0.20383     |
| Thermal correction to Gibbs Free Energy     | 0.158125    |
| Sum of electronic and zero-point Energies   | -291.27532  |
| Sum of electronic and thermal Energies      | -291.265739 |
| Sum of electronic and thermal Enthalpies    | -291.264795 |
| Sum of electronic and thermal Free Energies | -291.3105   |

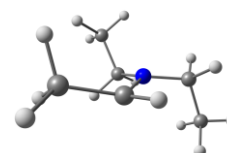

|   |              |              |              |
|---|--------------|--------------|--------------|
| 7 | -0.133093000 | -0.053150000 | -0.203693000 |
| 6 | 0.465745000  | 1.024361000  | 0.562608000  |

|   |              |              |              |
|---|--------------|--------------|--------------|
| 1 | -0.334398000 | 1.707771000  | 0.891475000  |
| 1 | 0.908904000  | 0.624647000  | 1.490015000  |
| 6 | -1.497318000 | 0.132778000  | -0.650794000 |
| 1 | -1.599954000 | 1.159891000  | -1.039745000 |
| 1 | -1.669922000 | -0.535474000 | -1.510317000 |
| 6 | 0.345220000  | -1.355214000 | -0.099003000 |
| 1 | -0.210173000 | -2.070606000 | -0.714459000 |
| 6 | 1.511264000  | 1.813362000  | -0.220518000 |
| 1 | 1.917600000  | 2.636761000  | 0.387110000  |
| 1 | 2.346376000  | 1.165853000  | -0.524566000 |
| 1 | 1.069979000  | 2.243602000  | -1.132321000 |
| 6 | -2.554626000 | -0.128452000 | 0.421747000  |
| 1 | -3.568357000 | 0.005133000  | 0.014455000  |
| 1 | -2.463574000 | -1.155526000 | 0.805228000  |
| 1 | -2.438436000 | 0.560980000  | 1.272439000  |
| 6 | 1.794886000  | -1.625789000 | 0.134233000  |
| 1 | 1.952813000  | -2.703453000 | 0.284154000  |
| 1 | 2.439718000  | -1.317130000 | -0.716207000 |
| 1 | 2.190048000  | -1.116680000 | 1.028944000  |

### In MeCN

|                                             |              |
|---------------------------------------------|--------------|
| SCF Done: E(UwB97XD)                        | -291.4706986 |
| Zero-point correction                       | 0.193004     |
| Thermal correction to Energy                | 0.202558     |
| Thermal correction to Enthalpy              | 0.203502     |
| Thermal correction to Gibbs Free Energy     | 0.158199     |
| Sum of electronic and zero-point Energies   | -291.277695  |
| Sum of electronic and thermal Energies      | -291.268141  |
| Sum of electronic and thermal Enthalpies    | -291.267197  |
| Sum of electronic and thermal Free Energies | -291.312499  |

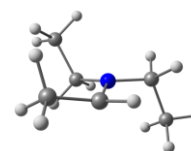

|   |              |              |              |
|---|--------------|--------------|--------------|
| 7 | -0.129944000 | -0.063516000 | -0.191895000 |
| 6 | 0.459382000  | 1.024957000  | 0.569915000  |
| 1 | -0.349544000 | 1.688557000  | 0.915916000  |
| 1 | 0.928826000  | 0.630240000  | 1.485754000  |
| 6 | -1.493473000 | 0.114850000  | -0.650545000 |
| 1 | -1.597191000 | 1.140708000  | -1.040937000 |
| 1 | -1.658276000 | -0.557447000 | -1.508176000 |
| 6 | 0.362894000  | -1.359537000 | -0.090199000 |
| 1 | -0.181891000 | -2.076217000 | -0.715152000 |
| 6 | 1.472738000  | 1.840035000  | -0.227955000 |
| 1 | 1.867311000  | 2.670544000  | 0.377274000  |
| 1 | 2.319904000  | 1.214404000  | -0.545751000 |
| 1 | 1.005993000  | 2.264563000  | -1.129913000 |
| 6 | -2.556511000 | -0.145711000 | 0.415837000  |
| 1 | -3.566173000 | -0.006497000 | 0.001031000  |
| 1 | -2.475441000 | -1.175464000 | 0.795428000  |
| 1 | -2.442721000 | 0.542379000  | 1.267905000  |
| 6 | 1.820432000  | -1.610833000 | 0.128776000  |
| 1 | 1.996103000  | -2.686979000 | 0.272048000  |
| 1 | 2.451978000  | -1.289514000 | -0.726853000 |
| 1 | 2.217960000  | -1.097227000 | 1.019726000  |

Et<sub>2</sub>NCHMe radical (T5) + CF<sub>2</sub>Cl<sub>2</sub>, transition state

## Gas phase

|                                             |              |
|---------------------------------------------|--------------|
| SCF Done: E(UwB97XD)                        | -1449.09595  |
| Zero-point correction                       | 0.208805     |
| Thermal correction to Energy                | 0.224225     |
| Thermal correction to Enthalpy              | 0.22517      |
| Thermal correction to Gibbs Free Energy     | 0.162934     |
| Sum of electronic and zero-point Energies   | -1448.887146 |
| Sum of electronic and thermal Energies      | -1448.871725 |
| Sum of electronic and thermal Enthalpies    | -1448.870781 |
| Sum of electronic and thermal Free Energies | -1448.933016 |

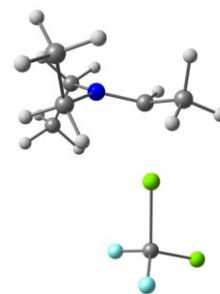

|    |              |              |              |
|----|--------------|--------------|--------------|
| 7  | 2.390743000  | 0.145430000  | -0.349846000 |
| 6  | 2.790701000  | -0.082006000 | 1.033089000  |
| 1  | 2.824539000  | 0.894401000  | 1.539058000  |
| 1  | 1.998101000  | -0.650211000 | 1.544293000  |
| 6  | 2.540338000  | 1.499126000  | -0.867978000 |
| 1  | 3.563190000  | 1.836615000  | -0.630770000 |
| 1  | 2.480859000  | 1.442892000  | -1.965442000 |
| 6  | 1.575061000  | -0.728431000 | -0.990056000 |
| 1  | 1.373453000  | -0.445295000 | -2.027346000 |
| 6  | 4.141765000  | -0.774229000 | 1.166057000  |
| 1  | 4.411288000  | -0.887541000 | 2.226475000  |
| 1  | 4.125461000  | -1.774247000 | 0.710220000  |
| 1  | 4.932718000  | -0.189735000 | 0.672495000  |
| 6  | 1.516576000  | 2.501719000  | -0.341240000 |
| 1  | 1.684368000  | 3.484211000  | -0.806511000 |
| 1  | 0.492940000  | 2.170408000  | -0.560839000 |
| 1  | 1.599976000  | 2.629890000  | 0.748403000  |
| 6  | 1.673506000  | -2.202549000 | -0.733854000 |
| 1  | 0.851836000  | -2.719028000 | -1.244821000 |
| 1  | 2.629850000  | -2.594284000 | -1.123401000 |
| 1  | 1.609300000  | -2.448737000 | 0.334957000  |
| 6  | -2.527893000 | 0.129154000  | 0.460135000  |
| 17 | -0.572748000 | -0.353460000 | -0.300347000 |
| 17 | -3.823648000 | -0.402717000 | -0.620406000 |
| 9  | -2.556590000 | 1.442370000  | 0.612013000  |
| 9  | -2.647264000 | -0.438930000 | 1.646658000  |

## In MeCN

|                                             |              |
|---------------------------------------------|--------------|
| SCF Done: E(UwB97XD)                        | -1449.103853 |
| Zero-point correction                       | 0.208191     |
| Thermal correction to Energy                | 0.223713     |
| Thermal correction to Enthalpy              | 0.224657     |
| Thermal correction to Gibbs Free Energy     | 0.161802     |
| Sum of electronic and zero-point Energies   | -1448.895662 |
| Sum of electronic and thermal Energies      | -1448.880141 |
| Sum of electronic and thermal Enthalpies    | -1448.879197 |
| Sum of electronic and thermal Free Energies | -1448.942052 |

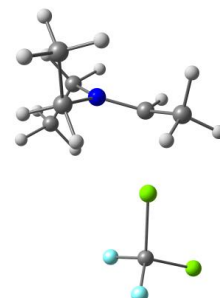

|   |             |              |              |
|---|-------------|--------------|--------------|
| 7 | 2.408323000 | 0.136472000  | -0.323098000 |
| 6 | 2.964057000 | -0.092687000 | 1.005402000  |
| 1 | 3.013470000 | 0.877989000  | 1.519963000  |
| 1 | 2.263621000 | -0.707773000 | 1.589163000  |
| 6 | 2.554677000 | 1.476637000  | -0.878978000 |
| 1 | 3.592147000 | 1.802016000  | -0.701542000 |

|    |              |              |              |
|----|--------------|--------------|--------------|
| 1  | 2.430738000  | 1.403230000  | -1.969116000 |
| 6  | 1.607079000  | -0.760536000 | -0.931268000 |
| 1  | 1.353735000  | -0.496100000 | -1.961589000 |
| 6  | 4.348405000  | -0.728934000 | 0.970046000  |
| 1  | 4.744296000  | -0.834469000 | 1.990498000  |
| 1  | 4.317799000  | -1.726648000 | 0.509827000  |
| 1  | 5.048948000  | -0.106343000 | 0.393852000  |
| 6  | 1.575911000  | 2.497426000  | -0.306406000 |
| 1  | 1.740688000  | 3.475599000  | -0.781036000 |
| 1  | 0.537438000  | 2.186607000  | -0.484162000 |
| 1  | 1.714262000  | 2.624063000  | 0.777951000  |
| 6  | 1.670923000  | -2.221554000 | -0.615135000 |
| 1  | 0.841572000  | -2.741361000 | -1.110552000 |
| 1  | 2.616006000  | -2.654737000 | -0.988488000 |
| 1  | 1.606638000  | -2.428169000 | 0.462186000  |
| 6  | -2.571275000 | 0.129226000  | 0.445085000  |
| 17 | -0.678818000 | -0.332197000 | -0.226689000 |
| 17 | -3.858800000 | -0.404169000 | -0.668728000 |
| 9  | -2.634287000 | 1.445367000  | 0.601642000  |
| 9  | -2.747799000 | -0.435195000 | 1.632176000  |

### Me<sub>2</sub>NCHNMe<sub>2</sub> radical (T3)

#### Gas phase

|                                             |              |
|---------------------------------------------|--------------|
| SCF Done: E(UwB97XD)                        | -307.4706471 |
| Zero-point correction                       | 0.181301     |
| Thermal correction to Energy                | 0.190764     |
| Thermal correction to Enthalpy              | 0.191708     |
| Thermal correction to Gibbs Free Energy     | 0.147151     |
| Sum of electronic and zero-point Energies   | -307.289346  |
| Sum of electronic and thermal Energies      | -307.279883  |
| Sum of electronic and thermal Enthalpies    | -307.278939  |
| Sum of electronic and thermal Free Energies | -307.323496  |

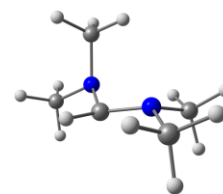

|   |              |              |              |
|---|--------------|--------------|--------------|
| 6 | 0.001472000  | -0.694317000 | -0.026445000 |
| 1 | -0.026070000 | -1.642101000 | 0.541099000  |
| 6 | -2.293355000 | -0.661829000 | -0.674812000 |
| 1 | -2.680711000 | -1.440923000 | 0.019803000  |
| 1 | -3.124170000 | 0.026629000  | -0.896623000 |
| 1 | -1.996950000 | -1.157536000 | -1.609713000 |
| 6 | -1.518384000 | 0.855197000  | 1.042810000  |
| 1 | -0.627644000 | 1.392800000  | 1.395844000  |
| 1 | -2.295536000 | 1.595376000  | 0.793852000  |
| 1 | -1.895053000 | 0.227915000  | 1.880010000  |
| 6 | 2.368274000  | -0.737271000 | 0.457984000  |
| 1 | 2.126125000  | -1.453212000 | 1.256419000  |
| 1 | 2.797179000  | -1.302524000 | -0.395209000 |
| 1 | 3.146406000  | -0.056510000 | 0.836675000  |
| 6 | 1.434774000  | 1.088717000  | -0.845185000 |
| 1 | 0.483509000  | 1.584997000  | -1.072411000 |
| 1 | 2.131810000  | 1.823771000  | -0.412927000 |
| 1 | 1.868380000  | 0.717706000  | -1.796546000 |
| 7 | -1.175068000 | 0.069274000  | -0.130888000 |
| 7 | 1.194503000  | 0.013674000  | 0.092833000  |

#### In MeCN

|                                |              |
|--------------------------------|--------------|
| SCF Done: E(UwB97XD)           | -307.4728318 |
| Zero-point correction          | 0.180798     |
| Thermal correction to Energy   | 0.190325     |
| Thermal correction to Enthalpy | 0.19127      |

|                                             |             |
|---------------------------------------------|-------------|
| Thermal correction to Gibbs Free Energy     | 0.146546    |
| Sum of electronic and zero-point Energies   | -307.292034 |
| Sum of electronic and thermal Energies      | -307.282506 |
| Sum of electronic and thermal Enthalpies    | -307.281562 |
| Sum of electronic and thermal Free Energies | -307.326285 |

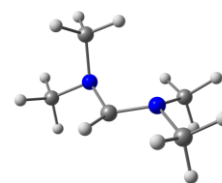

|   |              |              |              |
|---|--------------|--------------|--------------|
| 6 | -0.003016000 | -0.690772000 | -0.035434000 |
| 1 | -0.043823000 | -1.629477000 | 0.547110000  |
| 6 | -2.307588000 | -0.686575000 | -0.635679000 |
| 1 | -2.659794000 | -1.446833000 | 0.096599000  |
| 1 | -3.154515000 | -0.016244000 | -0.849962000 |
| 1 | -2.039169000 | -1.210439000 | -1.564137000 |
| 6 | -1.506862000 | 0.893921000  | 1.006768000  |
| 1 | -0.620703000 | 1.463595000  | 1.318443000  |
| 1 | -2.307263000 | 1.607575000  | 0.755996000  |
| 1 | -1.846193000 | 0.284882000  | 1.872349000  |
| 6 | 2.360816000  | -0.755921000 | 0.460762000  |
| 1 | 2.108579000  | -1.477378000 | 1.250707000  |
| 1 | 2.788902000  | -1.315320000 | -0.395911000 |
| 1 | 3.141835000  | -0.084220000 | 0.848011000  |
| 6 | 1.452685000  | 1.088777000  | -0.834566000 |
| 1 | 0.515693000  | 1.614618000  | -1.053510000 |
| 1 | 2.169527000  | 1.801245000  | -0.398528000 |
| 1 | 1.874627000  | 0.717695000  | -1.791016000 |
| 7 | -1.179460000 | 0.075907000  | -0.152416000 |
| 7 | 1.193187000  | 0.008910000  | 0.094236000  |

### Me<sub>2</sub>NCHNMe<sub>2</sub> radical (T3) + CF<sub>2</sub>Cl<sub>2</sub>, transition state

#### Gas phase

|                                             |              |
|---------------------------------------------|--------------|
| SCF Done: E(UwB97XD)                        | -1465.098621 |
| Zero-point correction                       | 0.196631     |
| Thermal correction to Energy                | 0.212369     |
| Thermal correction to Enthalpy              | 0.213313     |
| Thermal correction to Gibbs Free Energy     | 0.150027     |
| Sum of electronic and zero-point Energies   | -1464.90199  |
| Sum of electronic and thermal Energies      | -1464.886252 |
| Sum of electronic and thermal Enthalpies    | -1464.885308 |
| Sum of electronic and thermal Free Energies | -1464.948594 |

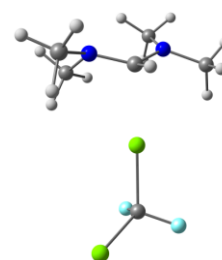

|    |              |              |              |
|----|--------------|--------------|--------------|
| 6  | 2.465013000  | -0.419352000 | 0.179719000  |
| 9  | 2.587028000  | -0.630408000 | 1.480695000  |
| 9  | 2.884668000  | -1.498548000 | -0.460118000 |
| 17 | 3.431080000  | 0.993613000  | -0.300700000 |
| 17 | 0.427067000  | -0.167807000 | -0.235405000 |
| 6  | -1.954960000 | 0.109638000  | -0.631121000 |
| 1  | -1.756514000 | 0.167149000  | -1.705423000 |
| 6  | -1.812842000 | 1.565718000  | 1.337350000  |
| 1  | -0.796354000 | 1.997557000  | 1.343951000  |
| 1  | -2.506074000 | 2.263802000  | 1.831185000  |
| 1  | -1.769913000 | 0.640974000  | 1.919917000  |
| 6  | -2.087303000 | 2.474380000  | -0.881263000 |
| 1  | -2.604526000 | 2.327560000  | -1.839029000 |
| 1  | -2.529691000 | 3.353356000  | -0.391042000 |
| 1  | -1.018247000 | 2.685850000  | -1.077822000 |
| 6  | -2.073606000 | -2.270672000 | -0.875810000 |
| 1  | -1.811750000 | -2.072086000 | -1.924721000 |
| 1  | -1.169048000 | -2.657211000 | -0.373391000 |
| 1  | -2.859450000 | -3.039460000 | -0.852550000 |
| 6  | -3.218025000 | -1.214187000 | 1.020211000  |



|   |              |              |              |
|---|--------------|--------------|--------------|
| 1 | -3.771867000 | -0.298203000 | 1.264287000  |
| 1 | -3.938948000 | -2.041775000 | 0.949161000  |
| 1 | -2.516950000 | -1.445391000 | 1.845431000  |
| 7 | -2.254729000 | 1.313084000  | -0.027814000 |
| 7 | -2.558710000 | -1.060706000 | -0.251598000 |

**In MeCN**

|                                             |              |
|---------------------------------------------|--------------|
| SCF Done: E(UwB97XD)                        | -1465.106057 |
| Zero-point correction                       | 0.195903     |
| Thermal correction to Energy                | 0.211571     |
| Thermal correction to Enthalpy              | 0.212516     |
| Thermal correction to Gibbs Free Energy     | 0.149448     |
| Sum of electronic and zero-point Energies   | -1464.910154 |
| Sum of electronic and thermal Energies      | -1464.894486 |
| Sum of electronic and thermal Enthalpies    | -1464.893542 |
| Sum of electronic and thermal Free Energies | -1464.956609 |

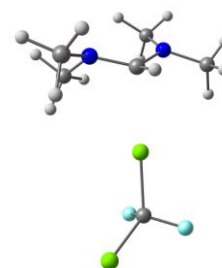

|    |              |              |              |
|----|--------------|--------------|--------------|
| 6  | 2.456129000  | -0.407527000 | 0.177604000  |
| 9  | 2.612540000  | -0.619748000 | 1.477790000  |
| 9  | 2.885377000  | -1.484826000 | -0.466489000 |
| 17 | 3.433179000  | 1.005472000  | -0.311486000 |
| 17 | 0.524457000  | -0.165885000 | -0.195664000 |
| 6  | -1.959888000 | 0.099833000  | -0.630367000 |
| 1  | -1.738039000 | 0.155252000  | -1.701105000 |
| 6  | -1.866495000 | 1.572325000  | 1.333074000  |
| 1  | -0.851729000 | 2.011163000  | 1.353993000  |
| 1  | -2.564404000 | 2.277152000  | 1.809401000  |
| 1  | -1.840002000 | 0.655134000  | 1.929683000  |
| 6  | -2.162494000 | 2.466264000  | -0.891697000 |
| 1  | -2.666994000 | 2.295578000  | -1.852009000 |
| 1  | -2.637042000 | 3.331652000  | -0.407465000 |
| 1  | -1.102097000 | 2.722024000  | -1.086847000 |
| 6  | -2.071227000 | -2.287376000 | -0.873555000 |
| 1  | -1.781198000 | -2.086761000 | -1.914759000 |
| 1  | -1.187720000 | -2.692423000 | -0.346806000 |
| 1  | -2.861826000 | -3.051116000 | -0.874233000 |
| 6  | -3.259327000 | -1.228384000 | 0.996396000  |
| 1  | -3.824075000 | -0.314300000 | 1.221607000  |
| 1  | -3.972012000 | -2.060985000 | 0.909484000  |
| 1  | -2.582643000 | -1.450644000 | 1.844088000  |
| 7  | -2.290444000 | 1.303506000  | -0.033790000 |
| 7  | -2.562623000 | -1.076985000 | -0.256768000 |

**Triazinane radical (T1), structure C1****Gas phase**

|                                             |              |
|---------------------------------------------|--------------|
| SCF Done: E(UwB97XD)                        | -400.8345676 |
| Zero-point correction                       | 0.208238     |
| Thermal correction to Energy                | 0.217813     |
| Thermal correction to Enthalpy              | 0.218757     |
| Thermal correction to Gibbs Free Energy     | 0.173829     |
| Sum of electronic and zero-point Energies   | -400.626329  |
| Sum of electronic and thermal Energies      | -400.616755  |
| Sum of electronic and thermal Enthalpies    | -400.61581   |
| Sum of electronic and thermal Free Energies | -400.660739  |

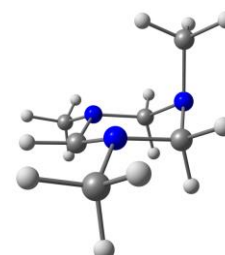

|   |              |              |              |
|---|--------------|--------------|--------------|
| 6 | -0.145415000 | 0.927929000  | 1.174509000  |
| 6 | -0.605226000 | -1.112644000 | 0.000000000  |
| 6 | -0.145415000 | 0.927929000  | -1.174509000 |
| 1 | -0.618700000 | -2.209676000 | 0.000000000  |
| 1 | -1.185253000 | 1.322749000  | 1.192452000  |
| 1 | 0.367890000  | 1.290082000  | 2.079121000  |
| 1 | 0.367890000  | 1.290082000  | -2.079121000 |
| 1 | -1.185253000 | 1.322749000  | -1.192452000 |
| 6 | -0.657461000 | -1.115080000 | 2.404467000  |
| 1 | -0.513087000 | -2.205793000 | 2.383490000  |
| 1 | -0.105547000 | -0.719670000 | 3.270911000  |
| 1 | -1.738481000 | -0.918066000 | 2.562527000  |
| 6 | -0.657461000 | -1.115080000 | -2.404467000 |
| 1 | -0.105547000 | -0.719670000 | -3.270911000 |
| 1 | -0.513087000 | -2.205793000 | -2.383490000 |
| 1 | -1.738481000 | -0.918066000 | -2.562527000 |
| 7 | 0.510626000  | 1.439402000  | 0.000000000  |
| 7 | -0.145415000 | -0.529012000 | 1.193009000  |
| 7 | -0.145415000 | -0.529012000 | -1.193009000 |
| 6 | 1.947919000  | 1.226355000  | 0.000000000  |
| 1 | 2.387624000  | 1.703603000  | -0.888413000 |
| 1 | 2.387624000  | 1.703603000  | 0.888413000  |
| 1 | 2.232183000  | 0.157768000  | 0.000000000  |

**In MeCN**

|                                             |              |
|---------------------------------------------|--------------|
| SCF Done: E(UwB97XD)                        | -400.8389468 |
| Zero-point correction                       | 0.207911     |
| Thermal correction to Energy                | 0.217506     |
| Thermal correction to Enthalpy              | 0.21845      |
| Thermal correction to Gibbs Free Energy     | 0.17348      |
| Sum of electronic and zero-point Energies   | -400.631036  |
| Sum of electronic and thermal Energies      | -400.621441  |
| Sum of electronic and thermal Enthalpies    | -400.620496  |
| Sum of electronic and thermal Free Energies | -400.665467  |

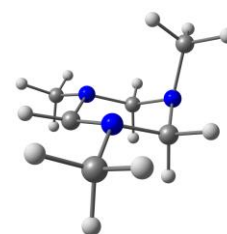

|   |              |              |              |
|---|--------------|--------------|--------------|
| 6 | -0.142747000 | 0.924939000  | 1.176993000  |
| 6 | -0.610409000 | -1.112219000 | 0.000000000  |
| 6 | -0.142747000 | 0.924939000  | -1.176993000 |
| 1 | -0.639394000 | -2.209288000 | 0.000000000  |
| 1 | -1.183513000 | 1.316333000  | 1.198543000  |
| 1 | 0.371161000  | 1.285614000  | 2.081119000  |
| 1 | 0.371161000  | 1.285614000  | -2.081119000 |
| 1 | -1.183513000 | 1.316333000  | -1.198543000 |
| 6 | -0.659213000 | -1.117095000 | 2.406841000  |
| 1 | -0.523858000 | -2.208699000 | 2.385267000  |
| 1 | -0.106461000 | -0.723440000 | 3.272854000  |
| 1 | -1.738027000 | -0.910194000 | 2.563616000  |
| 6 | -0.659213000 | -1.117095000 | -2.406841000 |
| 1 | -0.106461000 | -0.723440000 | -3.272854000 |
| 1 | -0.523858000 | -2.208699000 | -2.385267000 |
| 1 | -1.738027000 | -0.910194000 | -2.563616000 |
| 7 | 0.509851000  | 1.441247000  | 0.000000000  |
| 7 | -0.142747000 | -0.533239000 | 1.192780000  |
| 7 | -0.142747000 | -0.533239000 | -1.192780000 |
| 6 | 1.949811000  | 1.239744000  | 0.000000000  |
| 1 | 2.386883000  | 1.716967000  | -0.889497000 |
| 1 | 2.386883000  | 1.716967000  | 0.889497000  |
| 1 | 2.243634000  | 0.173465000  | 0.000000000  |

Triazinane radical (T1) [structure C1] + CF<sub>2</sub>Cl<sub>2</sub>, transition state

## Gas phase

|                                             |              |
|---------------------------------------------|--------------|
| SCF Done: E(Uwb97XD)                        | -1558.470883 |
| Zero-point correction                       | 0.222566     |
| Thermal correction to Energy                | 0.238556     |
| Thermal correction to Enthalpy              | 0.2395       |
| Thermal correction to Gibbs Free Energy     | 0.176256     |
| Sum of electronic and zero-point Energies   | -1558.248318 |
| Sum of electronic and thermal Energies      | -1558.232327 |
| Sum of electronic and thermal Enthalpies    | -1558.231383 |
| Sum of electronic and thermal Free Energies | -1558.294628 |

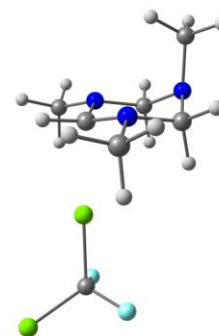

|    |              |              |              |
|----|--------------|--------------|--------------|
| 6  | 2.241759000  | -1.191710000 | 0.767532000  |
| 6  | 1.393942000  | 0.040608000  | -1.102167000 |
| 6  | 2.233521000  | 1.155184000  | 0.844440000  |
| 1  | 1.091707000  | 0.074392000  | -2.152770000 |
| 1  | 1.308579000  | -1.246142000 | 1.361574000  |
| 1  | 2.829765000  | -2.101200000 | 0.959996000  |
| 1  | 2.816704000  | 2.053815000  | 1.094531000  |
| 1  | 1.301353000  | 1.165445000  | 1.442590000  |
| 6  | 1.334298000  | -2.361989000 | -1.201724000 |
| 1  | 1.216494000  | -2.262045000 | -2.289920000 |
| 1  | 2.009089000  | -3.208117000 | -1.006510000 |
| 1  | 0.342083000  | -2.579765000 | -0.765866000 |
| 6  | 1.313538000  | 2.443591000  | -1.043965000 |
| 1  | 1.978123000  | 3.281594000  | -0.788167000 |
| 1  | 1.201601000  | 2.417026000  | -2.137109000 |
| 1  | 0.317151000  | 2.621108000  | -0.599181000 |
| 7  | 2.985142000  | -0.027237000 | 1.159246000  |
| 7  | 1.909009000  | -1.153641000 | -0.657929000 |
| 7  | 1.898911000  | 1.207434000  | -0.580300000 |
| 17 | -0.934569000 | -0.000974000 | -0.274626000 |
| 6  | -2.825150000 | -0.065253000 | 0.537451000  |
| 9  | -2.905240000 | 0.883313000  | 1.456701000  |
| 9  | -2.970104000 | -1.237970000 | 1.133335000  |
| 17 | -4.095359000 | 0.159709000  | -0.684161000 |
| 6  | 4.350149000  | -0.005265000 | 0.662107000  |
| 1  | 4.874605000  | 0.868338000  | 1.075661000  |
| 1  | 4.878745000  | -0.905829000 | 1.006725000  |
| 1  | 4.417106000  | 0.037896000  | -0.441662000 |

## In MeCN

|                                             |              |
|---------------------------------------------|--------------|
| SCF Done: E(Uwb97XD)                        | -1558.478337 |
| Zero-point correction                       | 0.221739     |
| Thermal correction to Energy                | 0.237786     |
| Thermal correction to Enthalpy              | 0.238731     |
| Thermal correction to Gibbs Free Energy     | 0.175316     |
| Sum of electronic and zero-point Energies   | -1558.256599 |
| Sum of electronic and thermal Energies      | -1558.240551 |
| Sum of electronic and thermal Enthalpies    | -1558.239607 |
| Sum of electronic and thermal Free Energies | -1558.303021 |

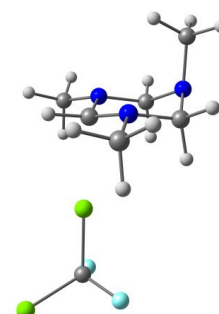

|   |             |              |              |
|---|-------------|--------------|--------------|
| 6 | 2.275157000 | -1.193733000 | 0.763624000  |
| 6 | 1.390264000 | 0.040500000  | -1.093774000 |
| 6 | 2.267707000 | 1.157711000  | 0.840790000  |
| 1 | 1.087497000 | 0.074520000  | -2.145011000 |
| 1 | 1.354041000 | -1.250322000 | 1.377938000  |

|    |              |              |              |
|----|--------------|--------------|--------------|
| 1  | 2.865748000  | -2.102877000 | 0.947023000  |
| 1  | 2.854285000  | 2.056102000  | 1.081712000  |
| 1  | 1.347906000  | 1.169831000  | 1.459671000  |
| 6  | 1.356086000  | -2.369249000 | -1.195819000 |
| 1  | 1.215566000  | -2.263520000 | -2.280600000 |
| 1  | 2.047274000  | -3.205551000 | -1.018299000 |
| 1  | 0.377815000  | -2.615568000 | -0.741964000 |
| 6  | 1.335194000  | 2.450591000  | -1.037294000 |
| 1  | 2.013532000  | 3.281093000  | -0.795115000 |
| 1  | 1.205303000  | 2.419563000  | -2.128189000 |
| 1  | 0.349845000  | 2.652217000  | -0.576418000 |
| 7  | 3.023679000  | -0.027021000 | 1.148481000  |
| 7  | 1.919531000  | -1.154813000 | -0.654034000 |
| 7  | 1.909977000  | 1.208571000  | -0.576139000 |
| 17 | -1.014159000 | -0.003584000 | -0.224454000 |
| 6  | -2.822359000 | -0.065531000 | 0.528871000  |
| 9  | -2.931877000 | 0.880884000  | 1.451103000  |
| 9  | -2.994489000 | -1.238389000 | 1.122996000  |
| 17 | -4.086163000 | 0.163417000  | -0.709143000 |
| 6  | 4.381011000  | -0.004544000 | 0.625496000  |
| 1  | 4.912235000  | 0.870594000  | 1.026556000  |
| 1  | 4.915461000  | -0.906584000 | 0.956510000  |
| 1  | 4.425602000  | 0.039269000  | -0.479086000 |

### Triazinane radical (T1), structure C2

#### Gas phase

|                                             |              |
|---------------------------------------------|--------------|
| SCF Done: E(UwB97XD)                        | -400.8287094 |
| Zero-point correction                       | 0.208021     |
| Thermal correction to Energy                | 0.217499     |
| Thermal correction to Enthalpy              | 0.218444     |
| Thermal correction to Gibbs Free Energy     | 0.173688     |
| Sum of electronic and zero-point Energies   | -400.620689  |
| Sum of electronic and thermal Energies      | -400.61121   |
| Sum of electronic and thermal Enthalpies    | -400.610266  |
| Sum of electronic and thermal Free Energies | -400.655022  |

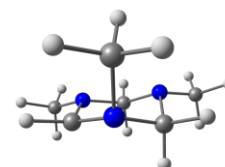

|   |              |              |              |
|---|--------------|--------------|--------------|
| 6 | 1.185706000  | 0.477854000  | 0.688181000  |
| 6 | -0.184091000 | -1.295409000 | -0.082277000 |
| 6 | -1.120142000 | 0.862931000  | 0.485462000  |
| 1 | -0.298531000 | -2.066257000 | -0.863115000 |
| 1 | 1.093265000  | 0.115556000  | 1.737507000  |
| 1 | 2.174861000  | 0.947776000  | 0.576210000  |
| 1 | -1.971208000 | 1.546529000  | 0.399136000  |
| 1 | -0.226275000 | -1.823819000 | 0.911460000  |
| 7 | 0.153833000  | 1.451564000  | 0.453390000  |
| 7 | 1.084203000  | -0.629135000 | -0.252858000 |
| 7 | -1.283428000 | -0.360703000 | -0.189204000 |
| 6 | 0.408995000  | 2.330491000  | -0.679759000 |
| 1 | 0.457804000  | 1.781325000  | -1.639121000 |
| 1 | -0.392324000 | 3.080612000  | -0.747072000 |
| 1 | 1.359503000  | 2.866427000  | -0.531768000 |
| 6 | 2.194504000  | -1.544268000 | -0.181935000 |
| 1 | 2.091930000  | -2.326275000 | -0.949920000 |
| 1 | 3.135589000  | -1.007417000 | -0.374376000 |
| 1 | 2.287979000  | -2.049520000 | 0.806185000  |
| 6 | -2.581668000 | -0.977327000 | -0.092133000 |
| 1 | -3.363457000 | -0.226846000 | -0.278336000 |
| 1 | -2.679715000 | -1.765823000 | -0.854104000 |
| 1 | -2.771506000 | -1.429980000 | 0.902779000  |

## In MeCN

|                                             |              |
|---------------------------------------------|--------------|
| SCF Done: E(UwB97XD)                        | -400.8339684 |
| Zero-point correction                       | 0.207824     |
| Thermal correction to Energy                | 0.217305     |
| Thermal correction to Enthalpy              | 0.21825      |
| Thermal correction to Gibbs Free Energy     | 0.173485     |
| Sum of electronic and zero-point Energies   | -400.626145  |
| Sum of electronic and thermal Energies      | -400.616663  |
| Sum of electronic and thermal Enthalpies    | -400.615719  |
| Sum of electronic and thermal Free Energies | -400.660484  |

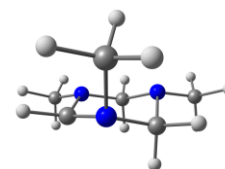

|   |              |              |              |
|---|--------------|--------------|--------------|
| 6 | 1.191168000  | 0.472023000  | 0.681029000  |
| 6 | -0.187098000 | -1.298517000 | -0.073149000 |
| 6 | -1.120489000 | 0.865573000  | 0.479875000  |
| 1 | -0.308503000 | -2.081562000 | -0.839417000 |
| 1 | 1.104279000  | 0.103644000  | 1.728755000  |
| 1 | 2.180076000  | 0.940739000  | 0.567612000  |
| 1 | -1.965553000 | 1.554839000  | 0.374074000  |
| 1 | -0.224192000 | -1.809429000 | 0.927925000  |
| 7 | 0.158032000  | 1.451737000  | 0.456243000  |
| 7 | 1.081104000  | -0.632817000 | -0.261577000 |
| 7 | -1.284640000 | -0.359905000 | -0.188996000 |
| 6 | 0.415618000  | 2.341556000  | -0.669837000 |
| 1 | 0.464151000  | 1.801432000  | -1.634550000 |
| 1 | -0.384774000 | 3.092827000  | -0.734211000 |
| 1 | 1.368225000  | 2.872253000  | -0.519375000 |
| 6 | 2.191904000  | -1.553183000 | -0.184453000 |
| 1 | 2.083608000  | -2.342201000 | -0.943782000 |
| 1 | 3.133955000  | -1.020132000 | -0.380765000 |
| 1 | 2.281623000  | -2.047197000 | 0.808113000  |
| 6 | -2.588351000 | -0.972753000 | -0.093663000 |
| 1 | -3.367067000 | -0.220044000 | -0.282373000 |
| 1 | -2.685539000 | -1.763834000 | -0.852039000 |
| 1 | -2.778270000 | -1.422624000 | 0.901532000  |

## Triazinane radical (T1), structure C3

## Gas phase

|                                             |              |
|---------------------------------------------|--------------|
| SCF Done: E(UwB97XD)                        | -400.8276441 |
| Zero-point correction                       | 0.207322     |
| Thermal correction to Energy                | 0.217054     |
| Thermal correction to Enthalpy              | 0.217998     |
| Thermal correction to Gibbs Free Energy     | 0.172714     |
| Sum of electronic and zero-point Energies   | -400.620322  |
| Sum of electronic and thermal Energies      | -400.61059   |
| Sum of electronic and thermal Enthalpies    | -400.609646  |
| Sum of electronic and thermal Free Energies | -400.654931  |

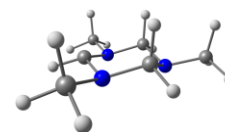

|   |              |              |              |
|---|--------------|--------------|--------------|
| 6 | 0.432594000  | 0.543622000  | 1.188199000  |
| 6 | 0.432594000  | 0.543622000  | -1.188199000 |
| 6 | -0.579510000 | -1.273005000 | 0.000000000  |
| 1 | 0.257301000  | 1.176858000  | -2.073096000 |
| 1 | 1.479265000  | 0.133795000  | 1.271389000  |
| 1 | 0.257301000  | 1.176858000  | 2.073096000  |
| 1 | -1.312591000 | -2.088482000 | 0.000000000  |
| 1 | 1.479265000  | 0.133795000  | -1.271389000 |

|   |              |              |              |
|---|--------------|--------------|--------------|
| 7 | -0.530012000 | -0.531125000 | 1.189484000  |
| 7 | 0.288917000  | 1.348097000  | 0.000000000  |
| 7 | -0.530012000 | -0.531125000 | -1.189484000 |
| 6 | -0.530012000 | -1.310324000 | 2.401079000  |
| 1 | -0.708697000 | -0.653565000 | 3.266147000  |
| 1 | -1.342753000 | -2.050422000 | 2.367357000  |
| 1 | 0.422278000  | -1.856181000 | 2.568099000  |
| 6 | 1.161026000  | 2.494844000  | 0.000000000  |
| 1 | 0.966411000  | 3.113586000  | -0.888827000 |
| 1 | 0.966411000  | 3.113586000  | 0.888827000  |
| 1 | 2.242664000  | 2.228788000  | 0.000000000  |
| 6 | -0.530012000 | -1.310324000 | -2.401079000 |
| 1 | -1.342753000 | -2.050422000 | -2.367357000 |
| 1 | -0.708697000 | -0.653565000 | -3.266147000 |
| 1 | 0.422278000  | -1.856181000 | -2.568099000 |

### In MeCN

|                                             |              |
|---------------------------------------------|--------------|
| SCF Done: E(UwB97XD)                        | -400.8340324 |
| Zero-point correction                       | 0.207155     |
| Thermal correction to Energy                | 0.216871     |
| Thermal correction to Enthalpy              | 0.217815     |
| Thermal correction to Gibbs Free Energy     | 0.172595     |
| Sum of electronic and zero-point Energies   | -400.626878  |
| Sum of electronic and thermal Energies      | -400.617162  |
| Sum of electronic and thermal Enthalpies    | -400.616217  |
| Sum of electronic and thermal Free Energies | -400.661437  |

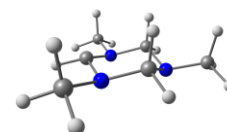

|   |              |              |              |
|---|--------------|--------------|--------------|
| 6 | 0.440027000  | 0.538474000  | 1.186782000  |
| 6 | 0.440027000  | 0.538474000  | -1.186782000 |
| 6 | -0.594469000 | -1.265311000 | 0.000000000  |
| 1 | 0.288060000  | 1.168377000  | -2.077404000 |
| 1 | 1.477952000  | 0.109407000  | 1.254609000  |
| 1 | 0.288060000  | 1.168377000  | 2.077404000  |
| 1 | -1.323979000 | -2.084292000 | 0.000000000  |
| 1 | 1.477952000  | 0.109407000  | -1.254609000 |
| 7 | -0.543789000 | -0.521627000 | 1.190336000  |
| 7 | 0.296095000  | 1.349998000  | 0.000000000  |
| 7 | -0.543789000 | -0.521627000 | -1.190336000 |
| 6 | -0.543789000 | -1.306172000 | 2.403070000  |
| 1 | -0.711007000 | -0.650465000 | 3.270409000  |
| 1 | -1.359843000 | -2.042302000 | 2.370650000  |
| 1 | 0.406997000  | -1.855279000 | 2.561737000  |
| 6 | 1.195387000  | 2.481645000  | 0.000000000  |
| 1 | 1.015844000  | 3.102280000  | -0.890133000 |
| 1 | 1.015844000  | 3.102280000  | 0.890133000  |
| 1 | 2.267987000  | 2.187417000  | 0.000000000  |
| 6 | -0.543789000 | -1.306172000 | -2.403070000 |
| 1 | -1.359843000 | -2.042302000 | -2.370650000 |
| 1 | -0.711007000 | -0.650465000 | -3.270409000 |
| 1 | 0.406997000  | -1.855279000 | -2.561737000 |

Et<sub>2</sub>NCHMe radical (T5) + CF<sub>2</sub>Cl<sub>2</sub>, complex

## In MeCN

|                                             |              |
|---------------------------------------------|--------------|
| SCF Done: E(UwB97XD)                        | -1449.112516 |
| Zero-point correction                       | 0.207129     |
| Thermal correction to Energy                | 0.22351      |
| Thermal correction to Enthalpy              | 0.224454     |
| Thermal correction to Gibbs Free Energy     | 0.158447     |
| Sum of electronic and zero-point Energies   | -1448.905386 |
| Sum of electronic and thermal Energies      | -1448.889005 |
| Sum of electronic and thermal Enthalpies    | -1448.888061 |
| Sum of electronic and thermal Free Energies | -1448.954068 |

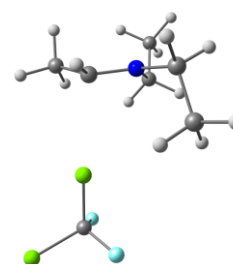

|    |              |              |              |
|----|--------------|--------------|--------------|
| 7  | 2.576591000  | 0.136377000  | -0.294191000 |
| 6  | 2.593925000  | -0.263160000 | 1.103608000  |
| 1  | 2.553742000  | 0.645956000  | 1.725157000  |
| 1  | 1.674810000  | -0.823172000 | 1.340392000  |
| 6  | 2.904458000  | 1.517792000  | -0.590176000 |
| 1  | 3.749243000  | 1.813772000  | 0.052976000  |
| 1  | 3.275838000  | 1.570976000  | -1.626524000 |
| 6  | 1.869887000  | -0.594181000 | -1.235800000 |
| 1  | 1.903323000  | -0.154588000 | -2.238699000 |
| 6  | 3.824194000  | -1.081774000 | 1.482093000  |
| 1  | 3.813573000  | -1.324589000 | 2.555654000  |
| 1  | 3.859775000  | -2.024891000 | 0.917137000  |
| 1  | 4.746453000  | -0.520730000 | 1.266825000  |
| 6  | 1.746097000  | 2.497199000  | -0.408741000 |
| 1  | 2.072798000  | 3.526422000  | -0.620157000 |
| 1  | 0.917346000  | 2.248662000  | -1.087940000 |
| 1  | 1.357972000  | 2.467534000  | 0.621249000  |
| 6  | 1.781193000  | -2.084353000 | -1.142552000 |
| 1  | 1.093375000  | -2.465463000 | -1.911356000 |
| 1  | 2.759511000  | -2.584590000 | -1.299057000 |
| 1  | 1.400794000  | -2.431474000 | -0.167702000 |
| 6  | -2.490875000 | 0.131094000  | 0.432862000  |
| 17 | -0.889480000 | -0.129429000 | -0.296531000 |
| 17 | -3.791952000 | -0.455895000 | -0.621320000 |
| 9  | -2.666519000 | 1.424396000  | 0.659053000  |
| 9  | -2.556107000 | -0.500358000 | 1.595068000  |

Me<sub>2</sub>NCHNMe<sub>2</sub> radical (T3) + CF<sub>2</sub>Cl<sub>2</sub>, complex

## In MeCN

|                                             |              |
|---------------------------------------------|--------------|
| SCF Done: E(UwB97XD)                        | -1465.114267 |
| Zero-point correction                       | 0.195141     |
| Thermal correction to Energy                | 0.211517     |
| Thermal correction to Enthalpy              | 0.212462     |
| Thermal correction to Gibbs Free Energy     | 0.146897     |
| Sum of electronic and zero-point Energies   | -1464.919126 |
| Sum of electronic and thermal Energies      | -1464.90275  |
| Sum of electronic and thermal Enthalpies    | -1464.901805 |
| Sum of electronic and thermal Free Energies | -1464.96737  |

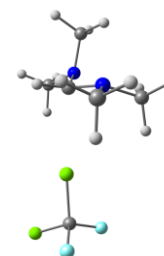

|    |              |              |              |
|----|--------------|--------------|--------------|
| 6  | -2.605271000 | 0.236400000  | 0.167307000  |
| 9  | -2.793886000 | 0.454978000  | 1.459231000  |
| 9  | -3.036533000 | 1.297537000  | -0.496023000 |
| 17 | -3.547638000 | -1.182708000 | -0.325519000 |

|    |              |              |              |
|----|--------------|--------------|--------------|
| 17 | -0.869371000 | 0.008918000  | -0.145474000 |
| 6  | 2.099007000  | -0.077251000 | -0.569200000 |
| 1  | 2.042822000  | -0.202942000 | -1.665734000 |
| 6  | 2.098646000  | -2.407924000 | -0.084515000 |
| 1  | 2.334838000  | -2.771930000 | -1.108901000 |
| 1  | 2.482625000  | -3.152946000 | 0.629259000  |
| 1  | 1.005120000  | -2.365704000 | 0.016464000  |
| 6  | 4.128648000  | -1.130501000 | 0.220987000  |
| 1  | 4.508999000  | -0.128362000 | 0.461260000  |
| 1  | 4.485269000  | -1.831026000 | 0.992098000  |
| 1  | 4.564978000  | -1.439013000 | -0.753154000 |
| 6  | 1.947696000  | 2.281842000  | -1.057787000 |
| 1  | 2.218242000  | 2.020966000  | -2.090774000 |
| 1  | 0.856769000  | 2.475371000  | -1.023416000 |
| 1  | 2.466691000  | 3.215525000  | -0.794091000 |
| 6  | 2.176667000  | 1.543345000  | 1.247171000  |
| 1  | 2.501343000  | 0.691538000  | 1.856489000  |
| 1  | 2.780522000  | 2.424590000  | 1.511586000  |
| 1  | 1.117816000  | 1.761085000  | 1.492101000  |
| 7  | 2.672578000  | -1.111120000 | 0.194887000  |
| 7  | 2.345209000  | 1.226715000  | -0.156168000 |

### Triazinane radical (**T1**) [structure **C1**] + CF<sub>2</sub>Cl<sub>2</sub>, complex

#### In MeCN

|                                             |              |
|---------------------------------------------|--------------|
| SCF Done: E(UwB97XD)                        | -1558.481808 |
| Zero-point correction                       | 0.222074     |
| Thermal correction to Energy                | 0.238599     |
| Thermal correction to Enthalpy              | 0.239544     |
| Thermal correction to Gibbs Free Energy     | 0.174195     |
| Sum of electronic and zero-point Energies   | -1558.259734 |
| Sum of electronic and thermal Energies      | -1558.243209 |
| Sum of electronic and thermal Enthalpies    | -1558.242265 |
| Sum of electronic and thermal Free Energies | -1558.307613 |

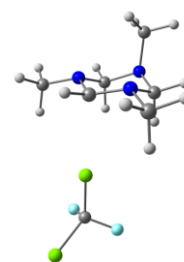

|    |              |              |              |
|----|--------------|--------------|--------------|
| 6  | -2.268996000 | -1.203017000 | -0.739538000 |
| 6  | -1.544851000 | 0.054286000  | 1.171650000  |
| 6  | -2.277328000 | 1.149622000  | -0.833732000 |
| 1  | -1.364449000 | 0.098672000  | 2.252760000  |
| 1  | -1.289640000 | -1.245418000 | -1.261937000 |
| 1  | -2.825313000 | -2.119530000 | -0.988303000 |
| 1  | -2.840221000 | 2.039284000  | -1.154763000 |
| 1  | -1.298261000 | 1.157195000  | -1.358557000 |
| 6  | -1.485301000 | -2.351241000 | 1.269159000  |
| 1  | -1.460376000 | -2.273584000 | 2.366134000  |
| 1  | -2.096338000 | -3.226693000 | 1.003191000  |
| 1  | -0.449876000 | -2.530244000 | 0.915671000  |
| 6  | -1.501130000 | 2.460191000  | 1.075903000  |
| 1  | -2.120684000 | 3.307053000  | 0.745108000  |
| 1  | -1.470887000 | 2.469977000  | 2.175420000  |
| 1  | -0.468815000 | 2.619202000  | 0.703984000  |
| 7  | -2.987696000 | -0.046148000 | -1.210003000 |
| 7  | -2.071921000 | -1.158839000 | 0.705730000  |
| 7  | -2.080150000 | 1.222735000  | 0.610586000  |
| 17 | 1.228842000  | 0.005283000  | 0.173881000  |
| 6  | 2.877256000  | -0.065194000 | -0.518118000 |
| 9  | 3.007262000  | 0.875292000  | -1.441067000 |
| 9  | 3.058982000  | -1.240123000 | -1.100919000 |
| 17 | 4.119068000  | 0.165749000  | 0.727963000  |
| 6  | -4.389209000 | -0.035472000 | -0.823248000 |
| 1  | -4.887585000 | 0.833597000  | -1.277390000 |



|   |              |              |              |
|---|--------------|--------------|--------------|
| 1 | -4.880522000 | -0.943533000 | -1.202448000 |
| 1 | -4.541992000 | 0.010664000  | 0.270990000  |

### Iminium ion from the reaction of Et<sub>2</sub>NCHMe radical T5

#### In MeCN

|                                             |              |
|---------------------------------------------|--------------|
| SCF Done: E(RwB97XD)                        | -291.3680069 |
| Zero-point correction                       | 0.196995     |
| Thermal correction to Energy                | 0.206222     |
| Thermal correction to Enthalpy              | 0.207167     |
| Thermal correction to Gibbs Free Energy     | 0.163011     |
| Sum of electronic and zero-point Energies   | -291.171012  |
| Sum of electronic and thermal Energies      | -291.161784  |
| Sum of electronic and thermal Enthalpies    | -291.16084   |
| Sum of electronic and thermal Free Energies | -291.204996  |

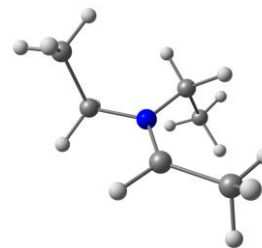

|   |              |              |              |
|---|--------------|--------------|--------------|
| 7 | 0.110875000  | -0.149646000 | 0.100318000  |
| 6 | -0.392107000 | 1.039317000  | -0.617954000 |
| 1 | 0.488323000  | 1.561688000  | -1.010655000 |
| 1 | -0.974548000 | 0.703194000  | -1.483859000 |
| 6 | 1.481033000  | -0.047534000 | 0.645299000  |
| 1 | 1.570085000  | 0.952255000  | 1.091913000  |
| 1 | 1.571384000  | -0.781305000 | 1.455538000  |
| 6 | -0.580368000 | -1.218881000 | 0.271683000  |
| 1 | -0.085695000 | -2.019458000 | 0.832461000  |
| 6 | -1.202455000 | 1.947201000  | 0.293279000  |
| 1 | -1.512804000 | 2.834927000  | -0.273585000 |
| 1 | -2.104883000 | 1.441903000  | 0.664717000  |
| 1 | -0.608296000 | 2.281964000  | 1.155110000  |
| 6 | 2.537667000  | -0.276678000 | -0.422168000 |
| 1 | 3.530023000  | -0.179231000 | 0.037801000  |
| 1 | 2.449369000  | -1.284997000 | -0.850114000 |
| 1 | 2.469272000  | 0.460106000  | -1.234638000 |
| 6 | -1.952683000 | -1.473009000 | -0.200608000 |
| 1 | -1.931548000 | -2.368470000 | -0.840965000 |
| 1 | -2.566352000 | -1.736408000 | 0.674736000  |
| 1 | -2.416980000 | -0.641139000 | -0.737876000 |

### Iminium ion from the reaction of Me<sub>2</sub>NCHNMe<sub>2</sub> radical T3

#### In MeCN

|                                             |              |
|---------------------------------------------|--------------|
| SCF Done: E(RwB97XD)                        | -307.3914322 |
| Zero-point correction                       | 0.186510     |
| Thermal correction to Energy                | 0.195694     |
| Thermal correction to Enthalpy              | 0.196638     |
| Thermal correction to Gibbs Free Energy     | 0.153229     |
| Sum of electronic and zero-point Energies   | -307.204922  |
| Sum of electronic and thermal Energies      | -307.195738  |
| Sum of electronic and thermal Enthalpies    | -307.194794  |
| Sum of electronic and thermal Free Energies | -307.238203  |

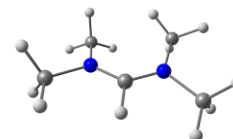

|   |             |              |              |
|---|-------------|--------------|--------------|
| 6 | 0.000065000 | -0.654819000 | -0.000095000 |
| 1 | 0.000085000 | -1.747822000 | -0.000190000 |
| 6 | 1.500514000 | 1.307198000  | 0.251508000  |
| 1 | 0.741826000 | 1.777510000  | 0.882773000  |
| 1 | 2.457931000 | 1.358200000  | 0.784115000  |
| 1 | 1.601970000 | 1.853356000  | -0.696905000 |

|   |              |              |              |
|---|--------------|--------------|--------------|
| 6 | 2.365694000  | -0.958788000 | -0.166394000 |
| 1 | 2.057144000  | -1.996480000 | -0.333121000 |
| 1 | 2.931377000  | -0.614750000 | -1.043433000 |
| 1 | 3.012273000  | -0.908866000 | 0.720695000  |
| 6 | -2.365529000 | -0.958930000 | 0.166466000  |
| 1 | -2.056886000 | -1.996485000 | 0.333859000  |
| 1 | -2.931489000 | -0.614492000 | 1.043167000  |
| 1 | -3.011883000 | -0.909559000 | -0.720824000 |
| 6 | -1.500772000 | 1.307070000  | -0.251505000 |
| 1 | -0.741718000 | 1.777939000  | -0.881872000 |
| 1 | -2.457677000 | 1.357756000  | -0.785086000 |
| 1 | -1.603440000 | 1.852910000  | 0.696961000  |
| 7 | 1.195982000  | -0.102803000 | 0.024510000  |
| 7 | -1.195888000 | -0.102854000 | -0.024513000 |

### Iminium ion from the reaction of triazinane radical C1

#### In MeCN

|                                             |              |
|---------------------------------------------|--------------|
| SCF Done: E(RwB97XD)                        | -400.7625582 |
| Zero-point correction                       | 0.212014     |
| Thermal correction to Energy                | 0.221761     |
| Thermal correction to Enthalpy              | 0.222705     |
| Thermal correction to Gibbs Free Energy     | 0.177563     |
| Sum of electronic and zero-point Energies   | -400.550544  |
| Sum of electronic and thermal Energies      | -400.540798  |
| Sum of electronic and thermal Enthalpies    | -400.539853  |
| Sum of electronic and thermal Free Energies | -400.584995  |

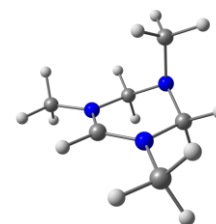

|   |              |              |              |
|---|--------------|--------------|--------------|
| 6 | 1.174550000  | 0.733483000  | 0.700073000  |
| 6 | 0.000000000  | -1.168726000 | -0.199477000 |
| 6 | -1.174550000 | 0.733483000  | 0.700073000  |
| 1 | 0.000000000  | -2.151327000 | -0.679261000 |
| 1 | 1.245930000  | 0.599821000  | 1.790814000  |
| 1 | 2.076154000  | 1.253172000  | 0.351784000  |
| 1 | -2.076154000 | 1.253171000  | 0.351785000  |
| 1 | -1.245929000 | 0.599821000  | 1.790814000  |
| 6 | 2.425175000  | -1.263321000 | -0.206669000 |
| 1 | 2.246615000  | -2.244777000 | -0.660521000 |
| 1 | 3.022768000  | -0.650920000 | -0.895965000 |
| 1 | 2.983059000  | -1.399864000 | 0.730292000  |
| 6 | -2.425174000 | -1.263322000 | -0.206669000 |
| 1 | -3.022768000 | -0.650921000 | -0.895965000 |
| 1 | -2.246615000 | -2.244777000 | -0.660521000 |
| 1 | -2.983059000 | -1.399865000 | 0.730292000  |
| 7 | 0.000000000  | 1.471433000  | 0.352578000  |
| 7 | 1.158622000  | -0.605568000 | 0.067243000  |
| 7 | -1.158622000 | -0.605568000 | 0.067243000  |
| 6 | -0.000001000 | 2.011267000  | -1.002503000 |
| 1 | -0.888637000 | 2.641169000  | -1.140479000 |
| 1 | 0.888635000  | 2.641169000  | -1.140479000 |
| 1 | -0.000001000 | 1.234862000  | -1.790994000 |

## Iminium ion from the reaction of triazinane radical C3

## In MeCN

|                                             |             |
|---------------------------------------------|-------------|
| SCF Done: E(RwB97XD)                        | -400.757463 |
| Zero-point correction                       | 0.211722    |
| Thermal correction to Energy                | 0.221566    |
| Thermal correction to Enthalpy              | 0.22251     |
| Thermal correction to Gibbs Free Energy     | 0.177208    |
| Sum of electronic and zero-point Energies   | -400.545741 |
| Sum of electronic and thermal Energies      | -400.535897 |
| Sum of electronic and thermal Enthalpies    | -400.534953 |
| Sum of electronic and thermal Free Energies | -400.580255 |

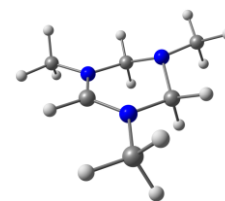

|   |              |              |              |
|---|--------------|--------------|--------------|
| 6 | 1.184740000  | -0.718823000 | 0.271487000  |
| 6 | -1.195932000 | -0.699683000 | 0.271981000  |
| 6 | 0.010733000  | 1.339609000  | -0.100694000 |
| 1 | -2.080438000 | -1.107921000 | -0.236303000 |
| 1 | 1.310880000  | -0.879748000 | 1.363892000  |
| 1 | 2.062342000  | -1.140972000 | -0.237383000 |
| 1 | 0.019330000  | 2.414556000  | -0.296869000 |
| 1 | -1.323939000 | -0.858430000 | 1.364463000  |
| 7 | 1.162938000  | 0.720096000  | 0.016587000  |
| 7 | -0.010522000 | -1.308673000 | -0.267854000 |
| 7 | -1.151170000 | 0.738555000  | 0.016715000  |
| 6 | 2.435787000  | 1.419082000  | -0.065087000 |
| 1 | 3.011618000  | 1.050876000  | -0.925330000 |
| 1 | 2.261835000  | 2.494662000  | -0.179472000 |
| 1 | 3.009327000  | 1.247276000  | 0.856126000  |
| 6 | -0.022316000 | -2.756919000 | -0.190256000 |
| 1 | -0.913925000 | -3.144507000 | -0.701970000 |
| 1 | 0.864340000  | -3.158837000 | -0.699491000 |
| 1 | -0.026848000 | -3.136032000 | 0.851119000  |
| 6 | -2.412672000 | 1.457624000  | -0.065302000 |
| 1 | -2.221996000 | 2.530326000  | -0.179802000 |
| 1 | -2.994160000 | 1.098591000  | -0.925657000 |
| 1 | -2.989124000 | 1.294968000  | 0.855763000  |

Chloride anion (Cl<sup>-</sup>)

## In MeCN

|                                             |              |
|---------------------------------------------|--------------|
| SCF Done: E(RwB97XD)                        | -460.1984759 |
| Zero-point correction                       | 0.000000     |
| Thermal correction to Energy                | 0.001416     |
| Thermal correction to Enthalpy              | 0.00236      |
| Thermal correction to Gibbs Free Energy     | -0.015023    |
| Sum of electronic and zero-point Energies   | -460.198476  |
| Sum of electronic and thermal Energies      | -460.19706   |
| Sum of electronic and thermal Enthalpies    | -460.196115  |
| Sum of electronic and thermal Free Energies | -460.213499  |

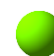

|    |             |             |             |
|----|-------------|-------------|-------------|
| 17 | 0.000000000 | 0.000000000 | 0.000000000 |
|----|-------------|-------------|-------------|

Transition state for the interconversion of **C1** and **C3** (nitrogen lone pair inversion)

## In MeCN

|                                             |              |
|---------------------------------------------|--------------|
| SCF Done: E(UWB97XD)                        | -400.8263268 |
| Zero-point correction                       | 0.206447     |
| Thermal correction to Energy                | 0.215858     |
| Thermal correction to Enthalpy              | 0.216802     |
| Thermal correction to Gibbs Free Energy     | 0.171869     |
| Sum of electronic and zero-point Energies   | -400.61988   |
| Sum of electronic and thermal Energies      | -400.610469  |
| Sum of electronic and thermal Enthalpies    | -400.609524  |
| Sum of electronic and thermal Free Energies | -400.654458  |

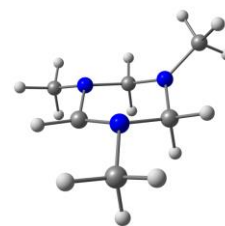

|   |              |              |              |
|---|--------------|--------------|--------------|
| 6 | -1.167150000 | -0.699911000 | 0.426895000  |
| 6 | -0.060023000 | 1.359029000  | -0.113041000 |
| 6 | 1.220291000  | -0.597752000 | 0.426916000  |
| 1 | -0.102241000 | 2.347532000  | -0.587717000 |
| 1 | -1.280592000 | -0.529757000 | 1.528880000  |
| 1 | -2.018540000 | -1.316081000 | 0.101789000  |
| 1 | 2.120159000  | -1.139122000 | 0.098843000  |
| 1 | 1.320788000  | -0.422656000 | 1.529225000  |
| 6 | -2.457376000 | 1.306137000  | -0.028211000 |
| 1 | -2.466882000 | 2.234591000  | -0.617895000 |
| 1 | -3.313476000 | 0.692354000  | -0.346916000 |
| 1 | -2.605685000 | 1.577554000  | 1.037894000  |
| 6 | 2.333869000  | 1.510703000  | -0.026472000 |
| 1 | 3.238830000  | 0.973418000  | -0.348228000 |
| 1 | 2.263405000  | 2.438471000  | -0.612918000 |
| 1 | 2.460411000  | 1.790244000  | 1.040326000  |
| 7 | 0.056619000  | -1.360285000 | 0.125568000  |
| 7 | -1.227269000 | 0.587164000  | -0.261249000 |
| 7 | 1.169184000  | 0.689876000  | -0.259846000 |
| 6 | 0.126297000  | -2.691014000 | -0.408302000 |
| 1 | 0.293203000  | -3.476030000 | 0.357081000  |
| 1 | -0.812357000 | -2.935808000 | -0.928001000 |
| 1 | 0.937786000  | -2.775136000 | -1.150381000 |

Transition state for the interconversion of **C2** to **C3** (nitrogen lone pair inversion)

## In MeCN

|                                             |              |
|---------------------------------------------|--------------|
| SCF Done: E(UWB97XD)                        | -400.8289093 |
| Zero-point correction                       | 0.206472     |
| Thermal correction to Energy                | 0.215812     |
| Thermal correction to Enthalpy              | 0.216756     |
| Thermal correction to Gibbs Free Energy     | 0.171982     |
| Sum of electronic and zero-point Energies   | -400.622438  |
| Sum of electronic and thermal Energies      | -400.613097  |
| Sum of electronic and thermal Enthalpies    | -400.612153  |
| Sum of electronic and thermal Free Energies | -400.656927  |

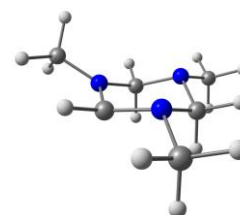

|   |              |              |              |
|---|--------------|--------------|--------------|
| 6 | 1.307457000  | 0.285162000  | 0.399314000  |
| 6 | -0.464546000 | -1.335022000 | 0.224225000  |
| 6 | -0.919605000 | 1.017381000  | 0.040907000  |
| 1 | -0.755688000 | -2.358050000 | -0.036695000 |
| 1 | 1.267449000  | 0.502264000  | 1.498612000  |
| 1 | 2.350597000  | 0.416125000  | 0.075726000  |
| 1 | -1.551531000 | 1.721480000  | -0.523578000 |

|   |              |              |              |
|---|--------------|--------------|--------------|
| 1 | -1.076345000 | 1.236227000  | 1.134822000  |
| 6 | 1.868244000  | -2.051180000 | -0.243436000 |
| 1 | 1.387327000  | -3.037310000 | -0.294738000 |
| 1 | 2.316854000  | -1.844377000 | -1.233852000 |
| 1 | 2.688563000  | -2.120492000 | 0.491488000  |
| 6 | -2.734575000 | -0.566494000 | 0.017274000  |
| 1 | -3.354877000 | 0.144404000  | -0.548817000 |
| 1 | -3.013078000 | -1.583752000 | -0.294856000 |
| 1 | -2.980544000 | -0.461159000 | 1.094658000  |
| 7 | 0.465126000  | 1.224917000  | -0.322702000 |
| 7 | 0.894135000  | -1.061629000 | 0.134187000  |
| 7 | -1.337887000 | -0.332739000 | -0.267121000 |
| 6 | 0.876149000  | 2.593932000  | -0.105996000 |
| 1 | 0.247850000  | 3.273957000  | -0.699898000 |
| 1 | 0.805033000  | 2.906551000  | 0.959370000  |
| 1 | 1.920032000  | 2.727624000  | -0.426520000 |

### Me<sub>2</sub>NCHNMe<sub>2</sub> radical, C<sub>s</sub> symmetry (T3-C<sub>s</sub>)

#### In MeCN

|                                             |              |
|---------------------------------------------|--------------|
| SCF Done: E(UwB97XD)                        | -307.4636667 |
| Zero-point correction                       | 0.181608     |
| Thermal correction to Energy                | 0.190352     |
| Thermal correction to Enthalpy              | 0.191296     |
| Thermal correction to Gibbs Free Energy     | 0.148015     |
| Sum of electronic and zero-point Energies   | -307.282059  |
| Sum of electronic and thermal Energies      | -307.273314  |
| Sum of electronic and thermal Enthalpies    | -307.27237   |
| Sum of electronic and thermal Free Energies | -307.315652  |

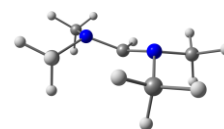

|   |              |              |              |
|---|--------------|--------------|--------------|
| 6 | 0.223748000  | 1.278251000  | 1.612952000  |
| 6 | -0.334241000 | -0.504438000 | 0.000000000  |
| 6 | 0.223748000  | 1.278251000  | -1.612952000 |
| 1 | -0.643591000 | -1.554306000 | 0.000000000  |
| 1 | -0.793248000 | 1.721335000  | 1.607803000  |
| 1 | 0.636204000  | 1.380818000  | 2.626586000  |
| 1 | 0.636204000  | 1.380818000  | -2.626586000 |
| 1 | -0.793248000 | 1.721335000  | -1.607803000 |
| 6 | -0.217502000 | -0.975187000 | 2.330420000  |
| 1 | -0.067833000 | -2.034004000 | 2.074824000  |
| 1 | 0.373810000  | -0.760206000 | 3.232341000  |
| 1 | -1.288369000 | -0.831556000 | 2.584423000  |
| 6 | -0.217502000 | -0.975187000 | -2.330420000 |
| 1 | 0.373810000  | -0.760206000 | -3.232341000 |
| 1 | -0.067833000 | -2.034004000 | -2.074824000 |
| 1 | -1.288369000 | -0.831556000 | -2.584423000 |
| 7 | 0.223748000  | -0.125776000 | 1.239499000  |
| 7 | 0.223748000  | -0.125776000 | -1.239499000 |
| 1 | 0.860235000  | 1.876131000  | 0.950867000  |
| 1 | 0.860235000  | 1.876131000  | -0.950867000 |

### CF<sub>2</sub>Cl radical

#### In MeCN

|                                         |              |
|-----------------------------------------|--------------|
| SCF Done: E(UwB97XD)                    | -697.5192049 |
| Zero-point correction                   | 0.010592     |
| Thermal correction to Energy            | 0.014318     |
| Thermal correction to Enthalpy          | 0.015263     |
| Thermal correction to Gibbs Free Energy | -0.017158    |

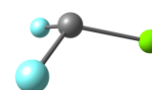

|                                             |                                       |
|---------------------------------------------|---------------------------------------|
| Sum of electronic and zero-point Energies   | -697.508613                           |
| Sum of electronic and thermal Energies      | -697.504886                           |
| Sum of electronic and thermal Enthalpies    | -697.503942                           |
| Sum of electronic and thermal Free Energies | -697.536363                           |
| 6                                           | 0.430750000 -0.000001000 0.325660000  |
| 9                                           | 1.056121000 -1.079377000 -0.079433000 |
| 9                                           | 1.056121000 1.079377000 -0.079433000  |
| 17                                          | -1.270275000 0.000000000 -0.030833000 |

## References:

1. L. I. Panferova, V. V. Levin, M. I. Struchkova and A. D. Dilman, *Chem. Commun.*, 2019, **55**, 1314–1317.
2. E. Voutyritsa, N. F. Nikitas, M. K. Apostolopoulou, A. D. D. Gerogiannopoulou and C. G. Kokotos, *Synthesis*, 2018, **50**, 3395–3401.
3. S. K. Ginotra, J. A. Friest and D. B. Berkowitz, *Org. Lett.*, 2012, **14**, 968–971.
4. H. Sharma, S. Santra, J. Debnath, T. Antonio, M. Reith and A. Dutta, *Bioorg. Med. Chem.*, 2014, **22**, 311–324.
5. R. Hoffmann and R. Brückner, *Chem. Ber.*, 1992, **125**, 2731–2739.
6. D. He, Y. Guo, Q.-Y. Chen, H. Yang and T. Lv, *J. Fluorine Chem.*, 2019, **222-223**, 1–7.
7. H. K. A. C. Coolen, J. A. M. Meeuwis, P. W. M. N. van Leeuwen and R. J. M. Nolte, *J. Am. Chem. Soc.*, 1995, **117**, 11906–11913.
8. M. Warsitz and S. Doye, *Chem. Eur. J.*, 2020, **26**, 15121–15125.
9. M. D. Kosobokov, M. O. Zubkov, V. V. Levin, V. A. Kokorekin and A. D. Dilman, *Chem. Commun.*, 2020, **56**, 9453–9456.
10. J. C. Siu, J. B. Parry and S. Lin, *J. Am. Chem. Soc.*, 2019, **141**, 2825–2831.
11. M. Yoshida, M. Higuchi and K. Shishido, *Org. Lett.*, 2009, **11**, 4752–4755.
12. A. E. Solinski, A. B. Koval, R. S. Brzozowski, K. R. Morrison, A. J. Fraboni, C. E. Carson, A. R. Eshraghi, G. Zhou, R. G. Quivey, Jr., V. A. Voelz, B. A. Buttaro and W. M. Wuest, *J. Am. Chem. Soc.*, 2017, **139**, 7188–7191.
13. C. Chen, T. R. Dugan, W. W. Brennessel, D. J. Weix and P. L. Holland, *J. Am. Chem. Soc.*, 2014, **136**, 945–955.
14. H. J. Bestmann and K. Li, *Chem. Ber.*, 1982, **115**, 828–831.
15. M. E. Scheller and B. Frei, *Helv. Chim. Acta*, 1986, **69**, 44–52.
16. Y. Yamasaki, T. Kumagai, S. Kanno, F. Kakiuchi and T. Kochi, *J. Org. Chem.*, 2018, **83**, 9322–9333.
17. C. Courtens, M. Risseeuw, G. Caljon, L. Maes, A. Martin and S. Van Calenbergh, *Bioorg. Med. Chem.*, 2019, **27**, 729–747.
18. P. Sušnik and G. Hilt, *Organometallics*, 2014, **33**, 5907–5910.
19. R. W. Hoffmann, E. Haerberlin and T. Rohde, *Synthesis*, 2002, **2002**, 207–212.
20. F. Ratsch and H.-G. Schmalz, *Synlett*, 2018, **29**, 785–792.
21. D. R. Jewell, L. Mathew and J. Warkentin, *Can. J. Chem.*, 1987, **65**, 311–315.
22. Z. Lu, X. Zeng, G. B. Hammond and B. Xu, *J. Am. Chem. Soc.*, 2017, **139**, 18202–18205.
23. A. M. Kawamoto and M. Wills, *J. Chem. Soc., Perkin Trans. 1*, 2001, DOI: 10.1039/B102895M, 1916–1928.
24. S. A. Green, J. L. M. Matos, A. Yagi and R. A. Shenvi, *J. Am. Chem. Soc.*, 2016, **138**, 12779–12782.

25. S. Ge, S. I. Arlow, M. G. Mormino and J. F. Hartwig, *J. Am. Chem. Soc.*, 2014, **136**, 14401–14404.
26. Y. Hayashi, H. Gotoh, T. Tamura, H. Yamaguchi, R. Masui and M. Shoji, *J. Am. Chem. Soc.*, 2005, **127**, 16028–16029.
27. H. Huang, X. Li, C. Yu, Y. Zhang, P. S. Mariano and W. Wang, *Angew. Chem. Int. Ed.*, 2017, **56**, 1500–1505.
28. A. Flores-Parra and S. A. Sánchez-Ruíz, *Heterocycles*, 1999, **51**, 2079–2092.
29. V. S. Kostromitin, V. V. Levin and A. D. Dilman, *J. Org. Chem.* **2022**, DOI: 10.1021/acs.joc.2c00712
30. V. S. Kostromitin, A. A. Zemtsov, V. A. Kokorekin, V. V. Levin and A. D. Dilman, *Chem. Commun.*, 2021, **57**, 5219–5222.
31. M. Poyatos, A. Prades, S. Gonell, D. G. Gusev and E. Peris, *Chem. Sci.*, 2012, **3**, 1300–1303.
32. Gaussian 09, Revision D.01, M. J. Frisch, G. W. Trucks, H. B. Schlegel, G. E. Scuseria, M. A. Robb, J. R. Cheeseman, G. Scalmani, V. Barone, B. Mennucci, G. A. Petersson, H. Nakatsuji, M. Caricato, X. Li, H. P. Hratchian, A. F. Izmaylov, J. Bloino, G. Zheng, J. L. Sonnenberg, M. Hada, M. Ehara, K. Toyota, R. Fukuda, J. Hasegawa, M. Ishida, T. Nakajima, Y. Honda, O. Kitao, H. Nakai, T. Vreven, J. Montgomery, J. A., J. E. Peralta, F. Ogliaro, M. Bearpark, J. J. Heyd, E. Brothers, K. N. Kudin, V. N. Staroverov, T. Keith, R. Kobayashi, J. Normand, K. Raghavachari, A. Rendell, J. C. Burant, S. S. Iyengar, J. Tomasi, M. Cossi, N. Rega, J. M. Millam, M. Klene, J. E. Knox, J. B. Cross, V. Bakken, C. Adamo, J. Jaramillo, R. Gomperts, R. E. Stratmann, O. Yazyev, A. J. Austin, R. Cammi, C. Pomelli, J. W. Ochterski, R. L. Martin, K. Morokuma, V. G. Zakrzewski, G. A. Voth, P. Salvador, J. J. Dannenberg, S. Dapprich, A. D. Daniels, O. Farkas, J. B. Foresman, J. V. Ortiz, J. Cioslowski and D. J. Fox, *Gaussian, Inc., Wallingford CT*, 2013.
33. V. Barone and M. Cossi, *J. Phys. Chem. A*, 1998, **102**, 1995–2001.
34. M. Cossi, N. Rega, G. Scalmani and V. Barone, *J. Comput. Chem.*, 2003, **24**, 669–681.
35. F. Weinhold, C. R. Landis, *Discovering Chemistry With Natural Bond Orbitals*, John Wiley & Sons, Hoboken, New Jersey, 2012.
36. T. Constantin, M. Zanini, A. Regni, N. S. Sheikh, F. Julia and D. Leonori, *Science*, 2020, **367**, 1021–1026.
37. N. Sanosa, B. Peñín, D. Sampedro and I. Funes-Ardoiz, *Eur. J. Org. Chem.*, 2022, **2022**, e202200420.

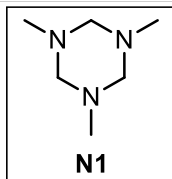

$^1\text{H}$  NMR (300 MHz,  $\text{CDCl}_3$ )

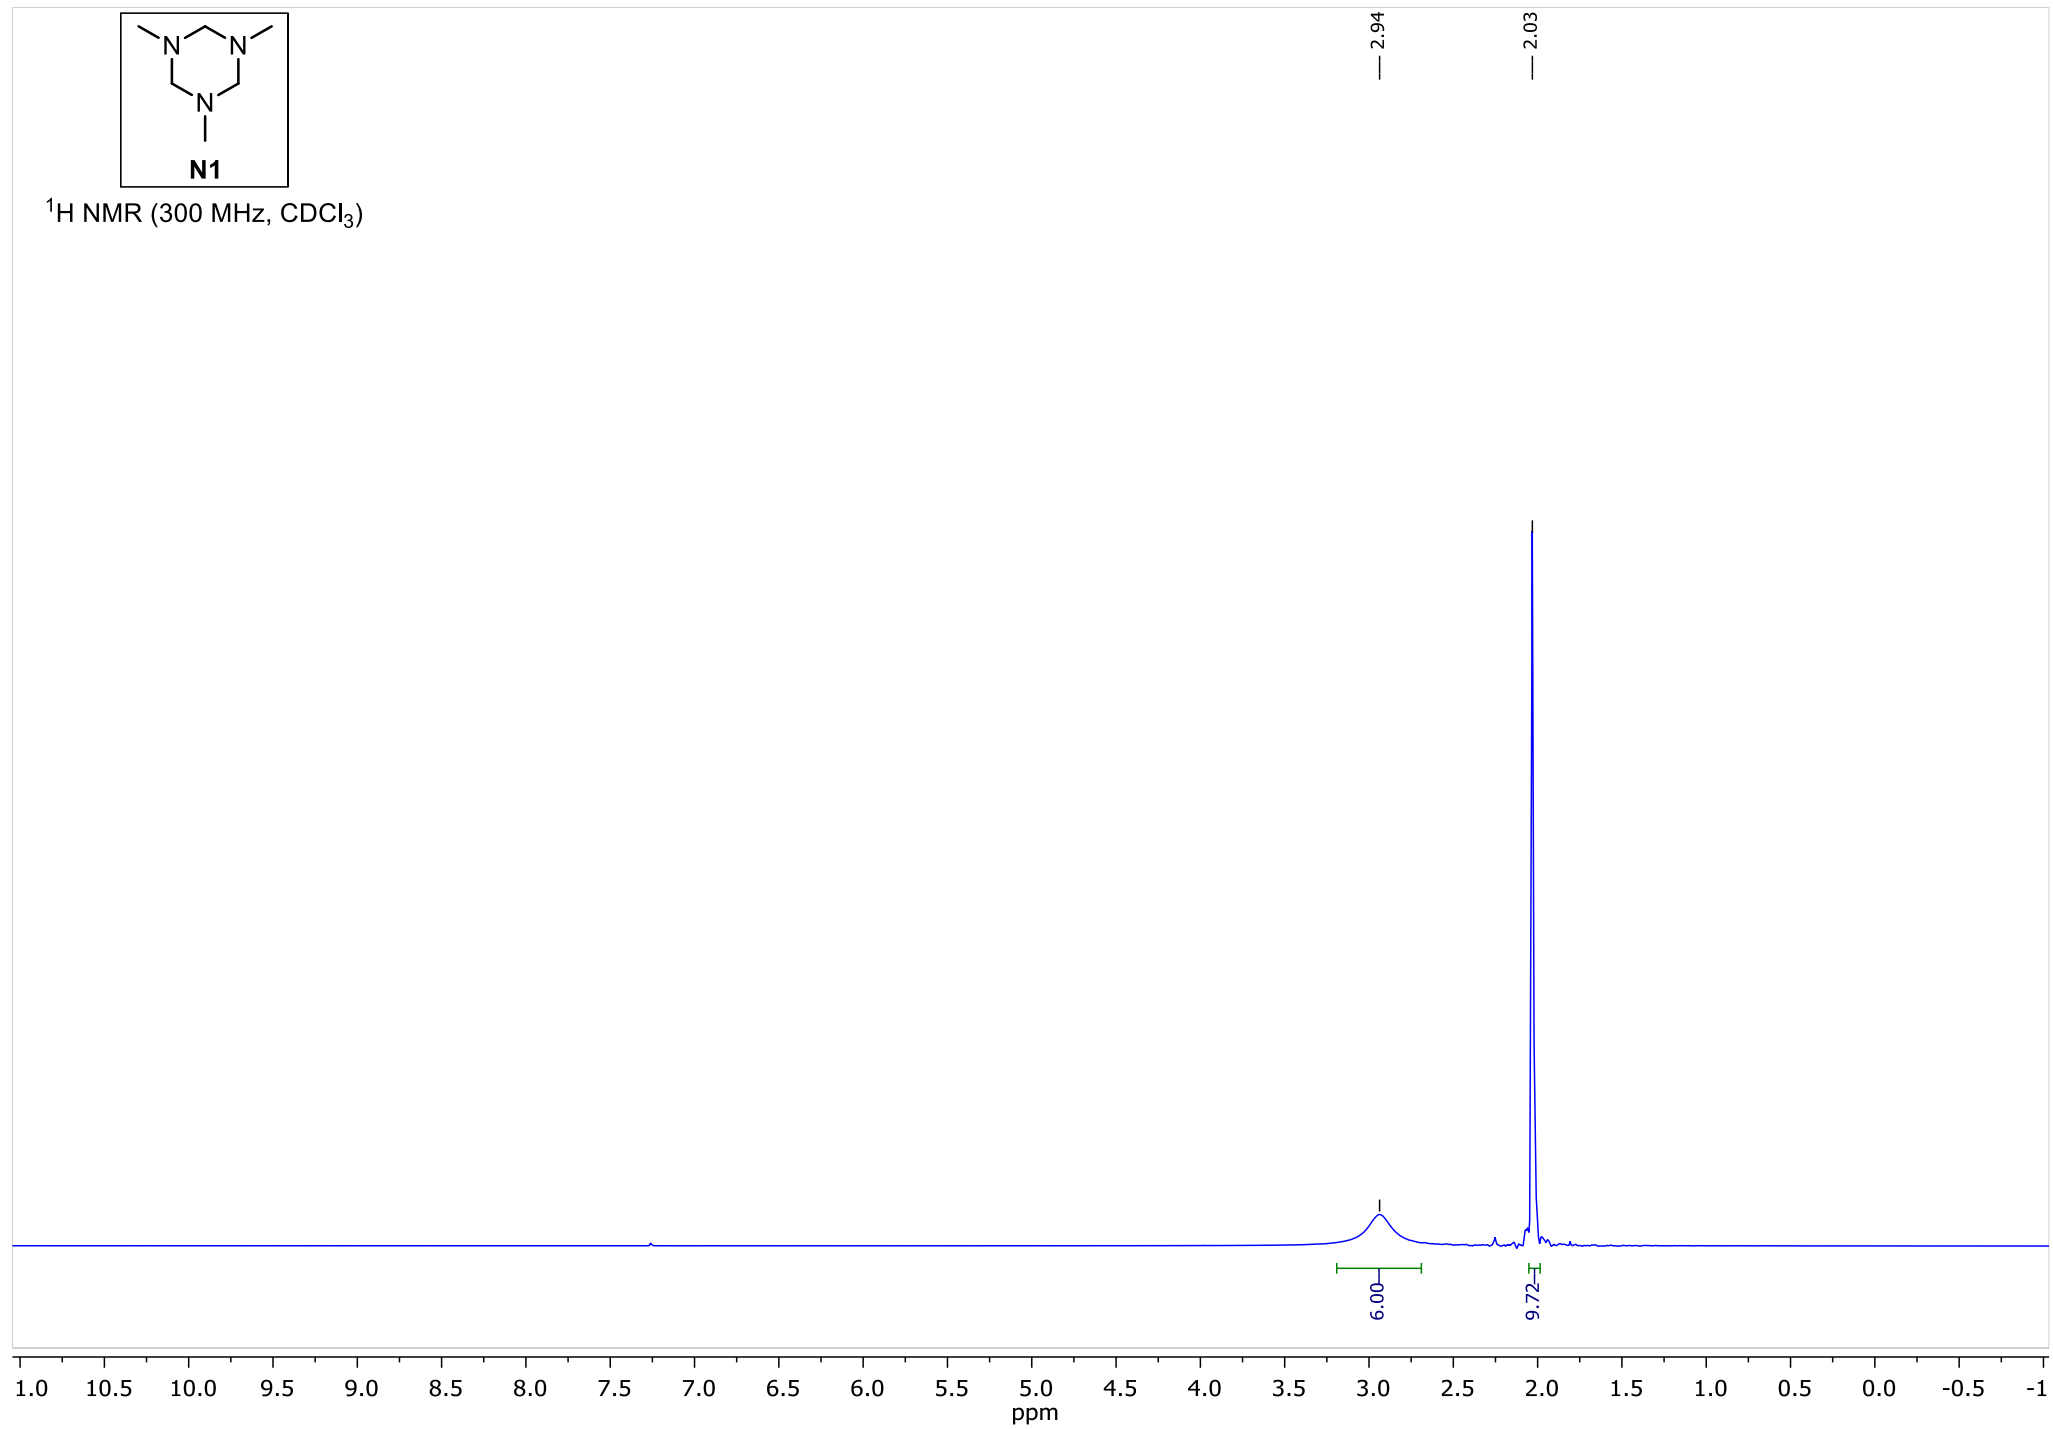



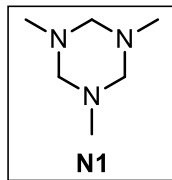

$^{13}\text{C}\{^1\text{H}\}$  NMR (75 MHz,  $\text{CDCl}_3$ )

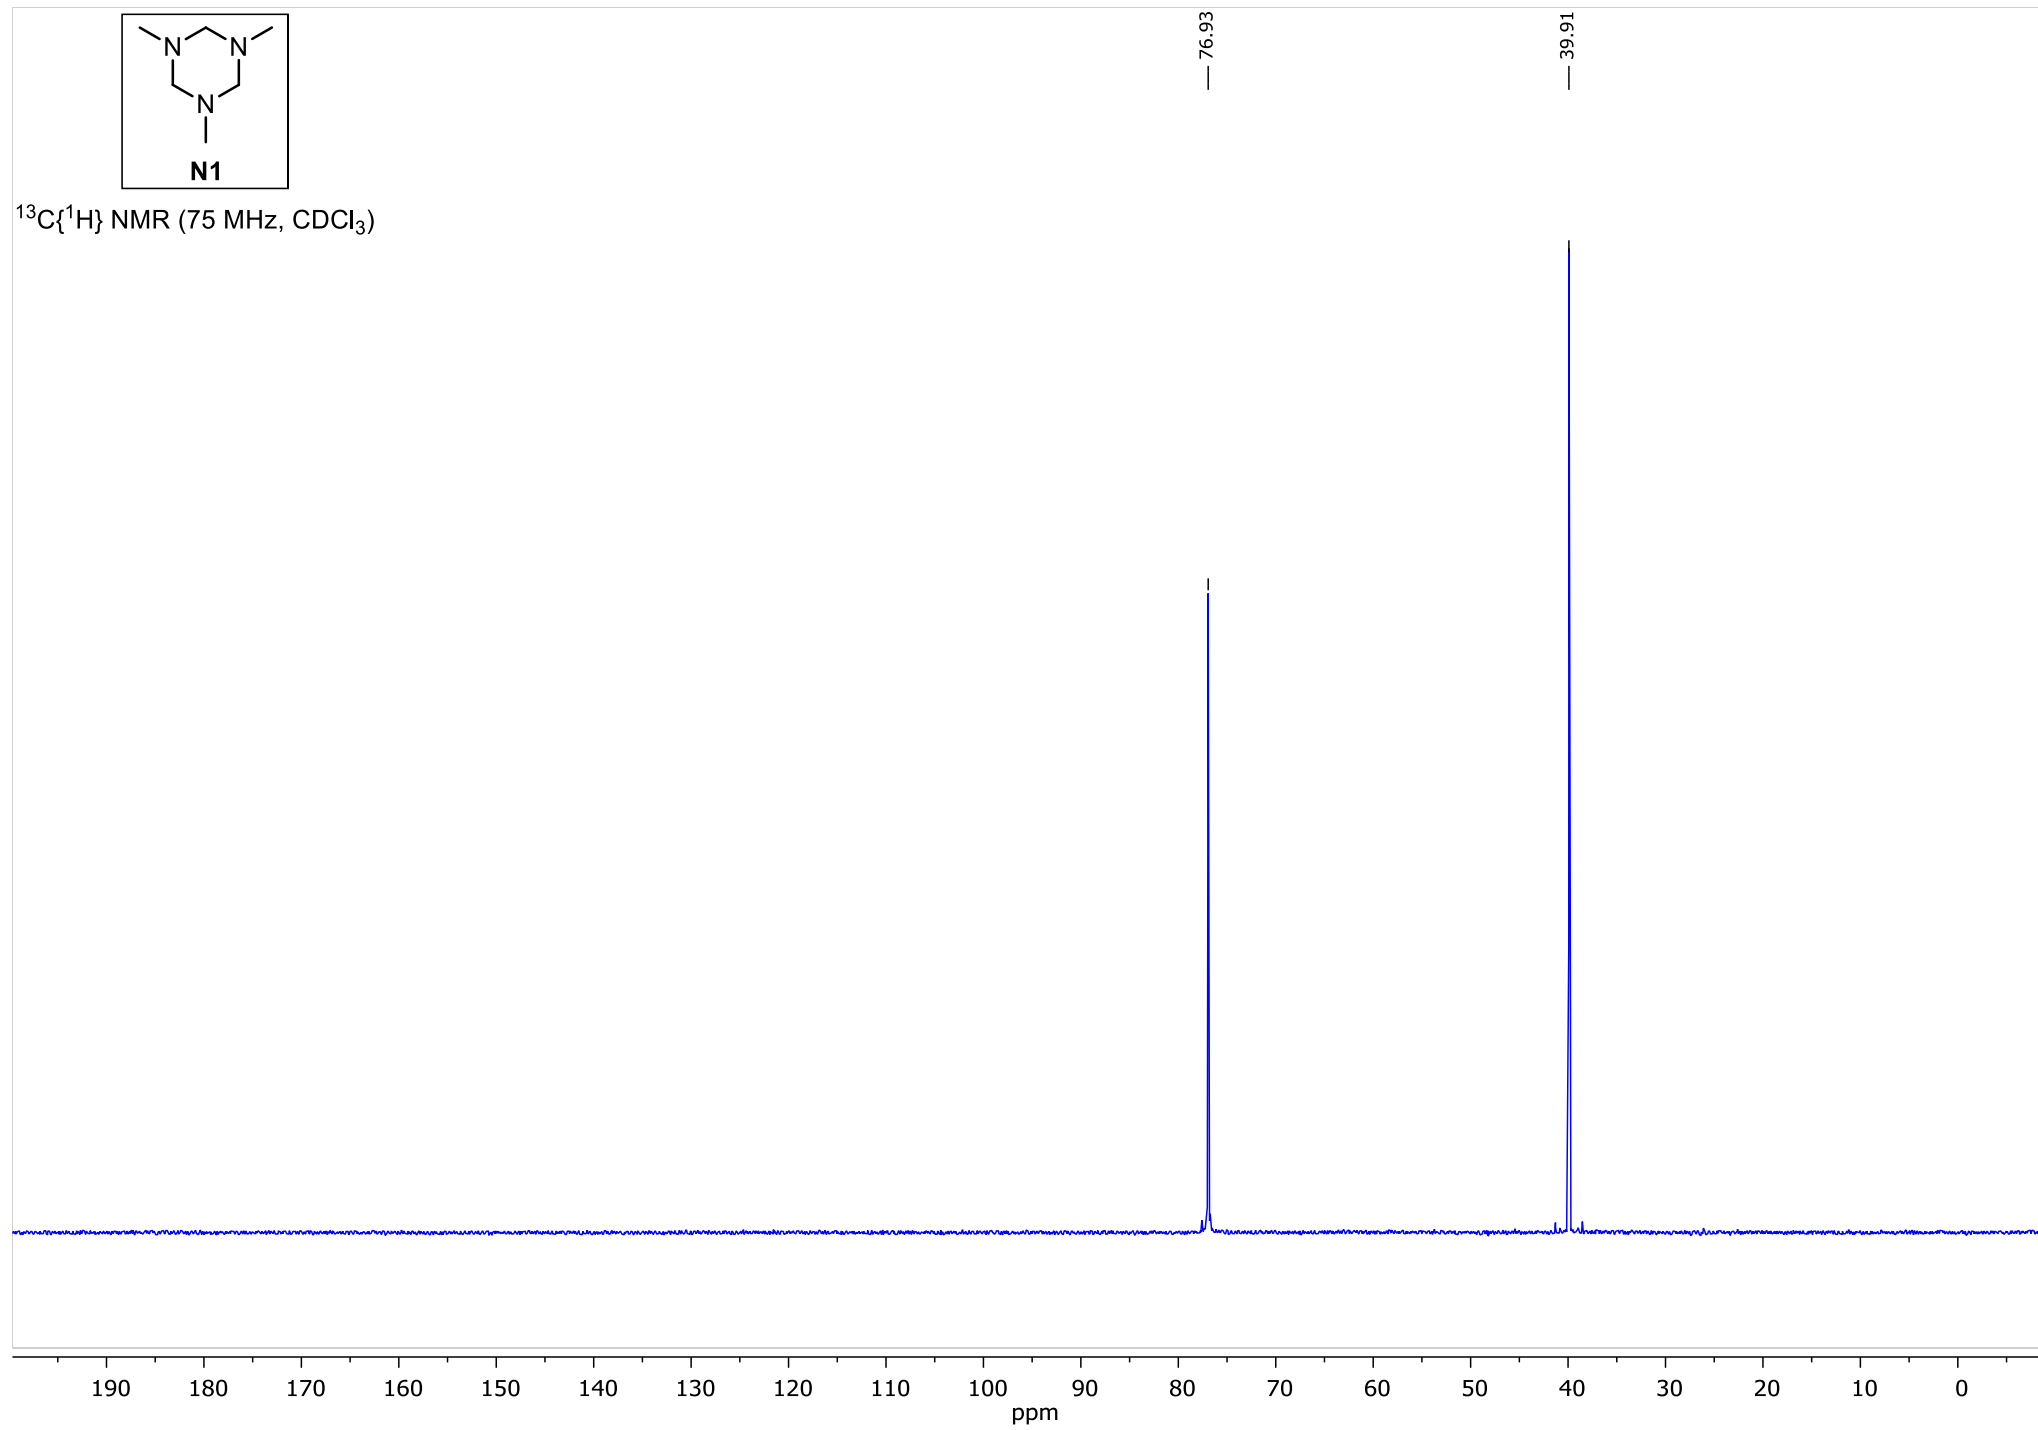

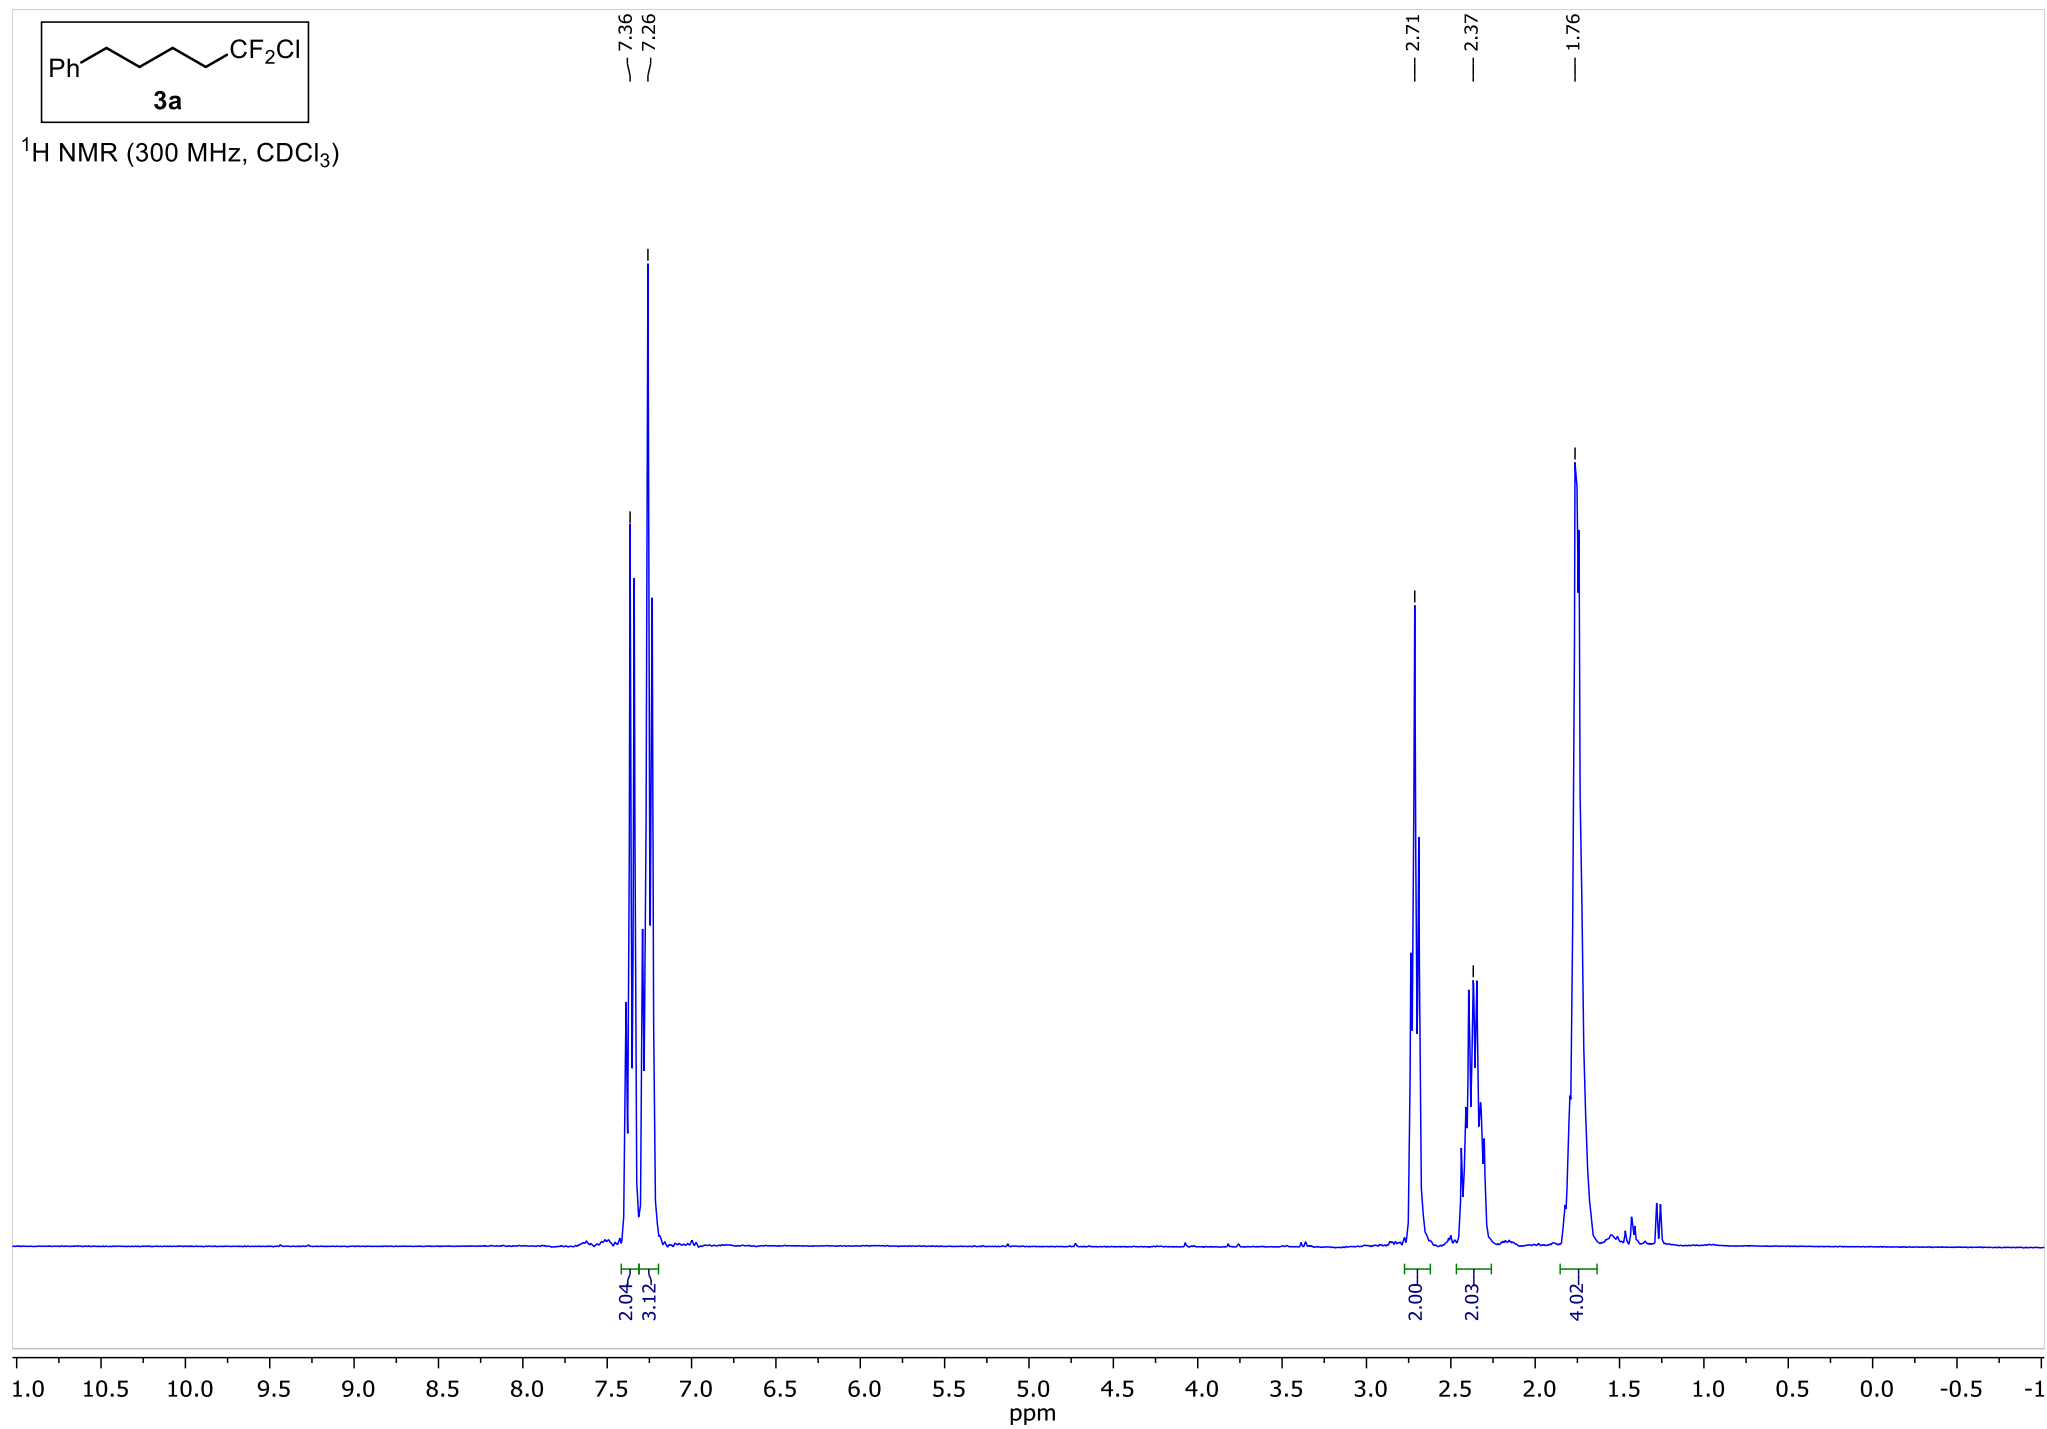

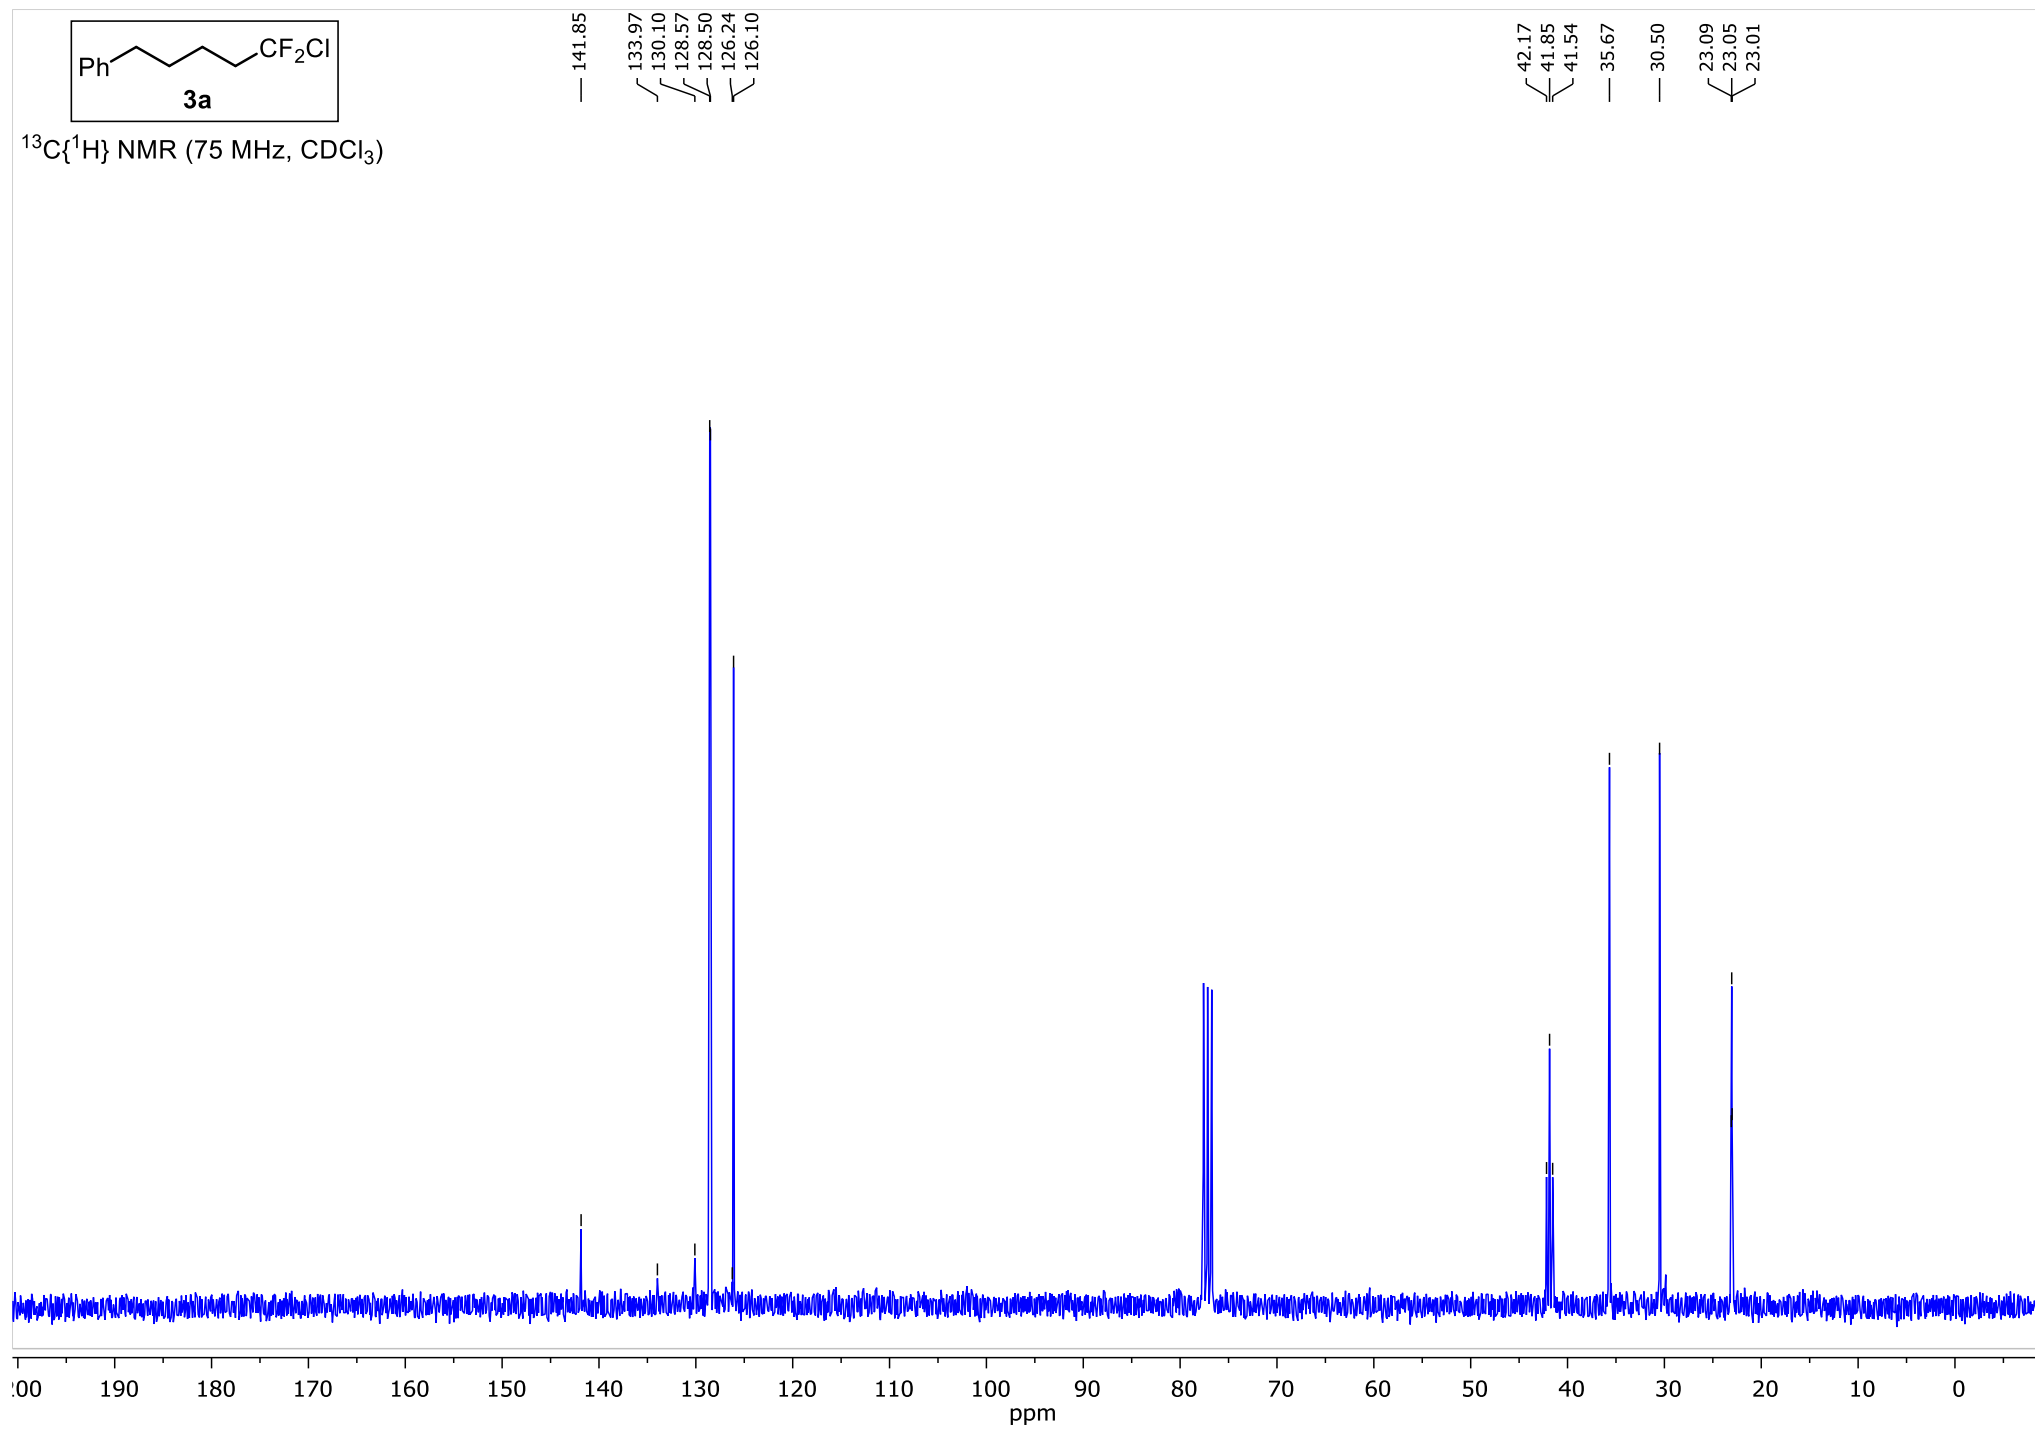

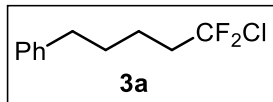

$^{19}\text{F}$  NMR (282 MHz,  $\text{CDCl}_3$ )

-51.25  
-51.29  
-51.34

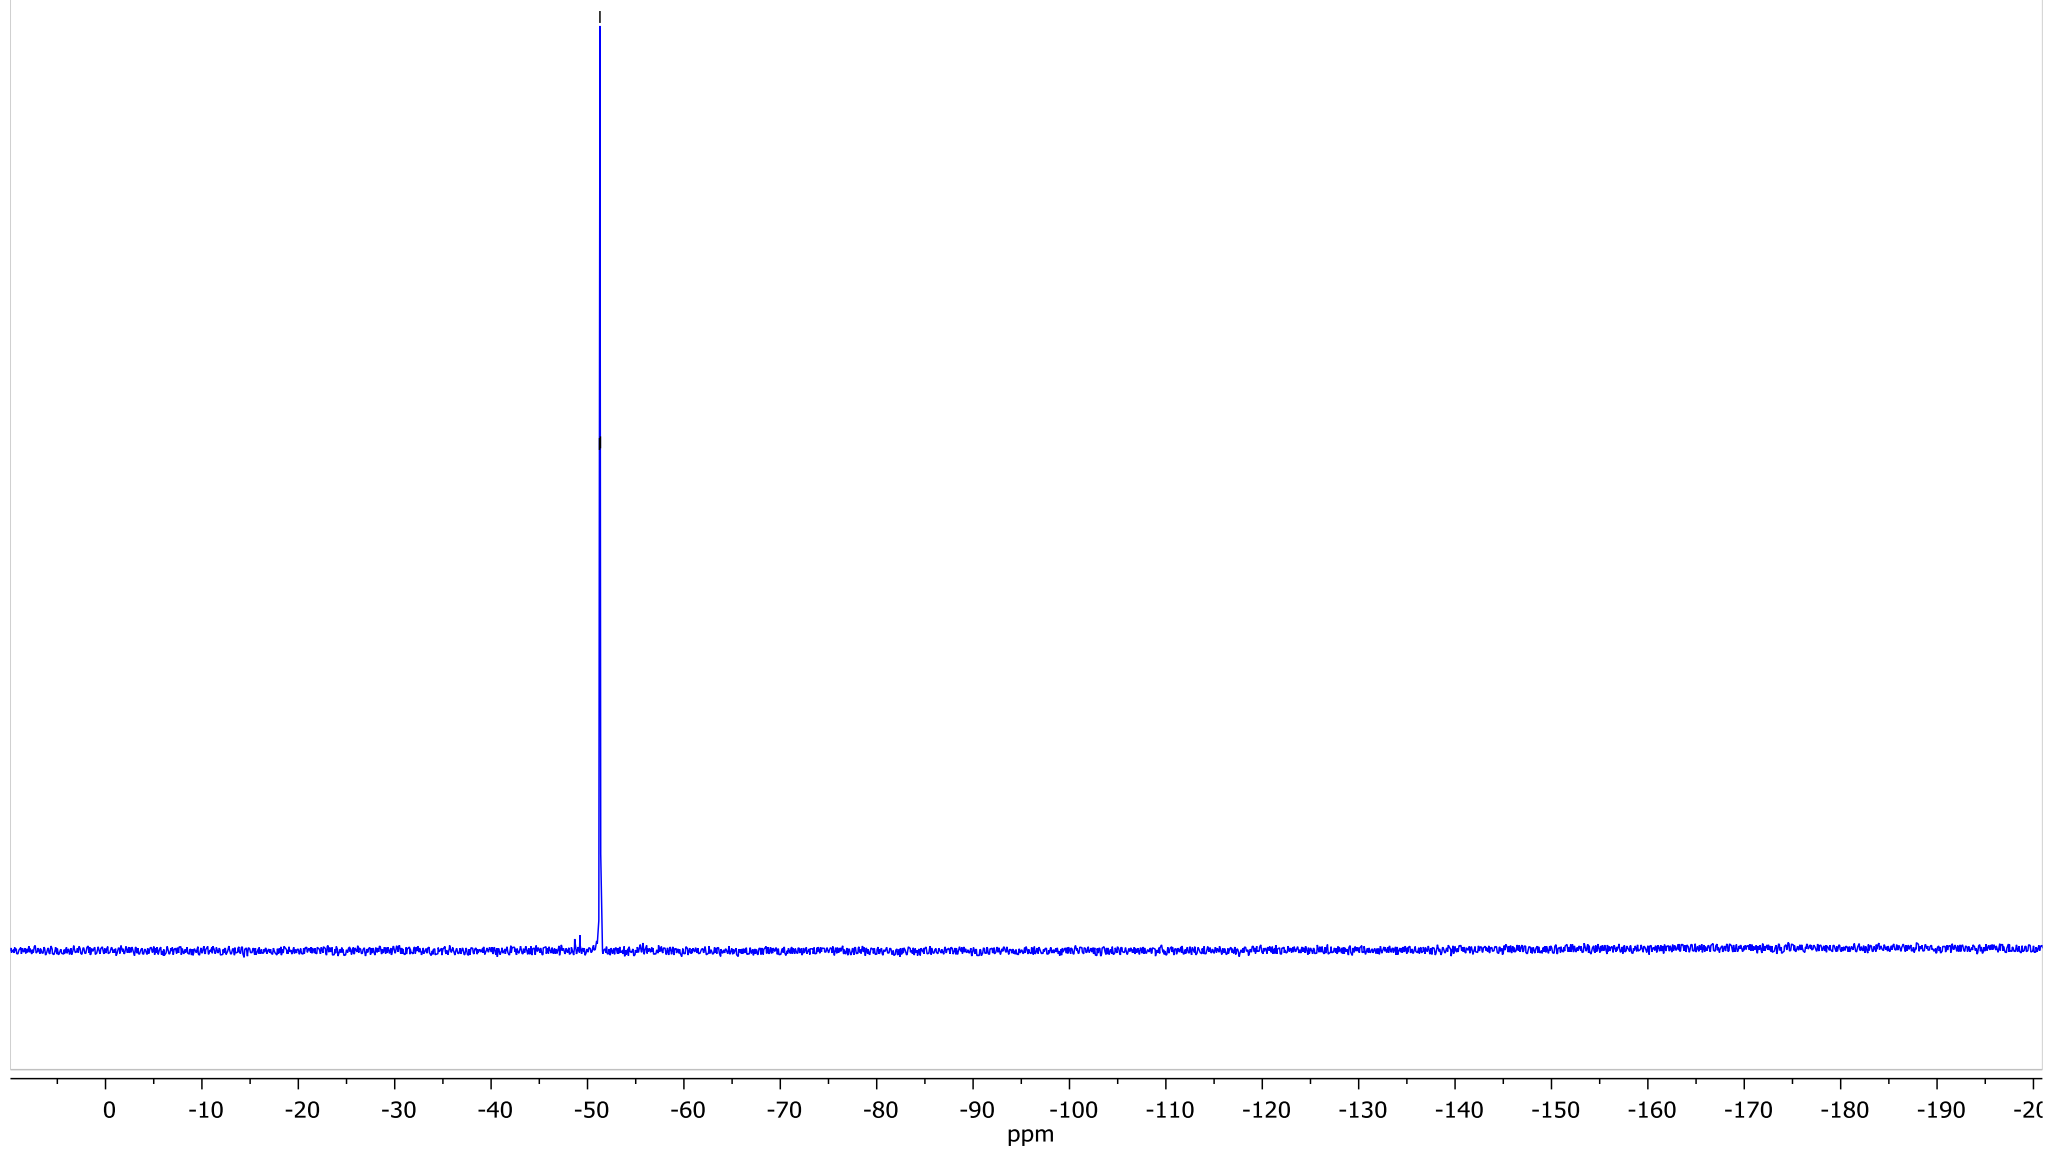

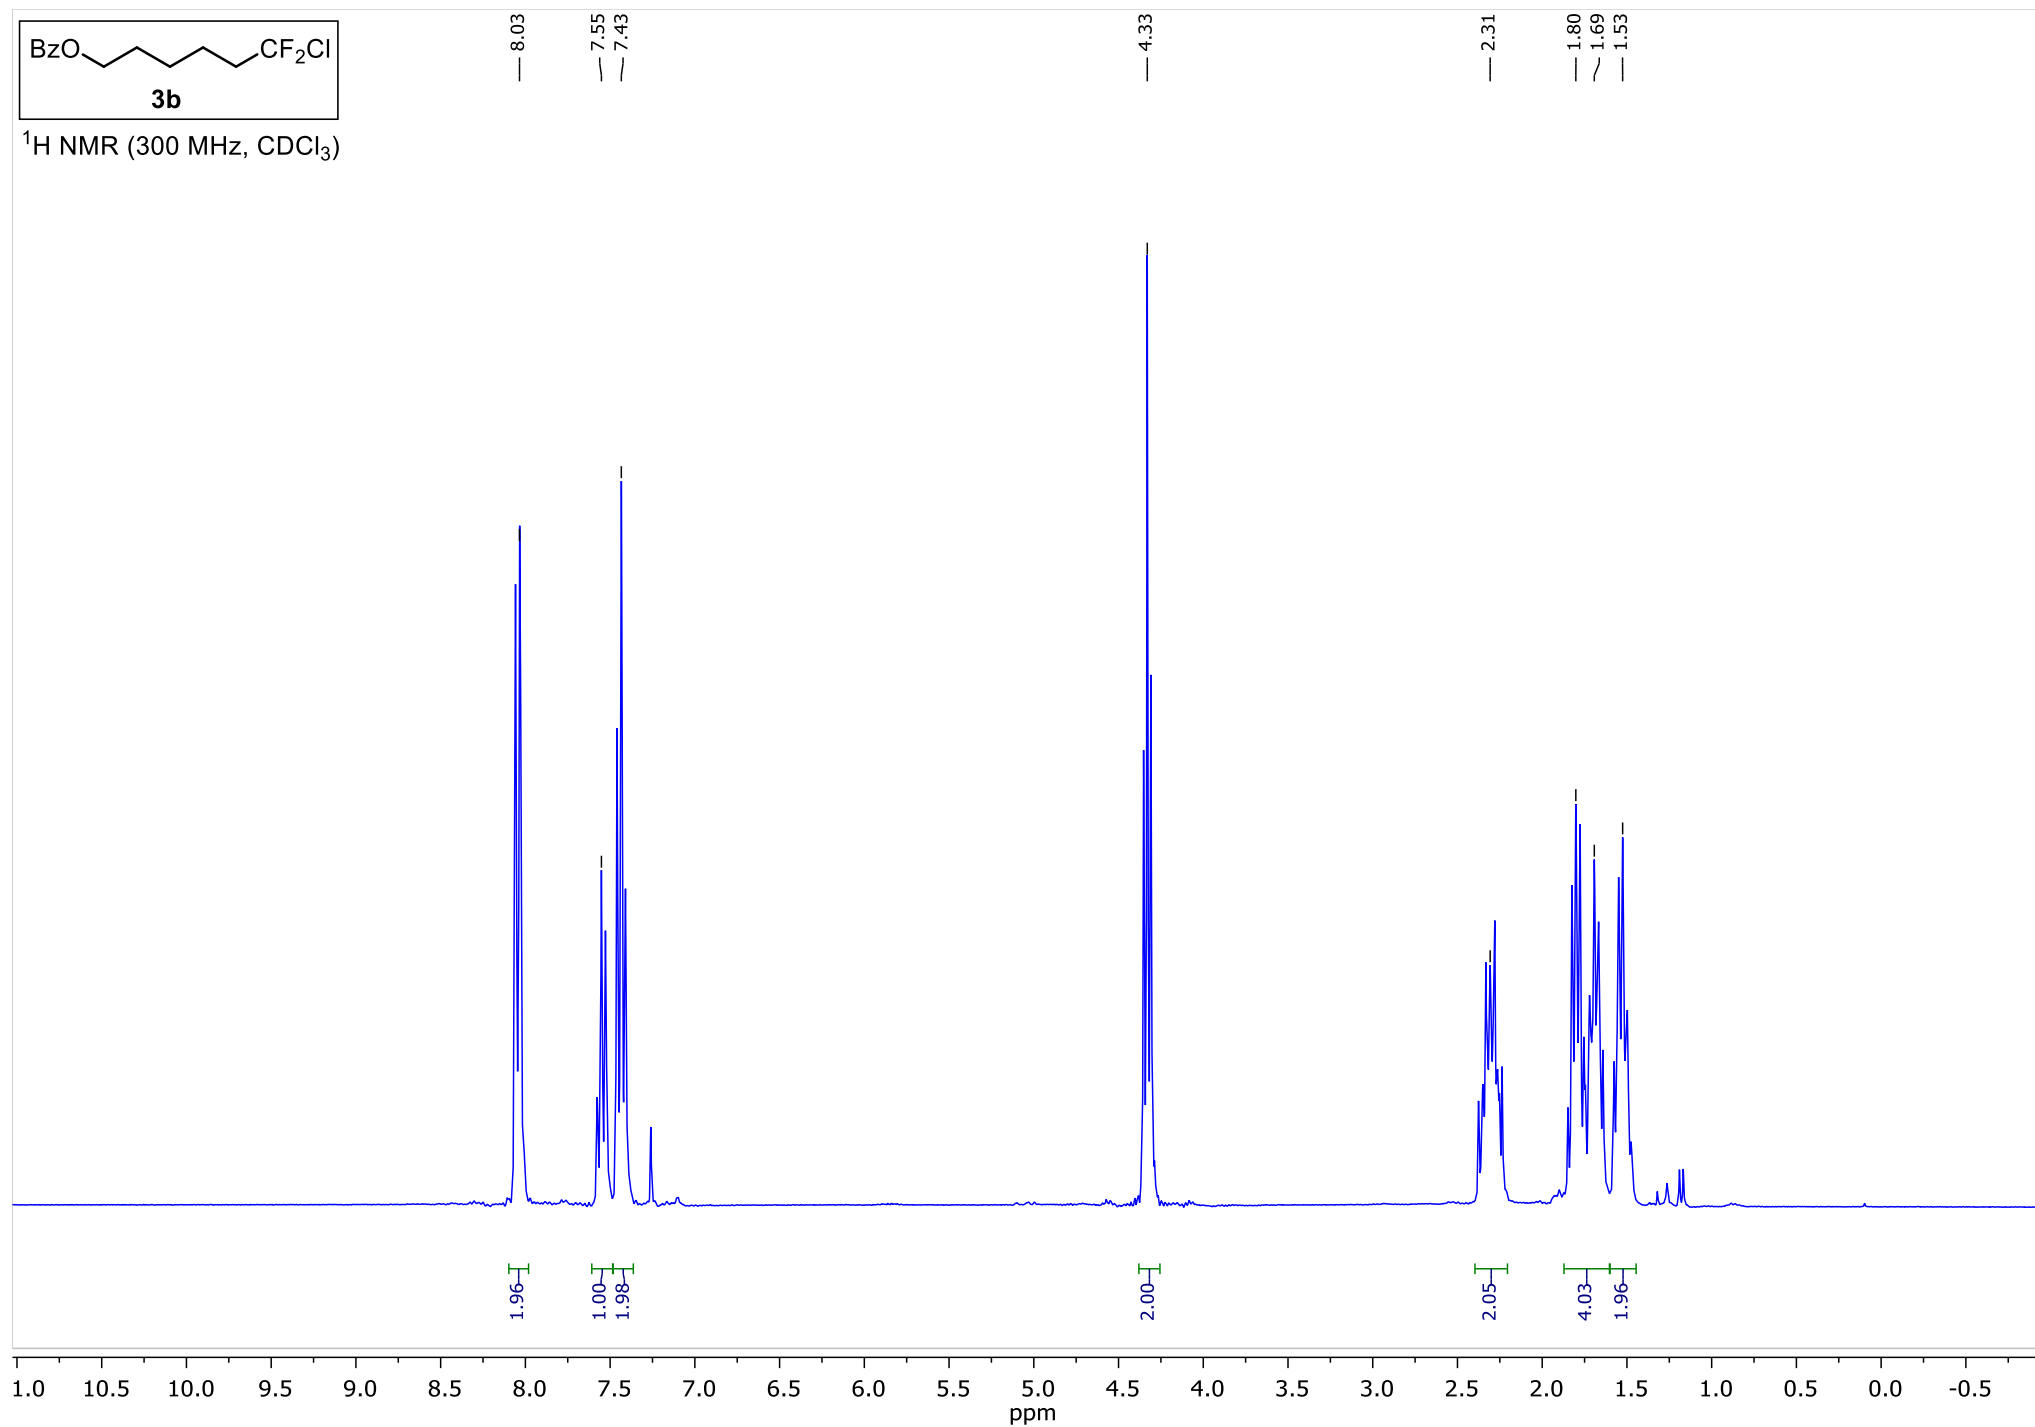

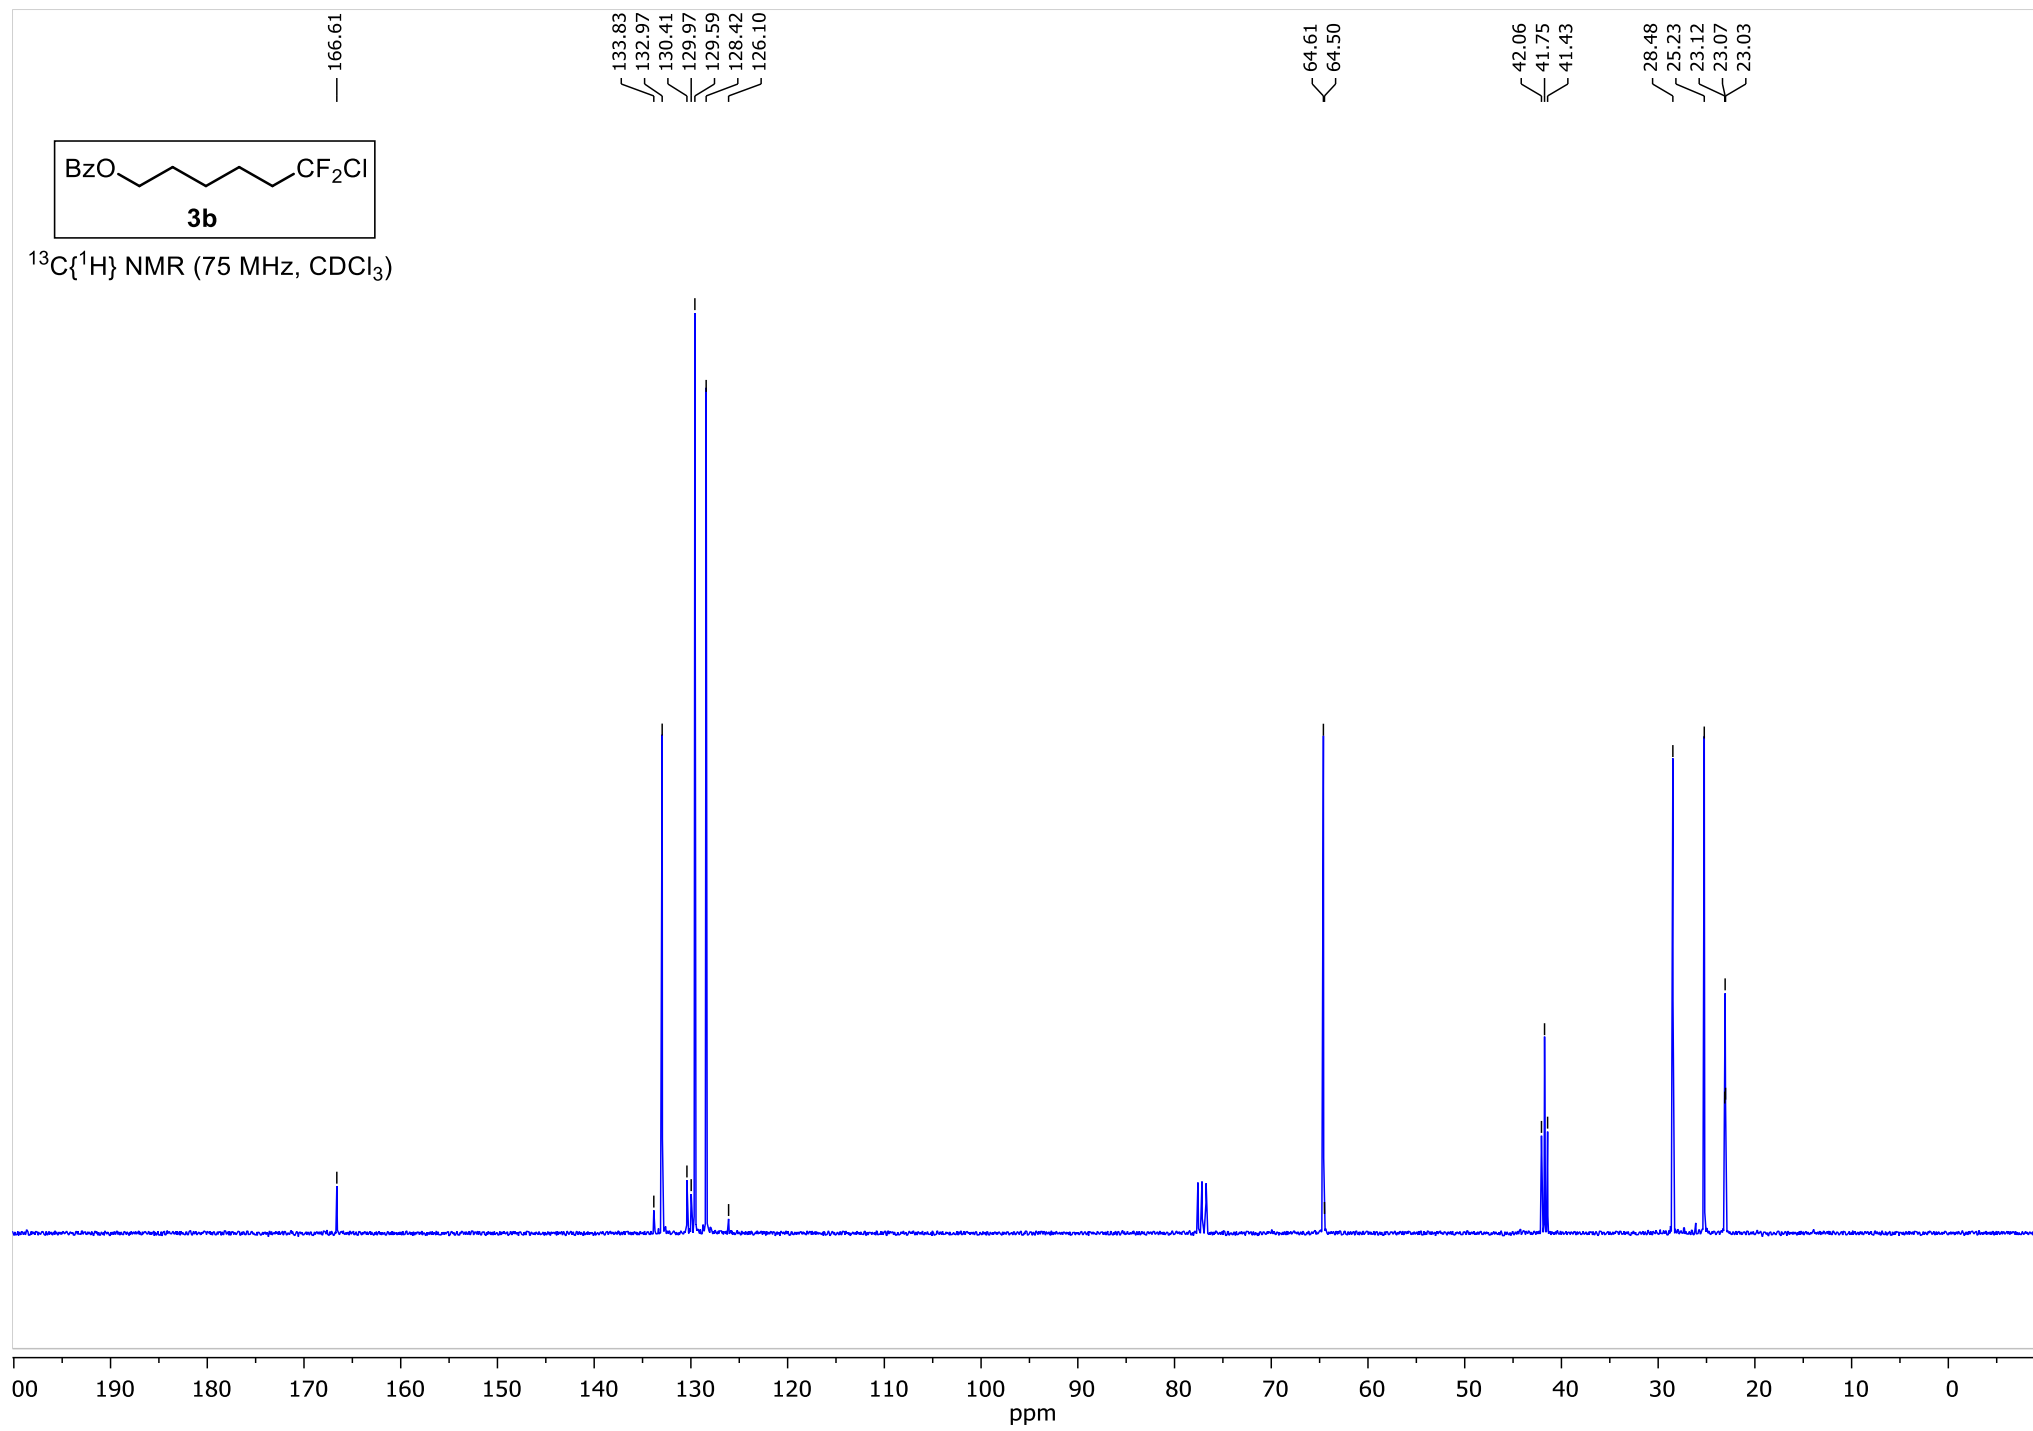

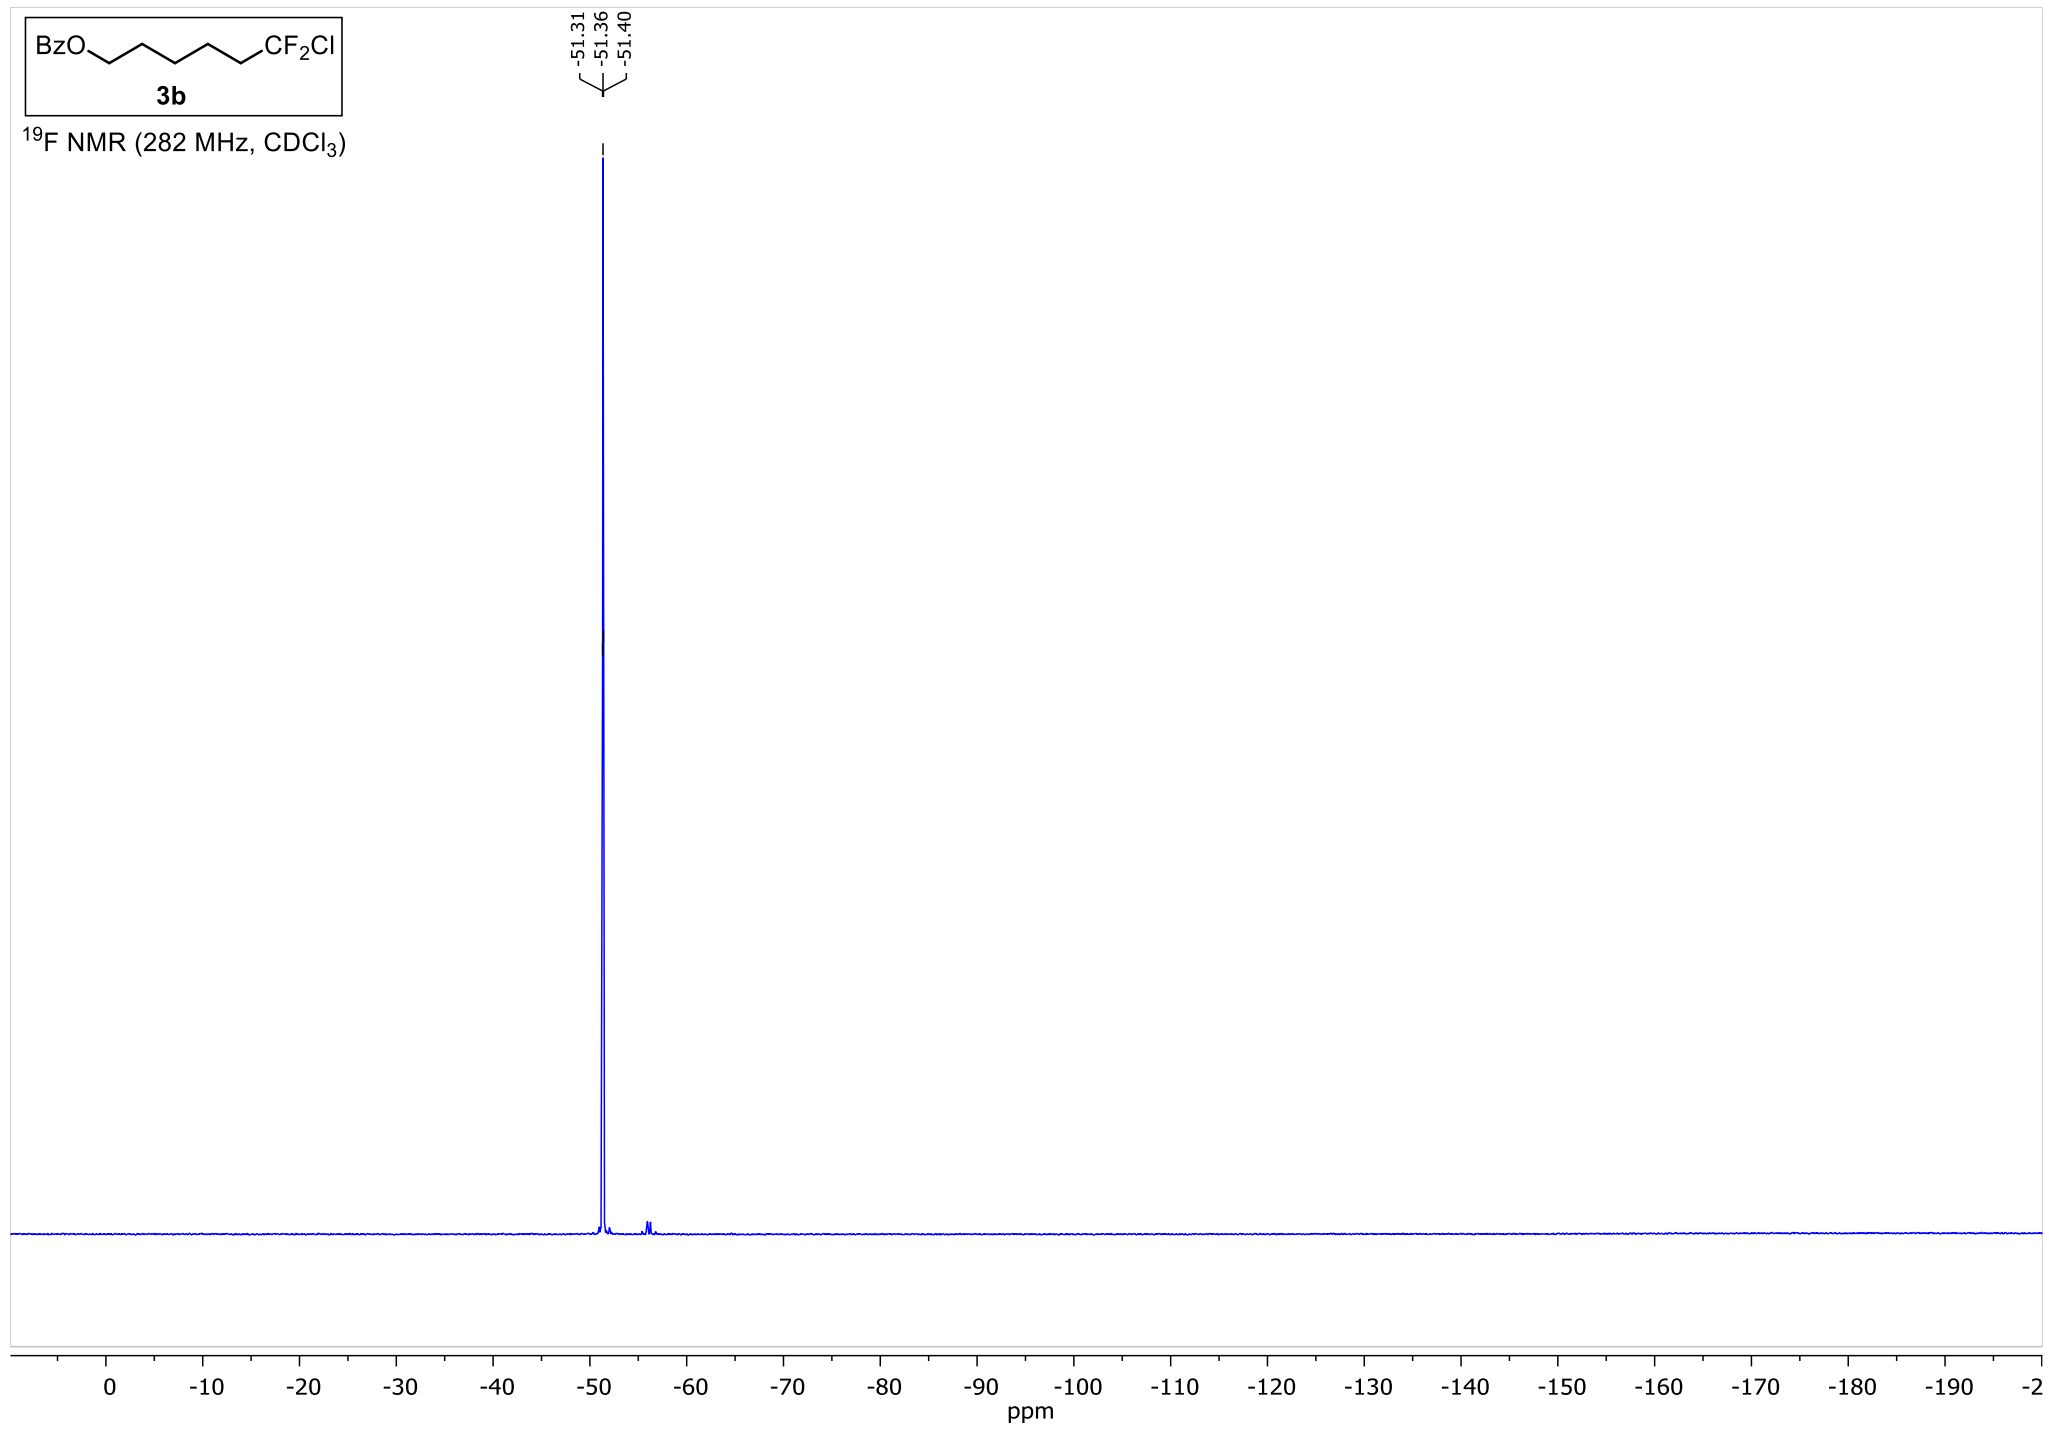

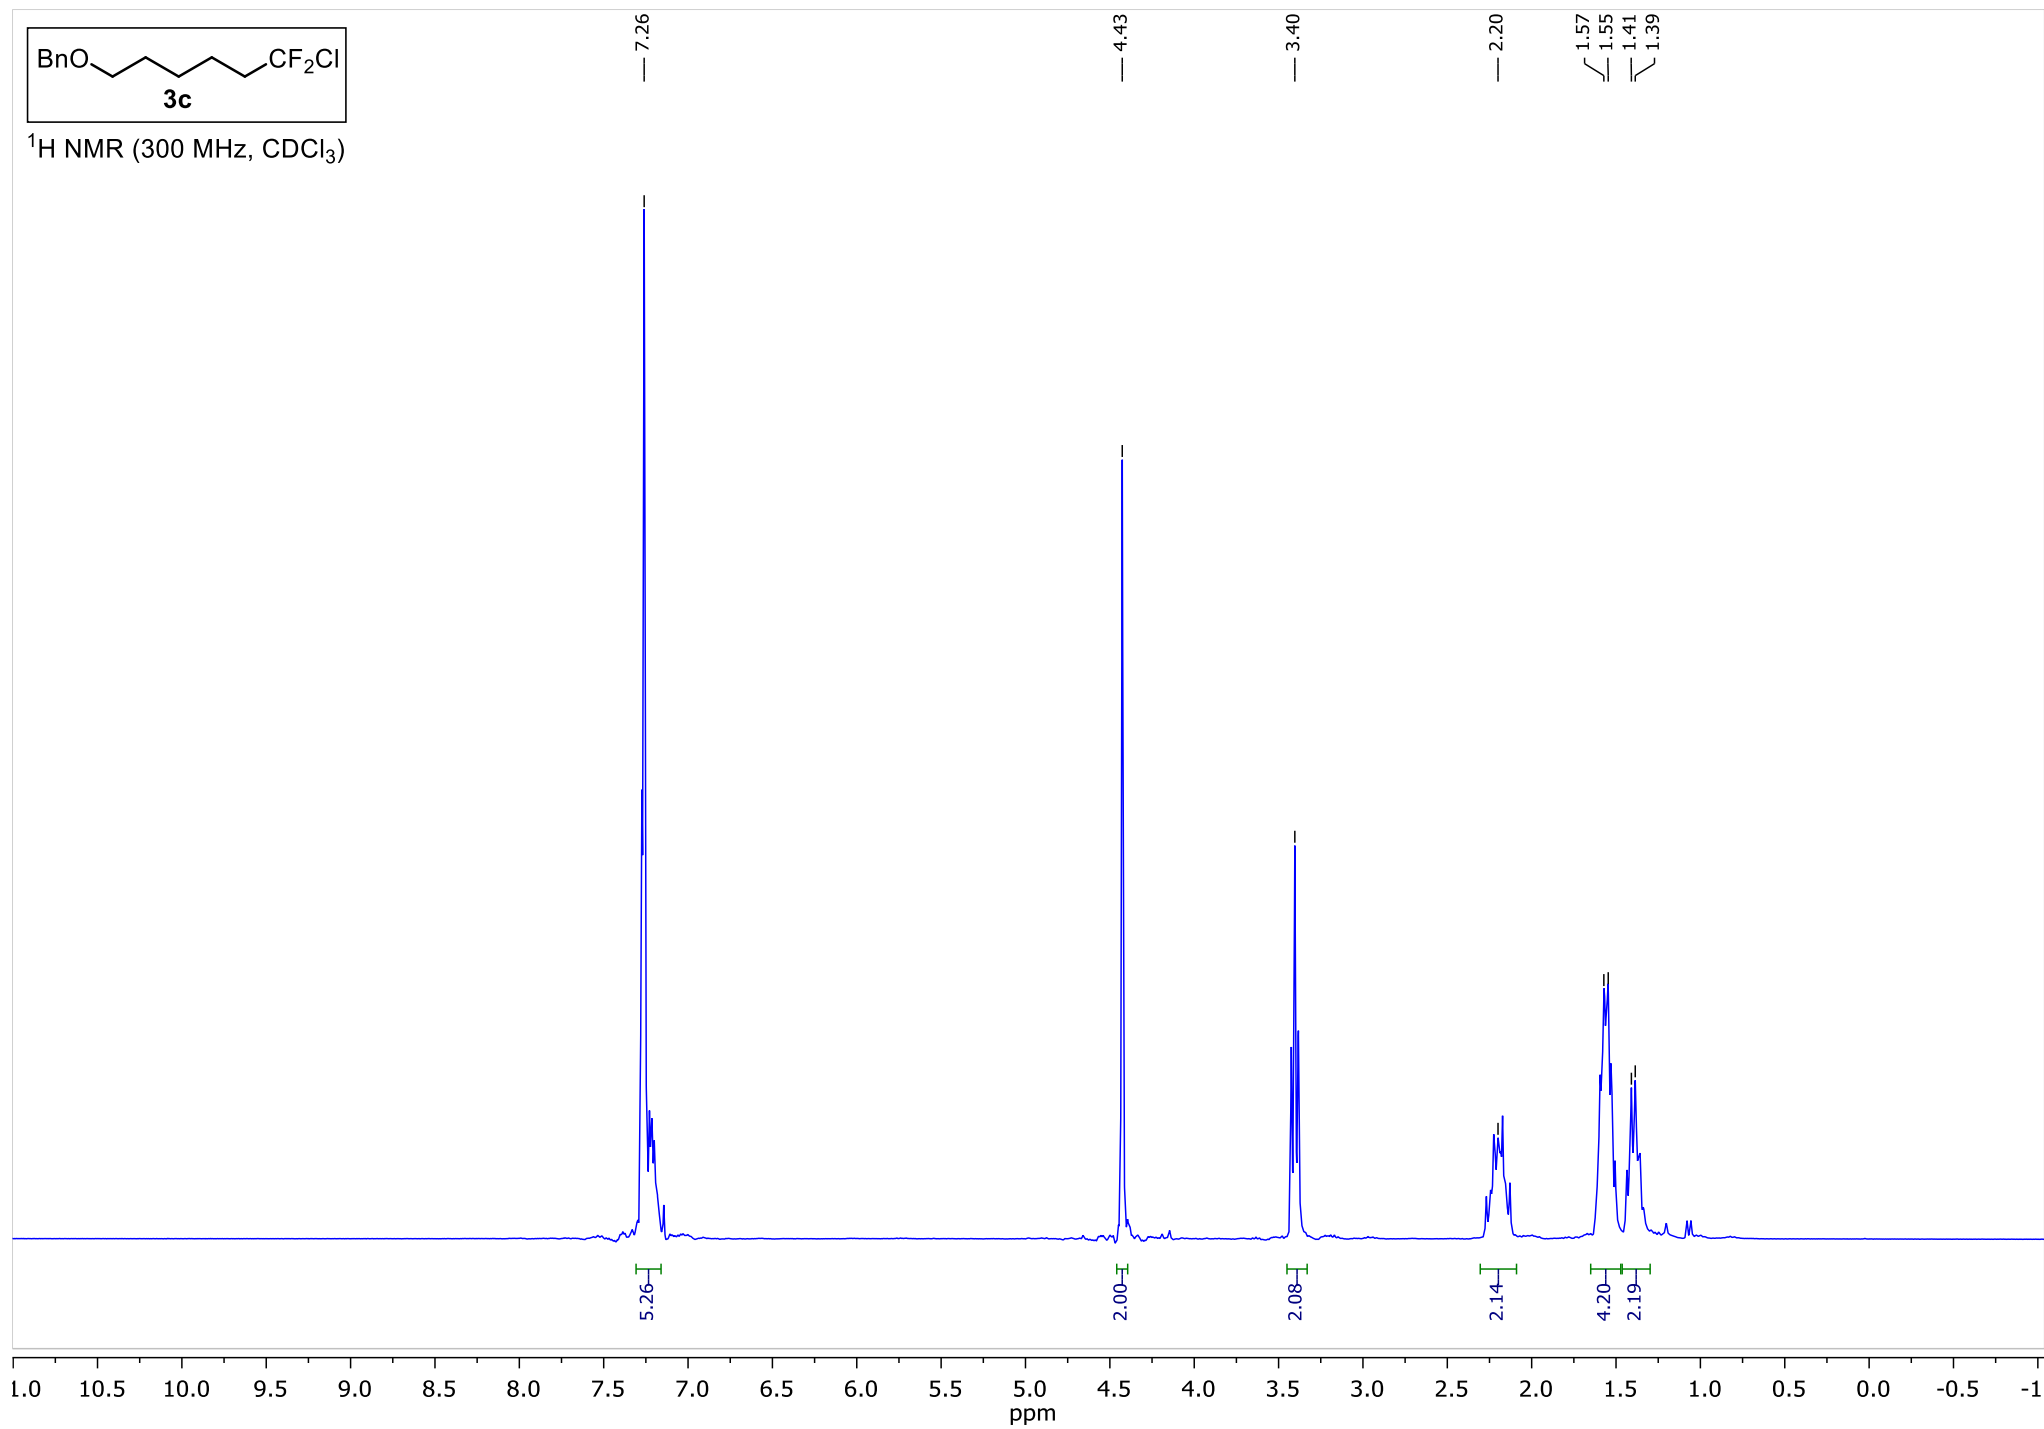



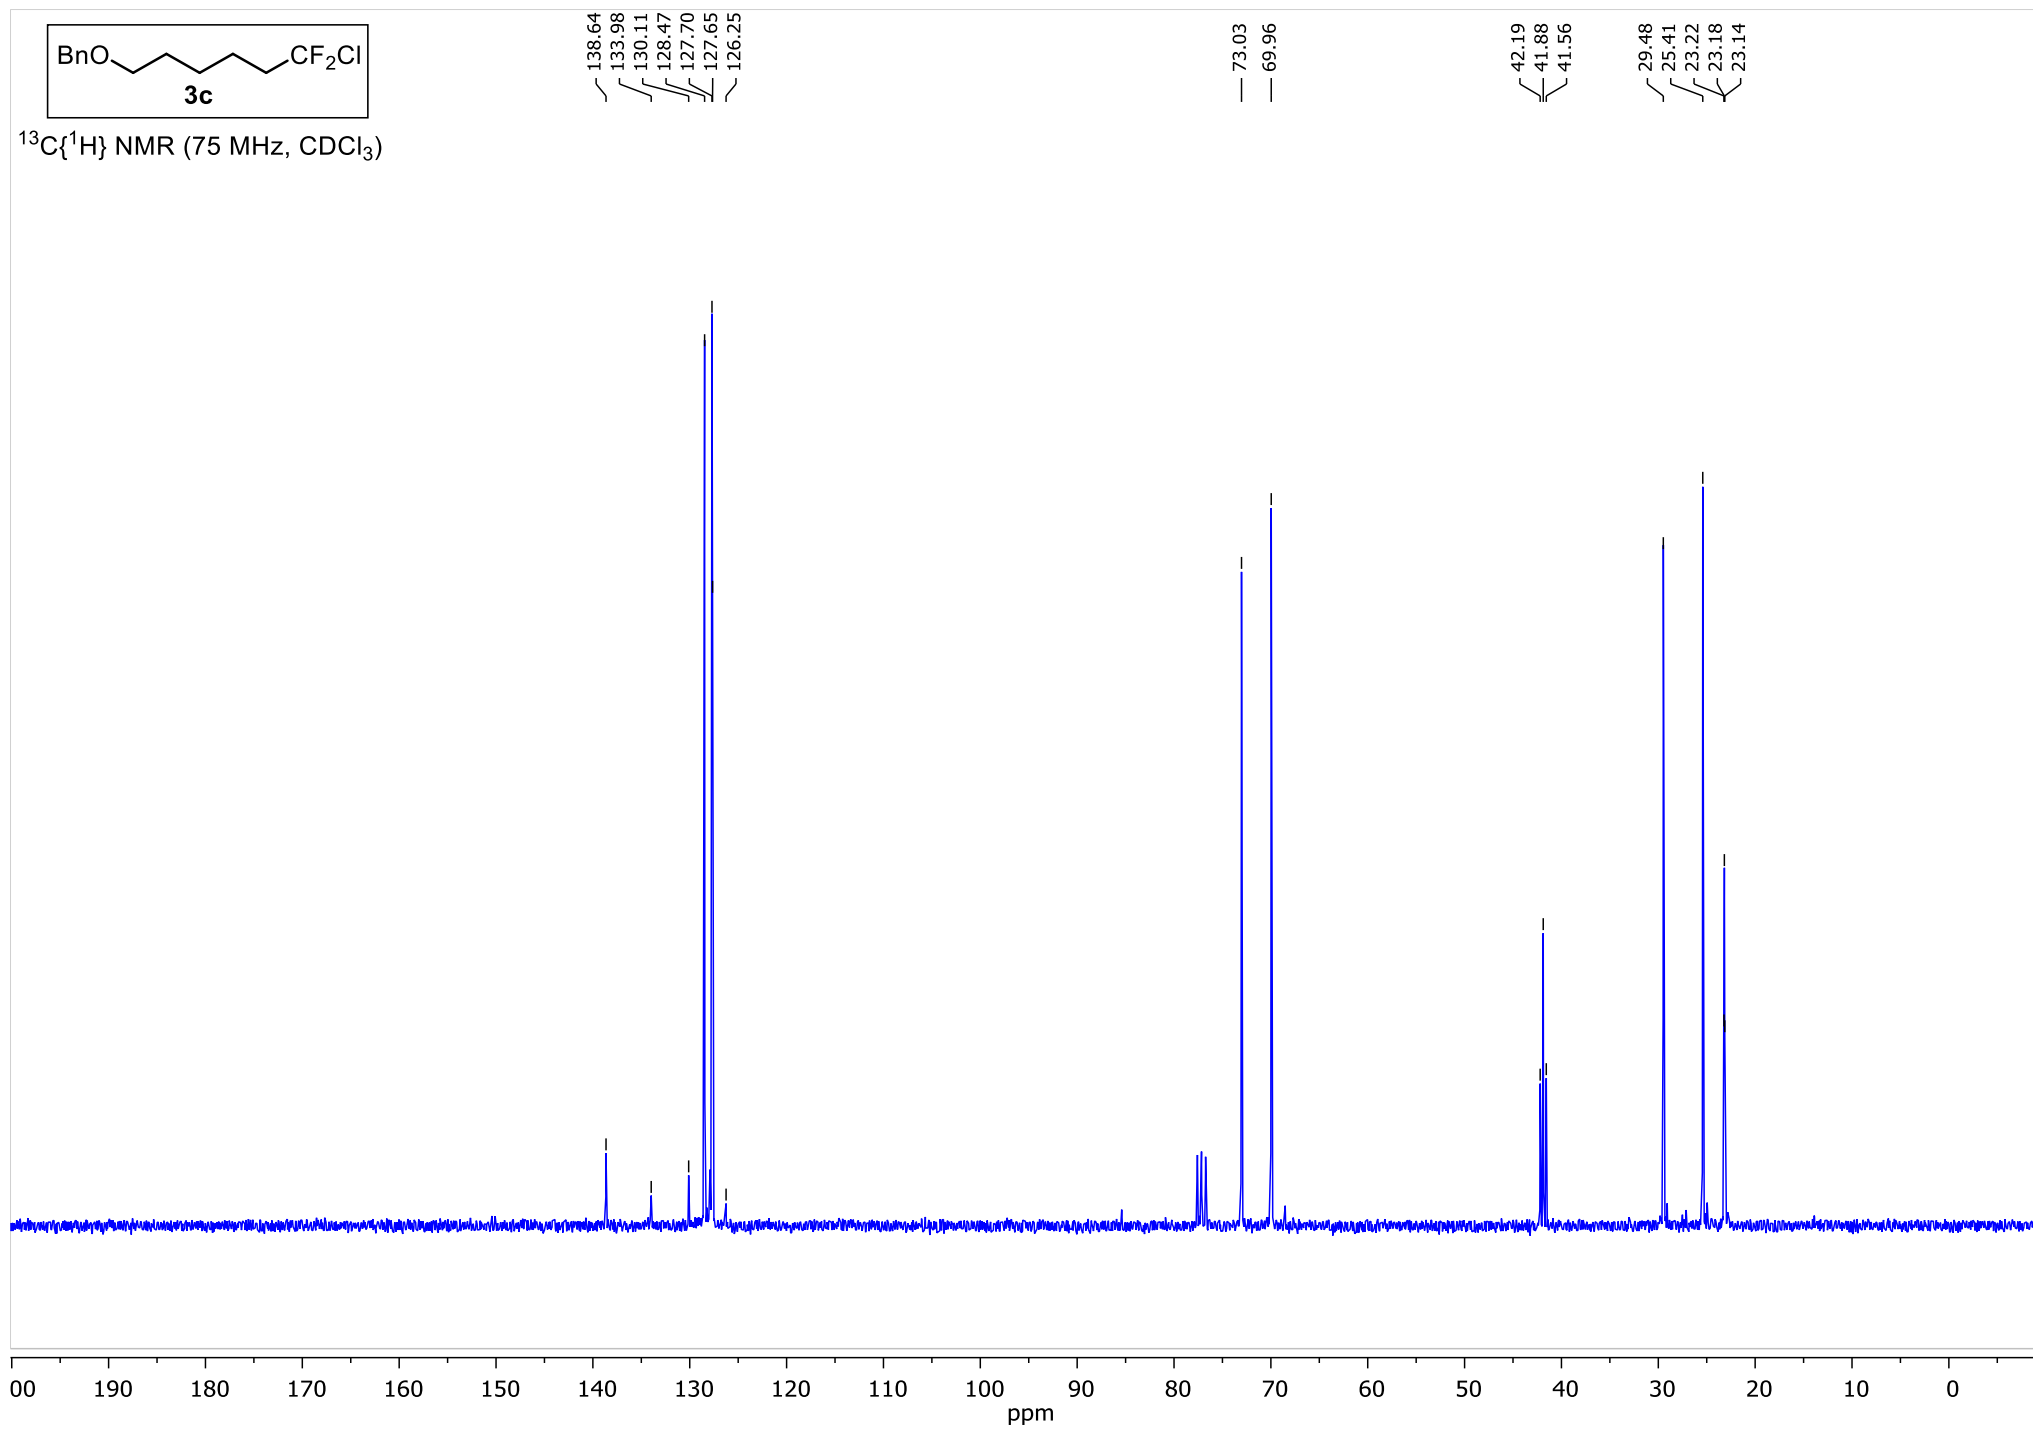

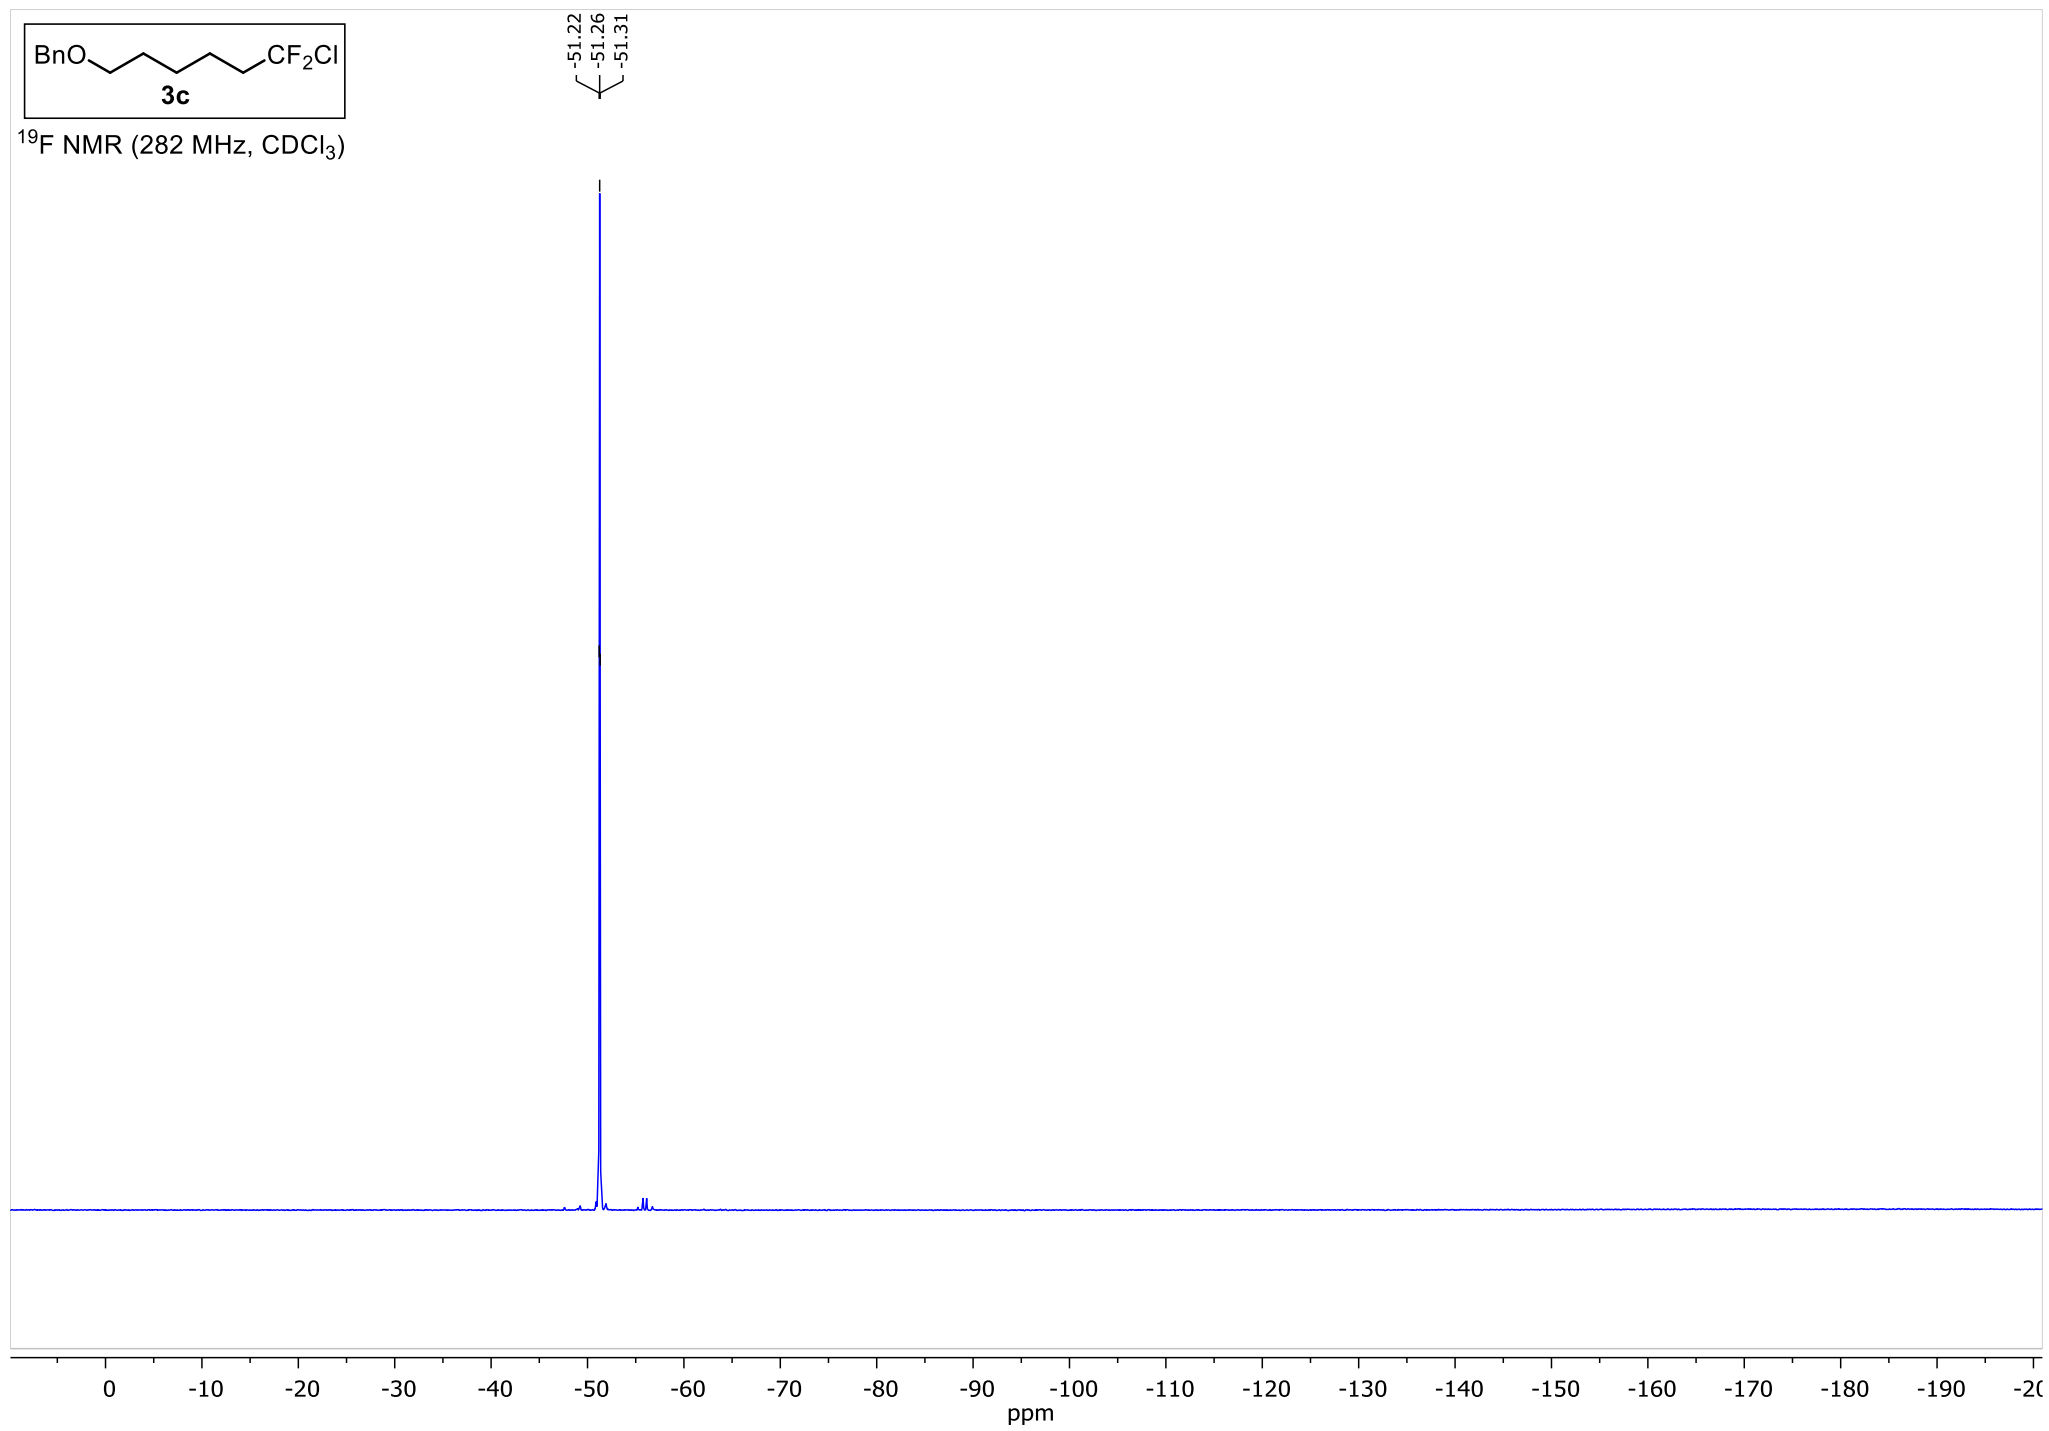

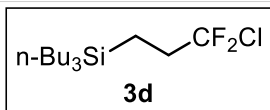

$^1\text{H}$  NMR (300 MHz,  $\text{CDCl}_3$ )

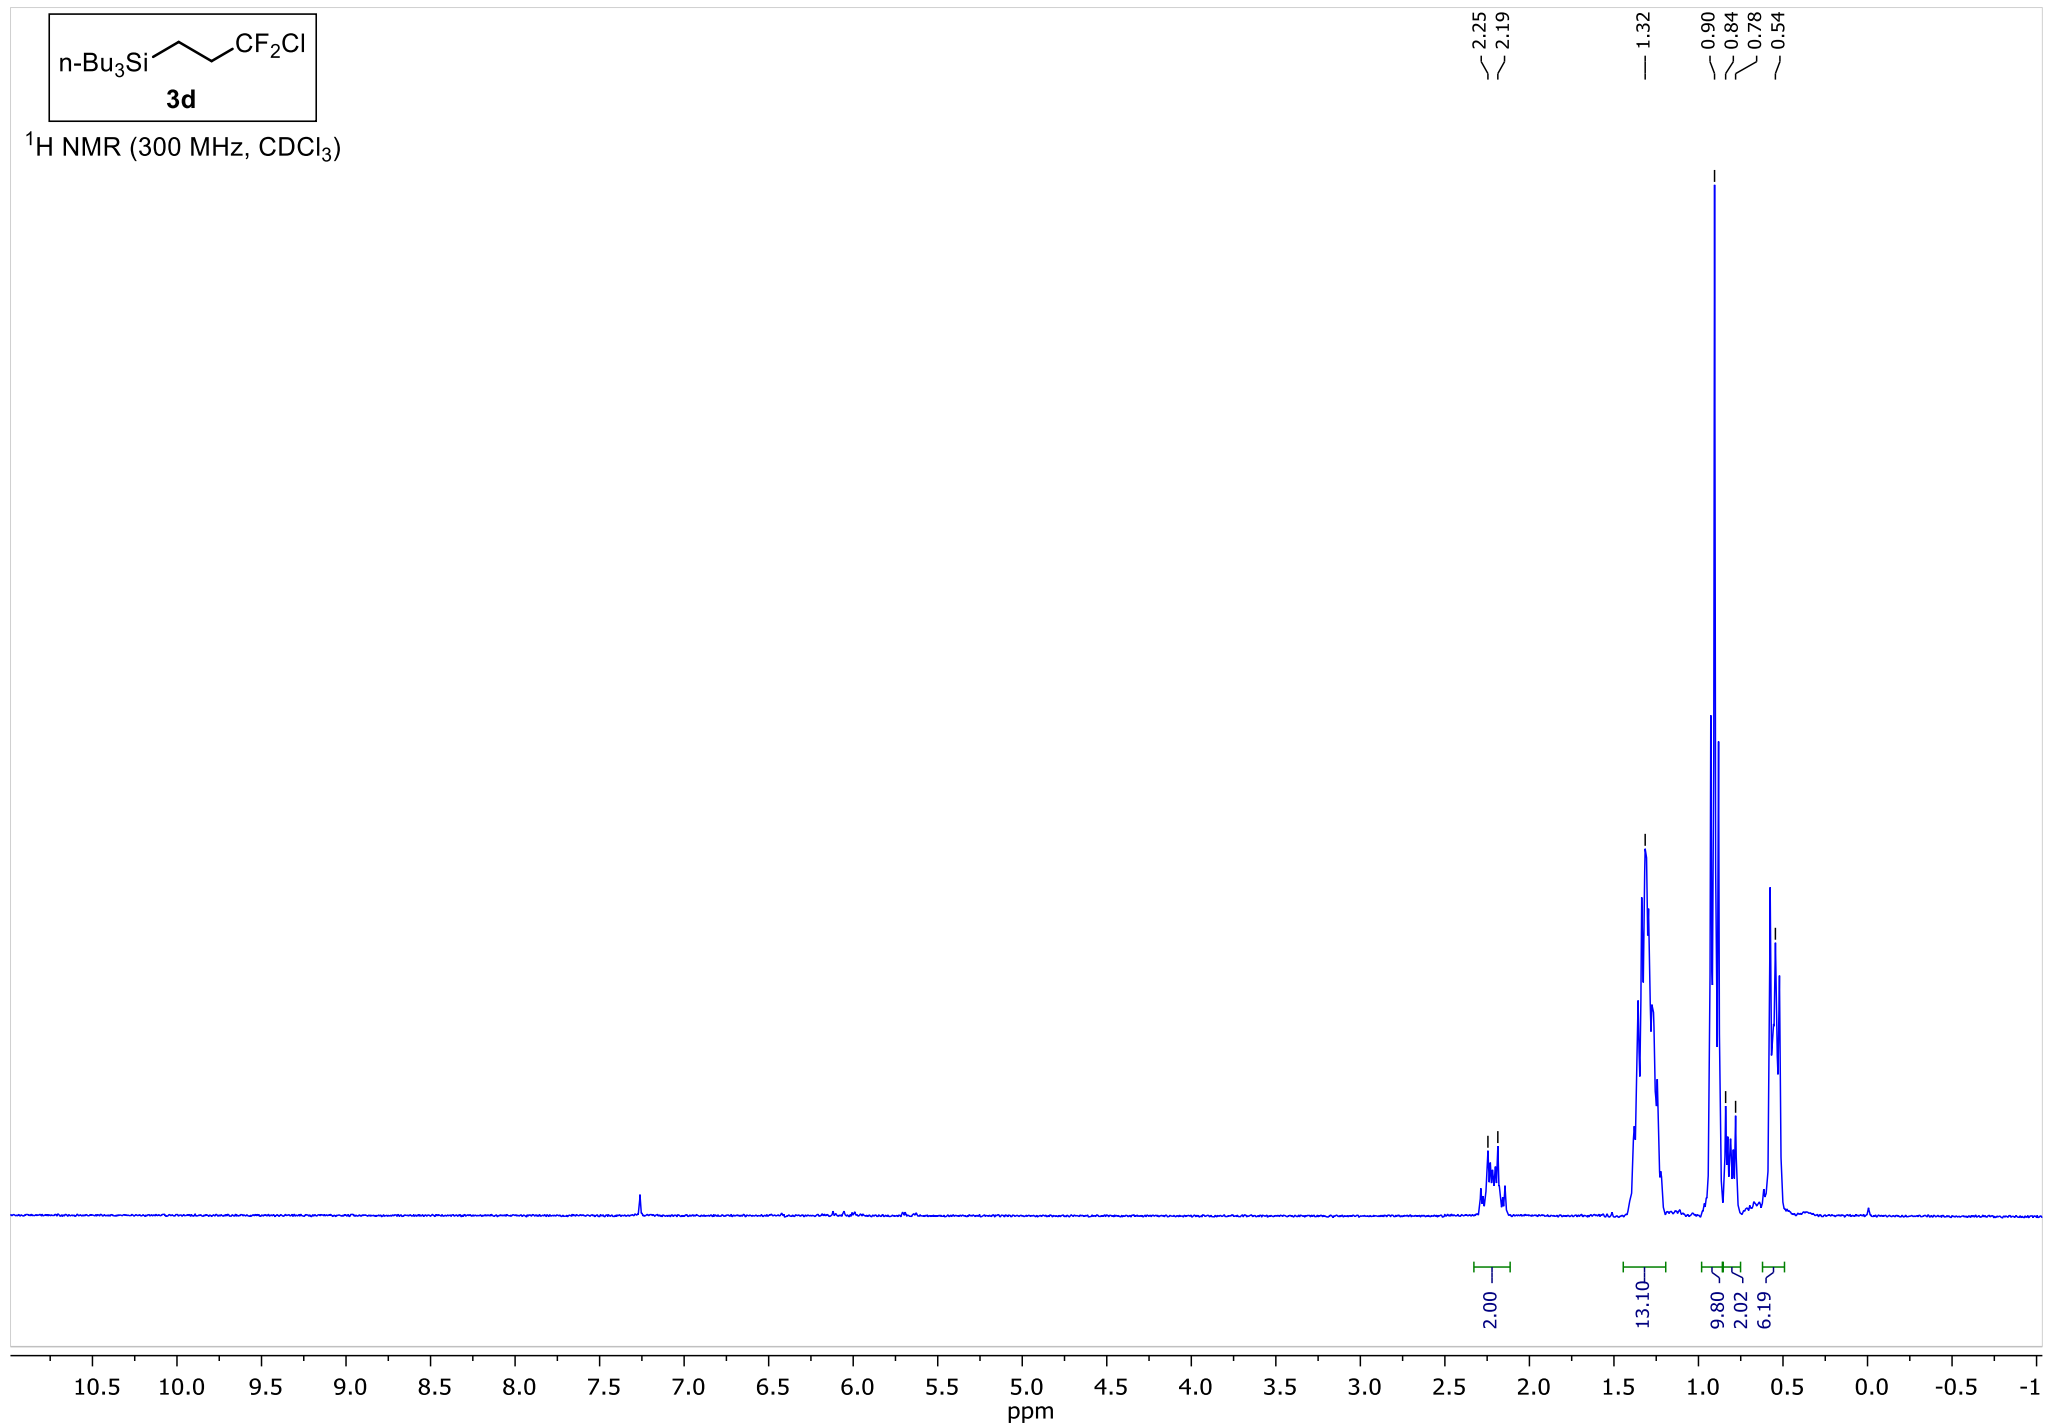

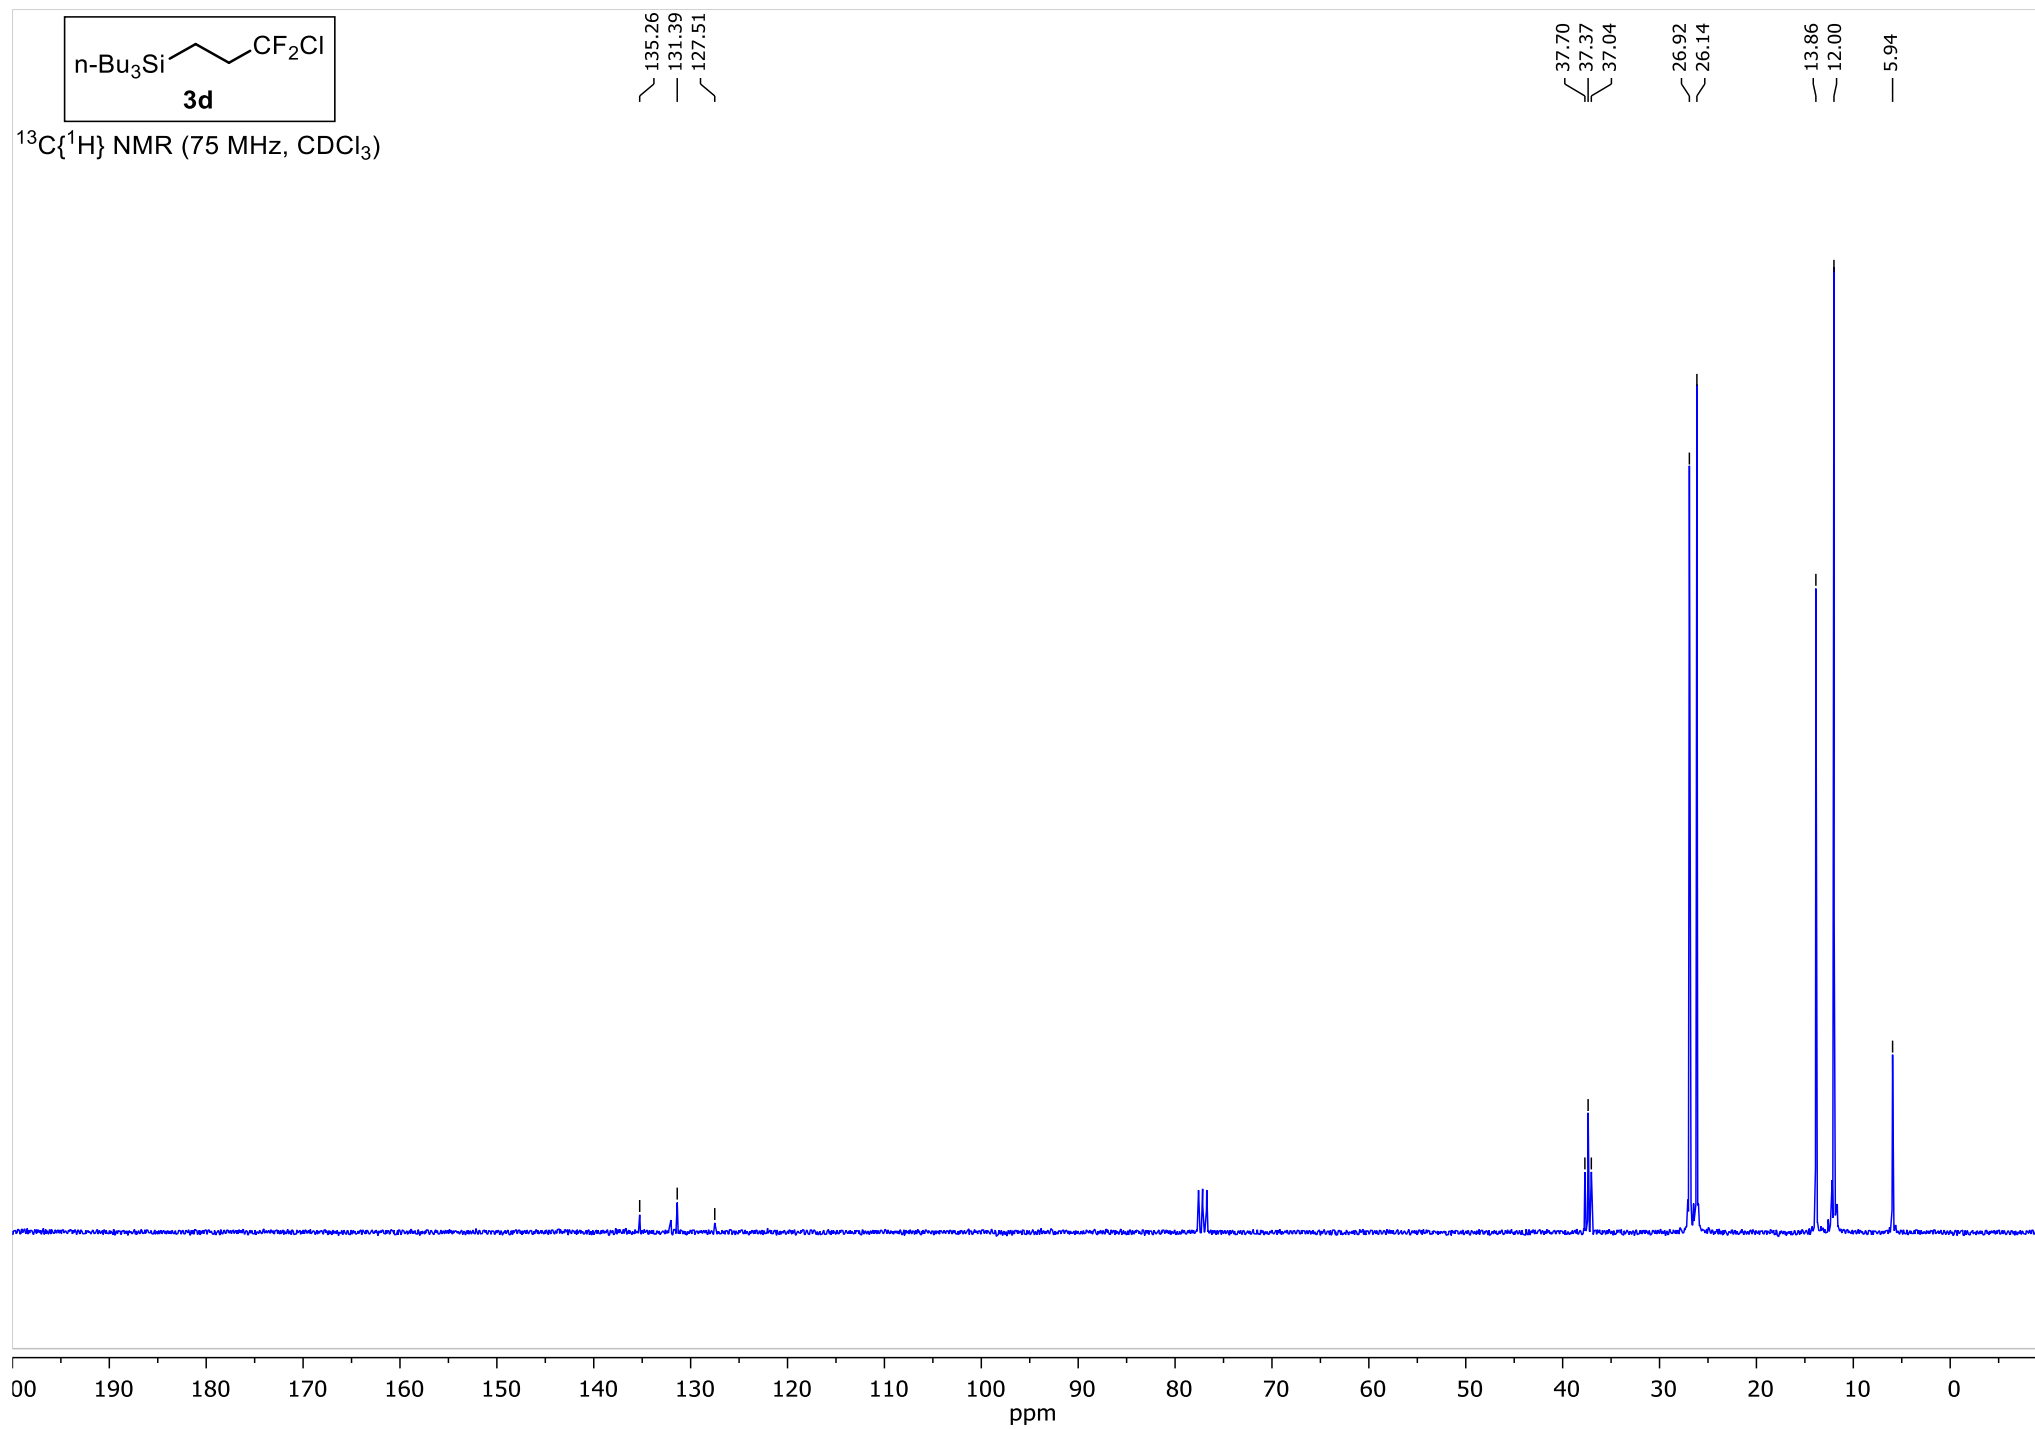

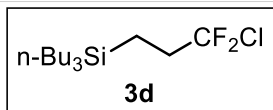

$^{19}\text{F}$  NMR (282 MHz,  $\text{CDCl}_3$ )

-53.72  
-53.77  
-53.81

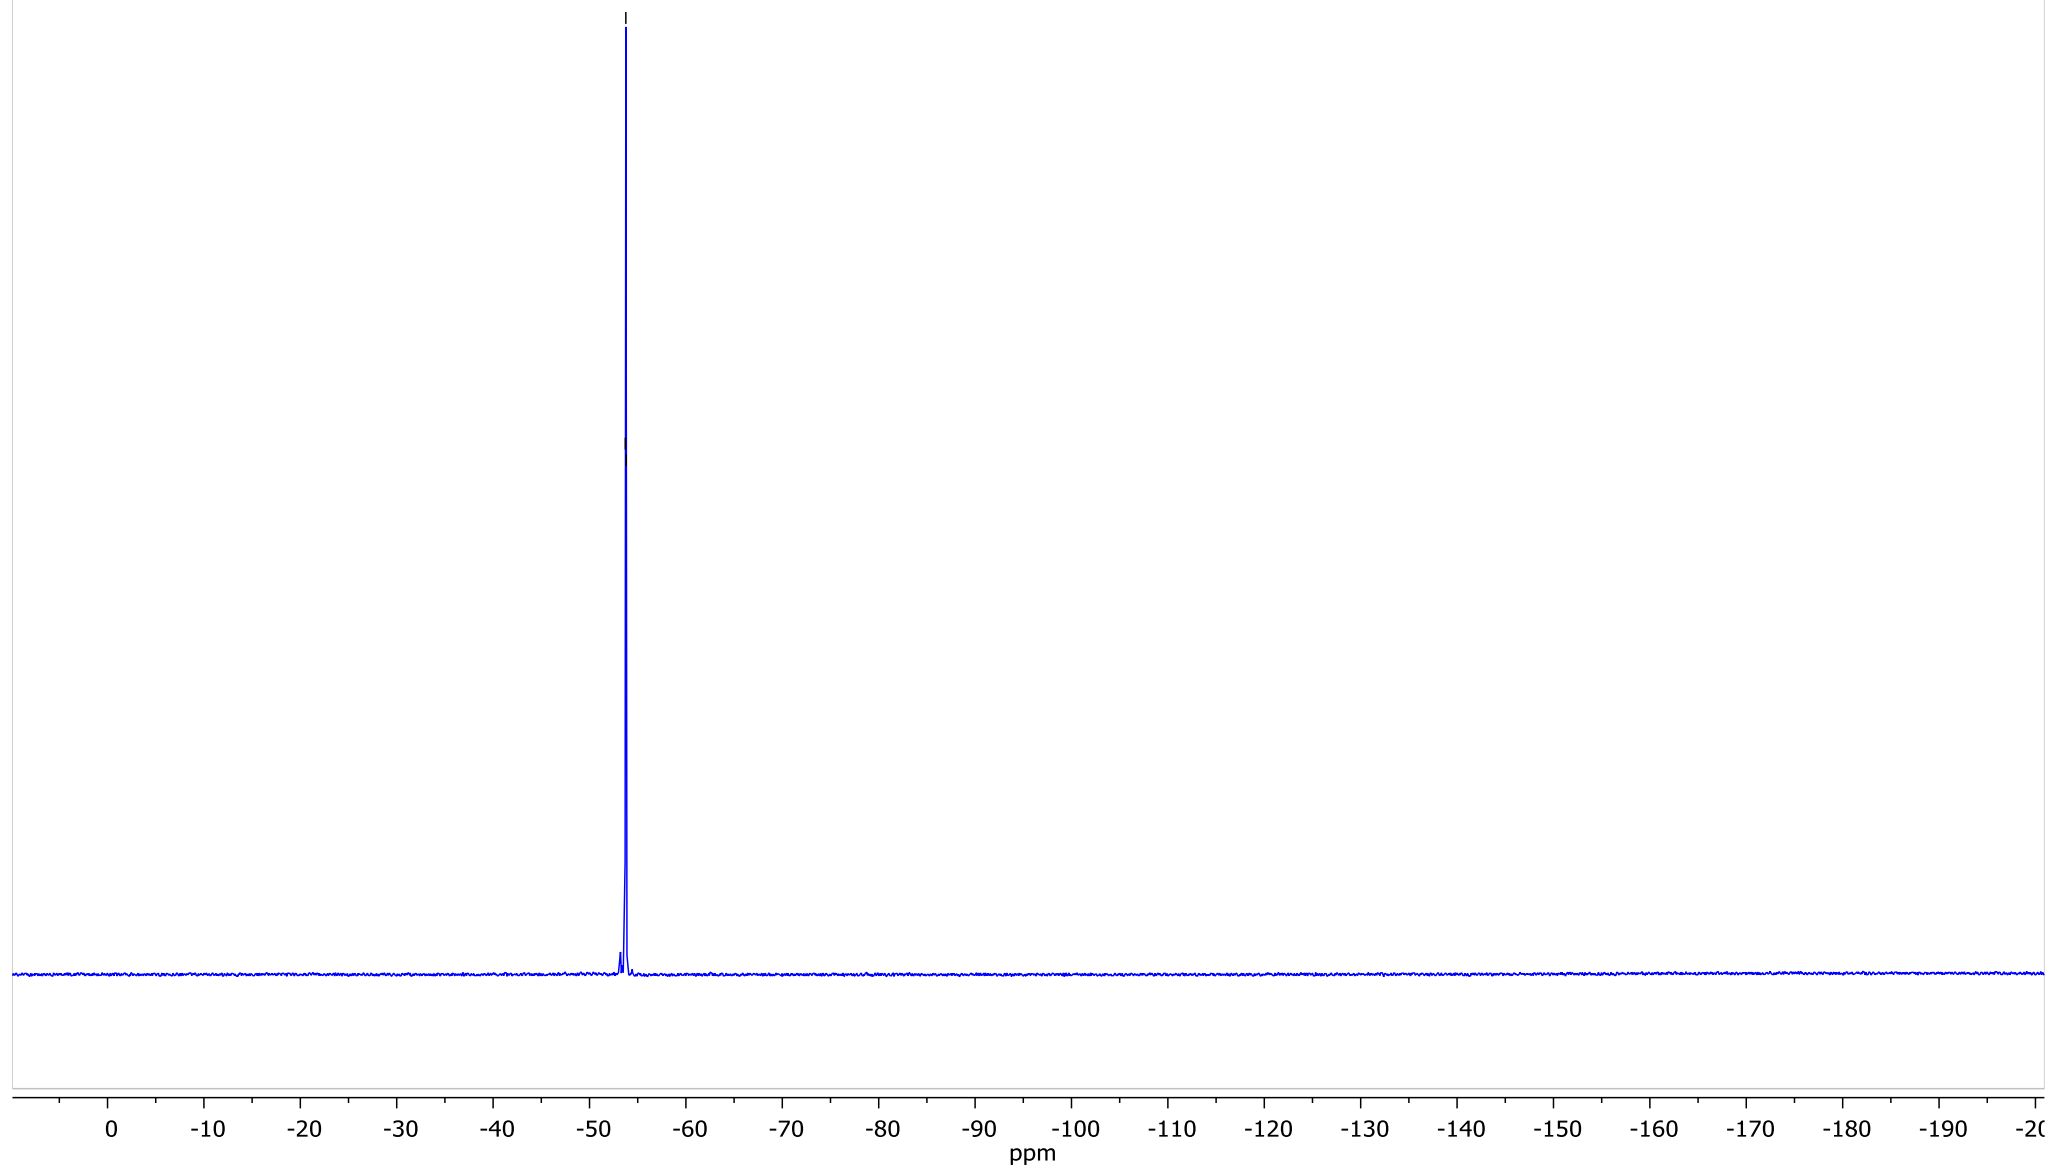

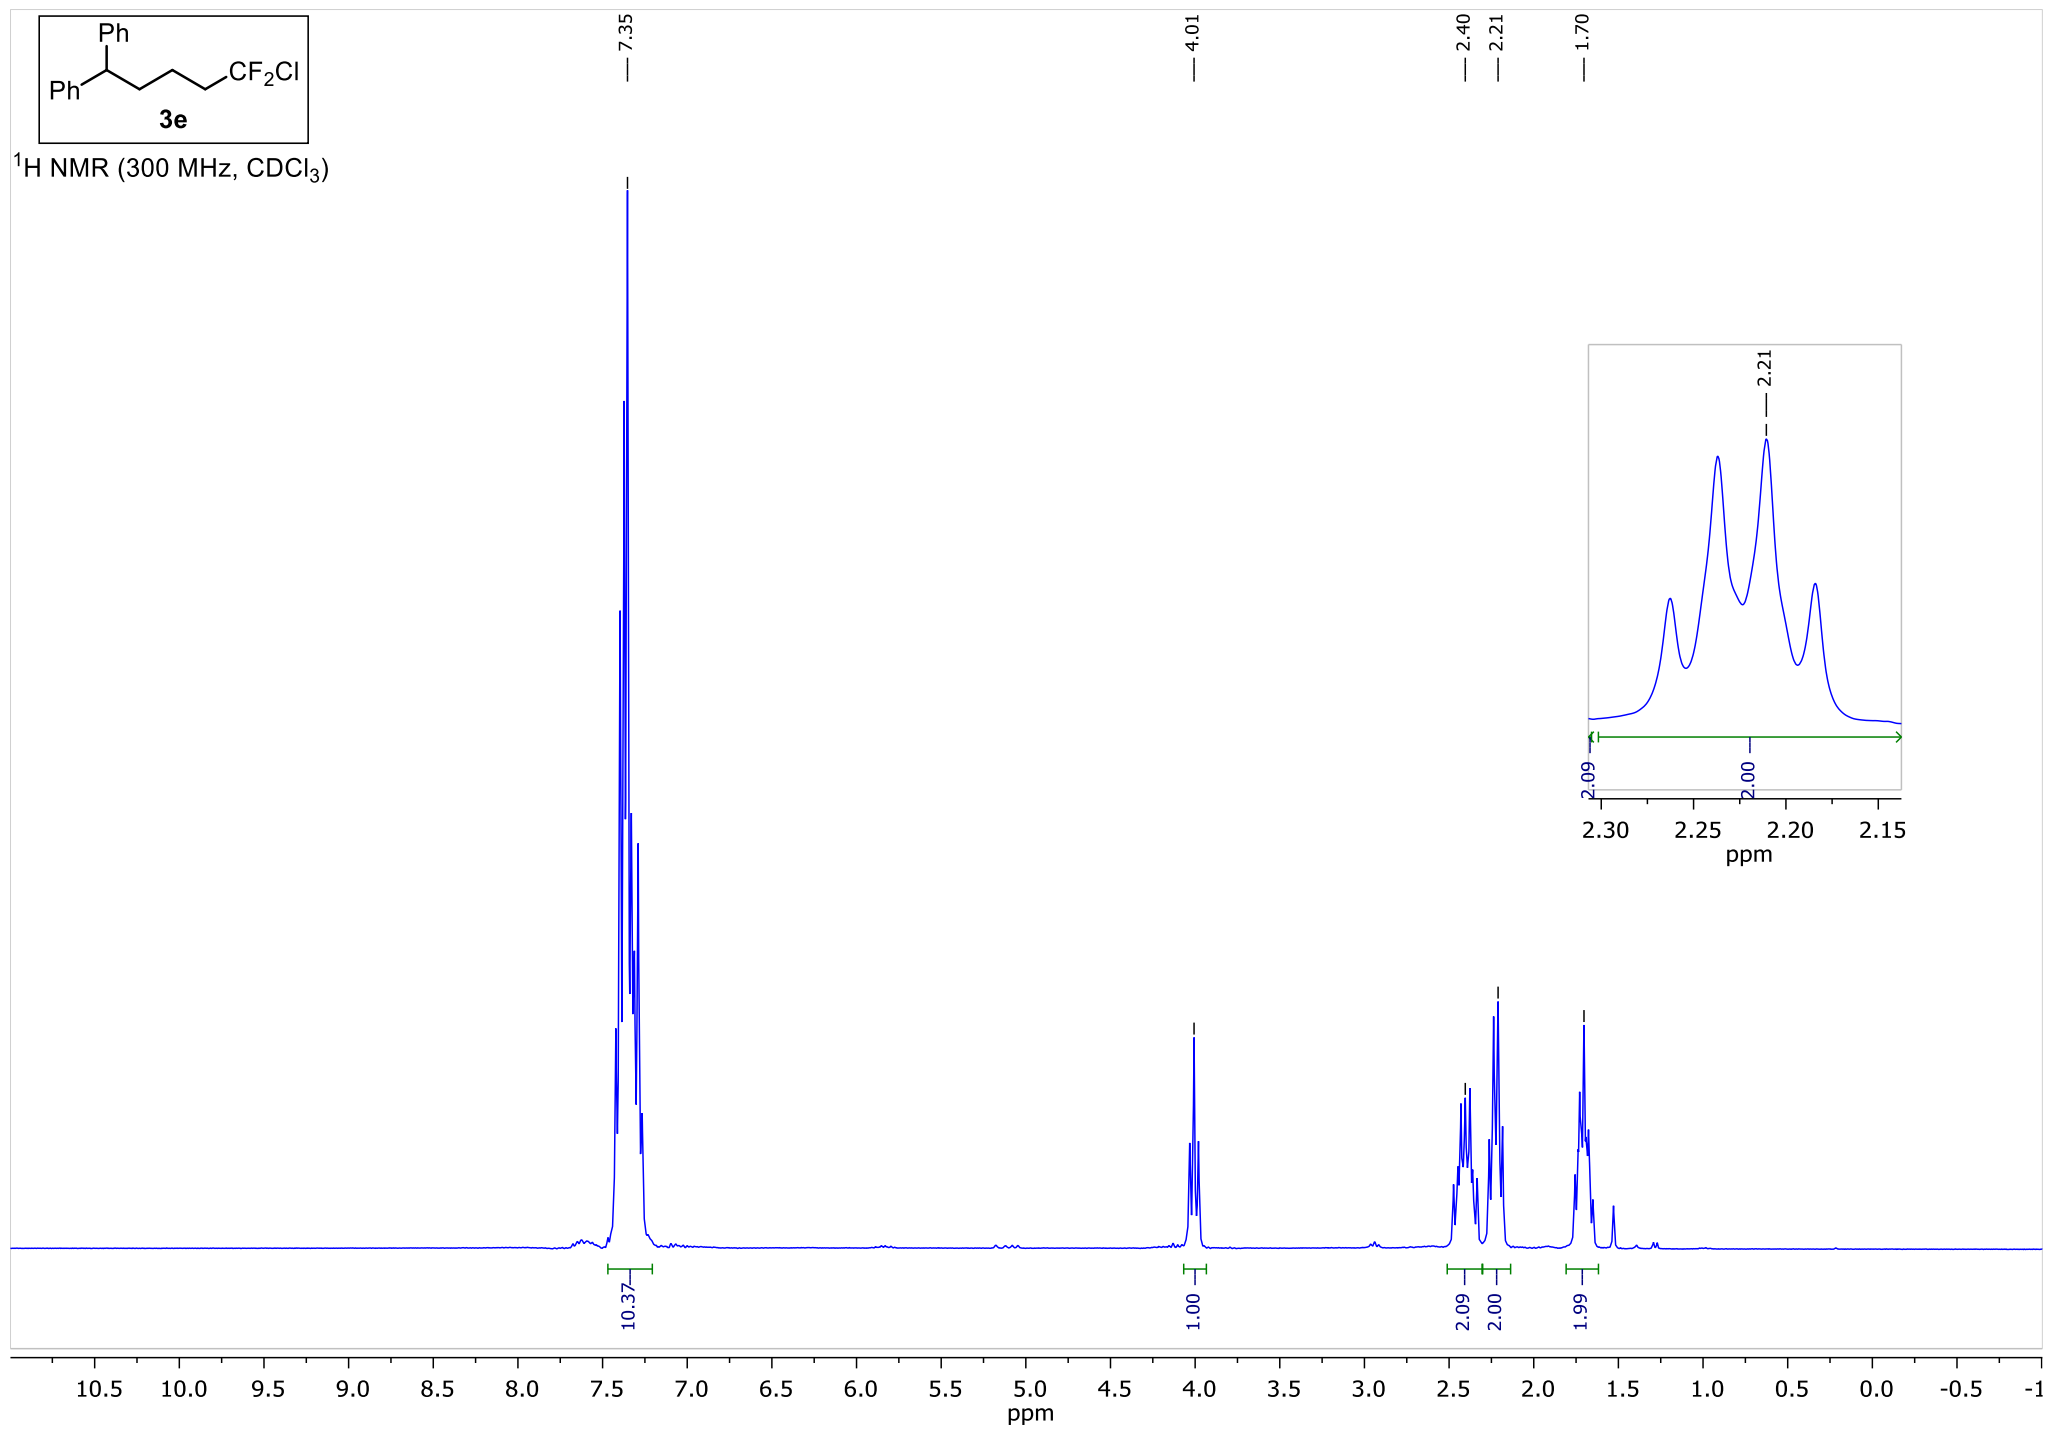

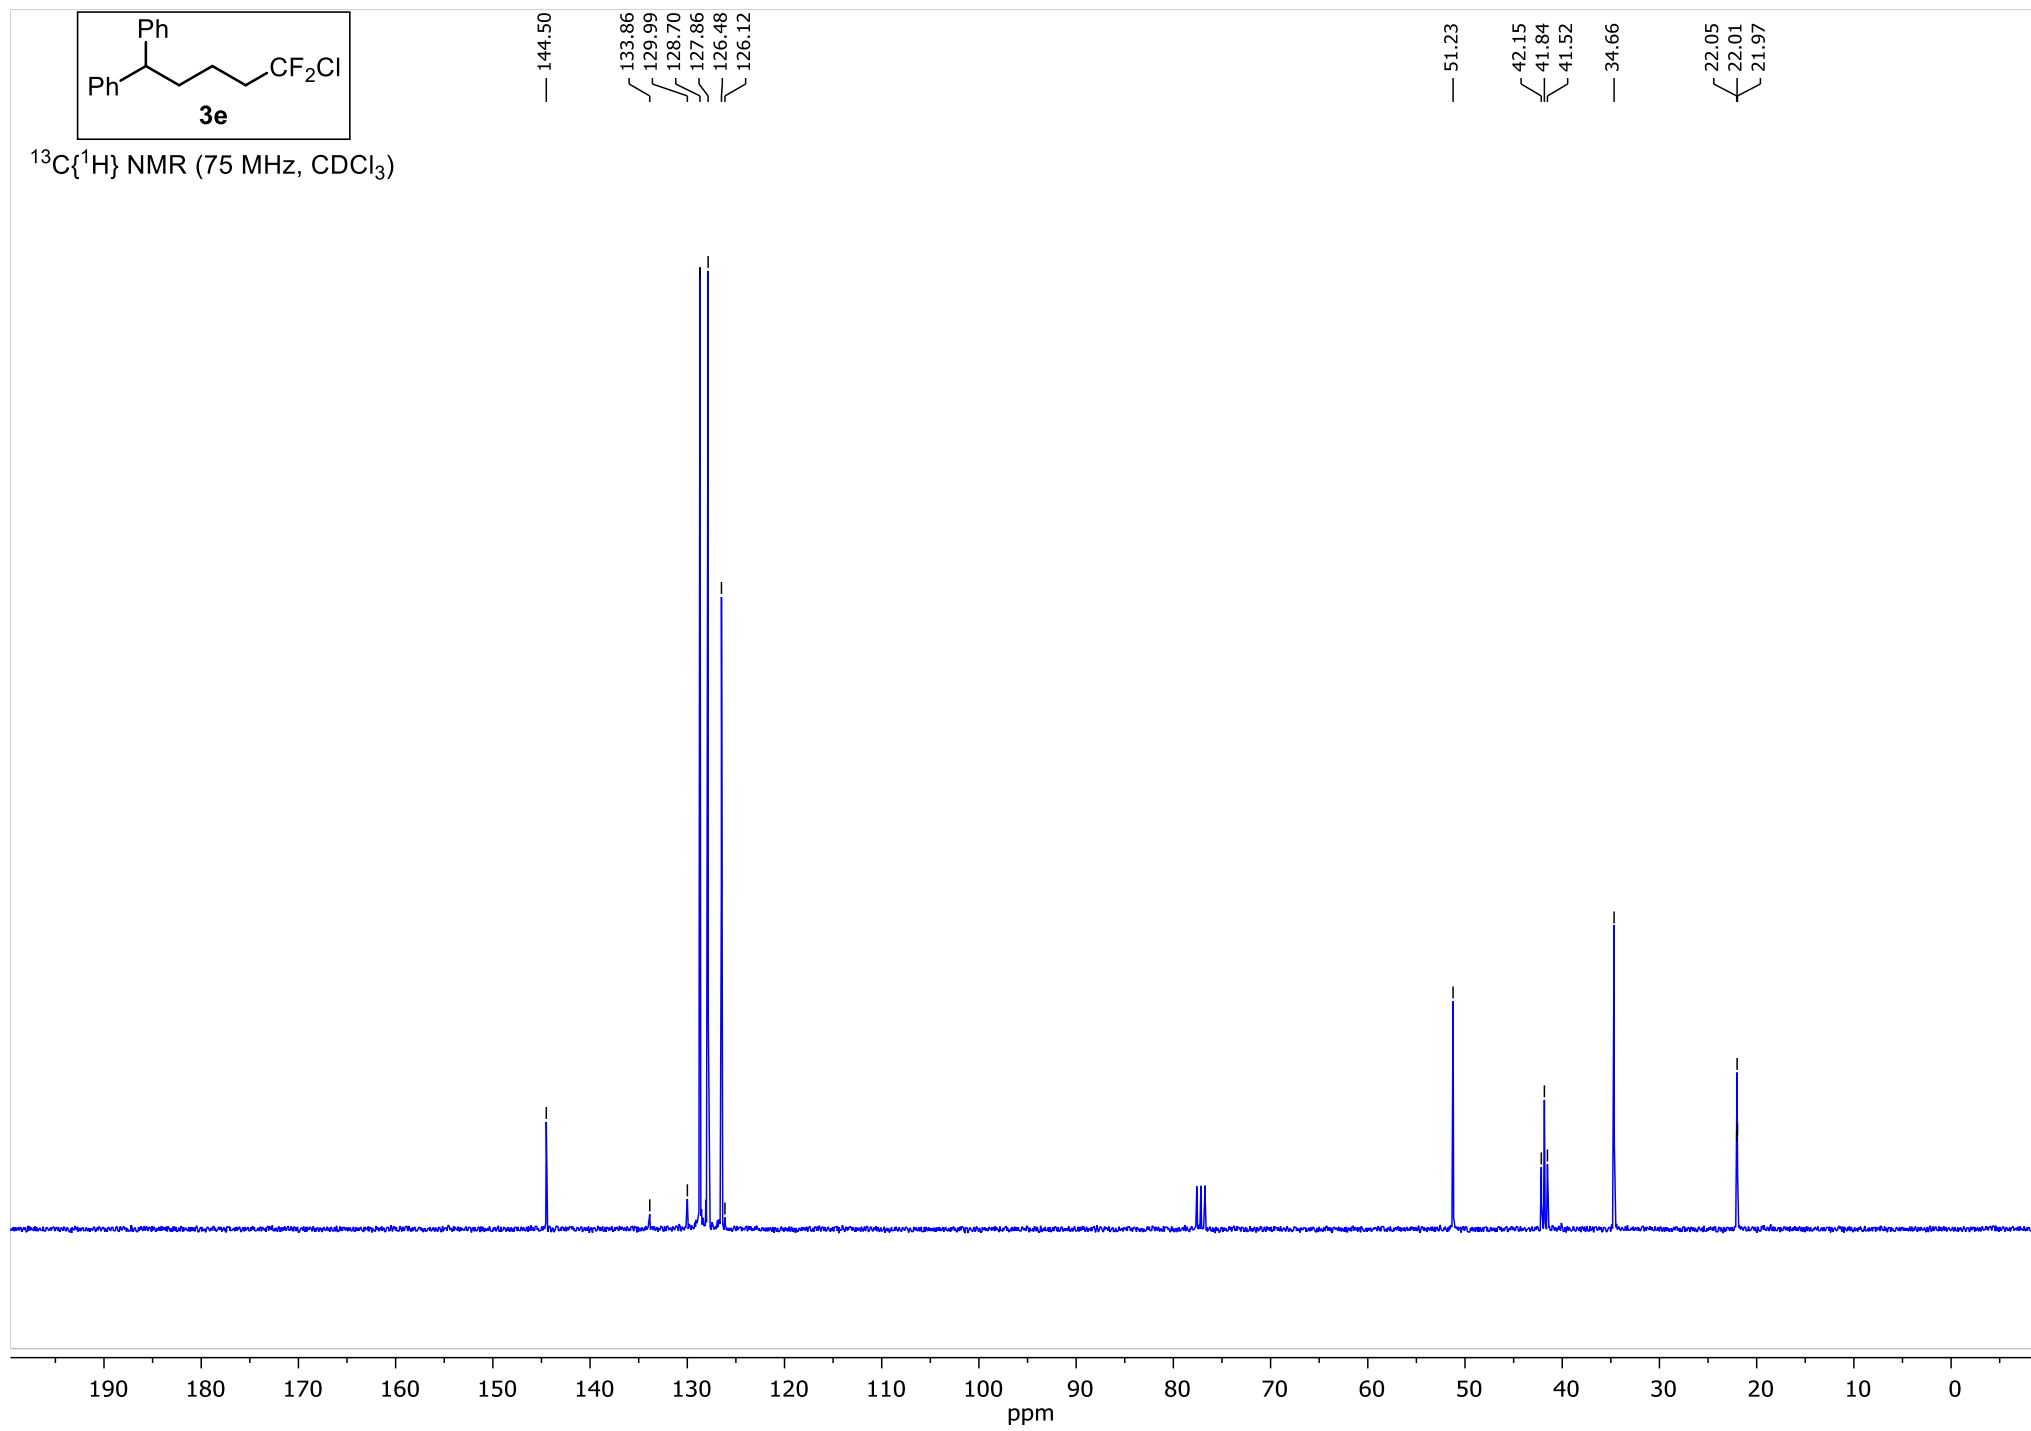

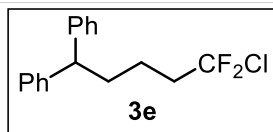

$^{19}\text{F}$  NMR (282 MHz,  $\text{CDCl}_3$ )

-51.03  
-51.08  
-51.12

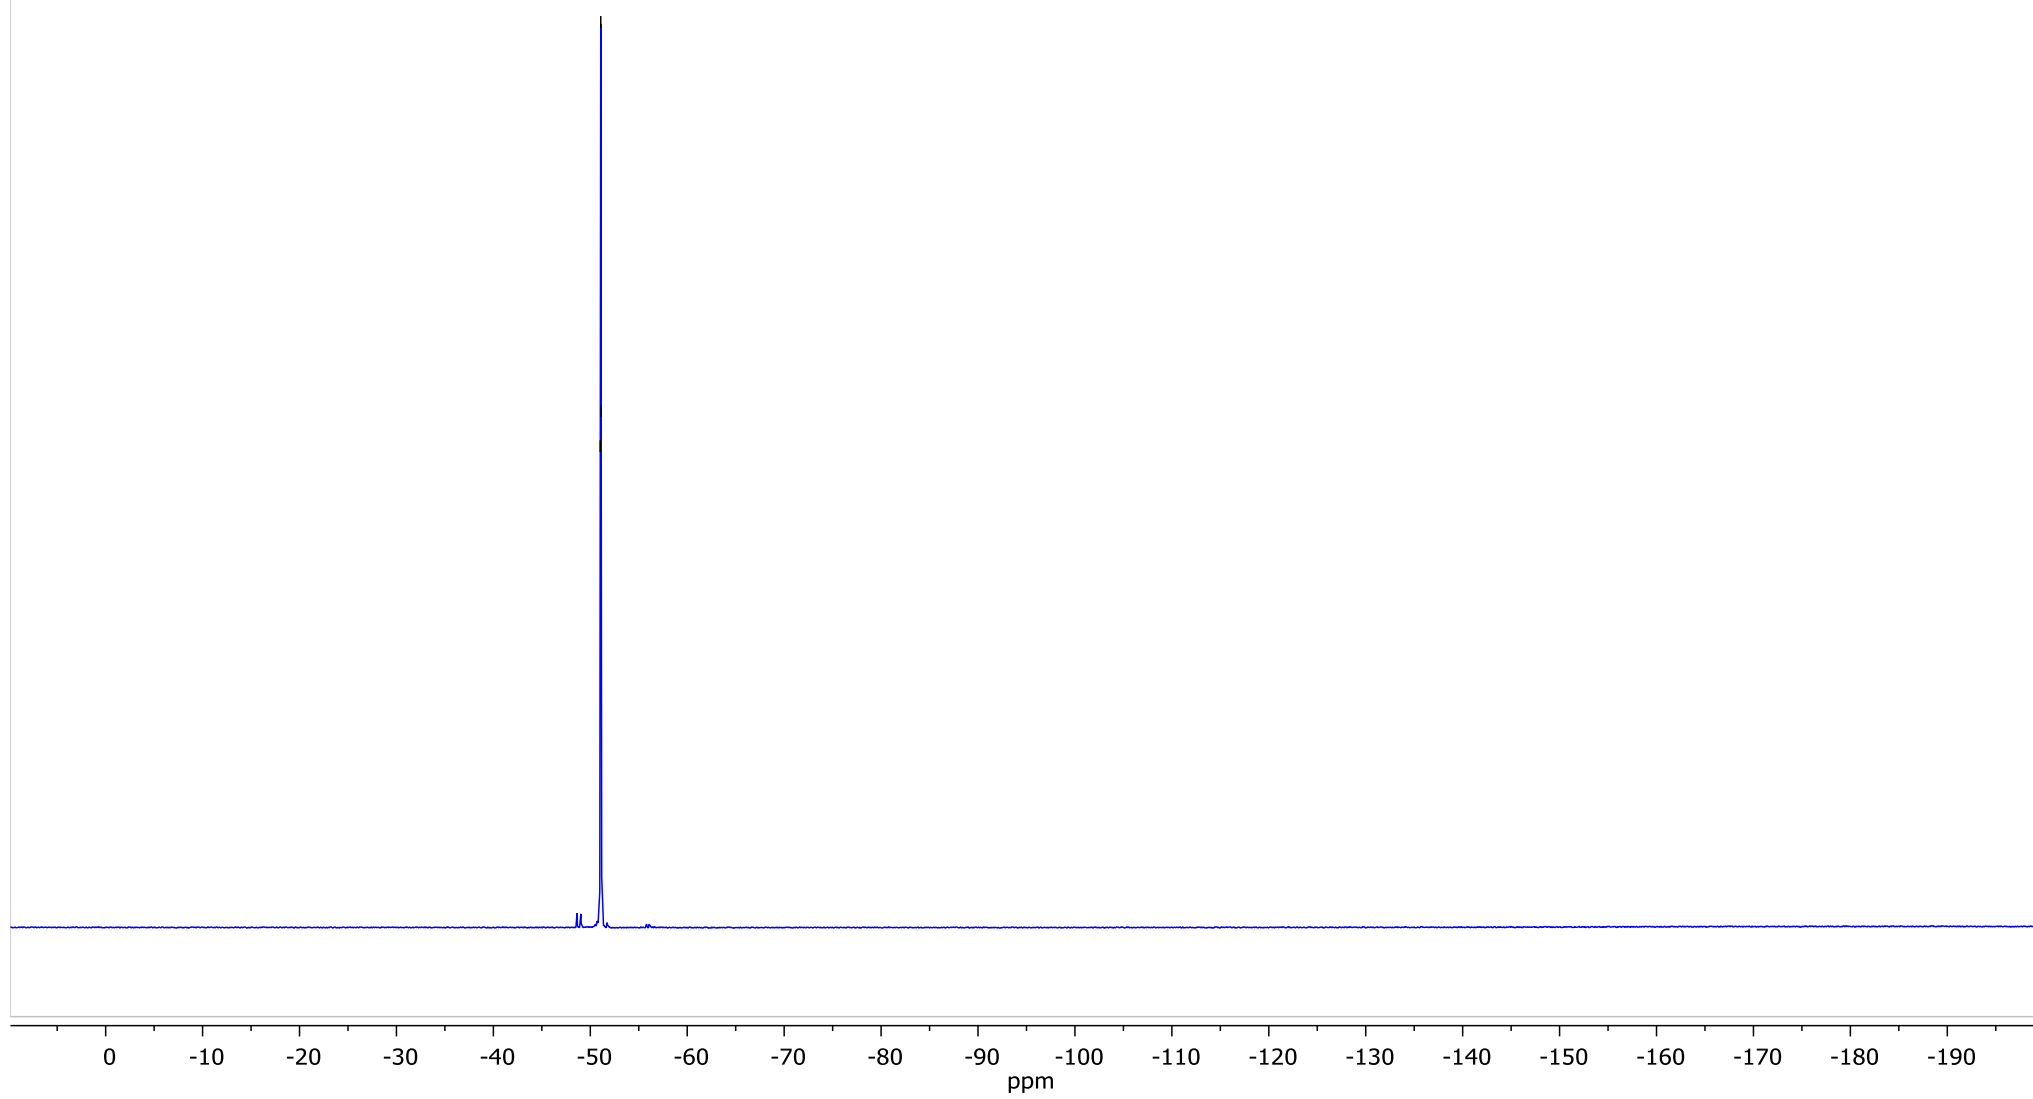



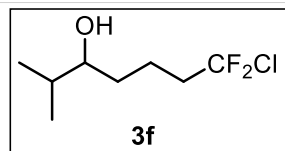

$^1\text{H}$  NMR (300 MHz,  $\text{CDCl}_3$ )

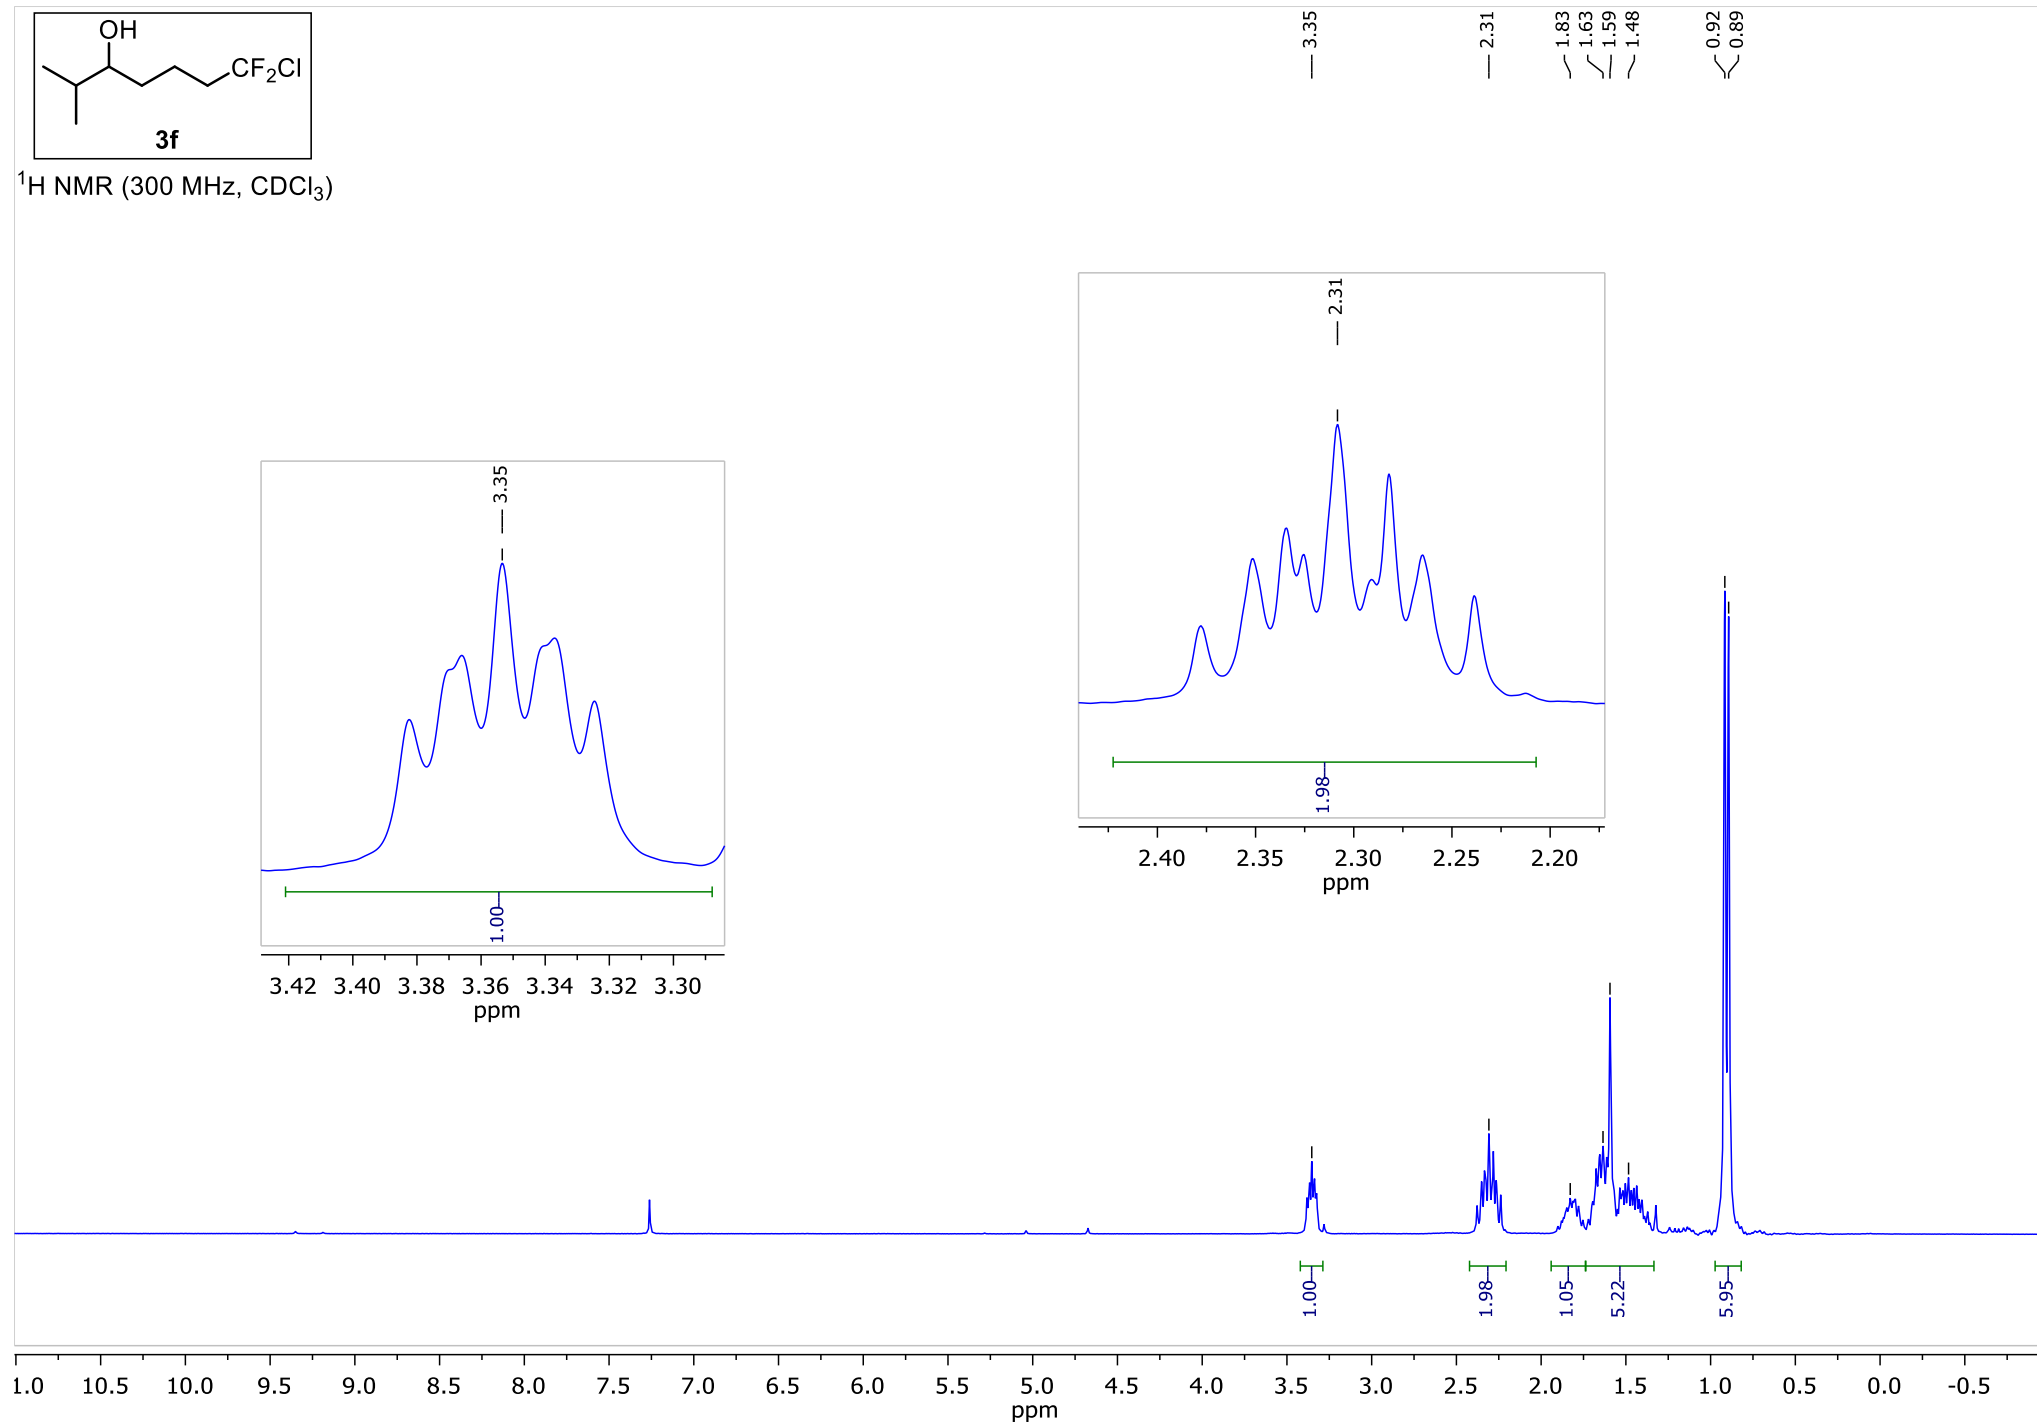

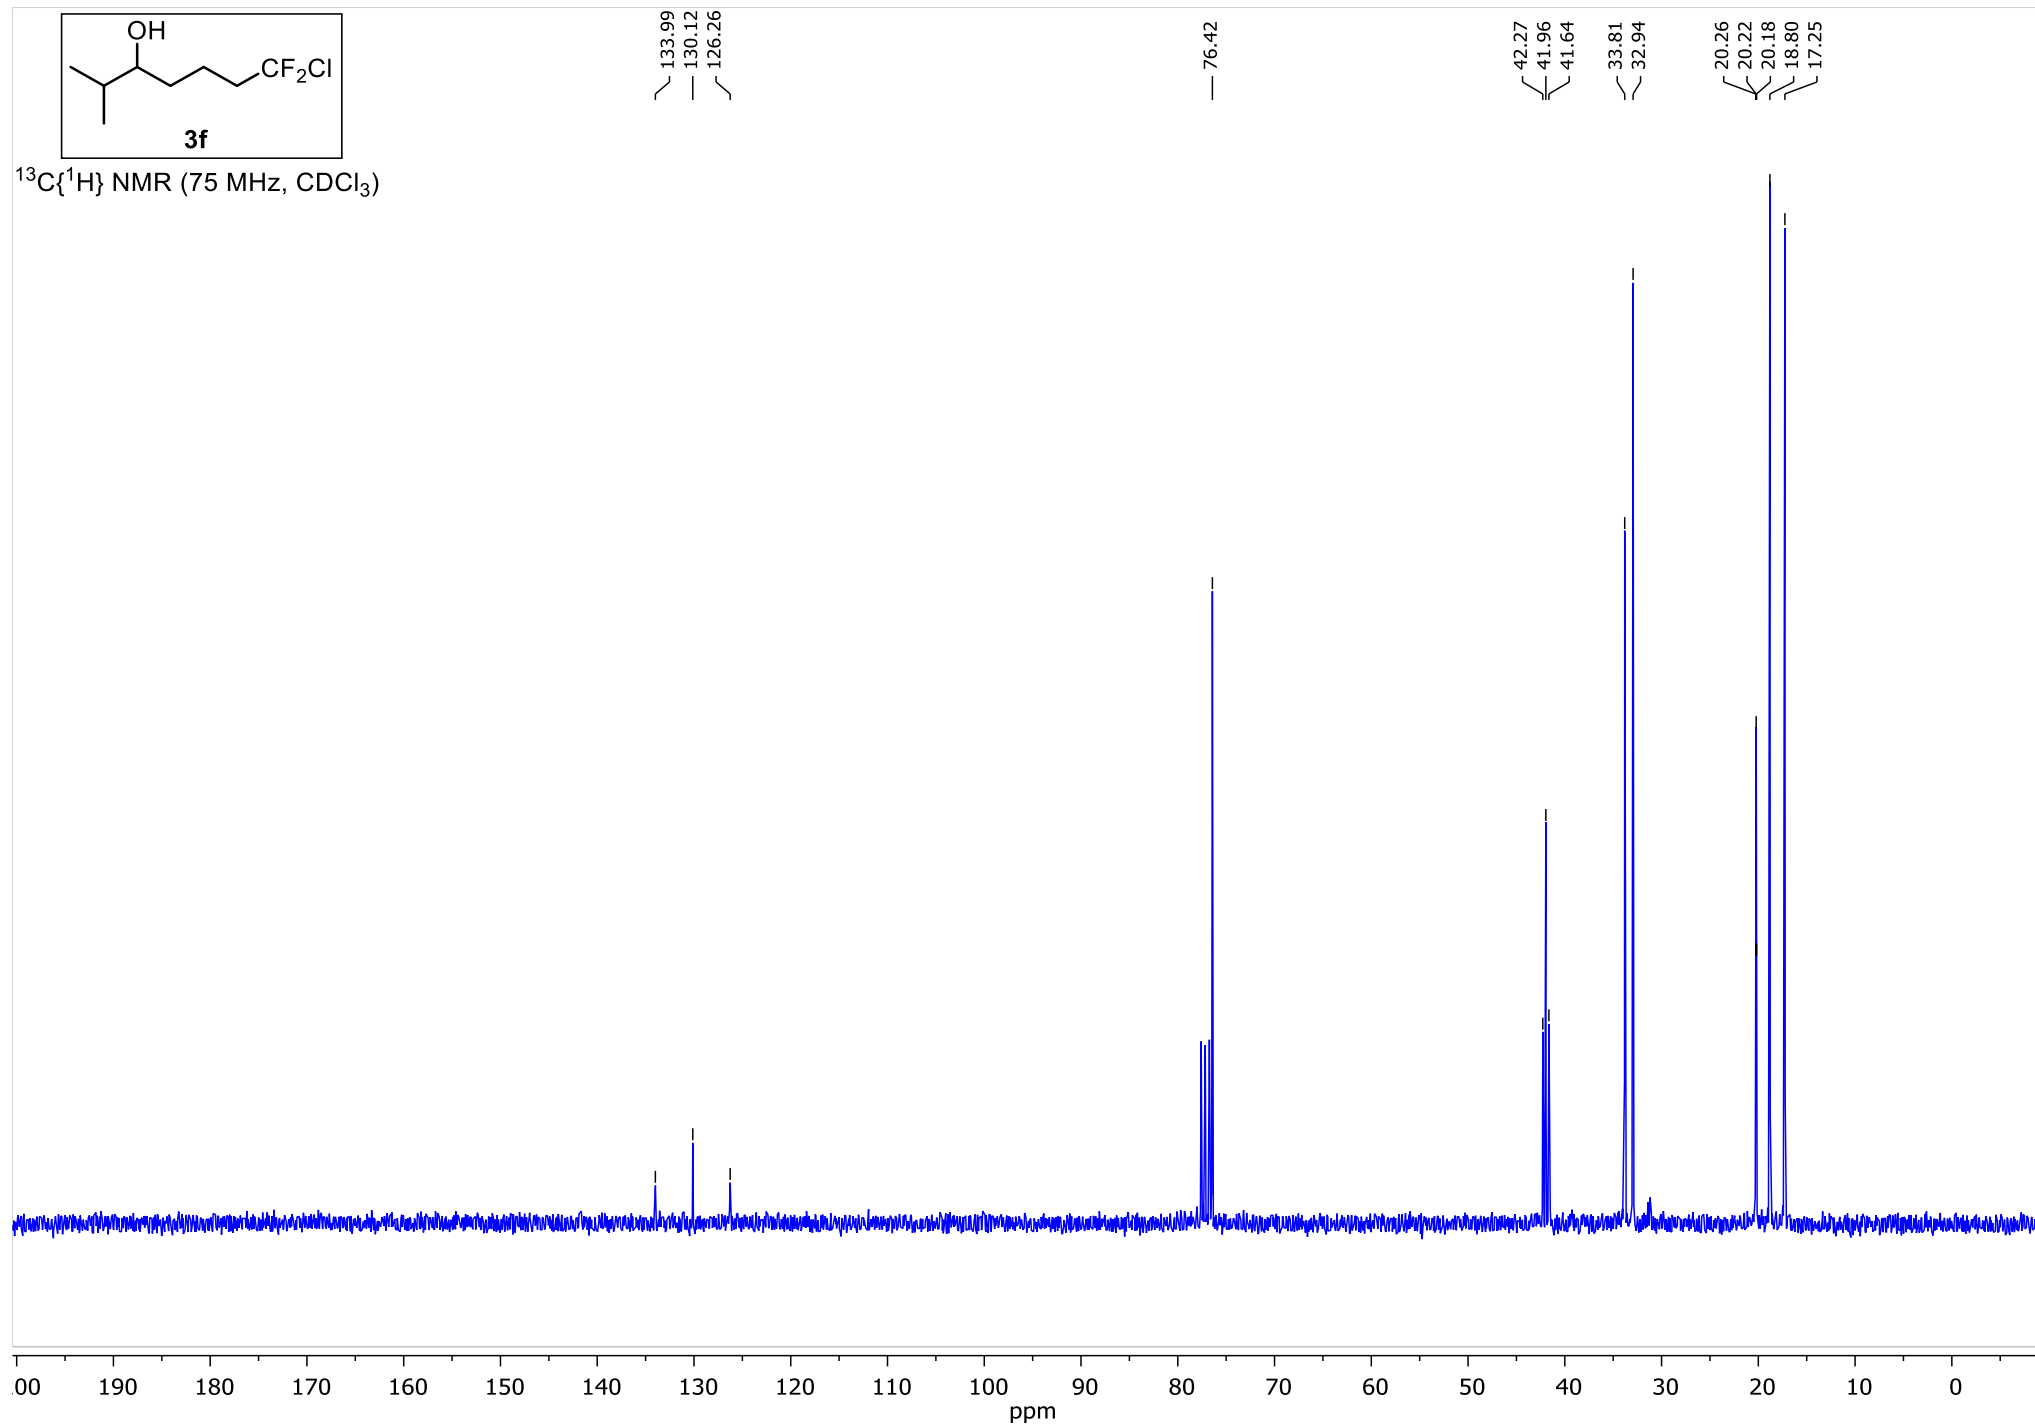

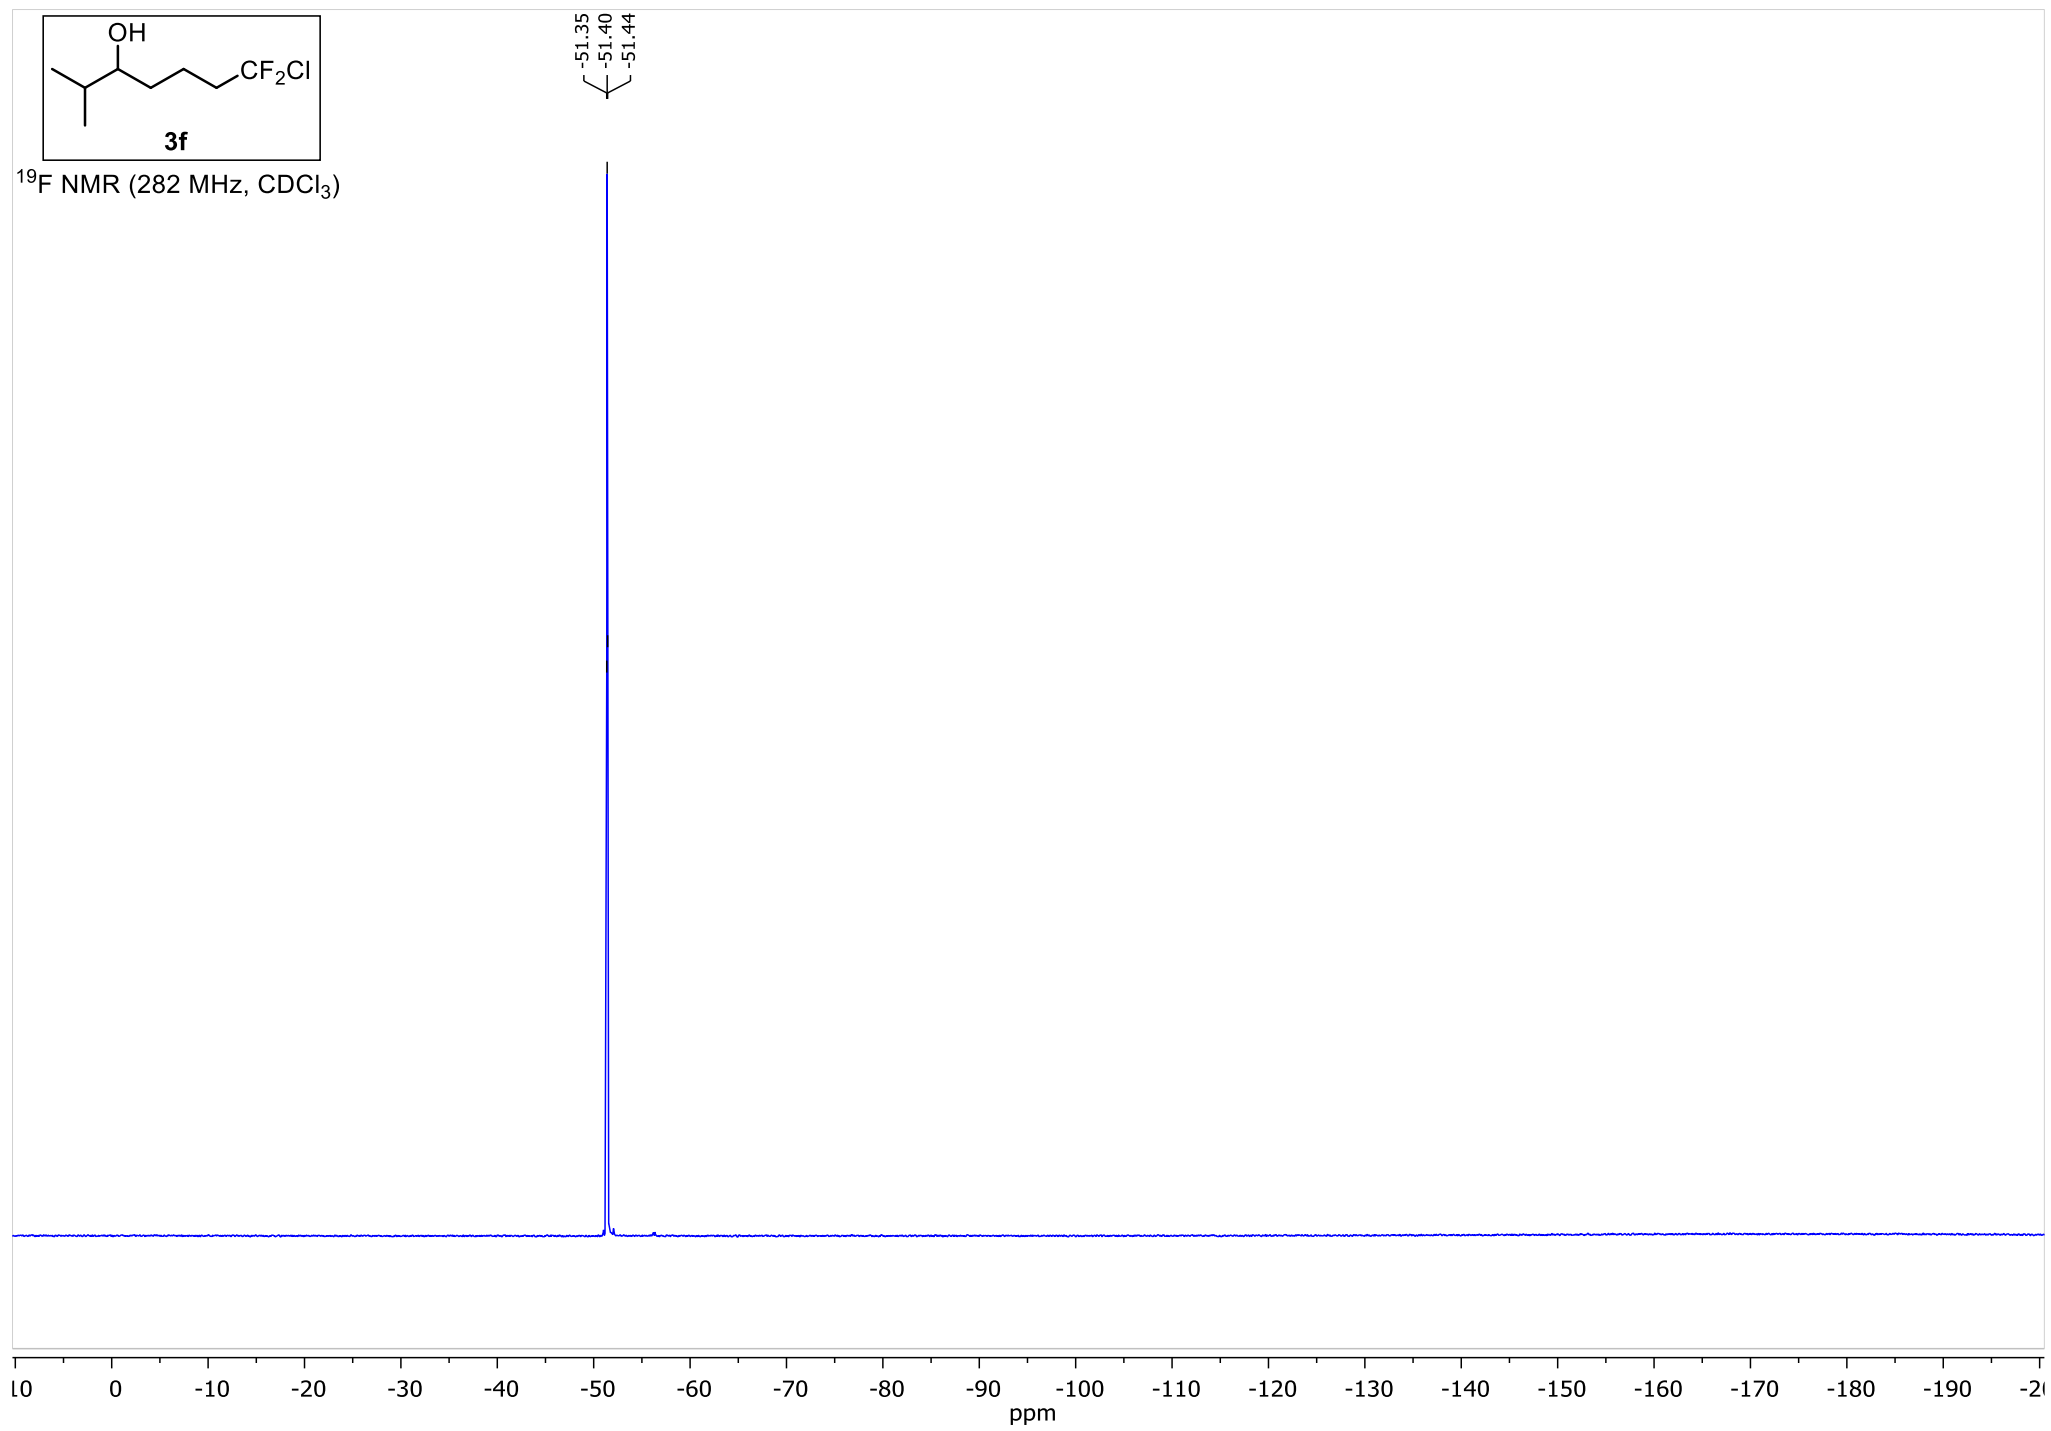

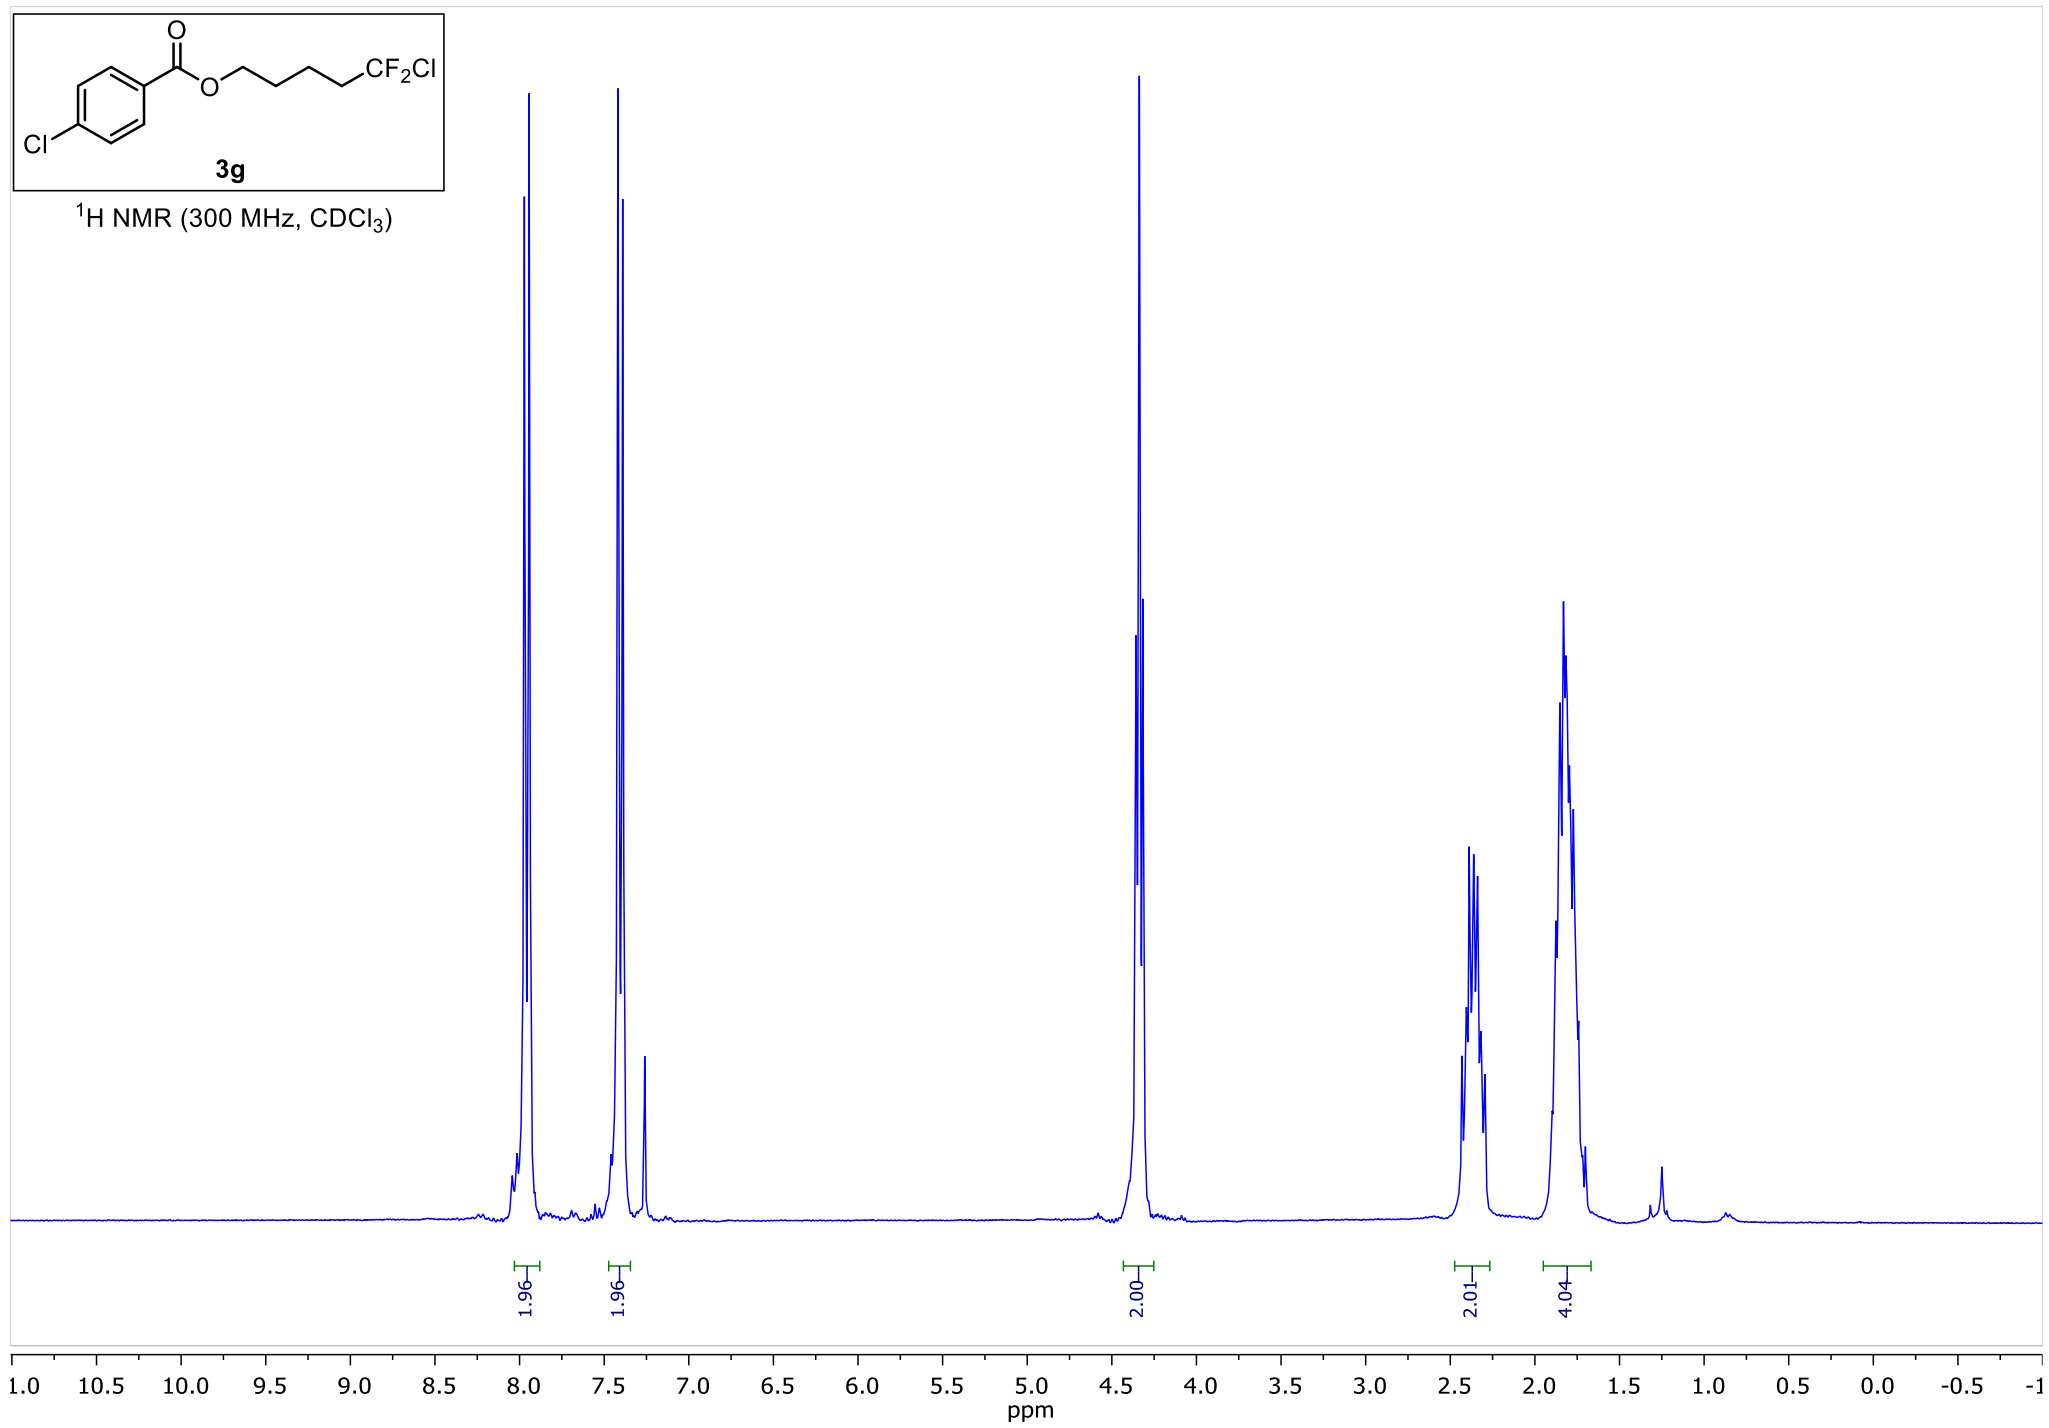

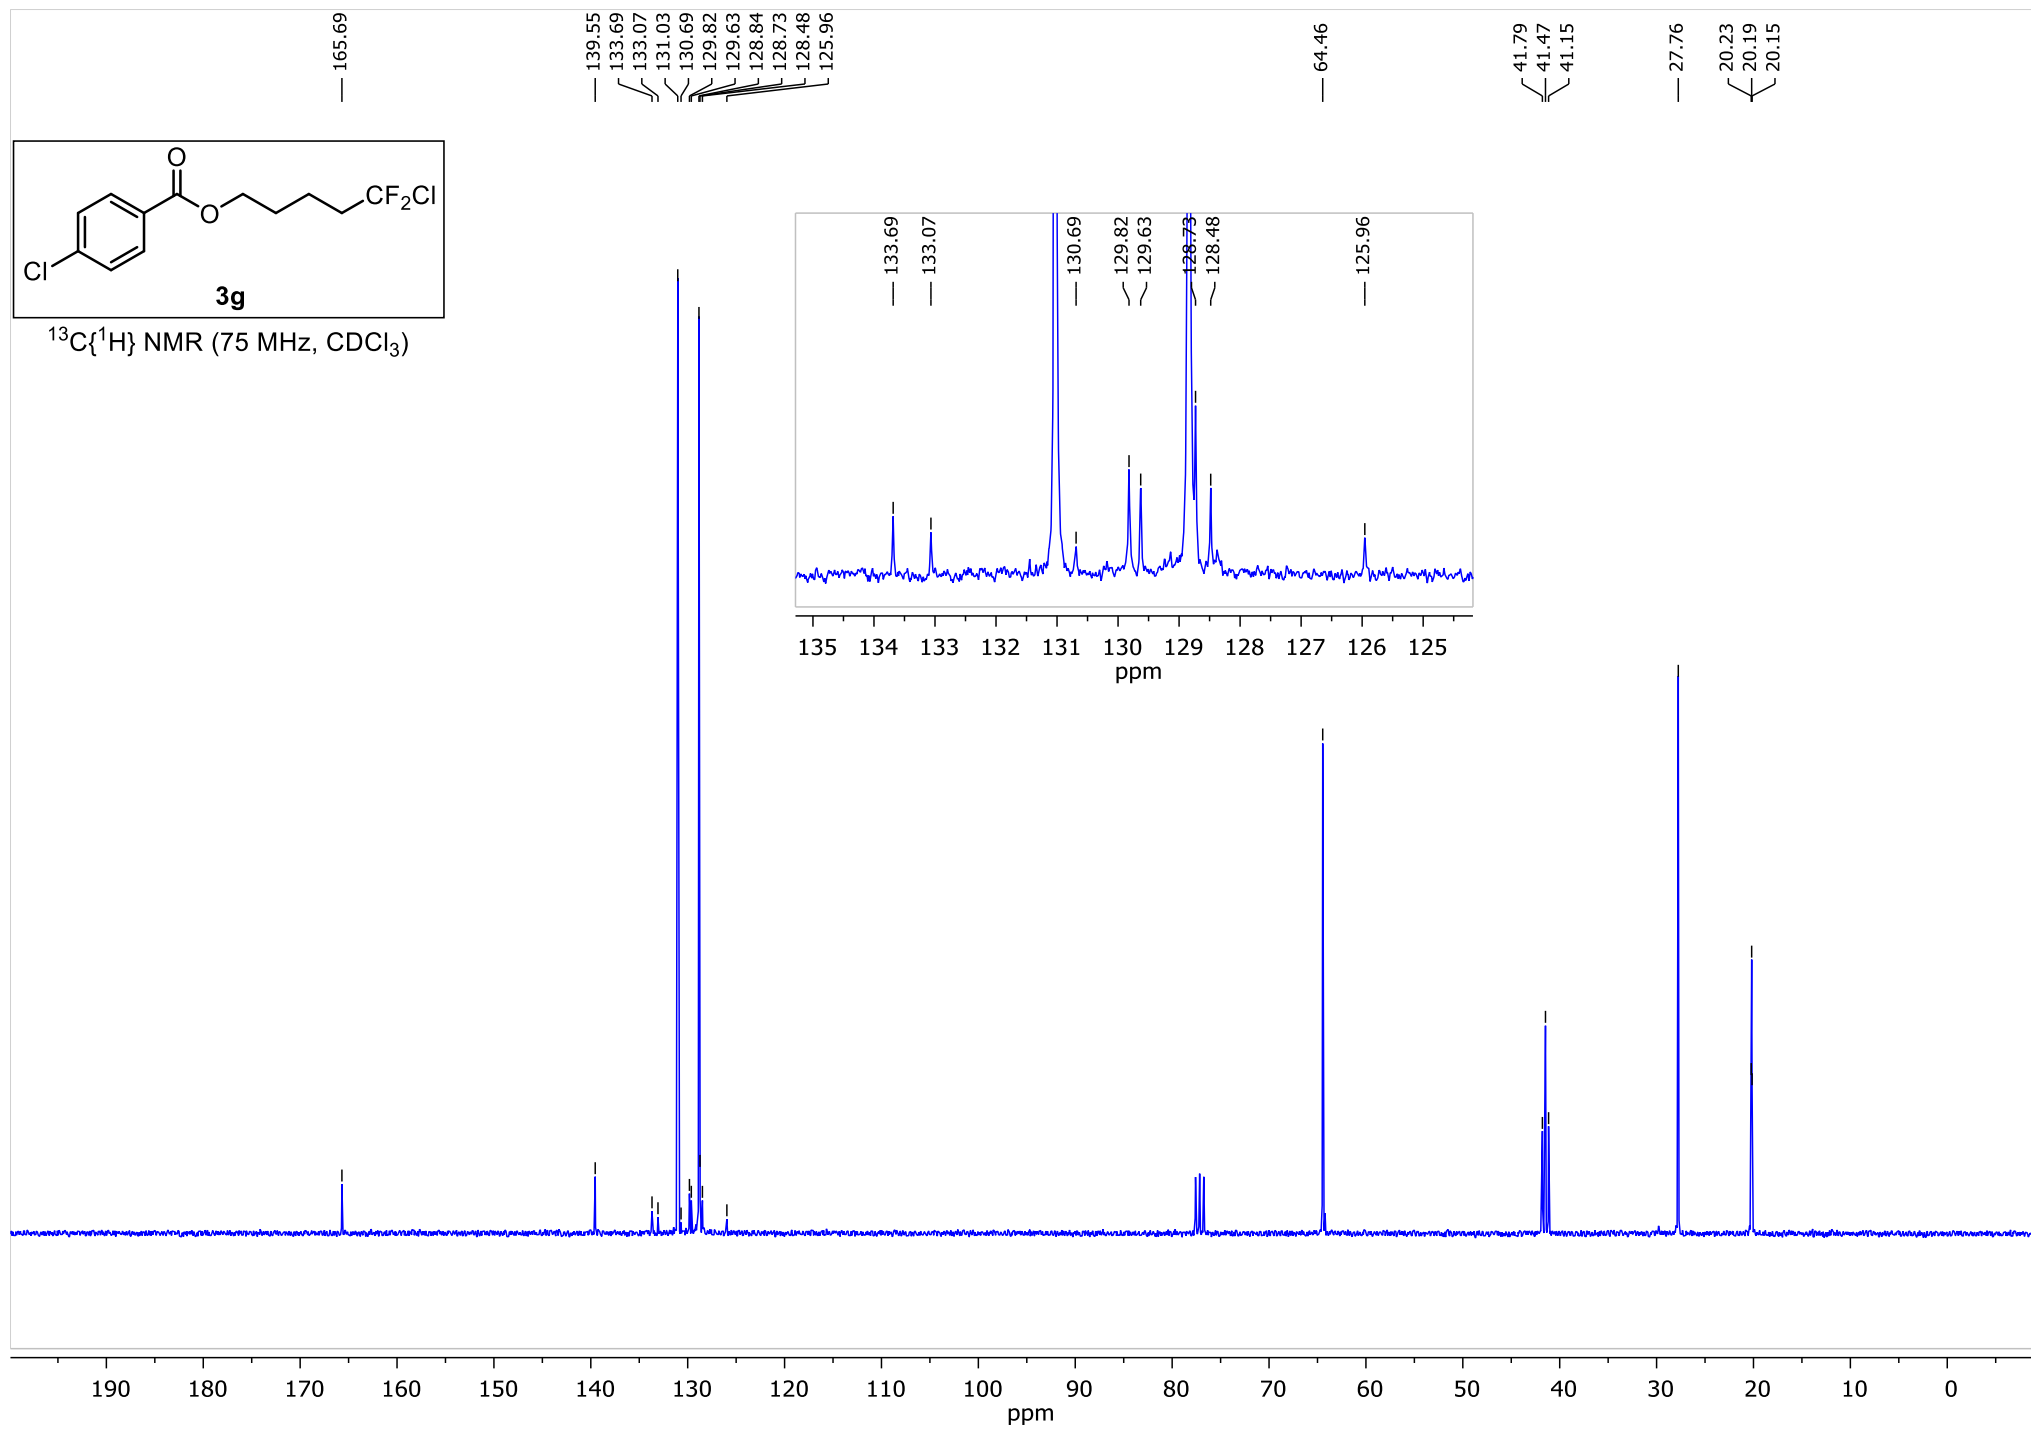

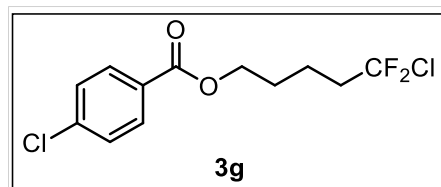

<sup>19</sup>F NMR (282 MHz, CDCl<sub>3</sub>)

-51.45  
-51.50  
-51.54

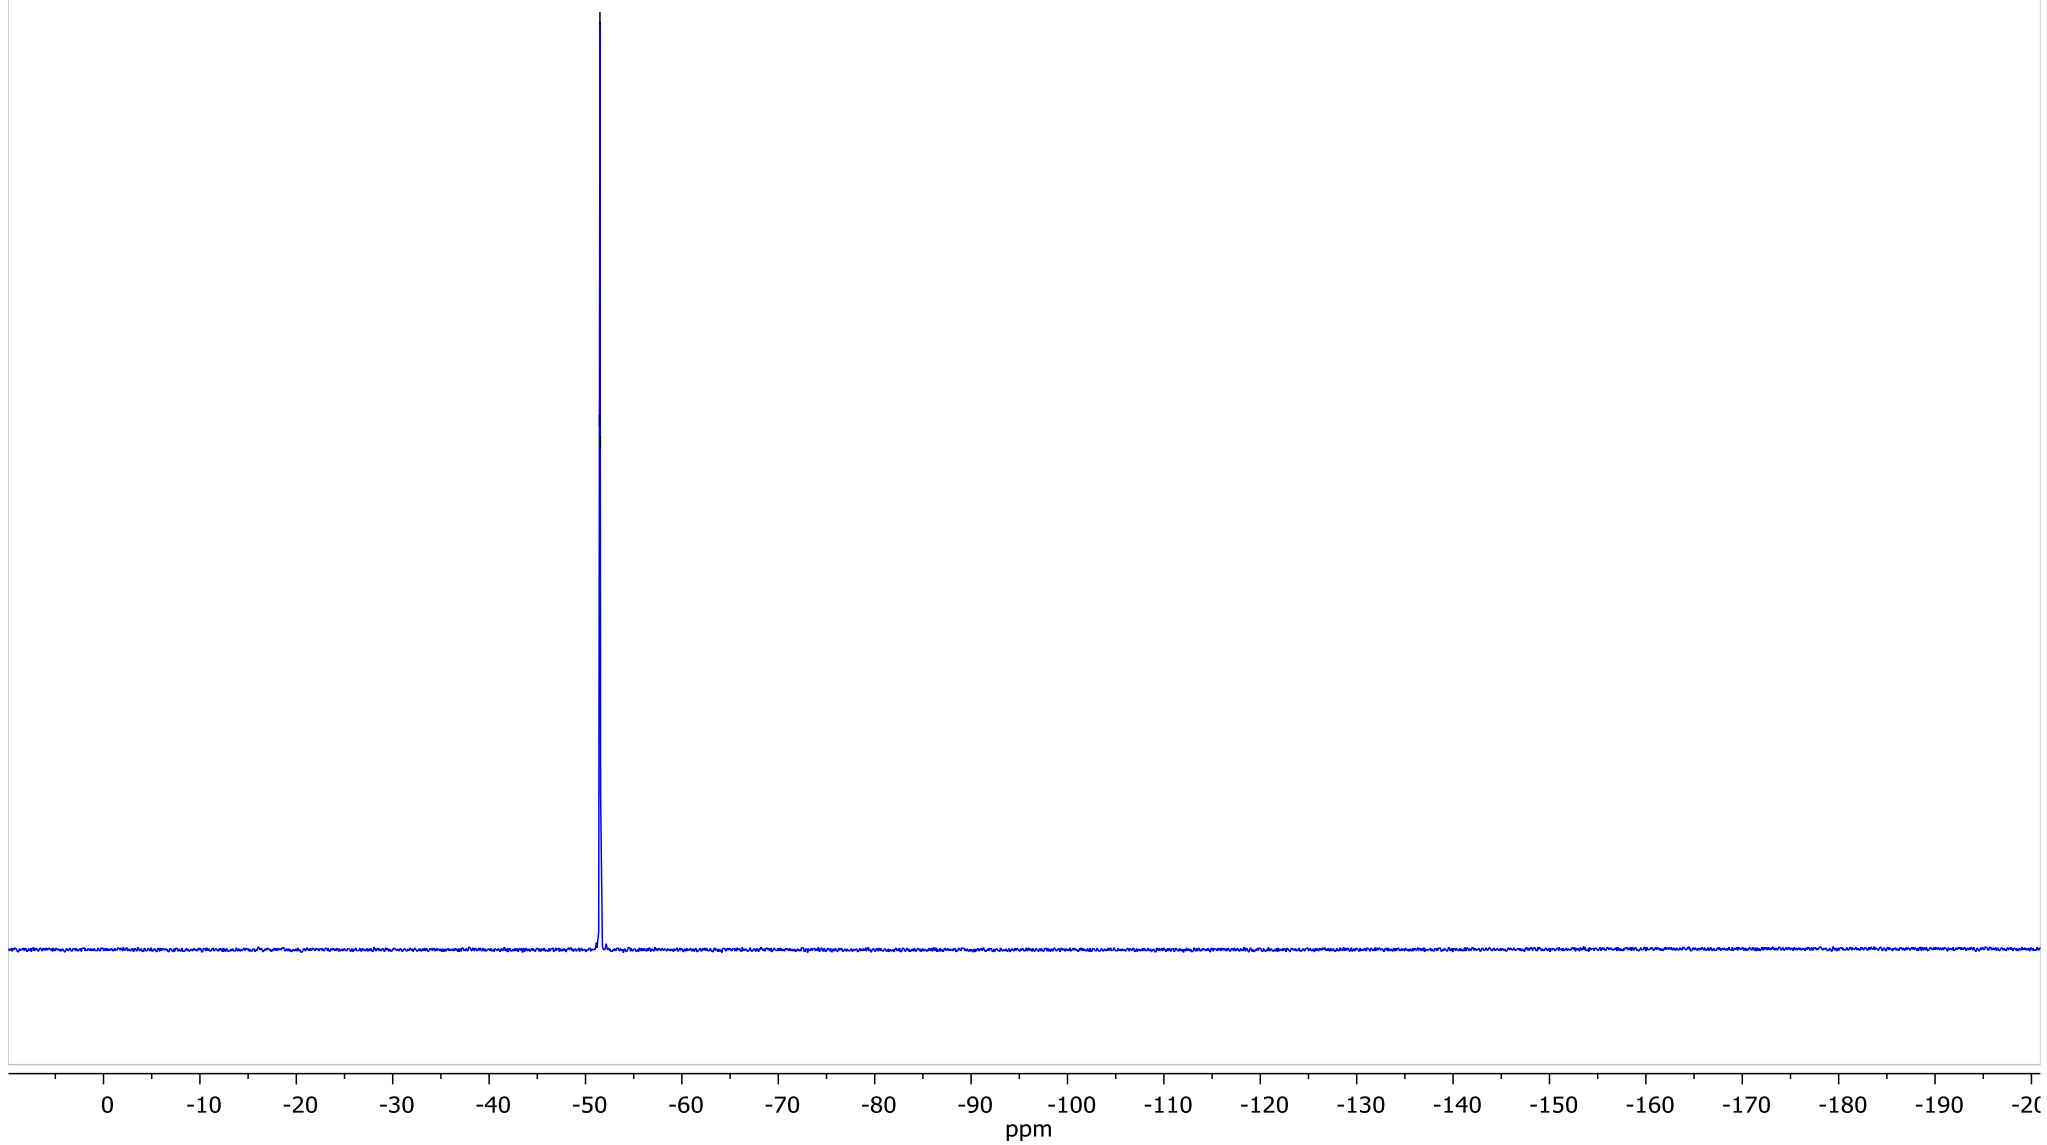

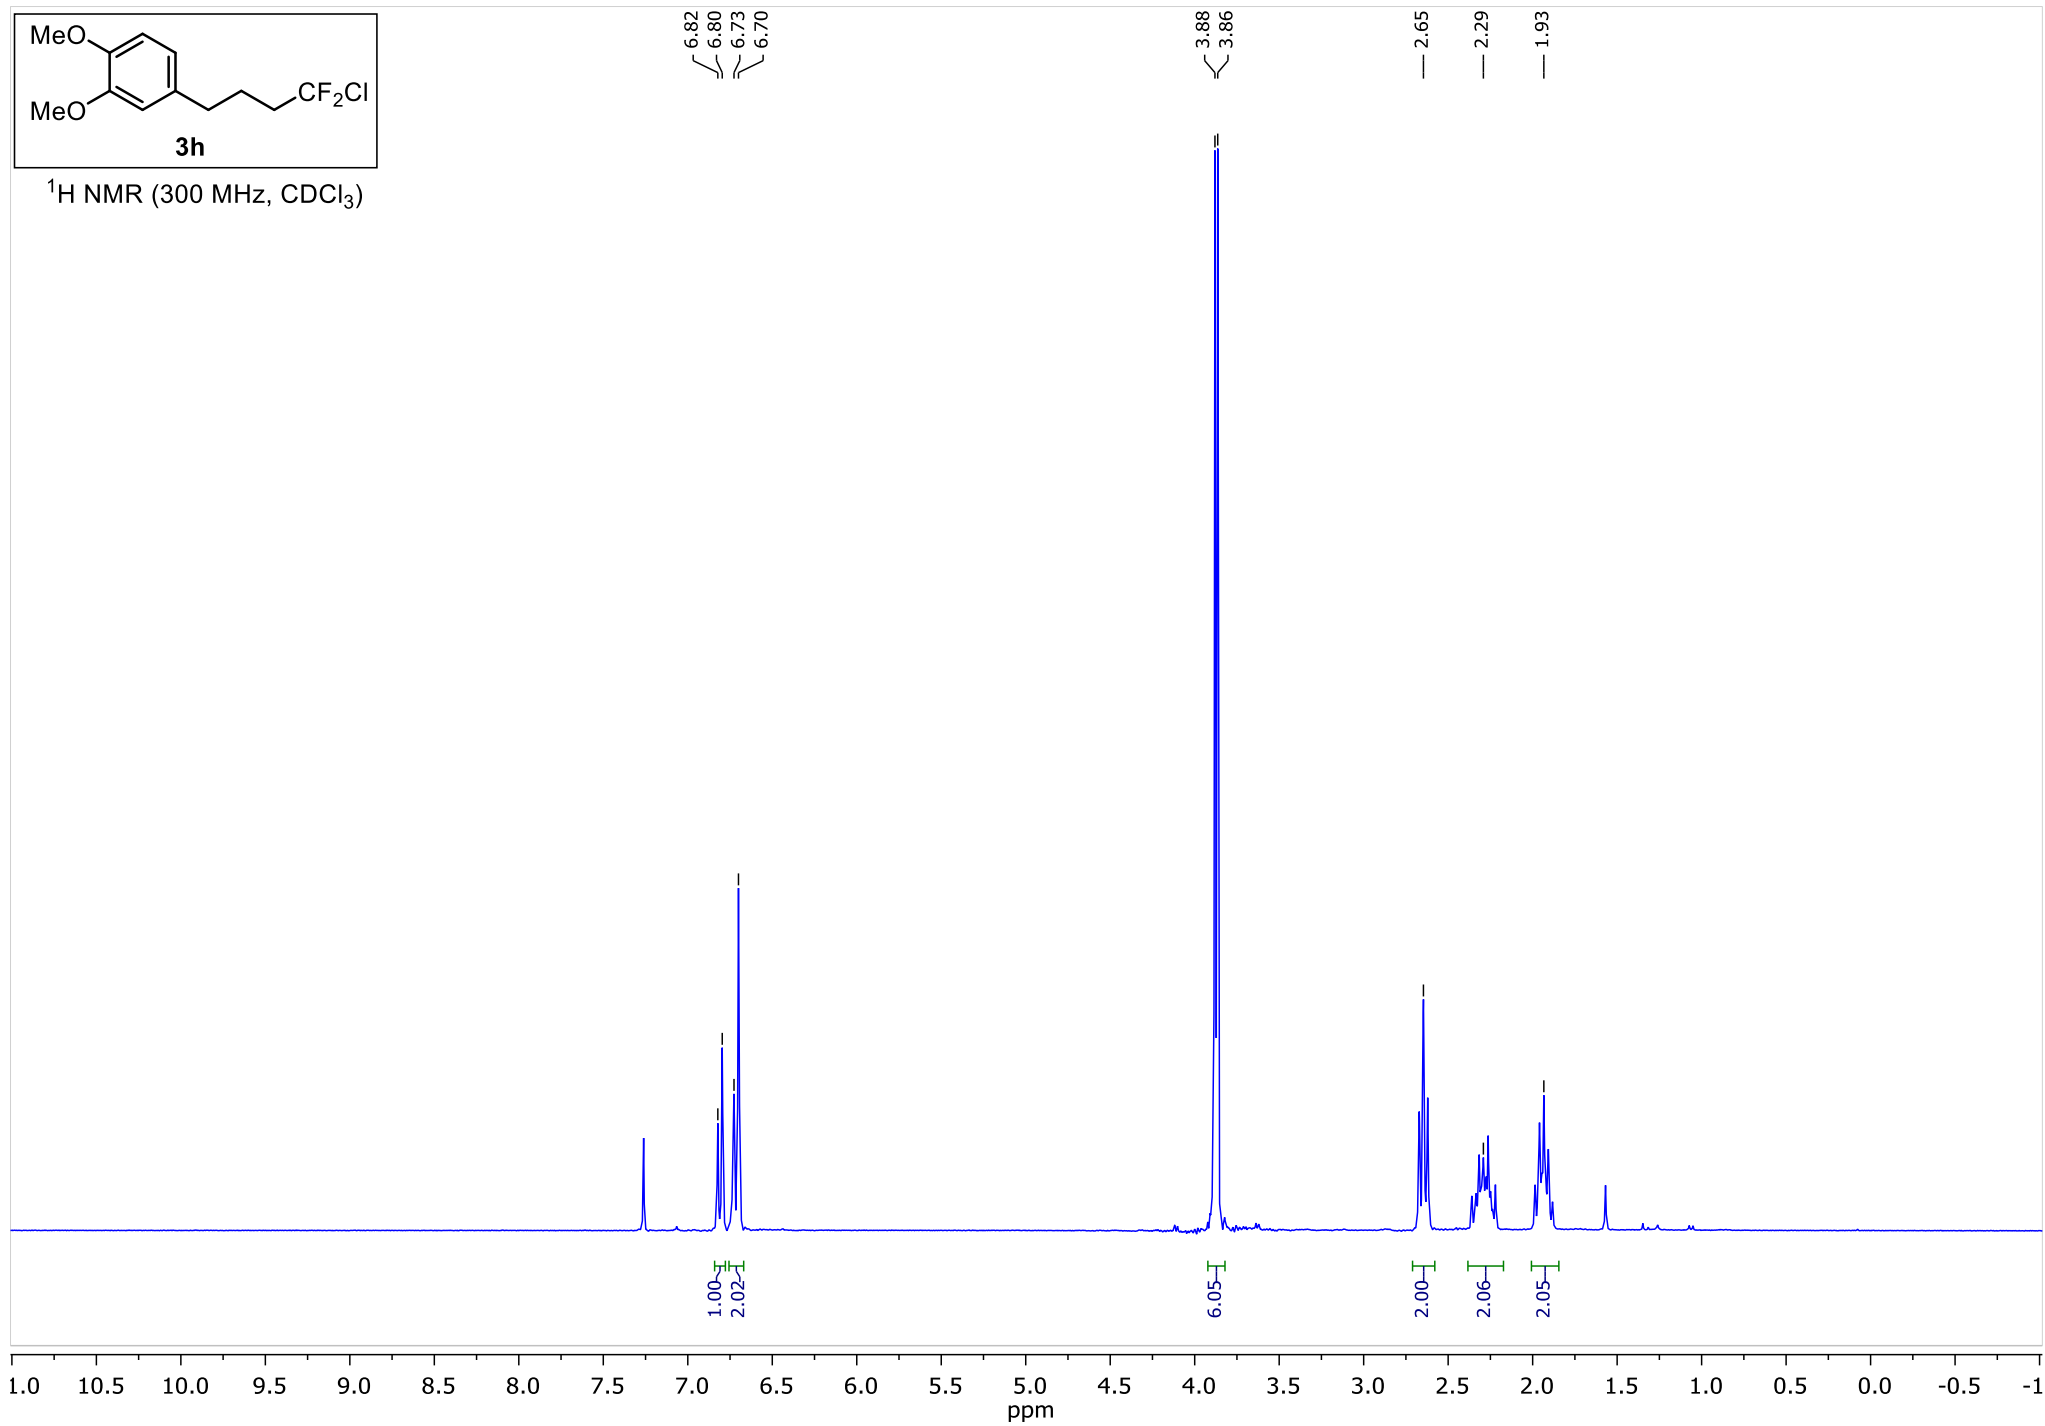

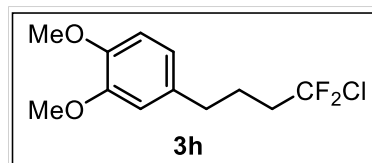

$^{13}\text{C}\{^1\text{H}\}$  NMR (75 MHz,  $\text{CDCl}_3$ )

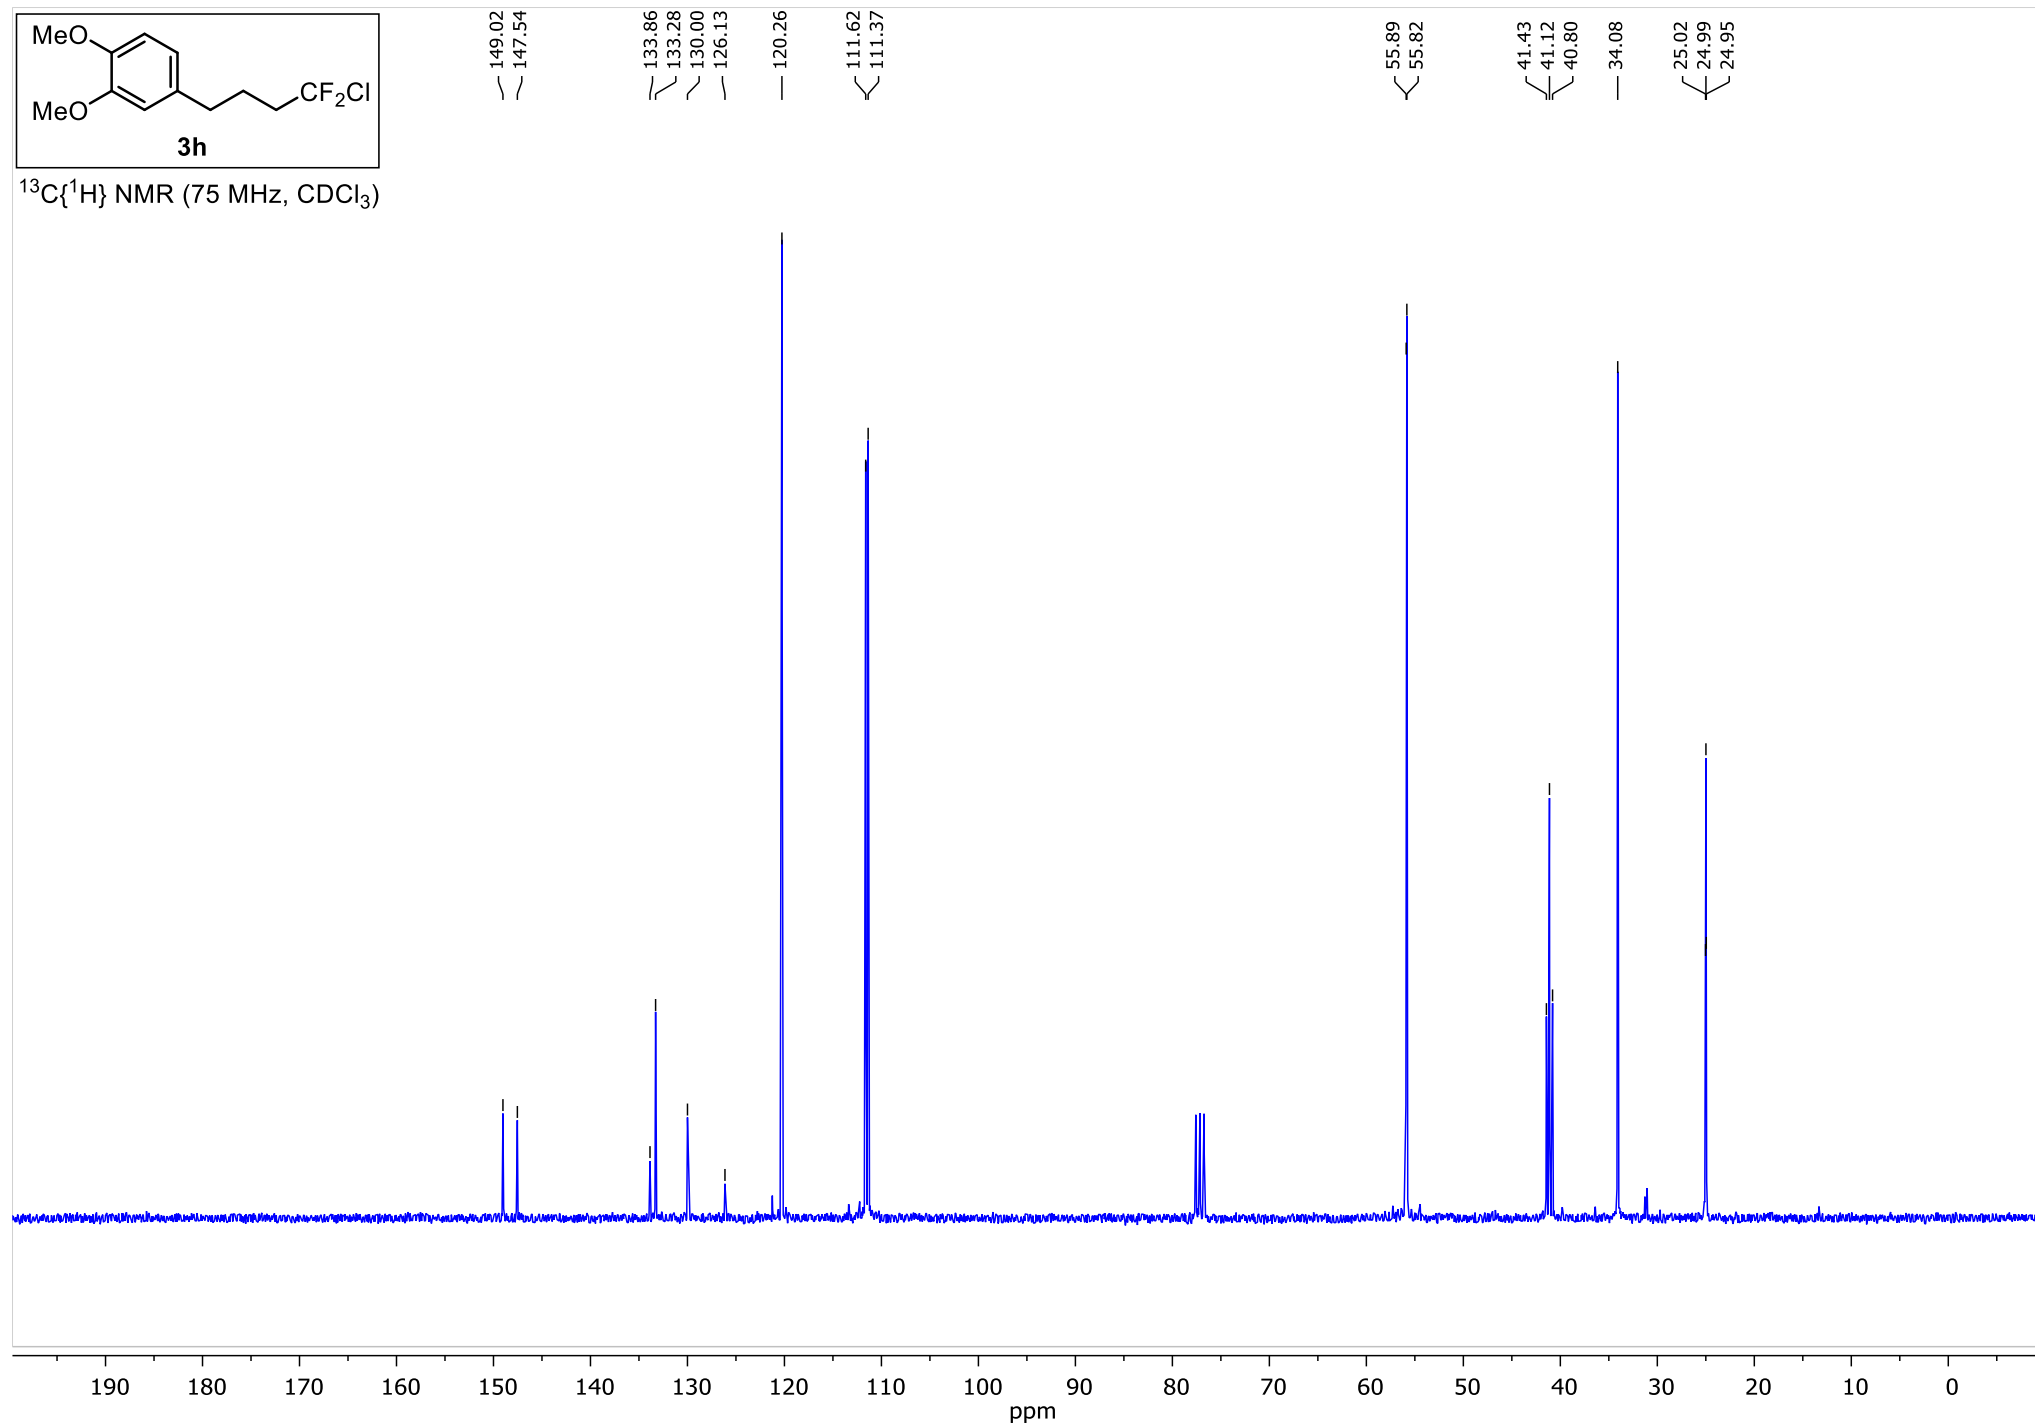



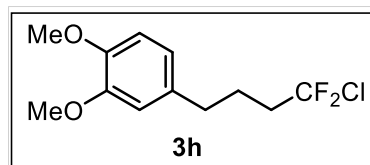

$^{19}\text{F}$  NMR (282 MHz,  $\text{CDCl}_3$ )

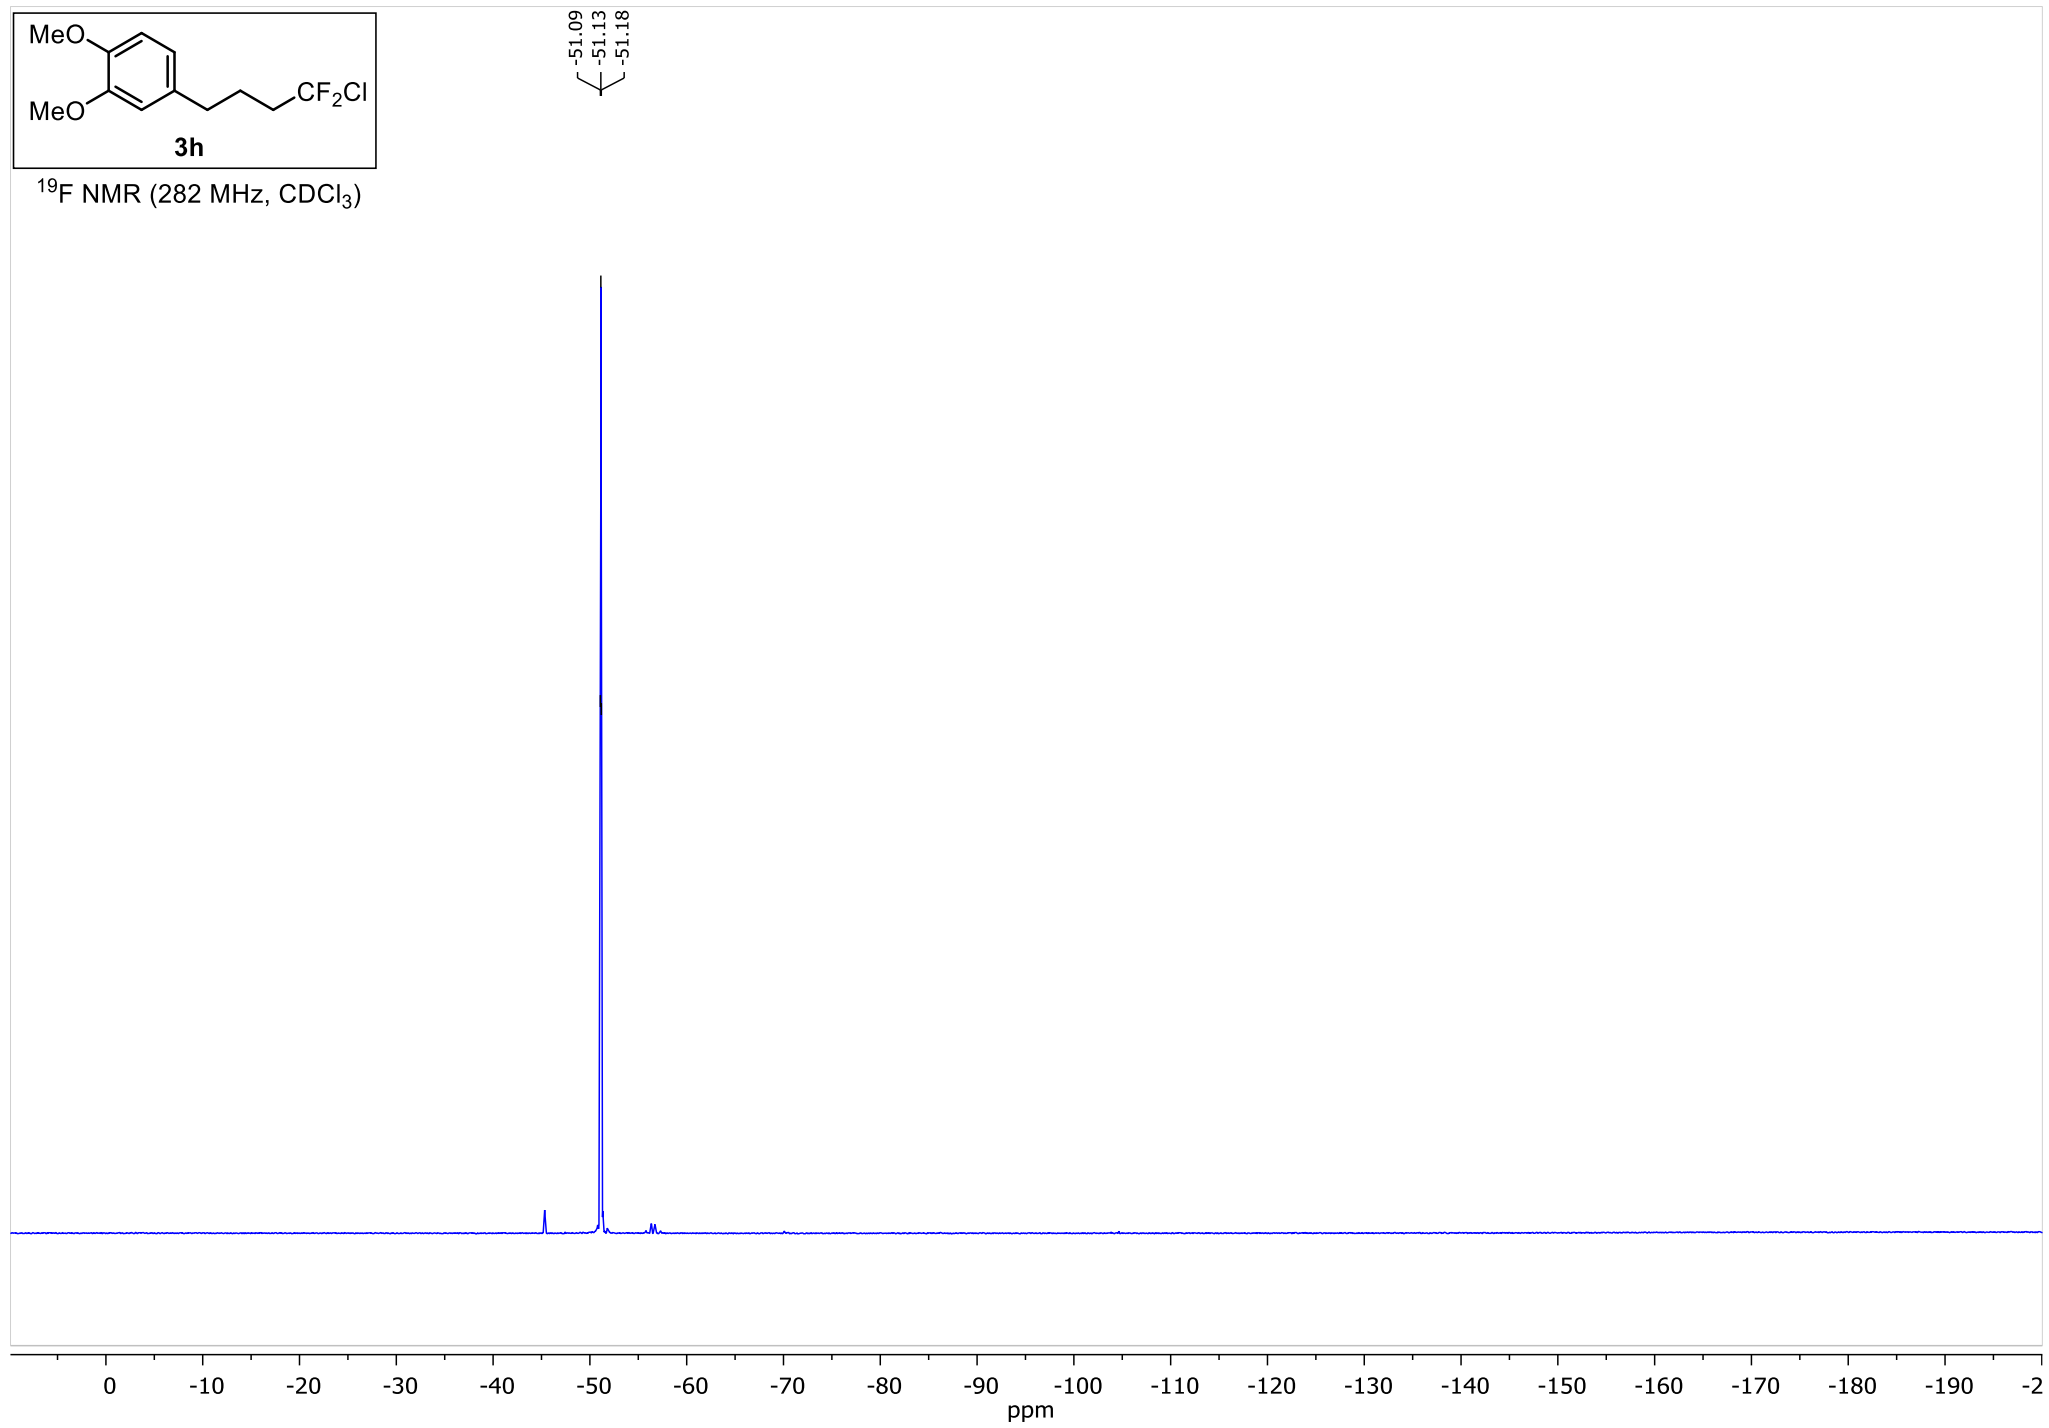

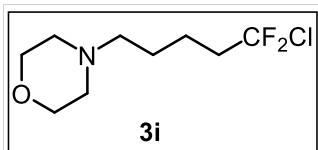

$^1\text{H}$  NMR (300 MHz,  $\text{CDCl}_3$ )

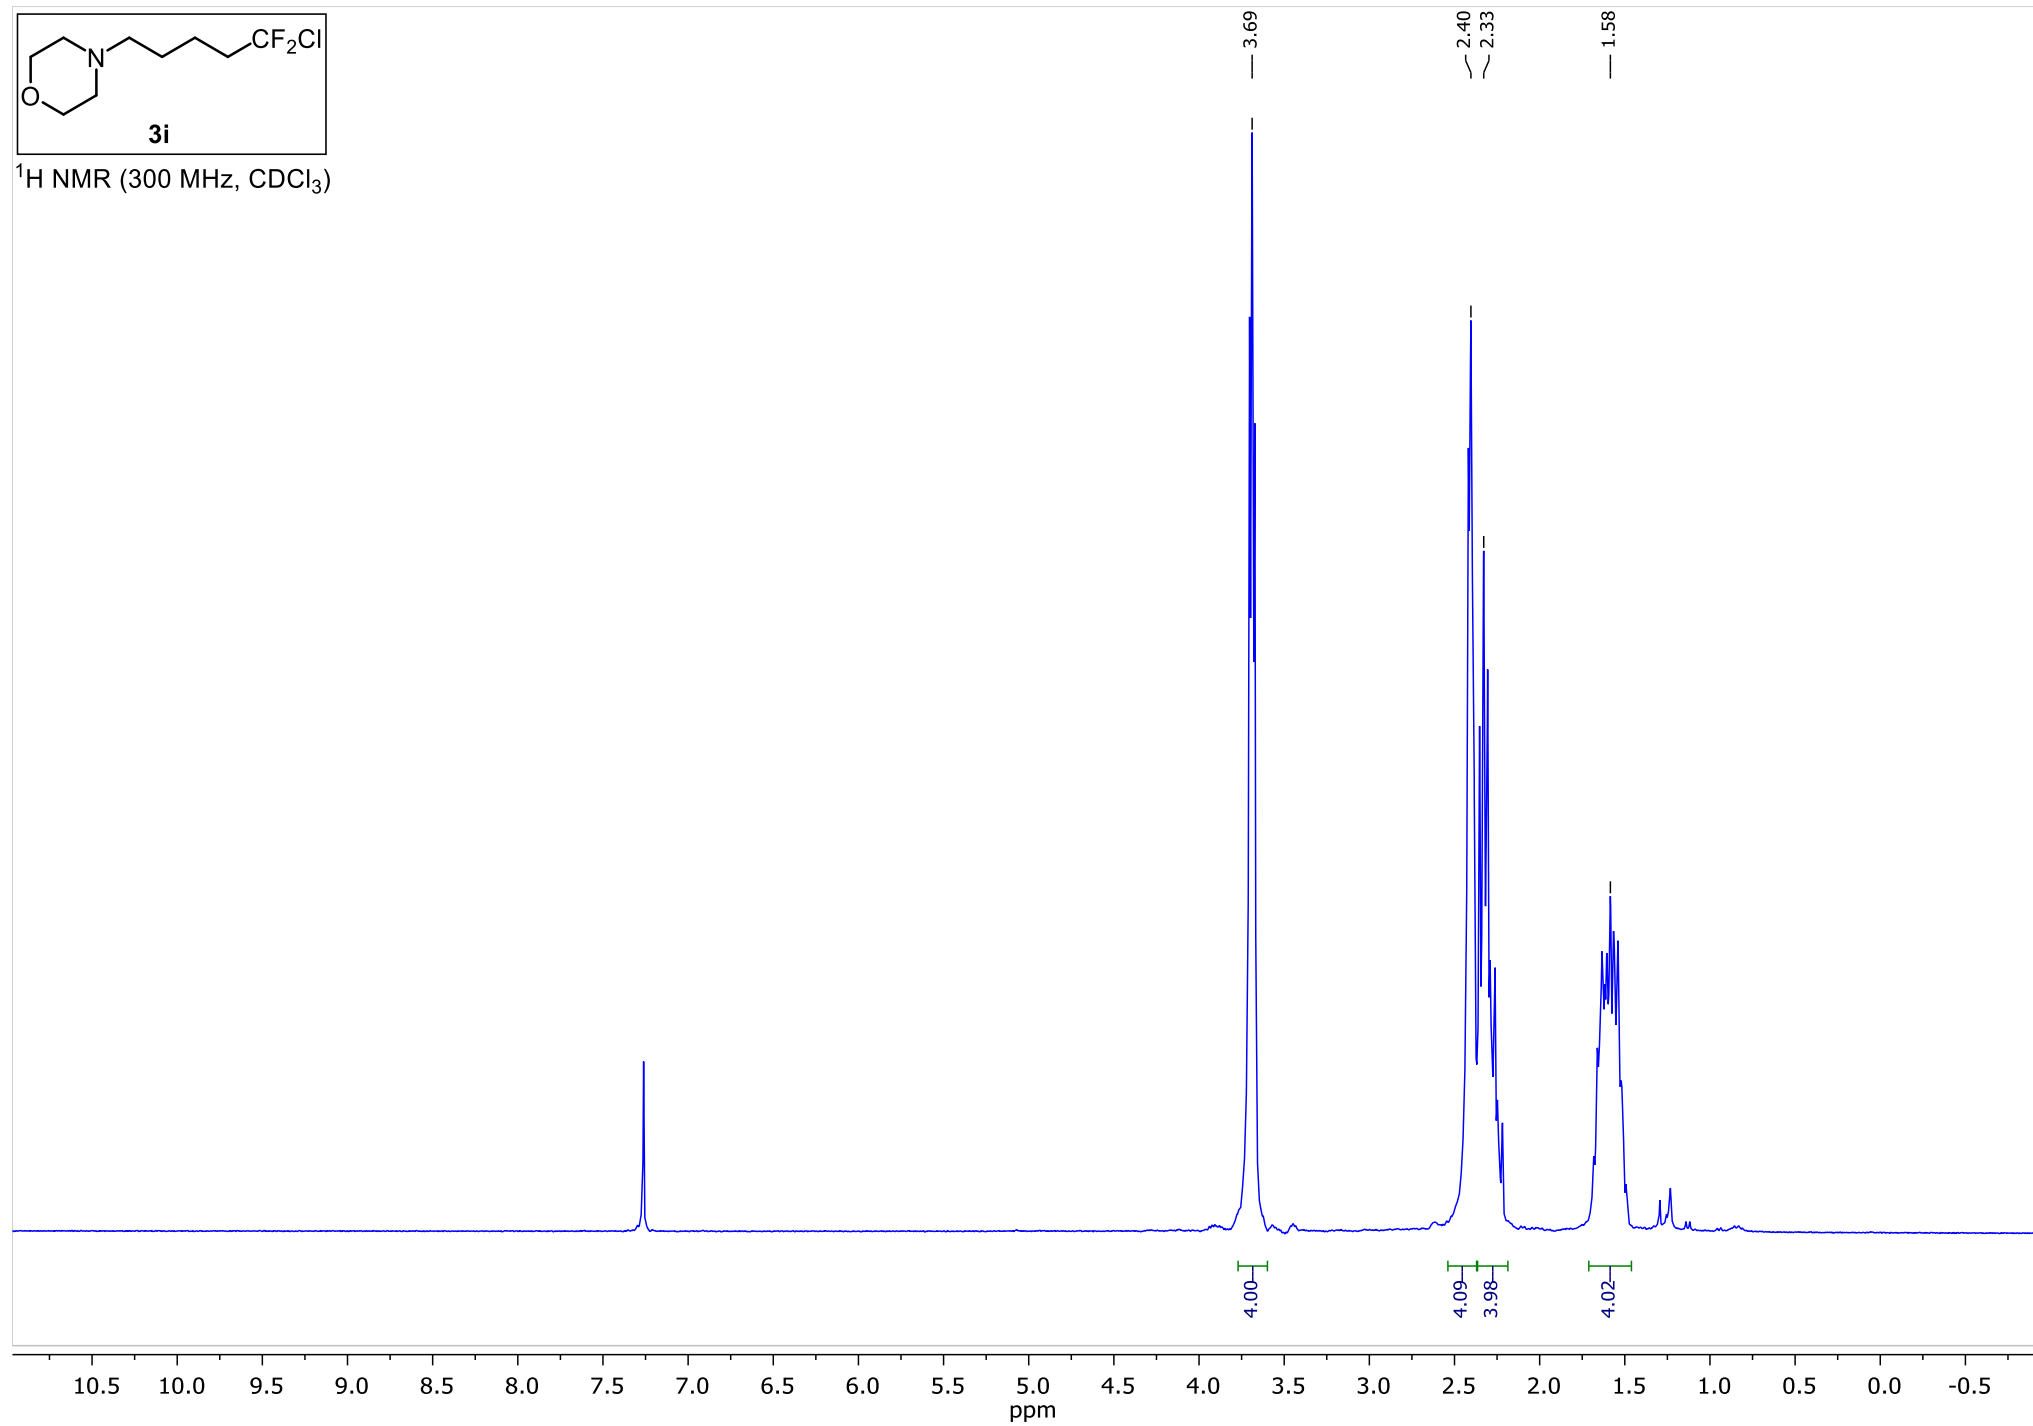

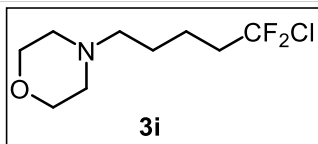

$^{13}\text{C}\{^1\text{H}\}$  NMR (75 MHz,  $\text{CDCl}_3$ )

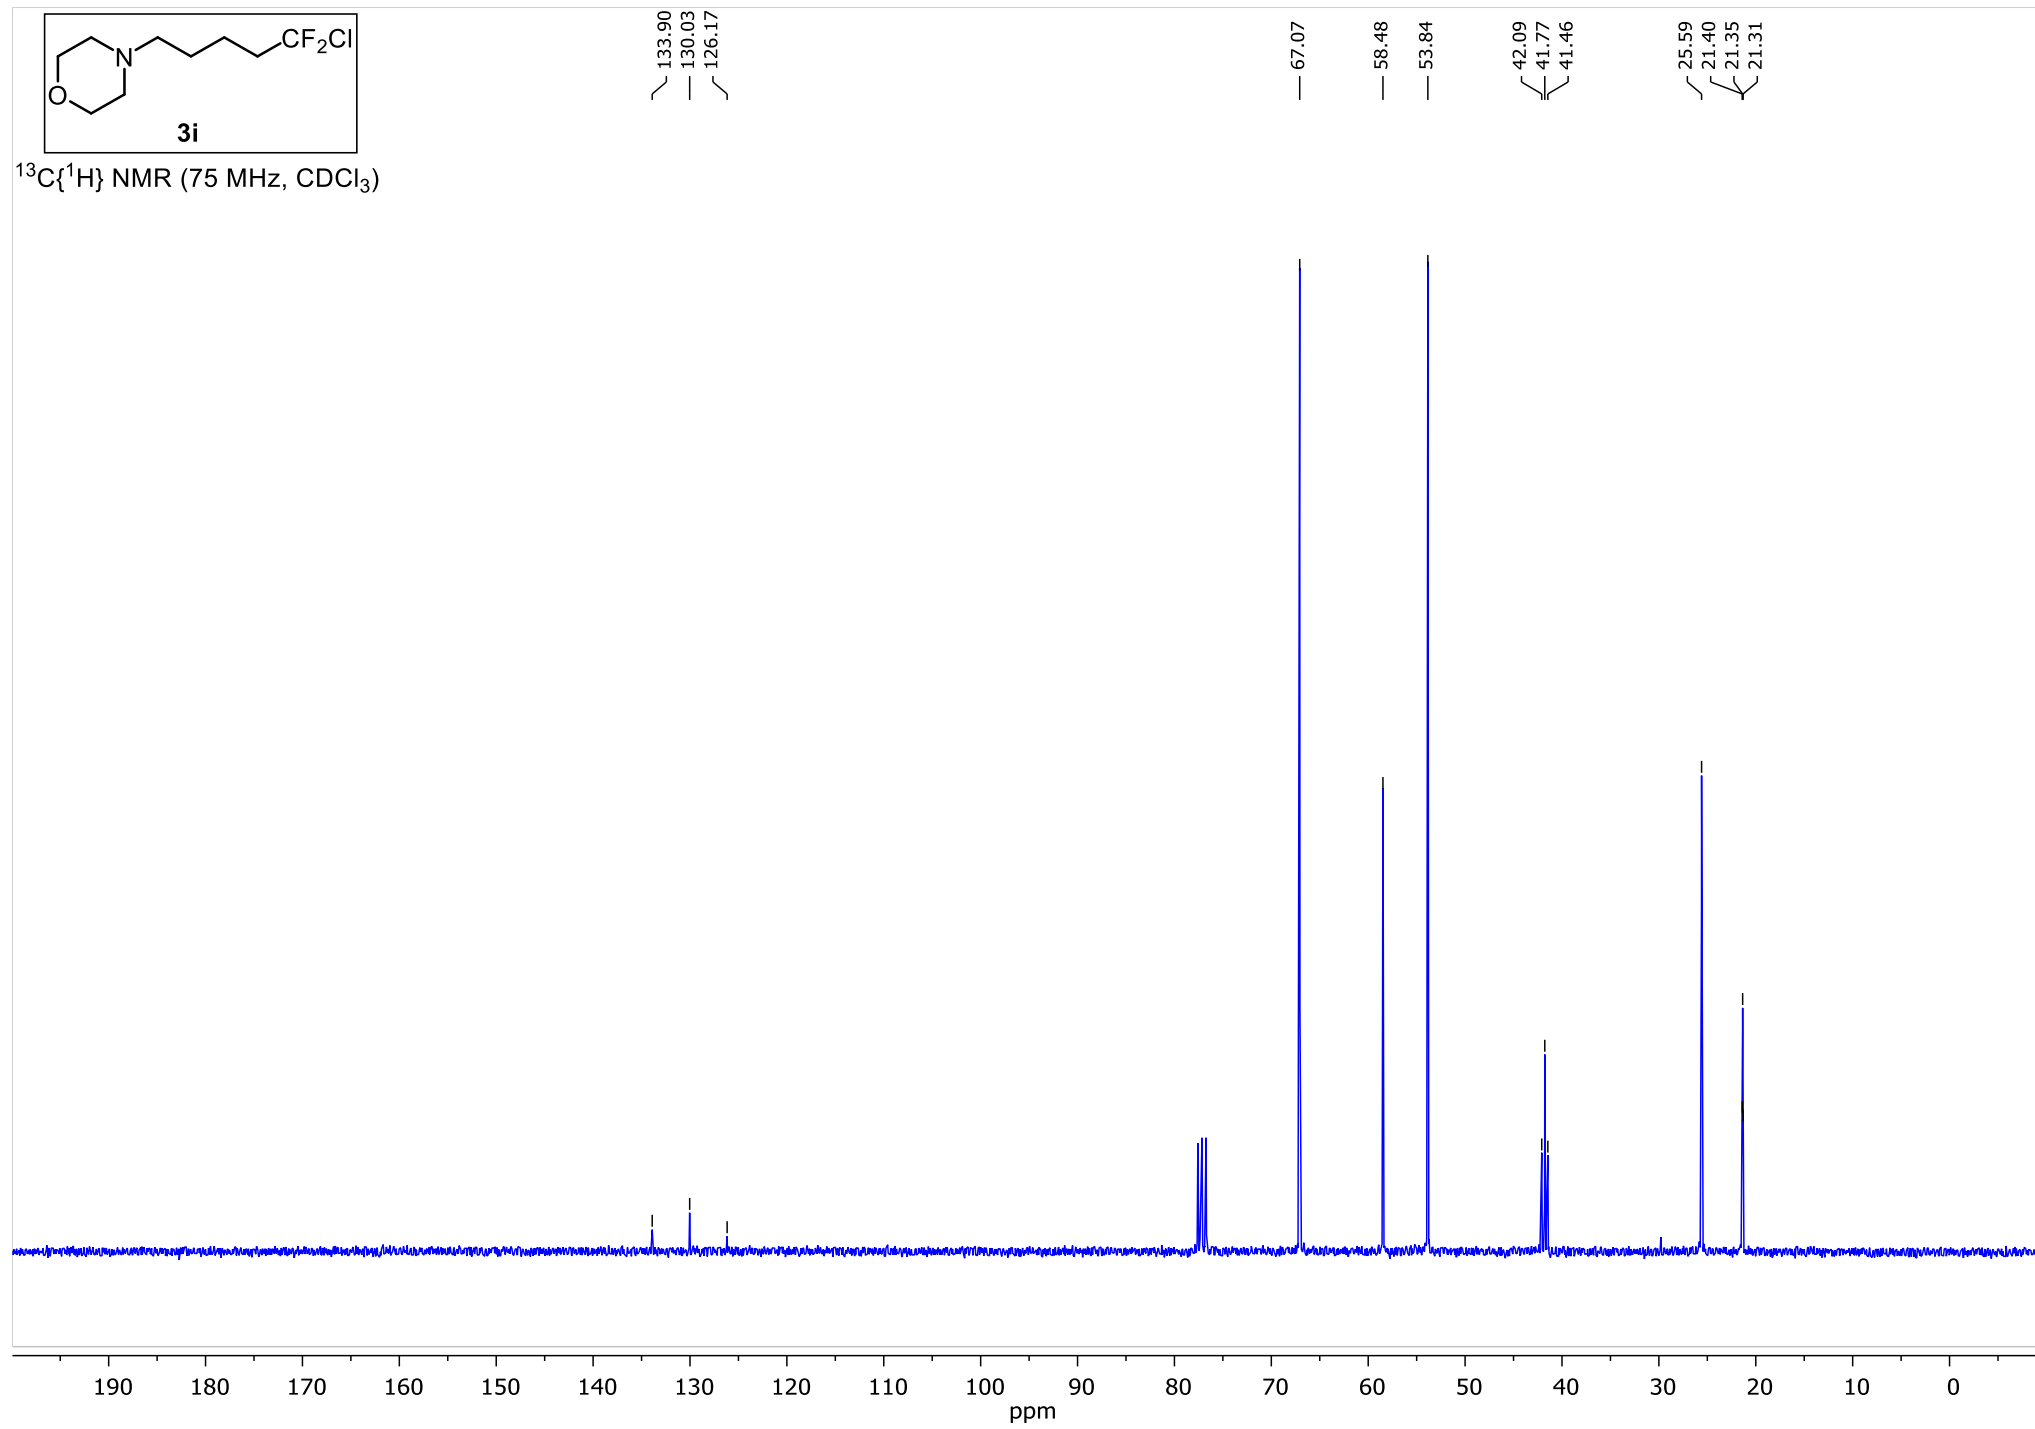

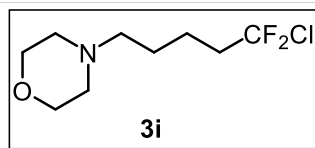

$^{19}\text{F}$  NMR (282 MHz,  $\text{CDCl}_3$ )

-51.35  
-51.40  
-51.44

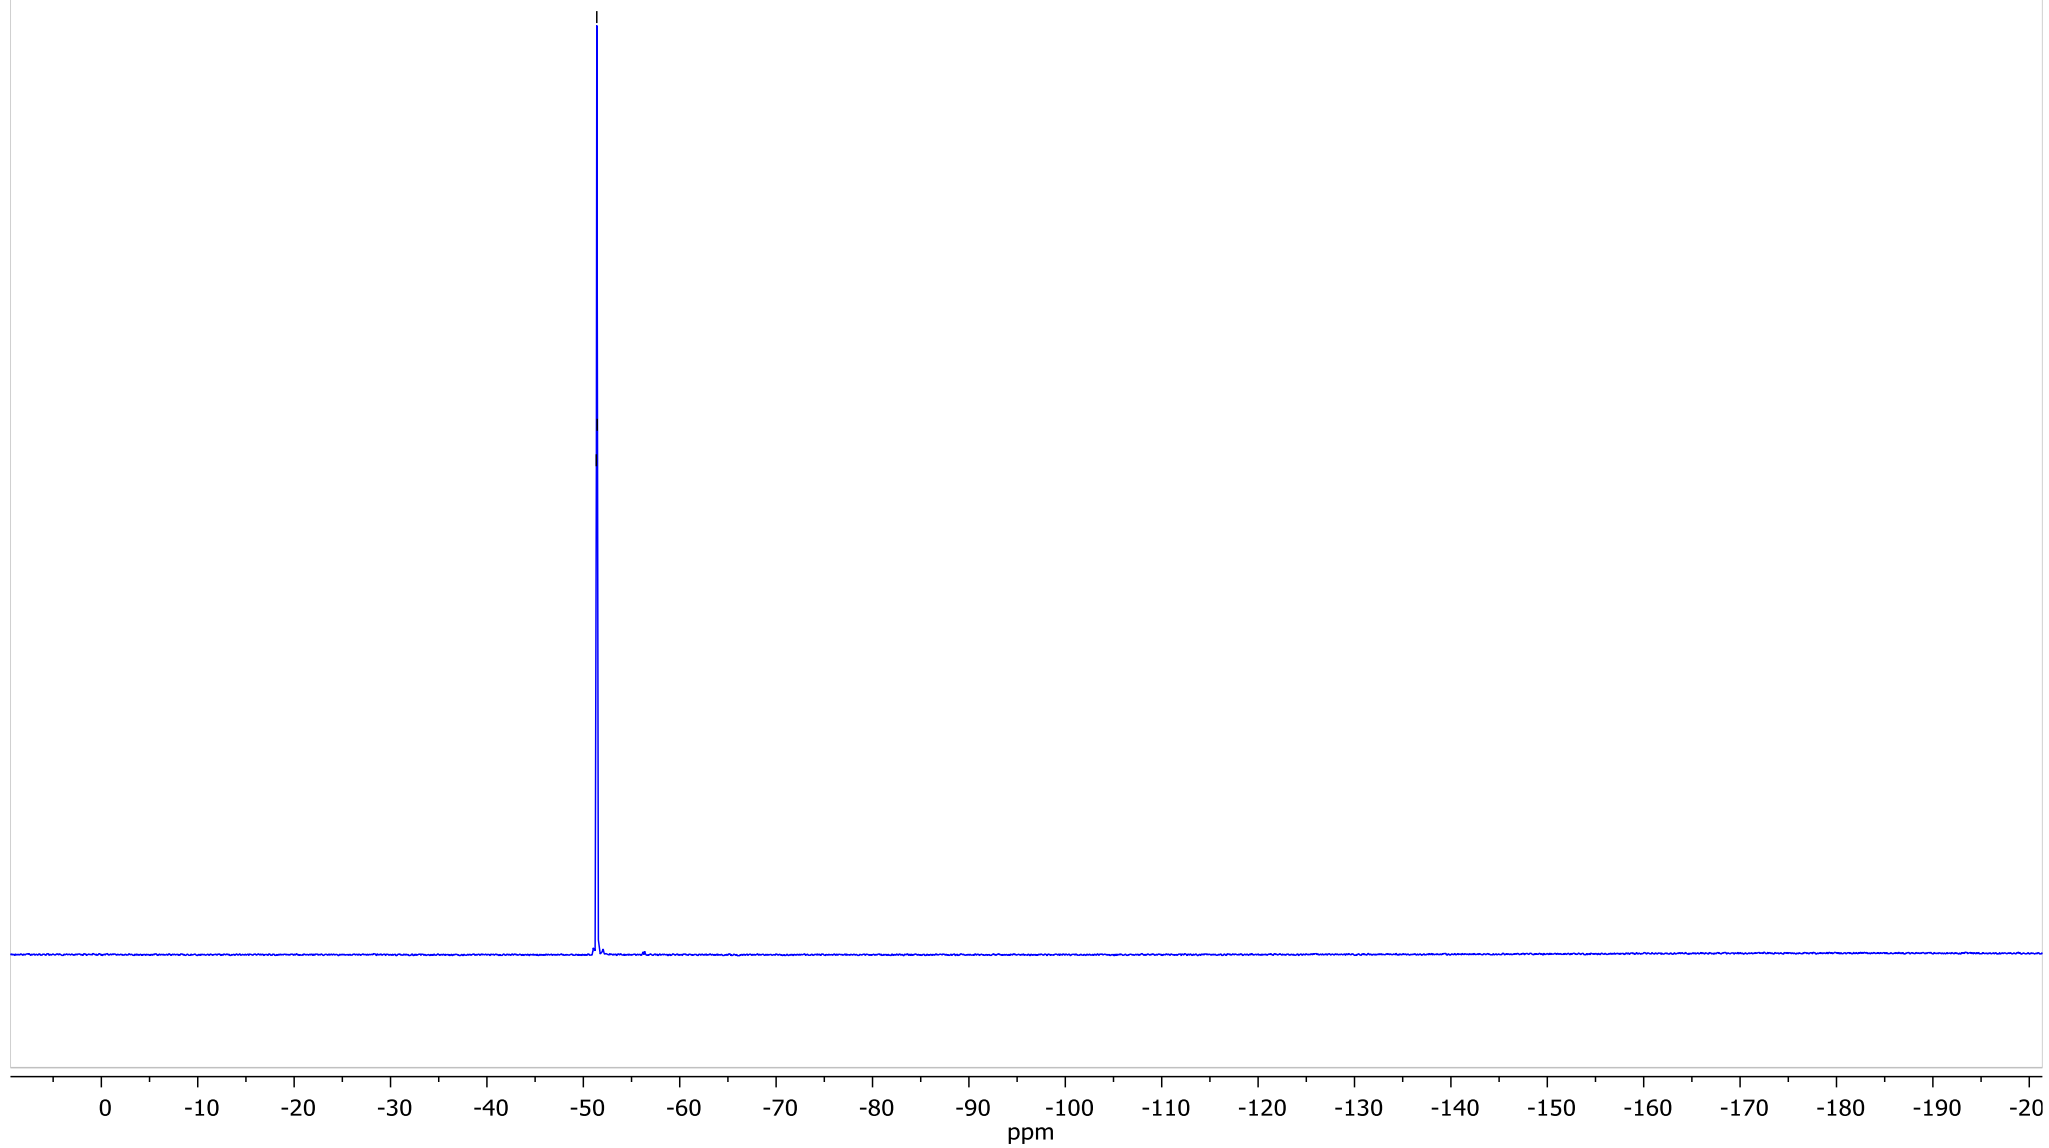

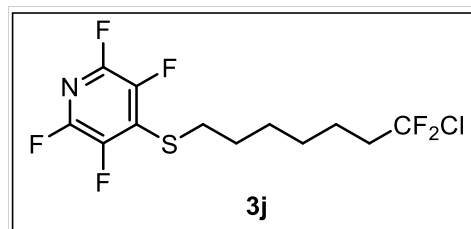

$^1\text{H}$  NMR (300 MHz,  $\text{CDCl}_3$ )

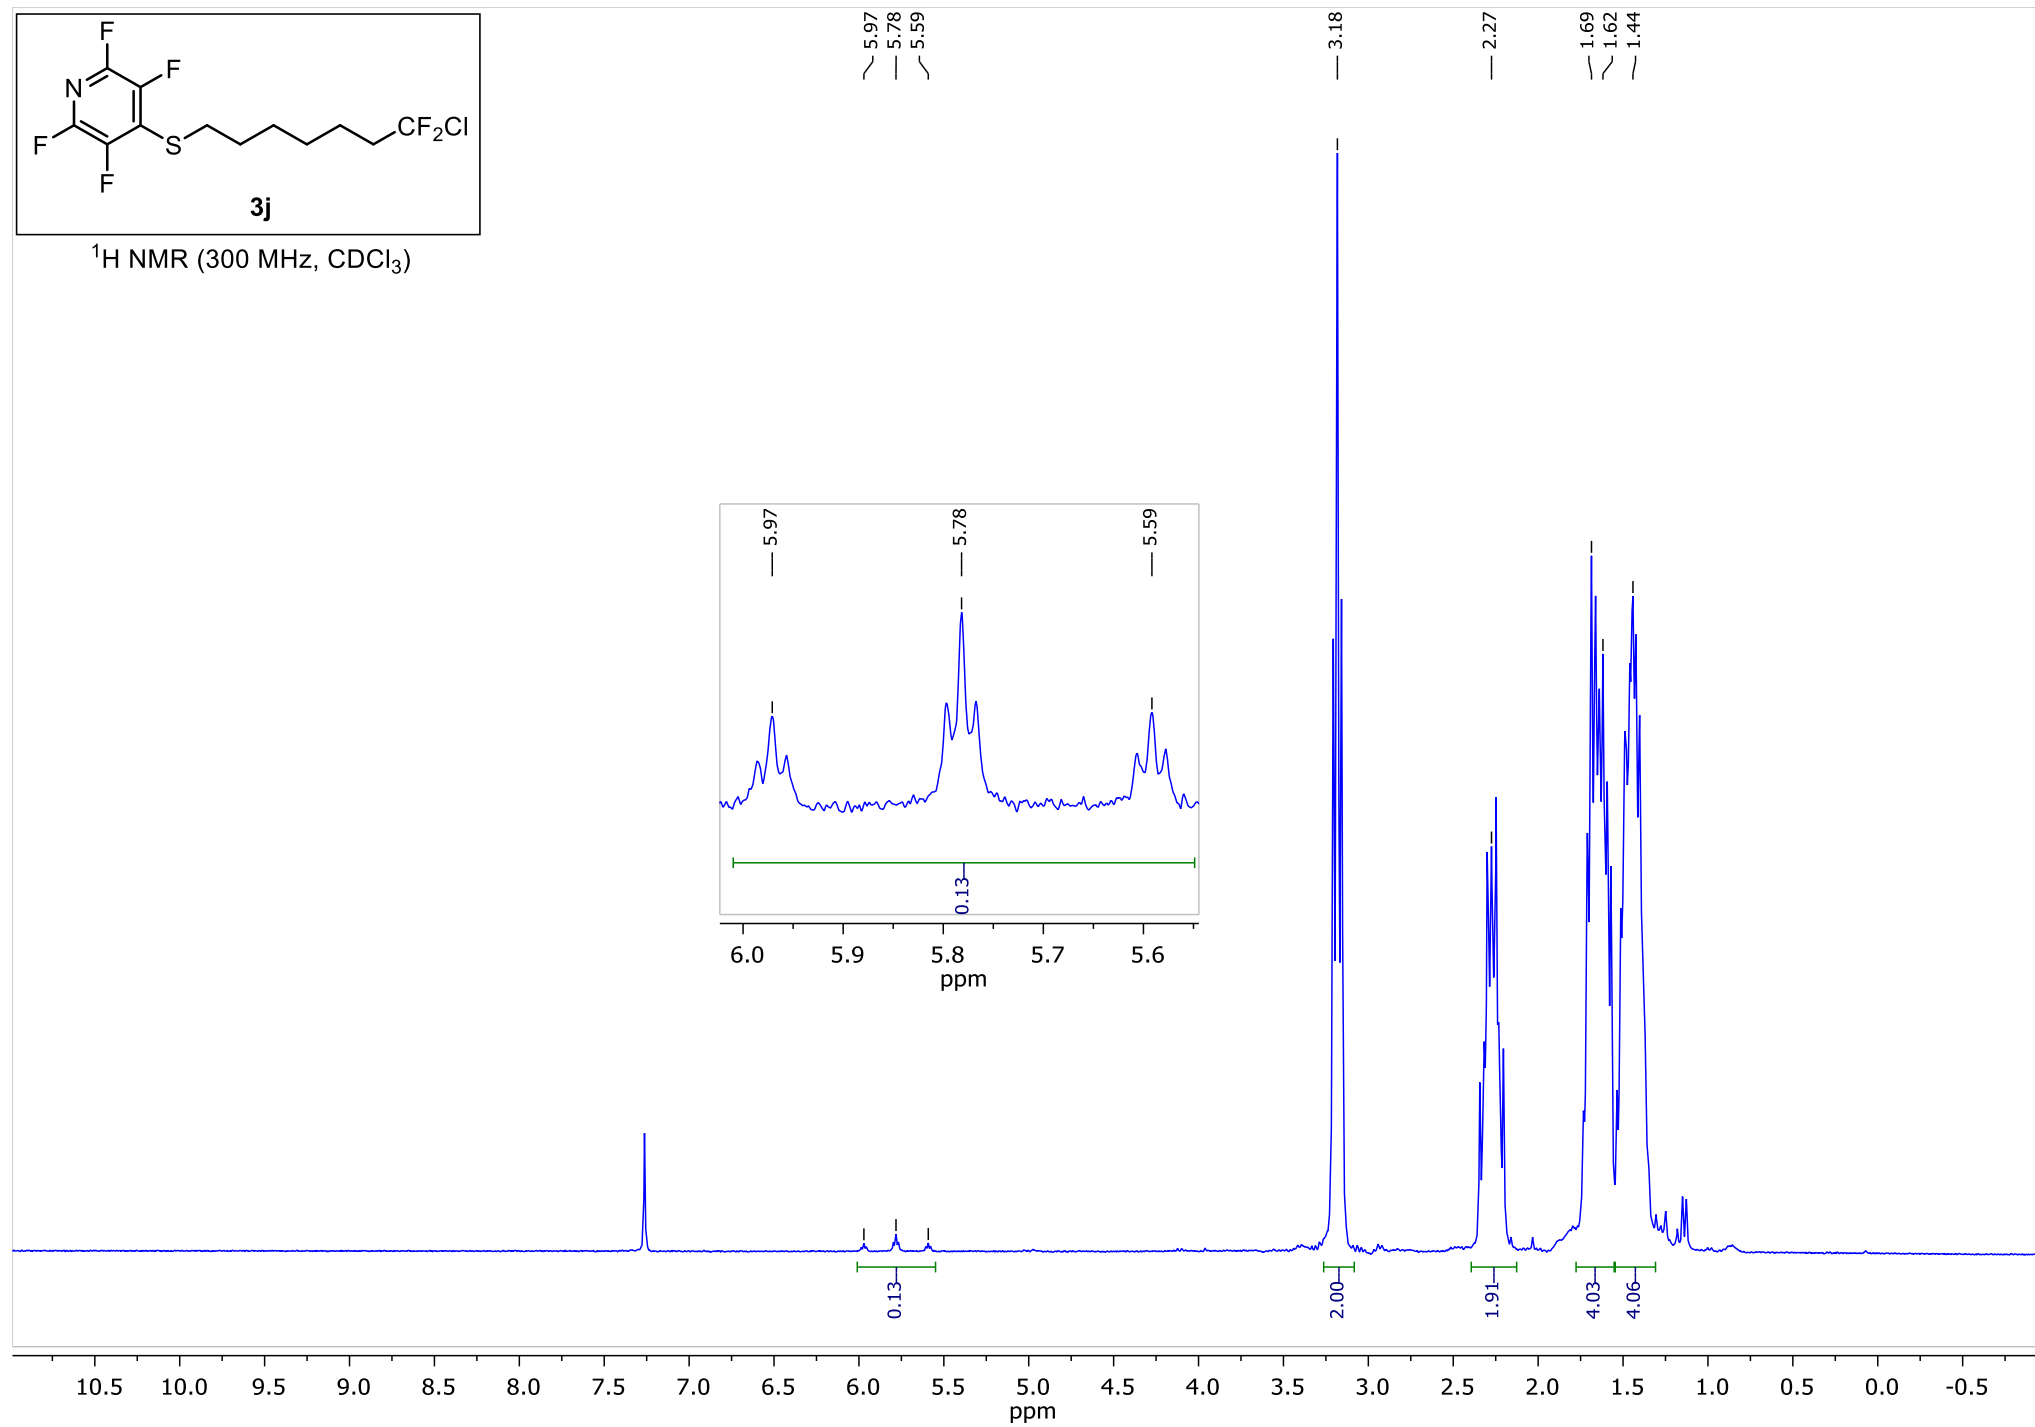

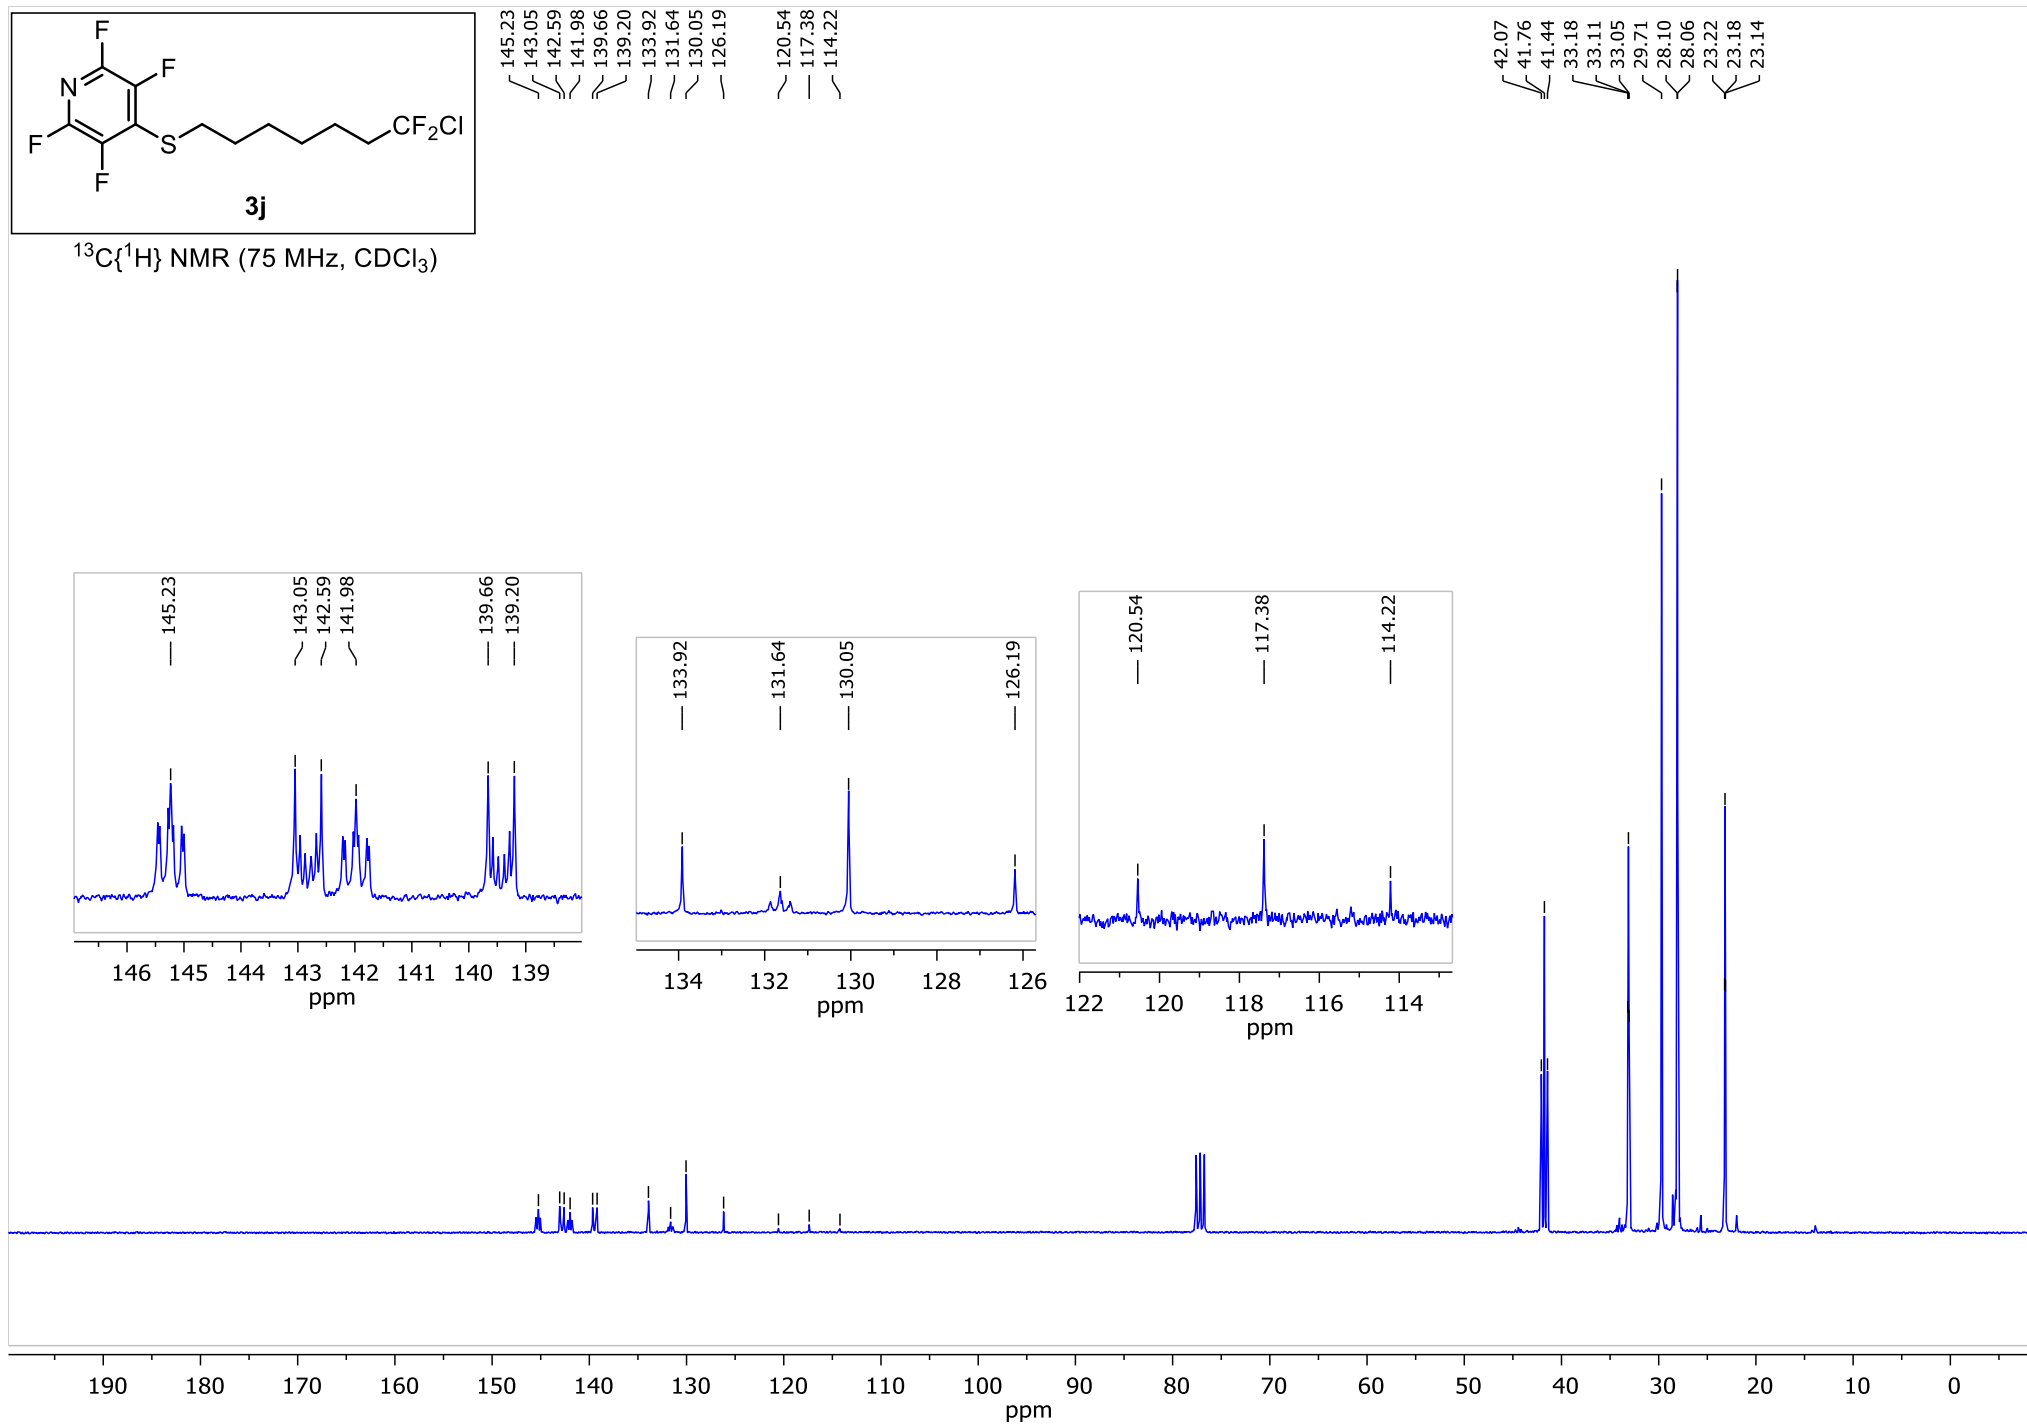

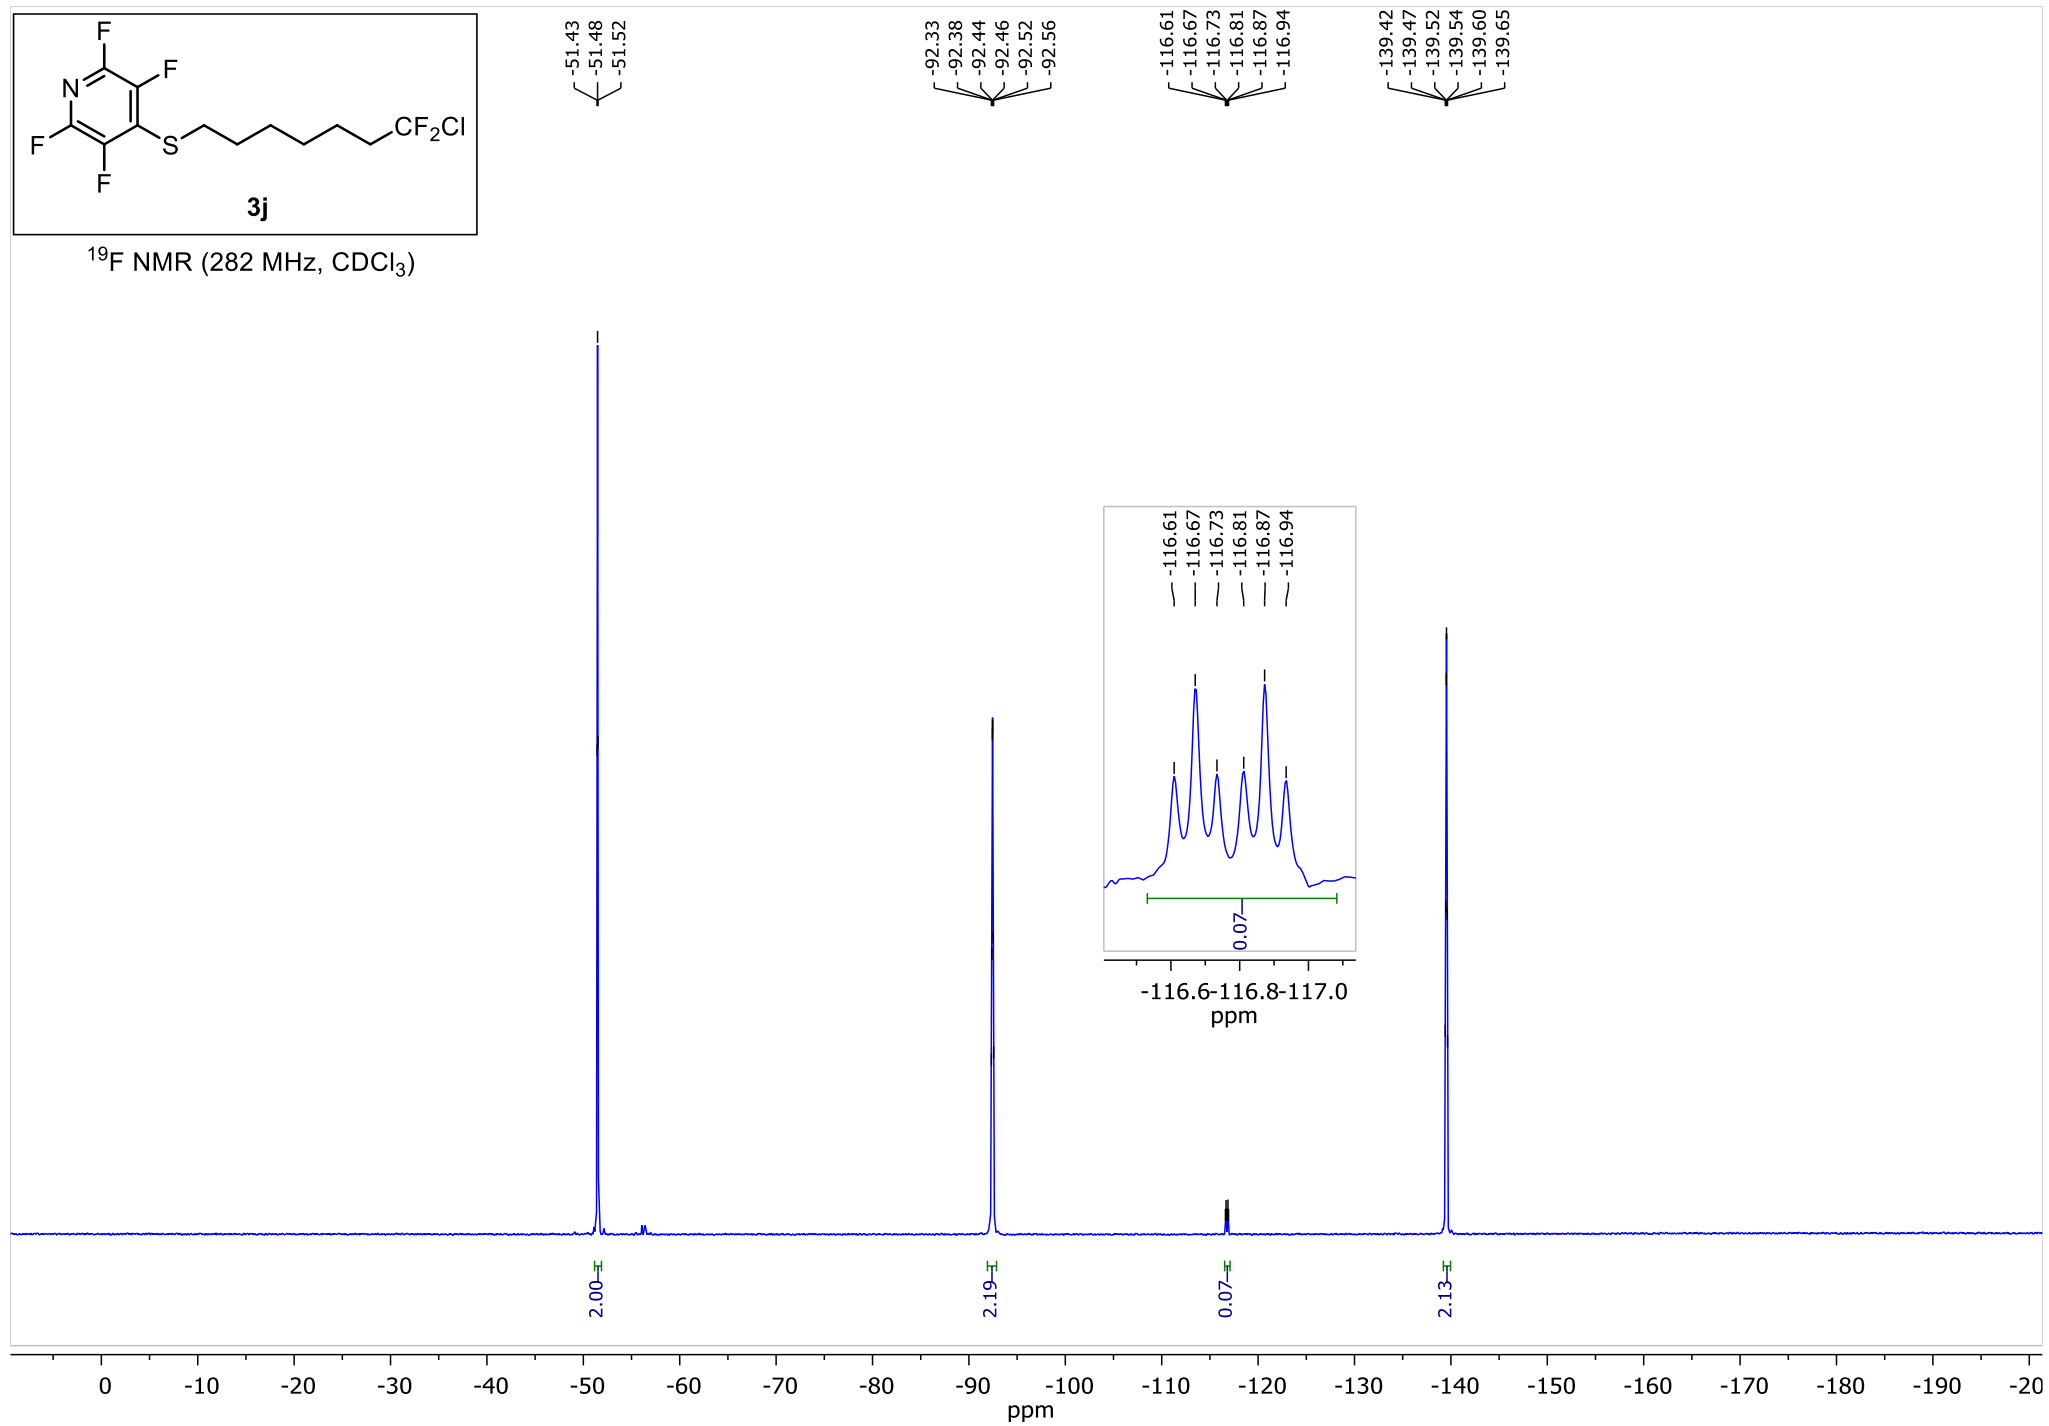

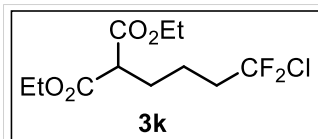

<sup>1</sup>H NMR (300 MHz, CDCl<sub>3</sub>)

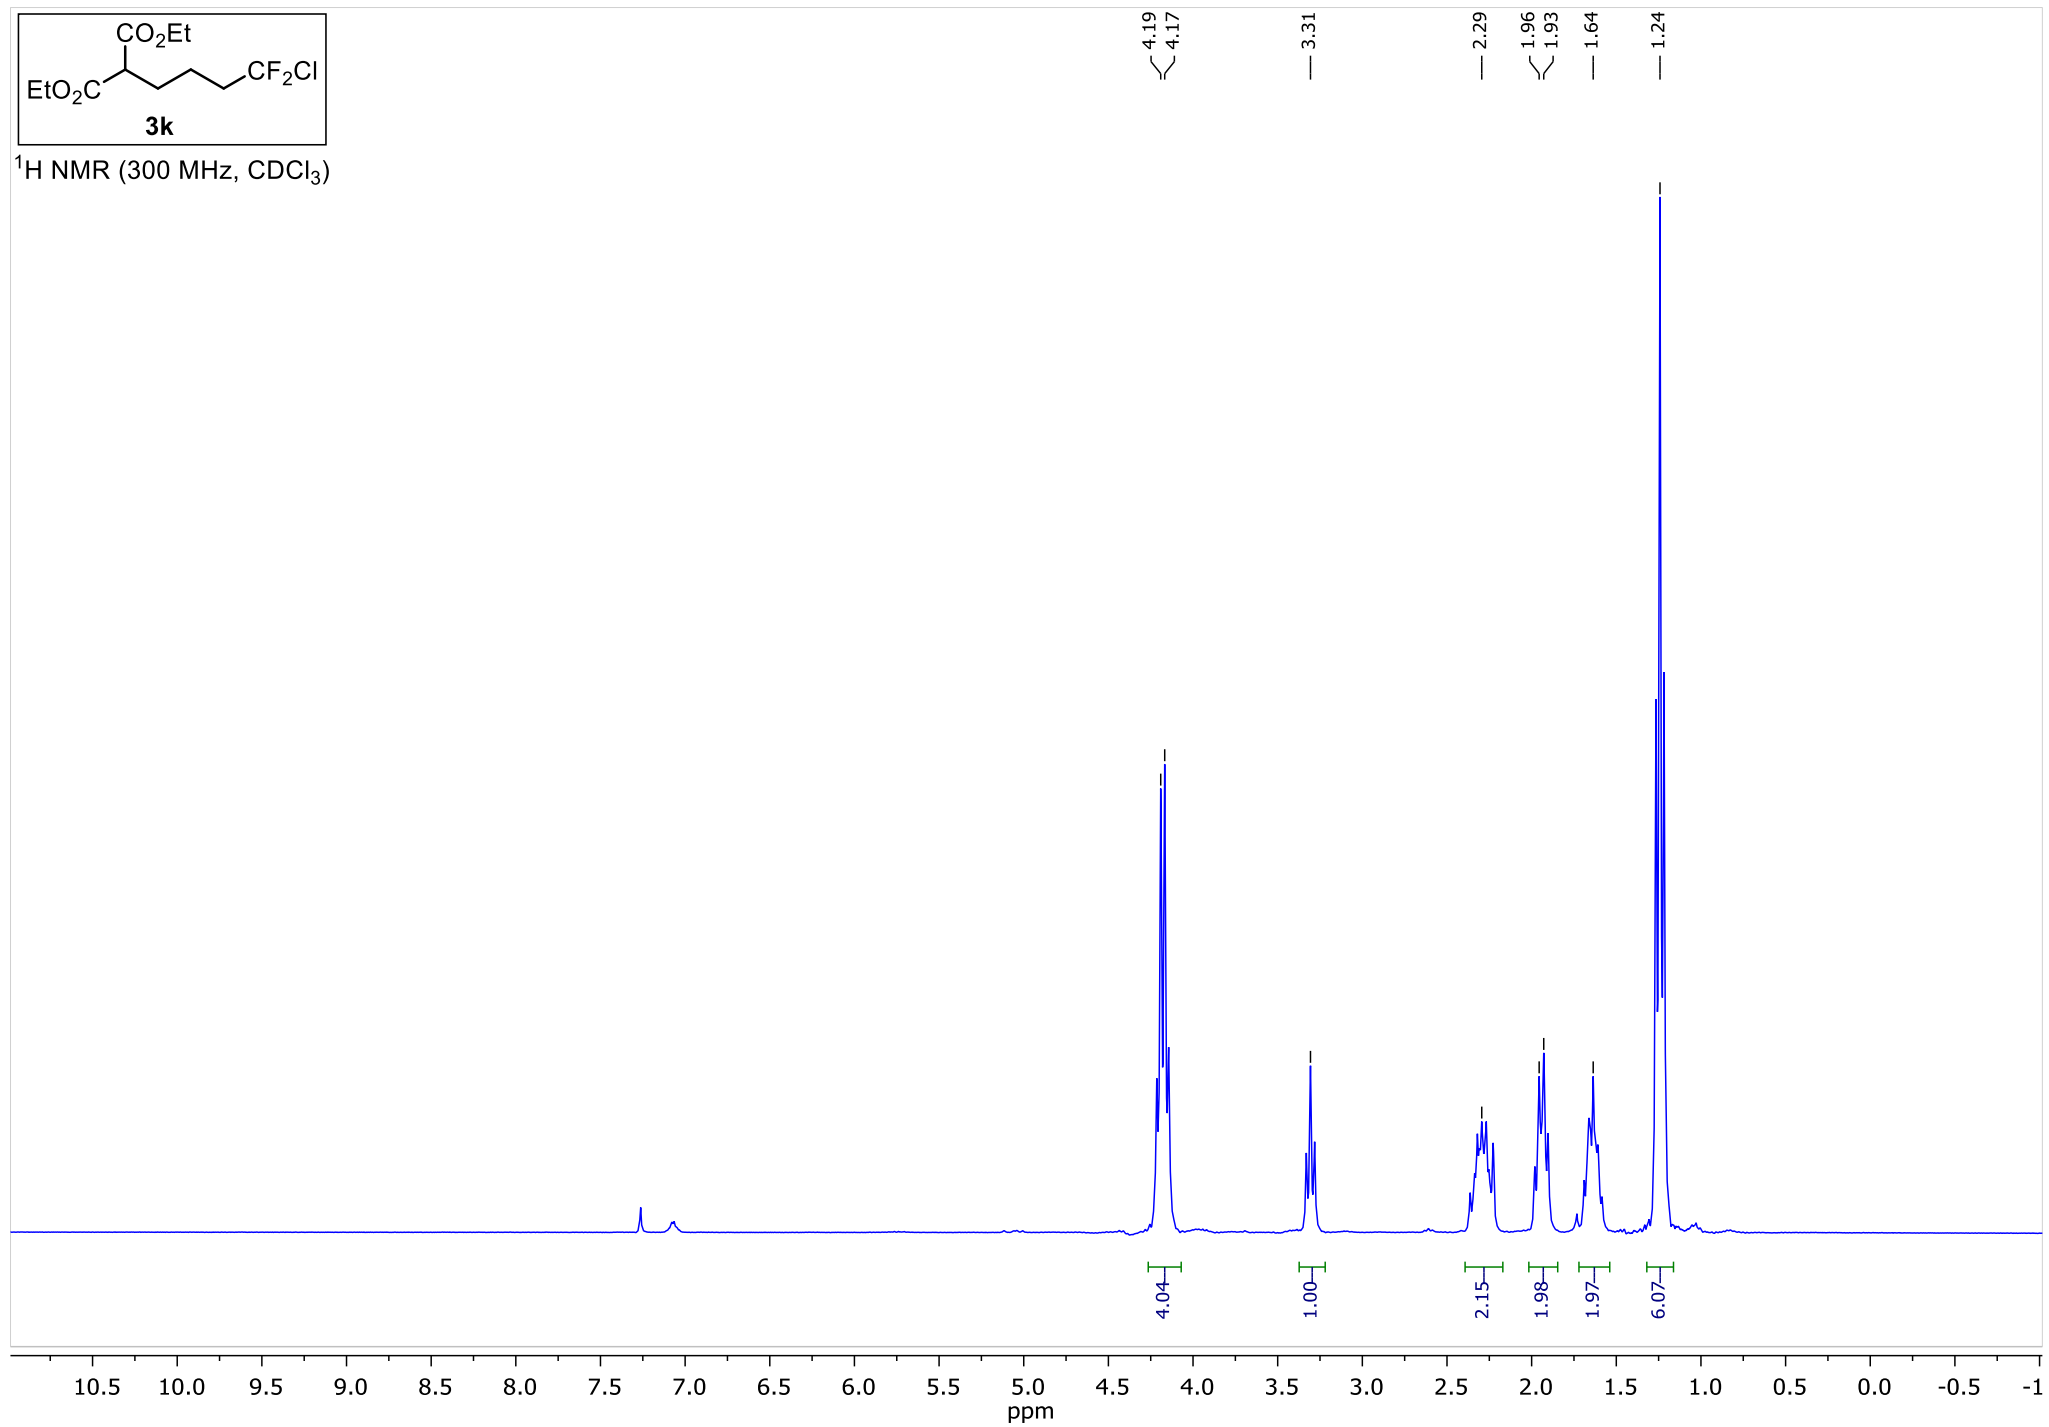



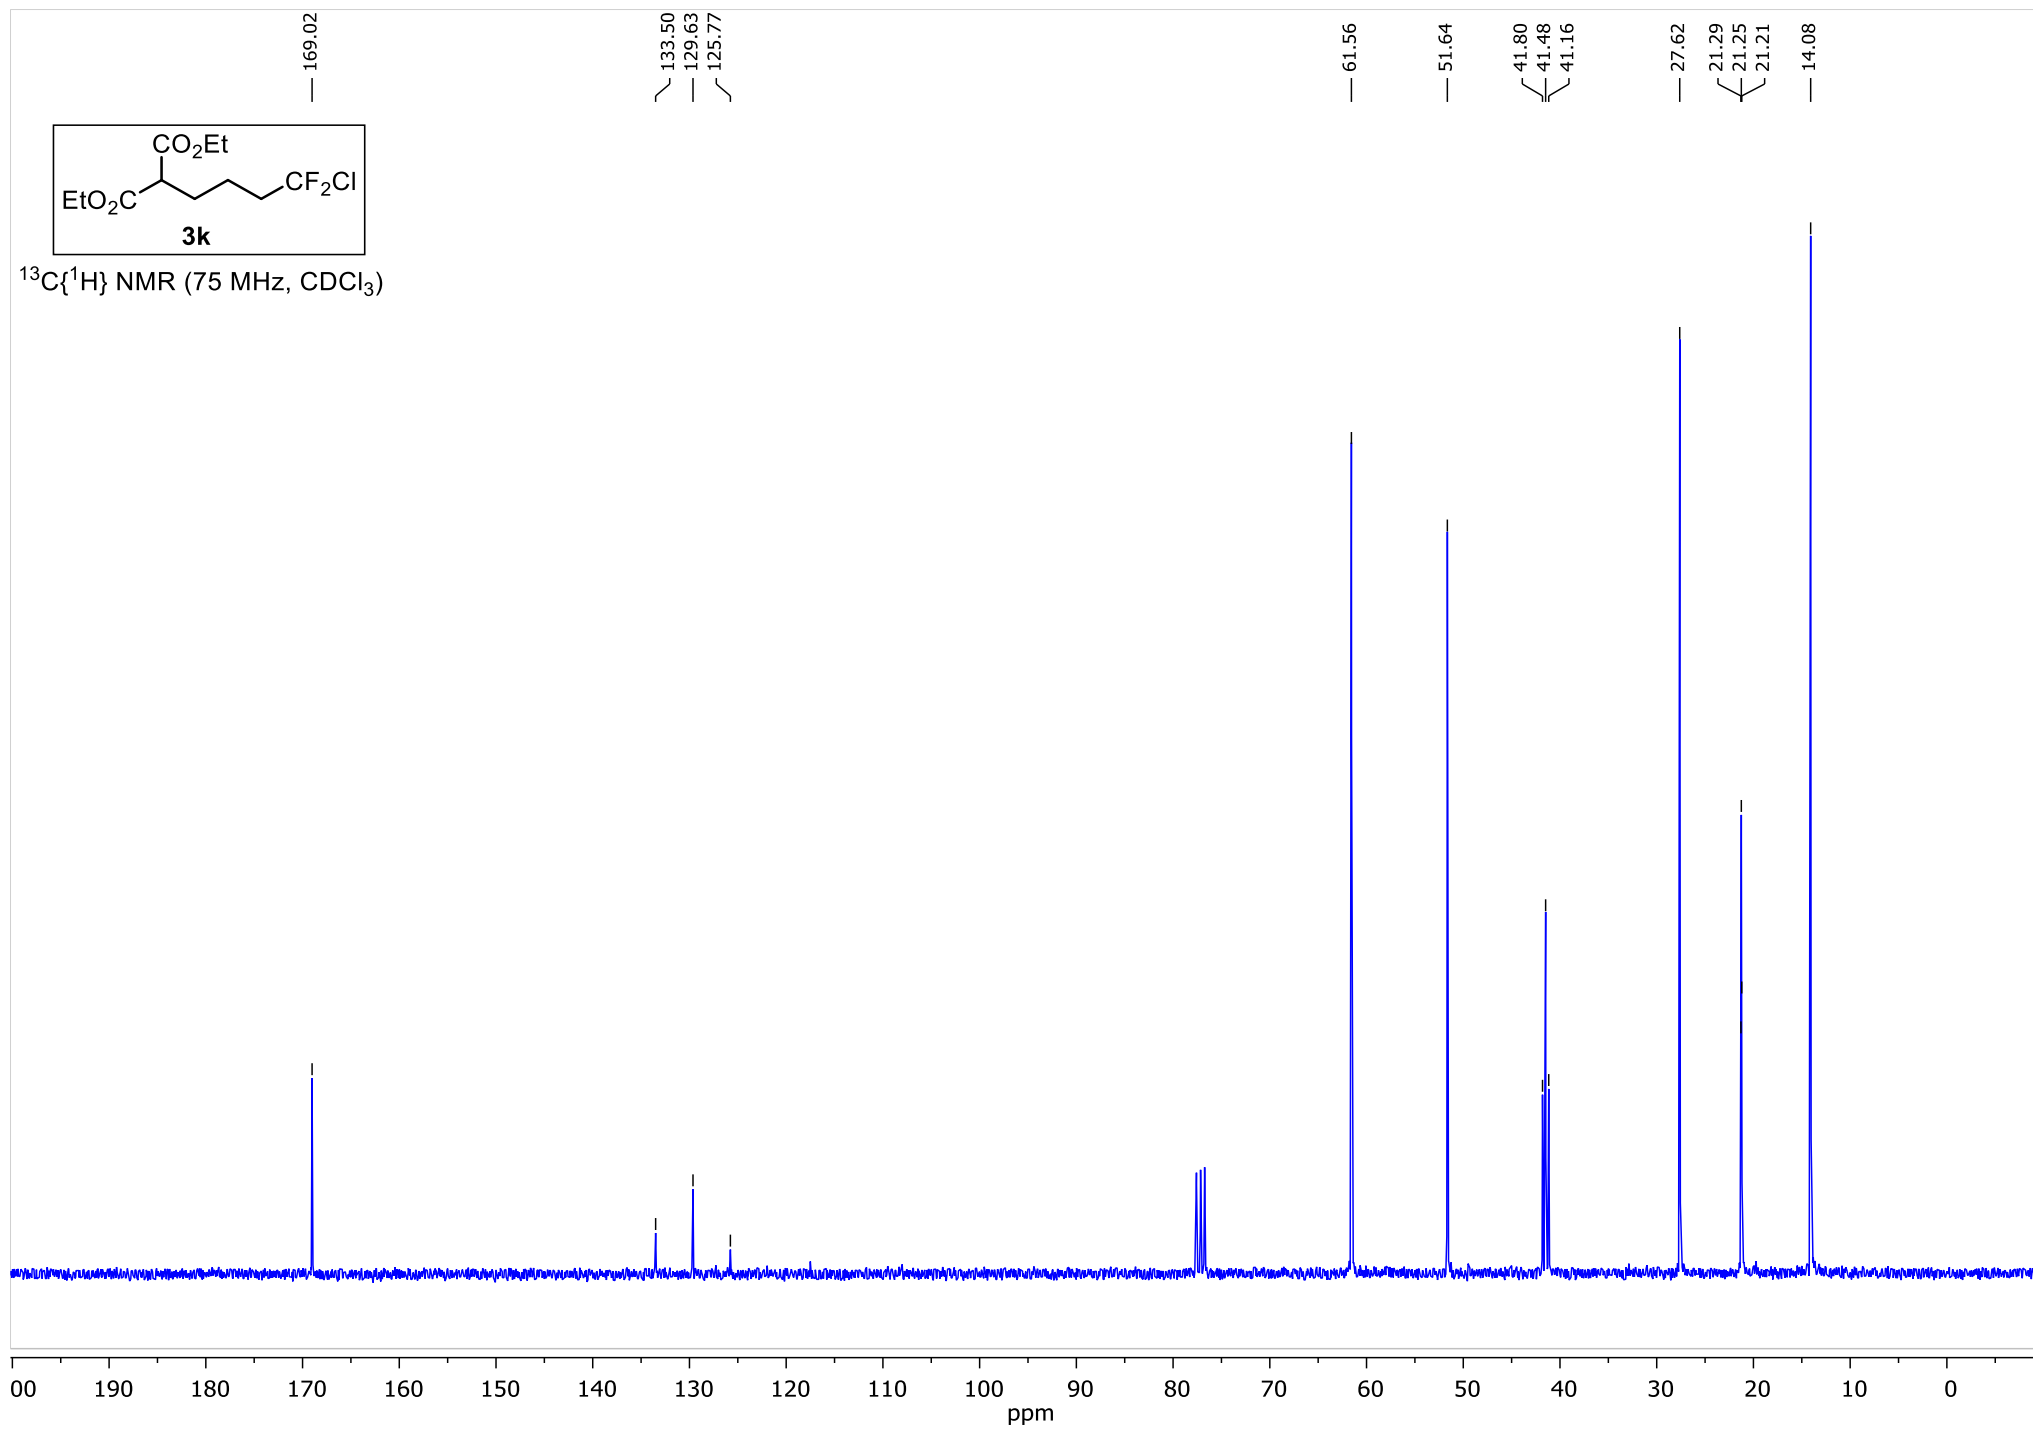

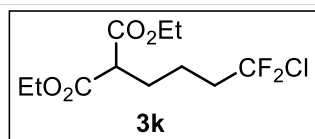

<sup>19</sup>F NMR (282 MHz, CDCl<sub>3</sub>)

-51.55  
-51.60  
-51.64

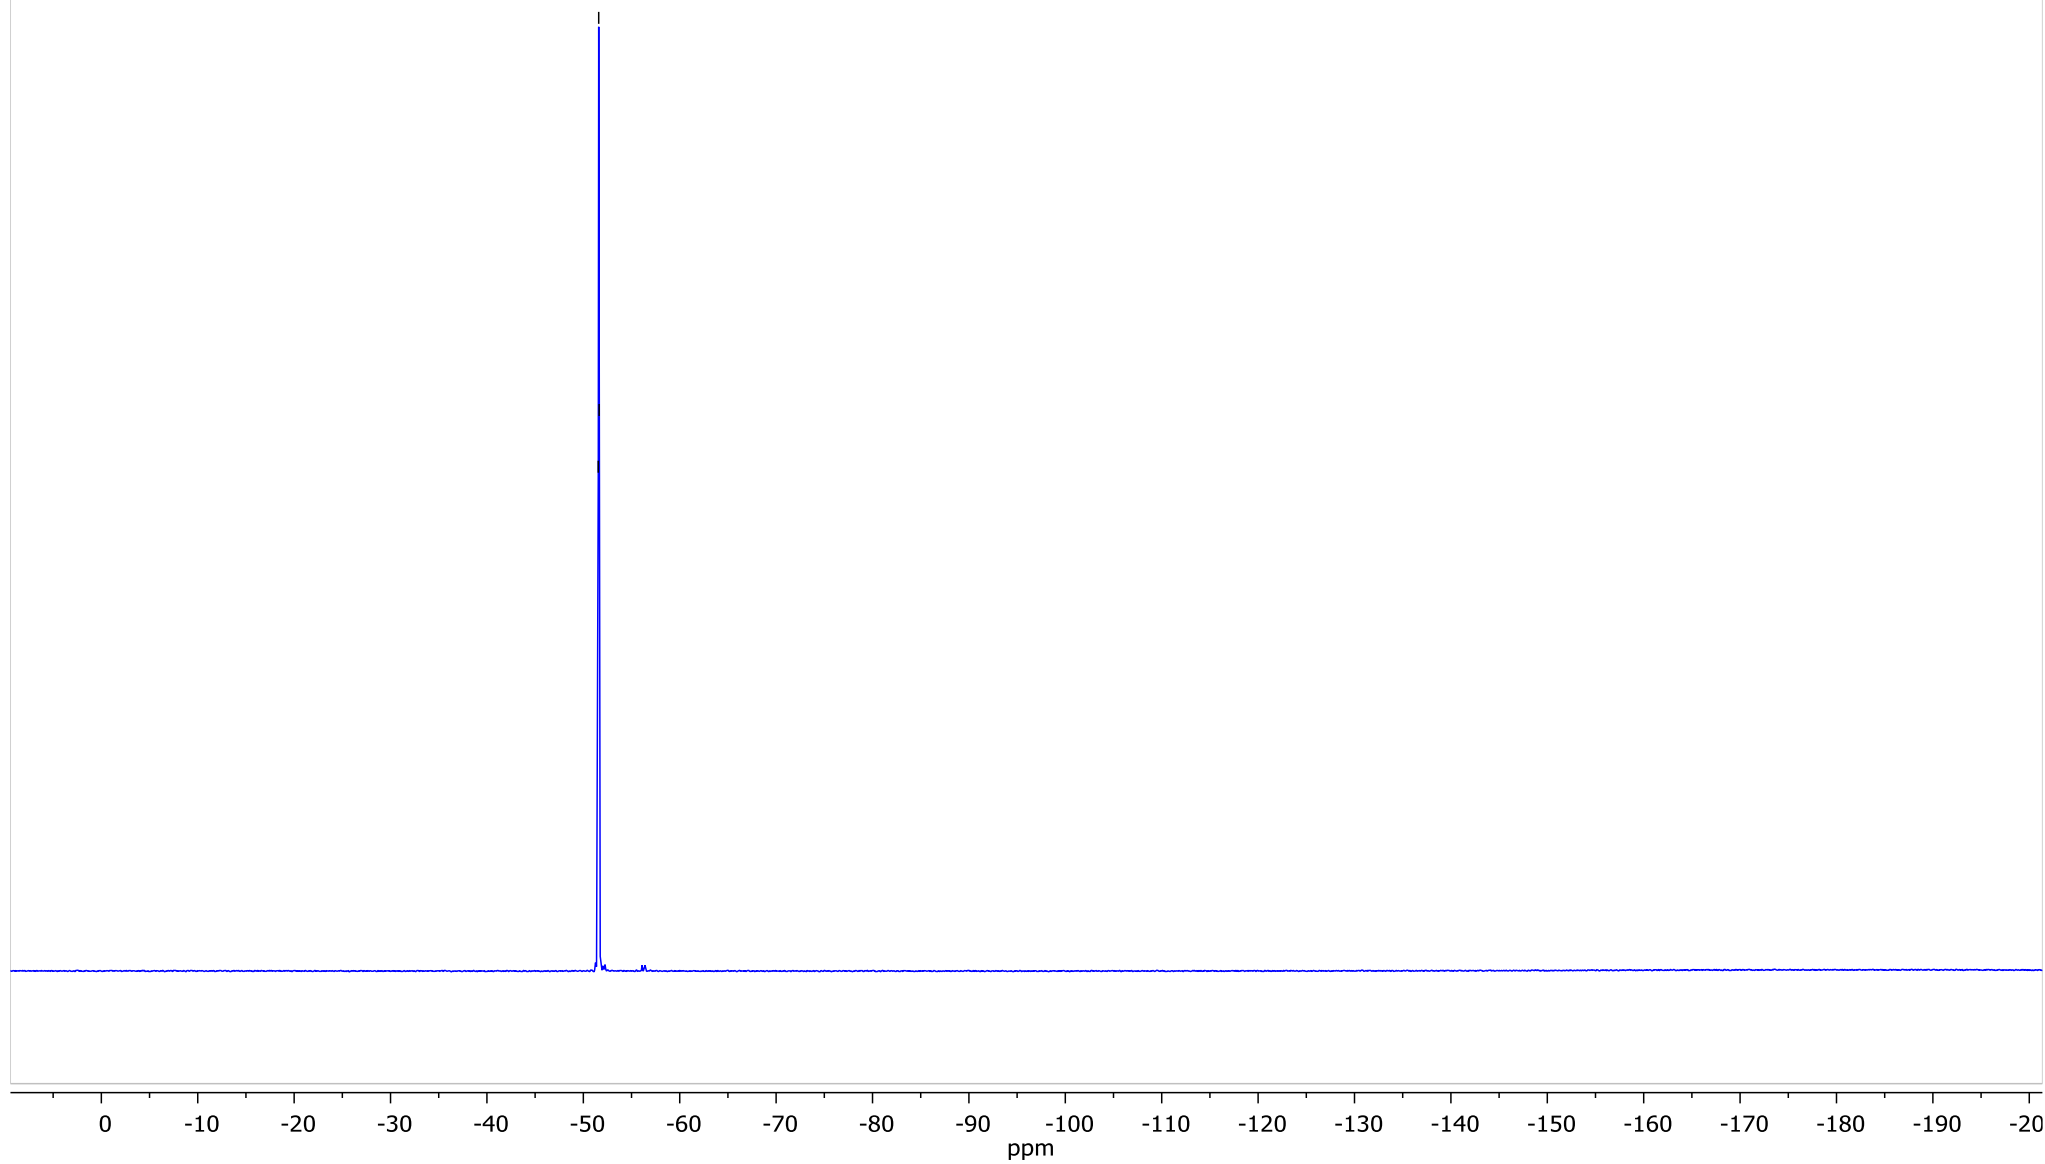

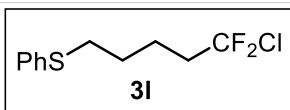

$^1\text{H NMR}$  (300 MHz,  $\text{CDCl}_3$ )

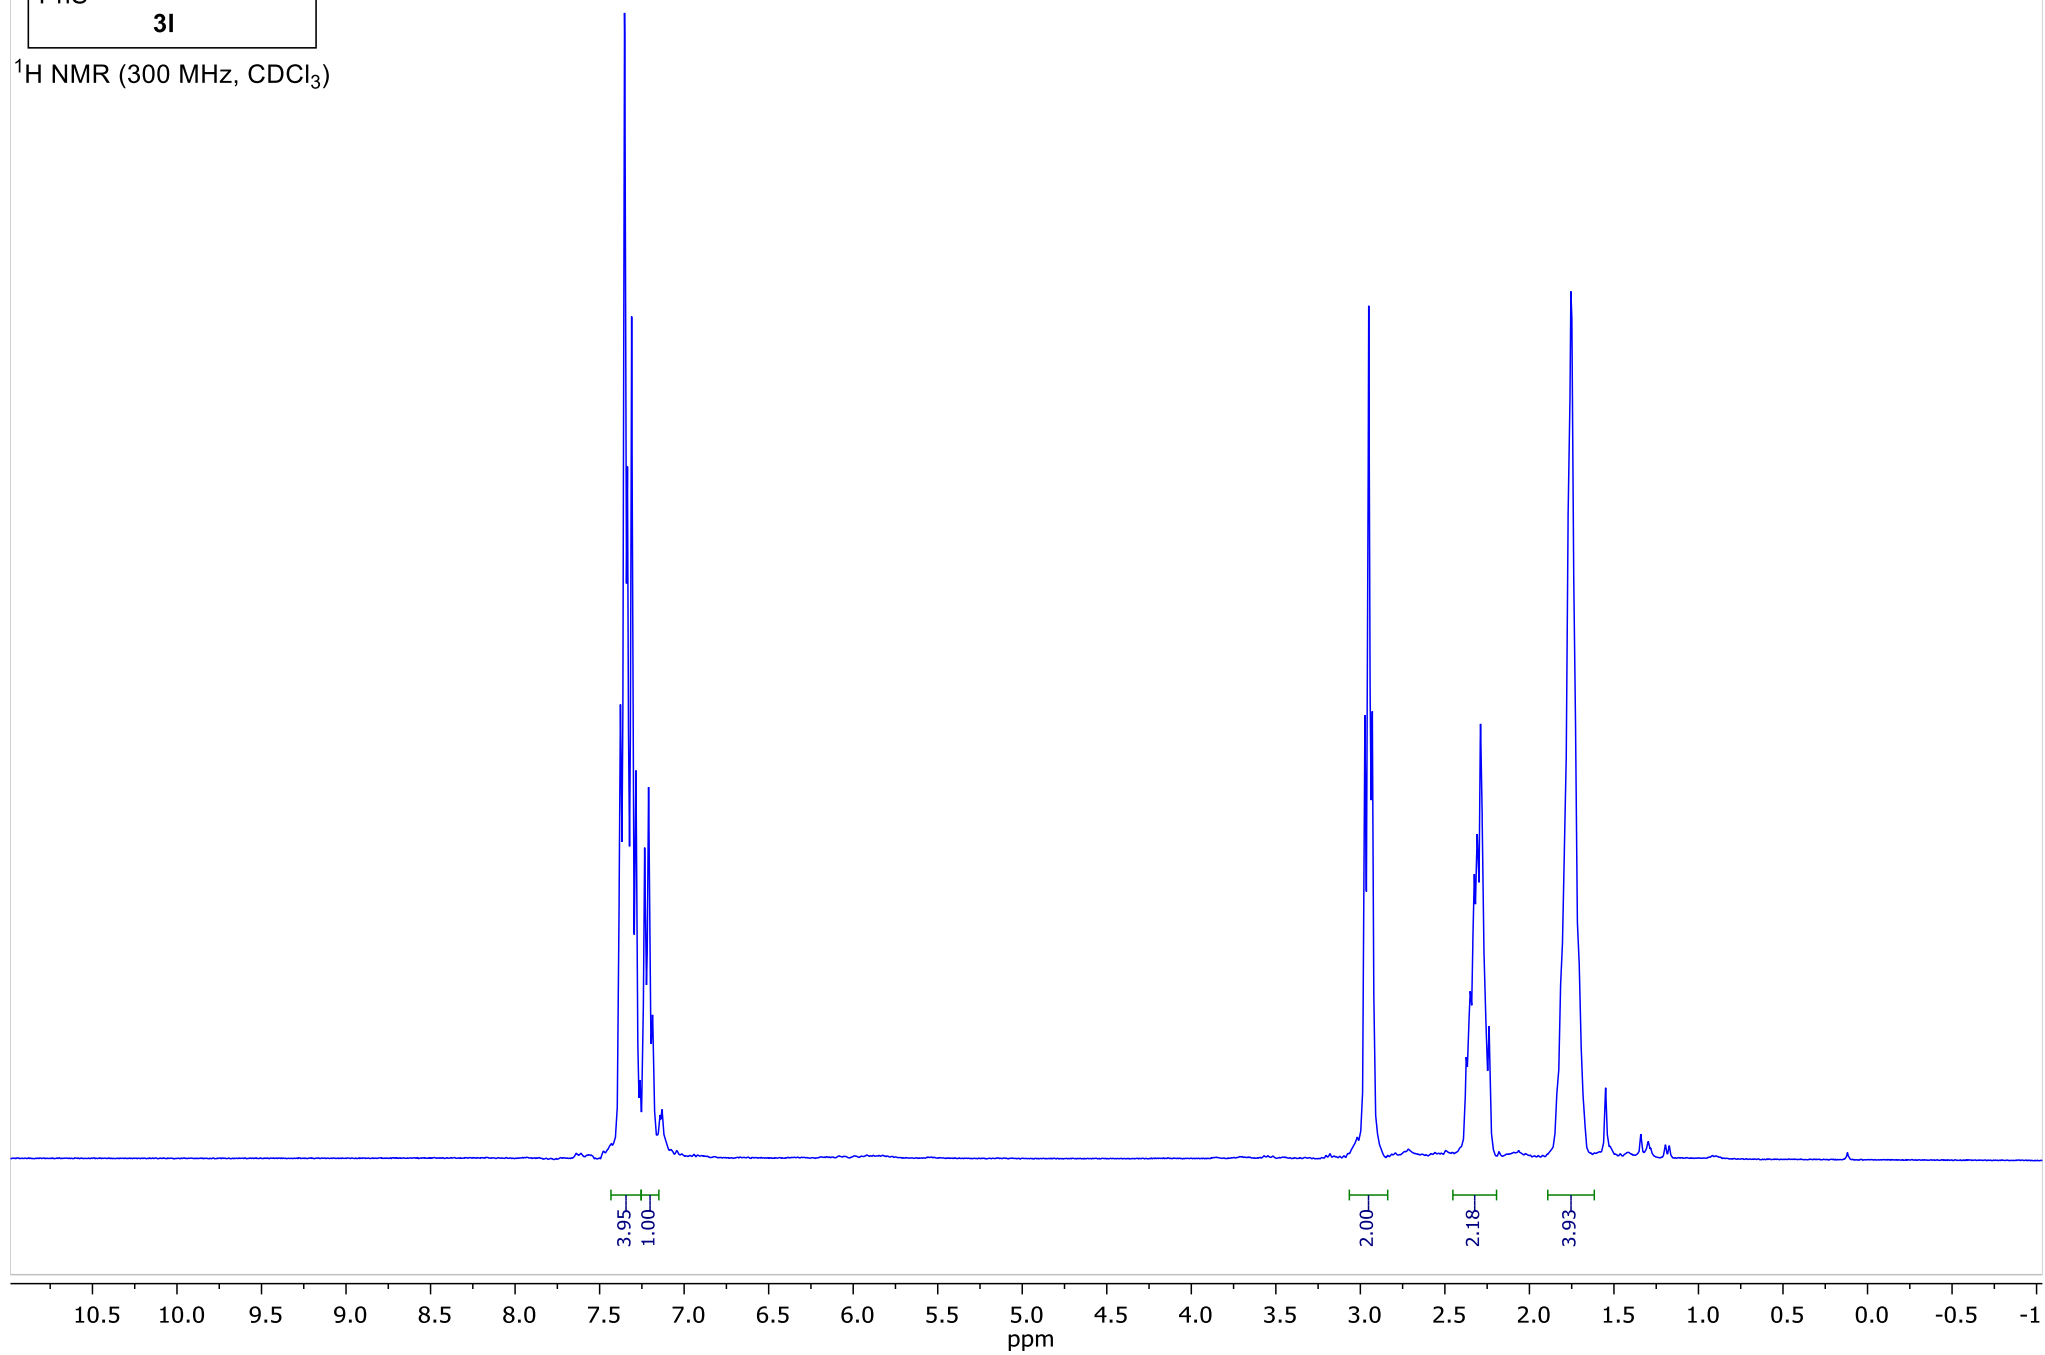

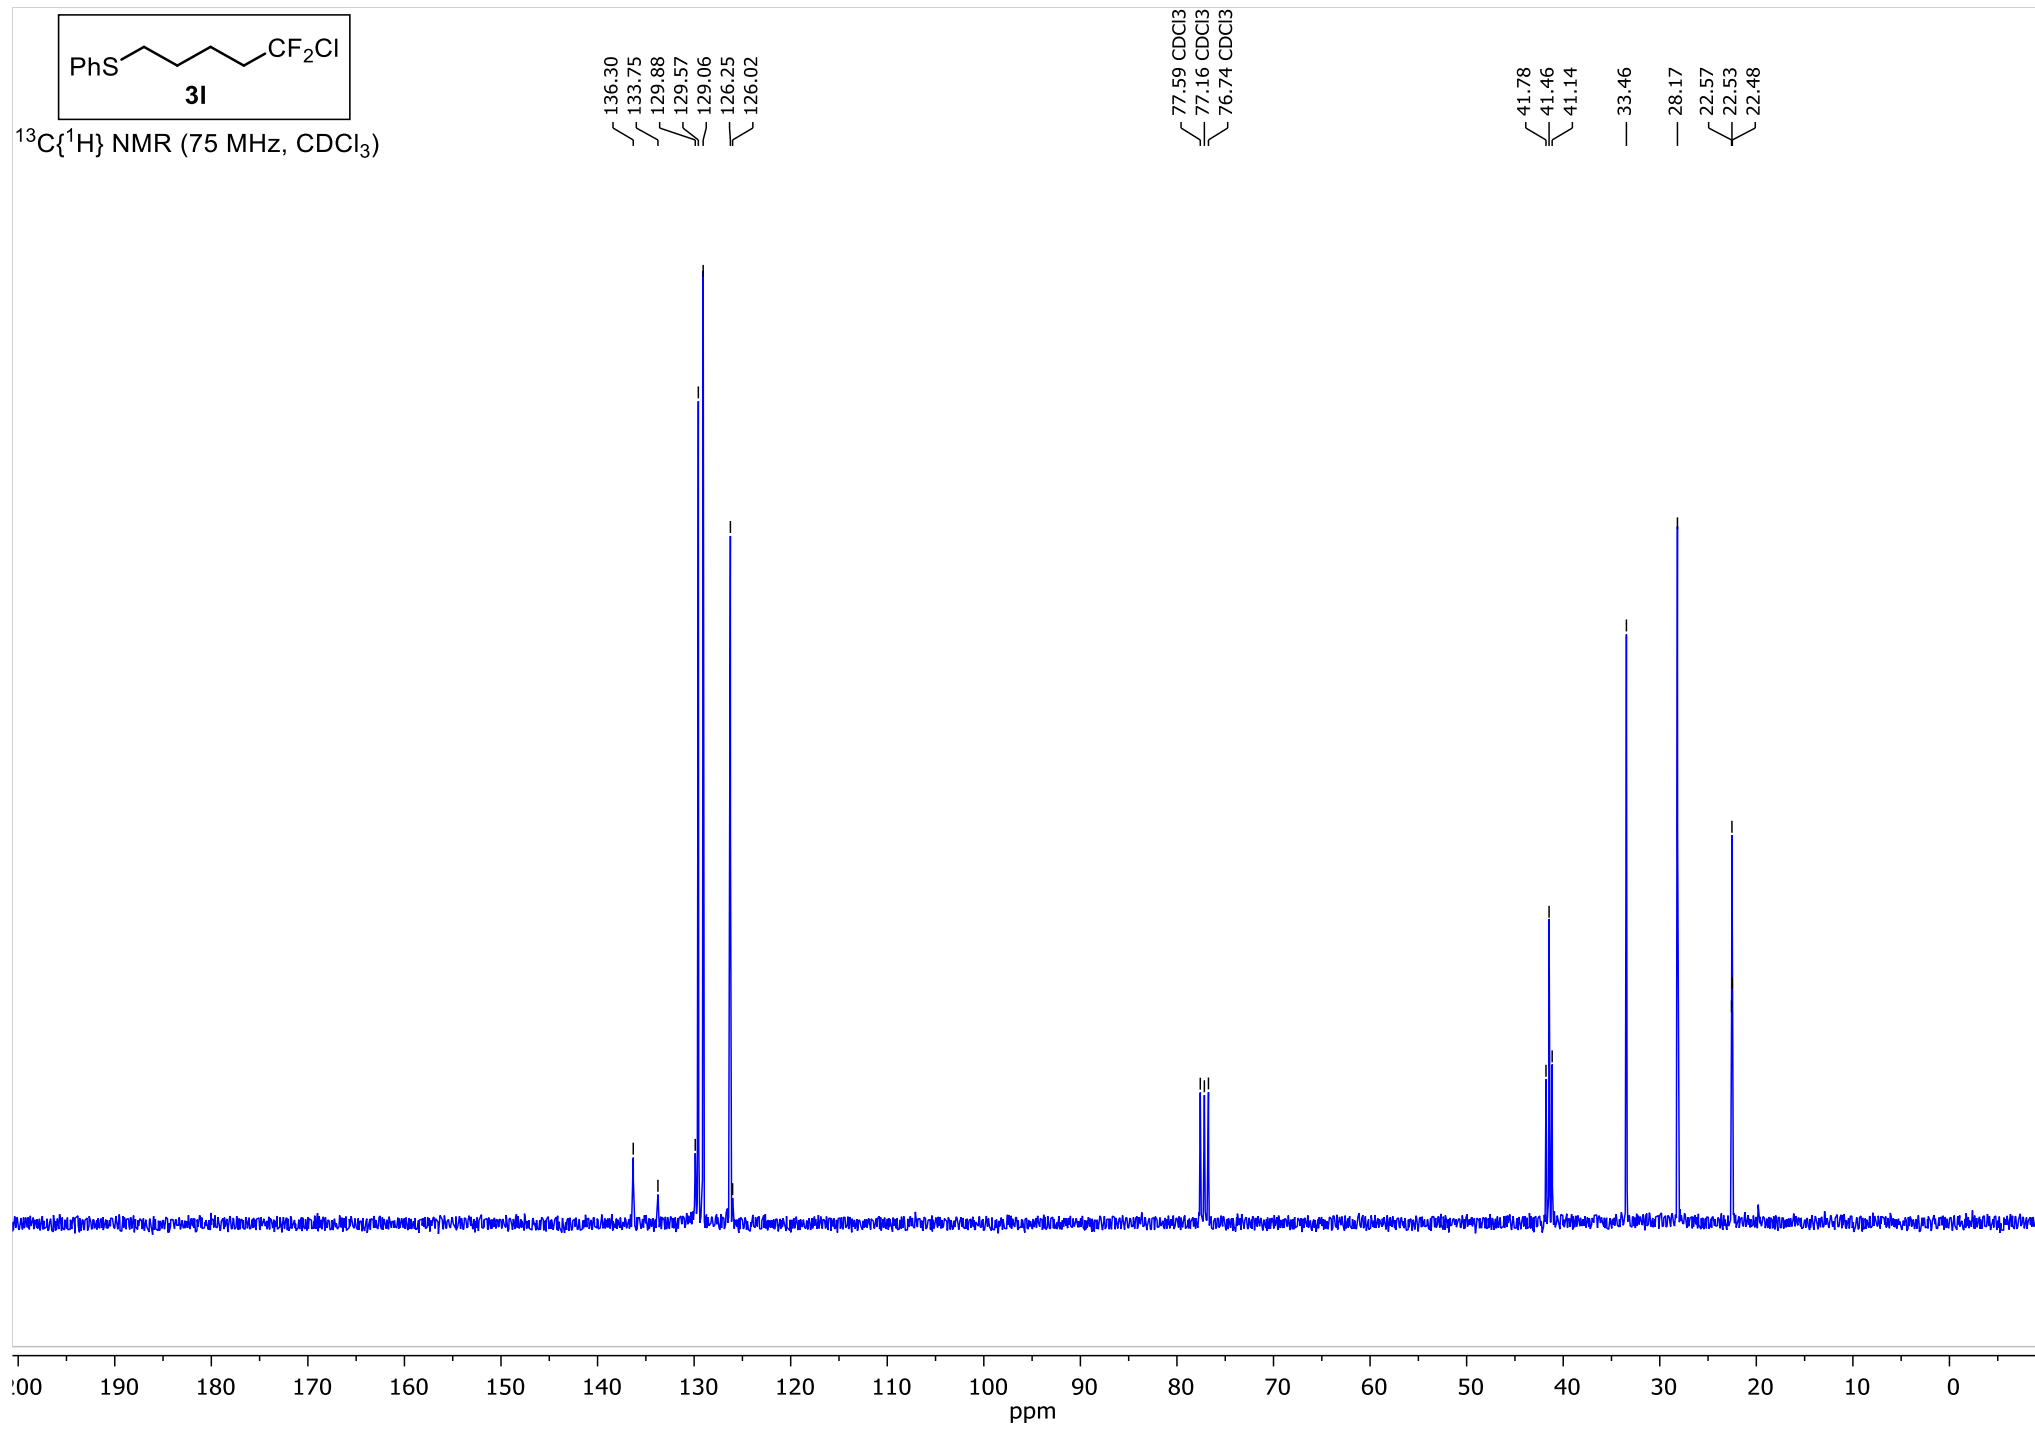

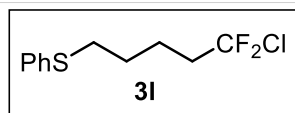

$^{19}\text{F}$  NMR (282 MHz,  $\text{CDCl}_3$ )

-51.30  
-51.35  
-51.40

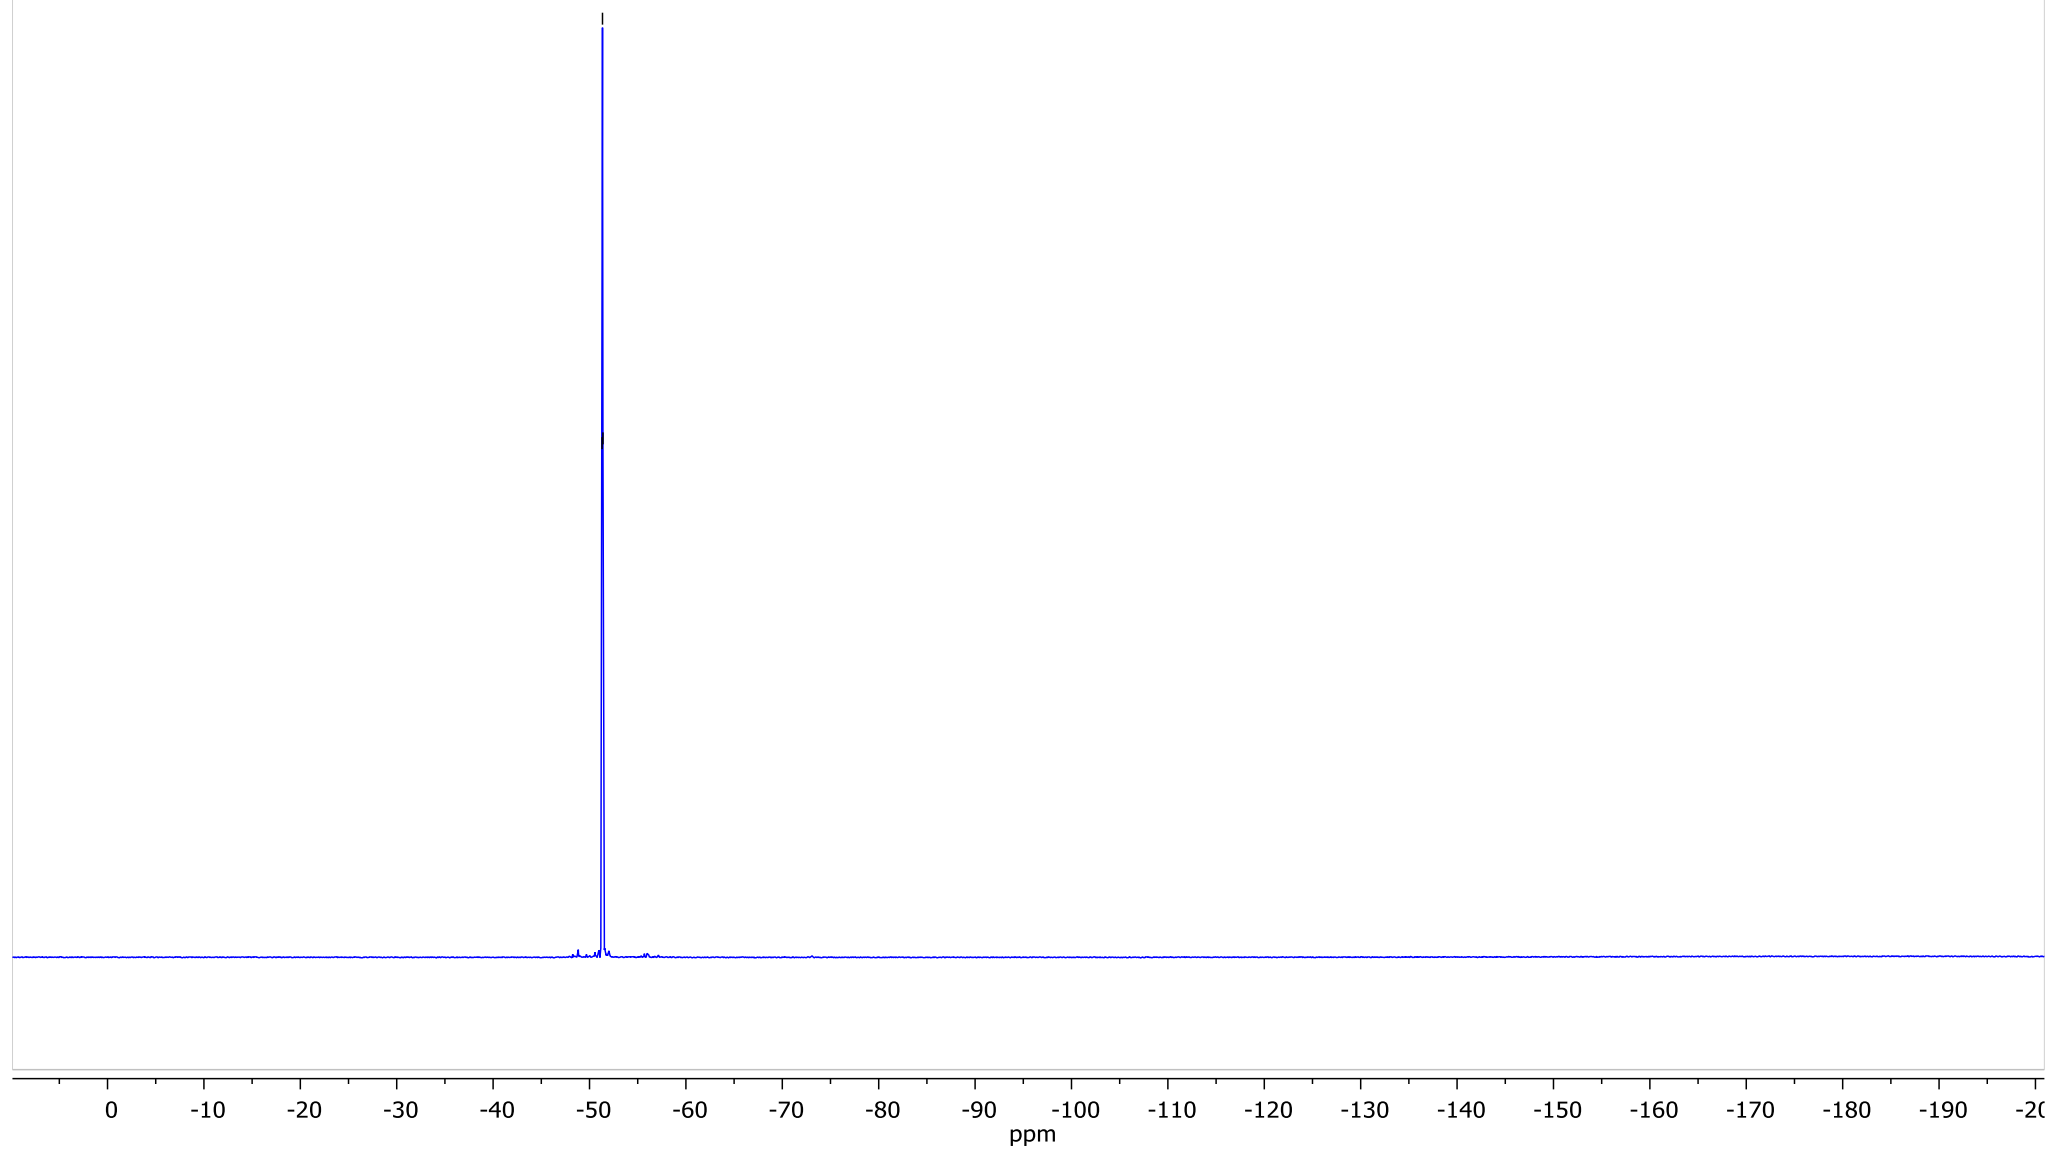

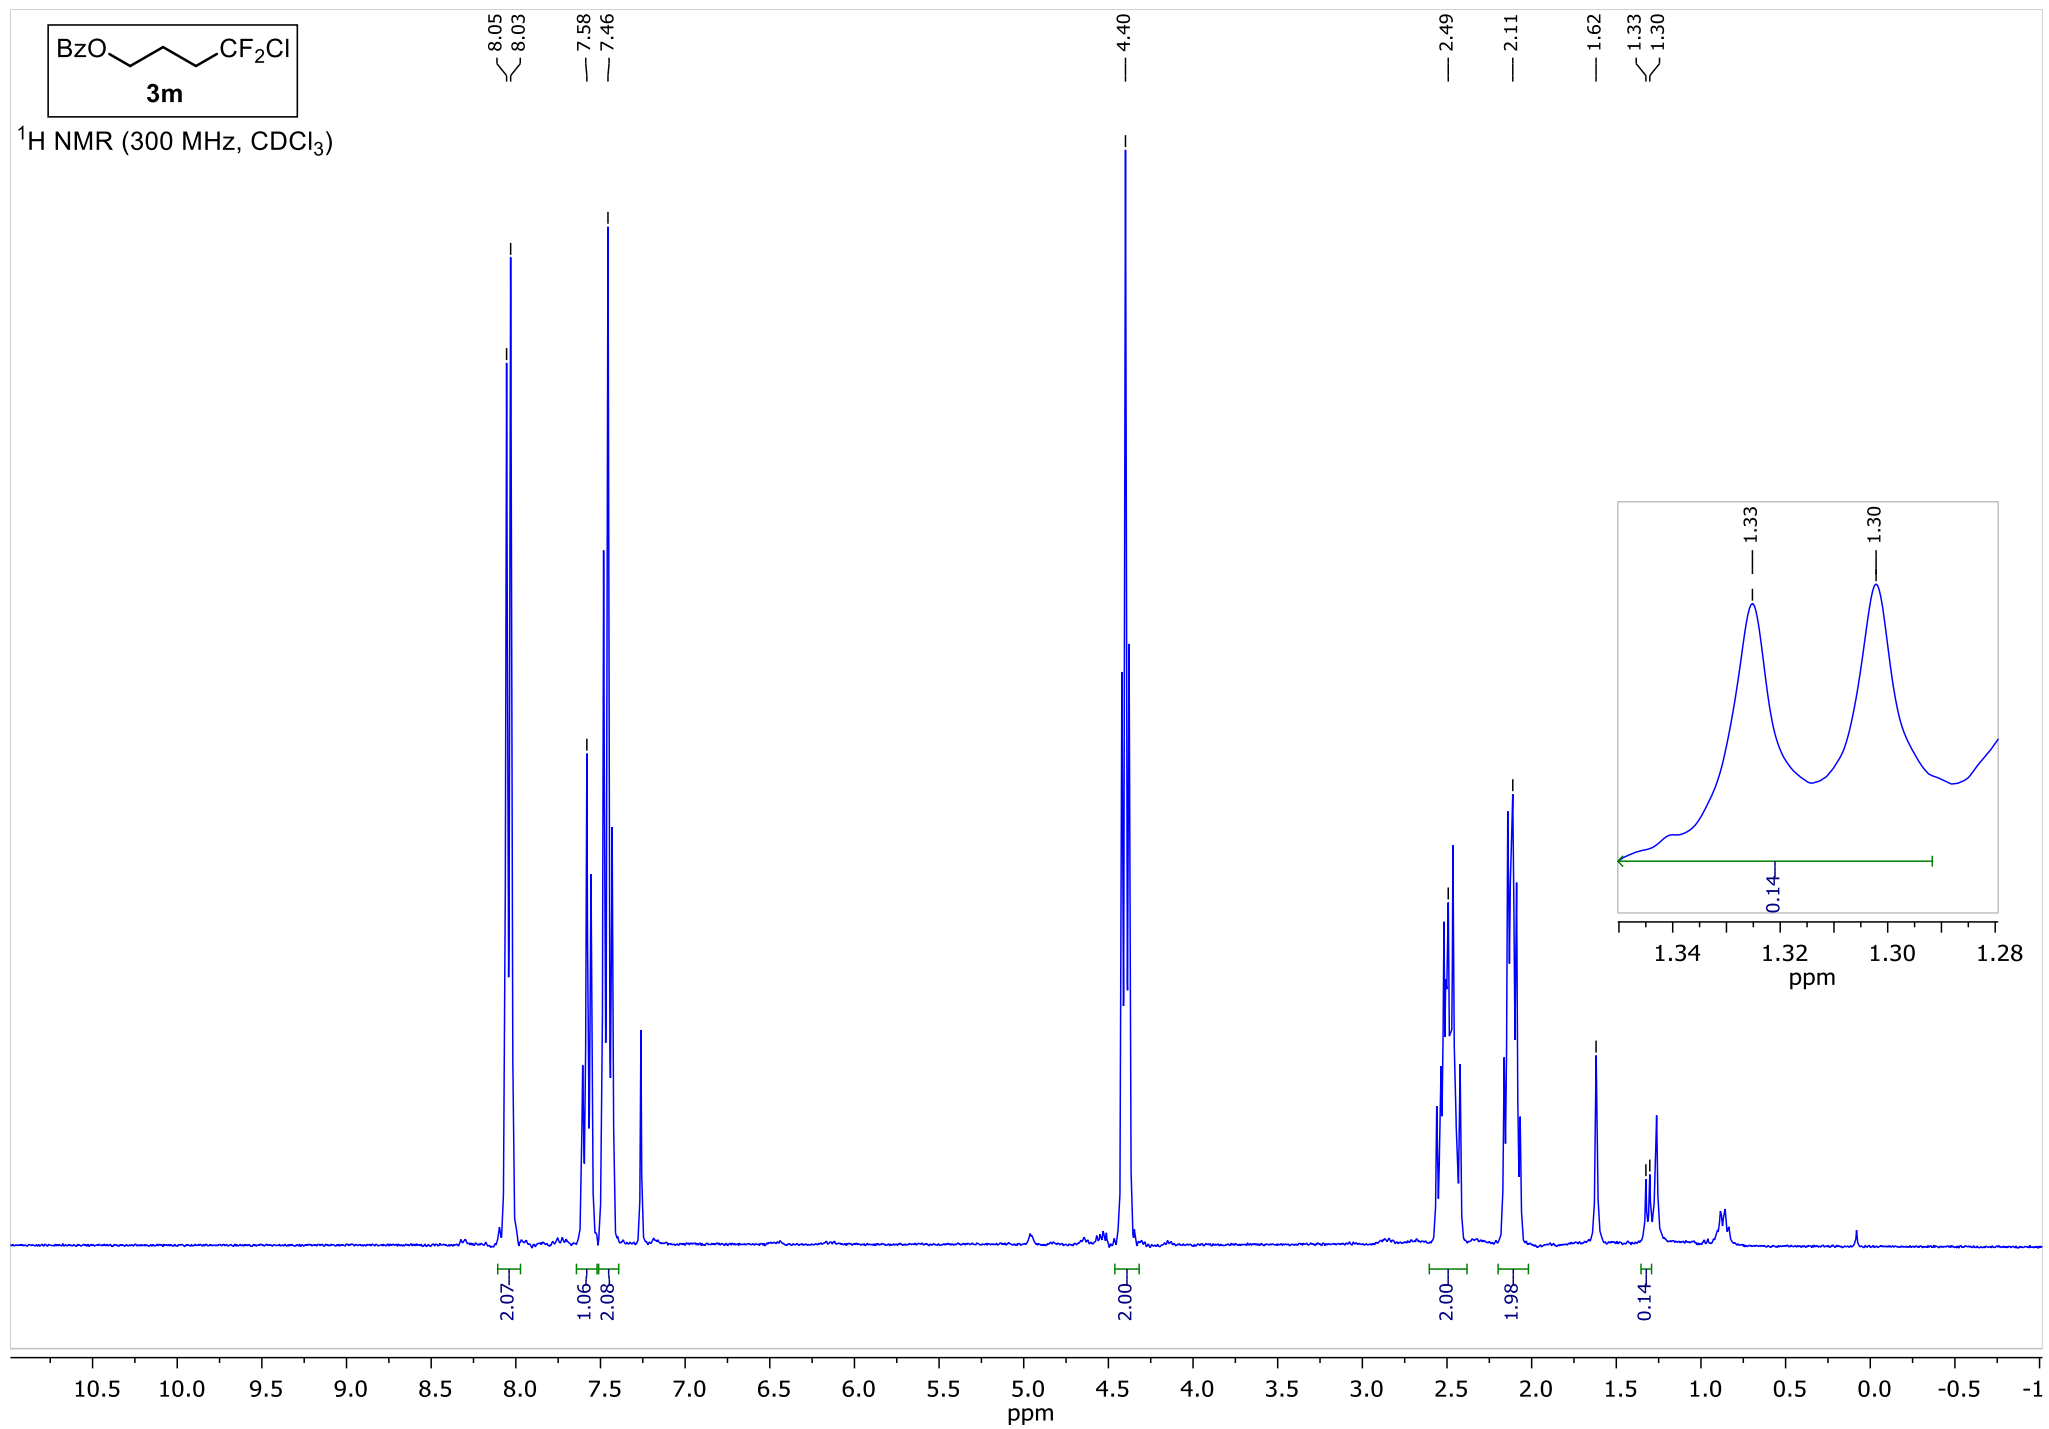

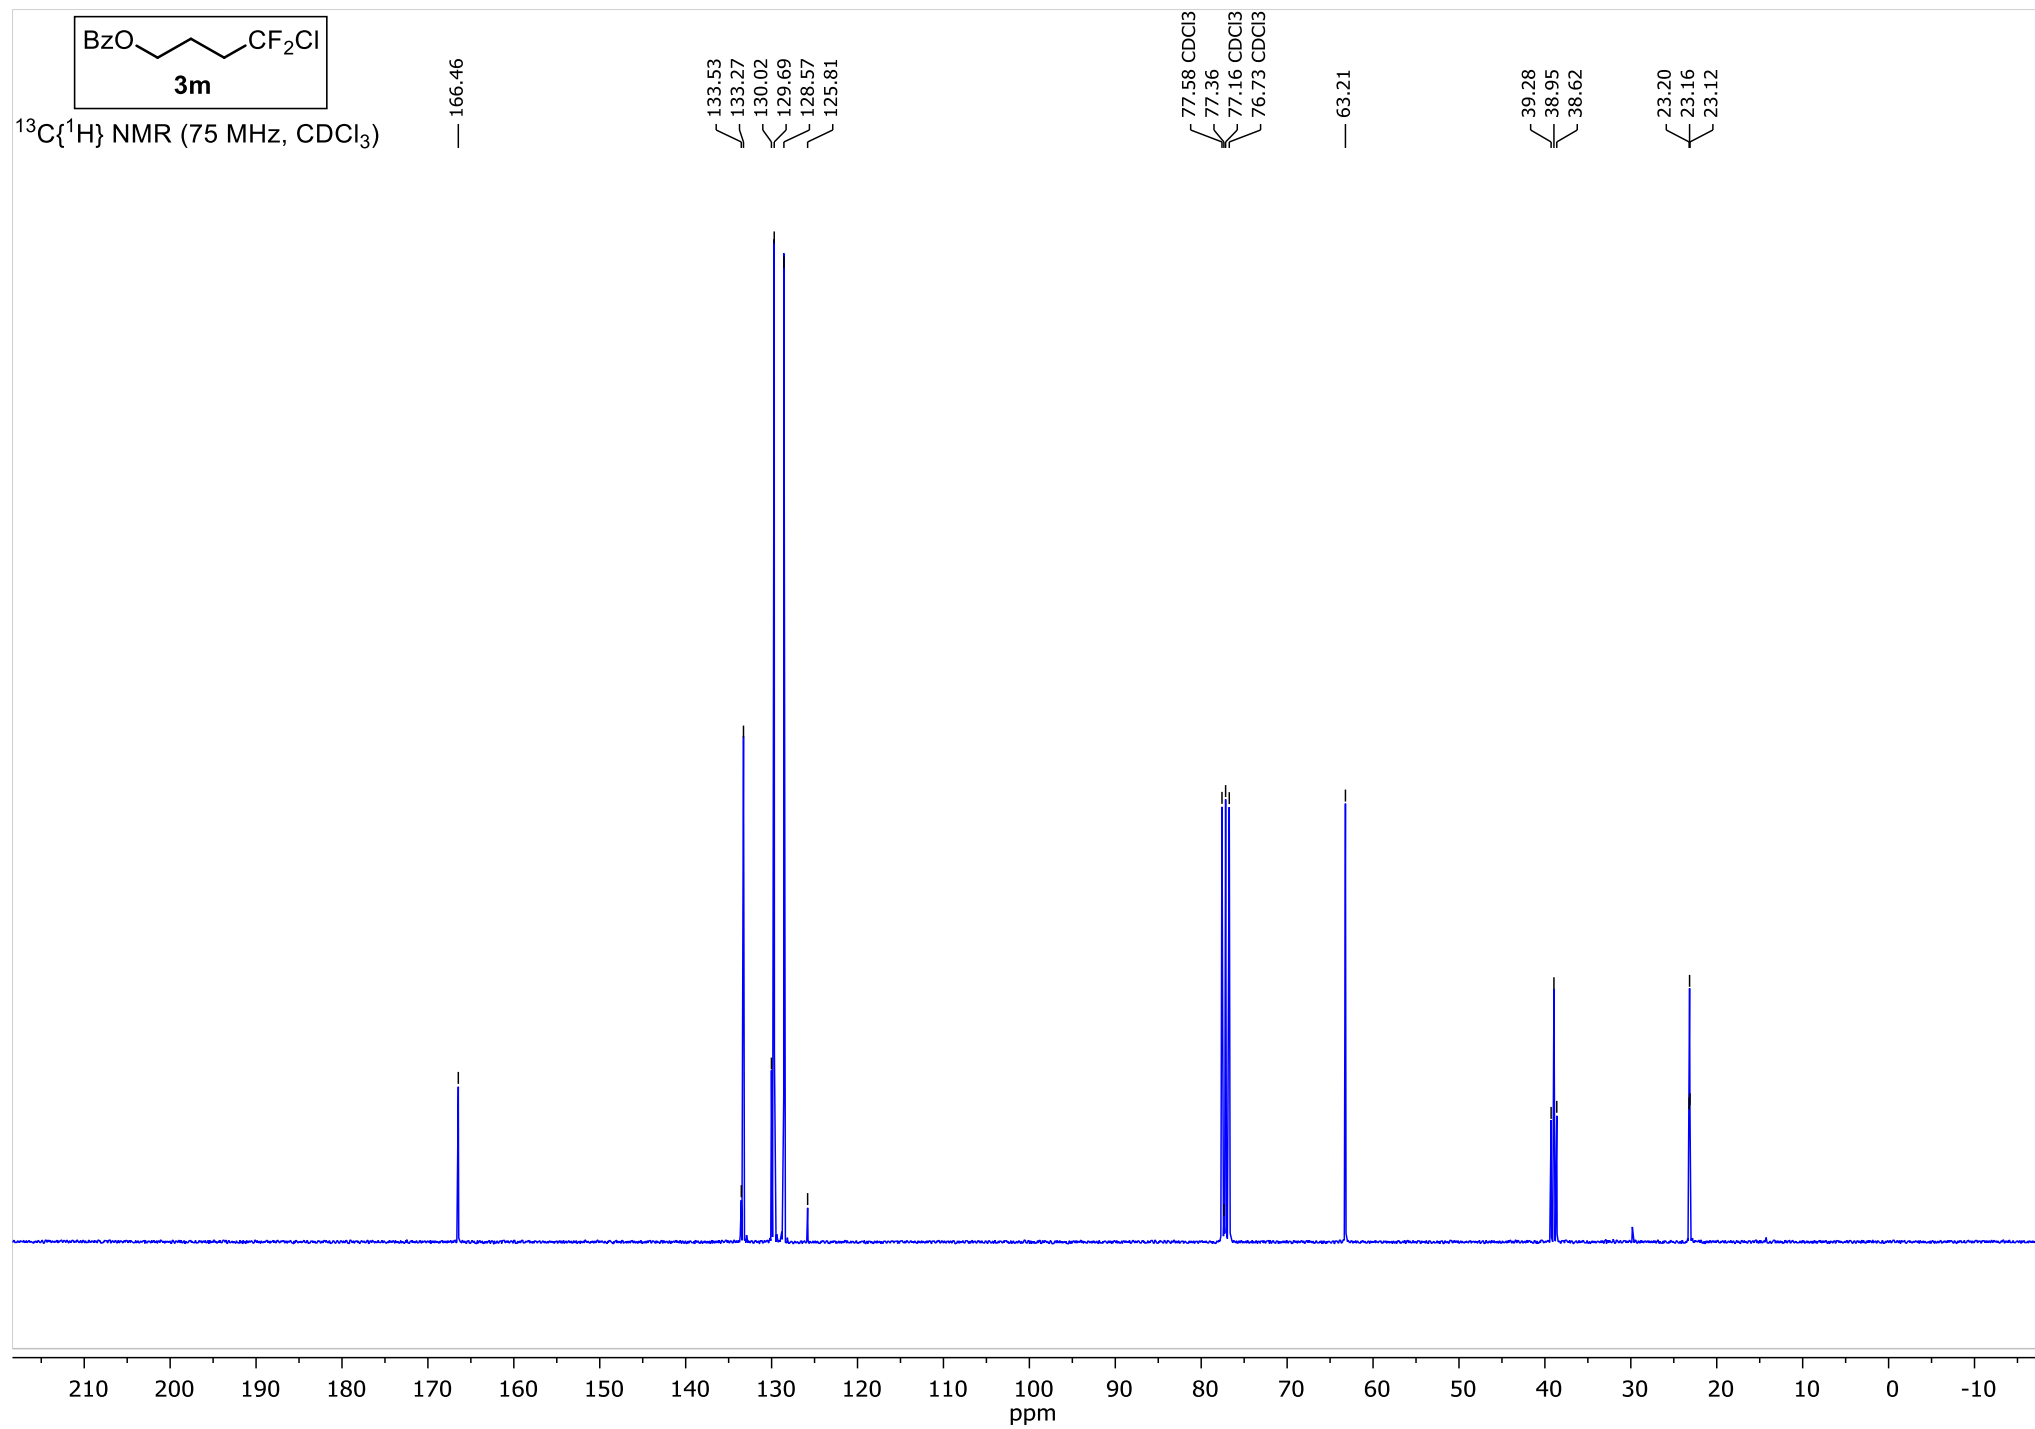

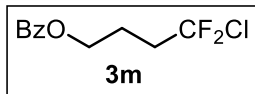

$^{19}\text{F}$  NMR (282 MHz,  $\text{CDCl}_3$ )

-51.63  
-51.67  
-51.72  
-55.22  
-55.25

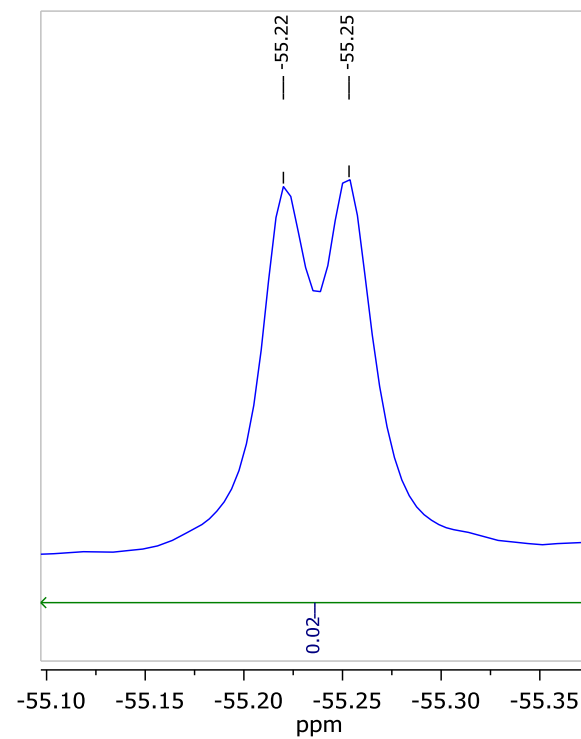

1.00  
0.02

0 -10 -20 -30 -40 -50 -60 -70 -80 -90 -100 -110 -120 -130 -140 -150 -160 -170 -180 -190 -200

ppm



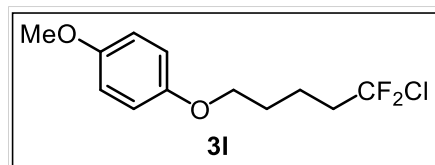

$^1\text{H}$  NMR (300 MHz,  $\text{CDCl}_3$ )

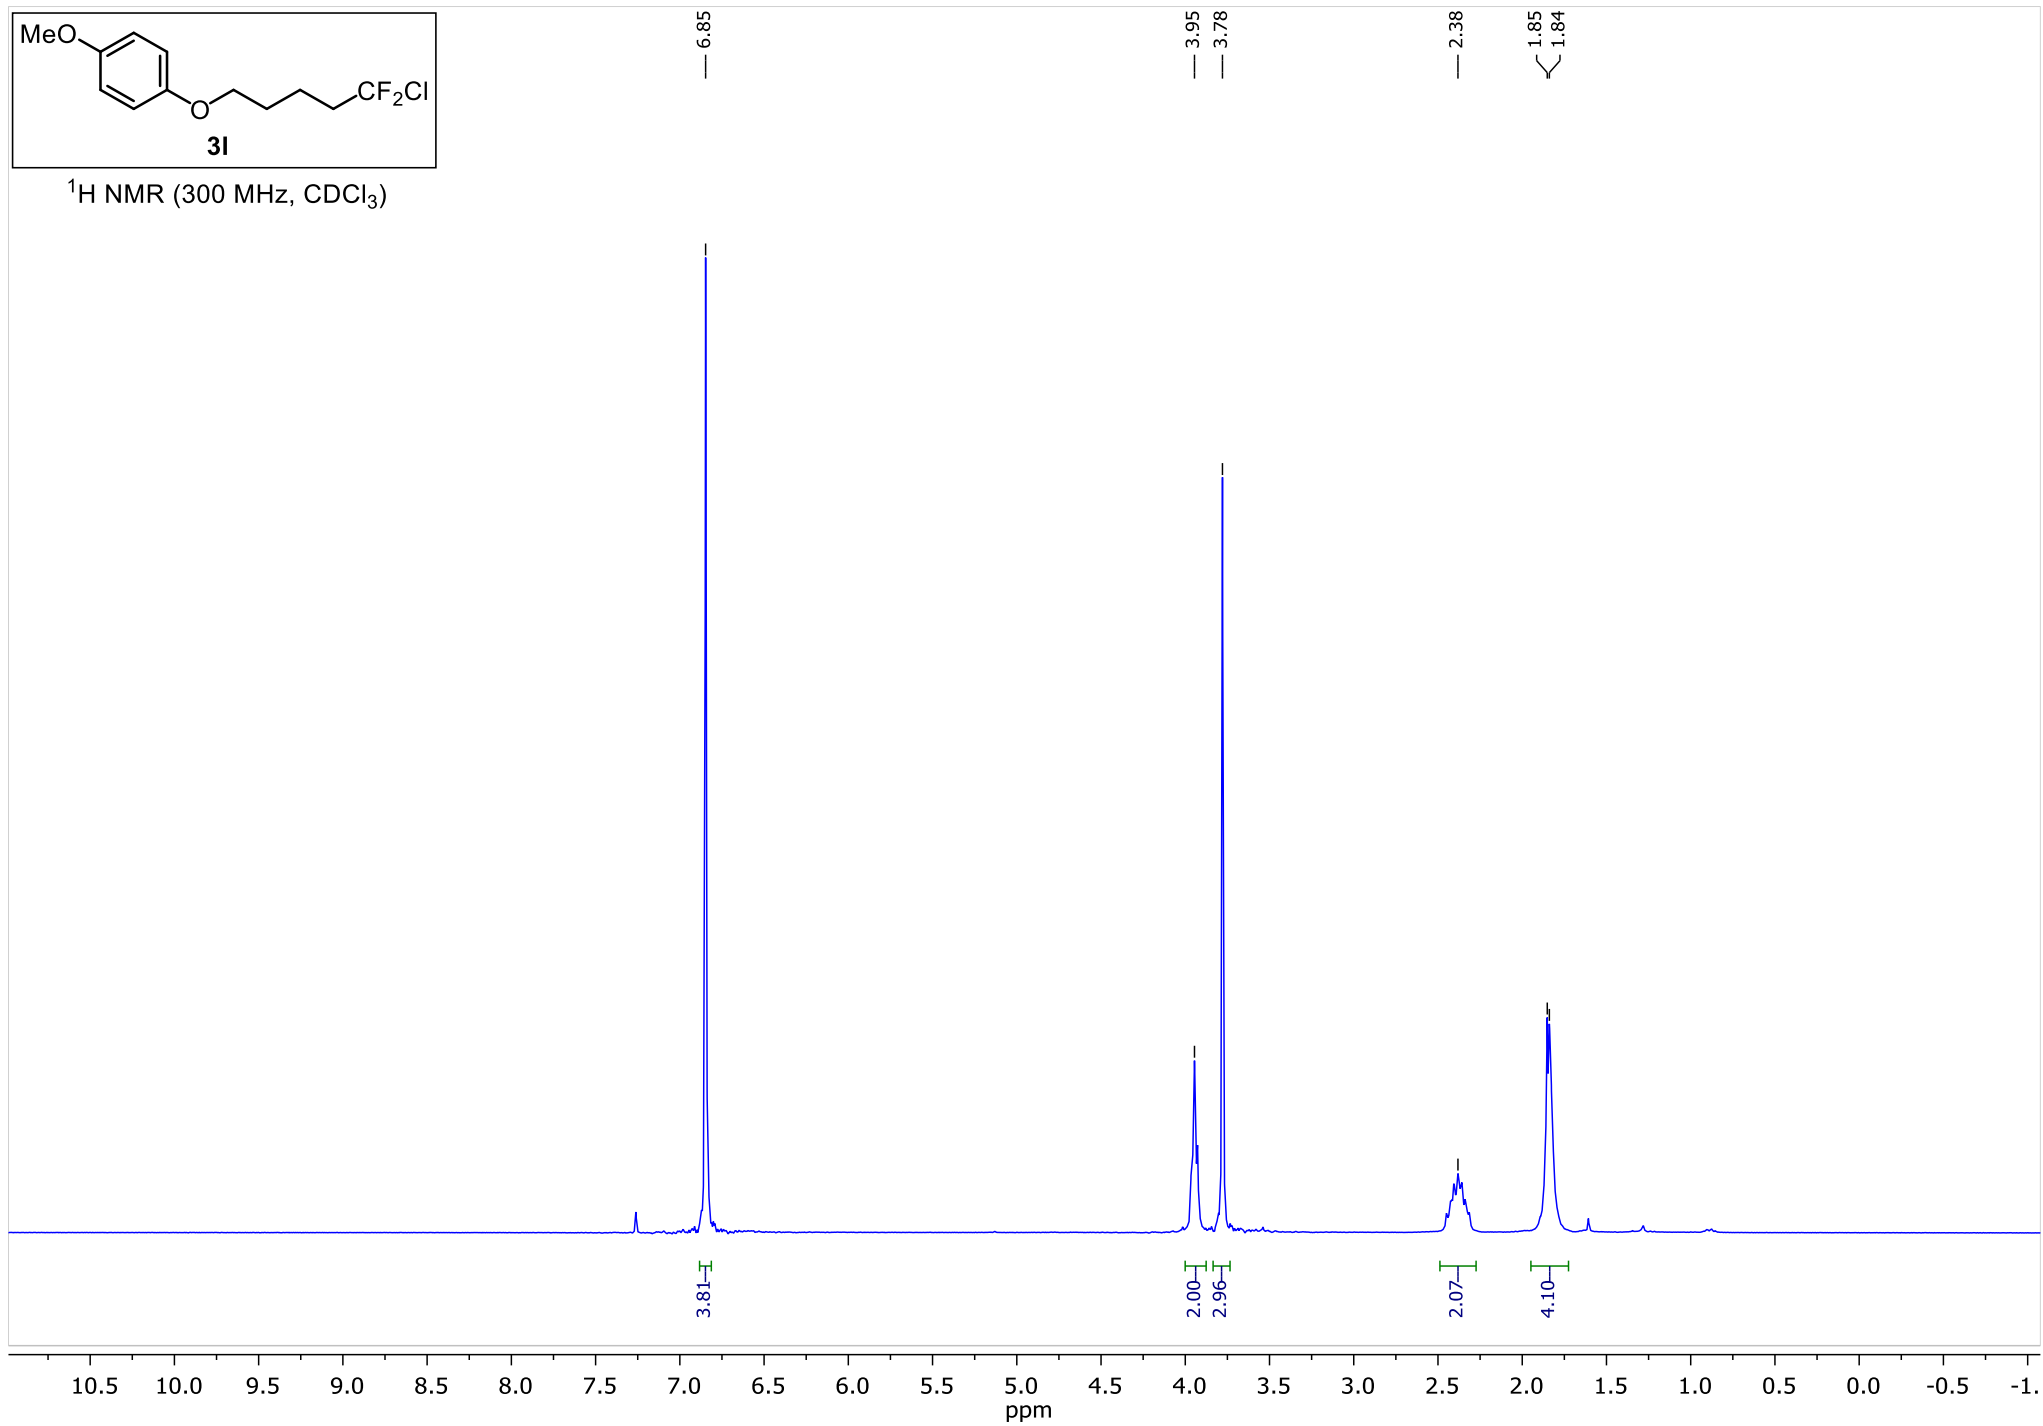

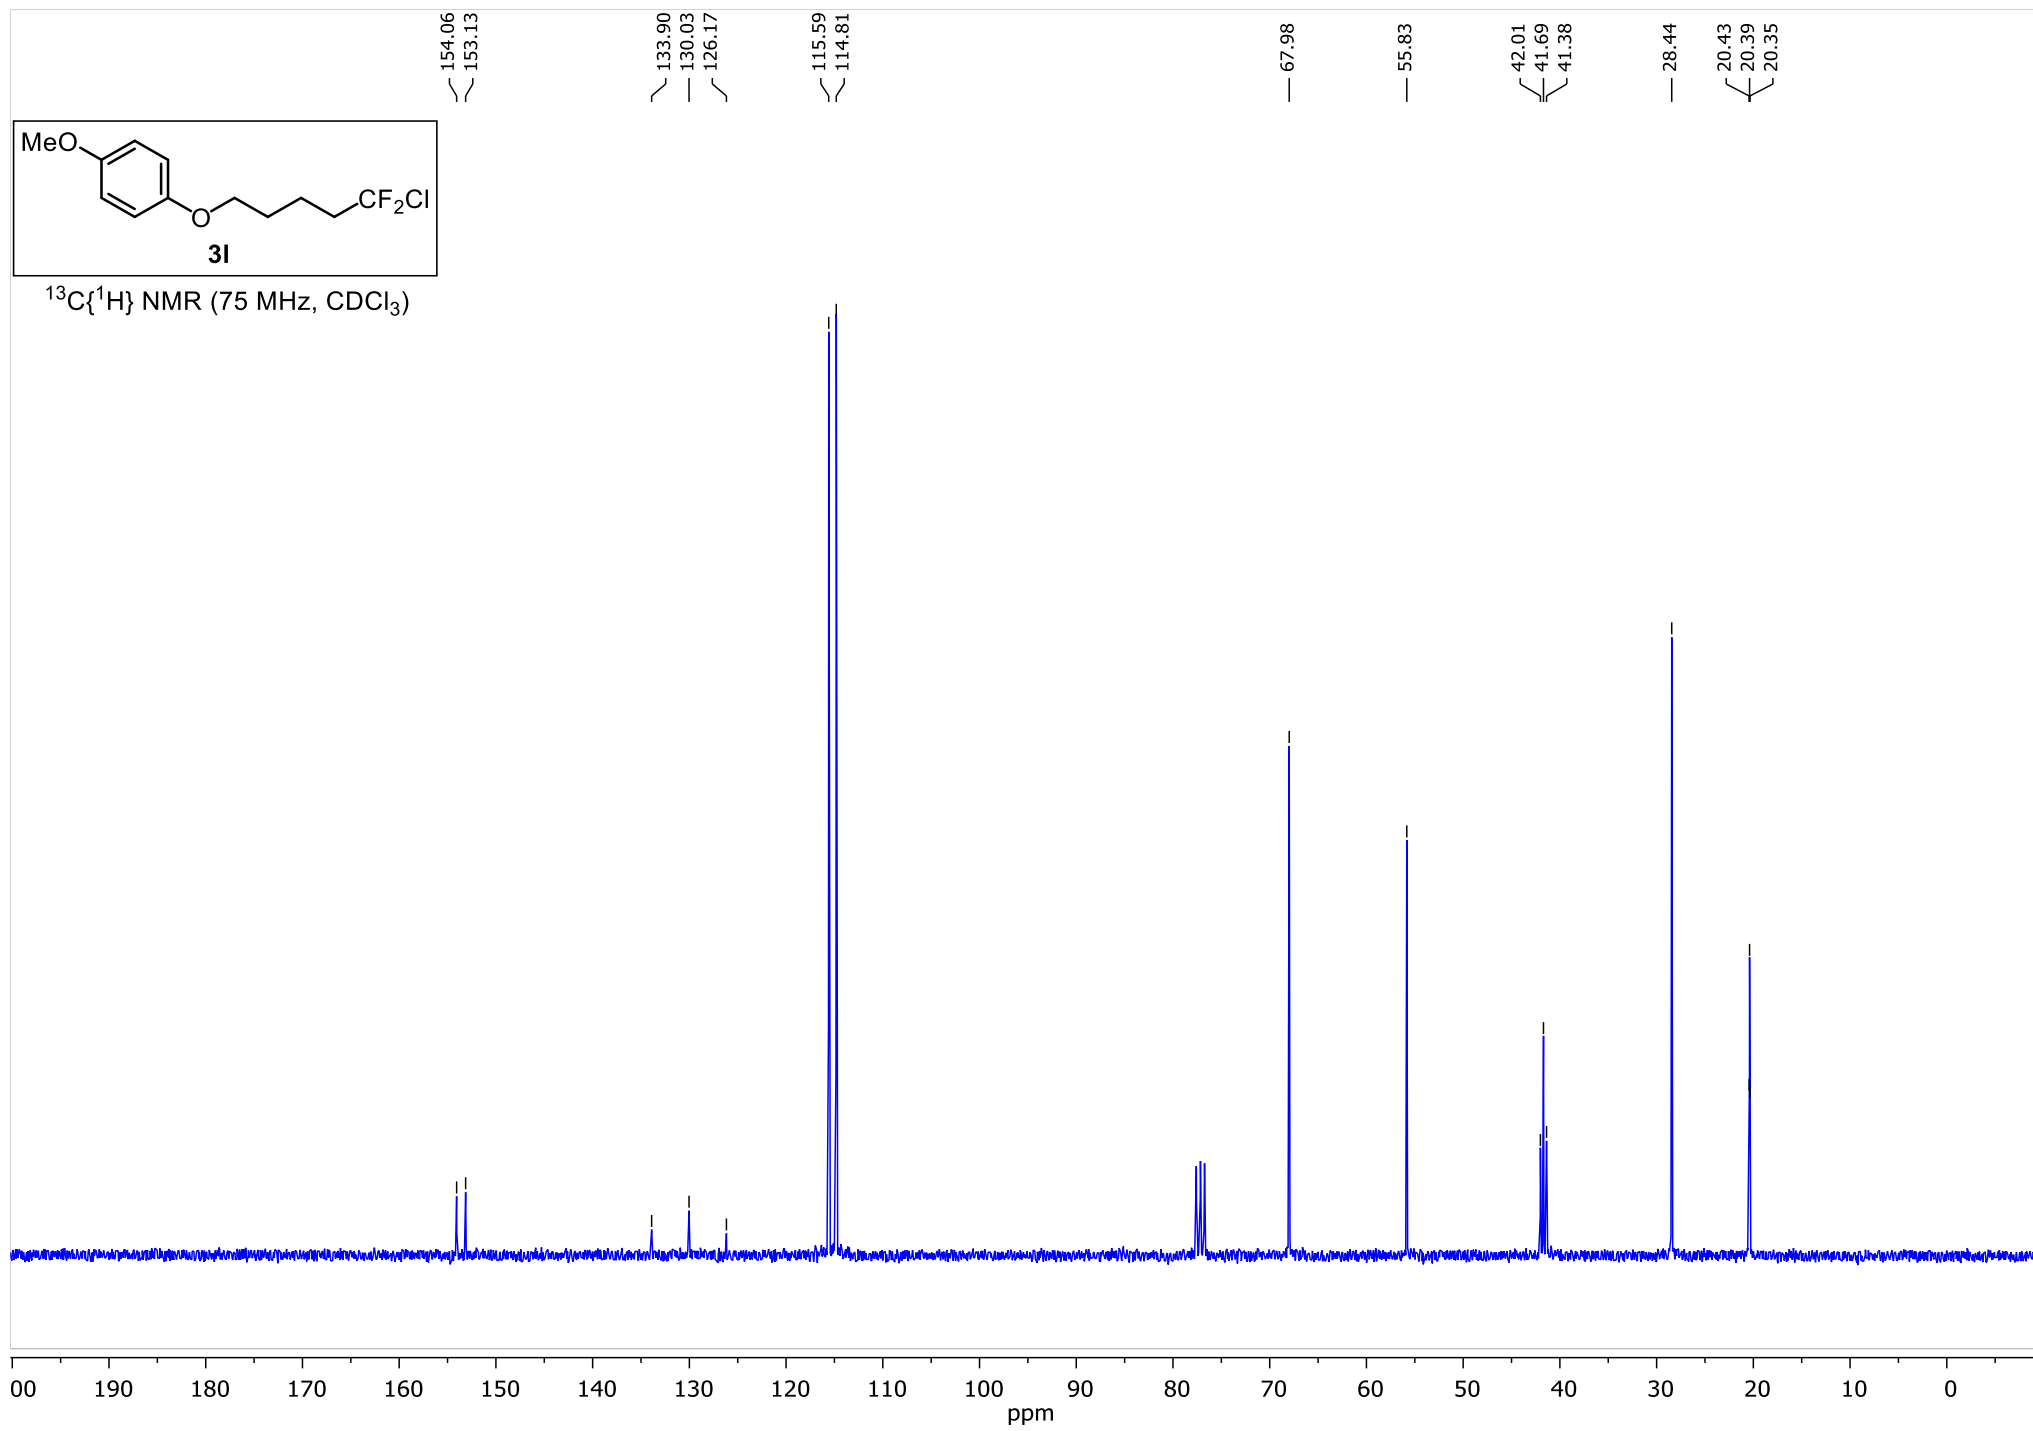

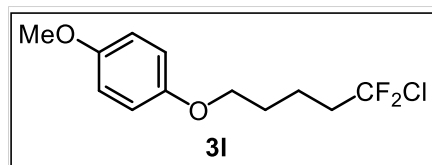

$^{19}\text{F}$  NMR (282 MHz,  $\text{CDCl}_3$ )

-51.35  
-51.40  
-51.44

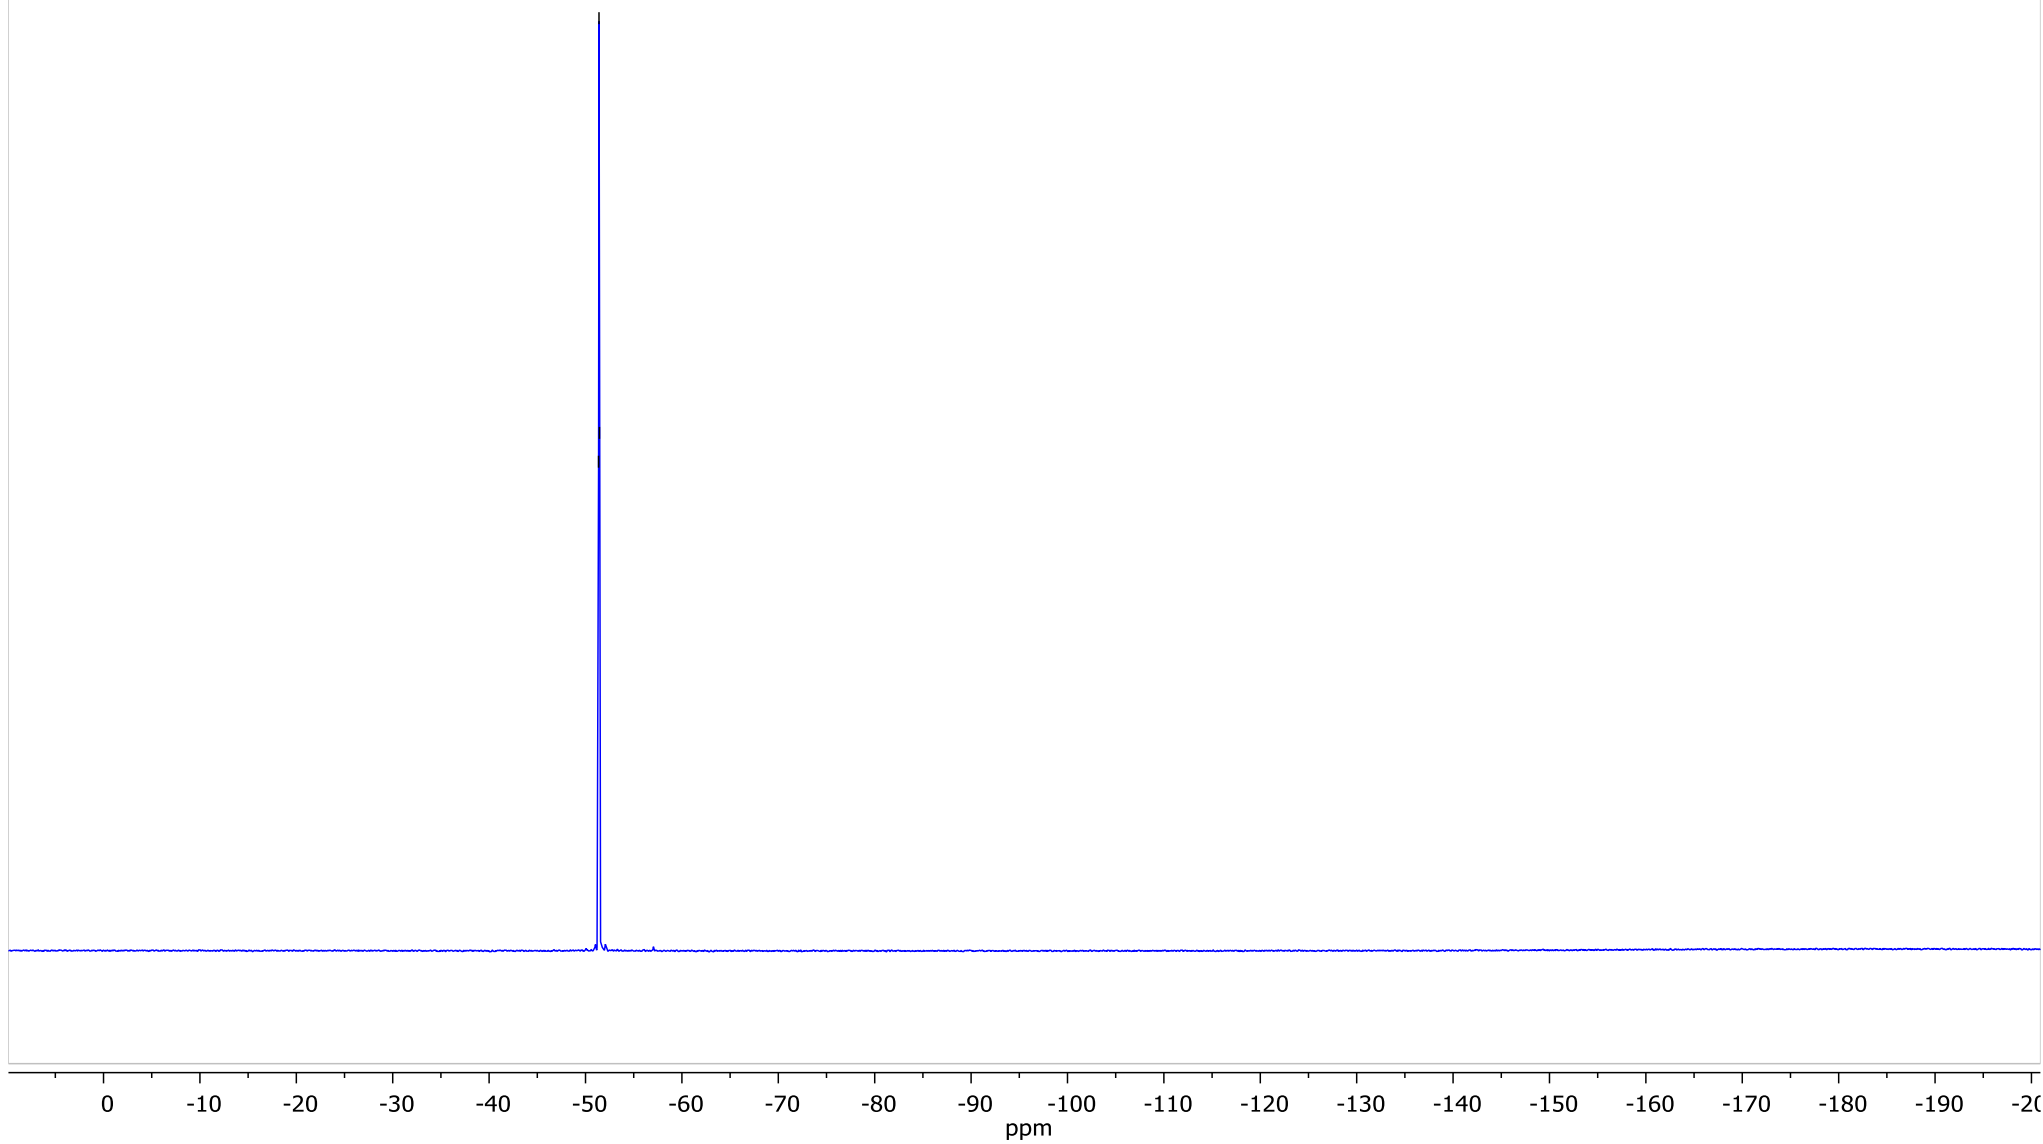

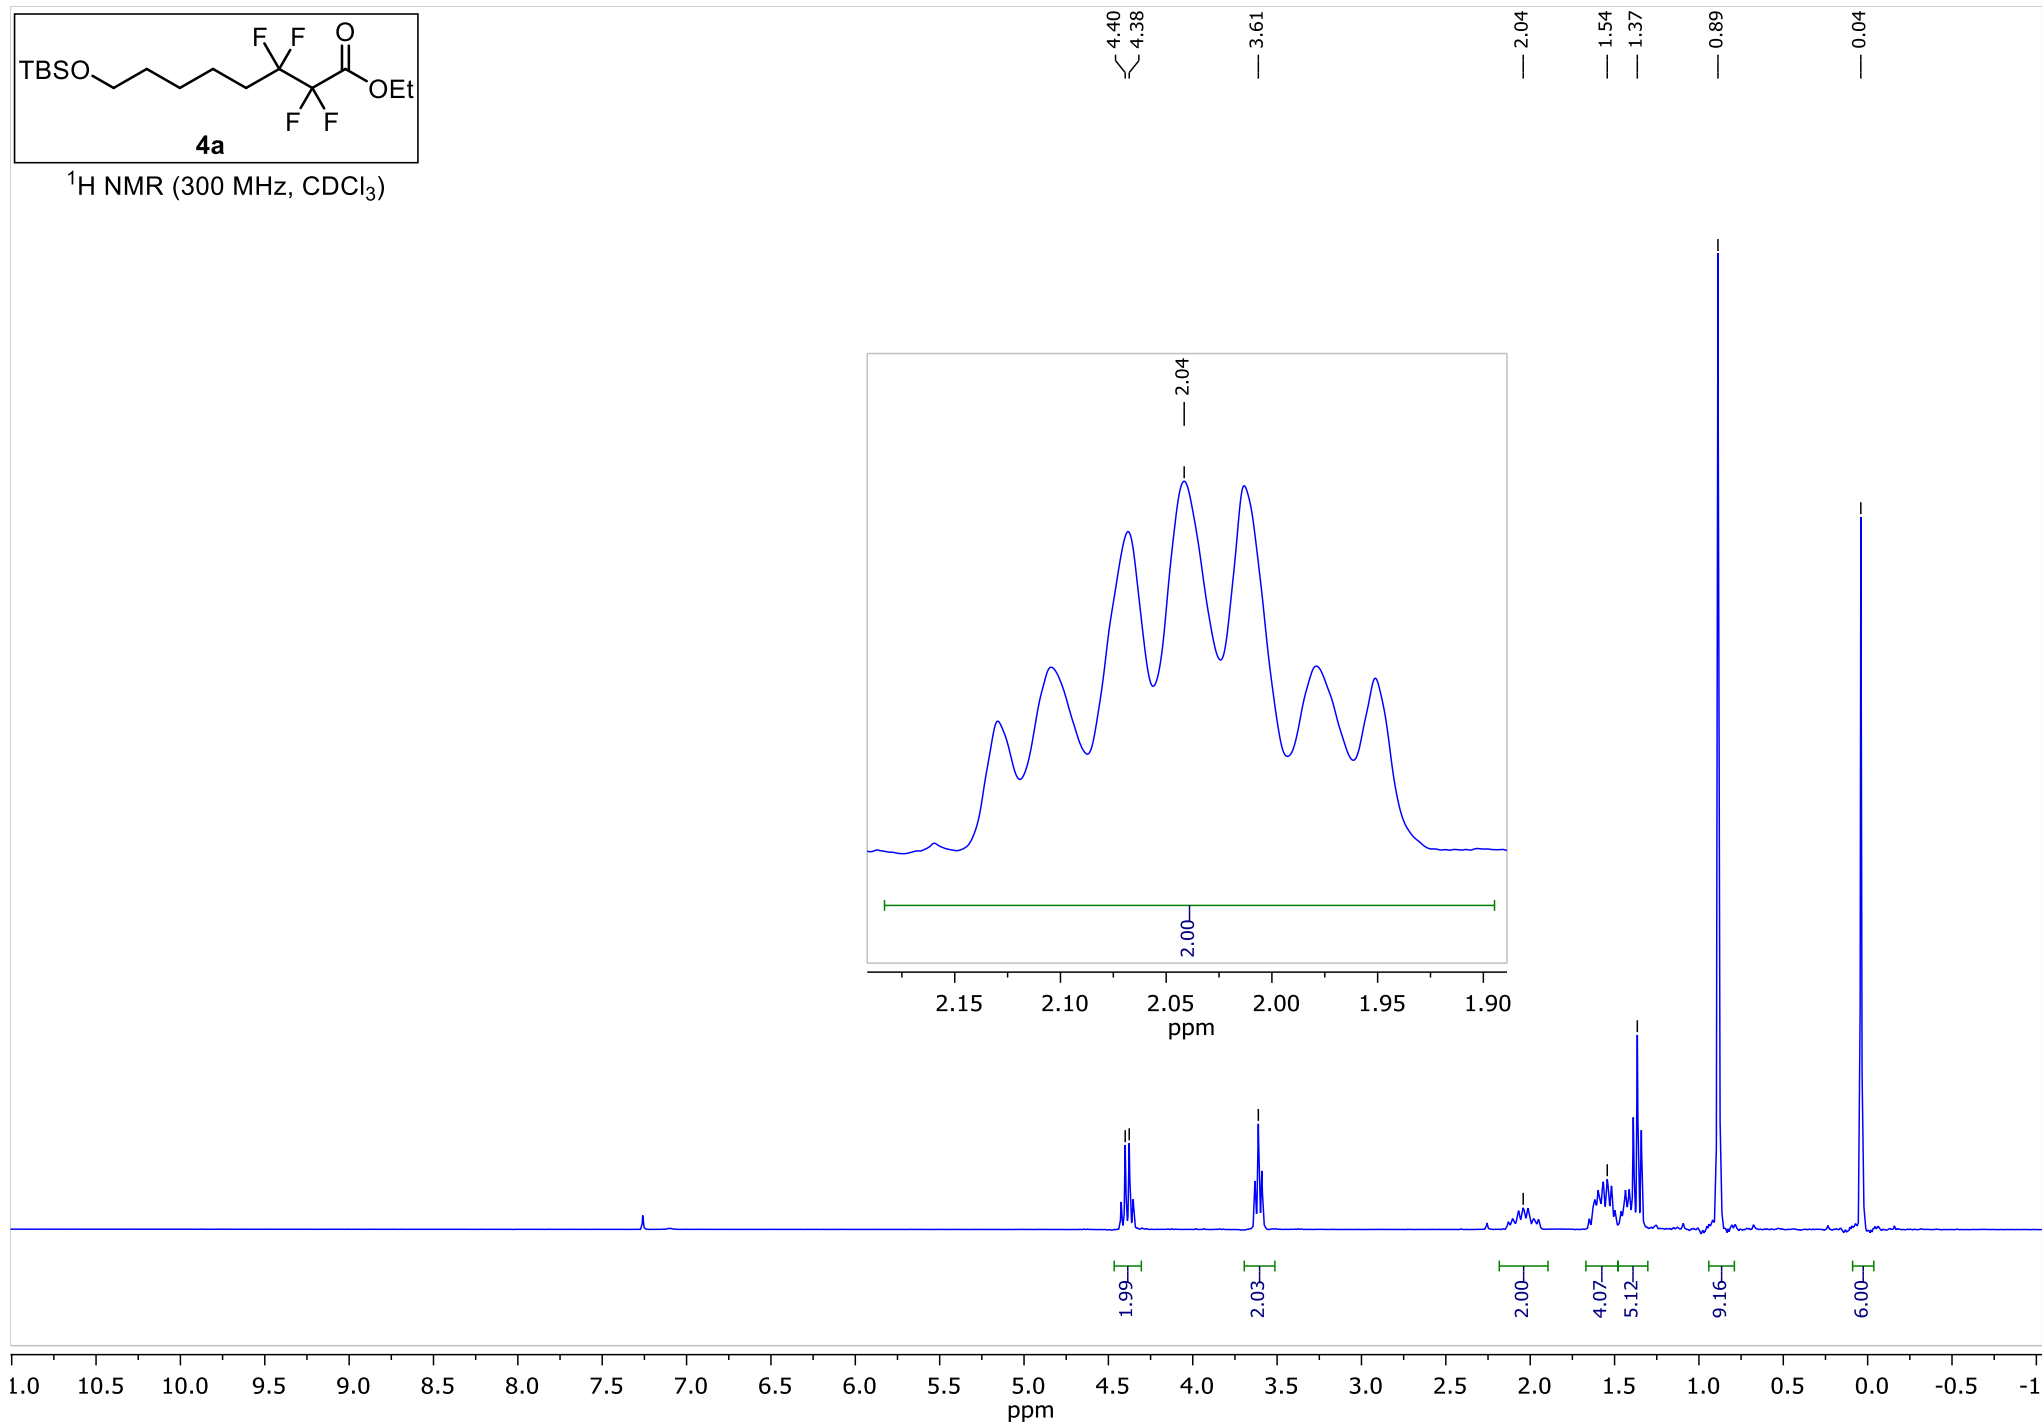

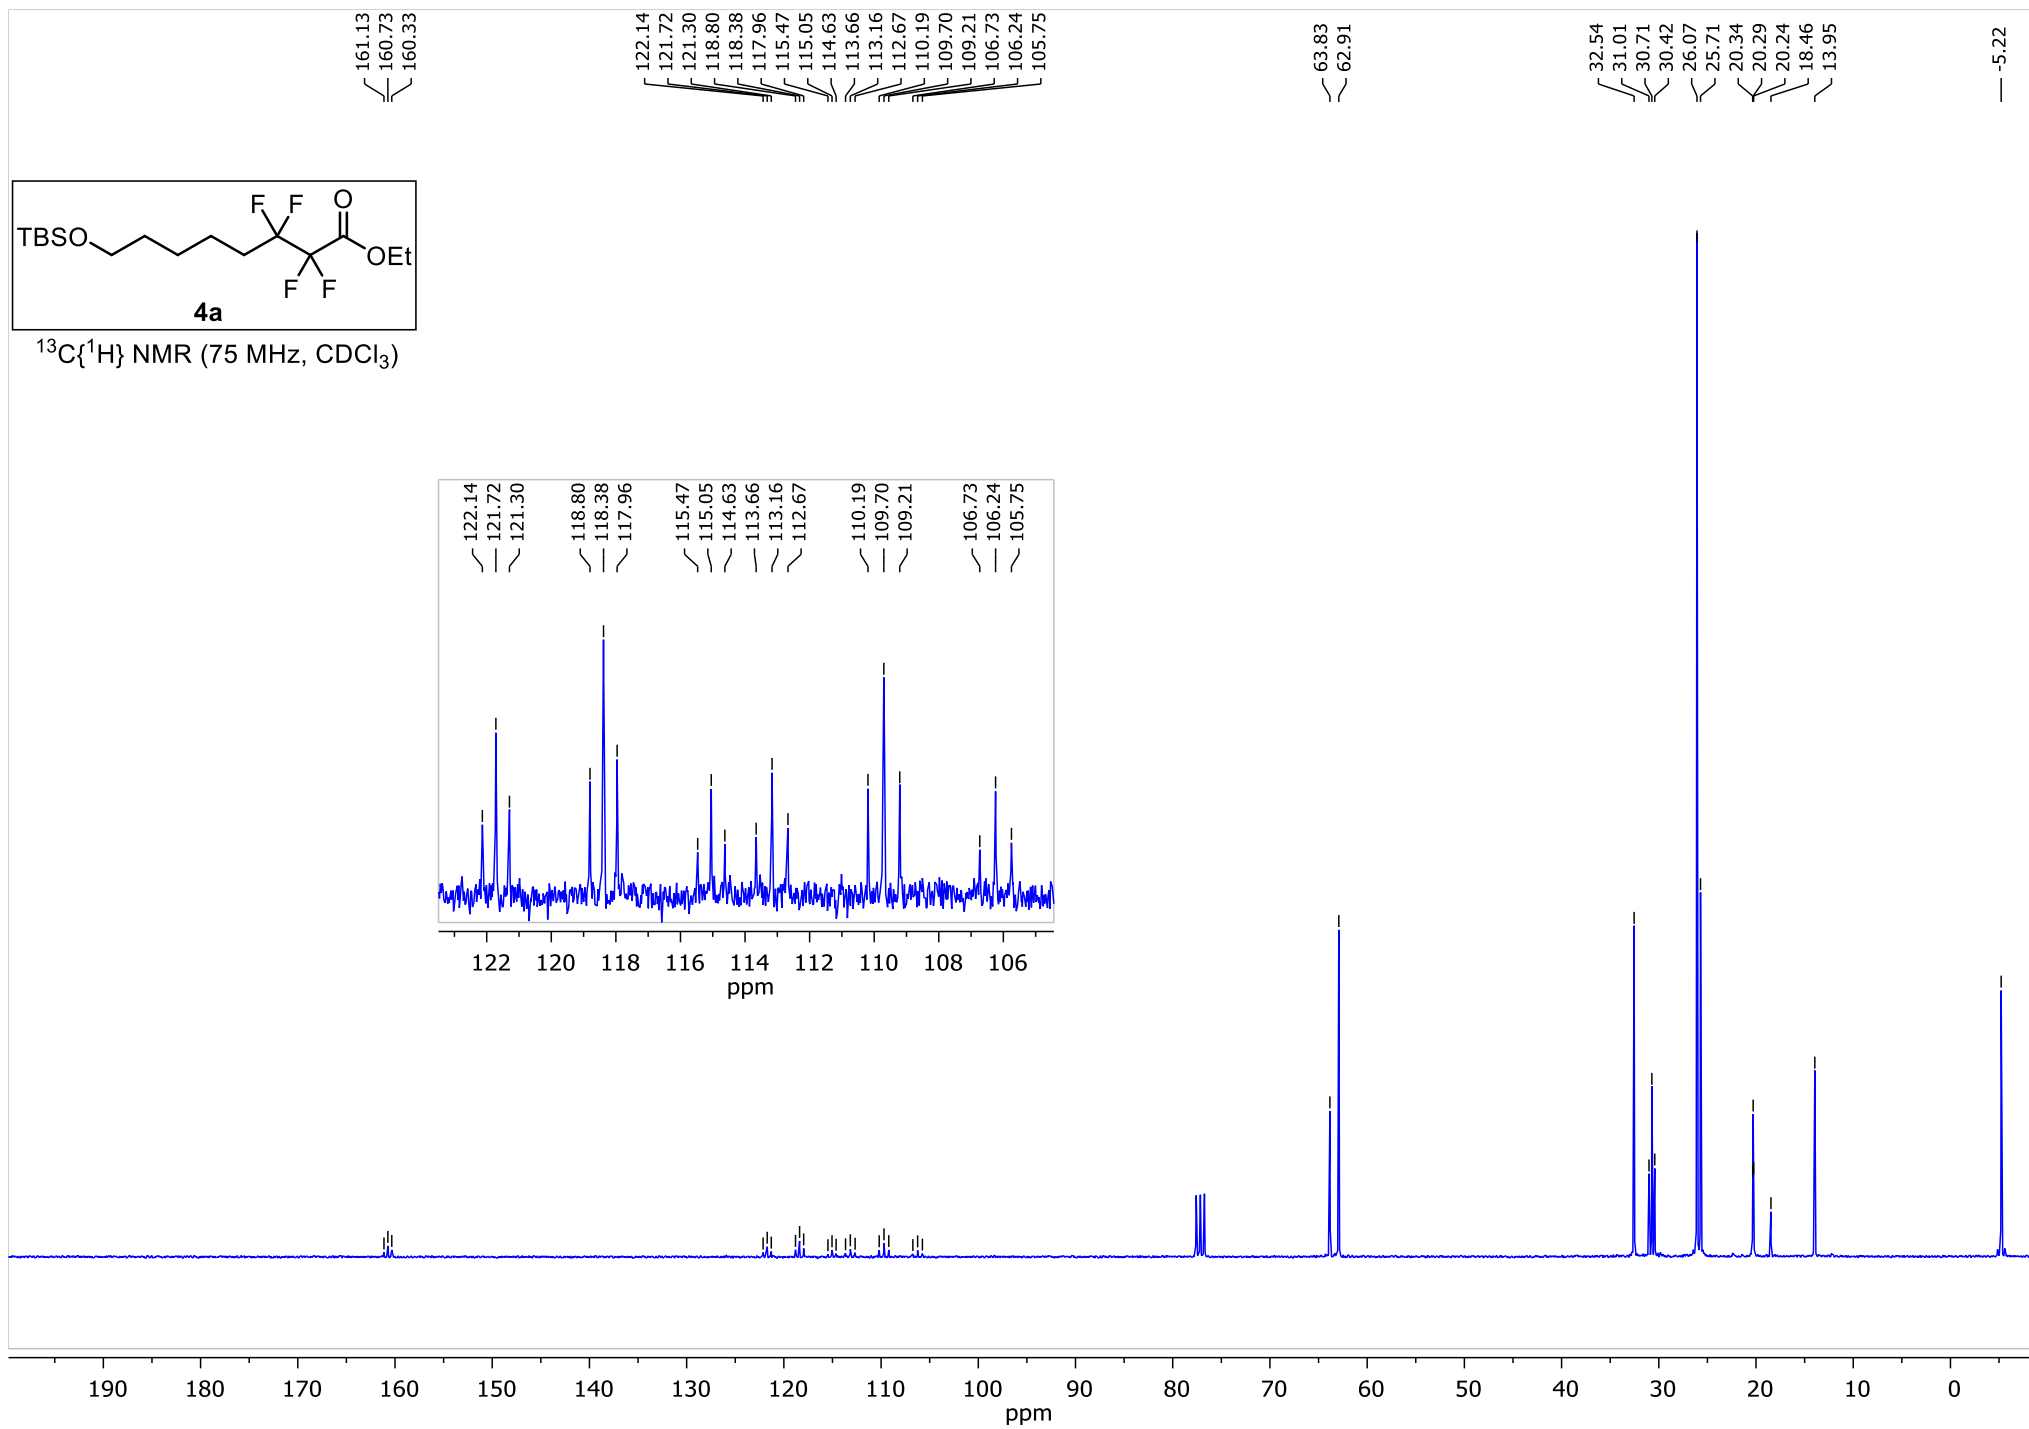

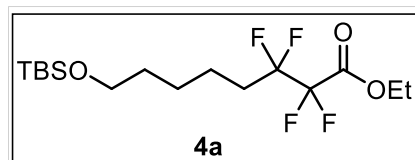

$^{19}\text{F}$  NMR (282 MHz,  $\text{CDCl}_3$ )

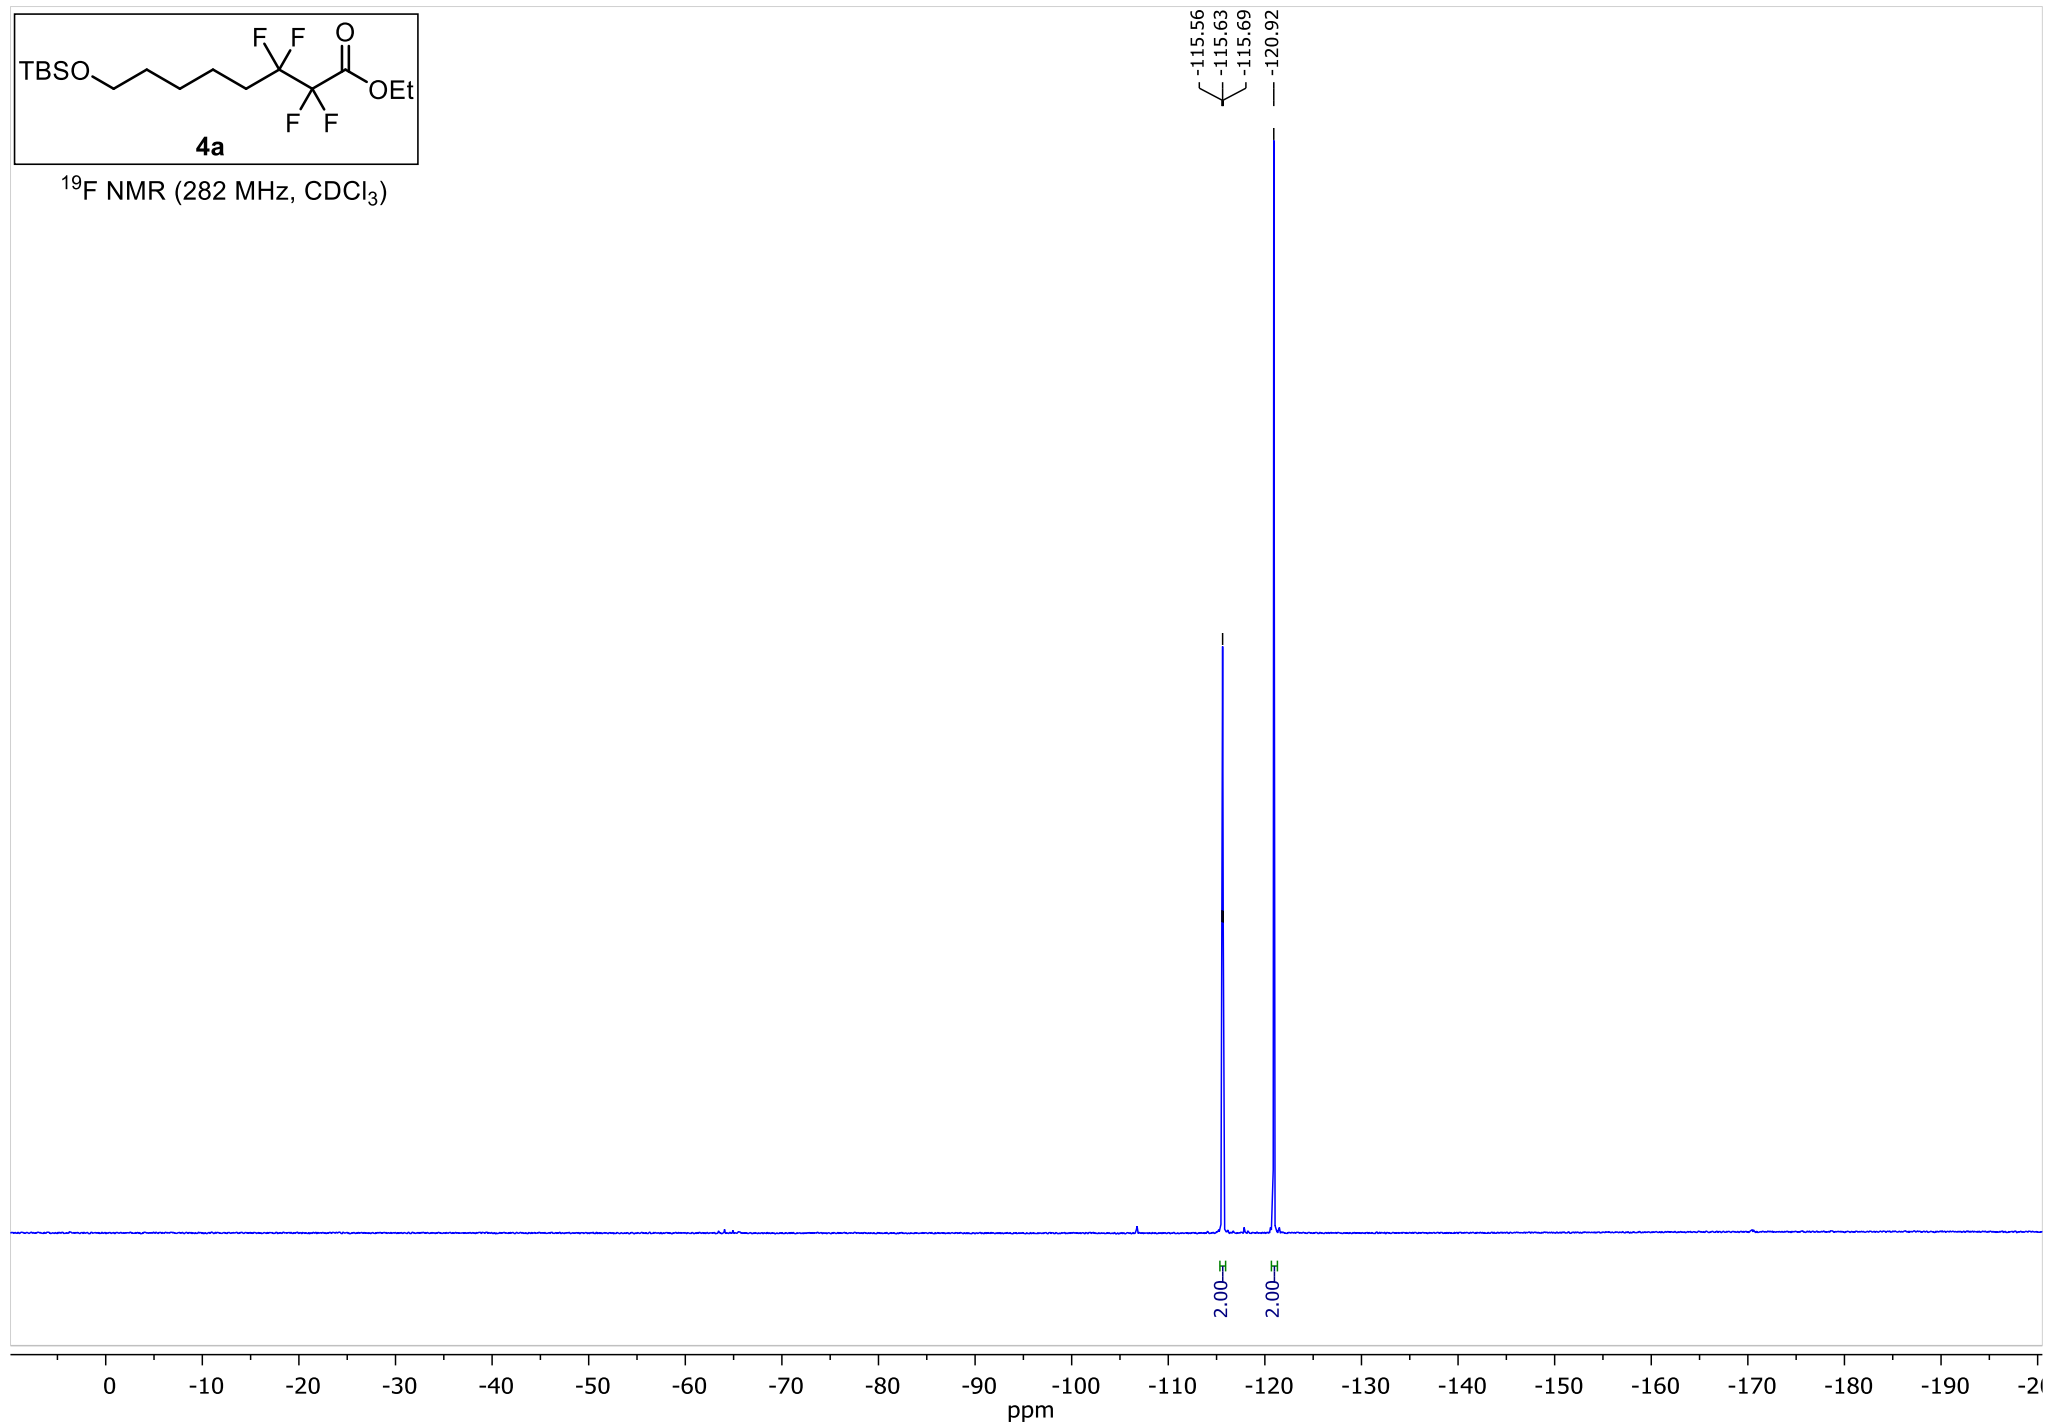

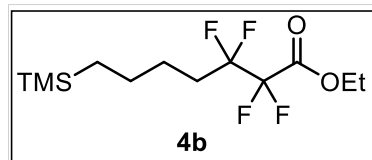

$^1\text{H}$  NMR (300 MHz,  $\text{CDCl}_3$ )

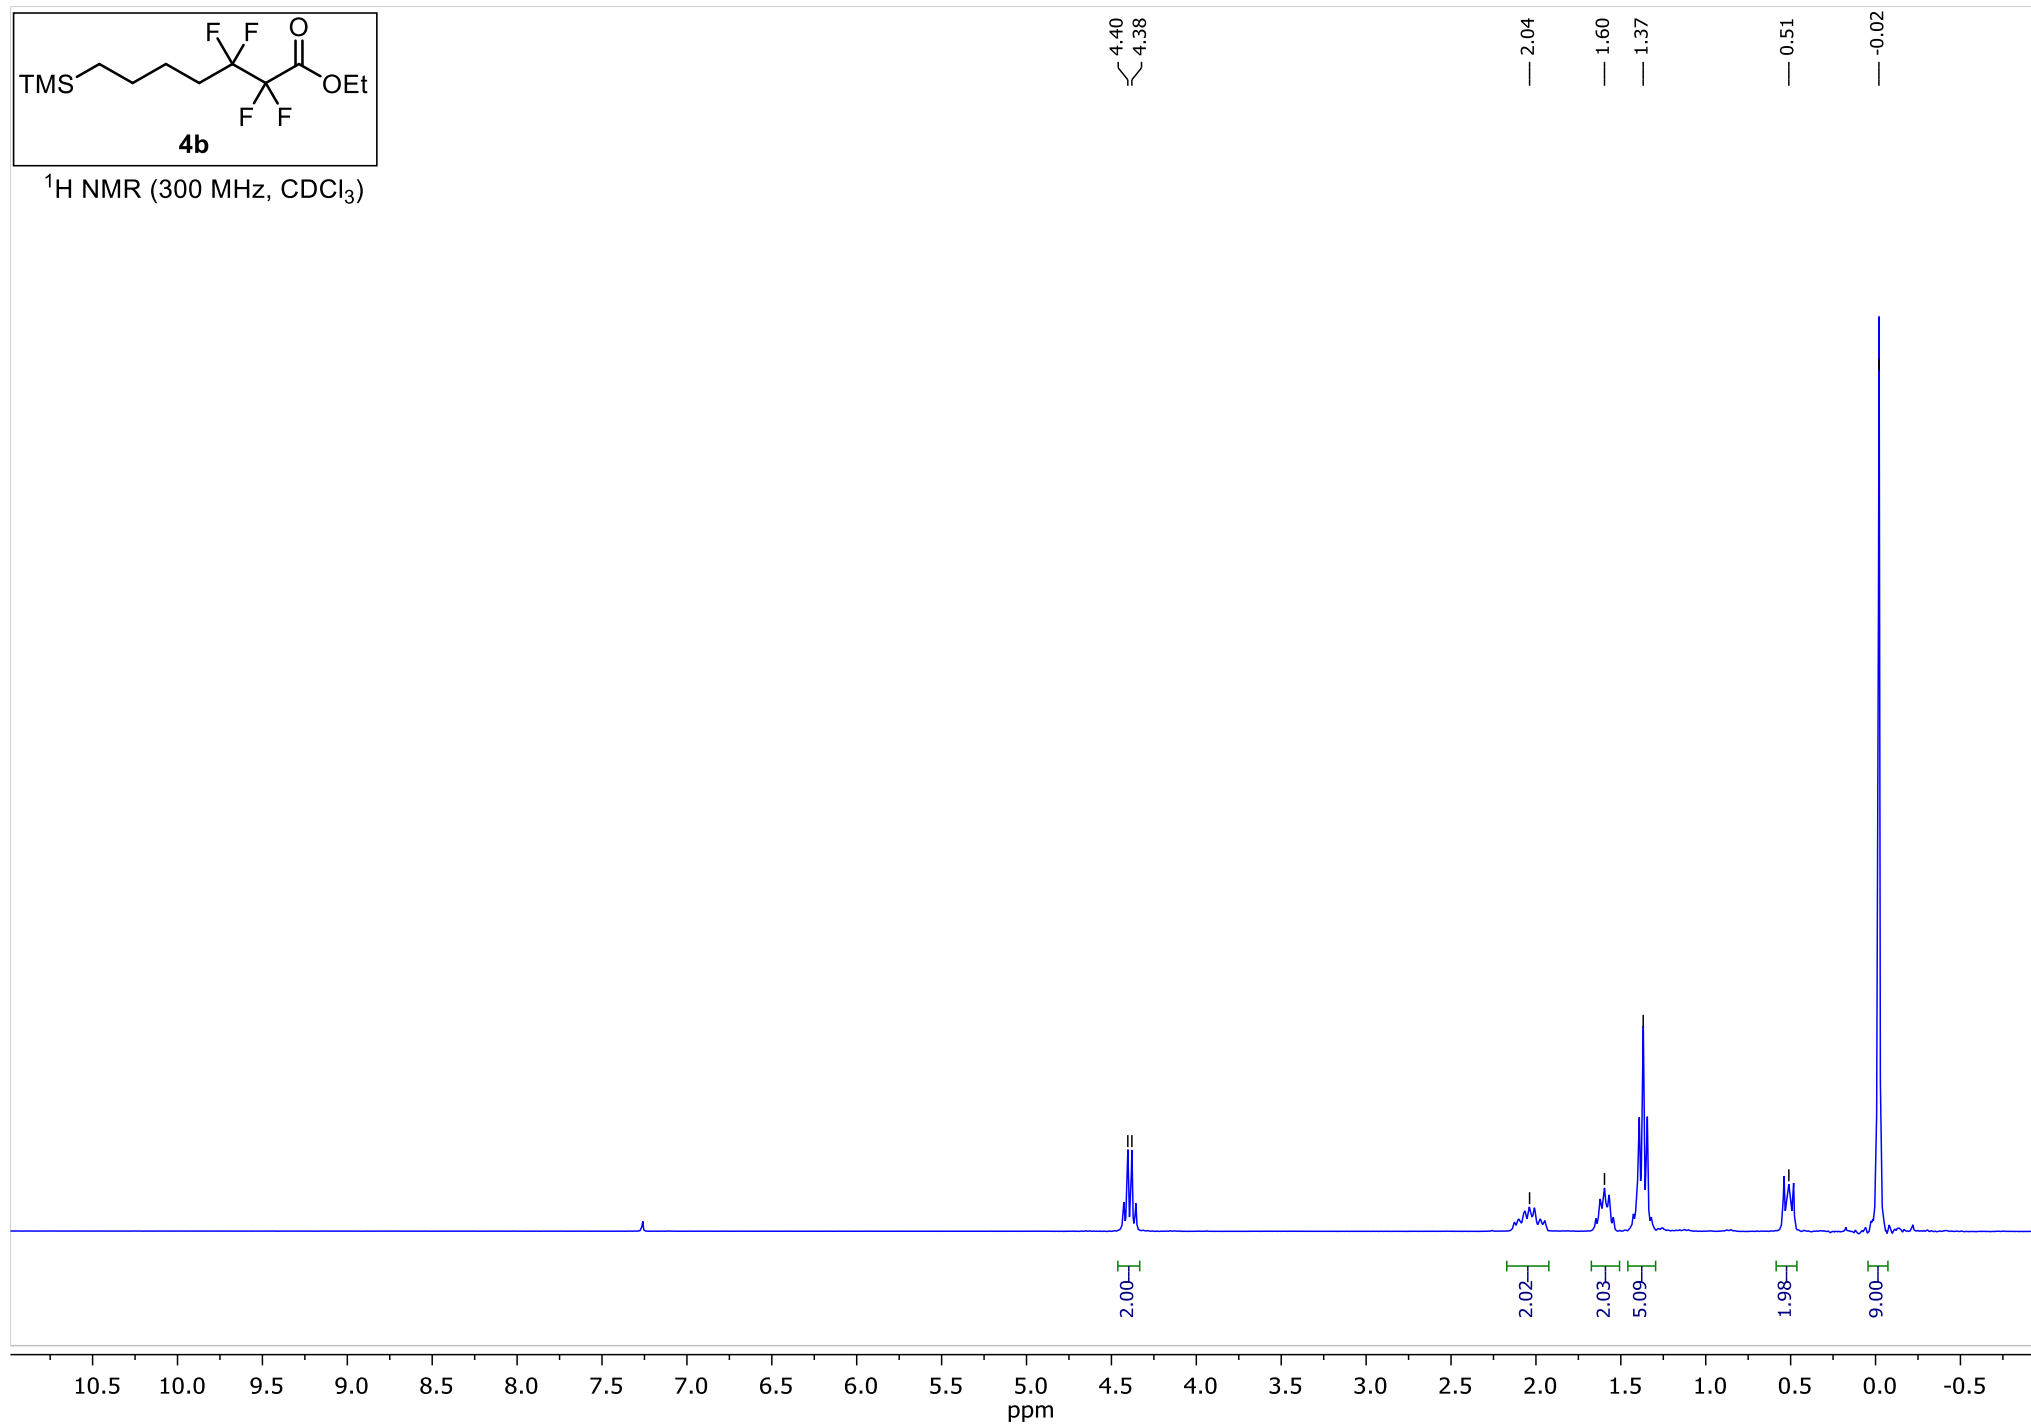

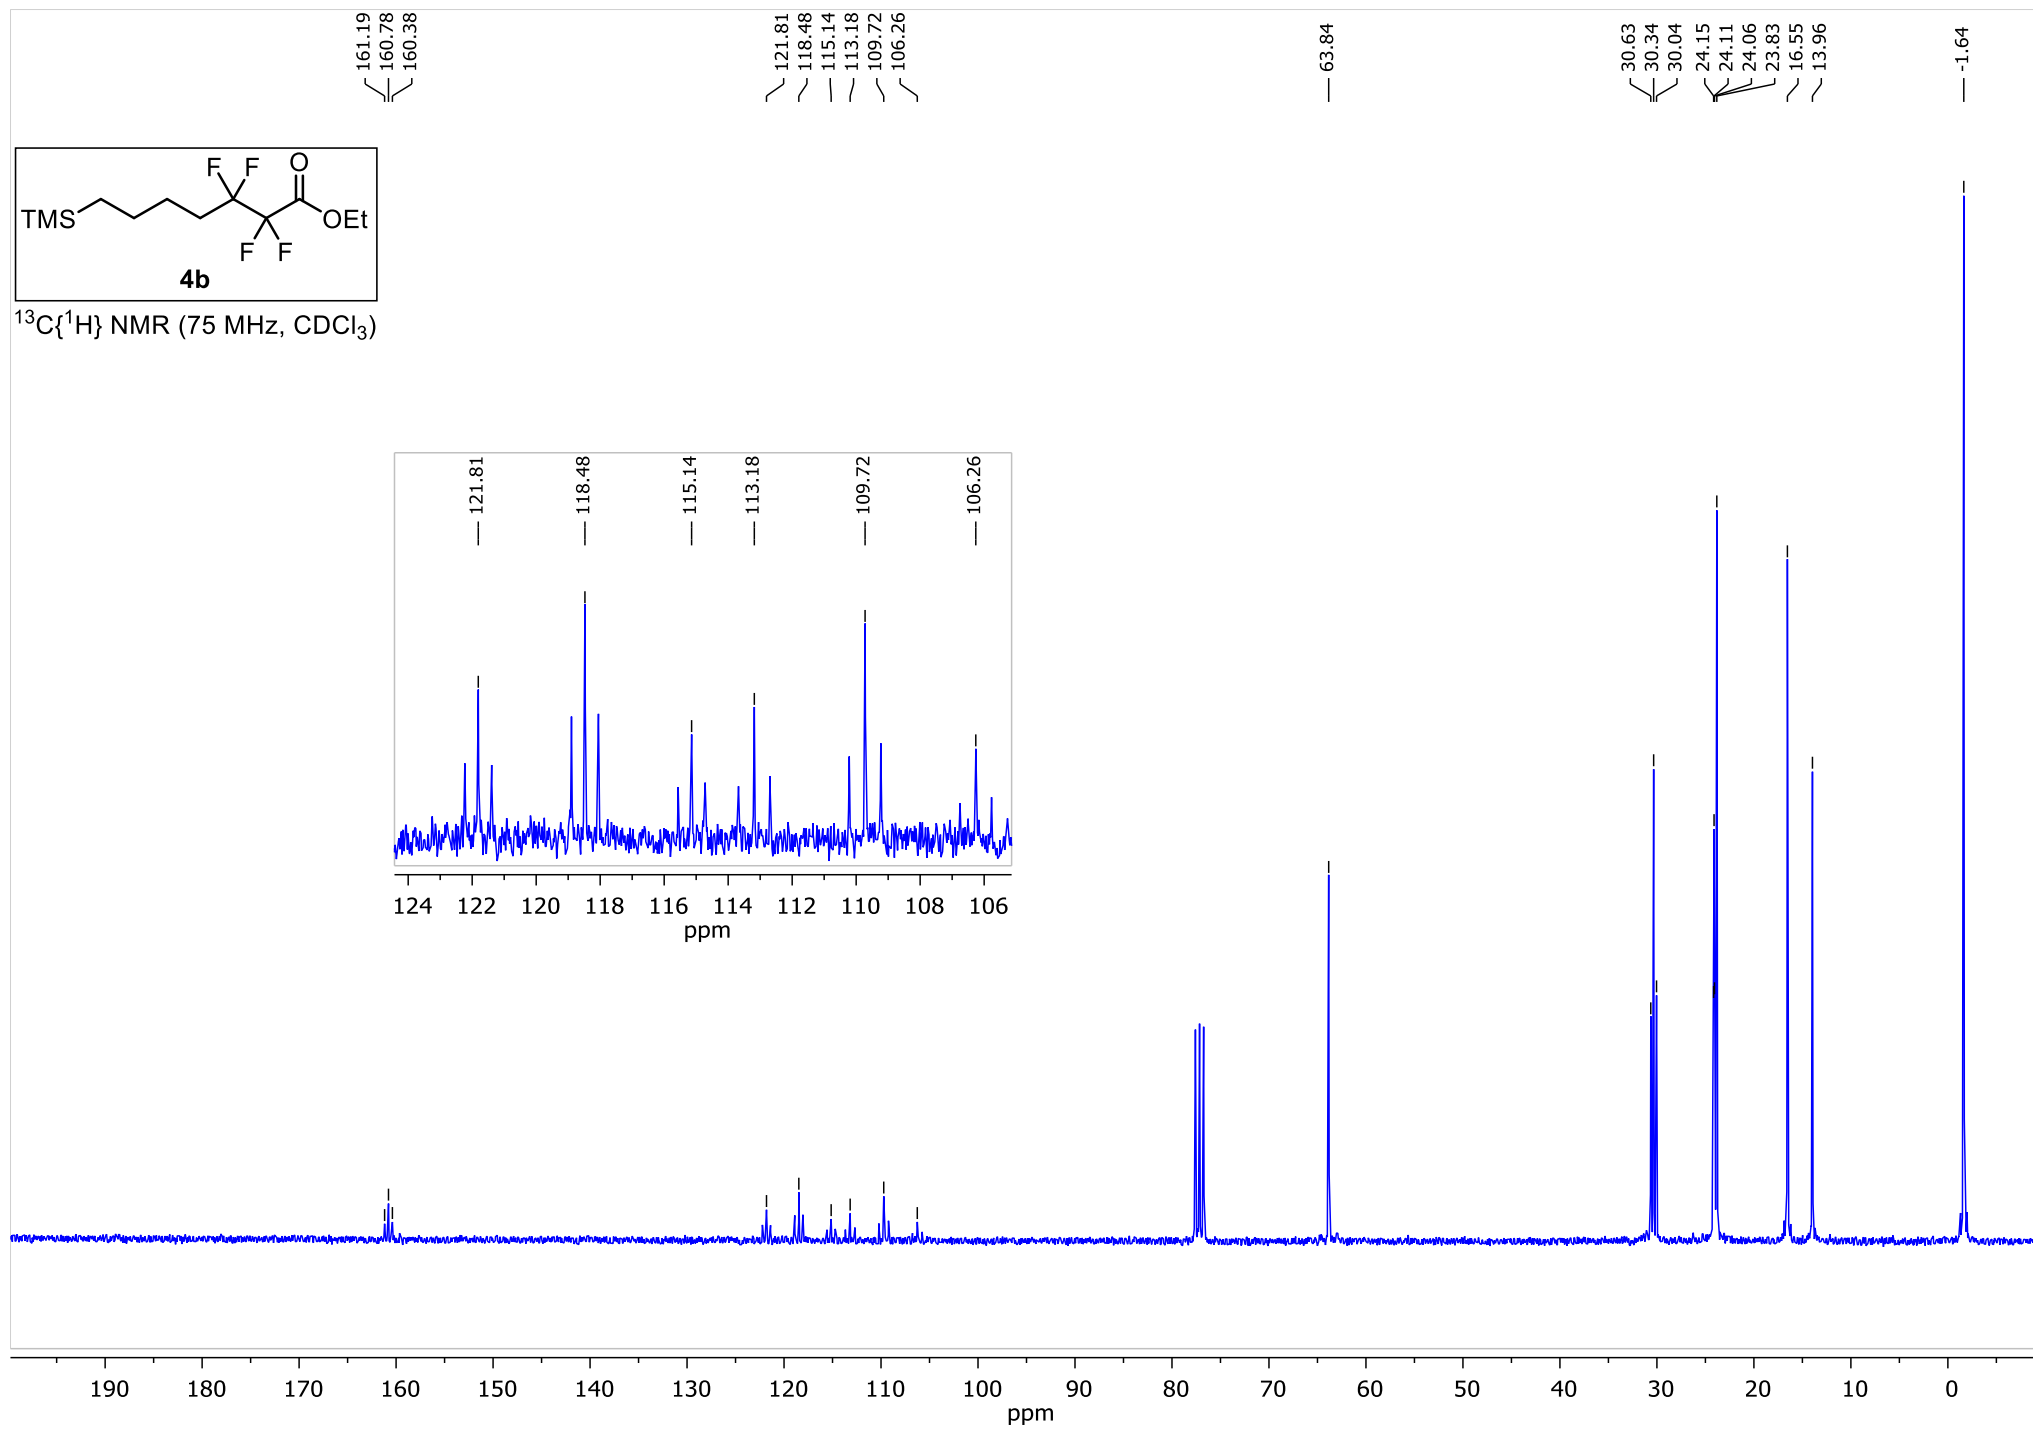



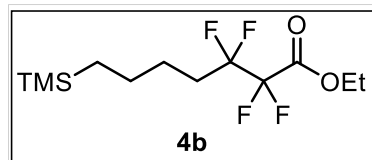

$^{19}\text{F}$  NMR (282 MHz,  $\text{CDCl}_3$ )

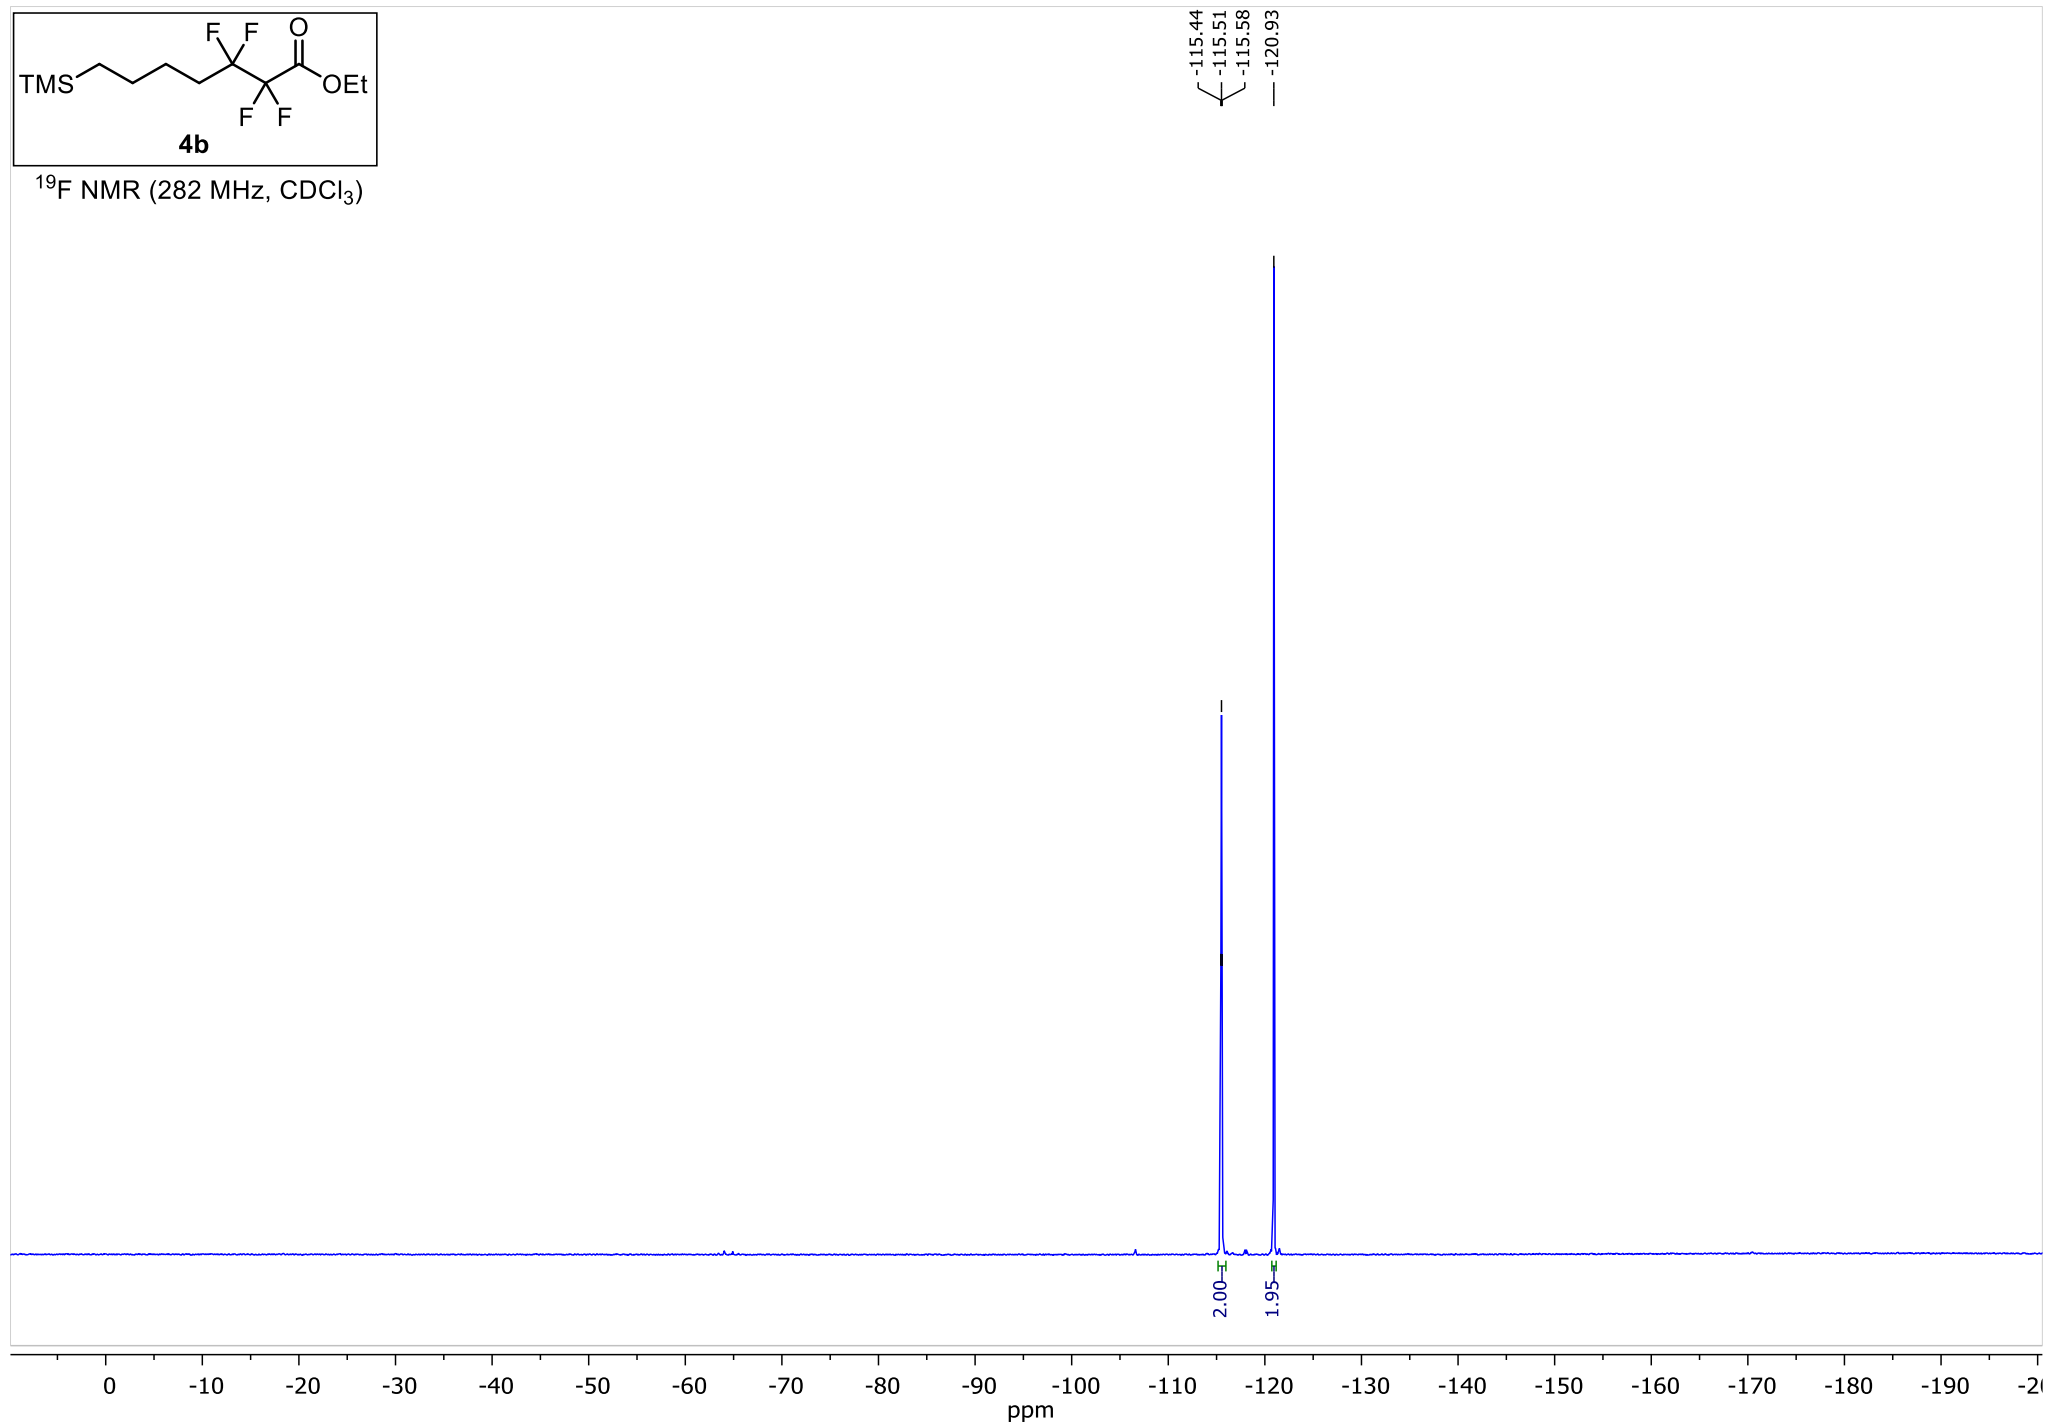

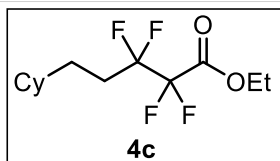

<sup>1</sup>H NMR (300 MHz, CDCl<sub>3</sub>)

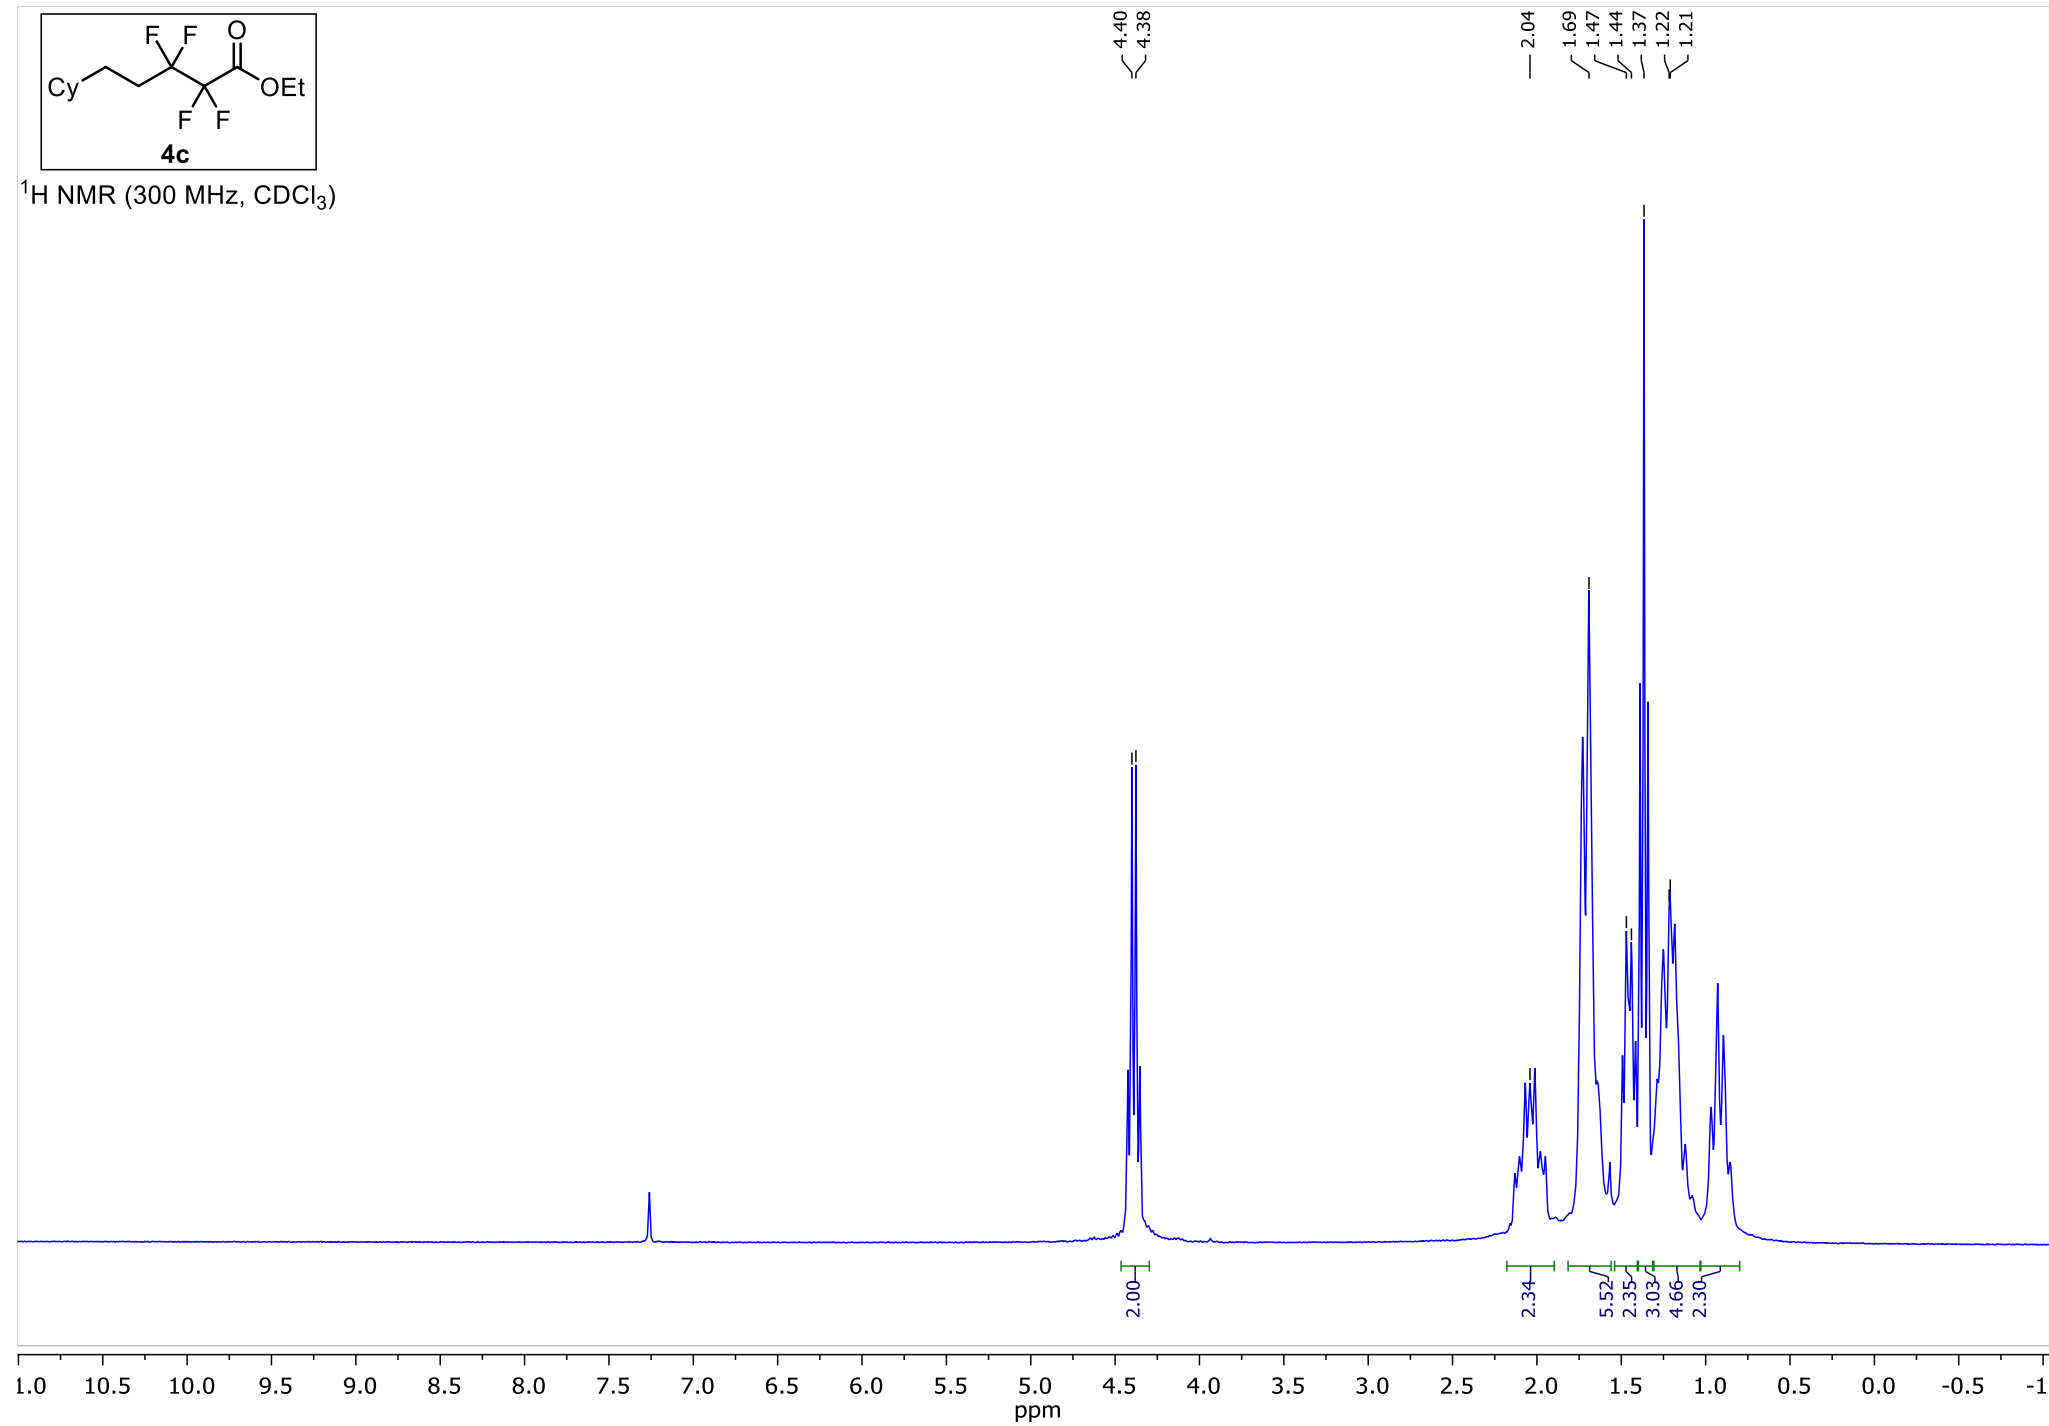

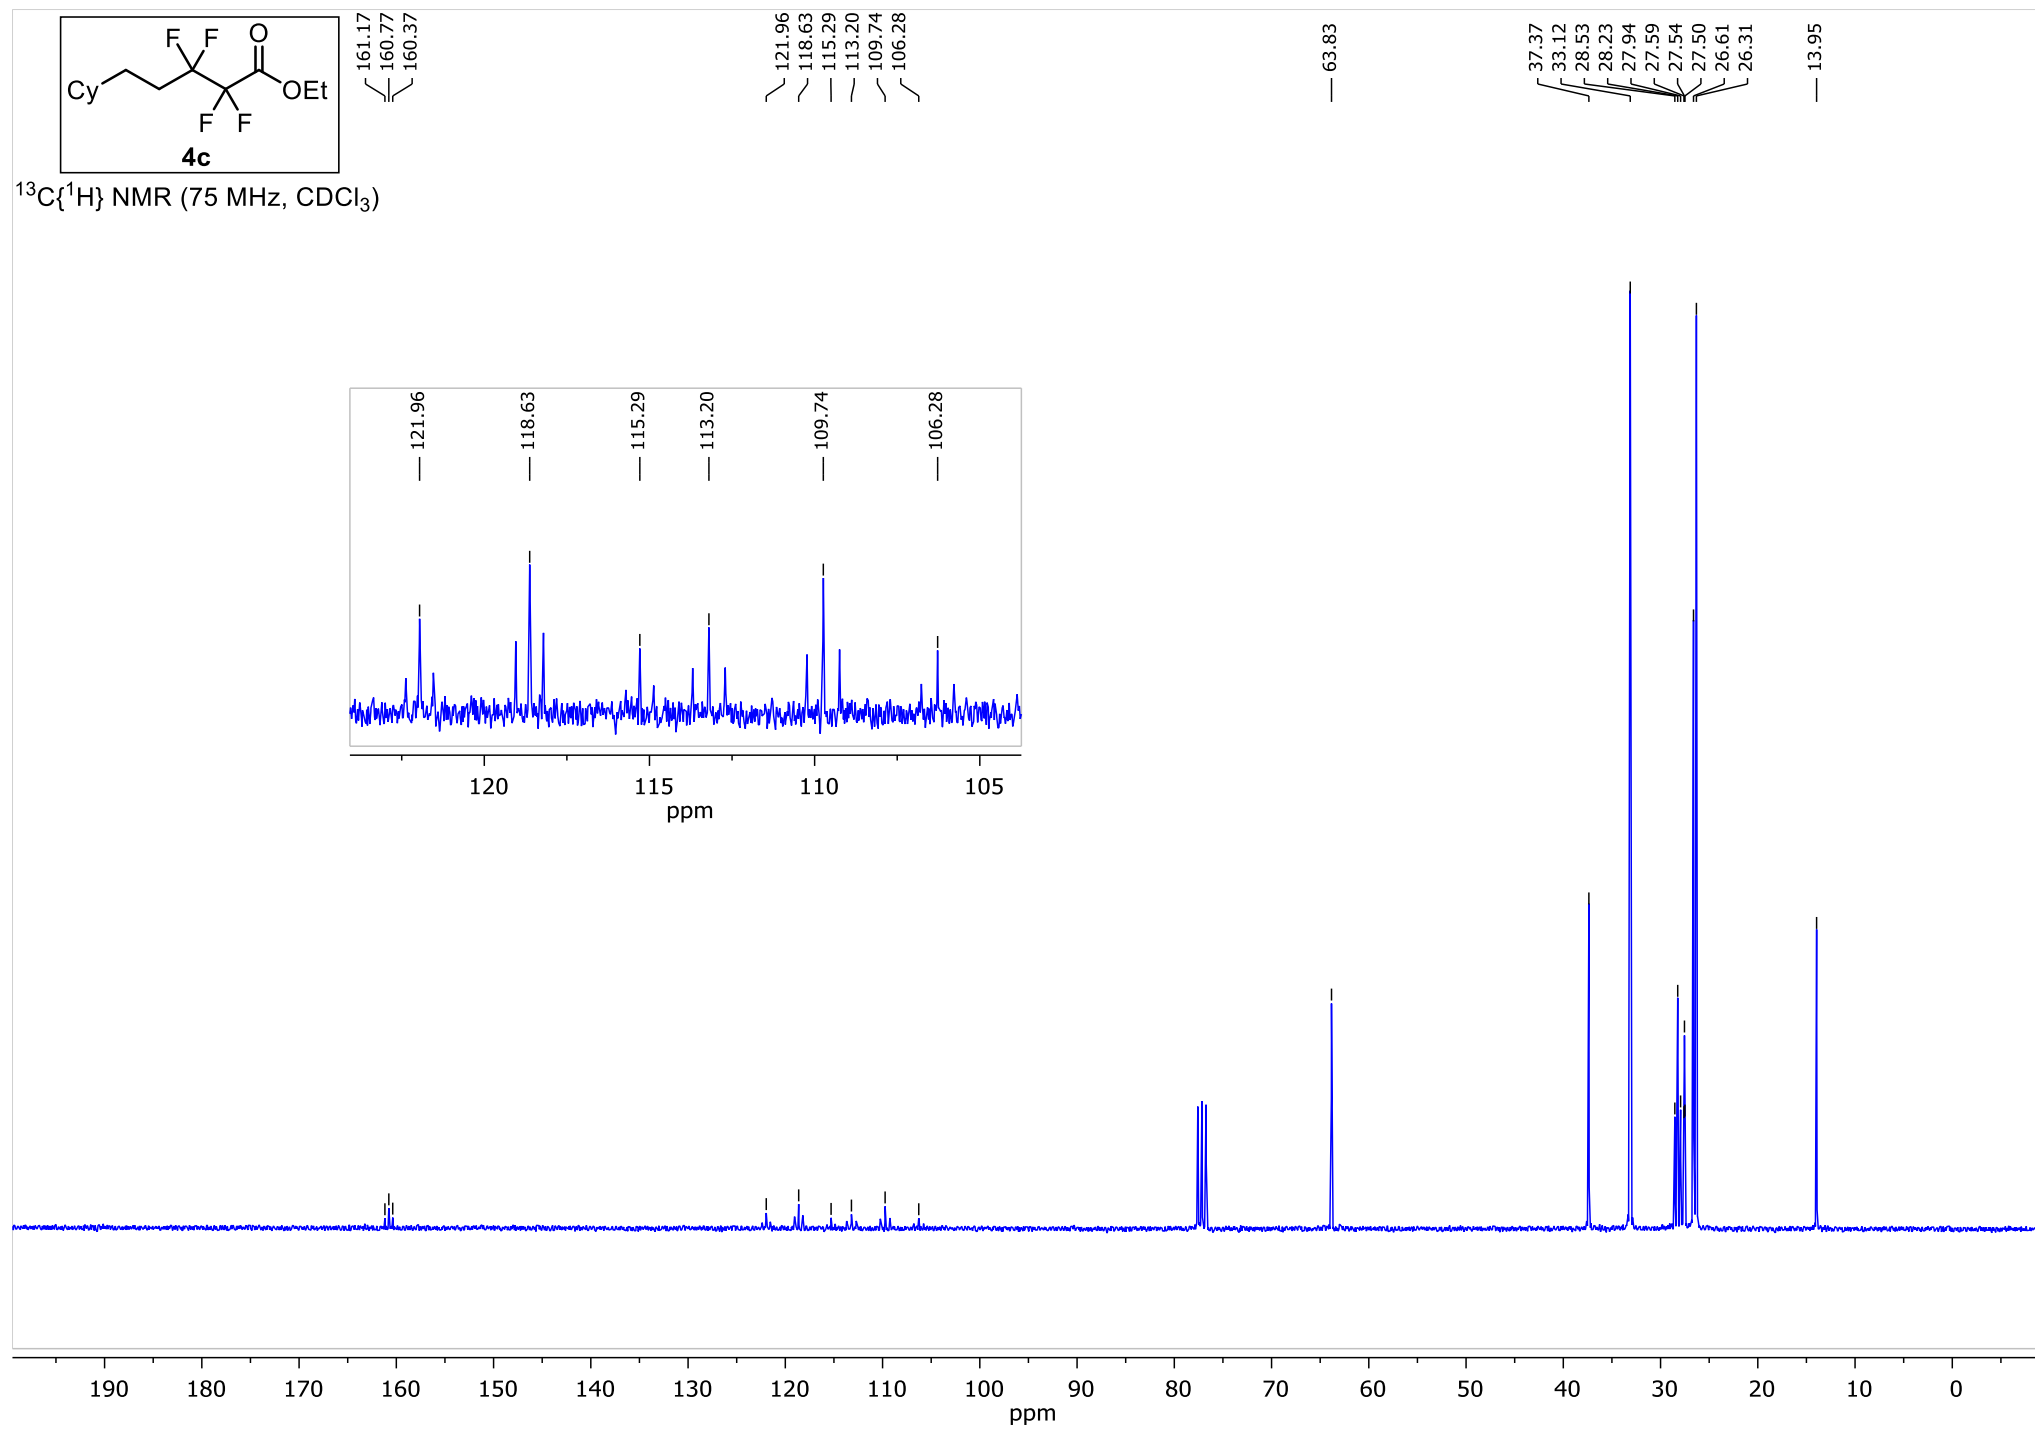

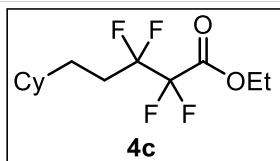

$^{19}\text{F}$  NMR (282 MHz,  $\text{CDCl}_3$ )

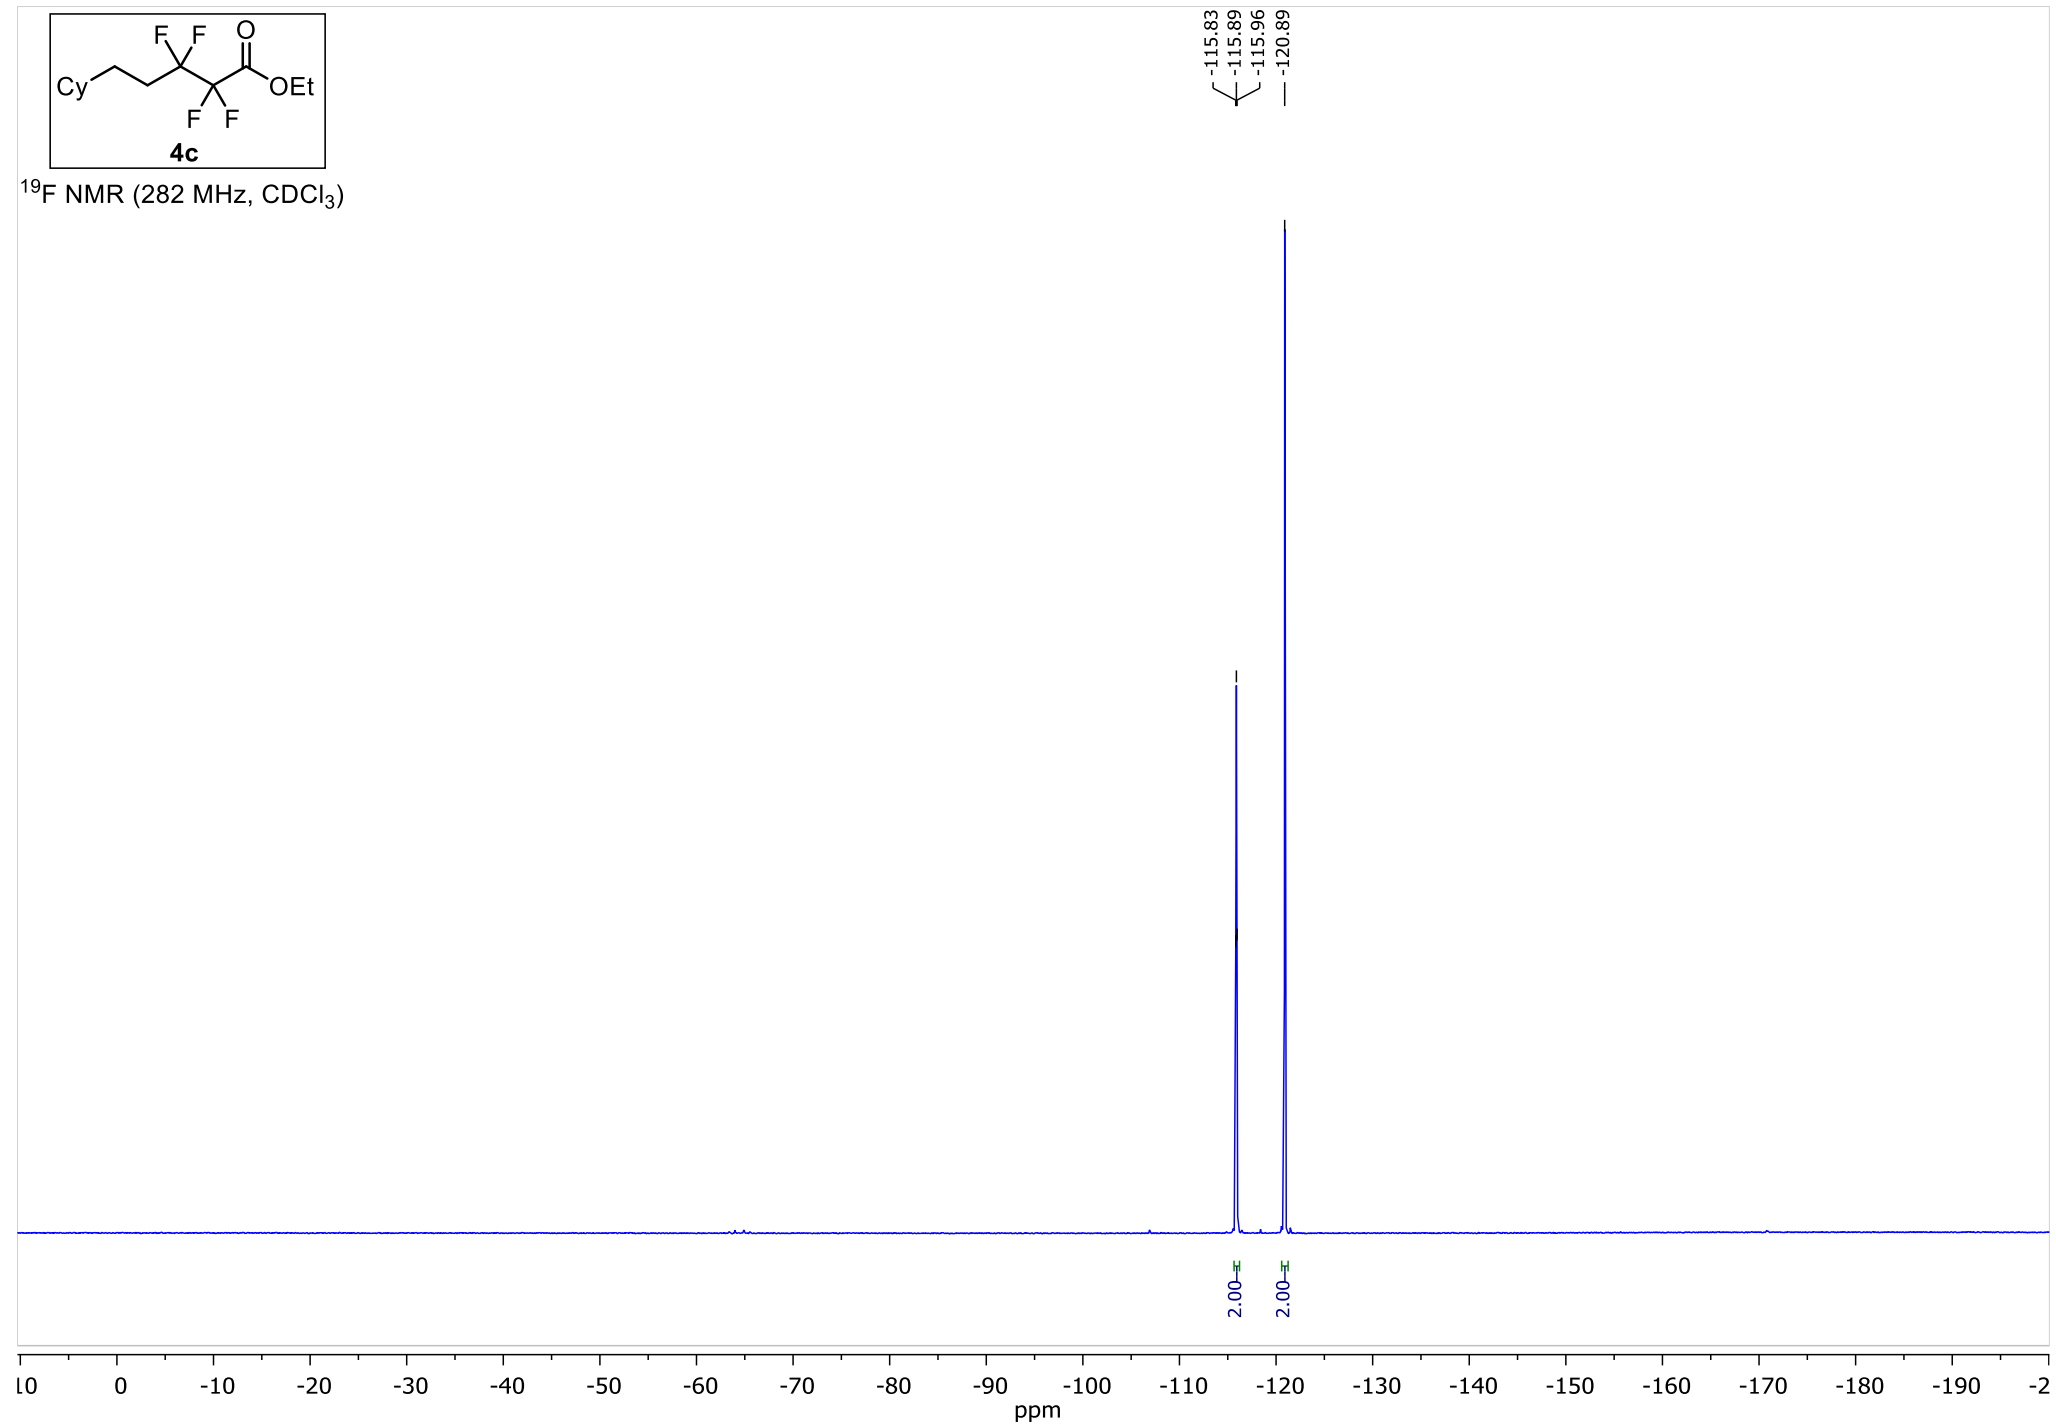

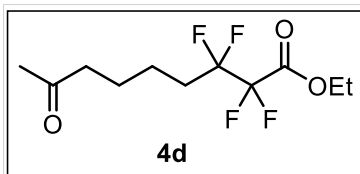

$^1\text{H NMR}$  (300 MHz,  $\text{CDCl}_3$ )

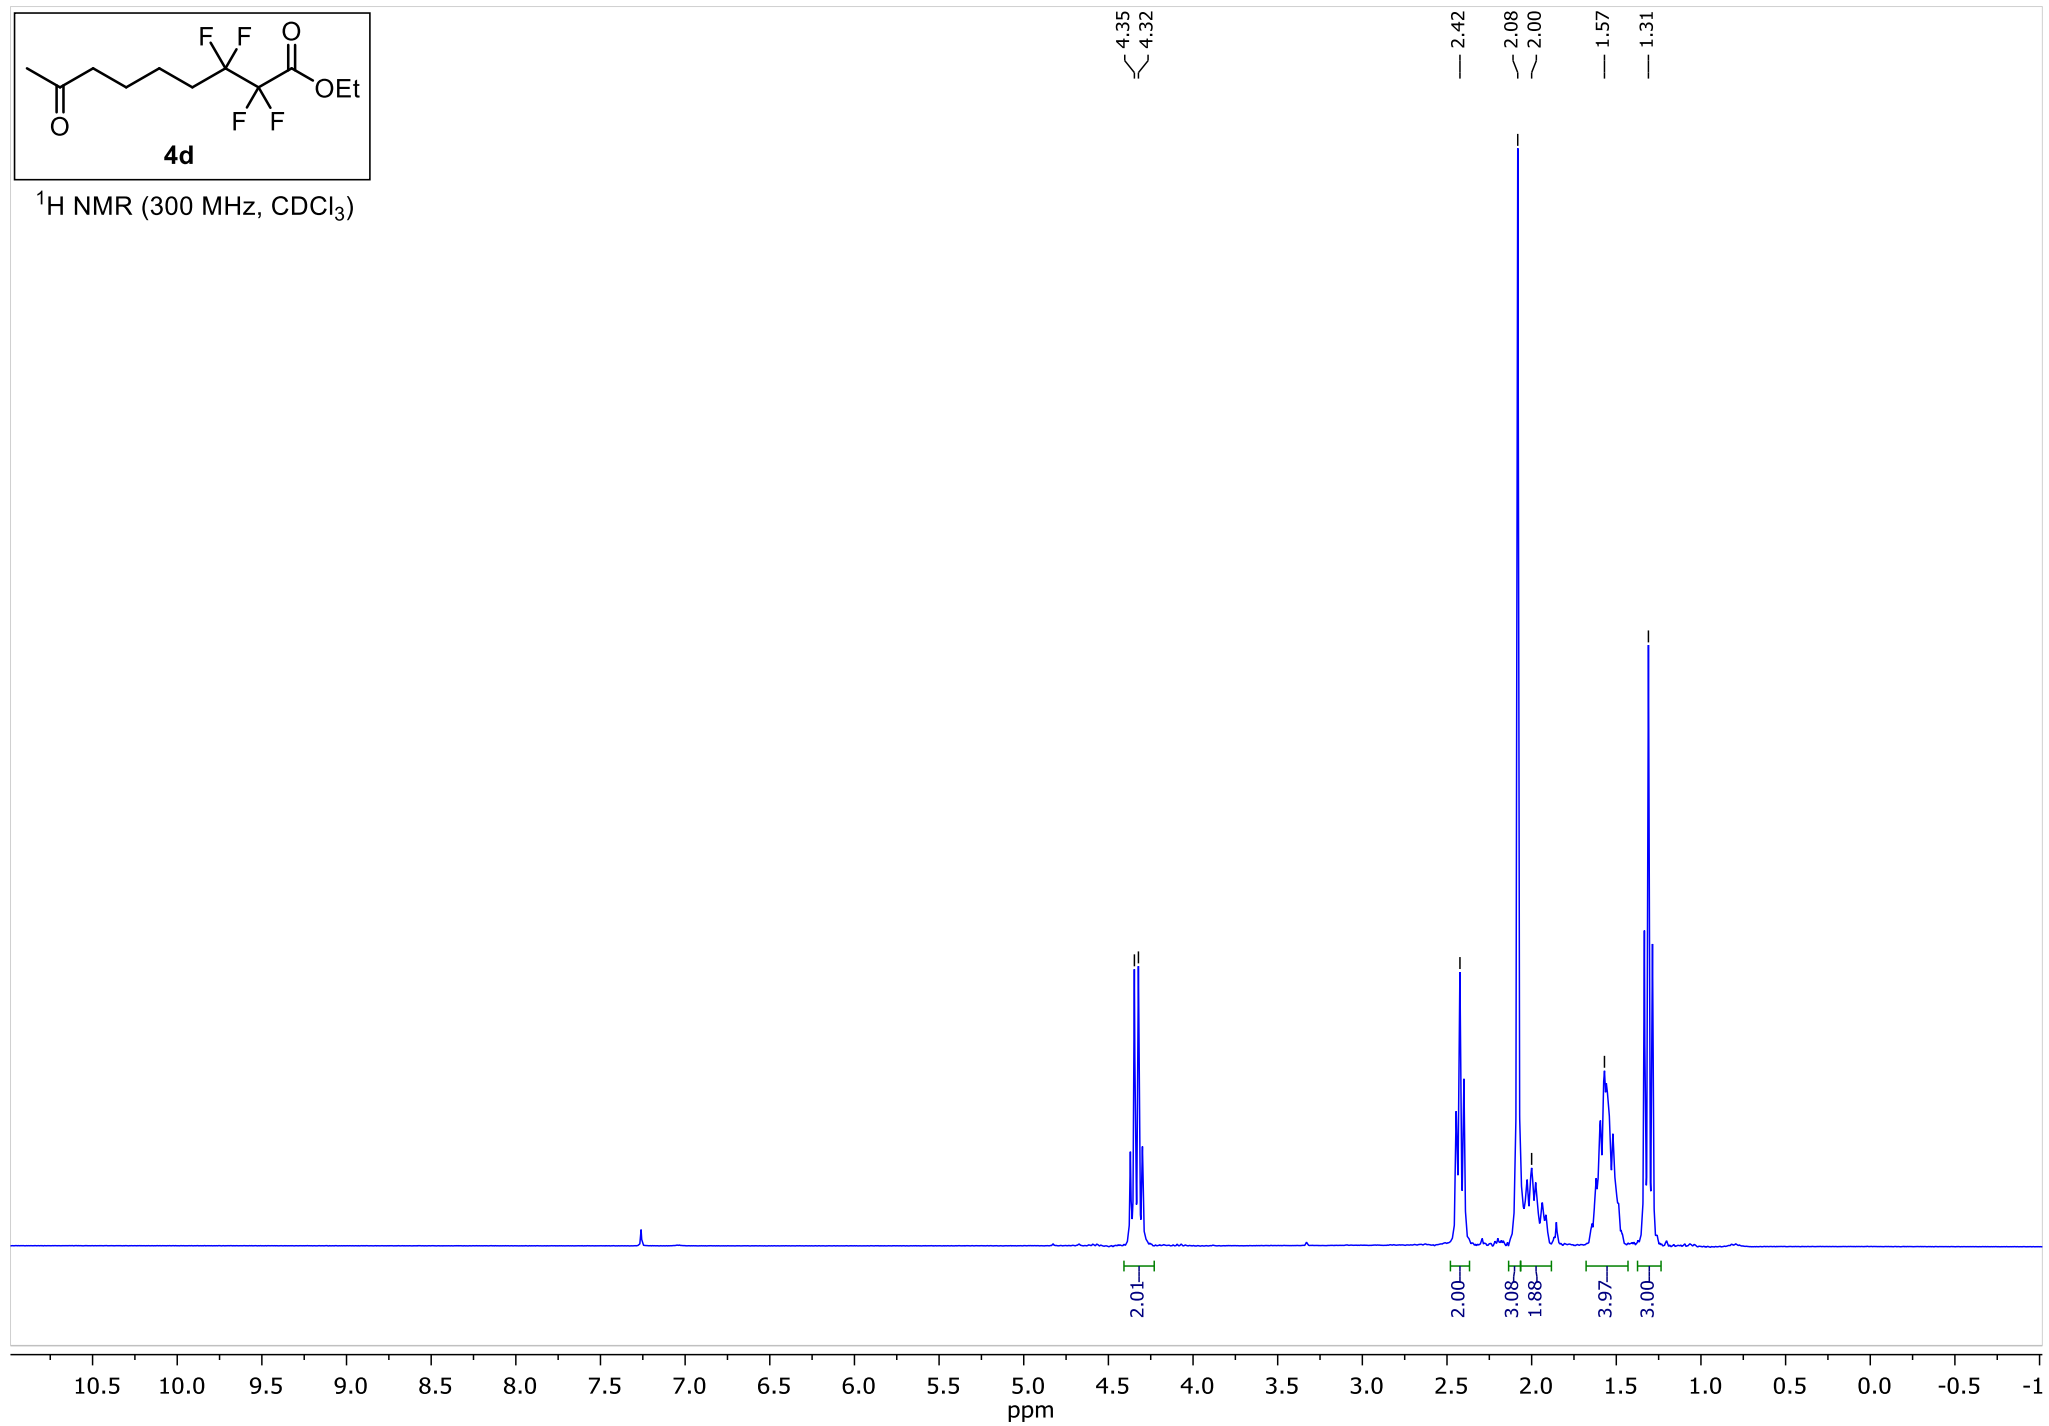

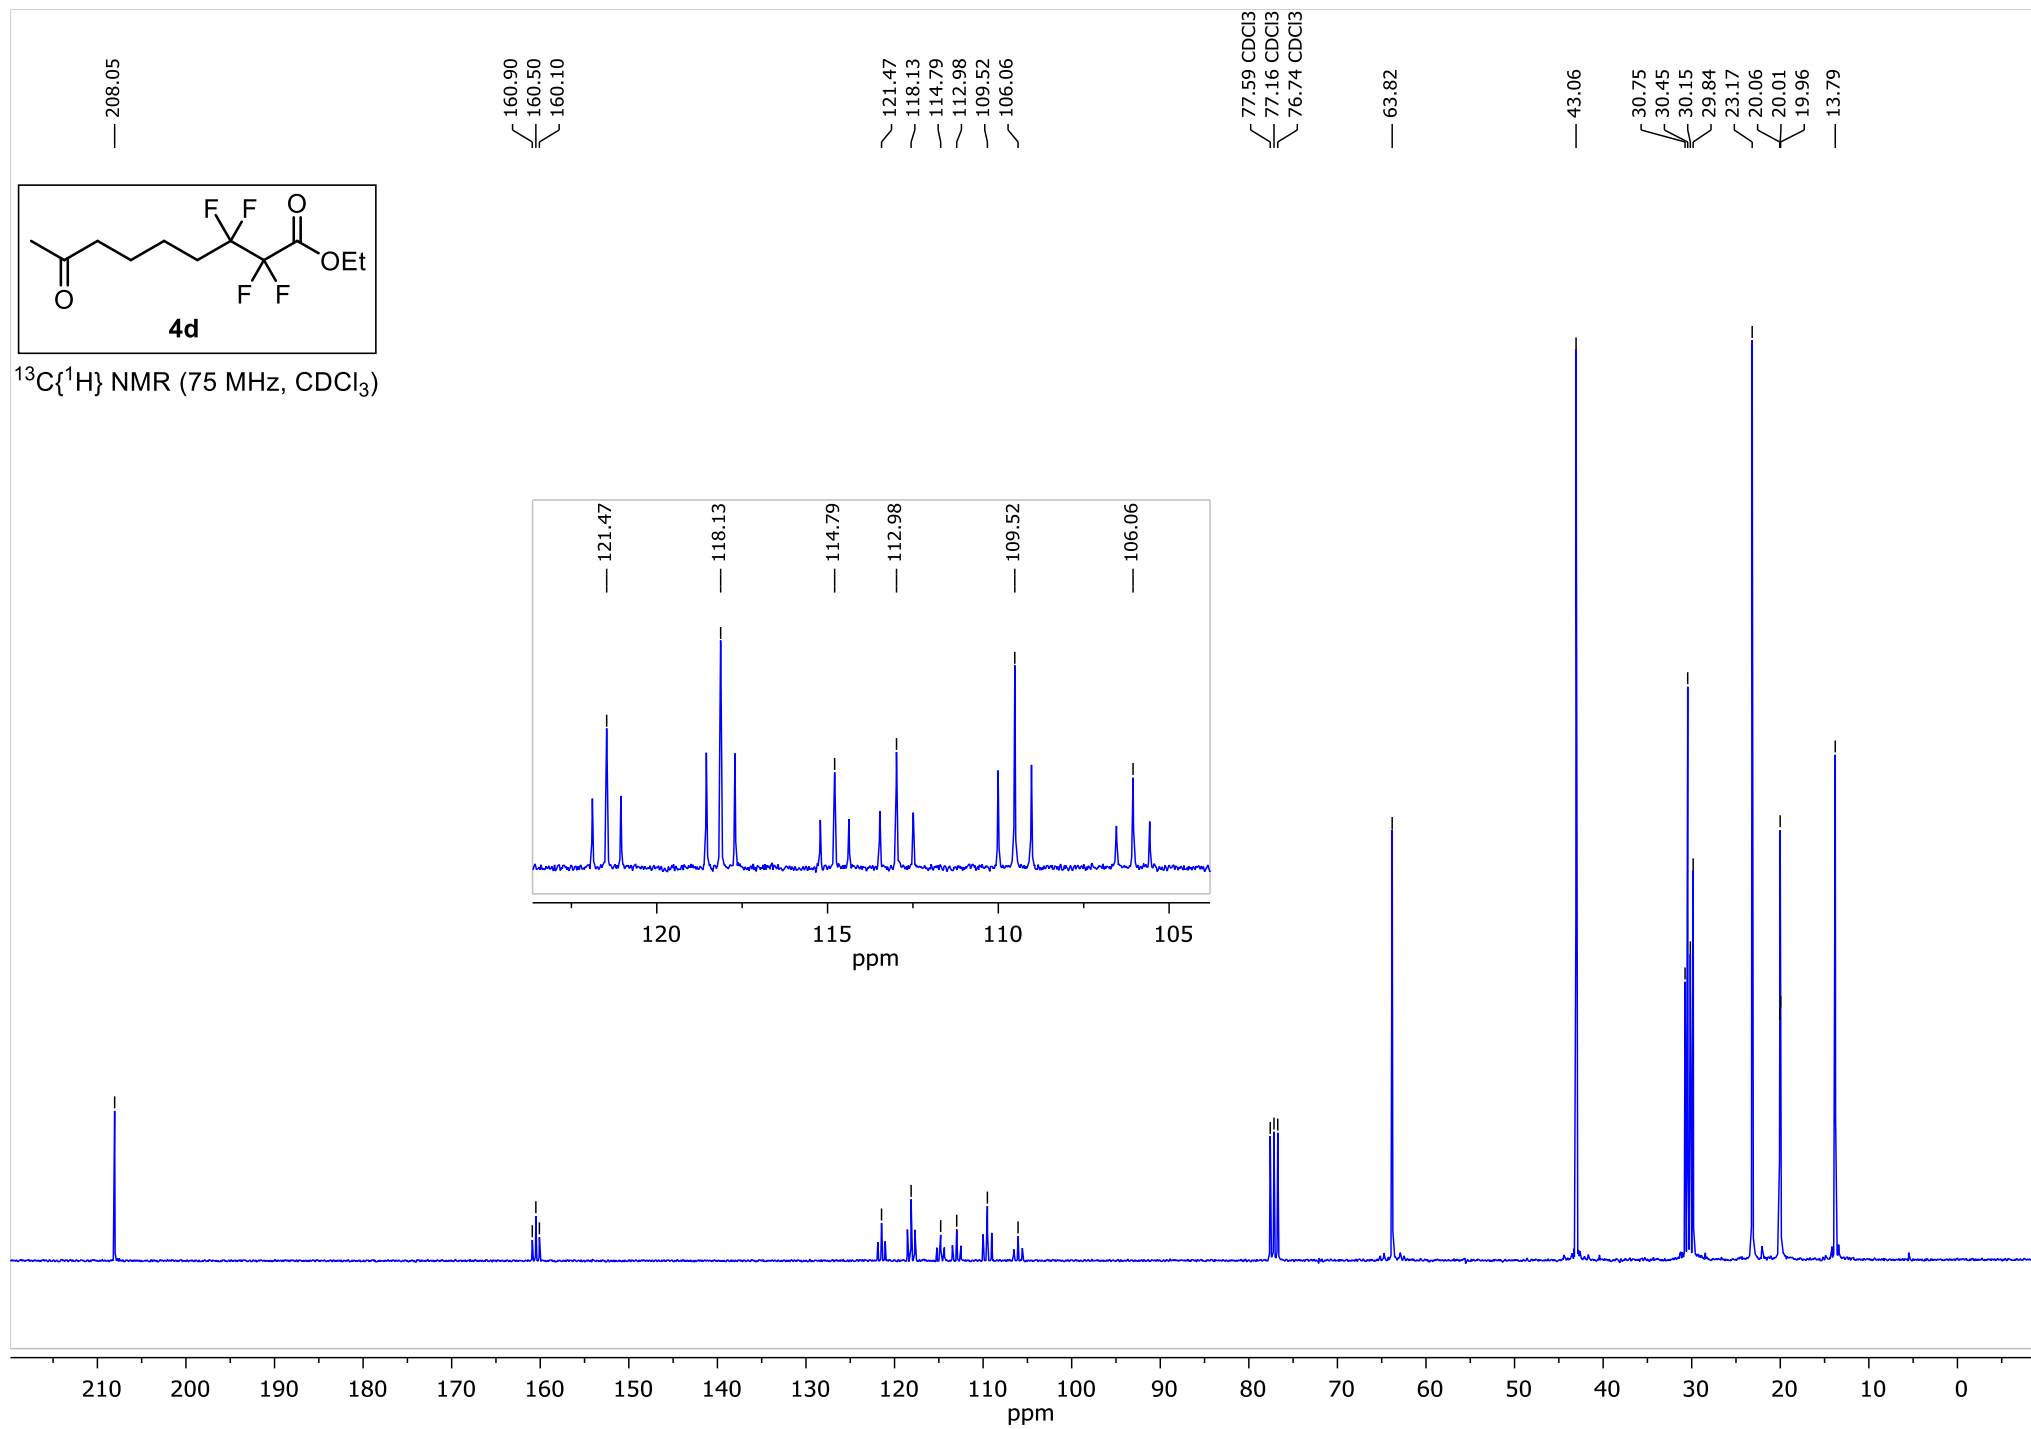

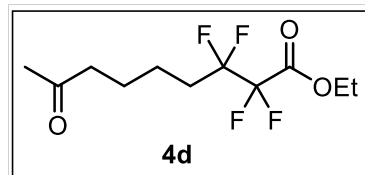

$^{19}\text{F}$  NMR (282 MHz,  $\text{CDCl}_3$ )

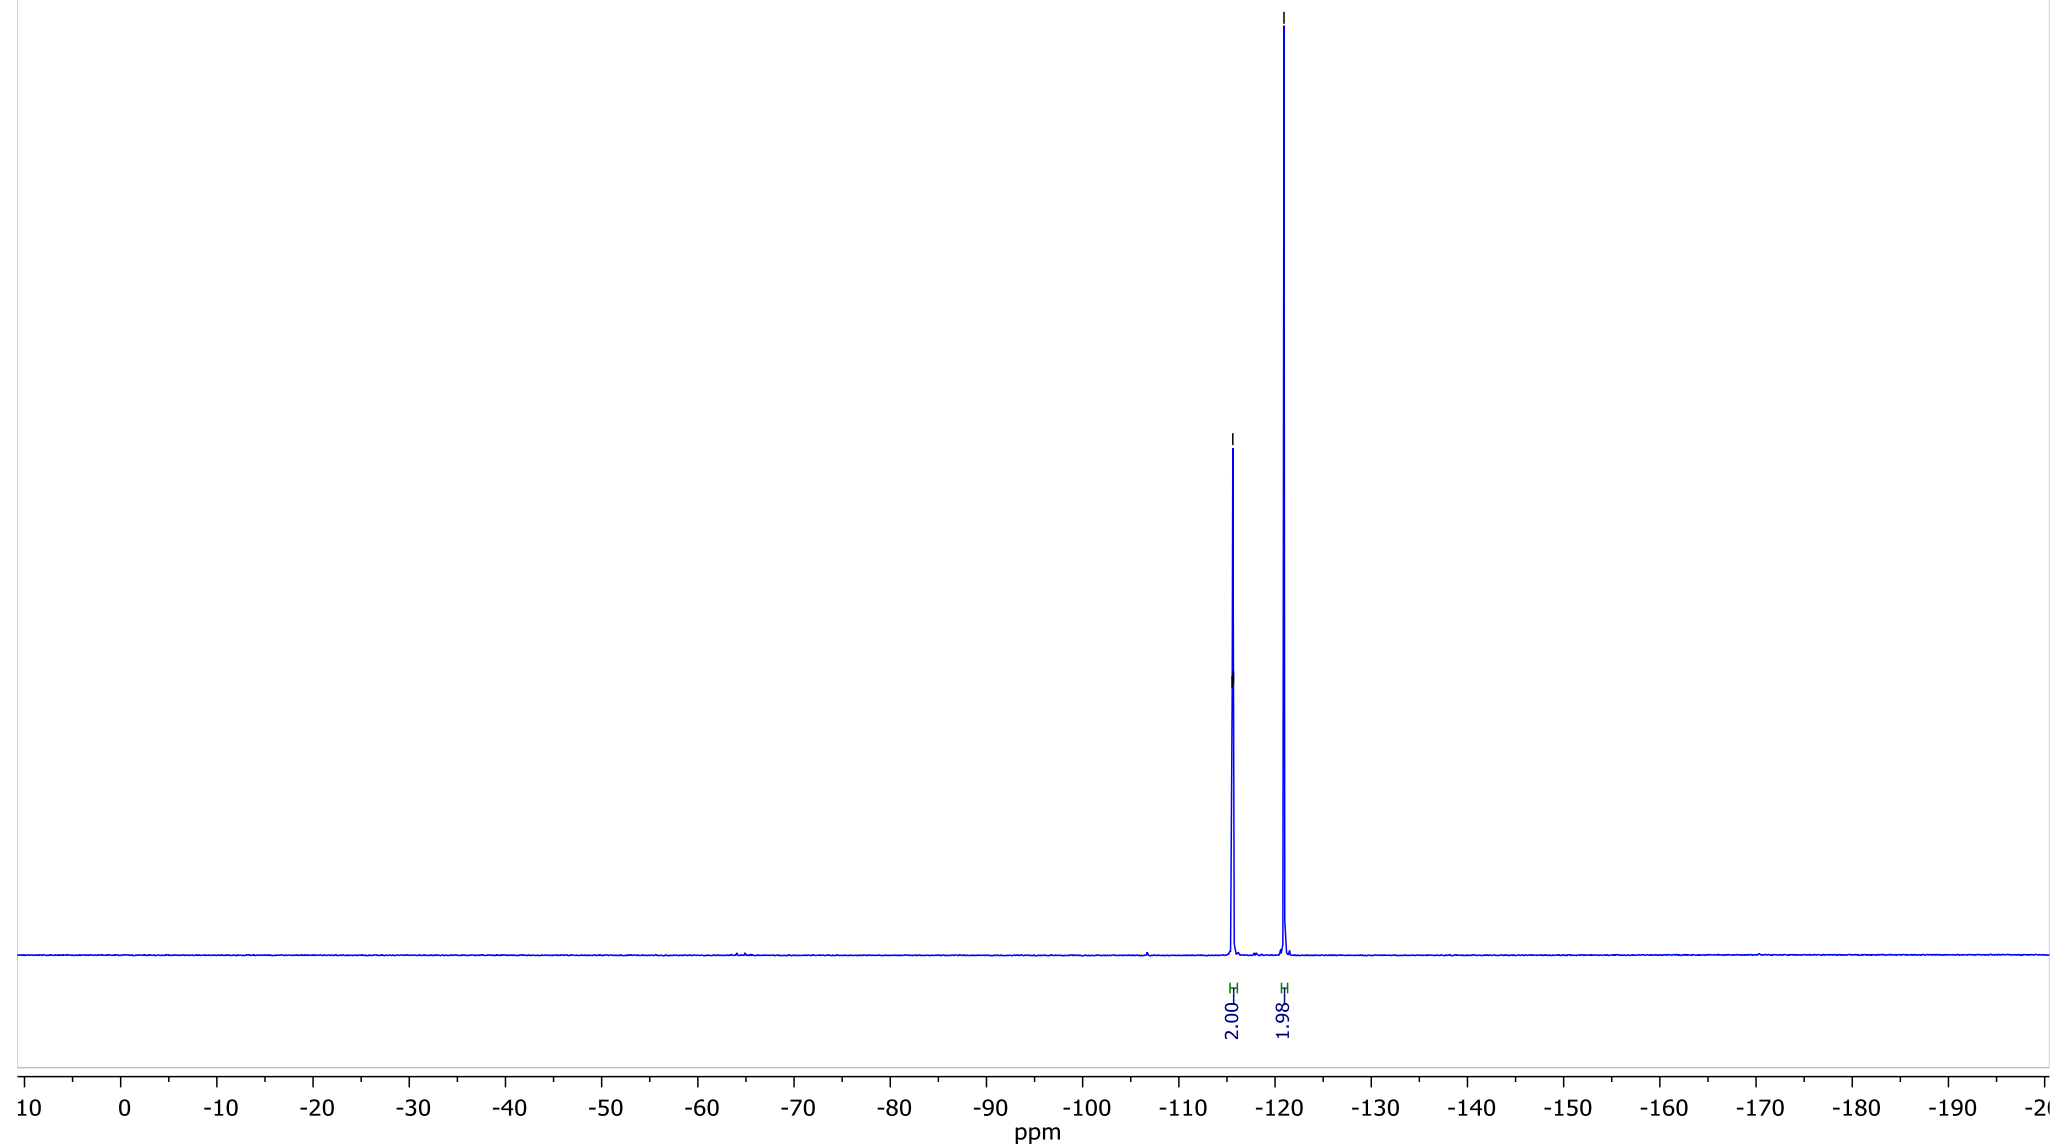

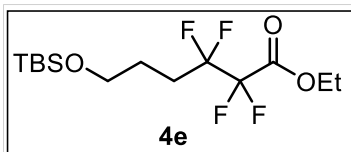

$^1\text{H NMR}$  (300 MHz,  $\text{CDCl}_3$ )

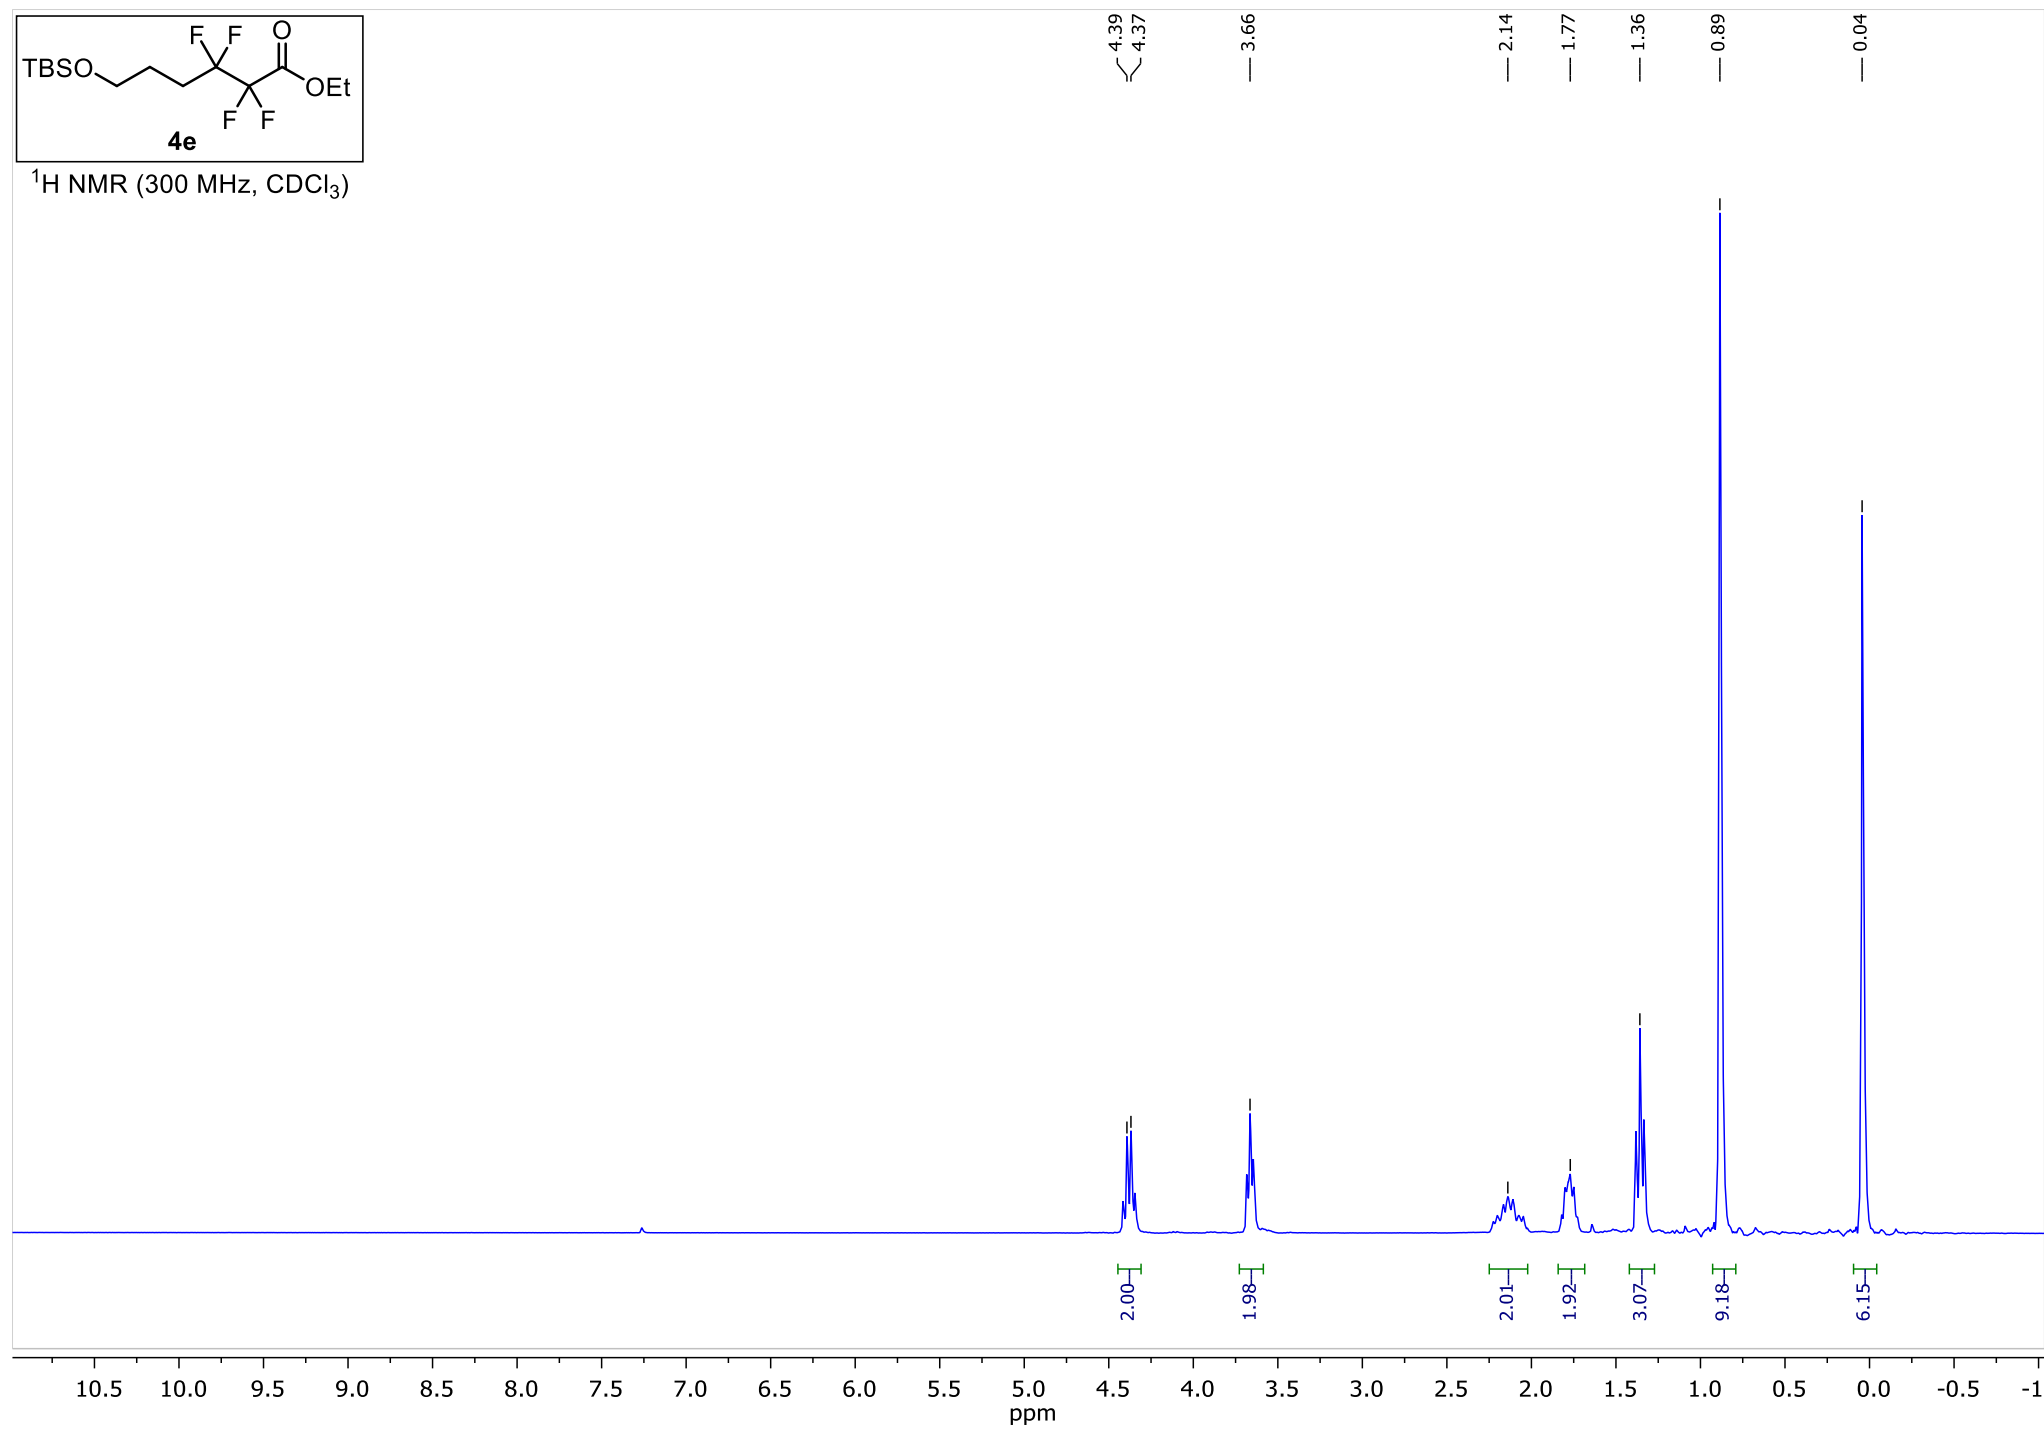



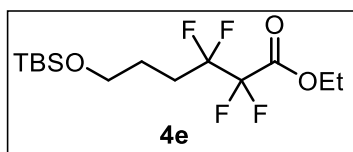

$^{13}\text{C}\{^1\text{H}\}$  NMR (75 MHz,  $\text{CDCl}_3$ )

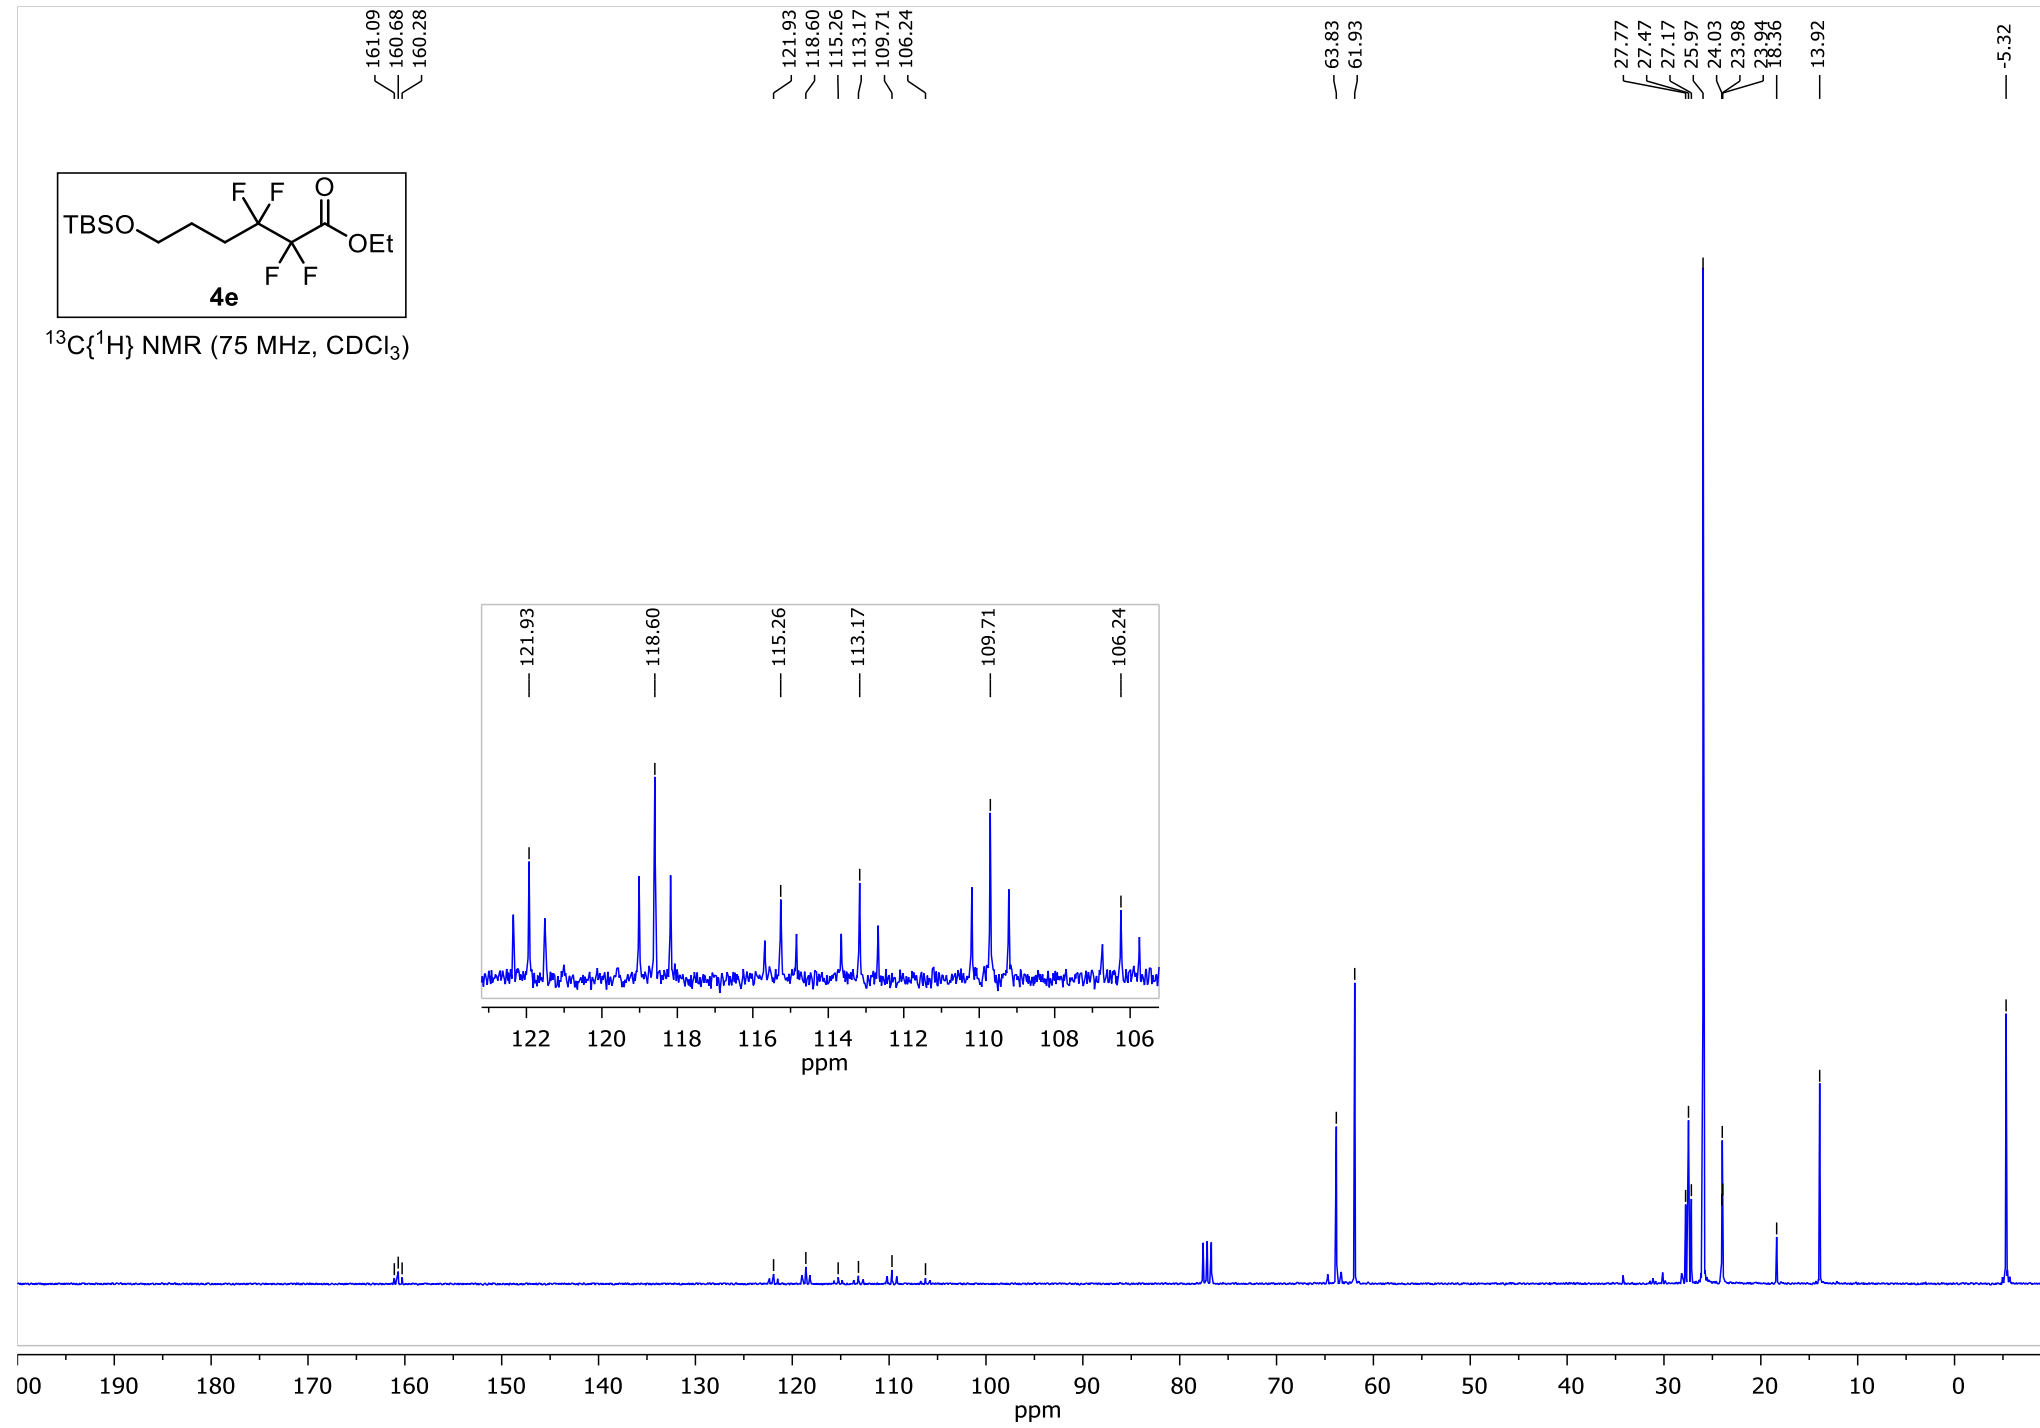

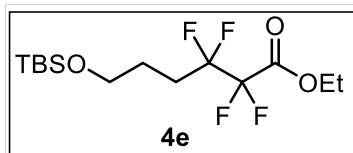

$^{19}\text{F}$  NMR (282 MHz,  $\text{CDCl}_3$ )

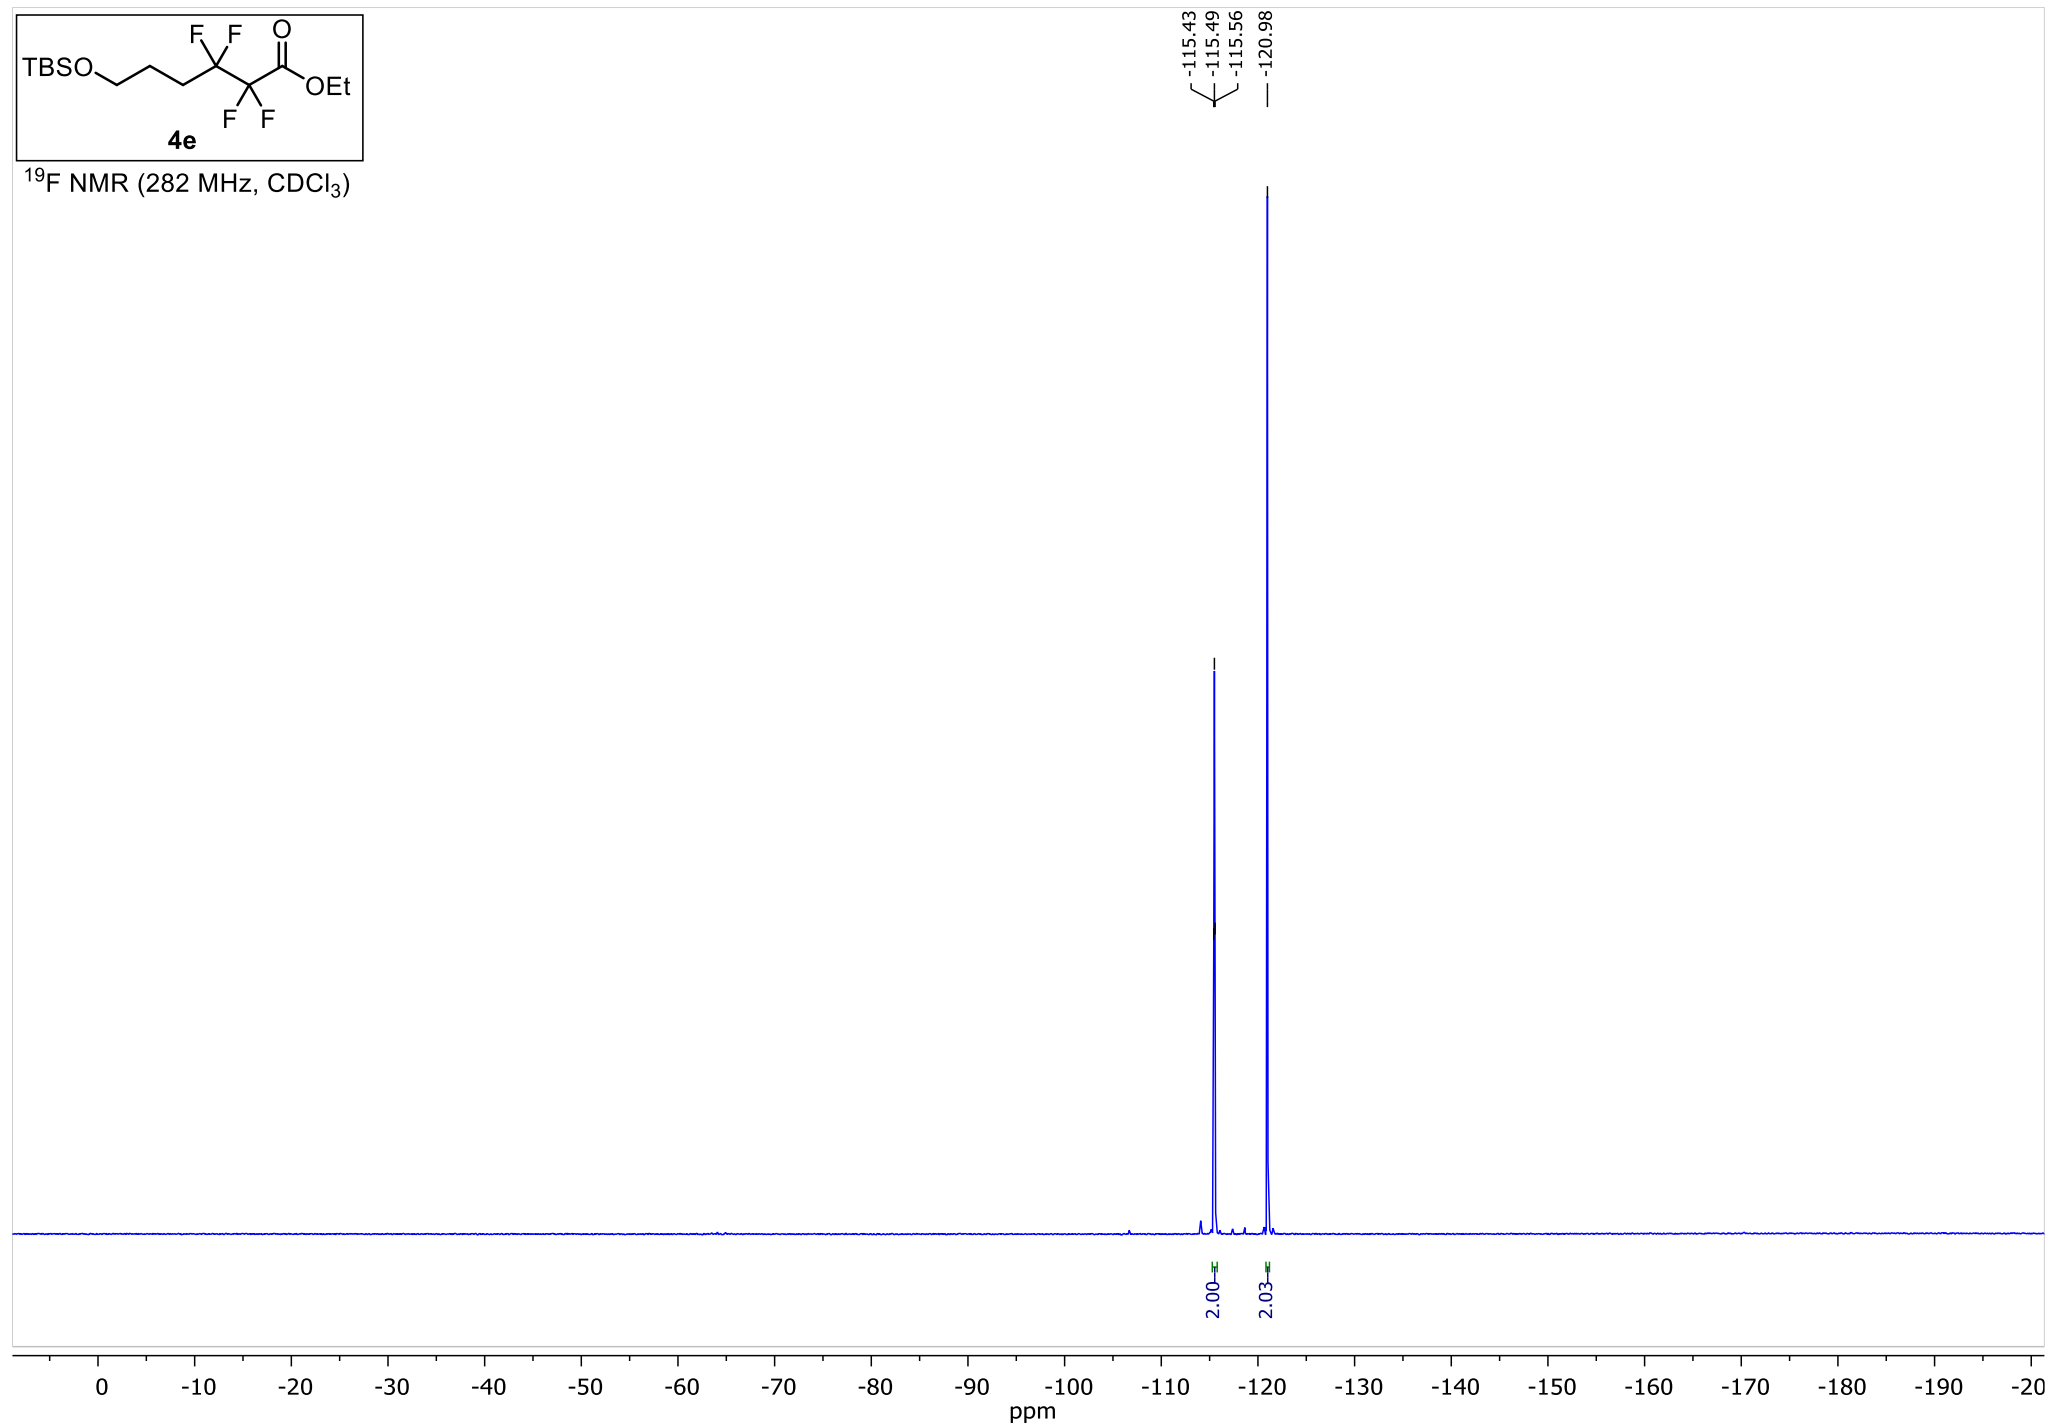

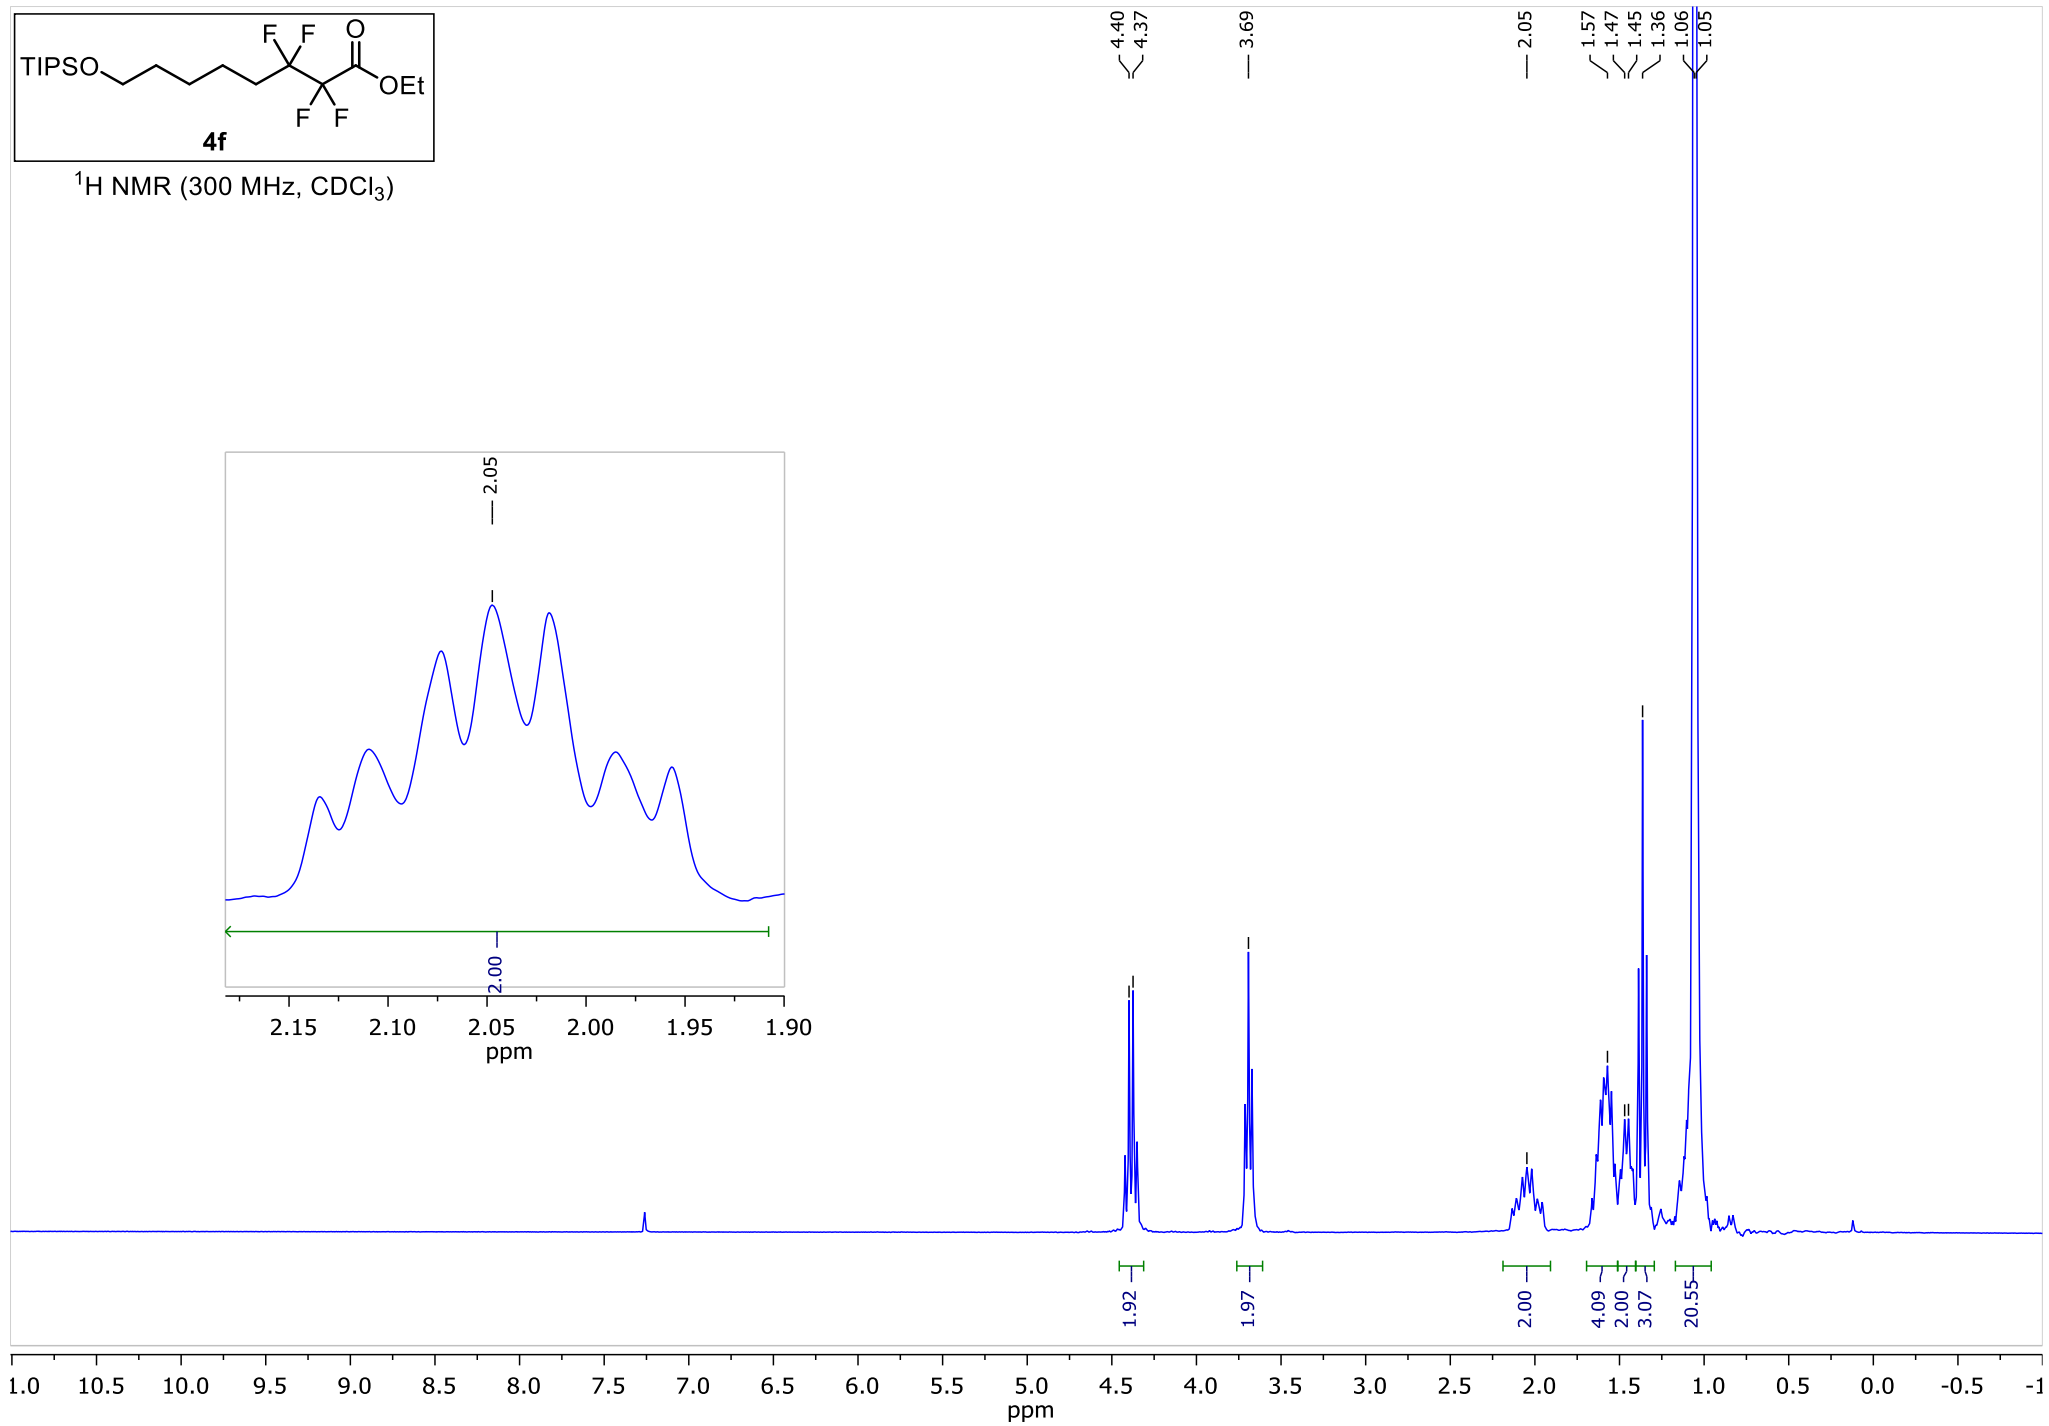

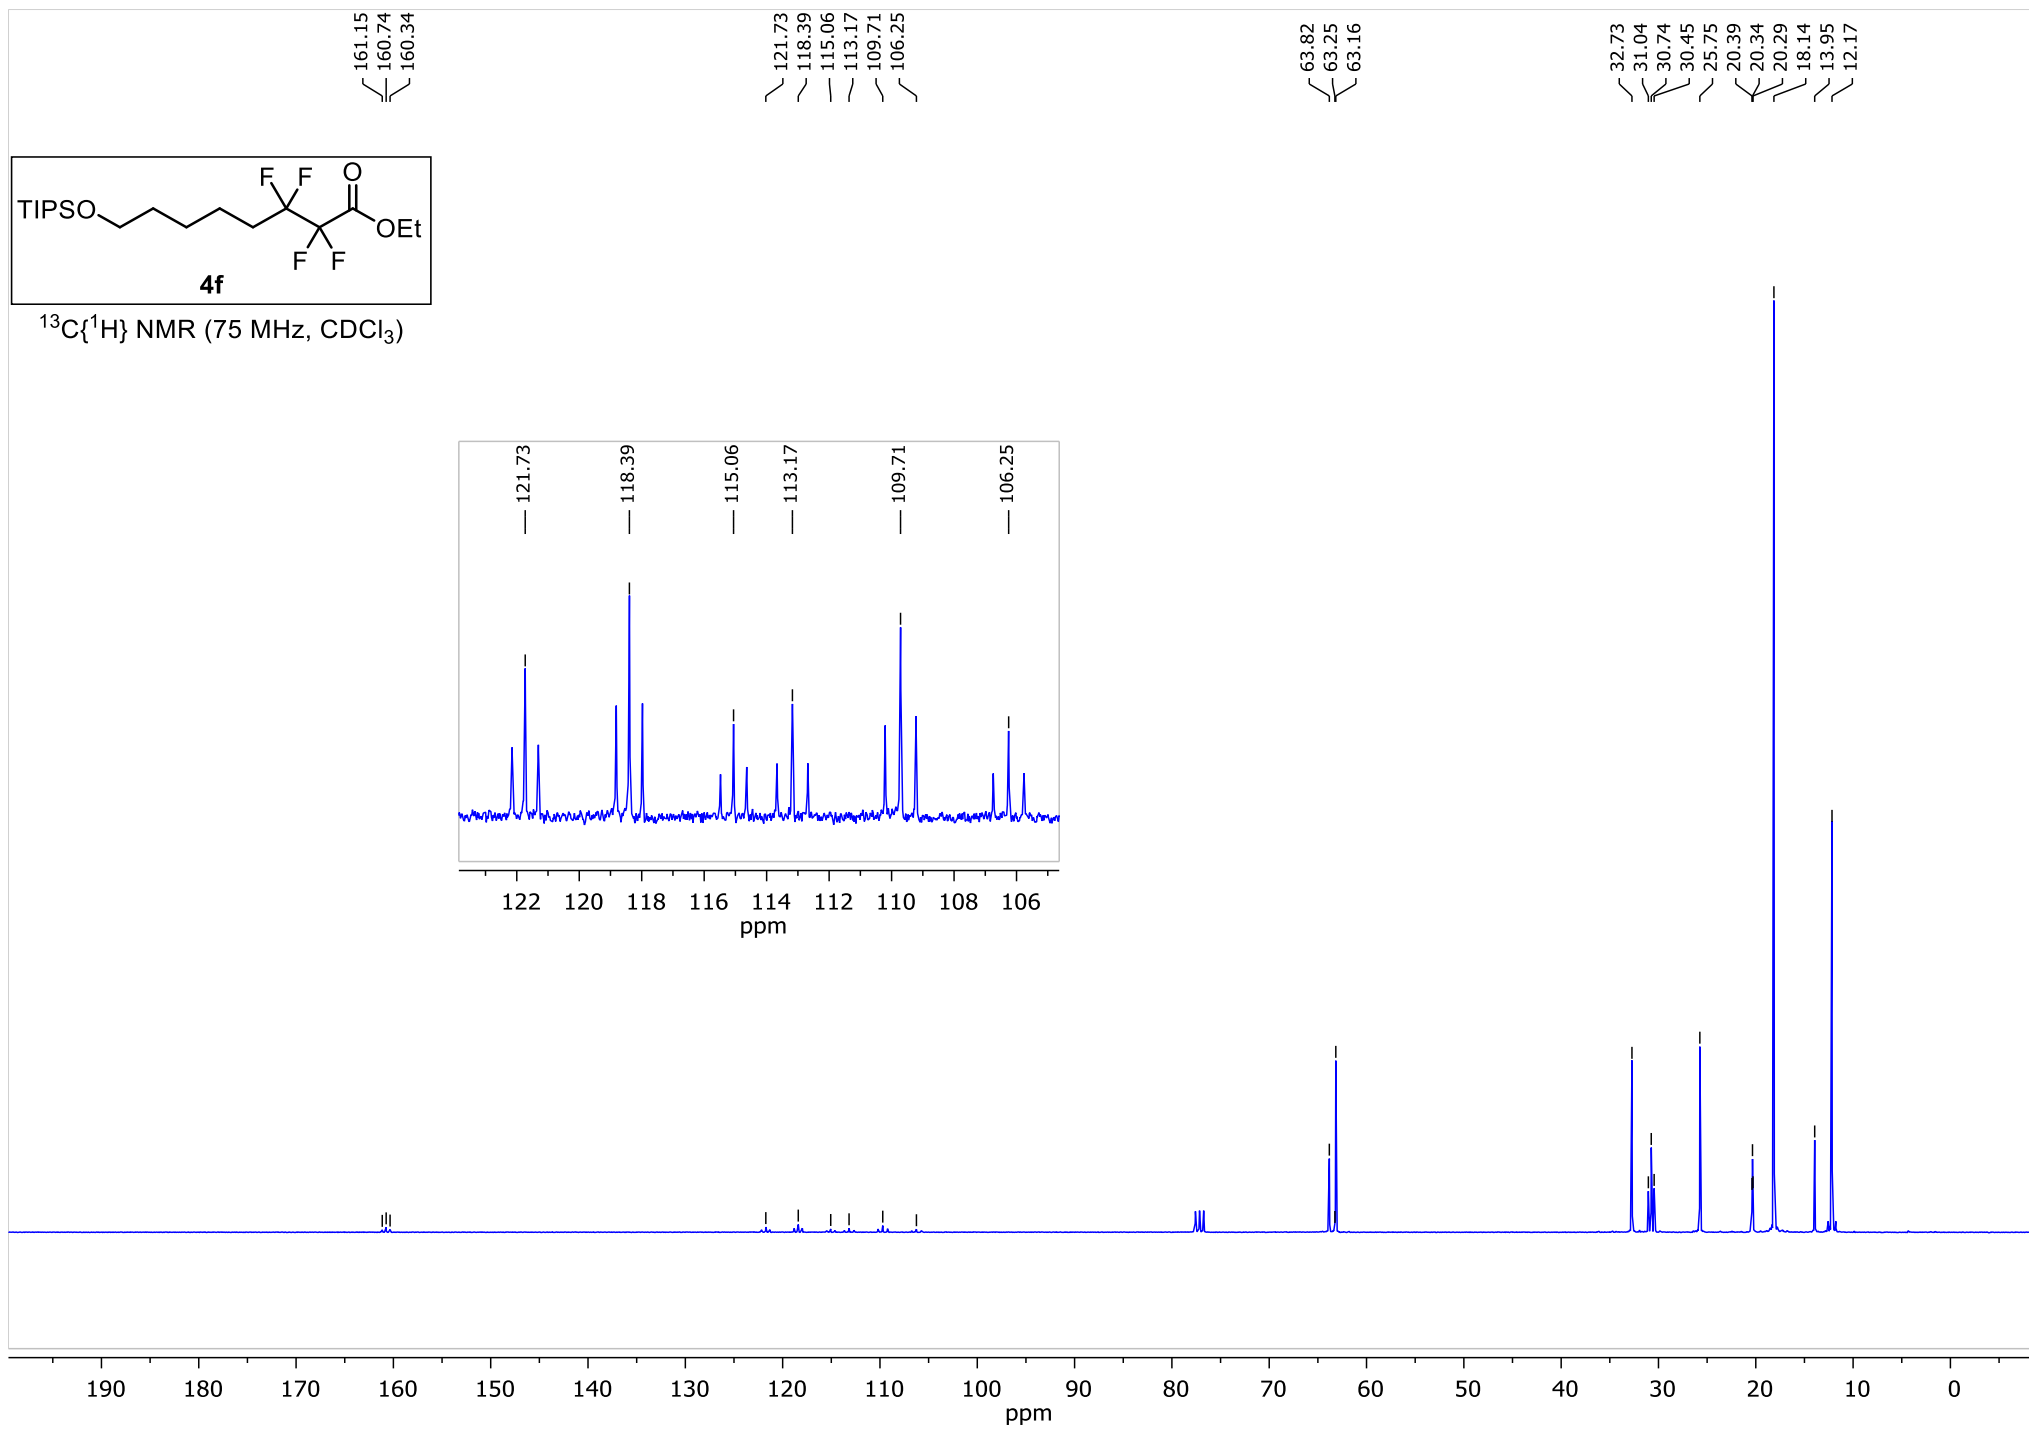

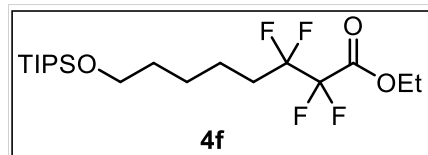

$^{19}\text{F}$  NMR (282 MHz,  $\text{CDCl}_3$ )

-115.58  
-115.65  
-115.72

-120.95

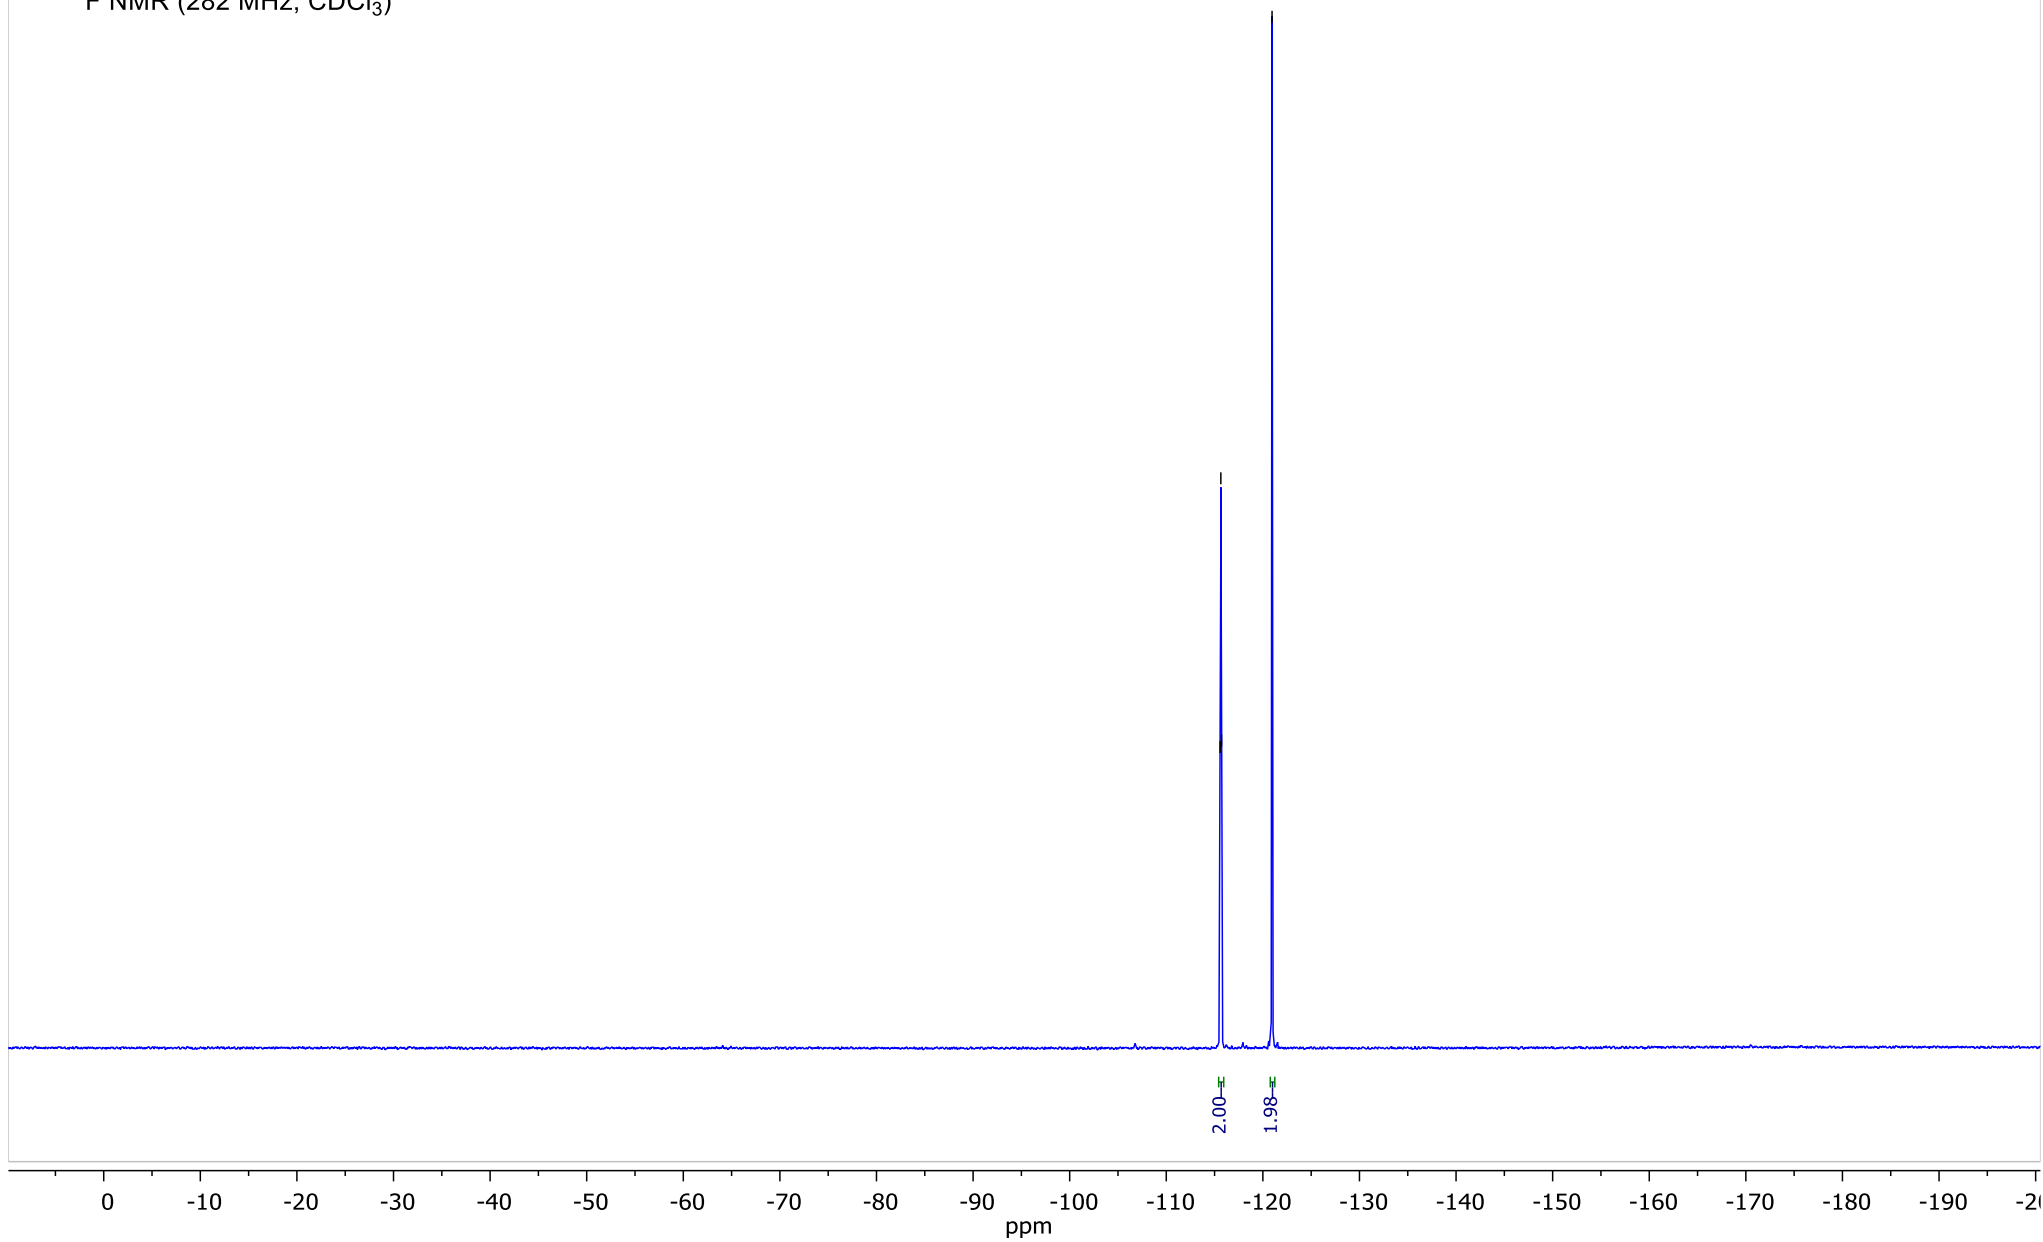

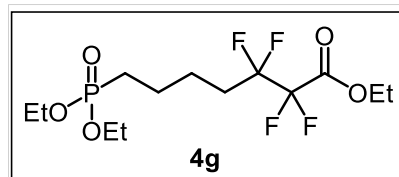

$^1\text{H}$  NMR (300 MHz,  $\text{CDCl}_3$ )

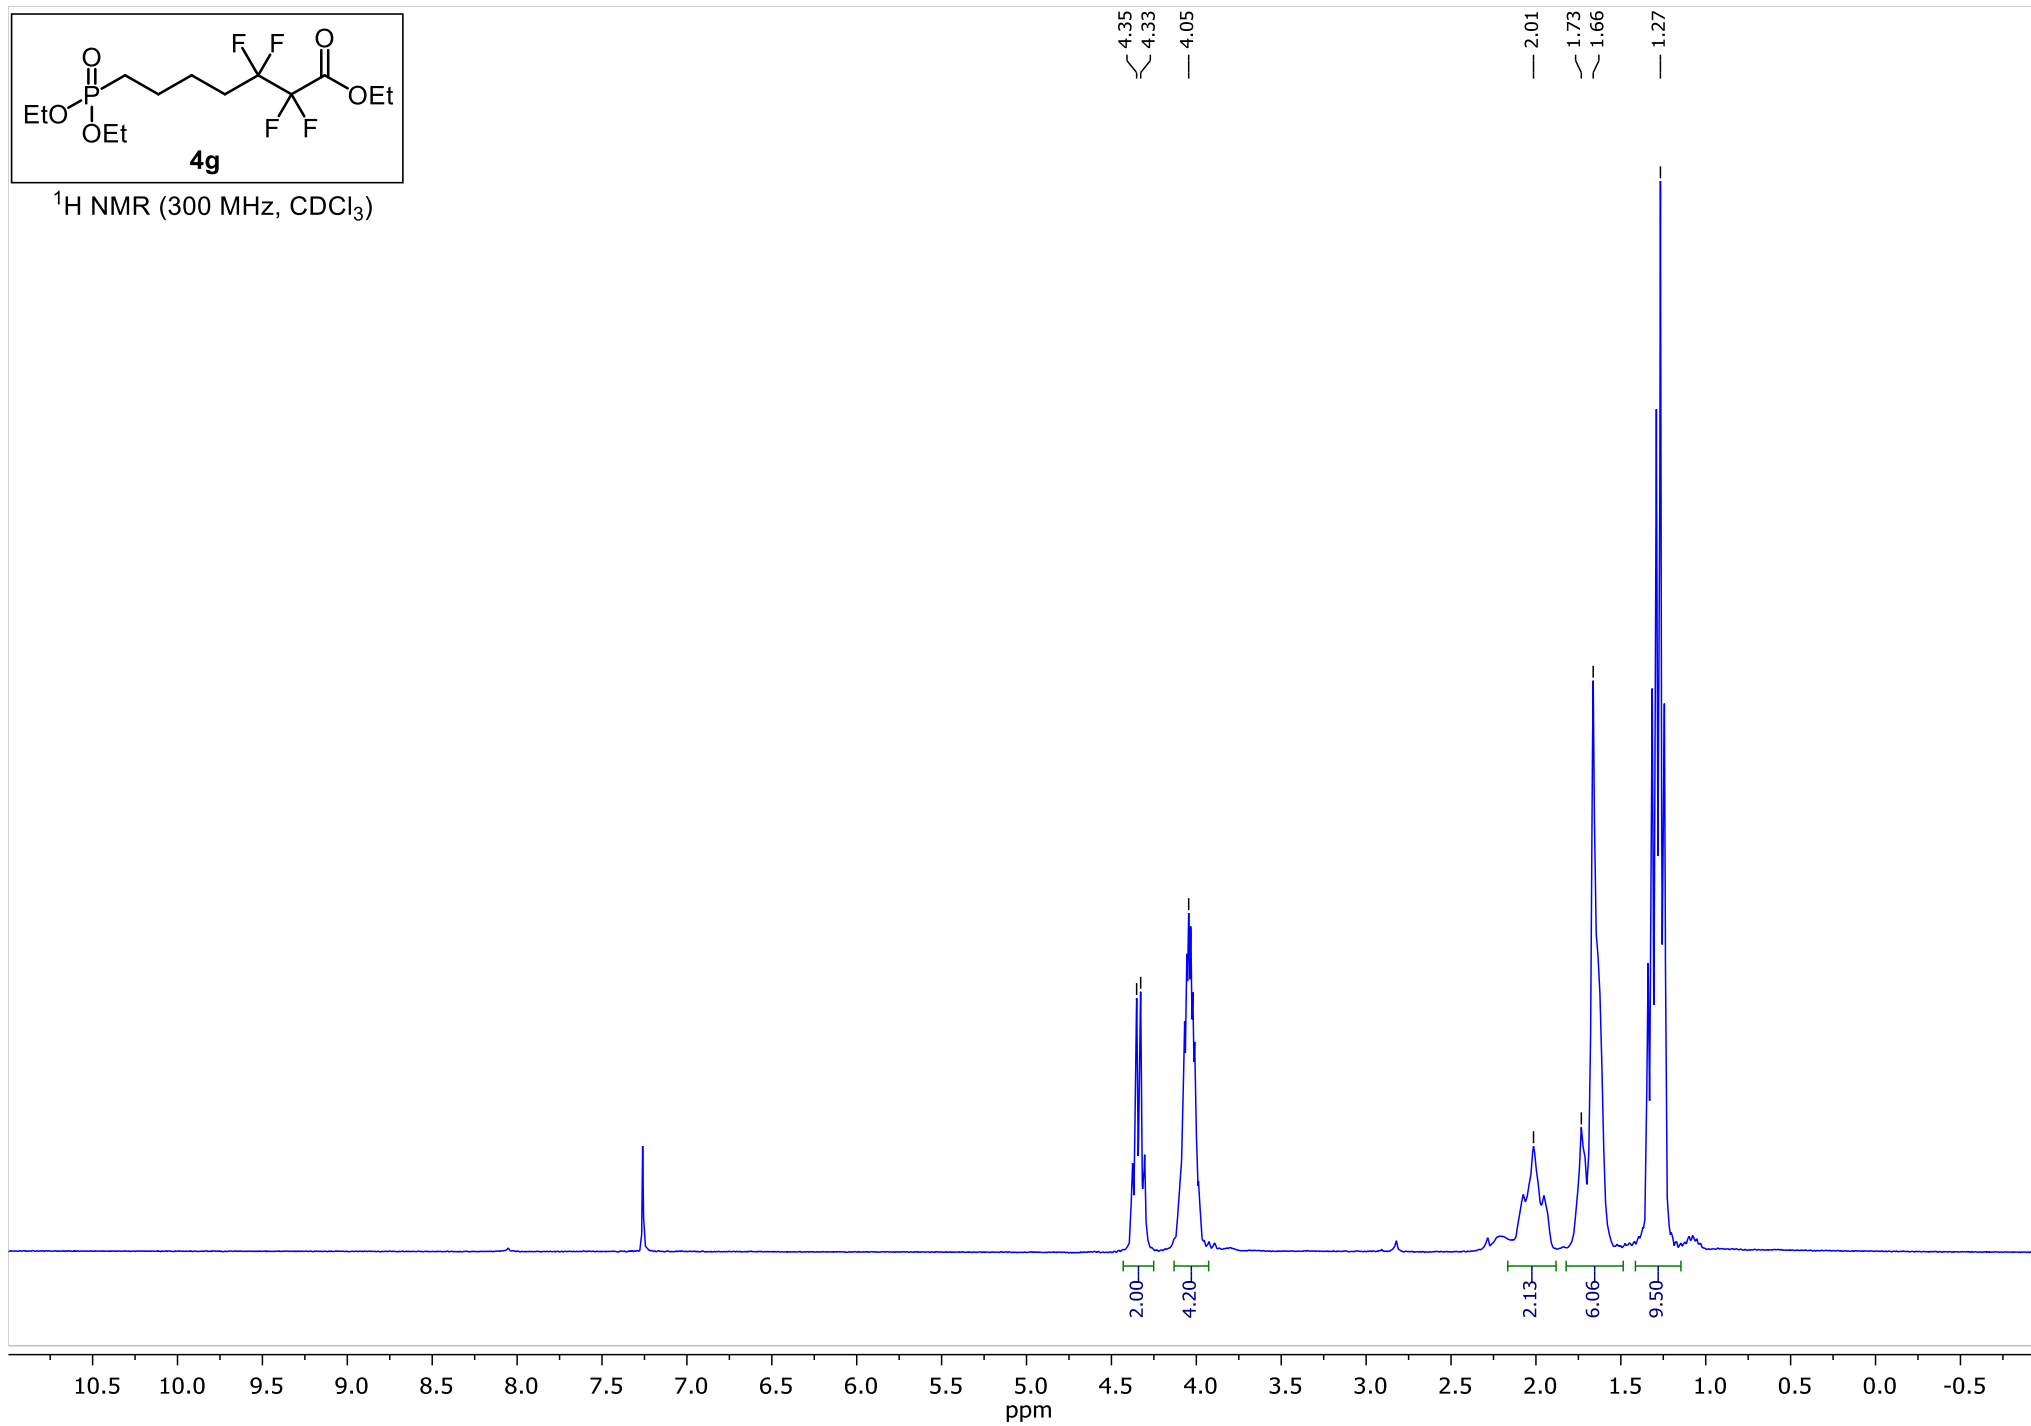

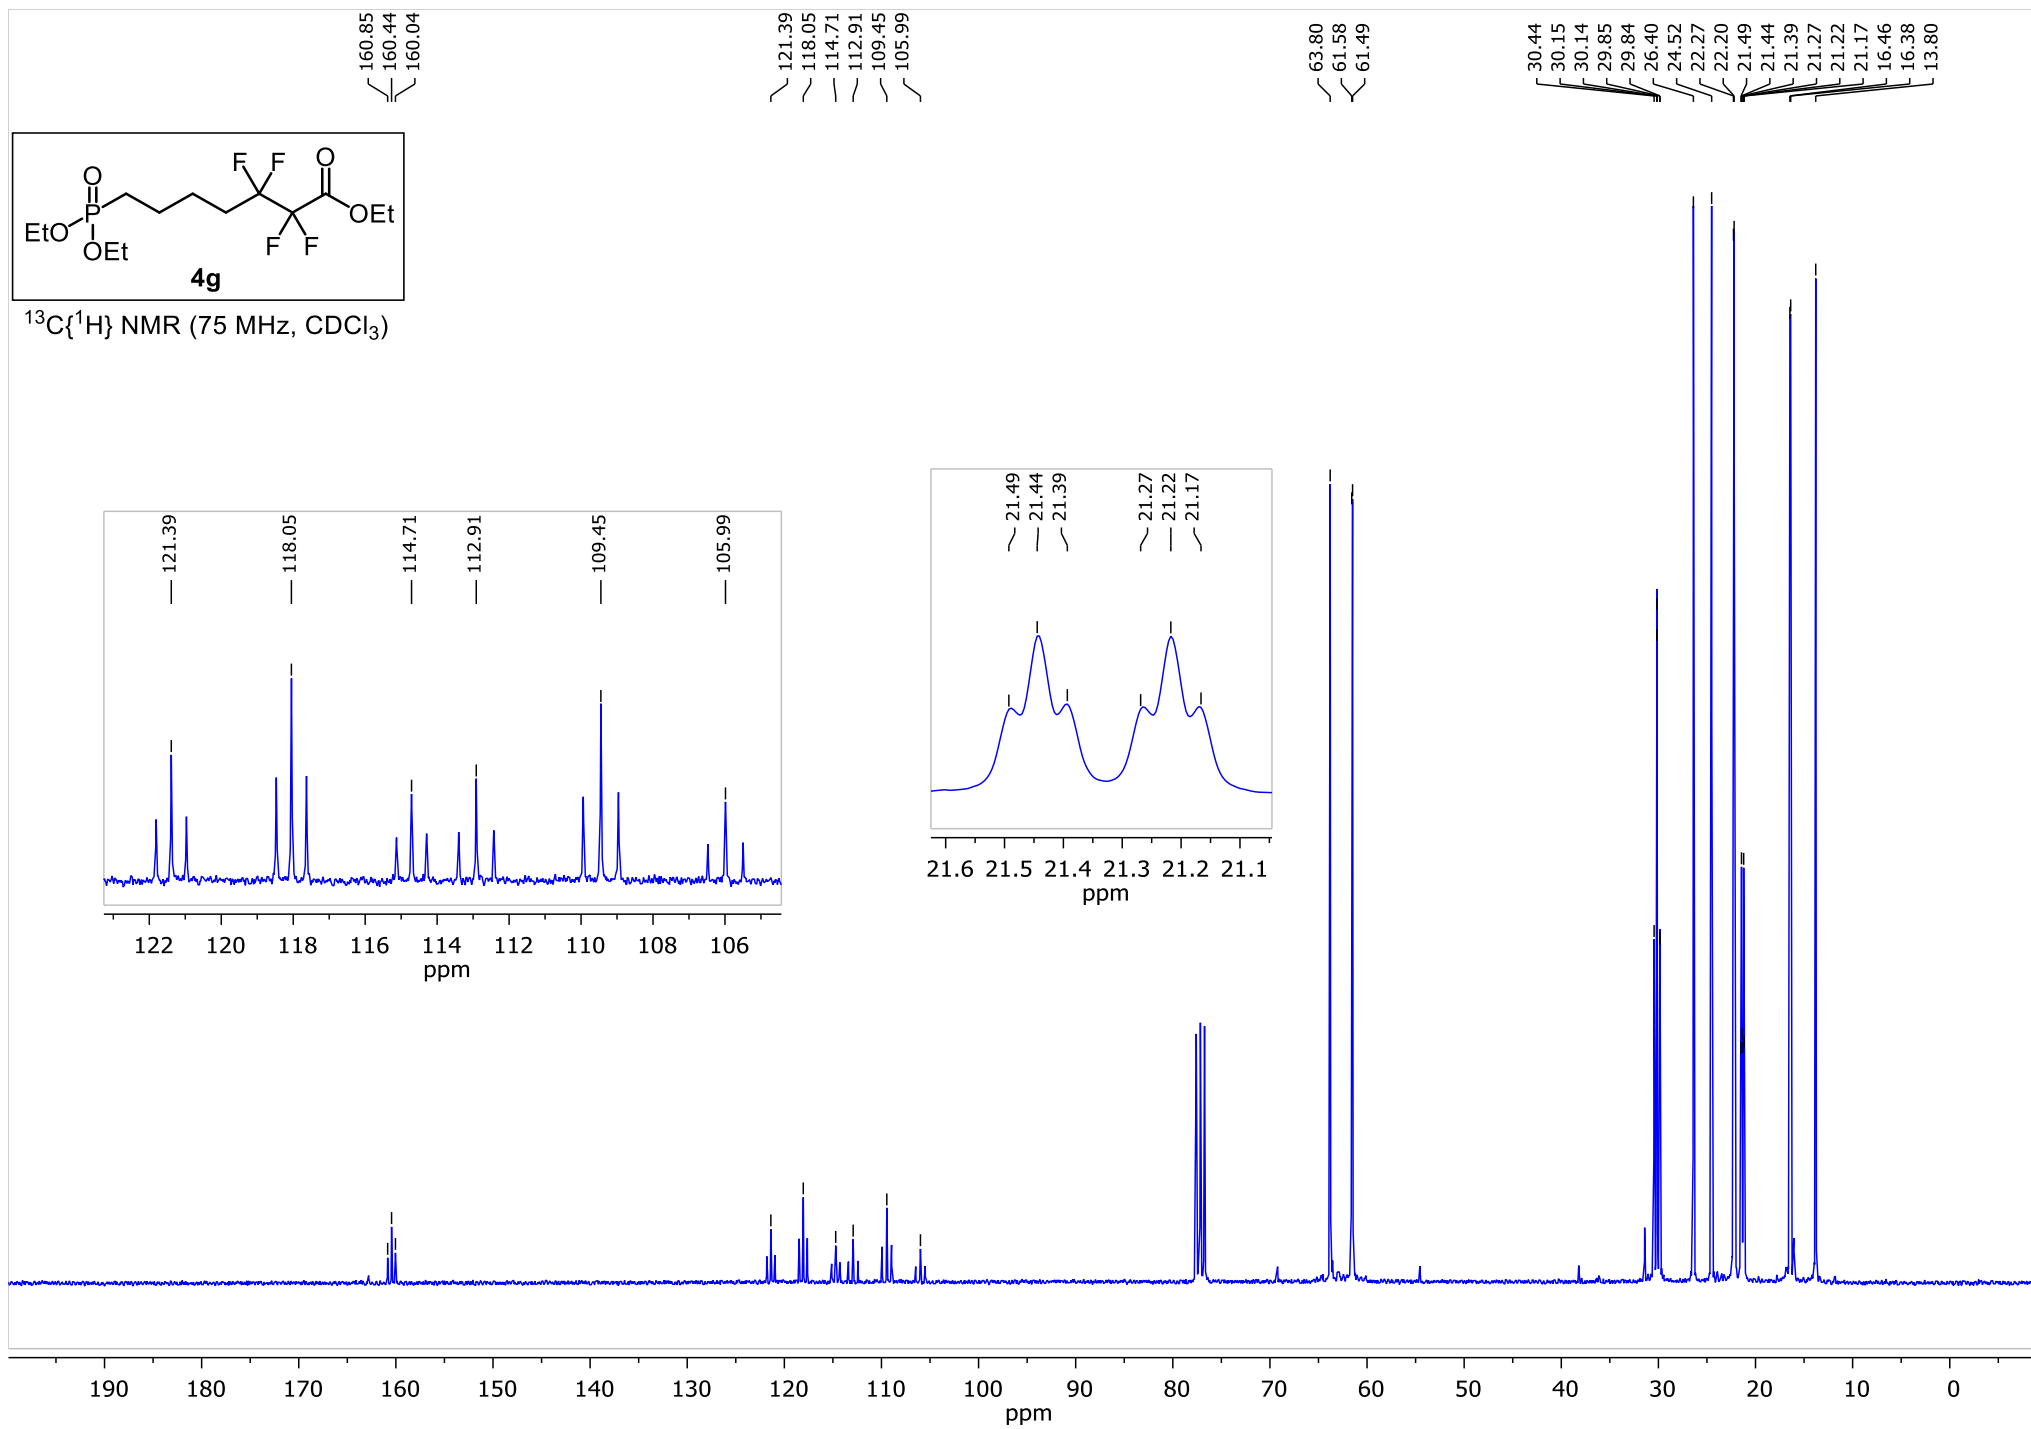

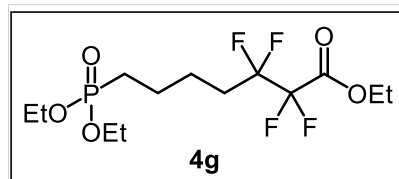

$^{19}\text{F}$  NMR (282 MHz,  $\text{CDCl}_3$ )

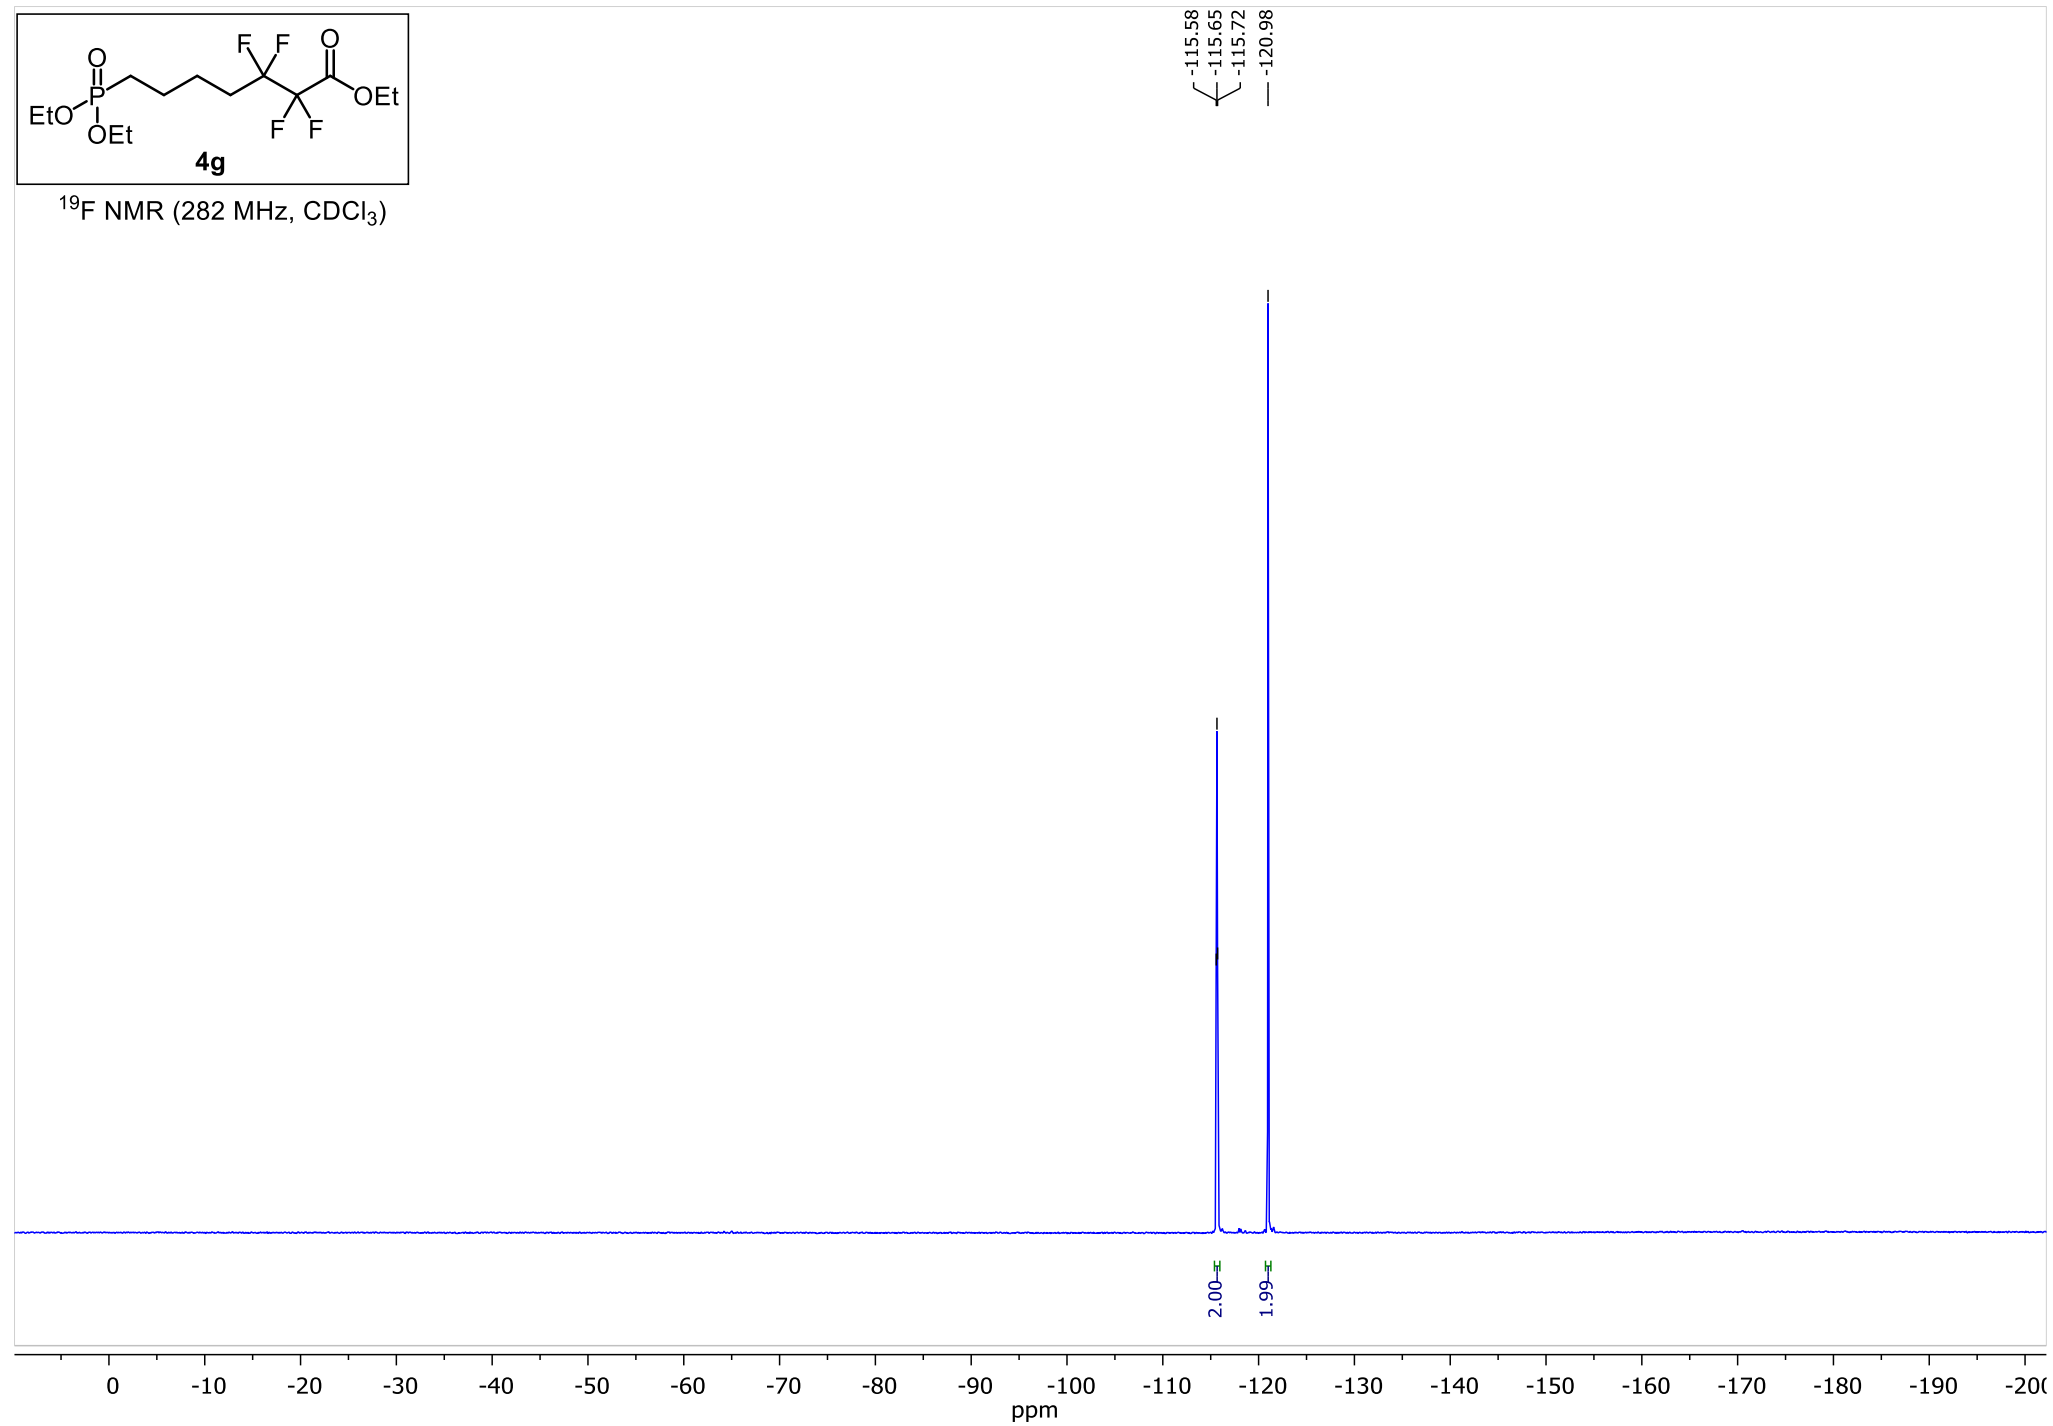



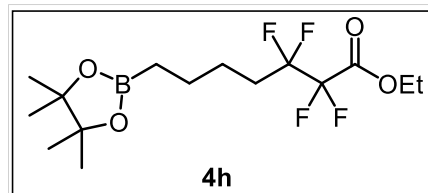

$^1\text{H NMR}$  (300 MHz,  $\text{CDCl}_3$ )

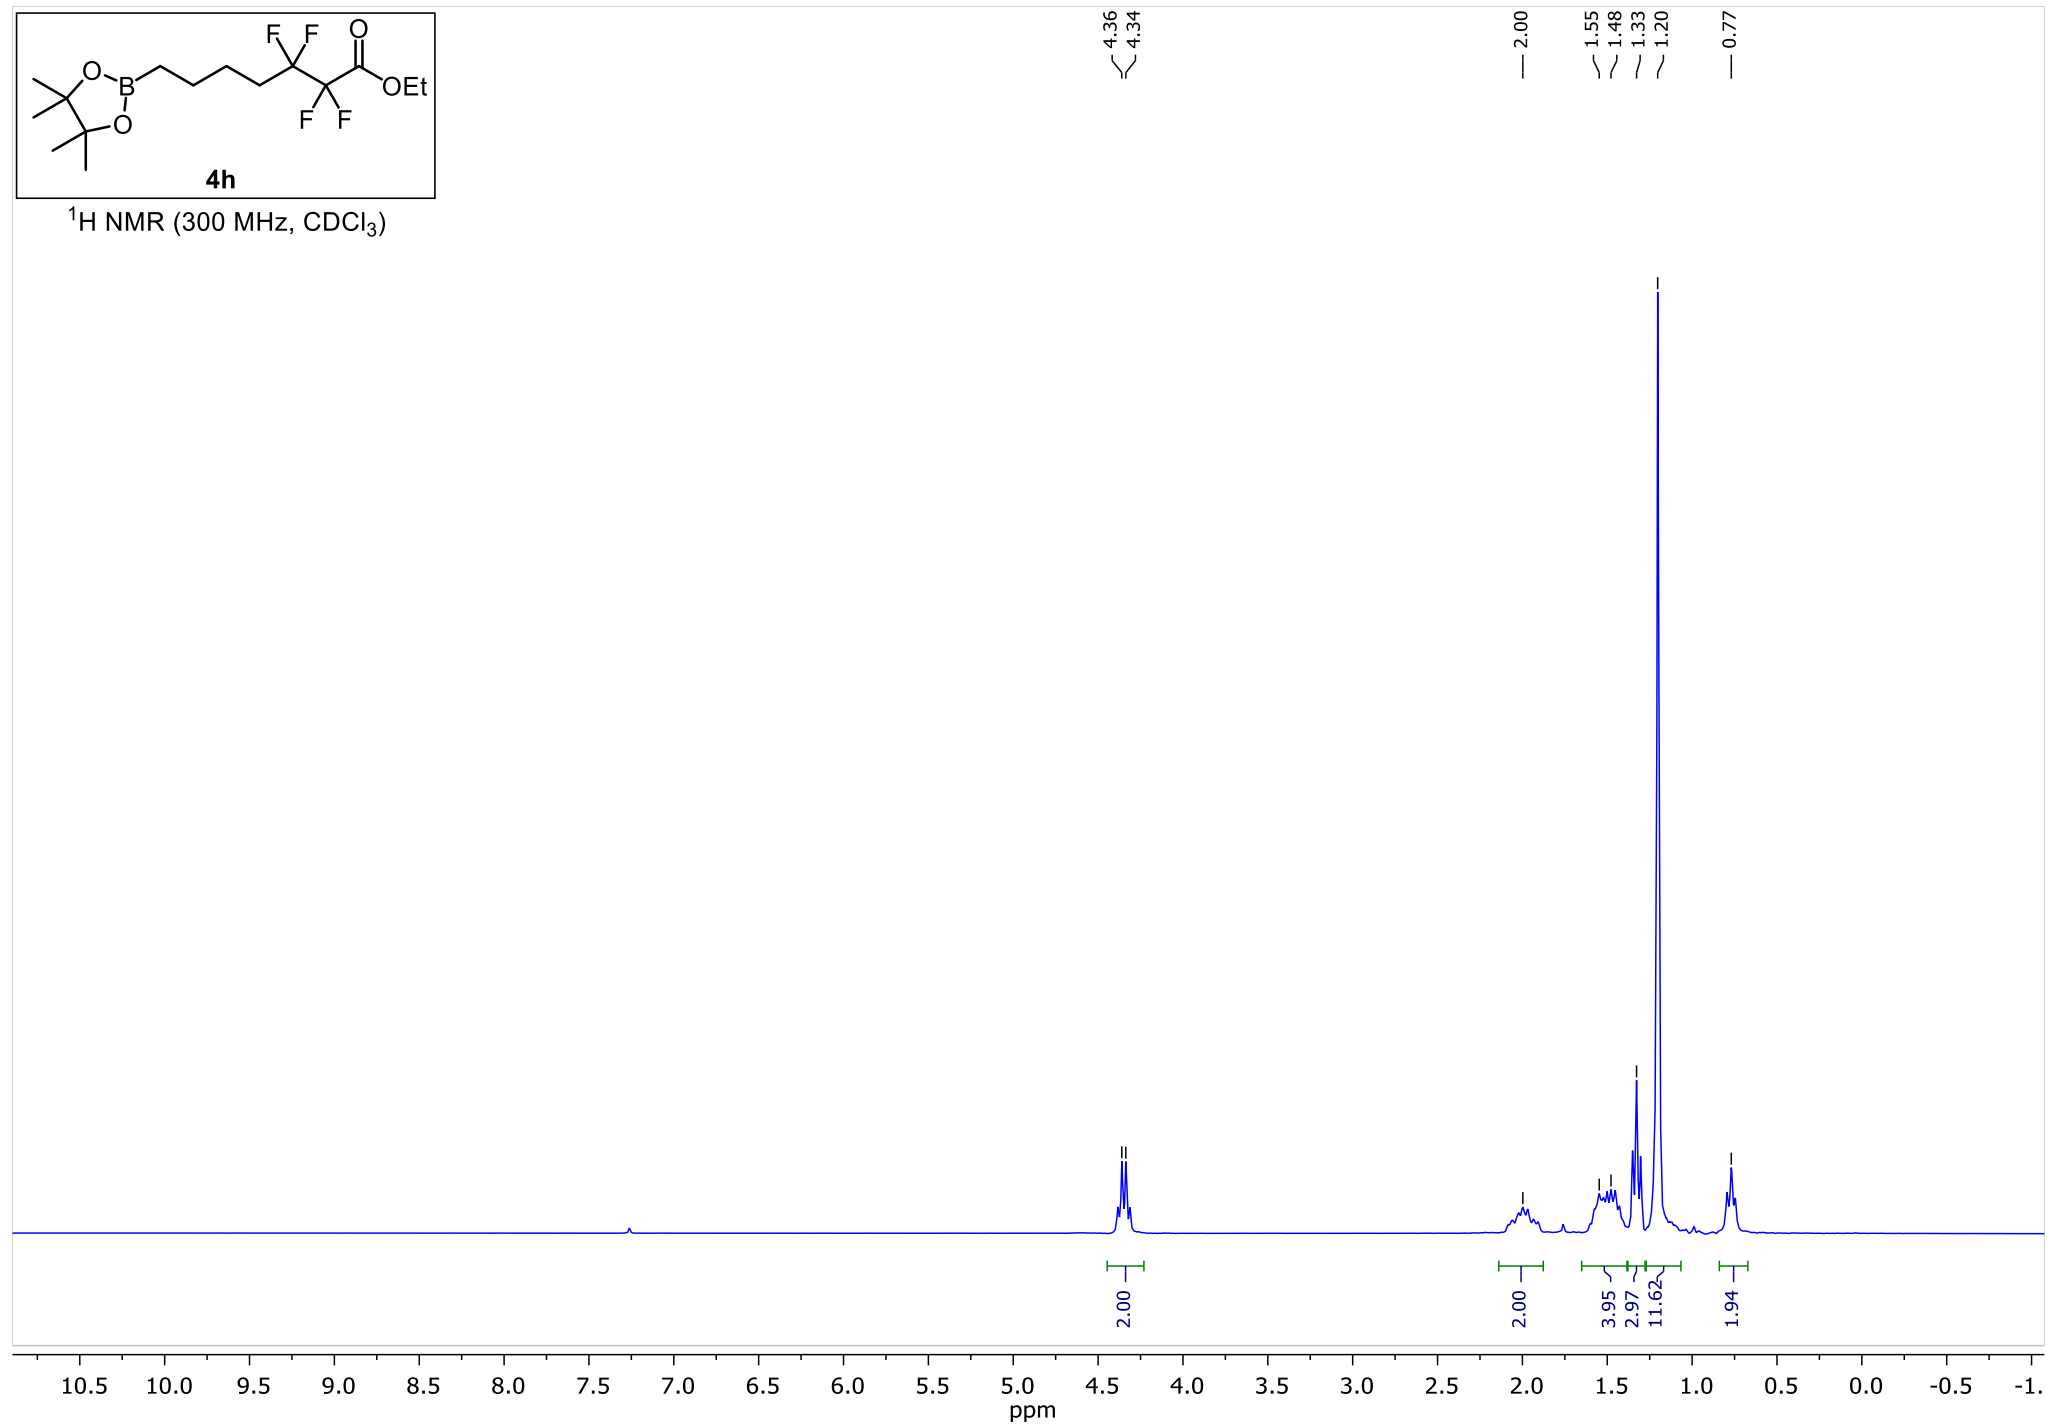

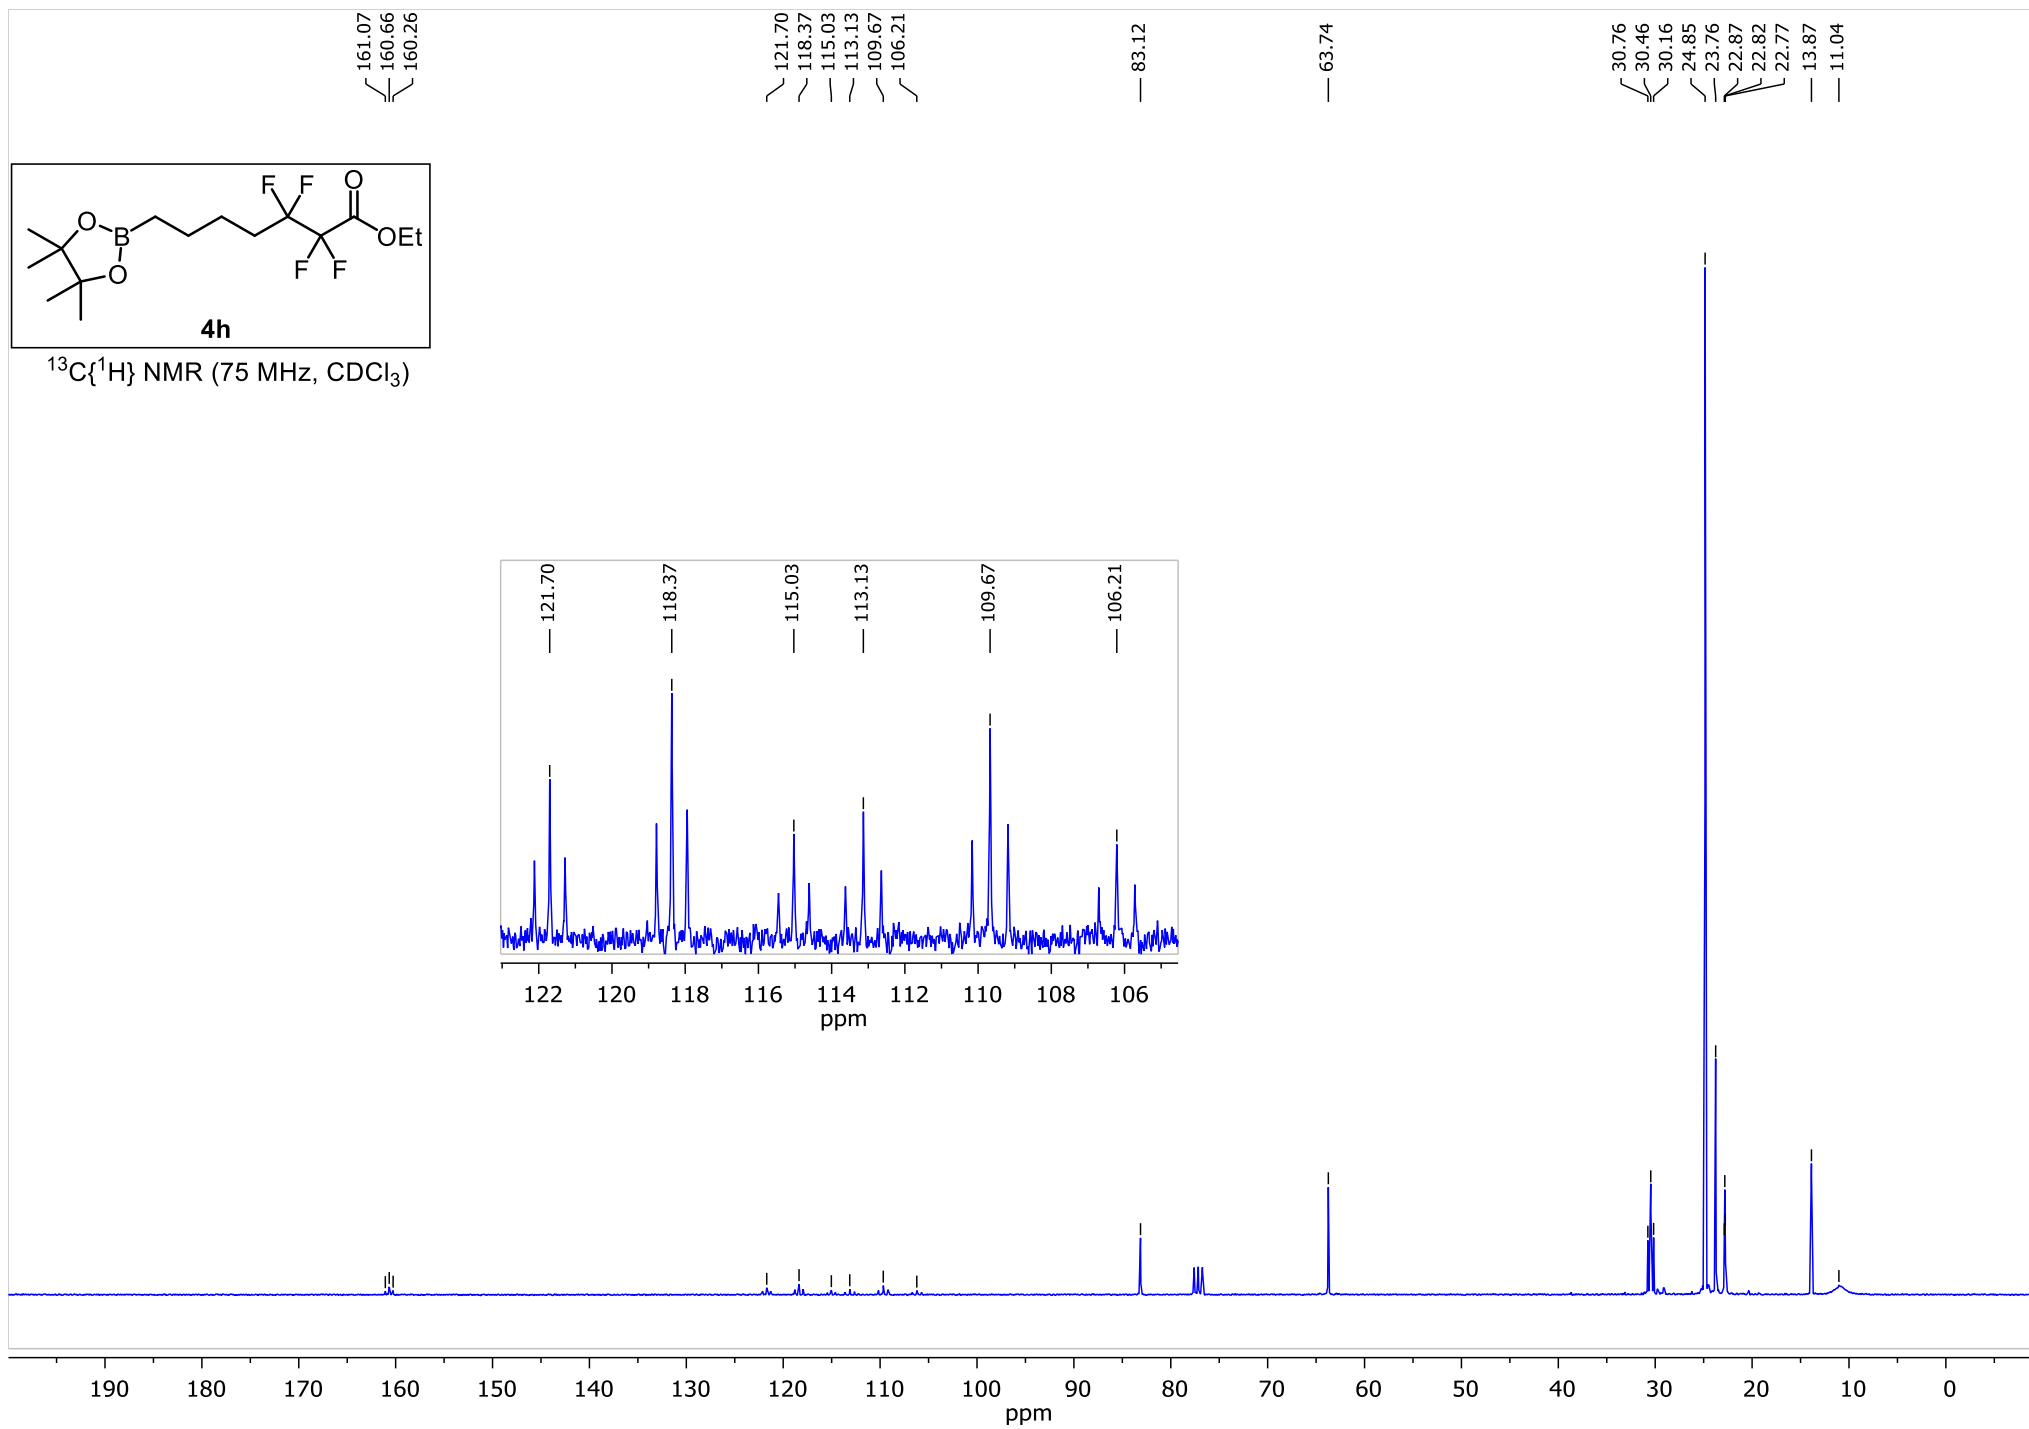

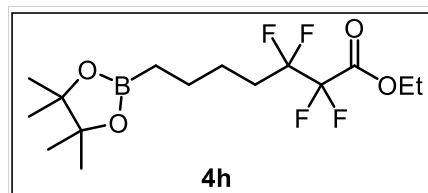

$^{19}\text{F}$  NMR (282 MHz,  $\text{CDCl}_3$ )

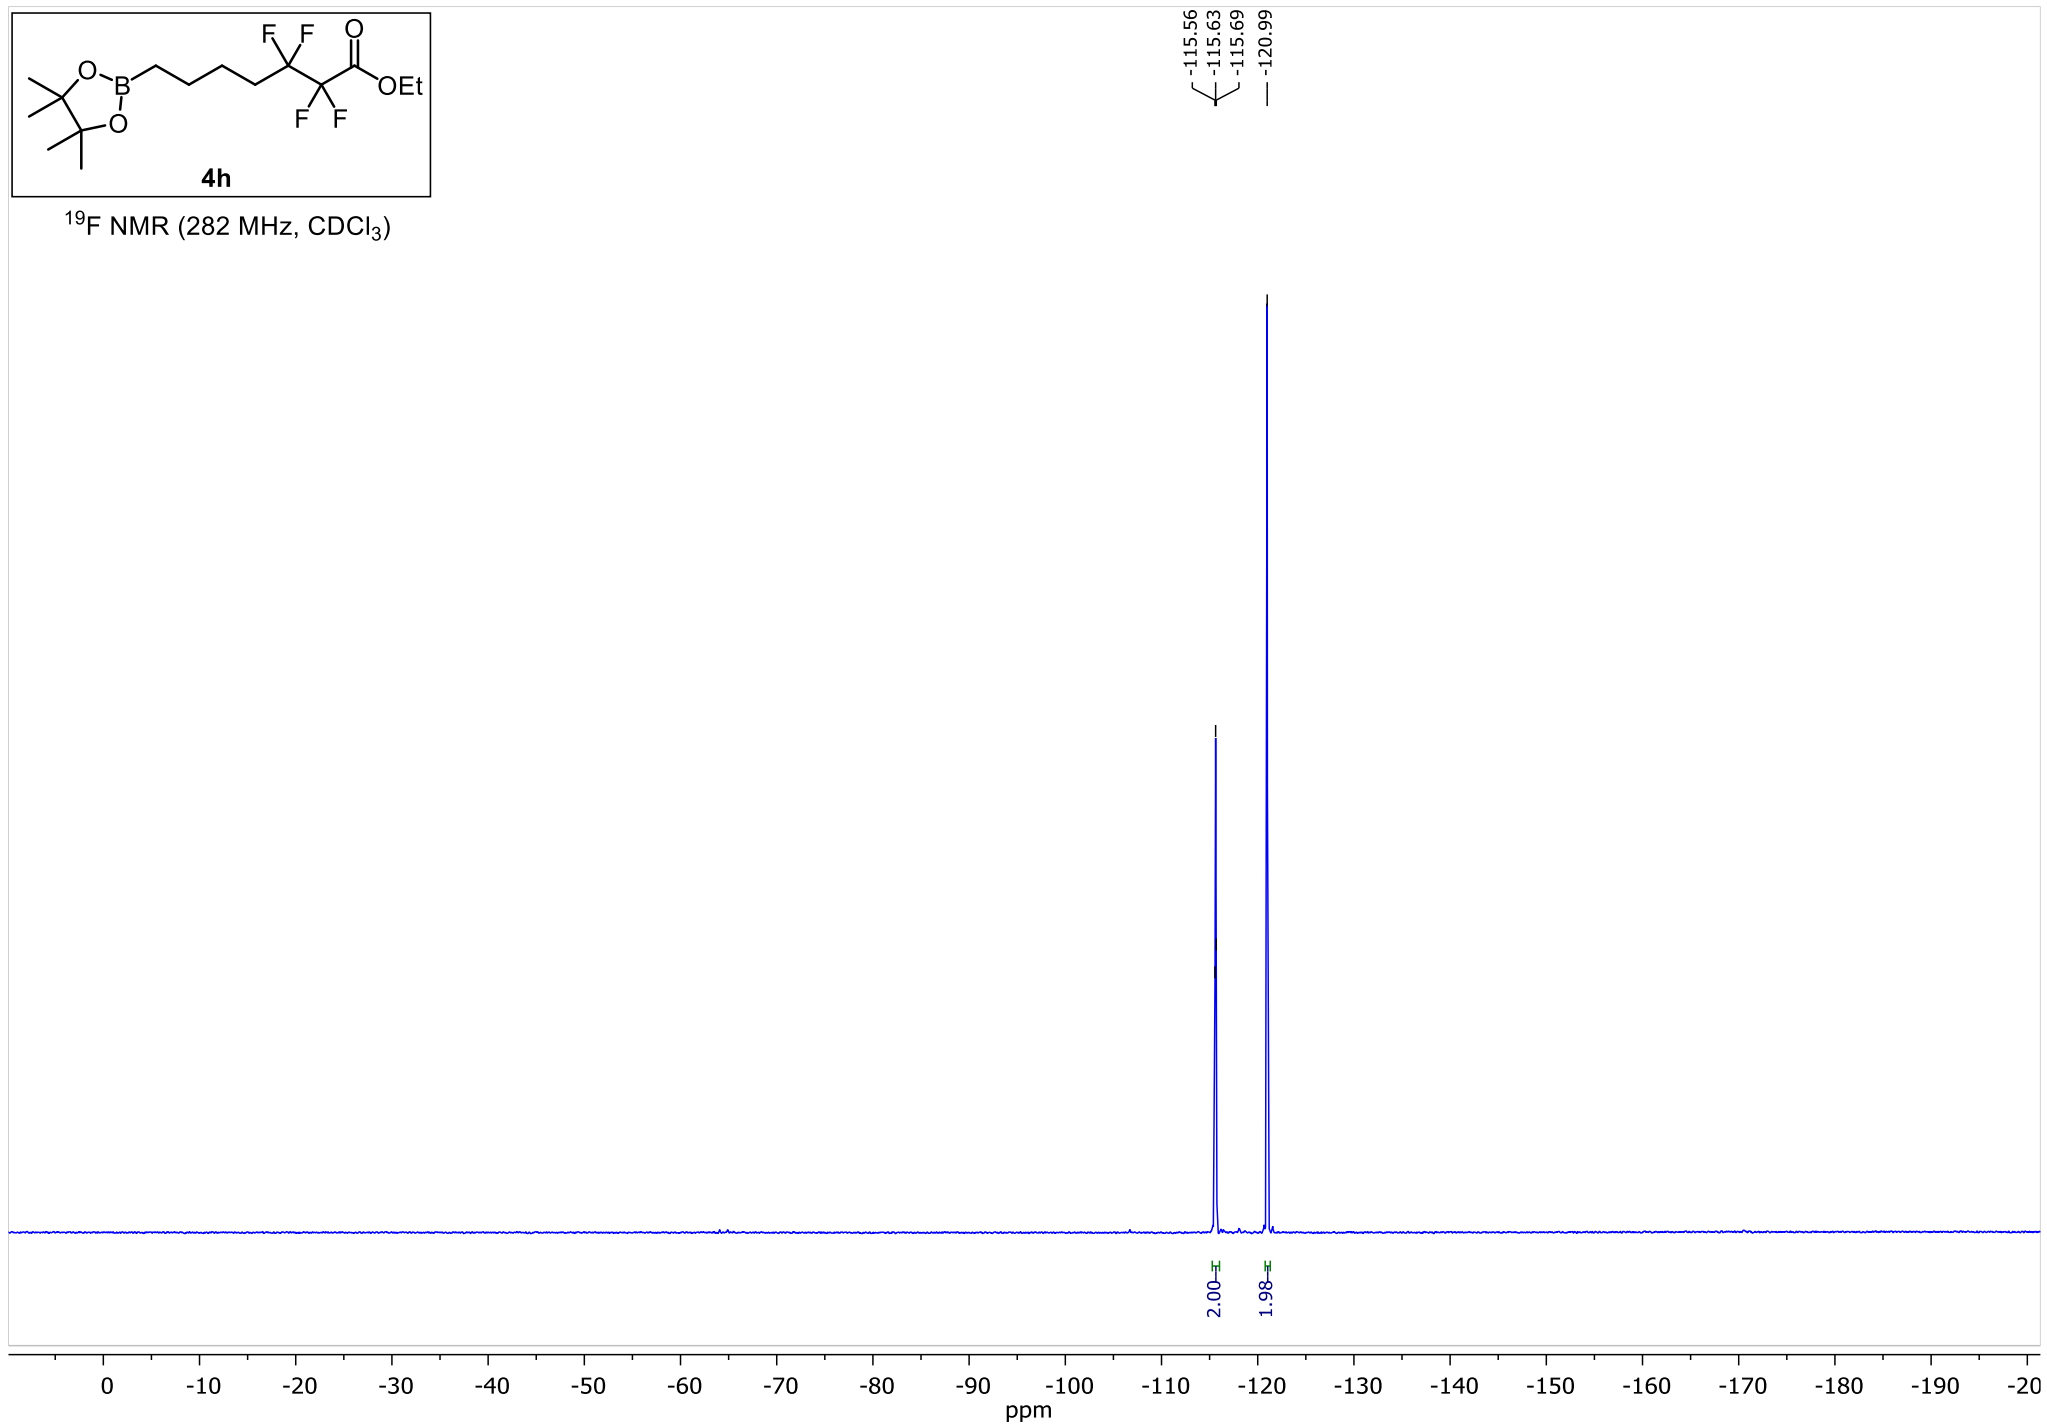

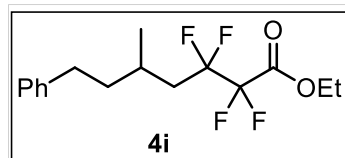

$^1\text{H}$  NMR (300 MHz,  $\text{CDCl}_3$ )

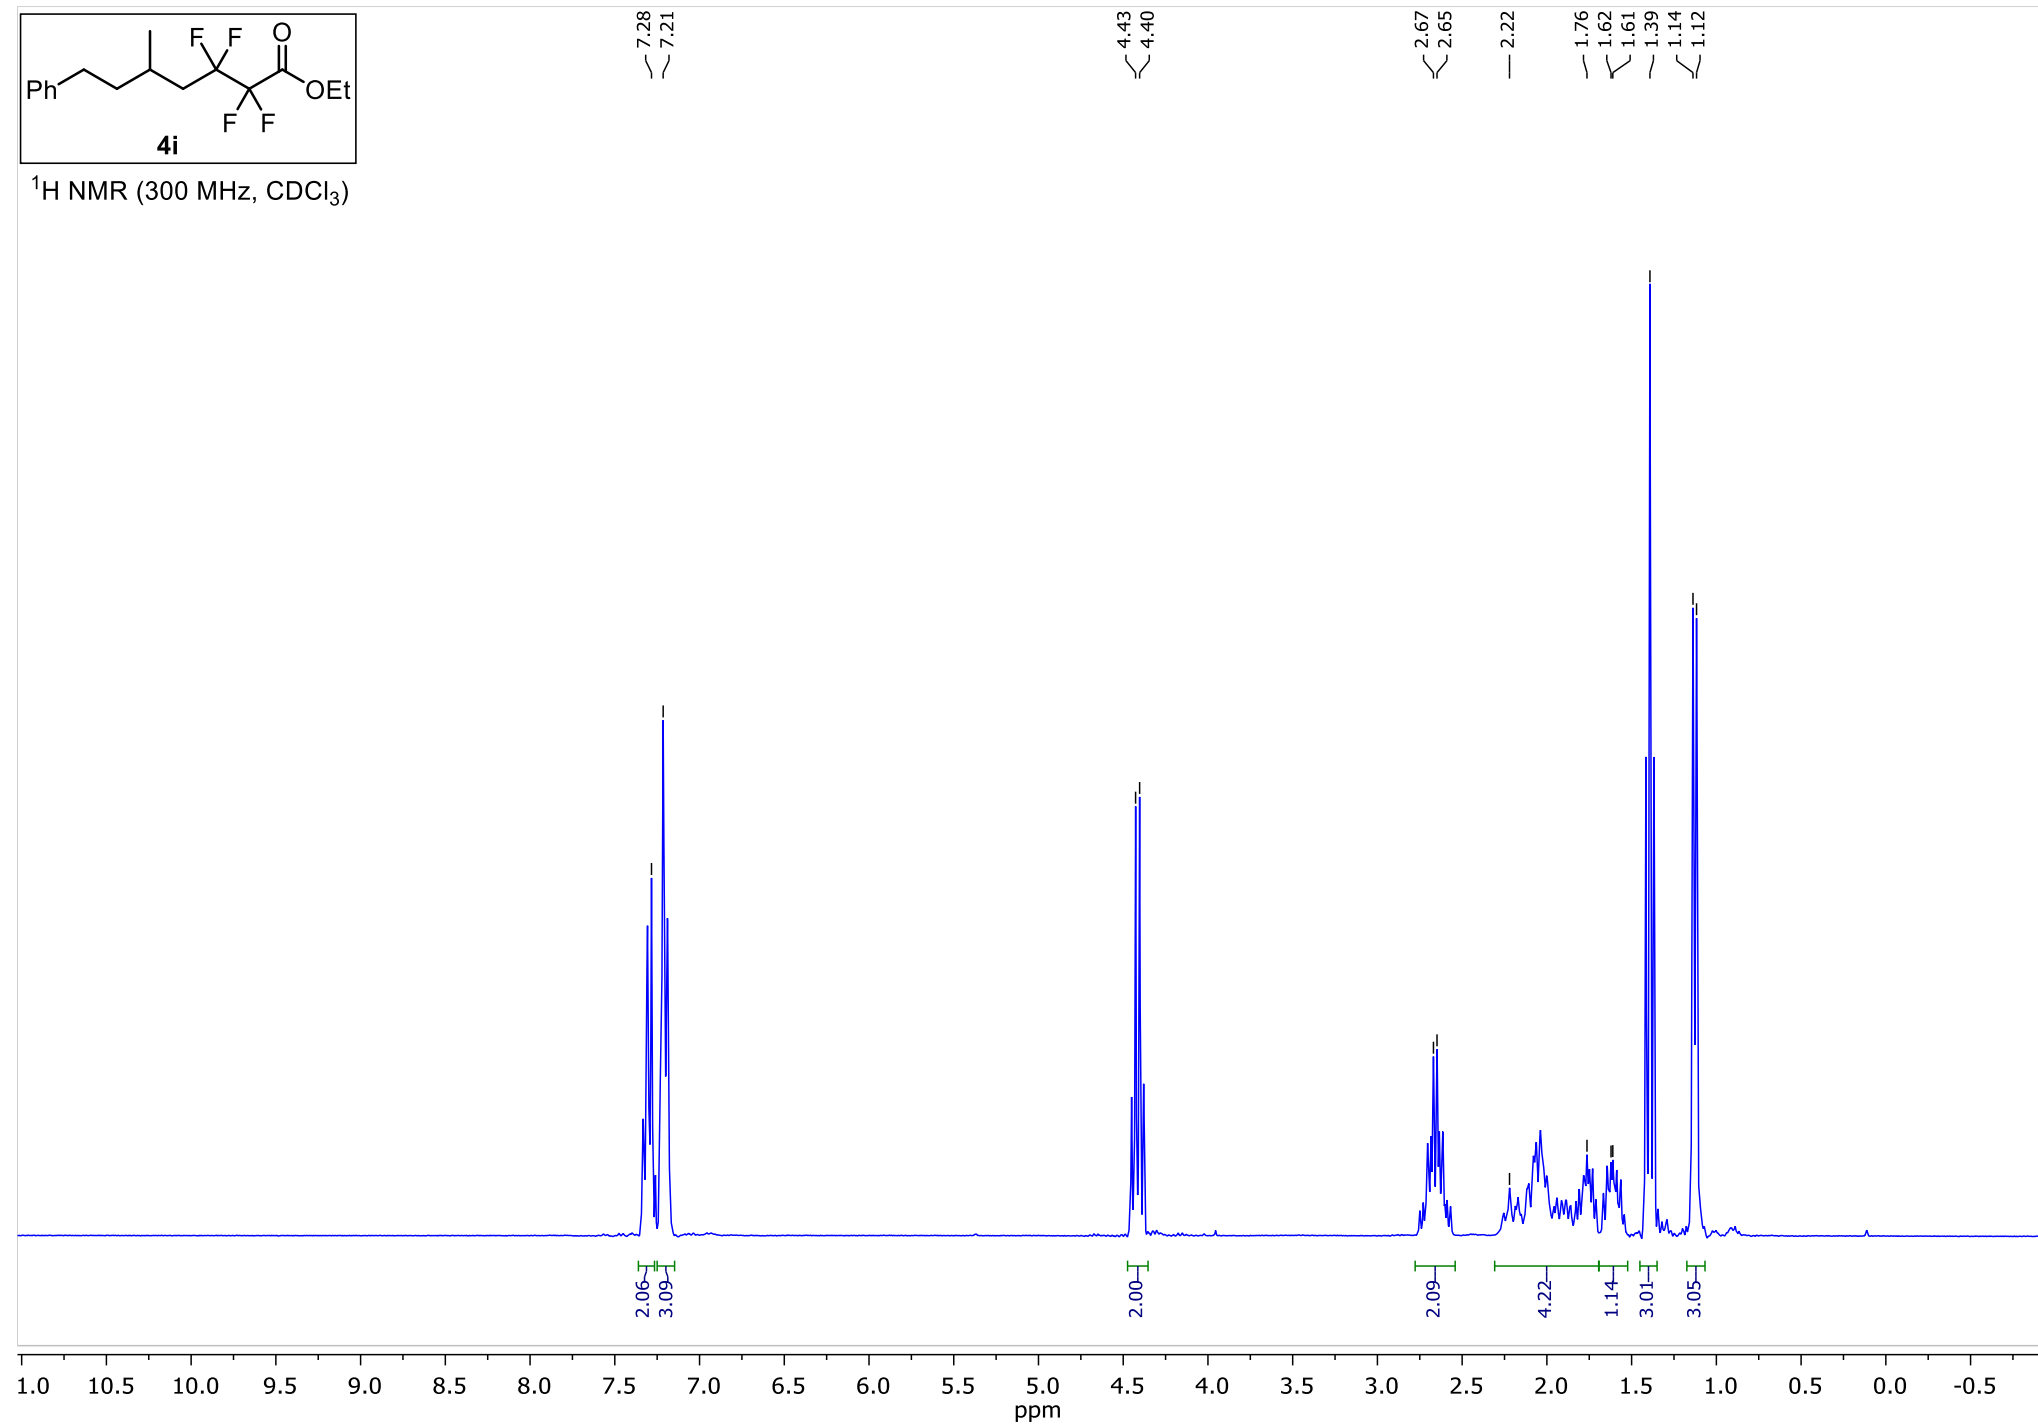

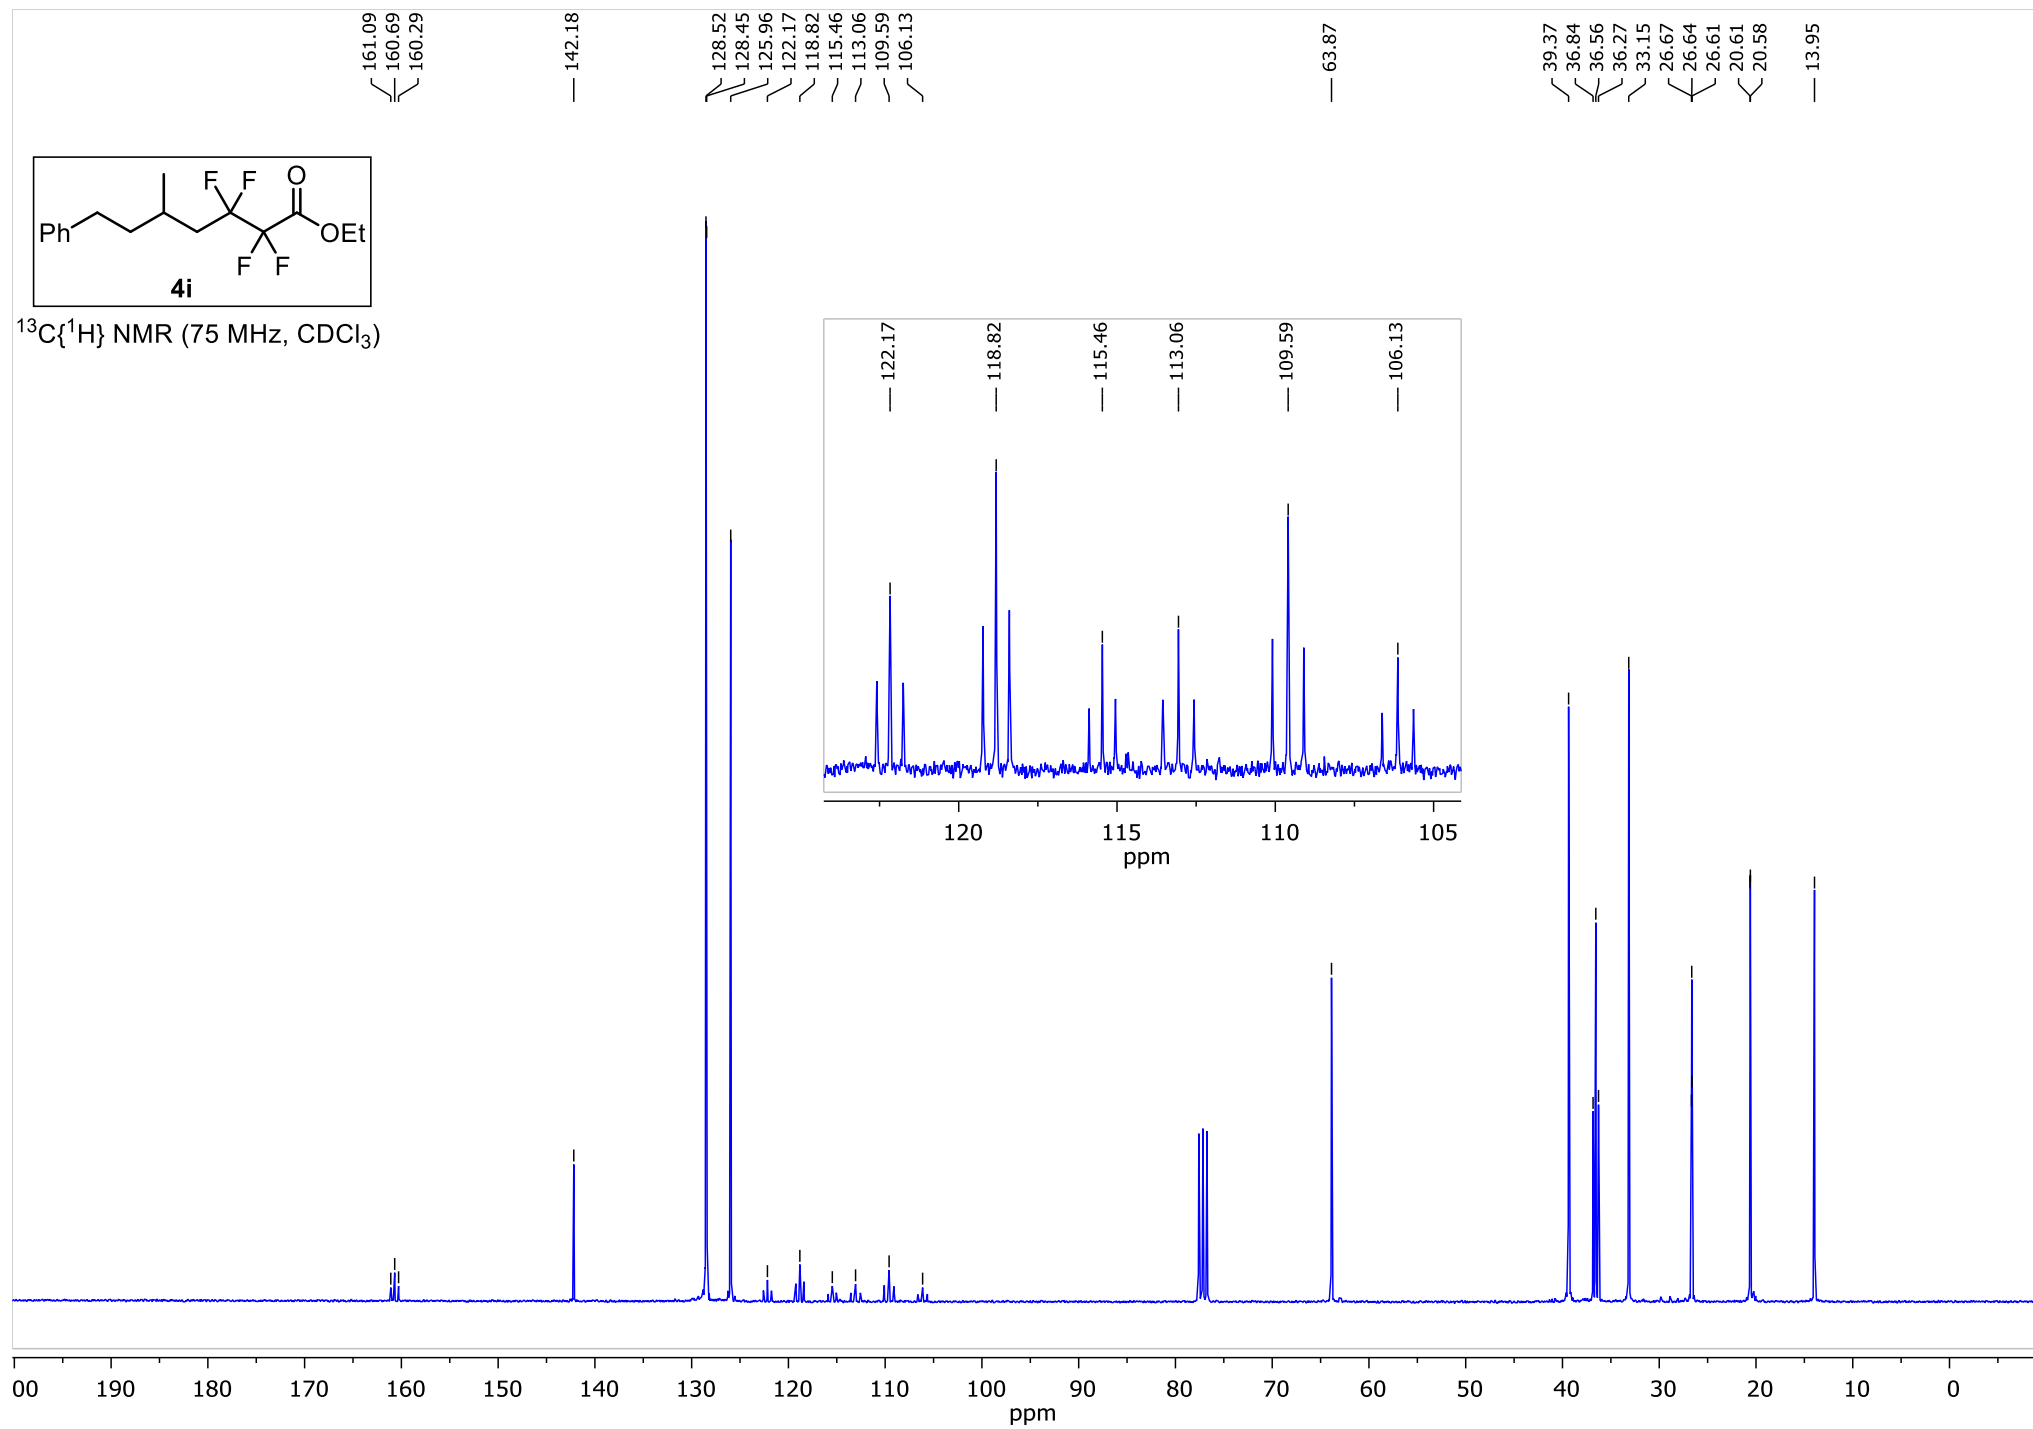

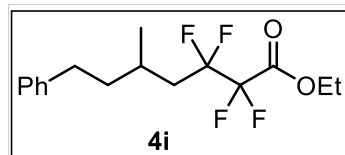

$^{19}\text{F}$  NMR (282 MHz,  $\text{CDCl}_3$ )

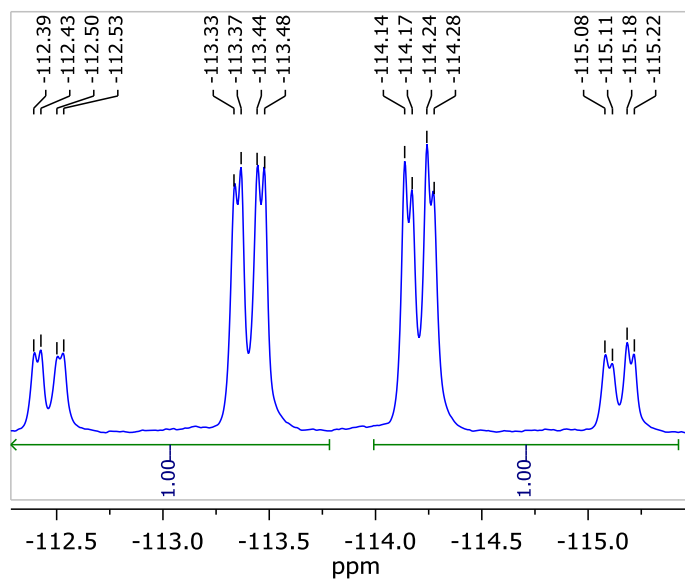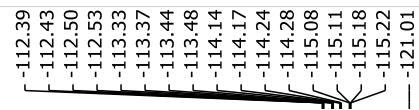

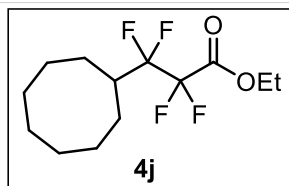

$^1\text{H}$  NMR (300 MHz,  $\text{CDCl}_3$ )

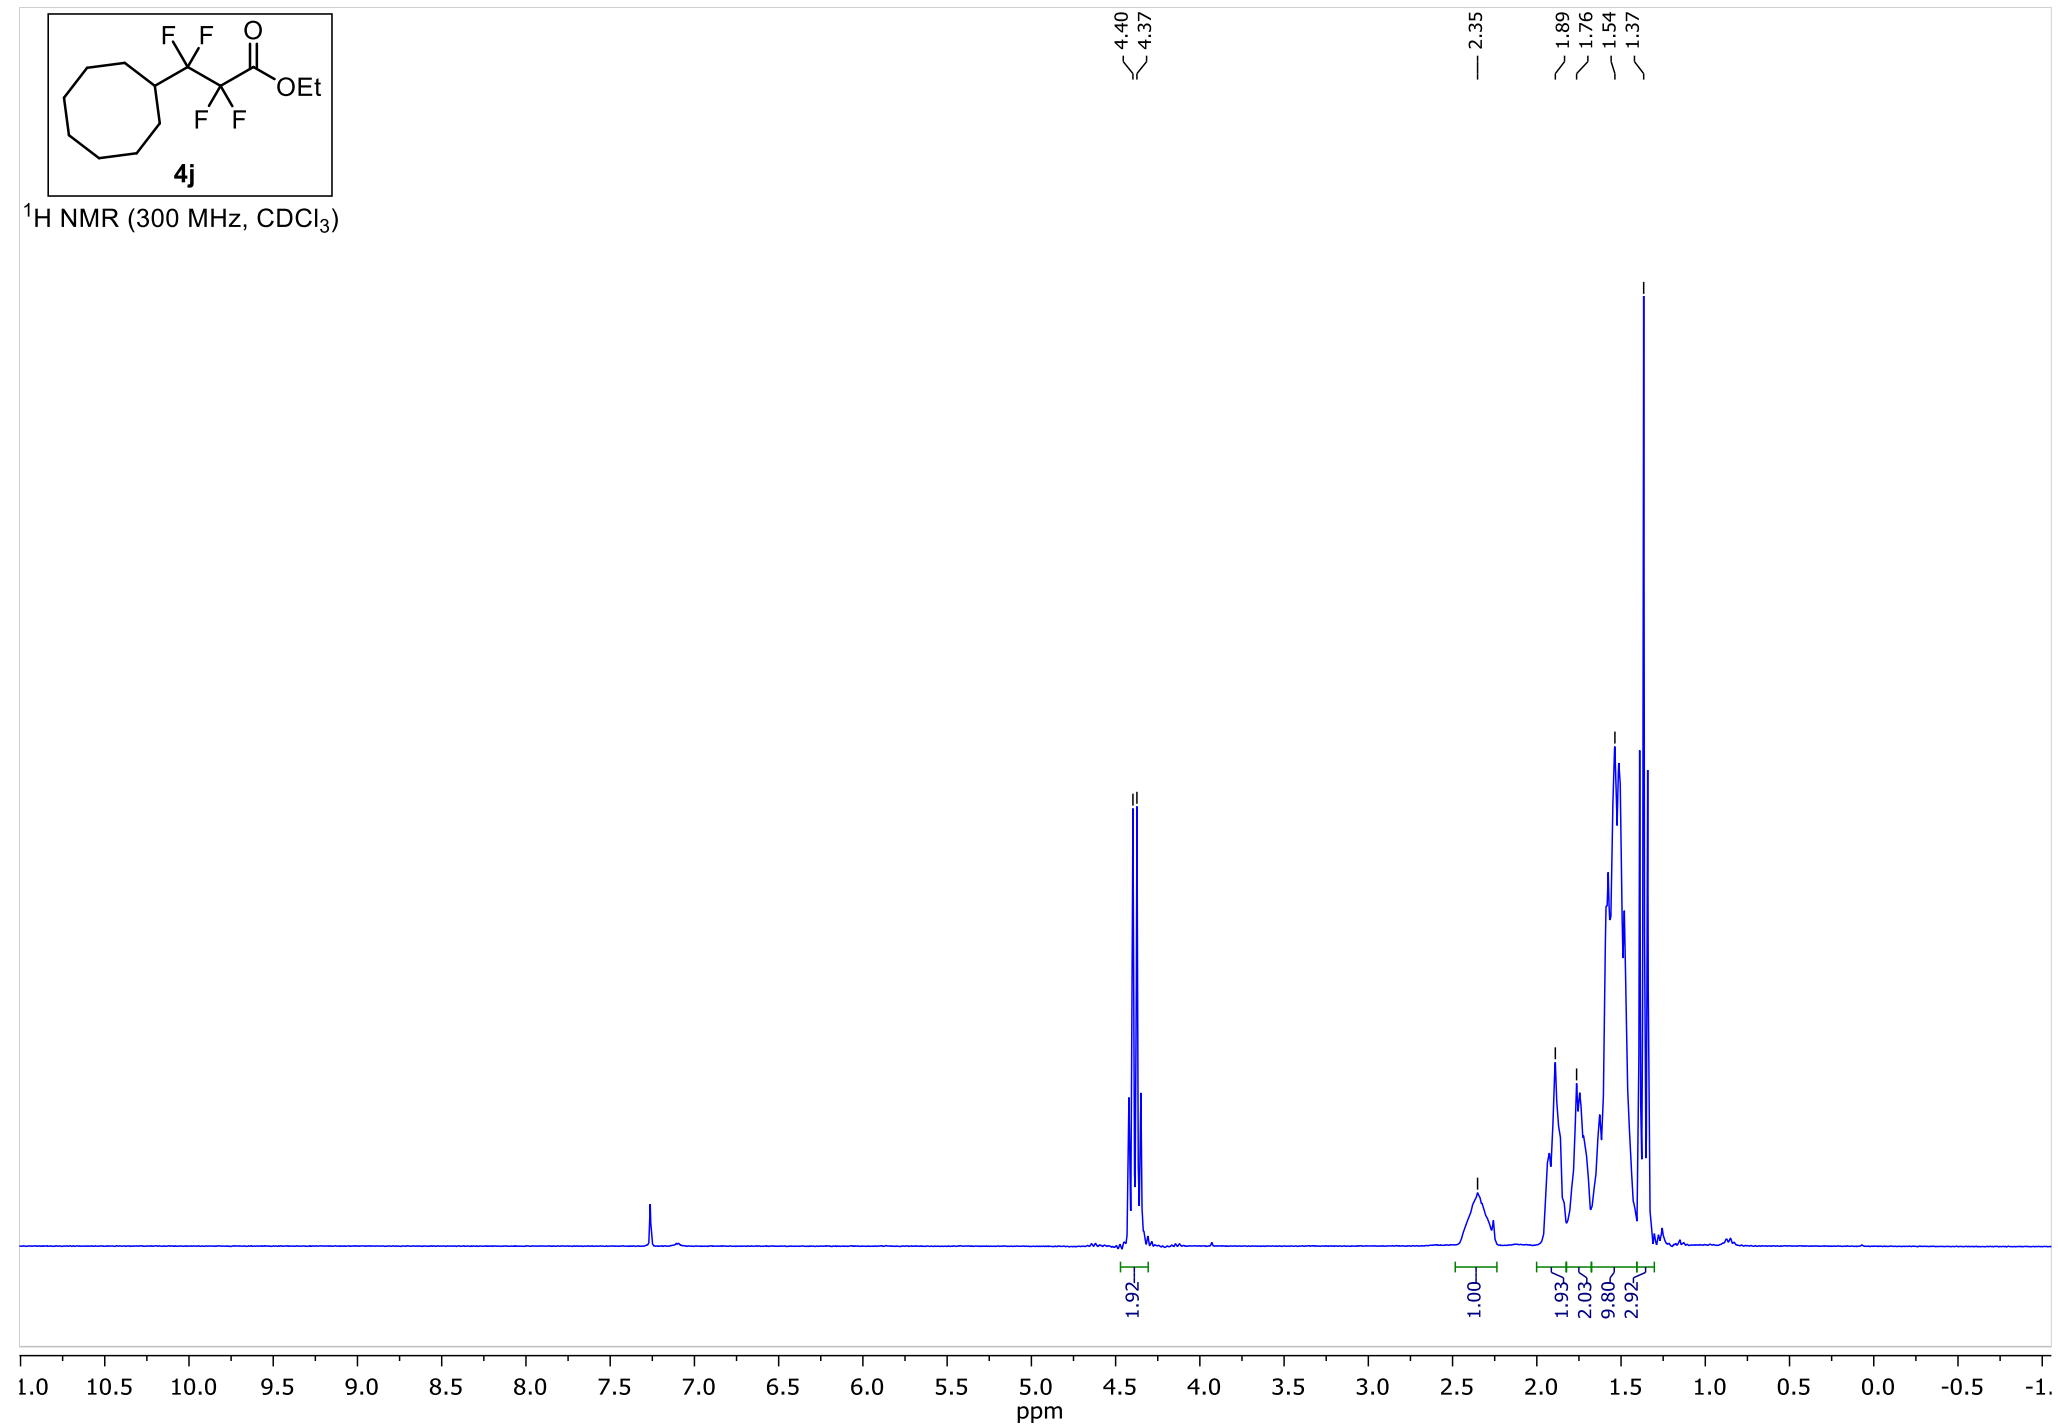

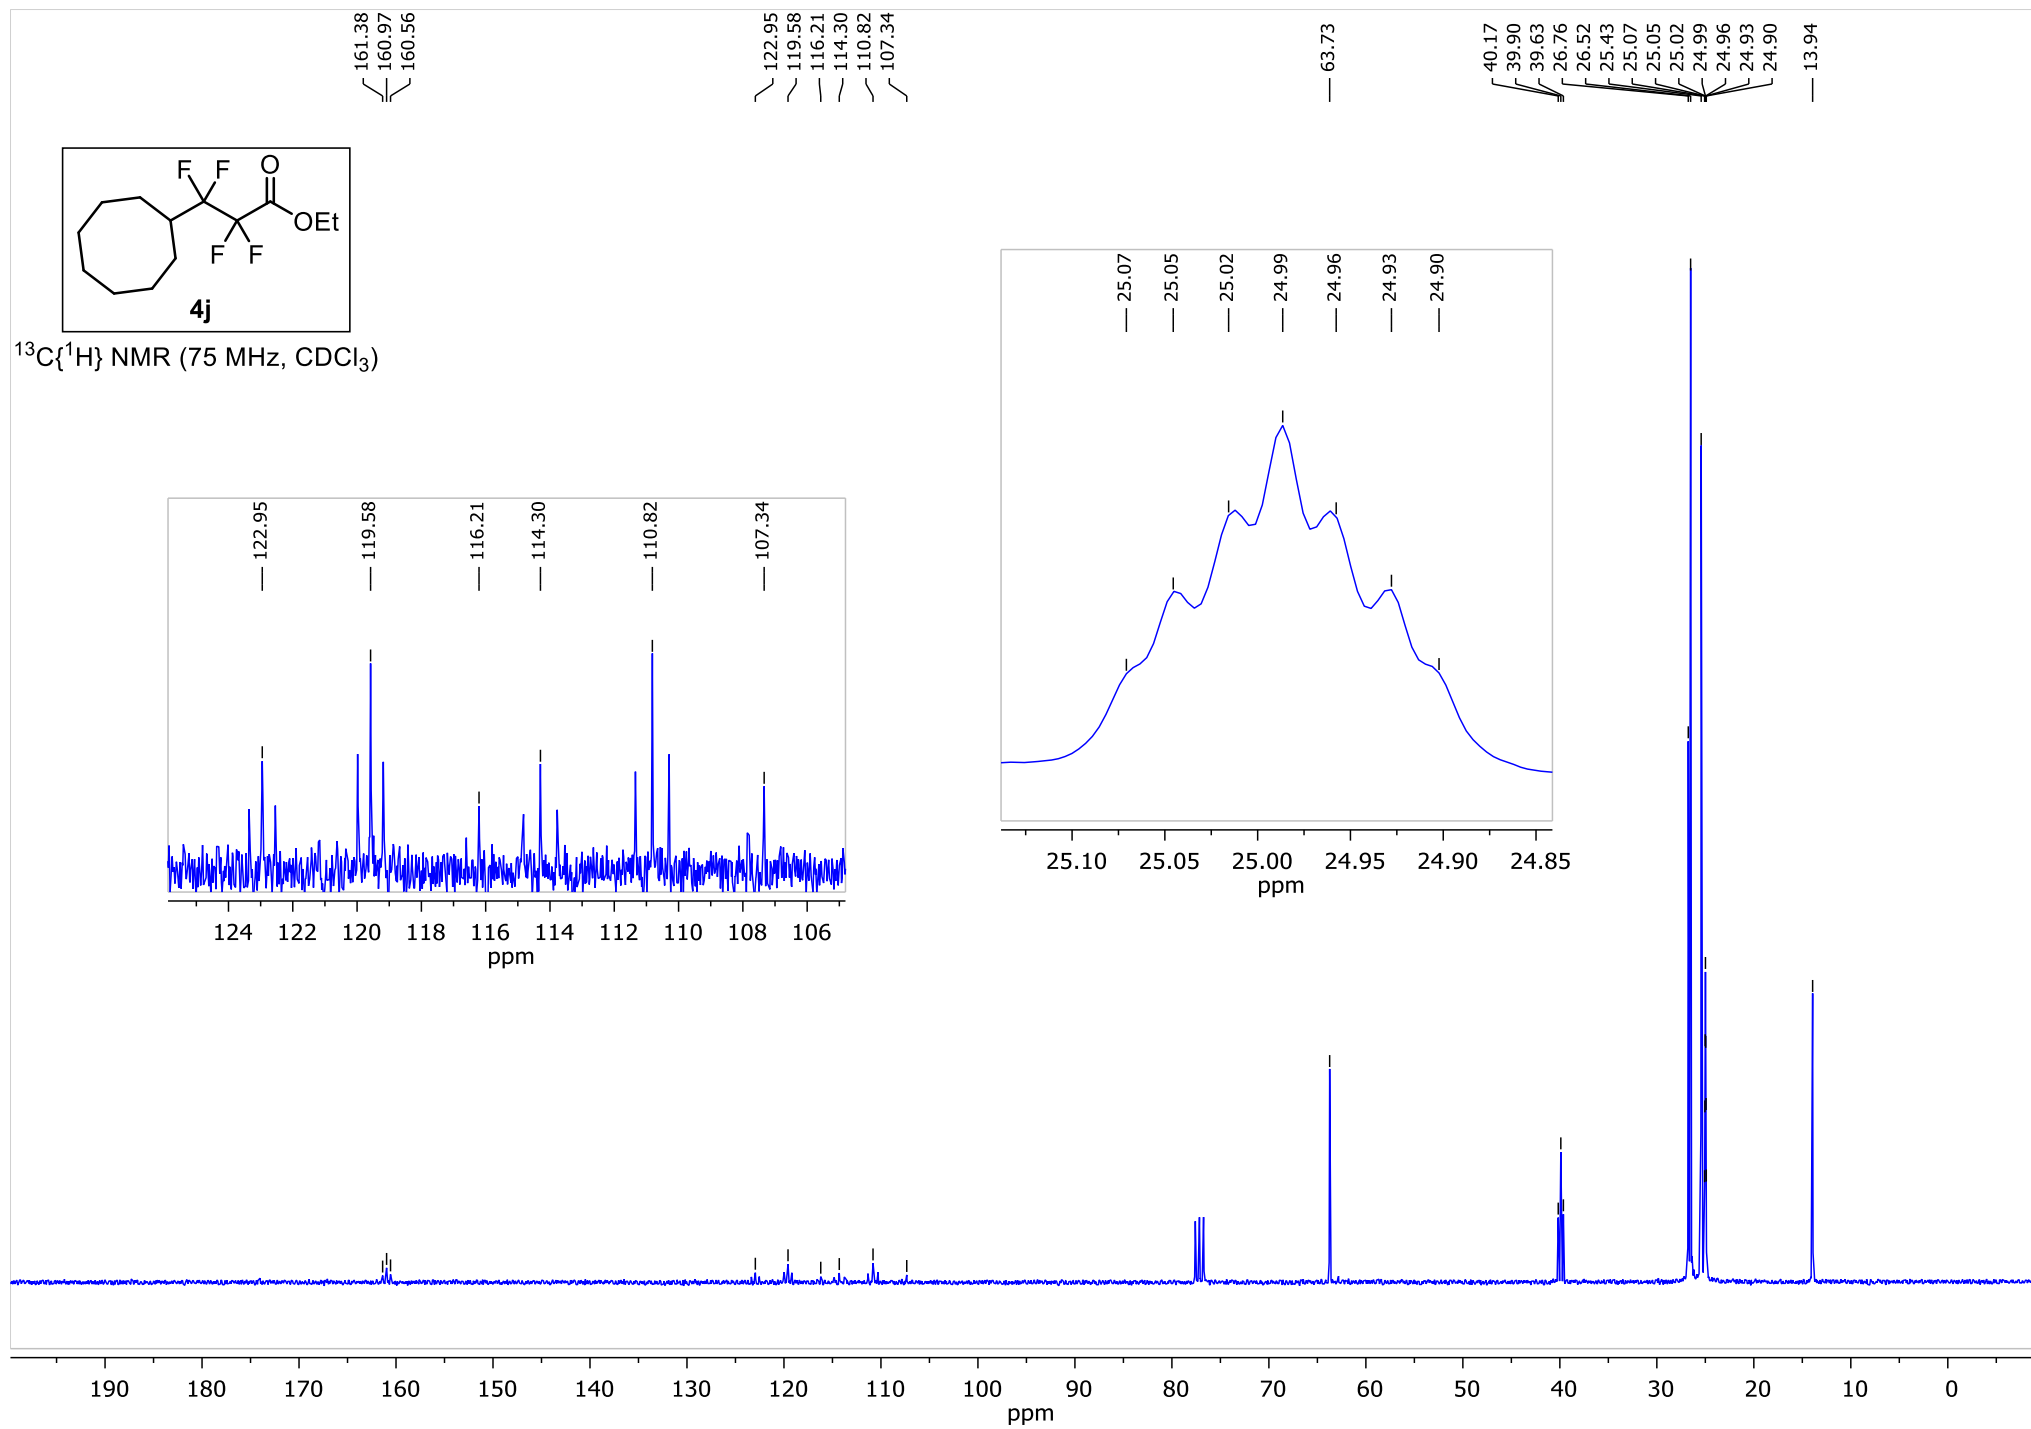



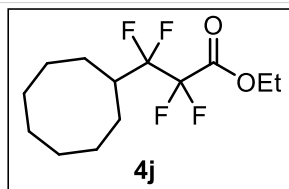

$^{19}\text{F}$  NMR (282 MHz,  $\text{CDCl}_3$ )

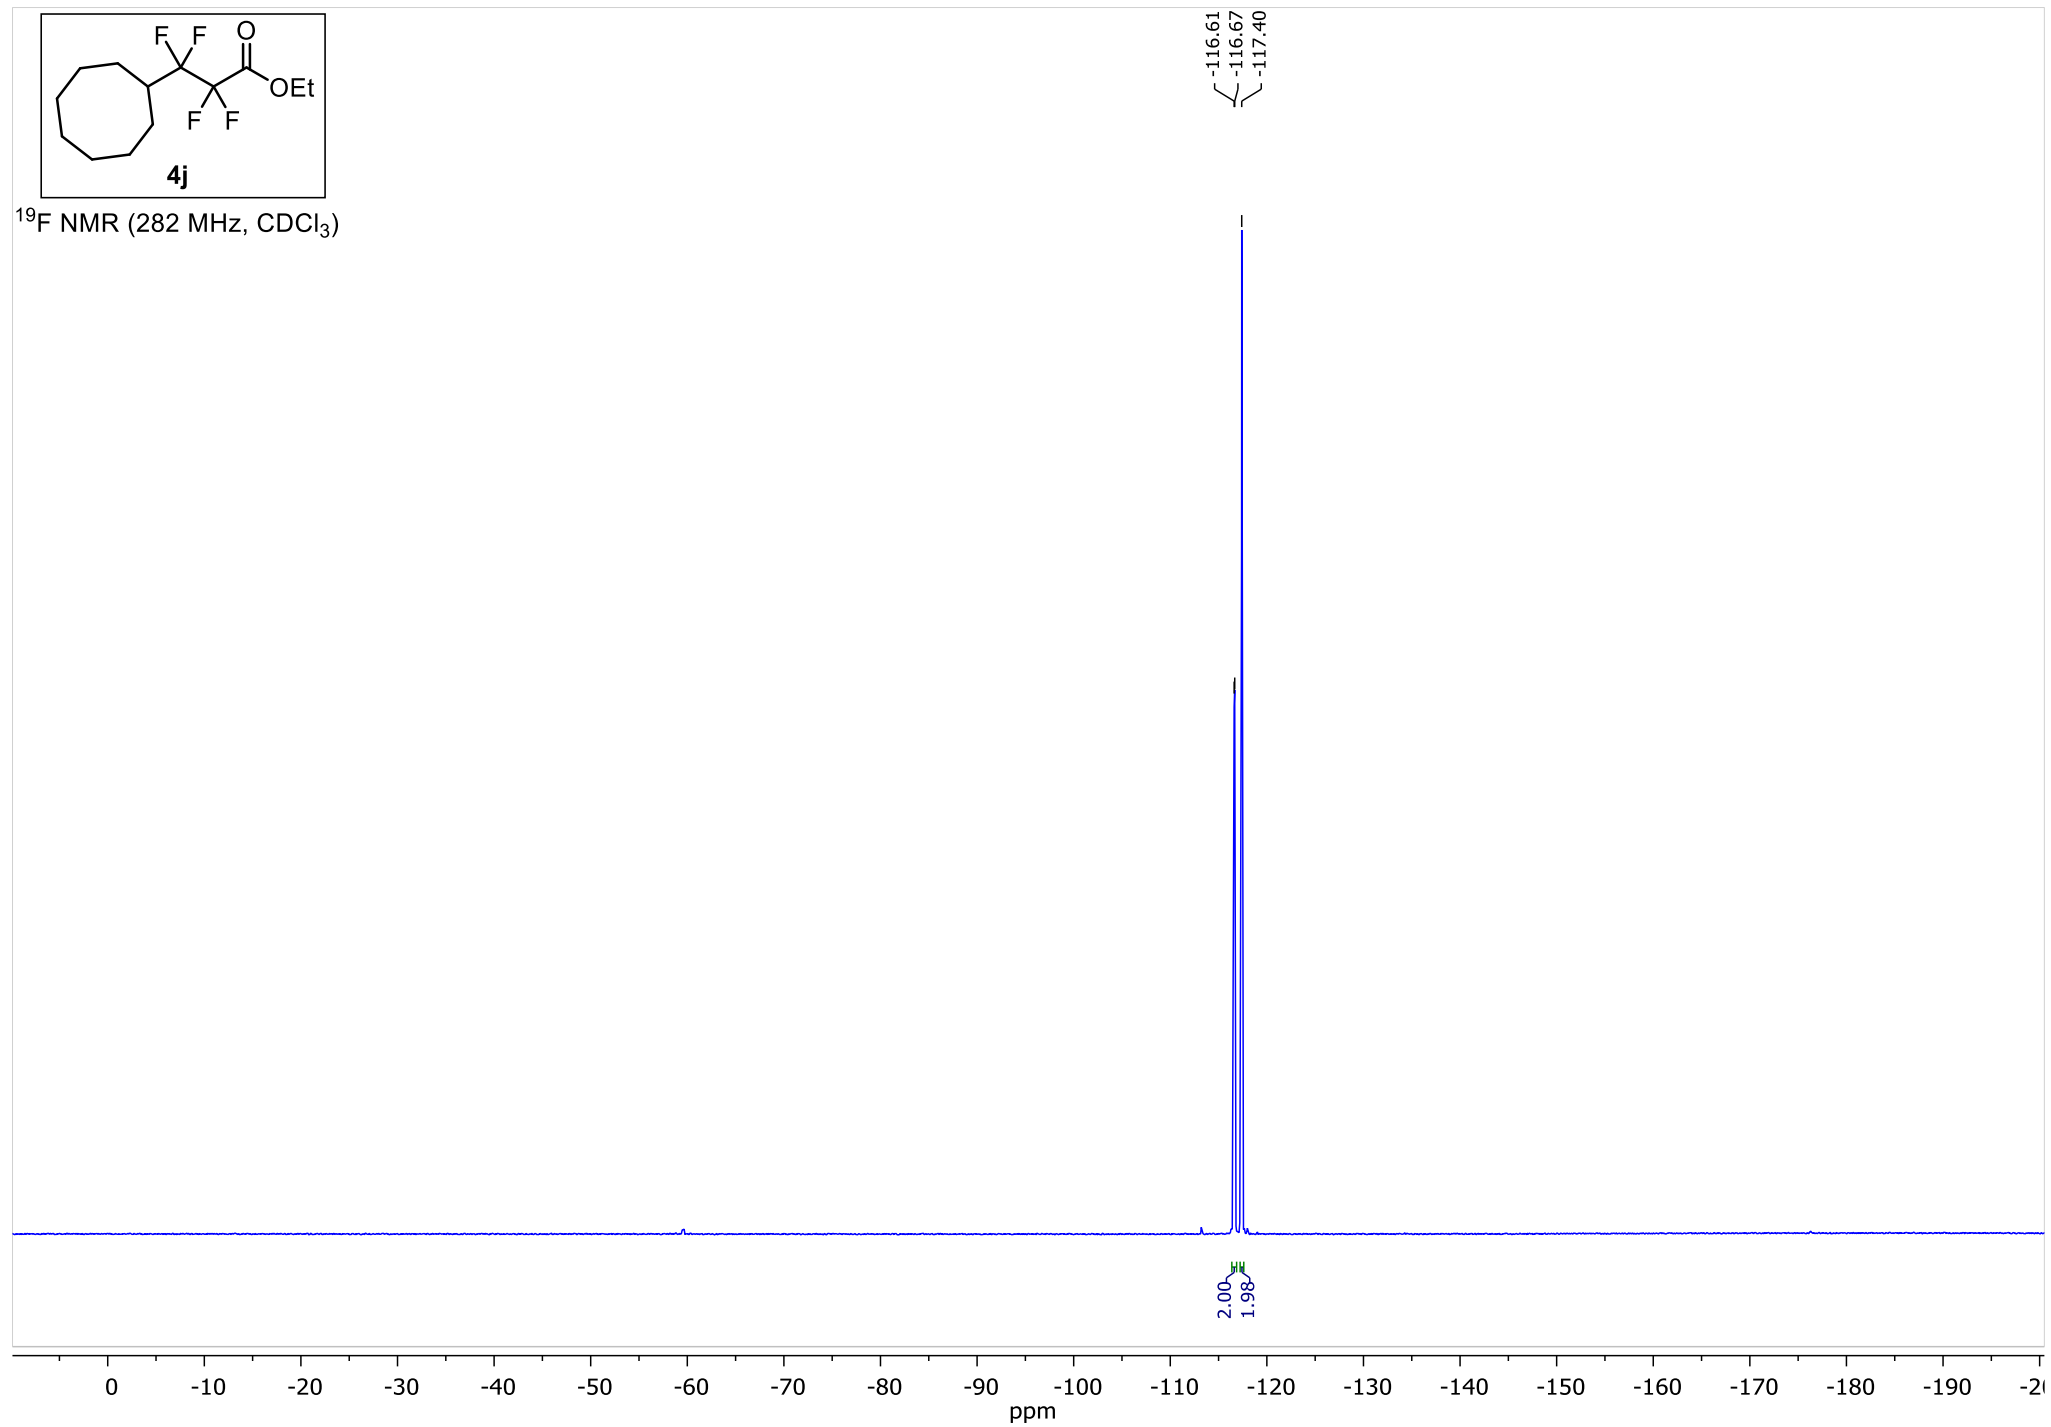

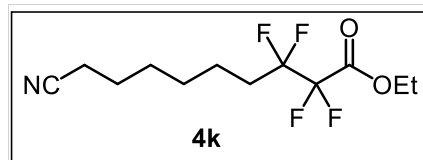

$^1\text{H NMR}$  (300 MHz,  $\text{CDCl}_3$ )

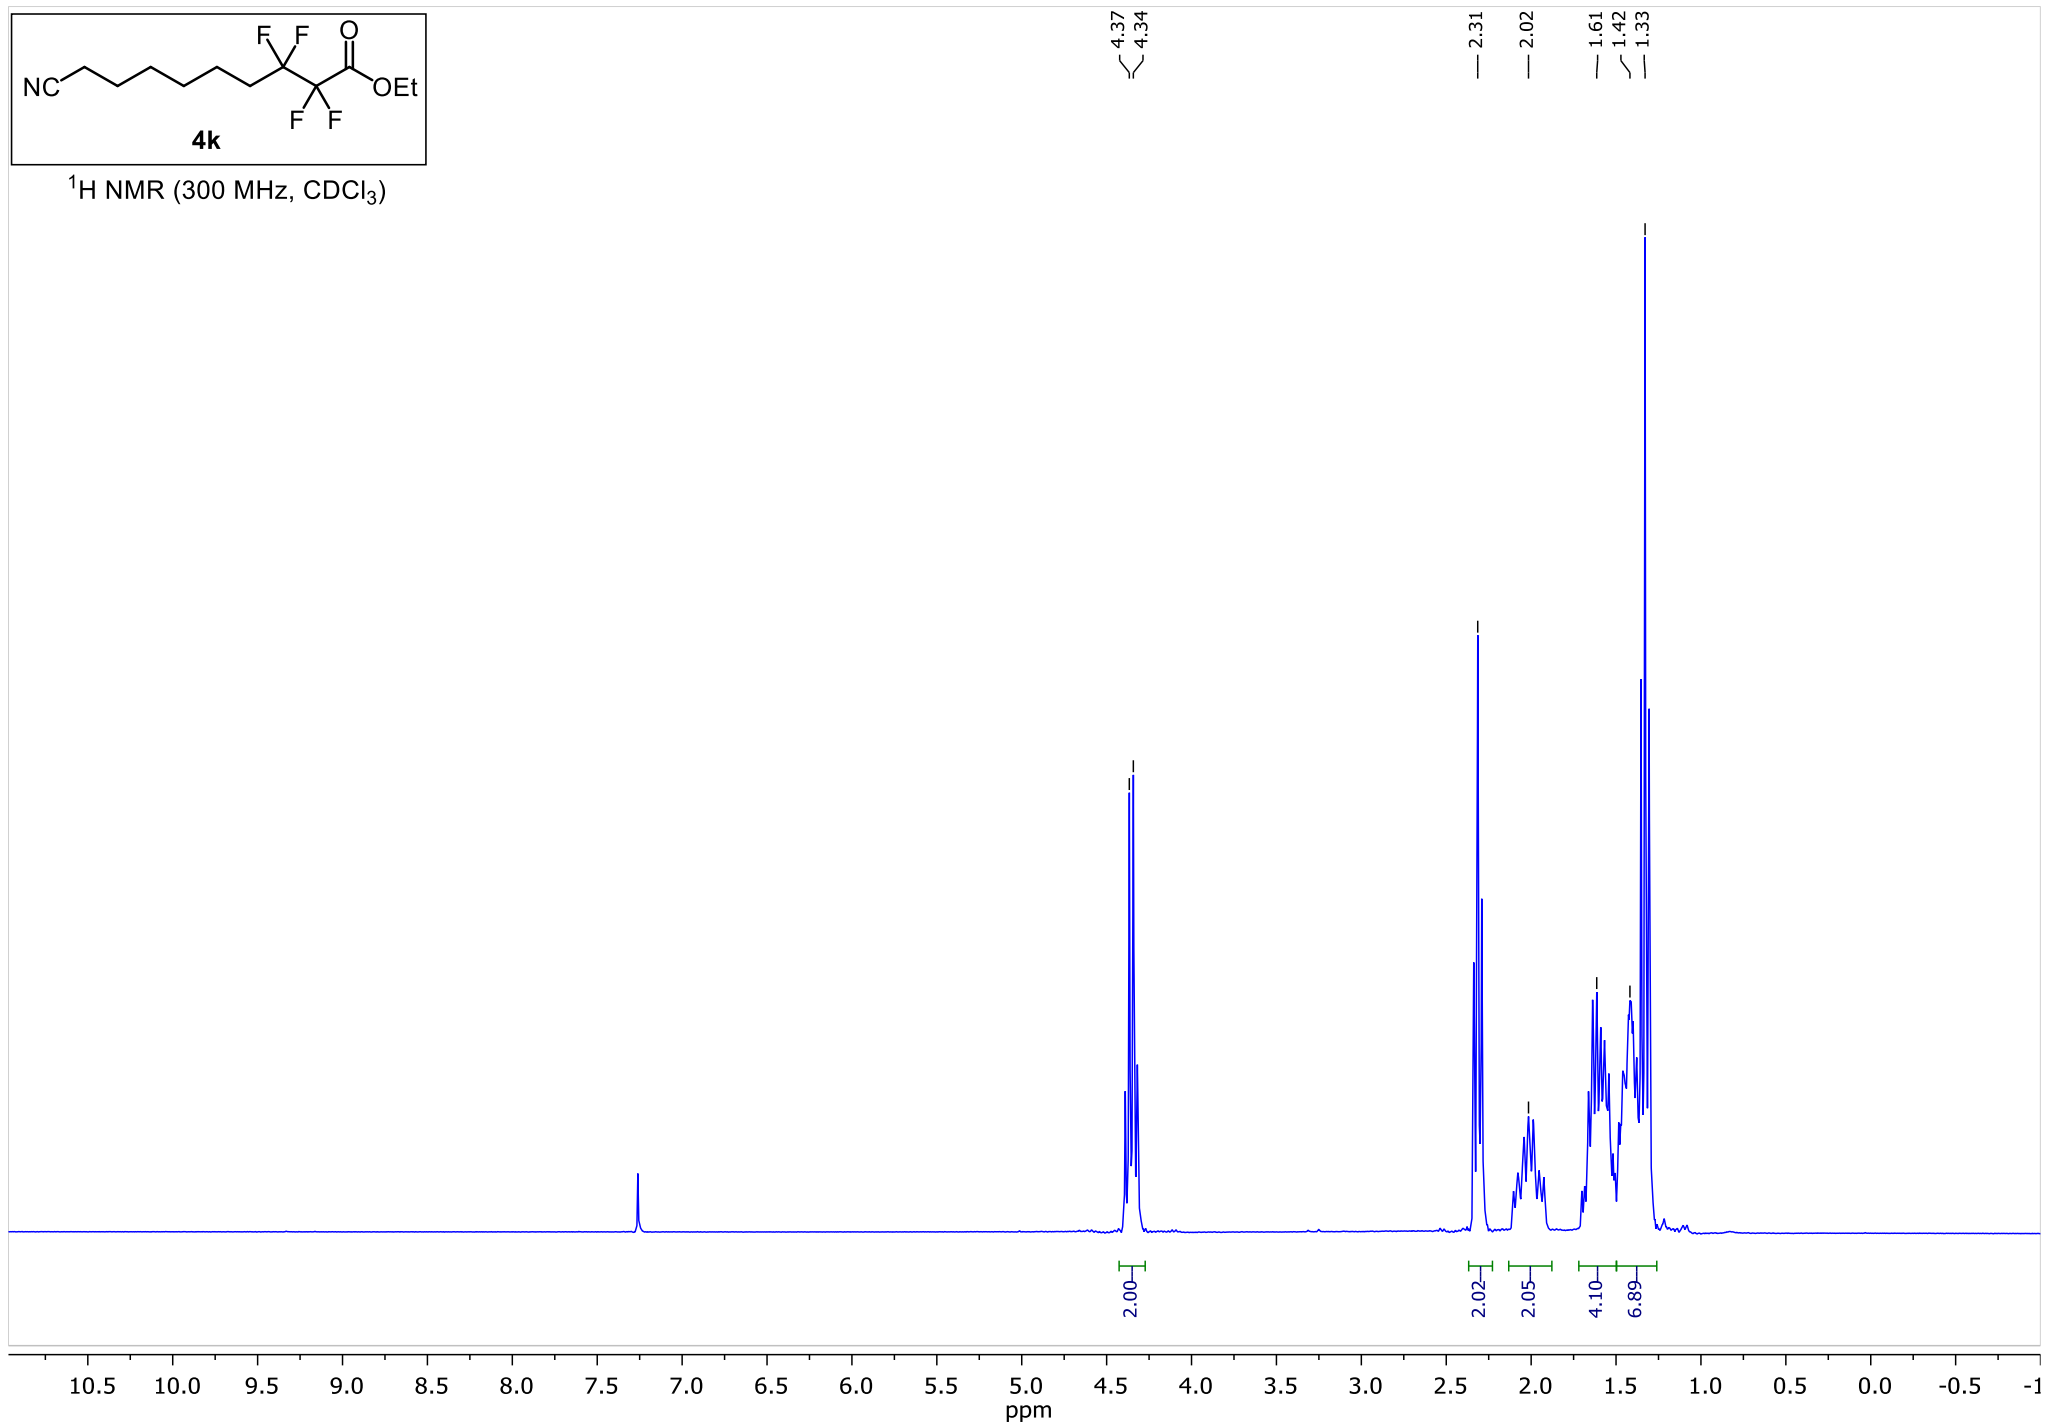

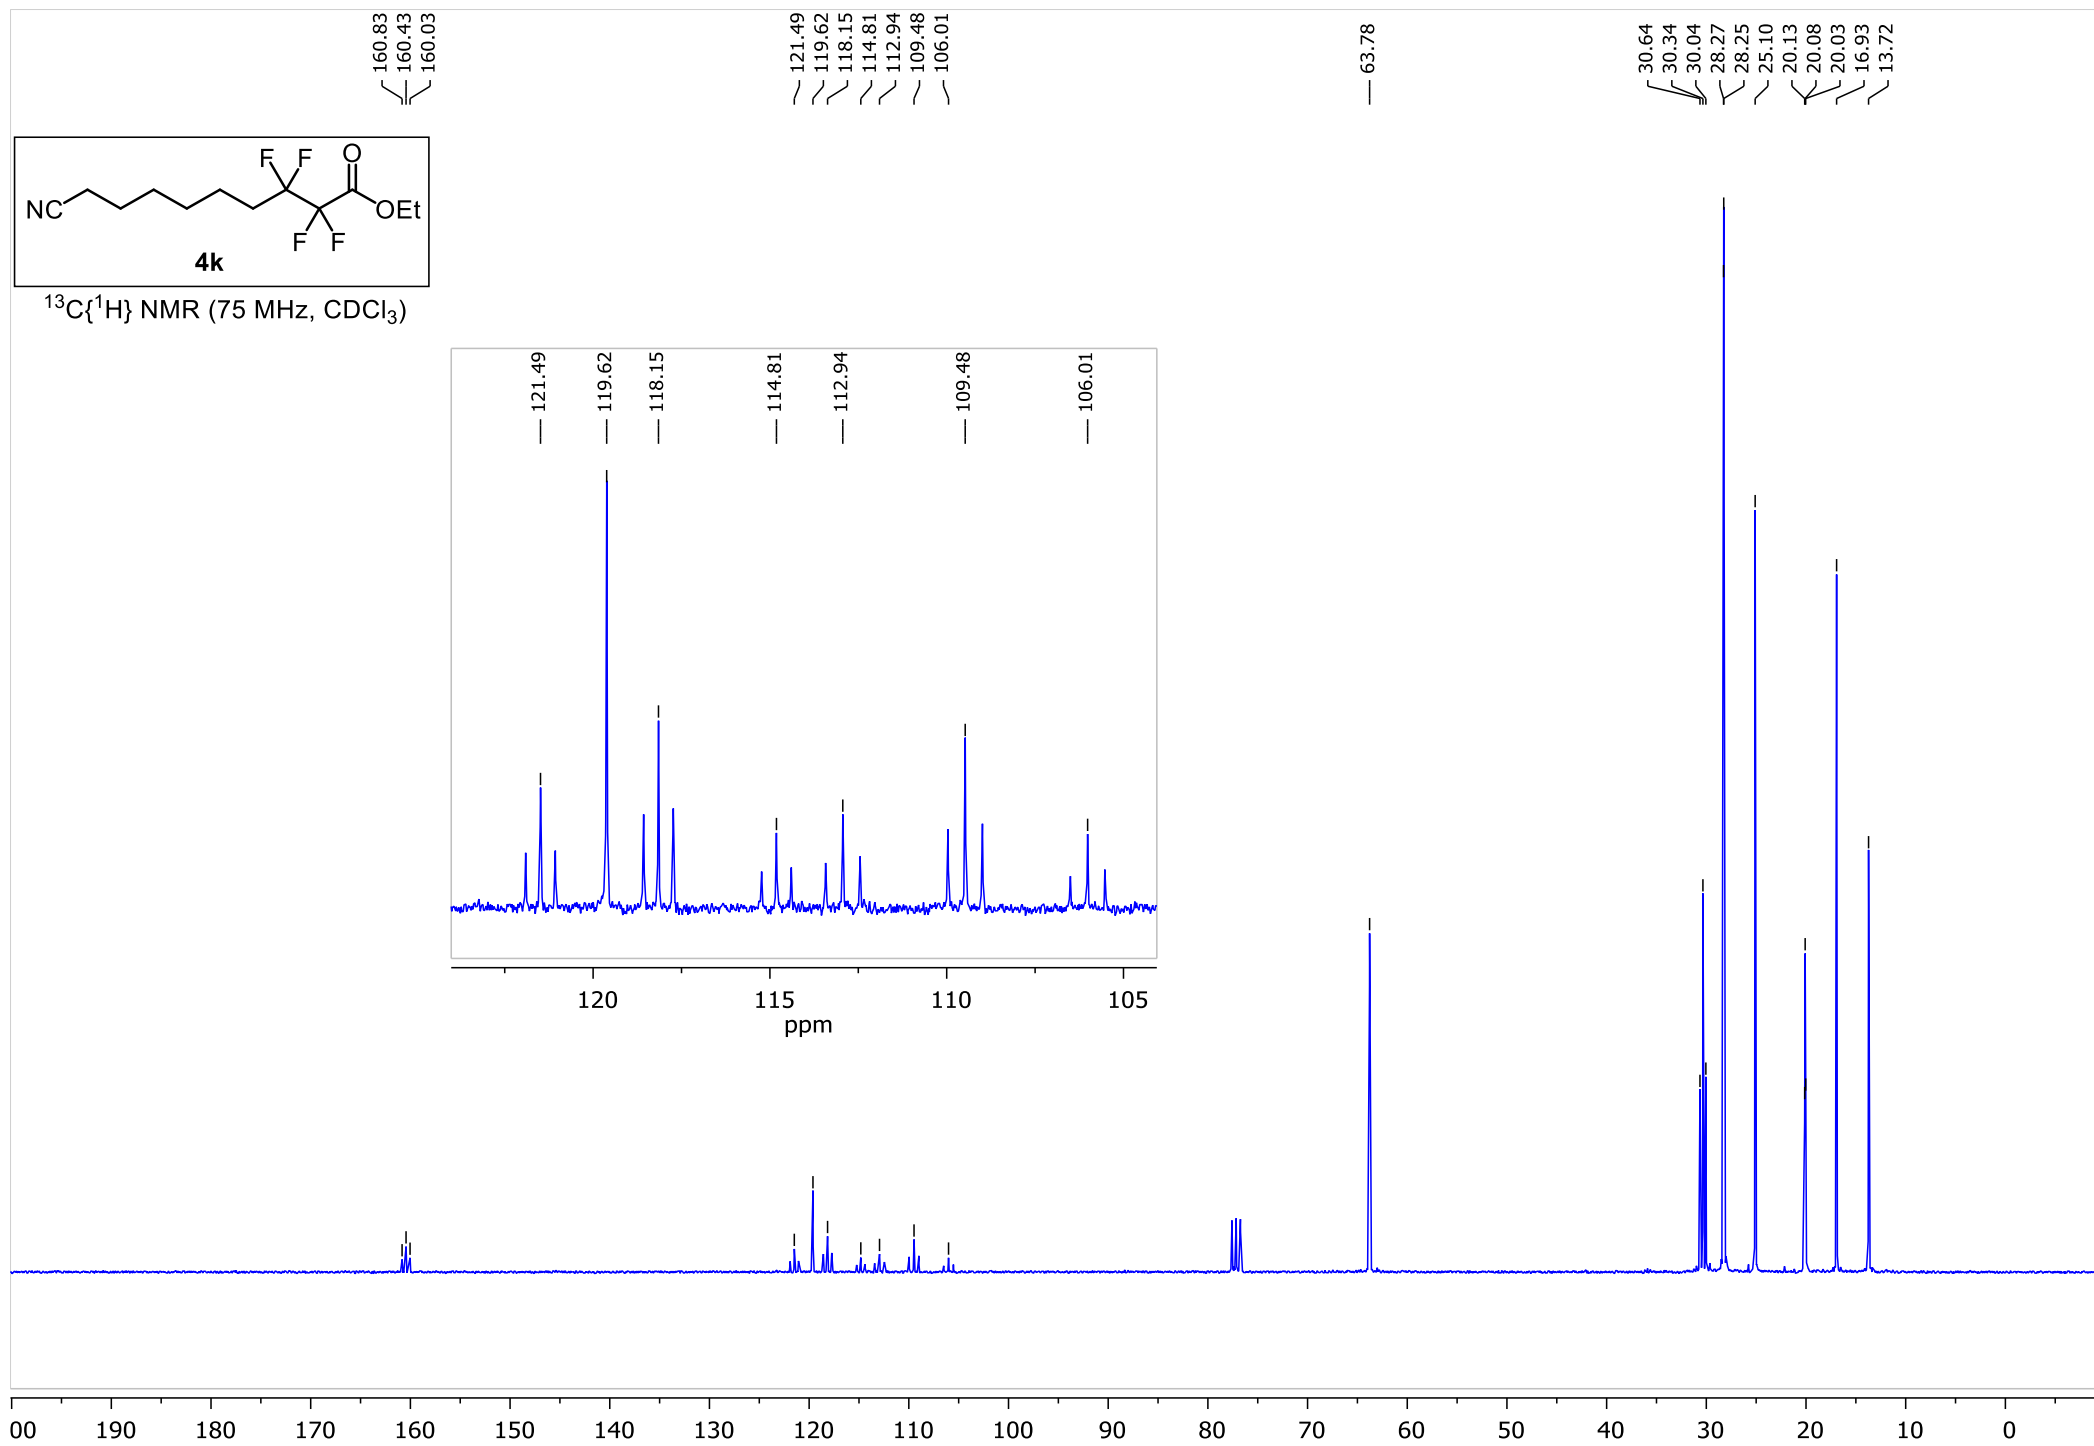

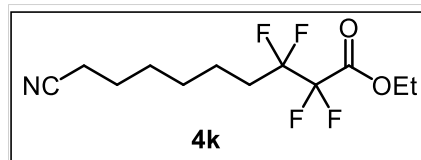

<sup>19</sup>F NMR (282 MHz, CDCl<sub>3</sub>)

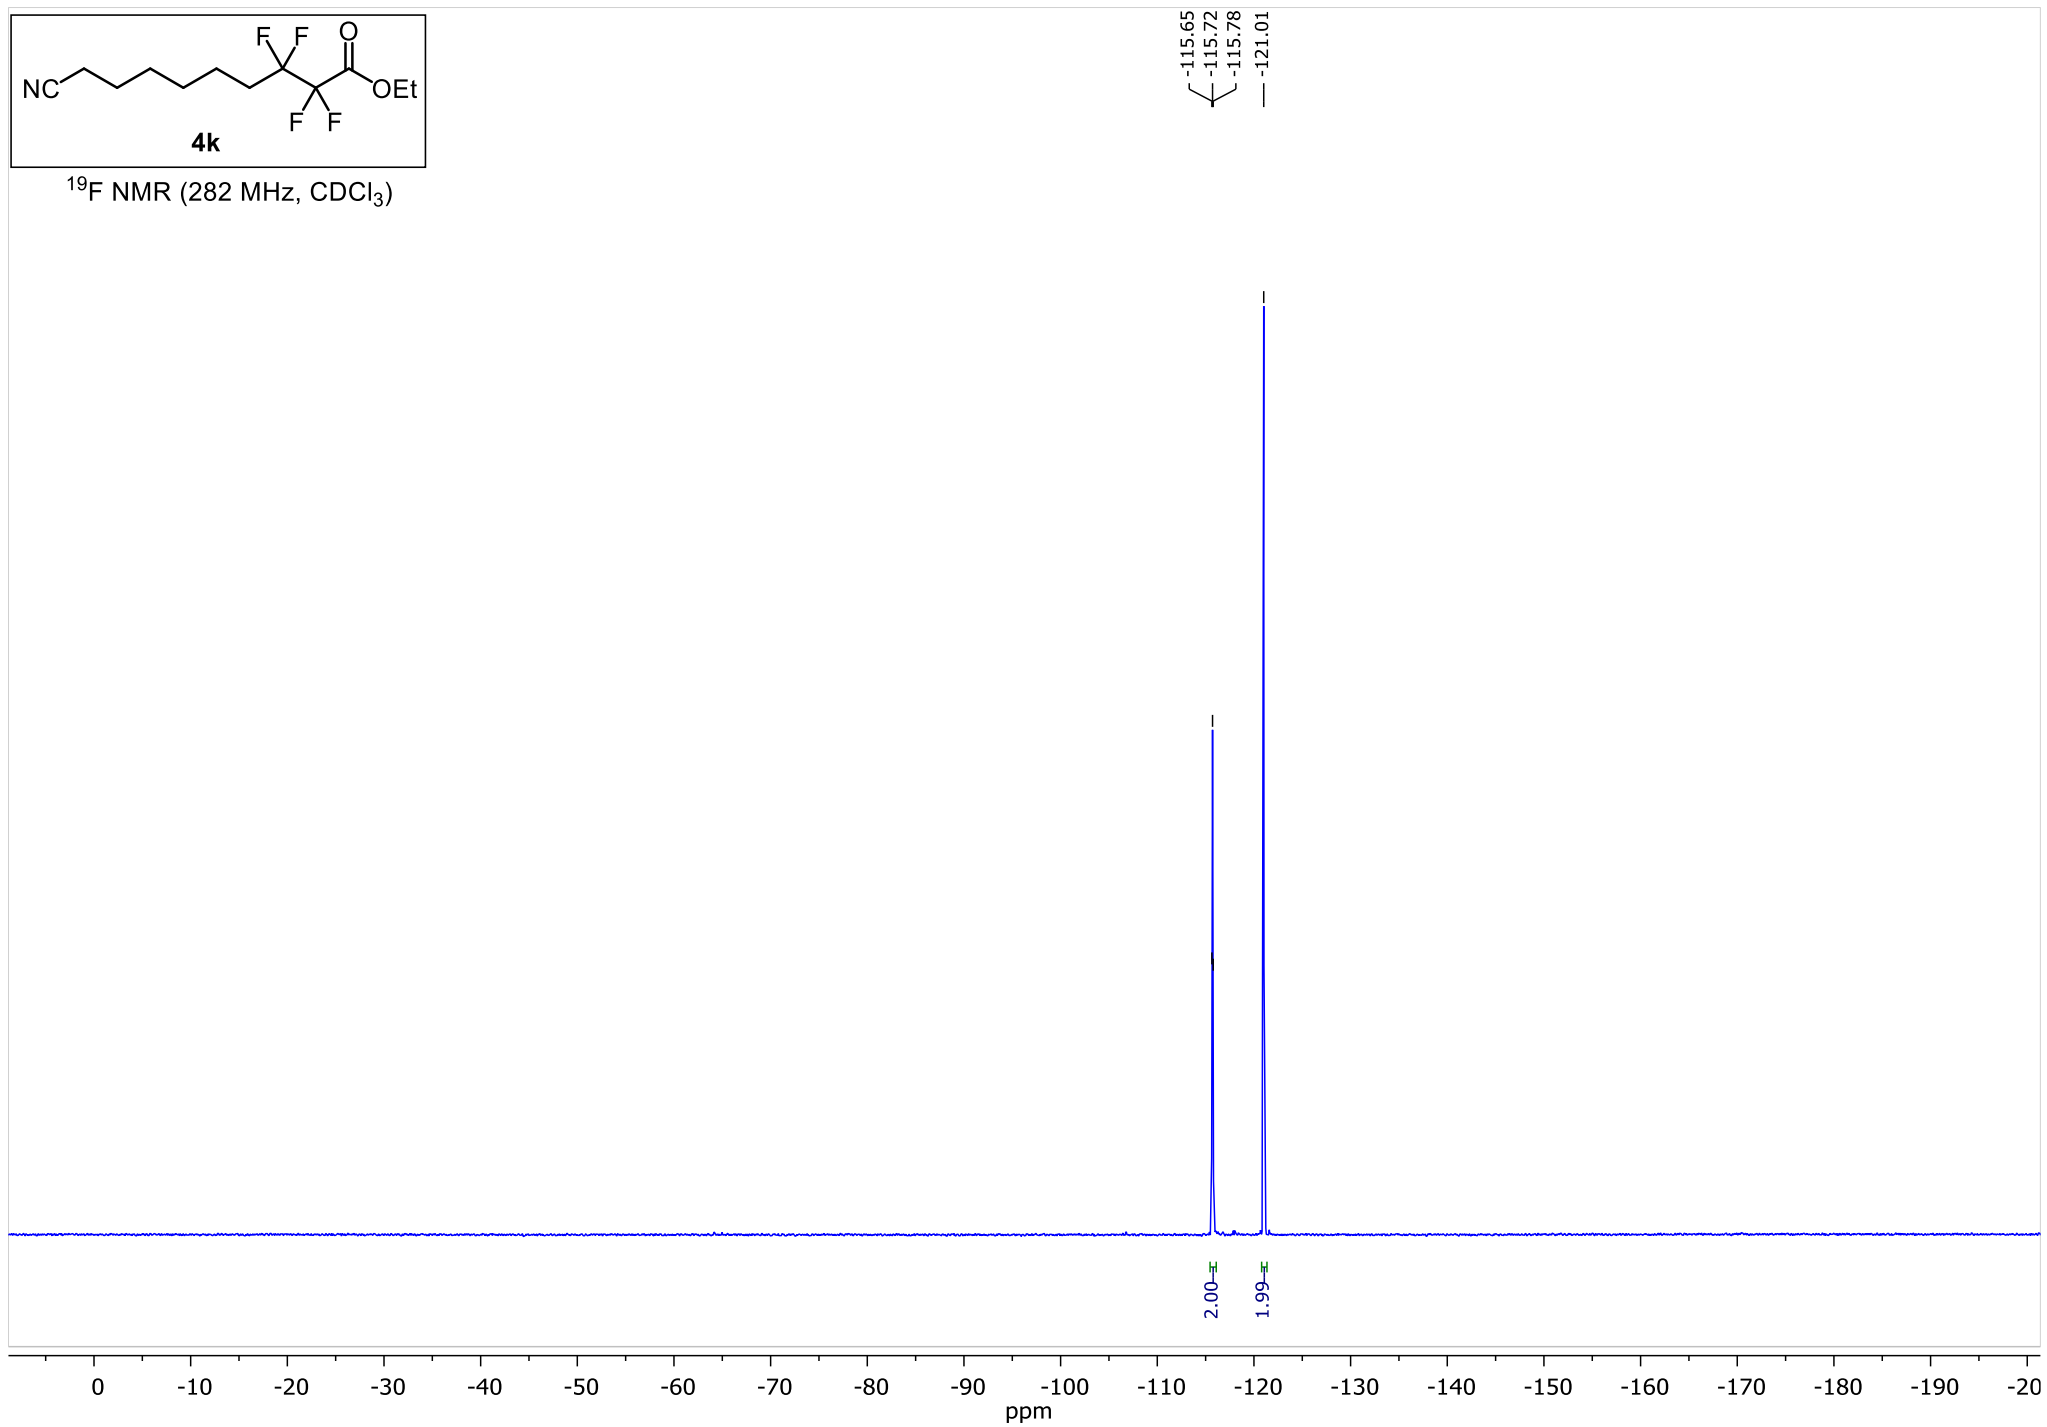

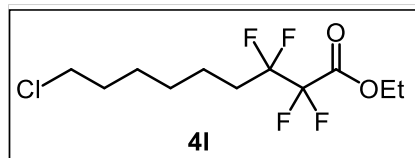

$^1\text{H NMR}$  (300 MHz,  $\text{CDCl}_3$ )

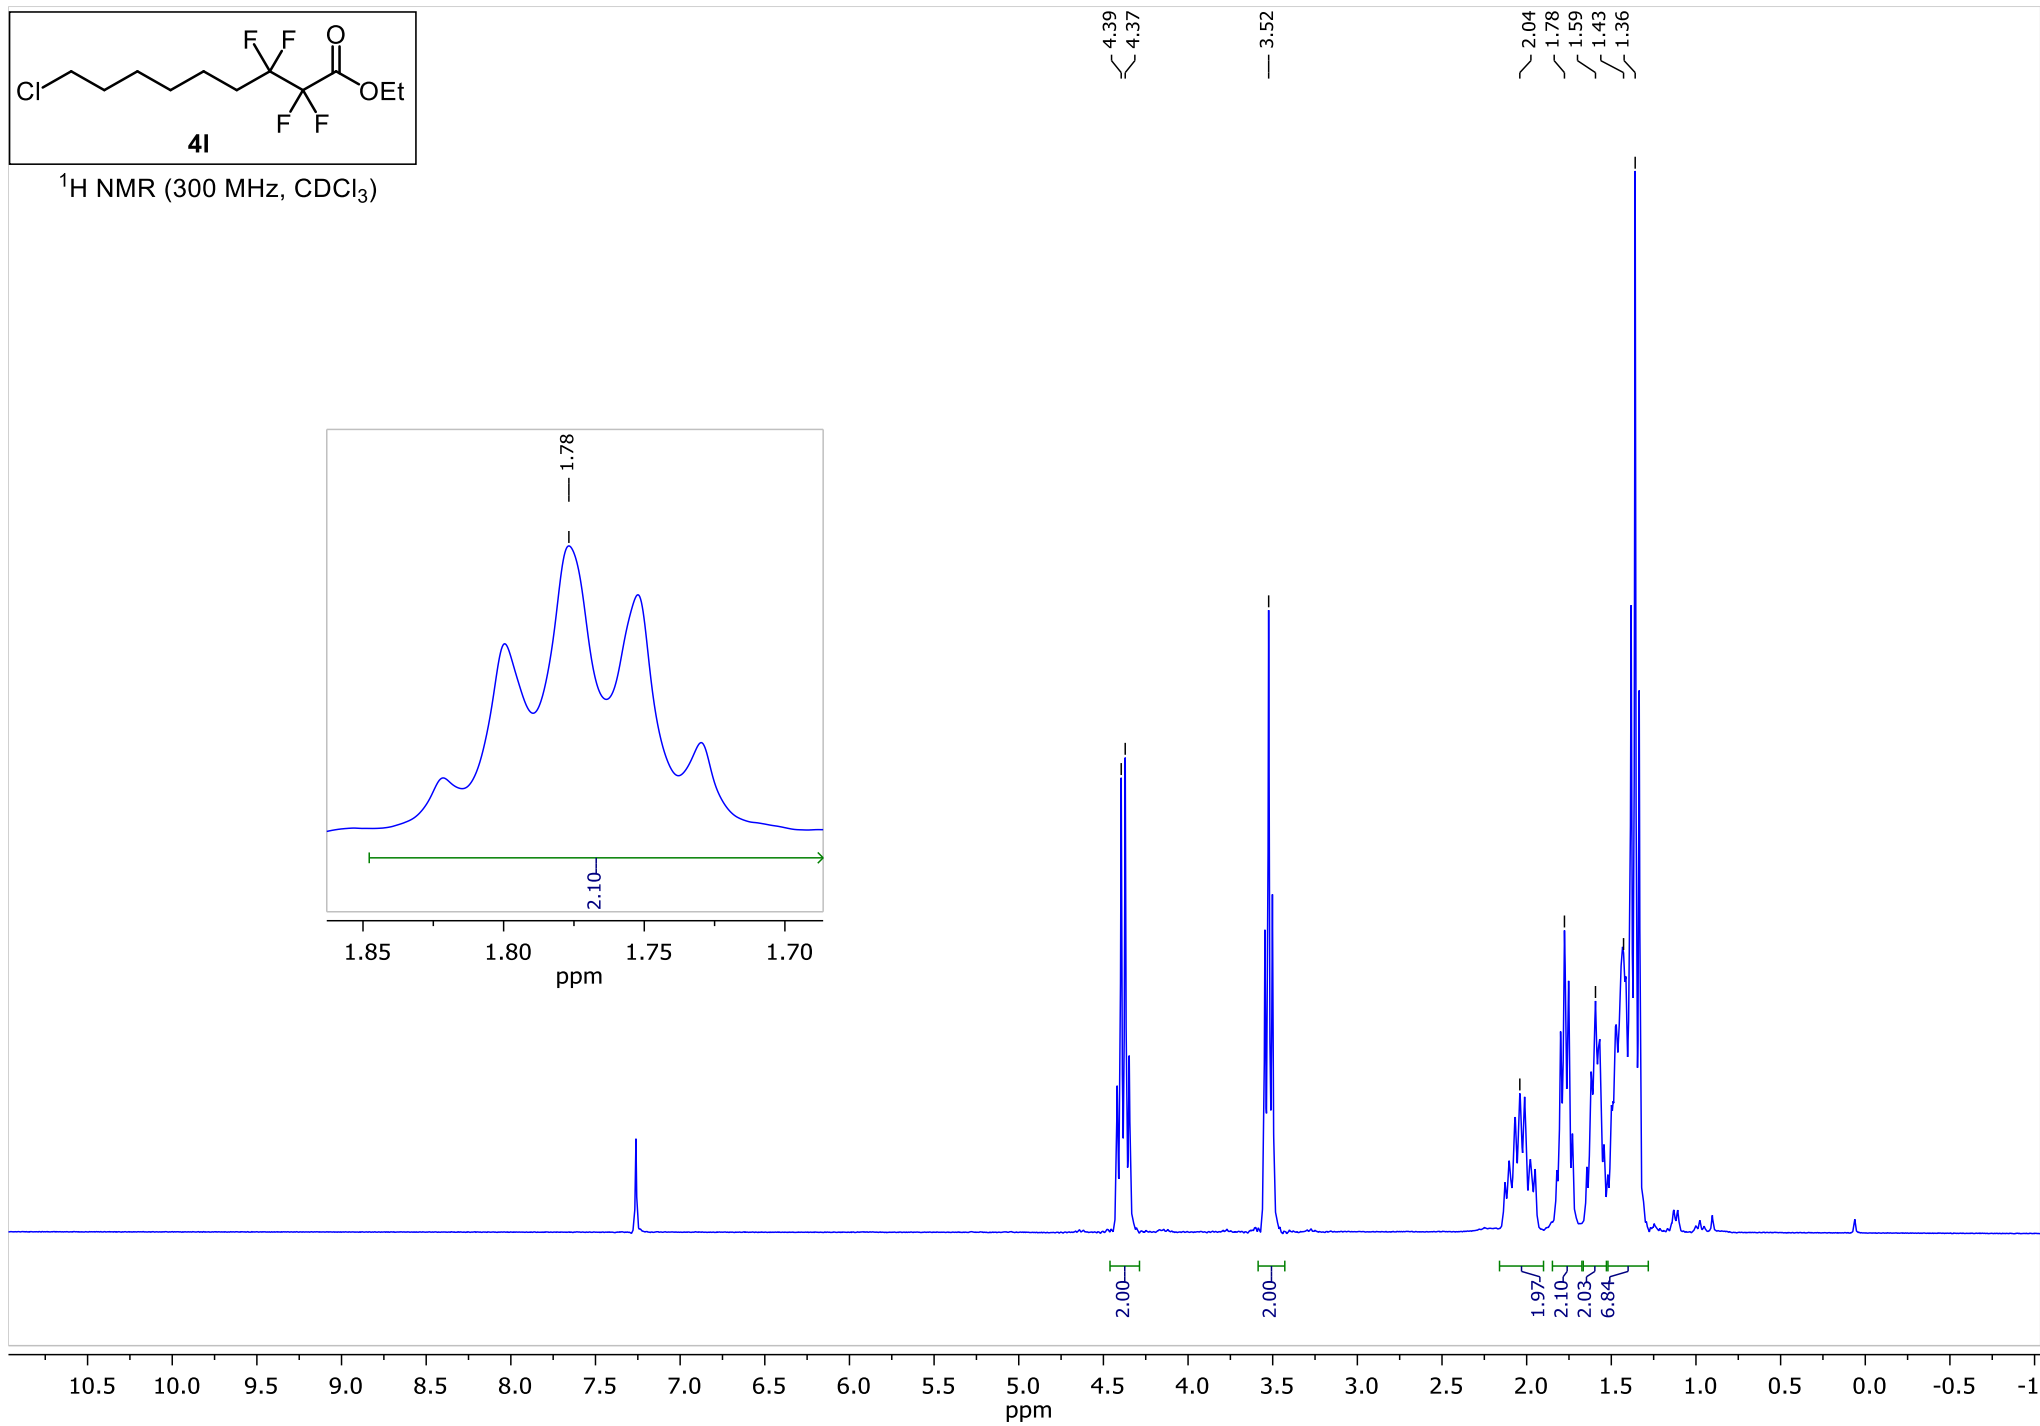

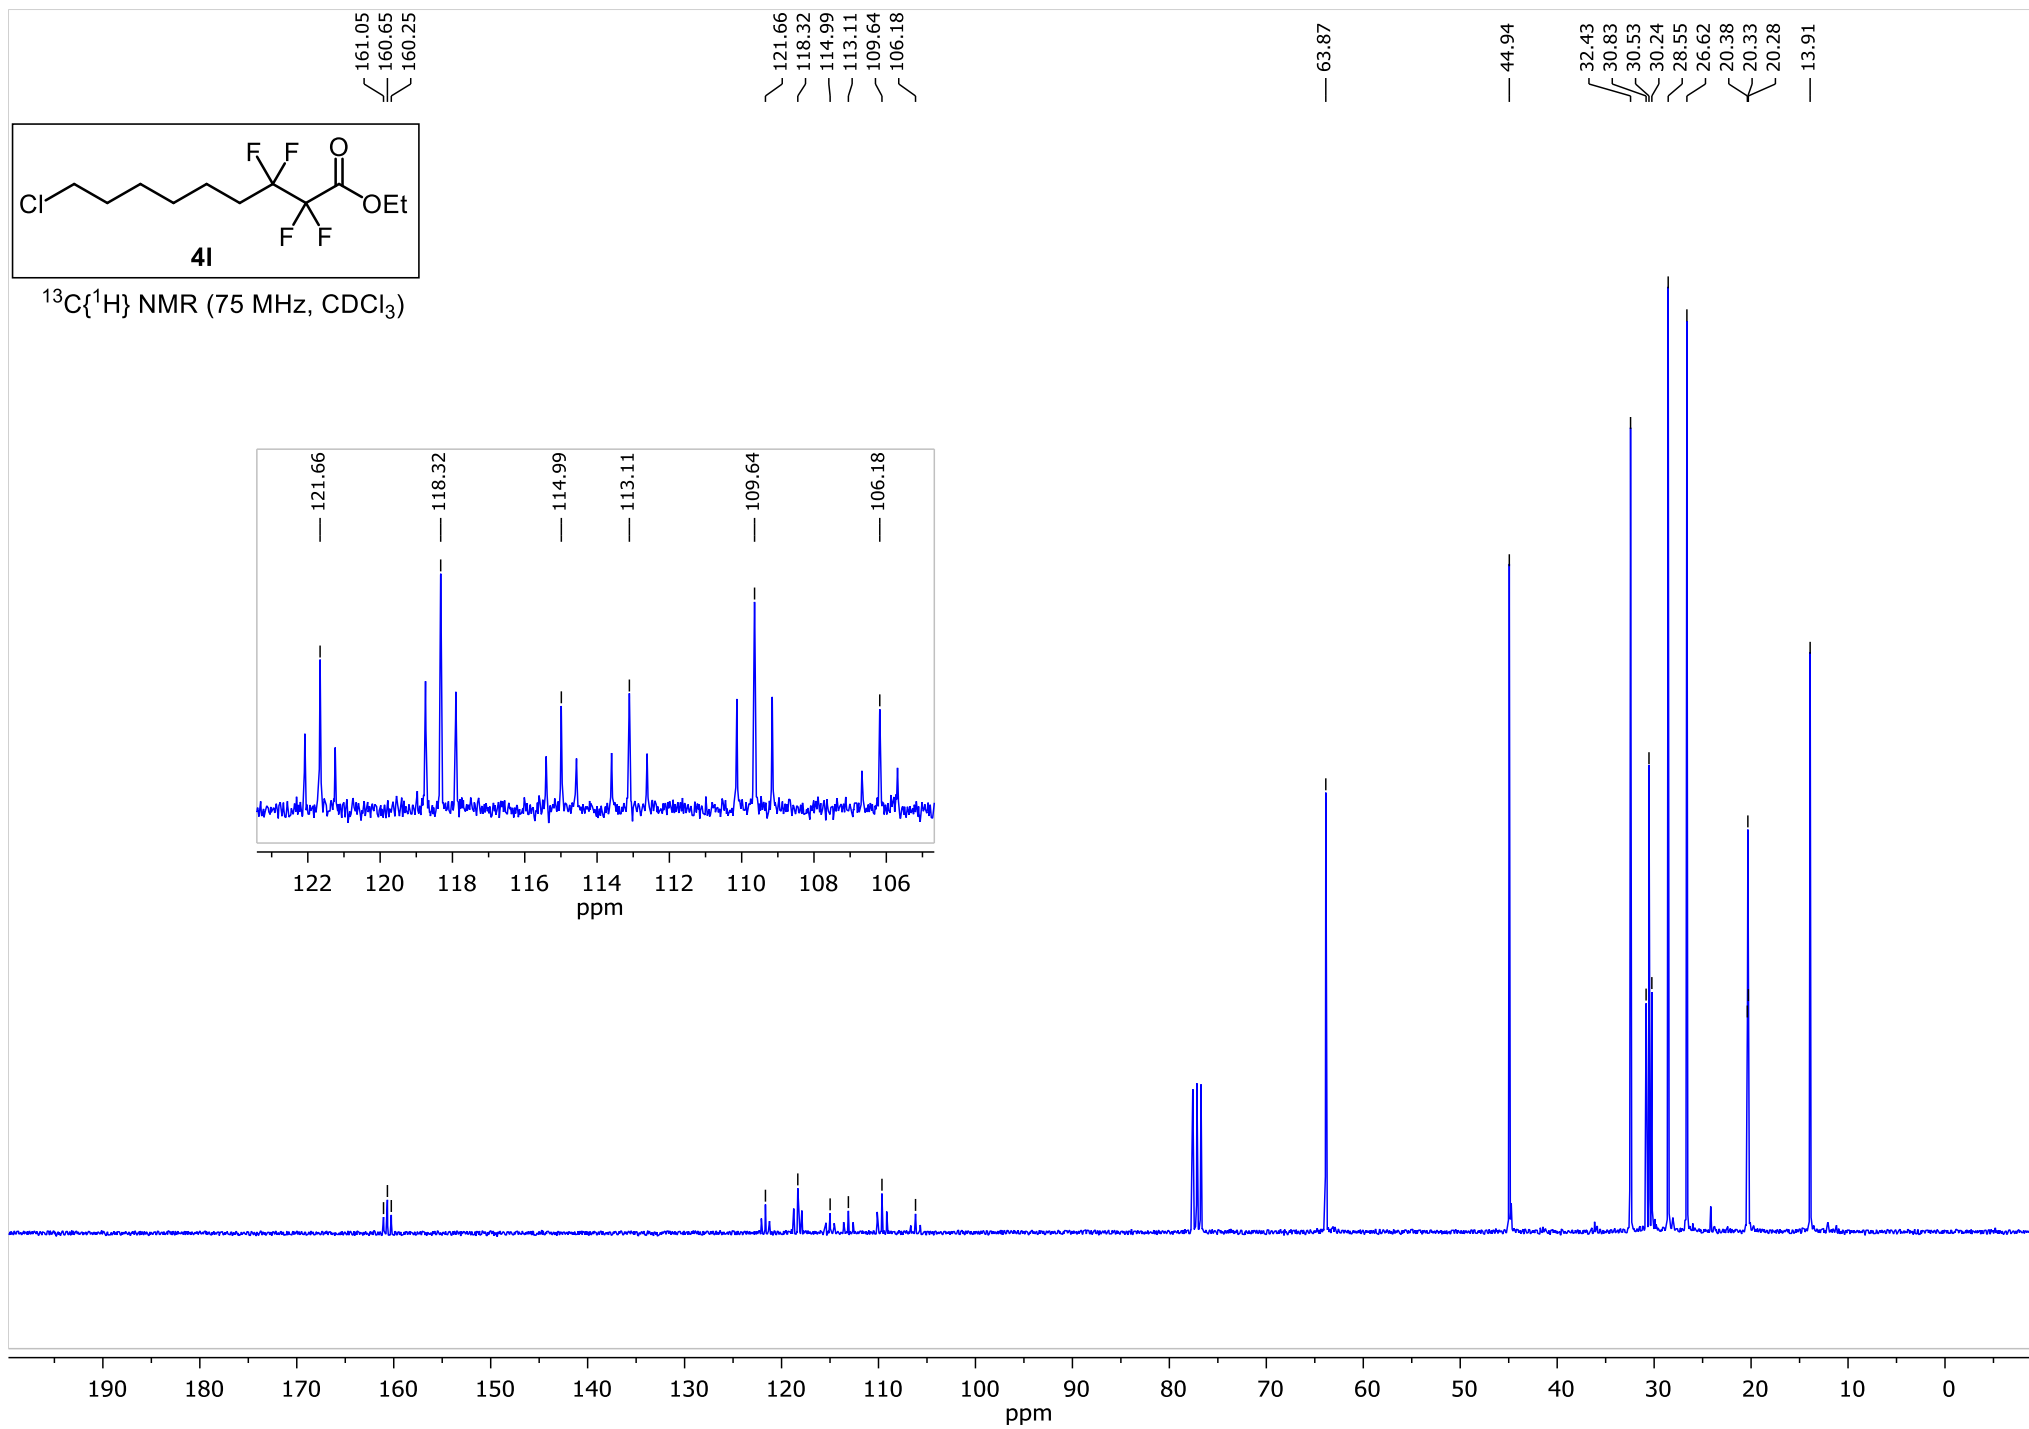

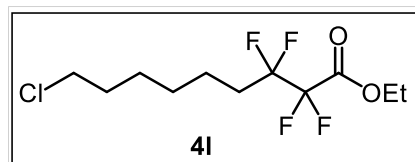

$^{19}\text{F}$  NMR (282 MHz,  $\text{CDCl}_3$ )

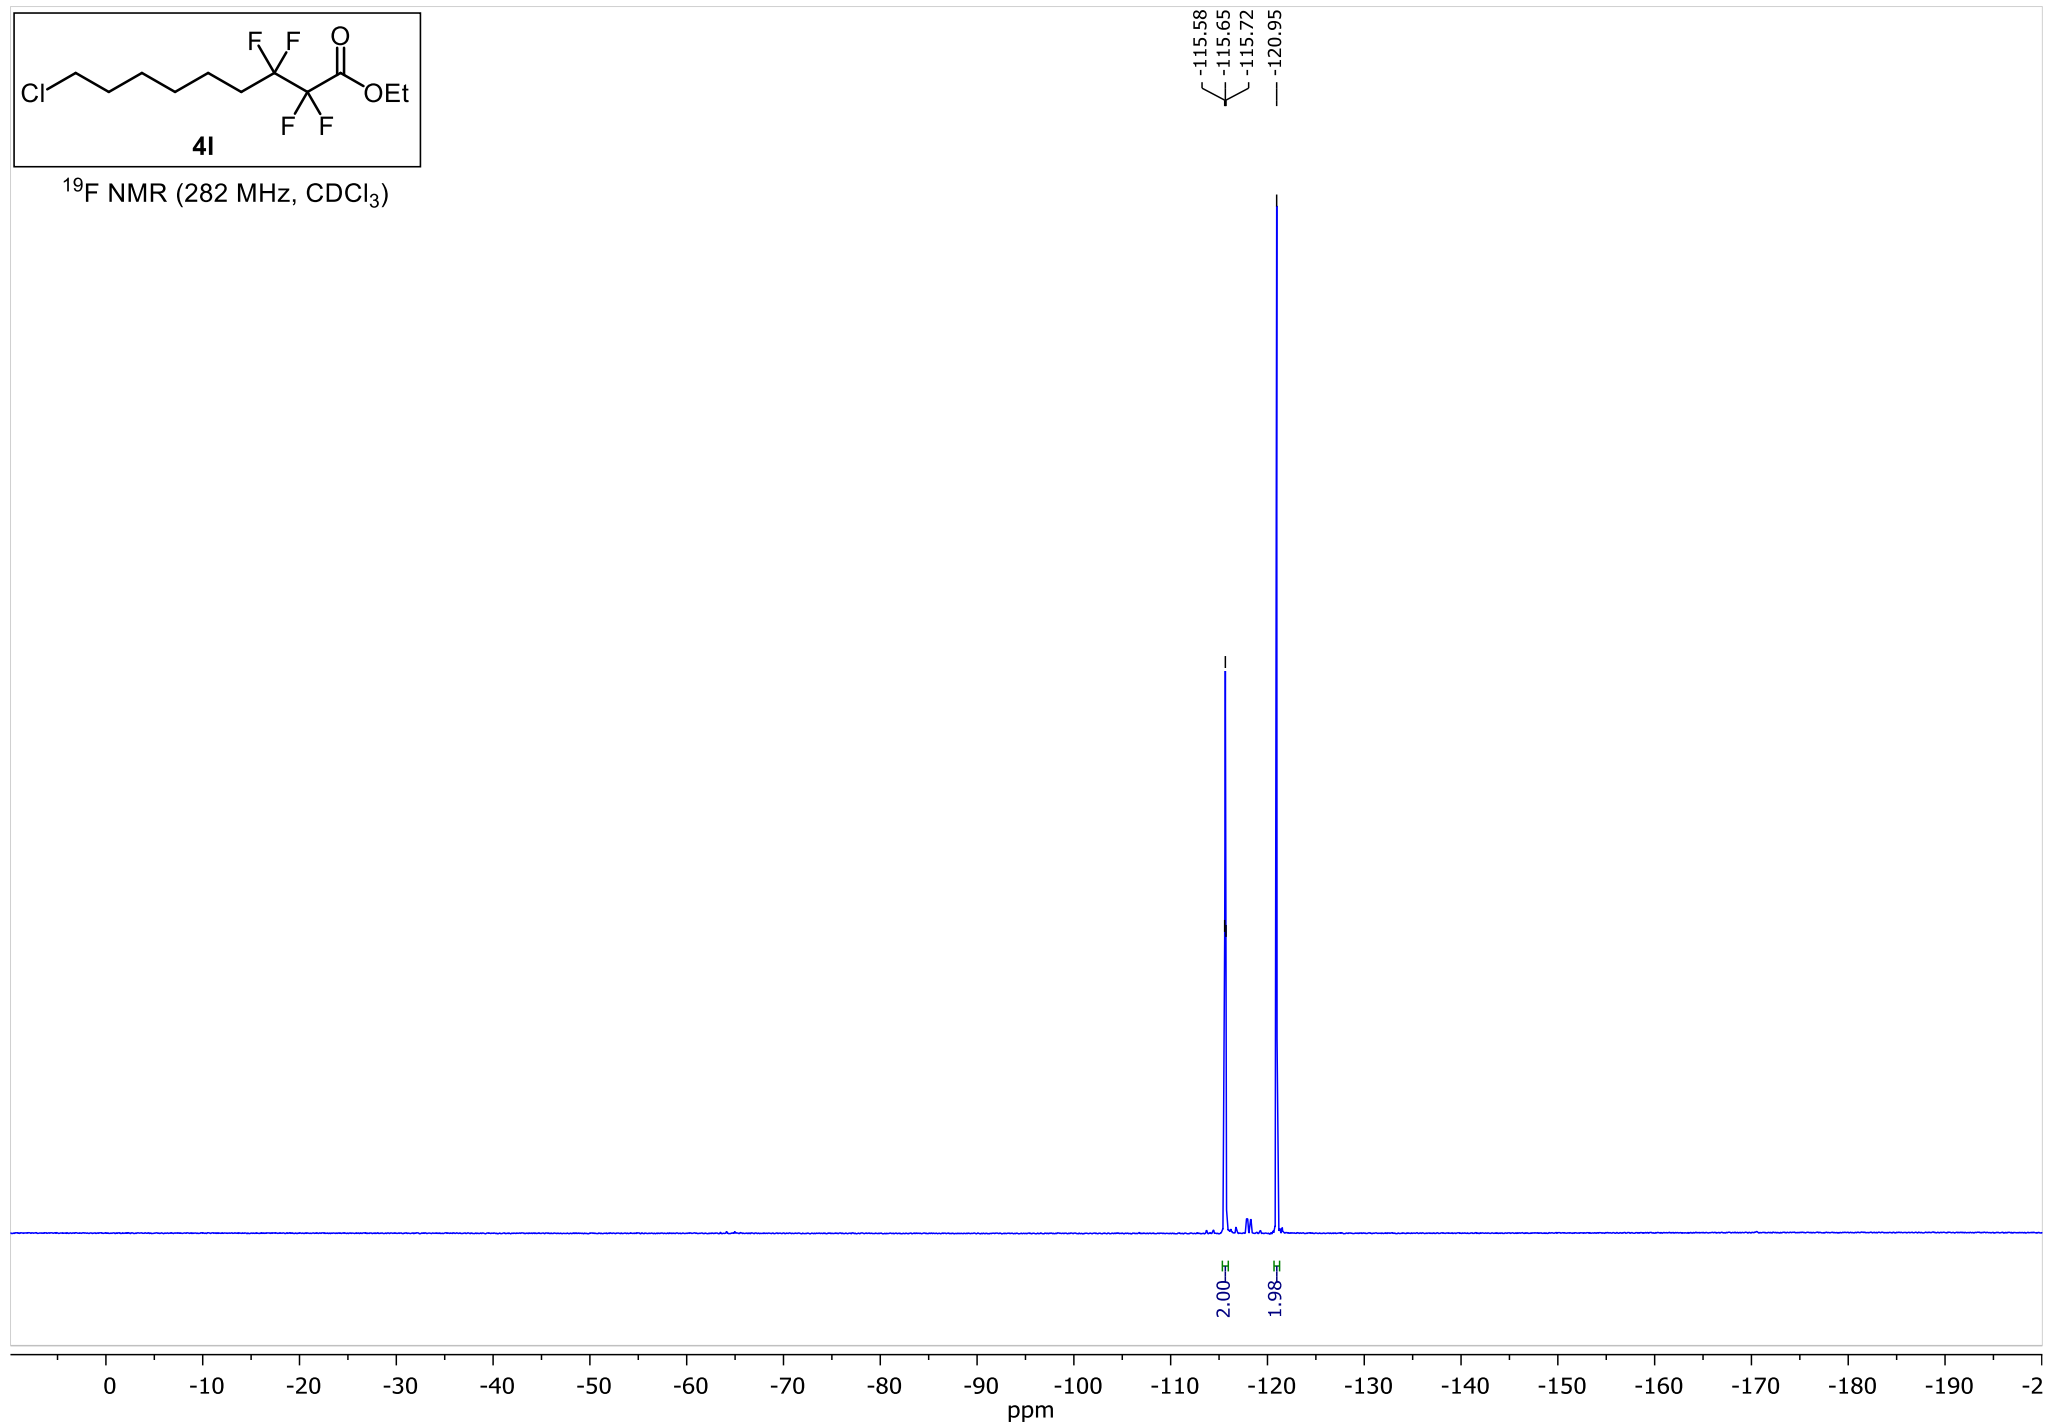

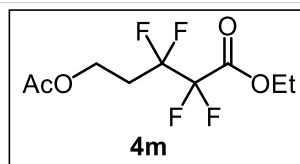

$^1\text{H}$  NMR (300 MHz,  $\text{CDCl}_3$ )

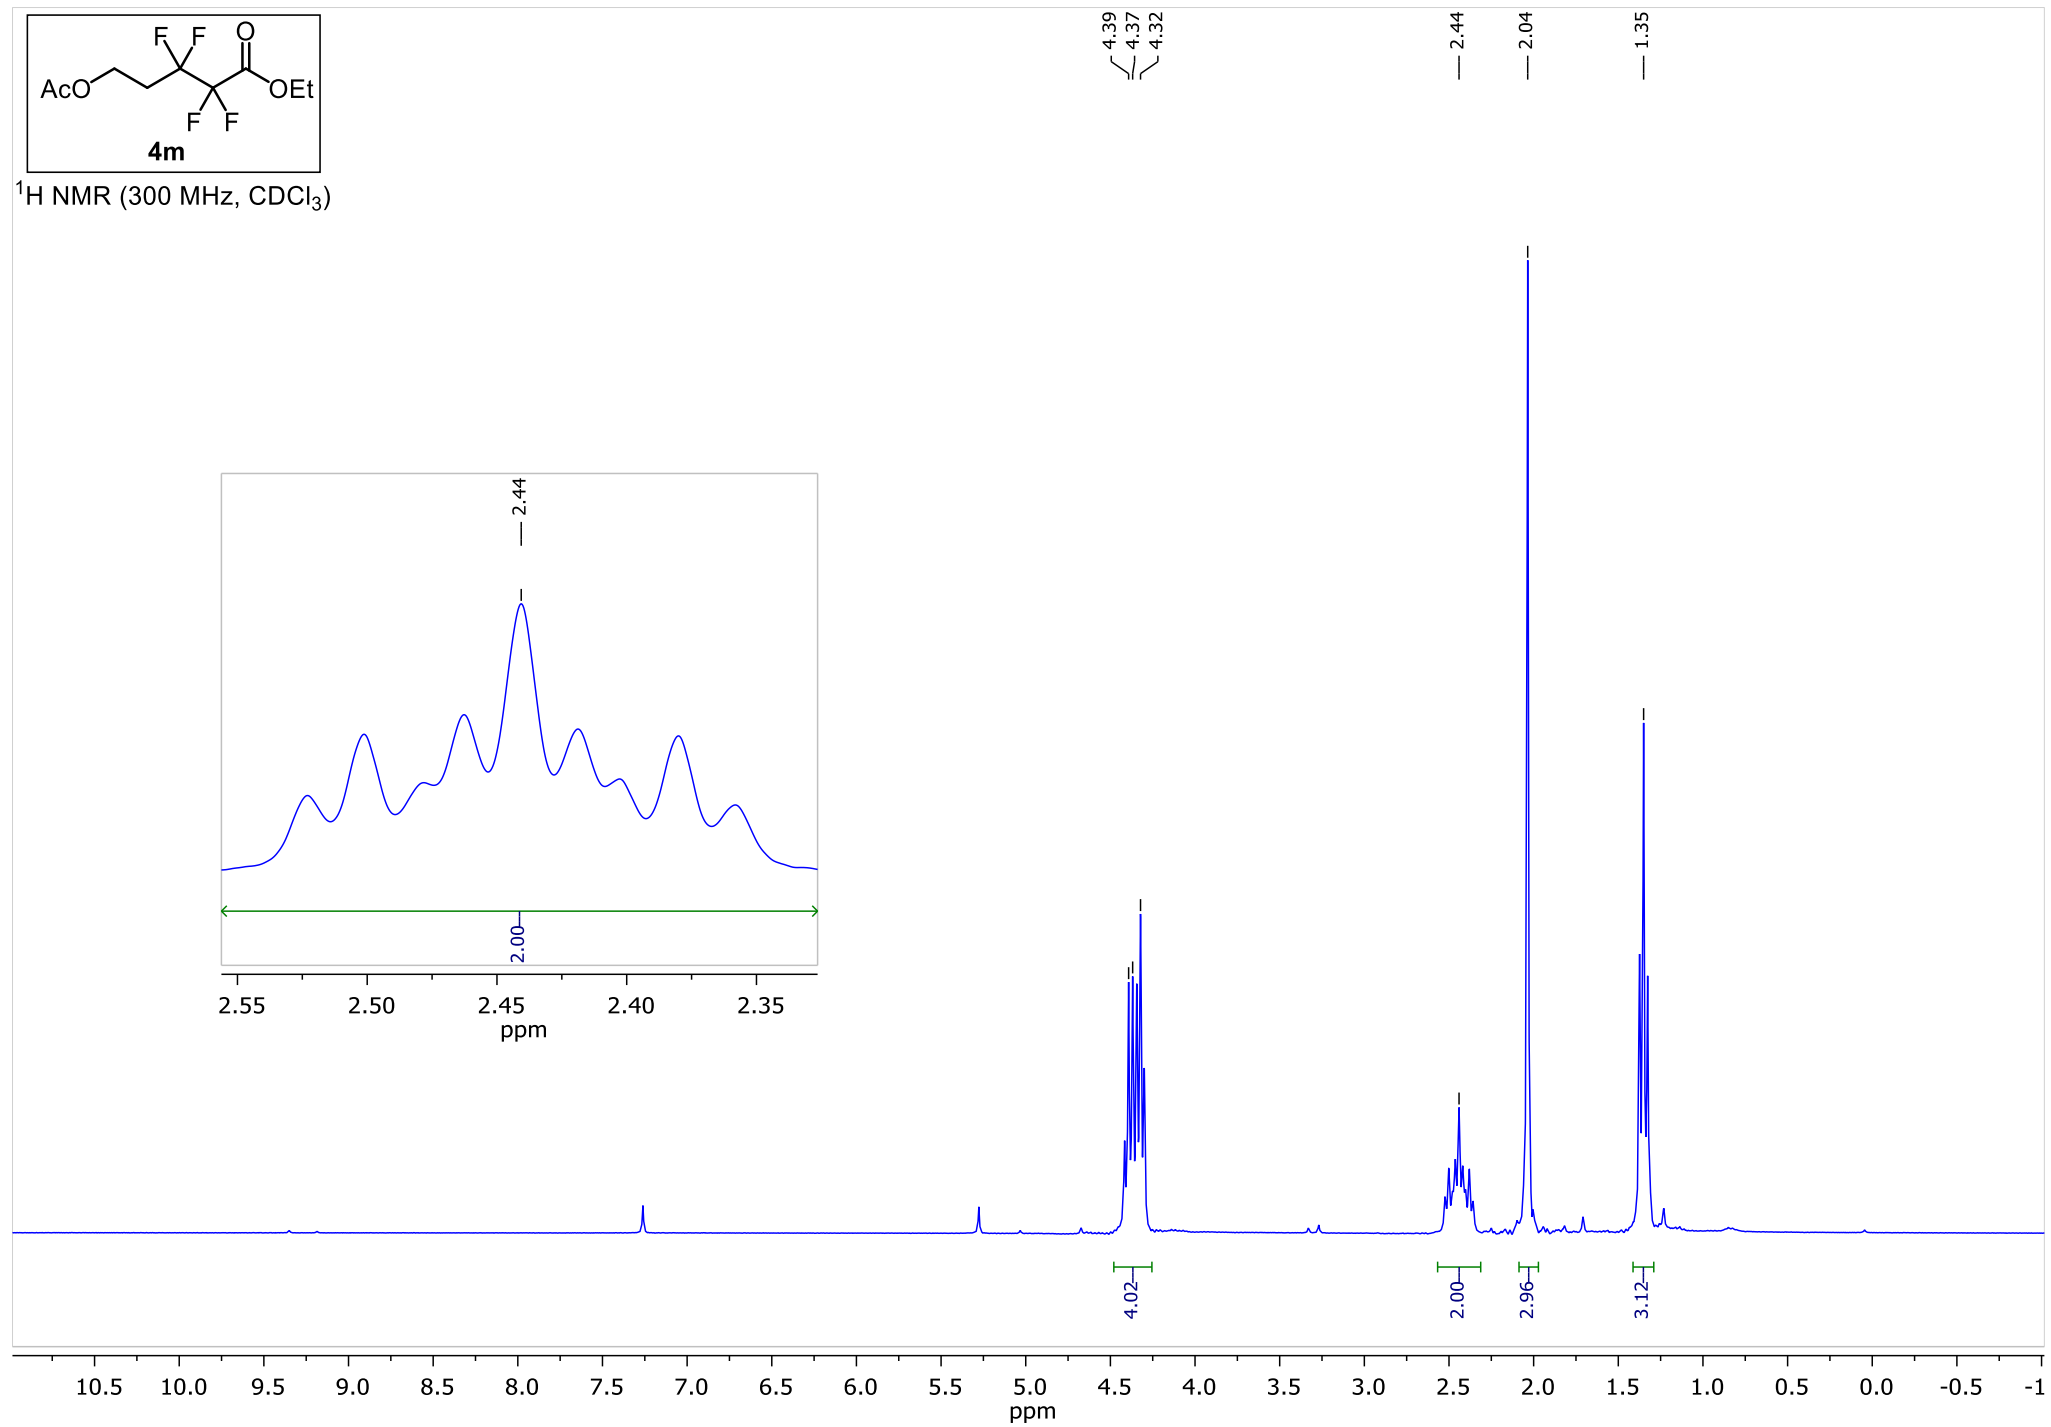



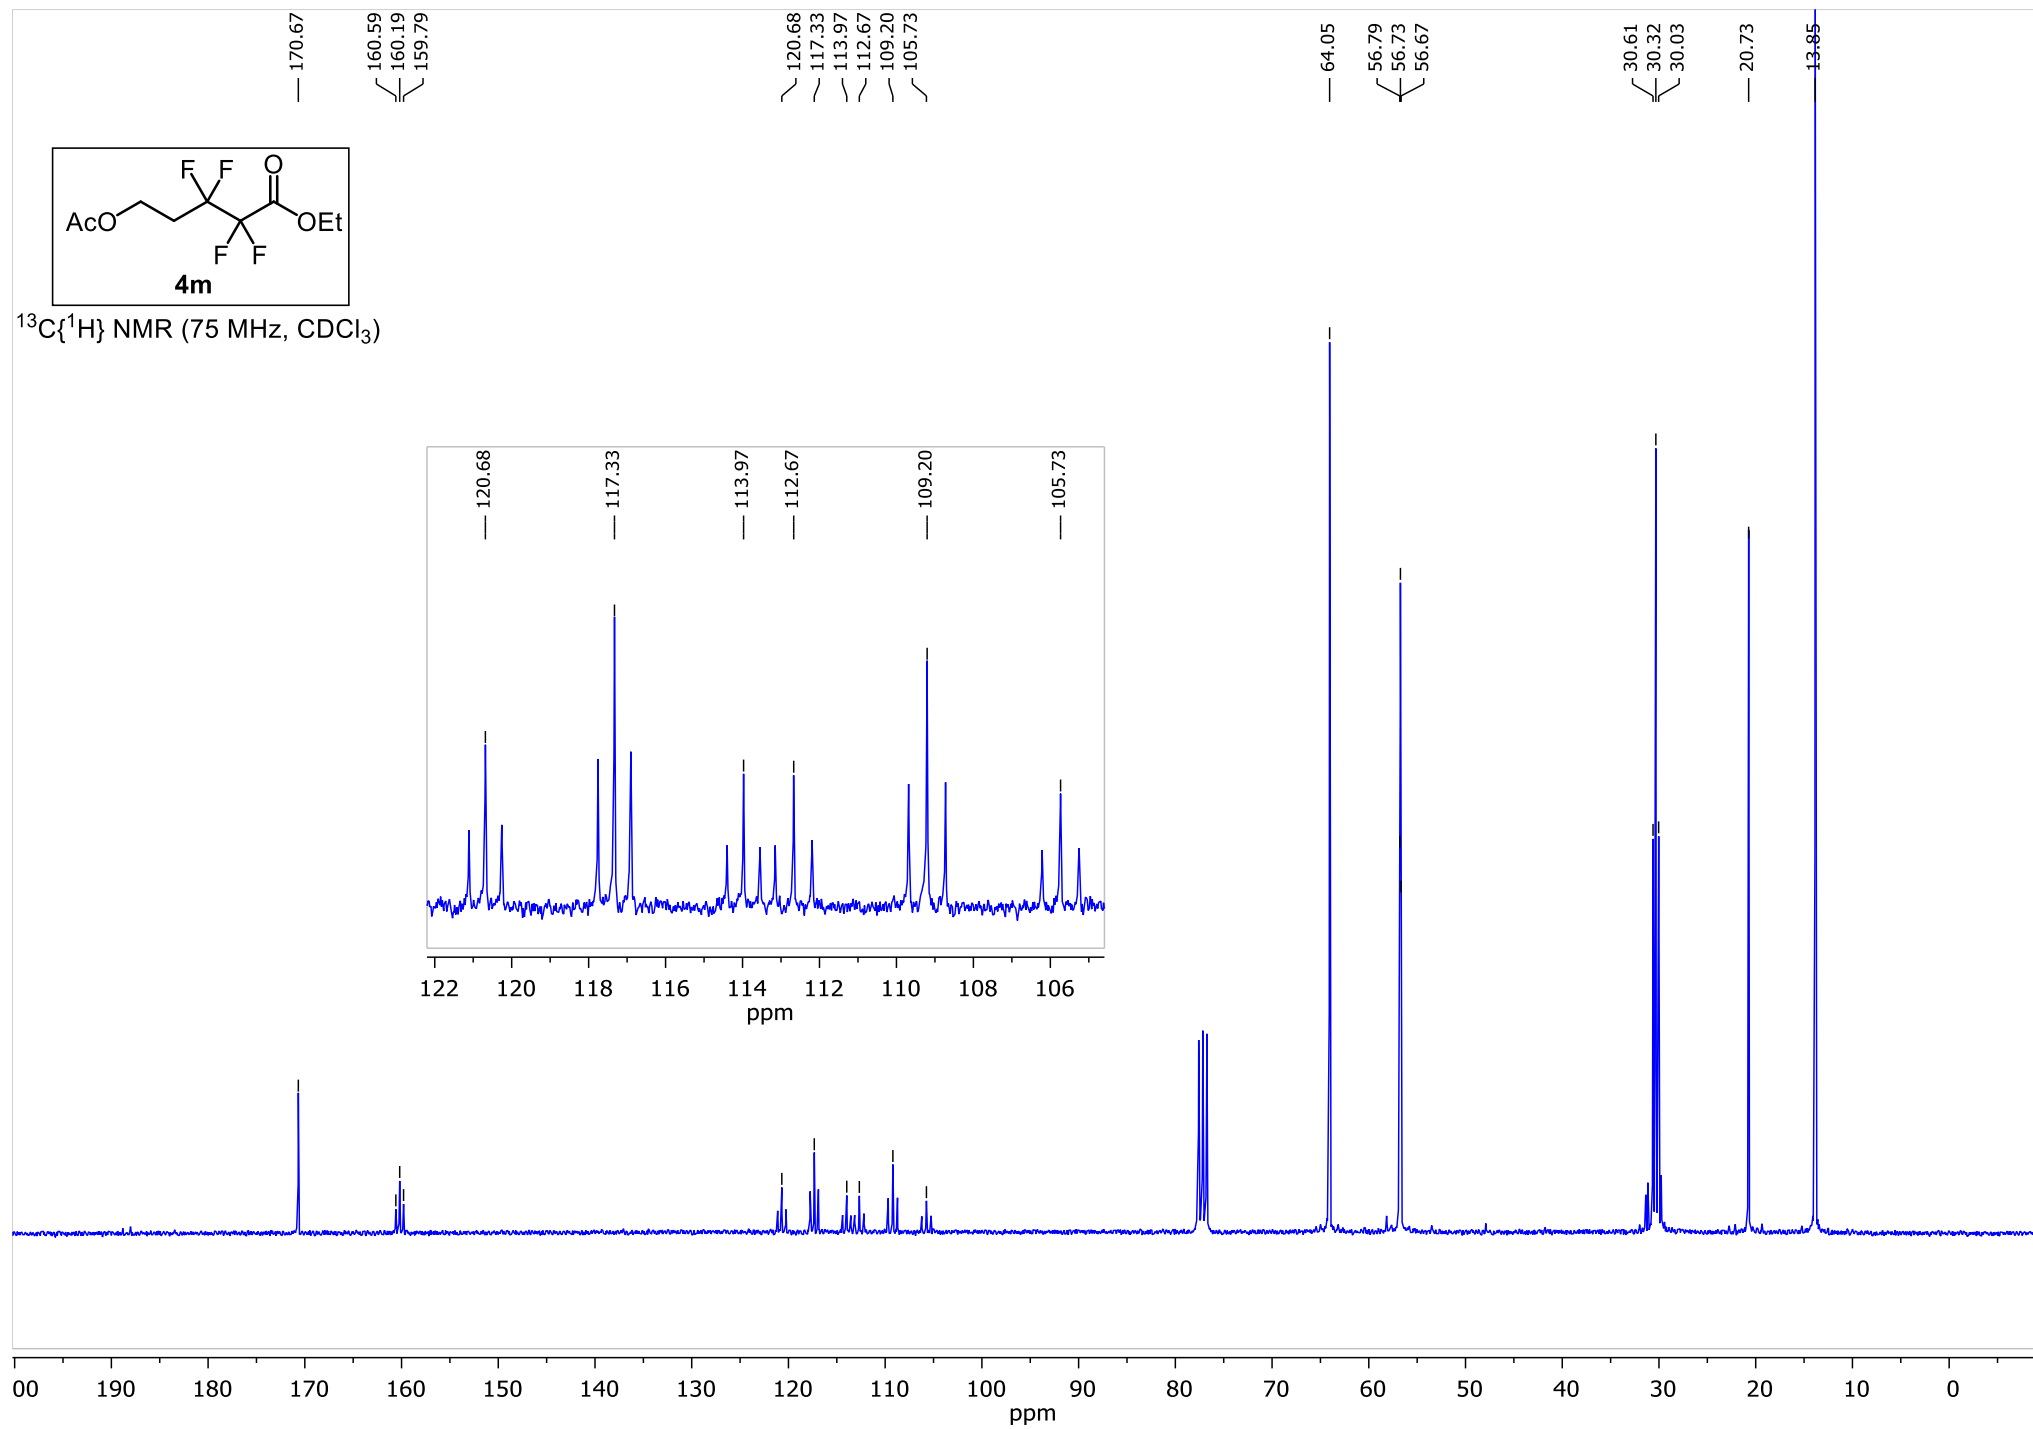

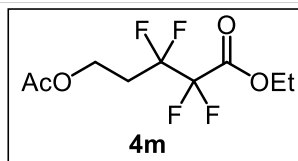

<sup>19</sup>F NMR (282 MHz, CDCl<sub>3</sub>)

-114.94  
-115.00  
-115.07  
-121.07

2.00

1.99

0 -10 -20 -30 -40 -50 -60 -70 -80 -90 -100 -110 -120 -130 -140 -150 -160 -170 -180 -190 -200  
ppm

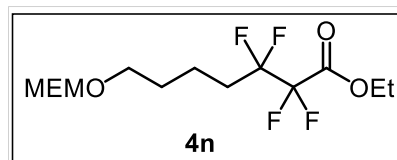

$^1\text{H}$  NMR (300 MHz,  $\text{CDCl}_3$ )

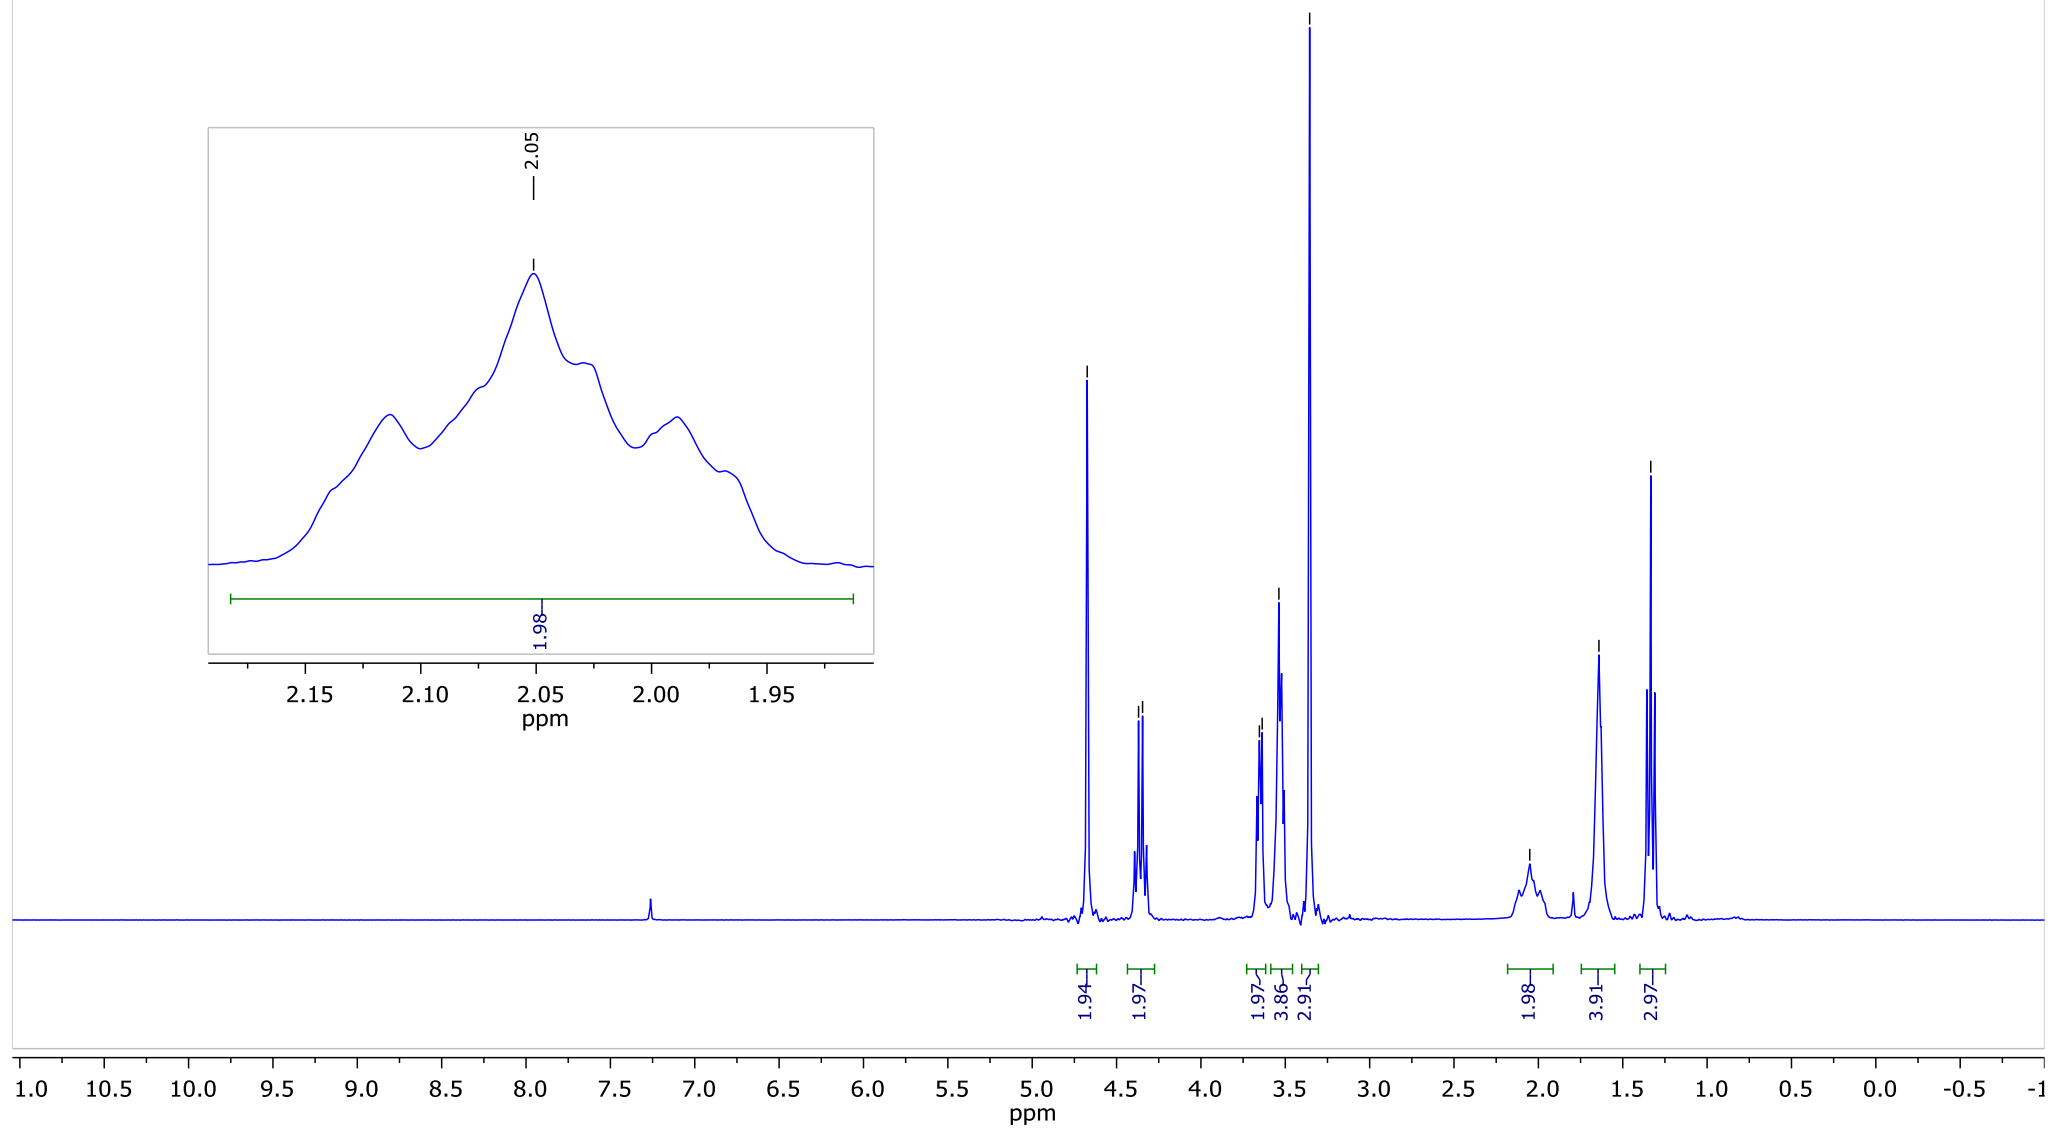

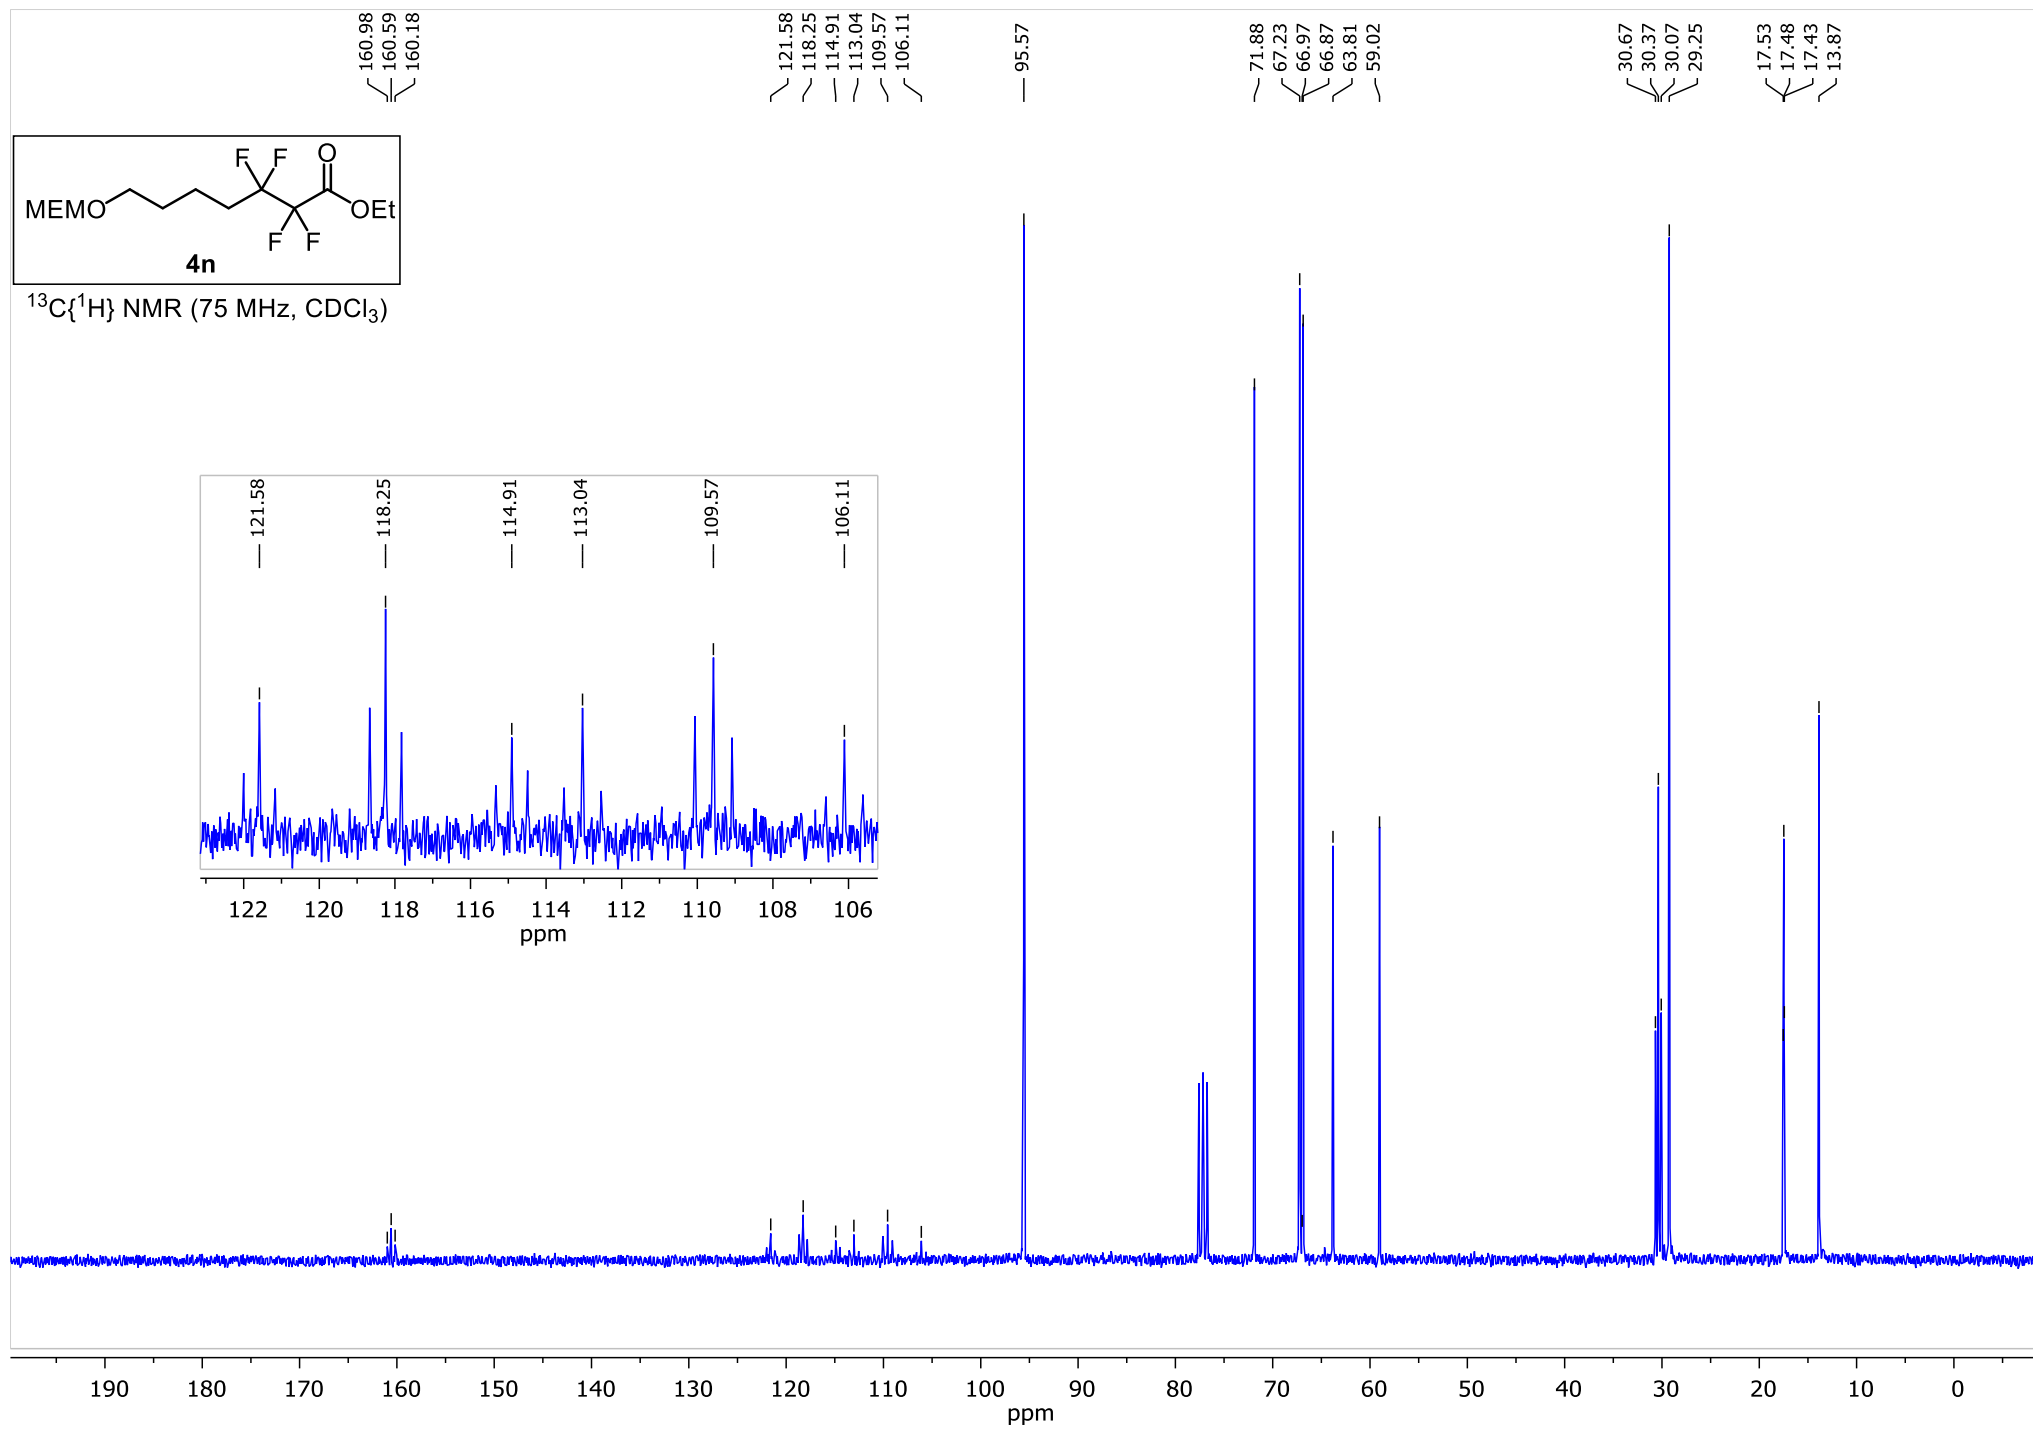

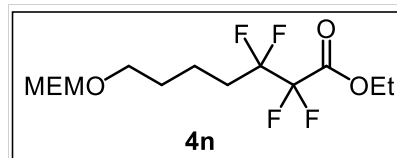

<sup>19</sup>F NMR (282 MHz, CDCl<sub>3</sub>)

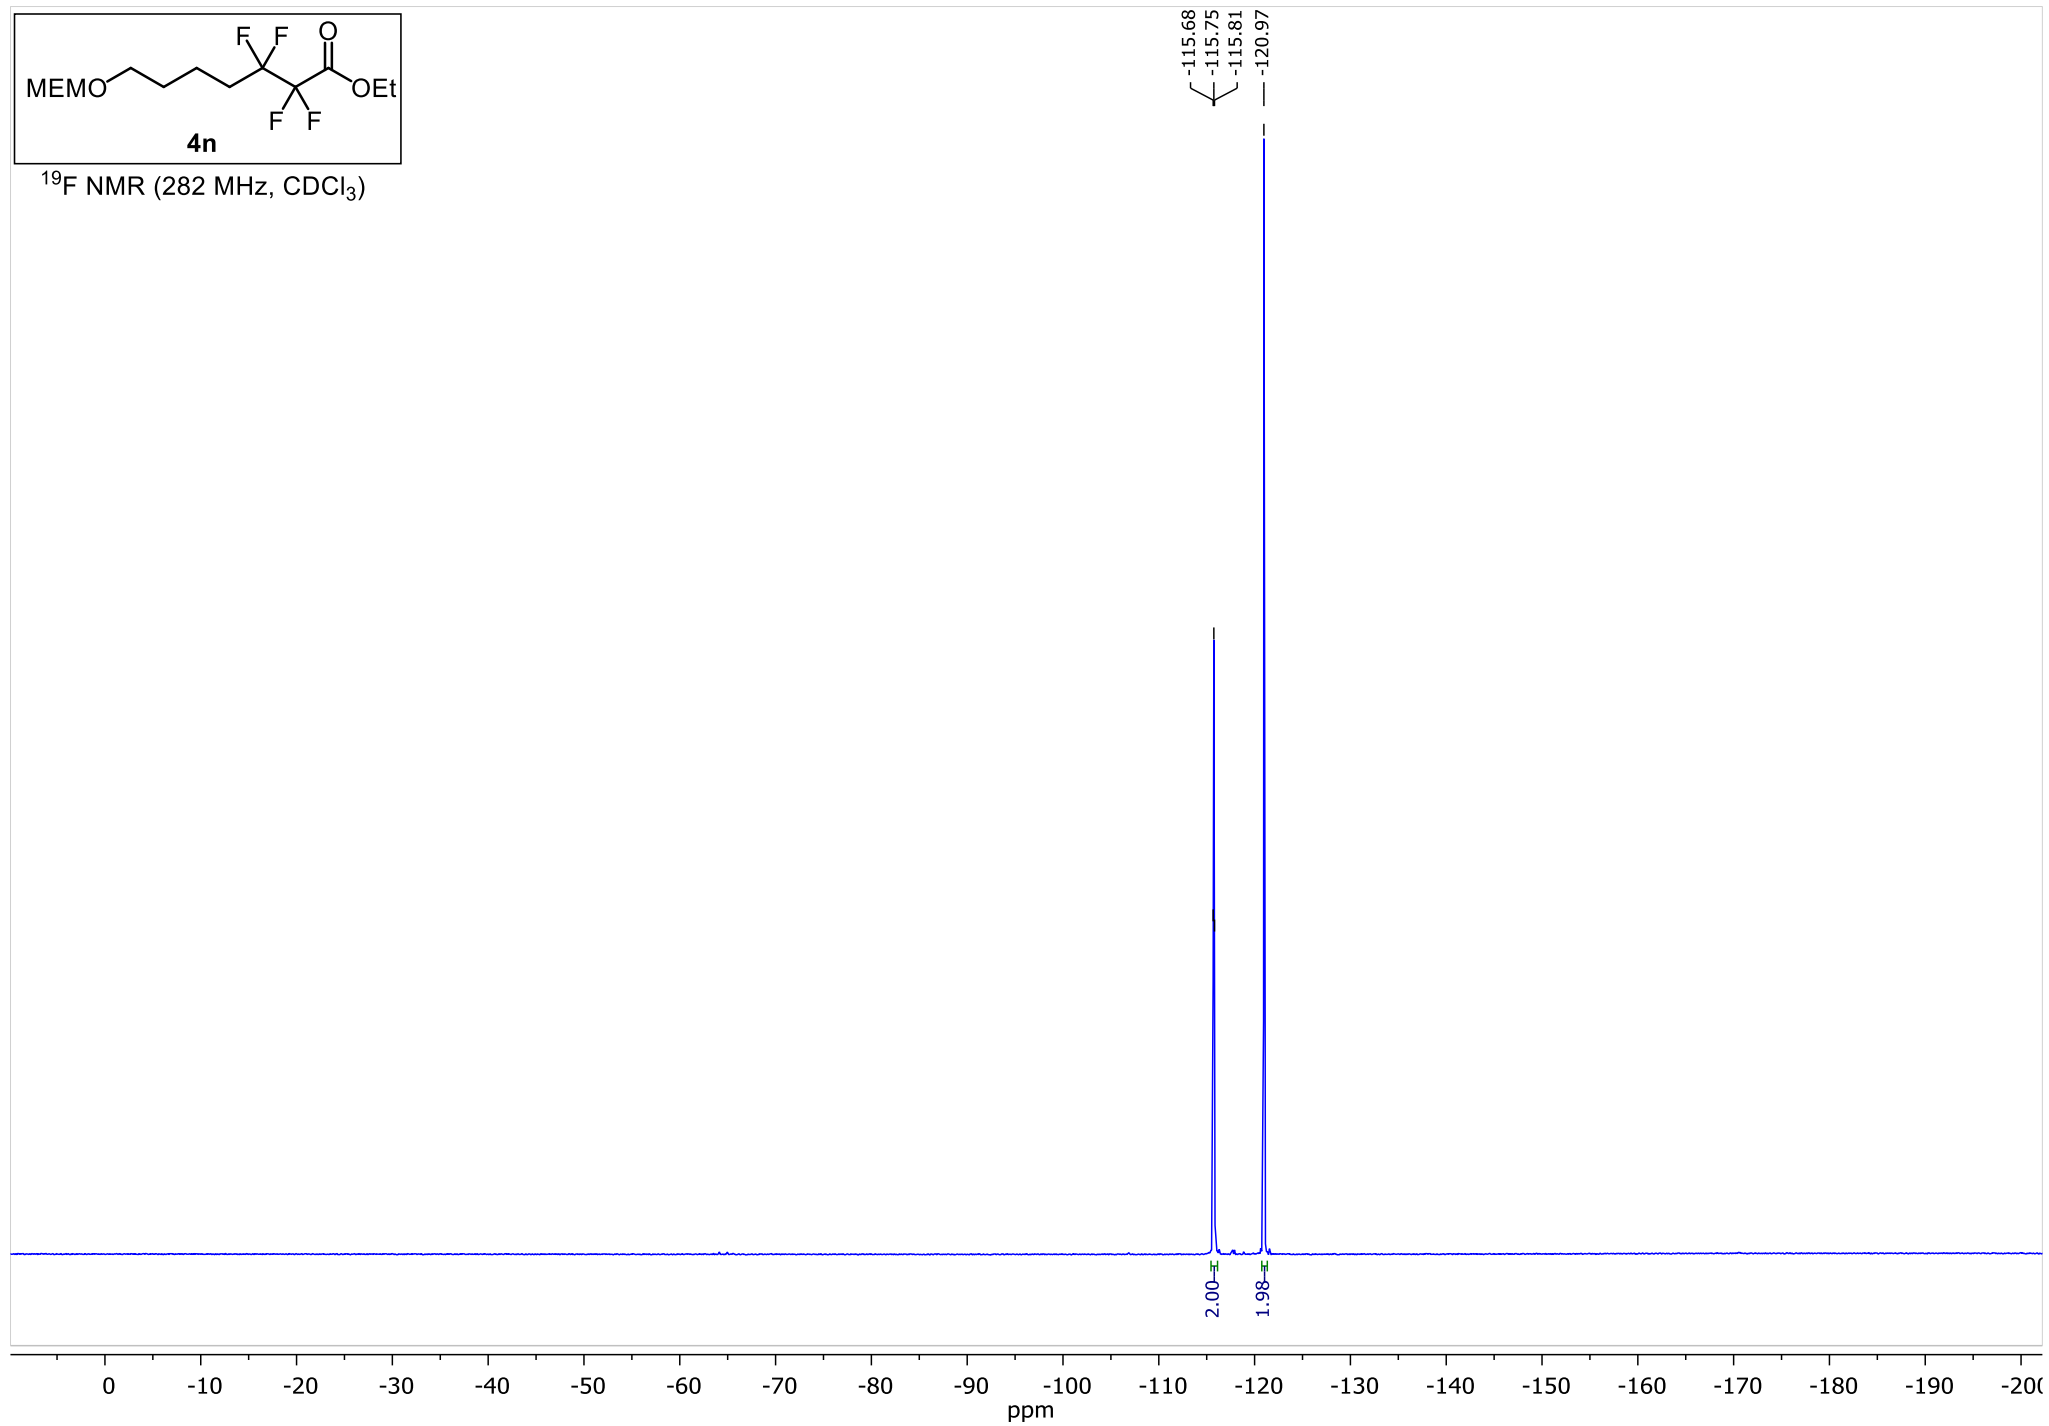

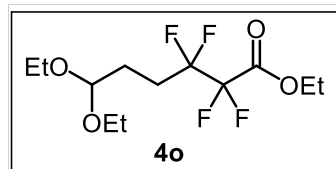

$^1\text{H}$  NMR (300 MHz,  $\text{CDCl}_3$ )

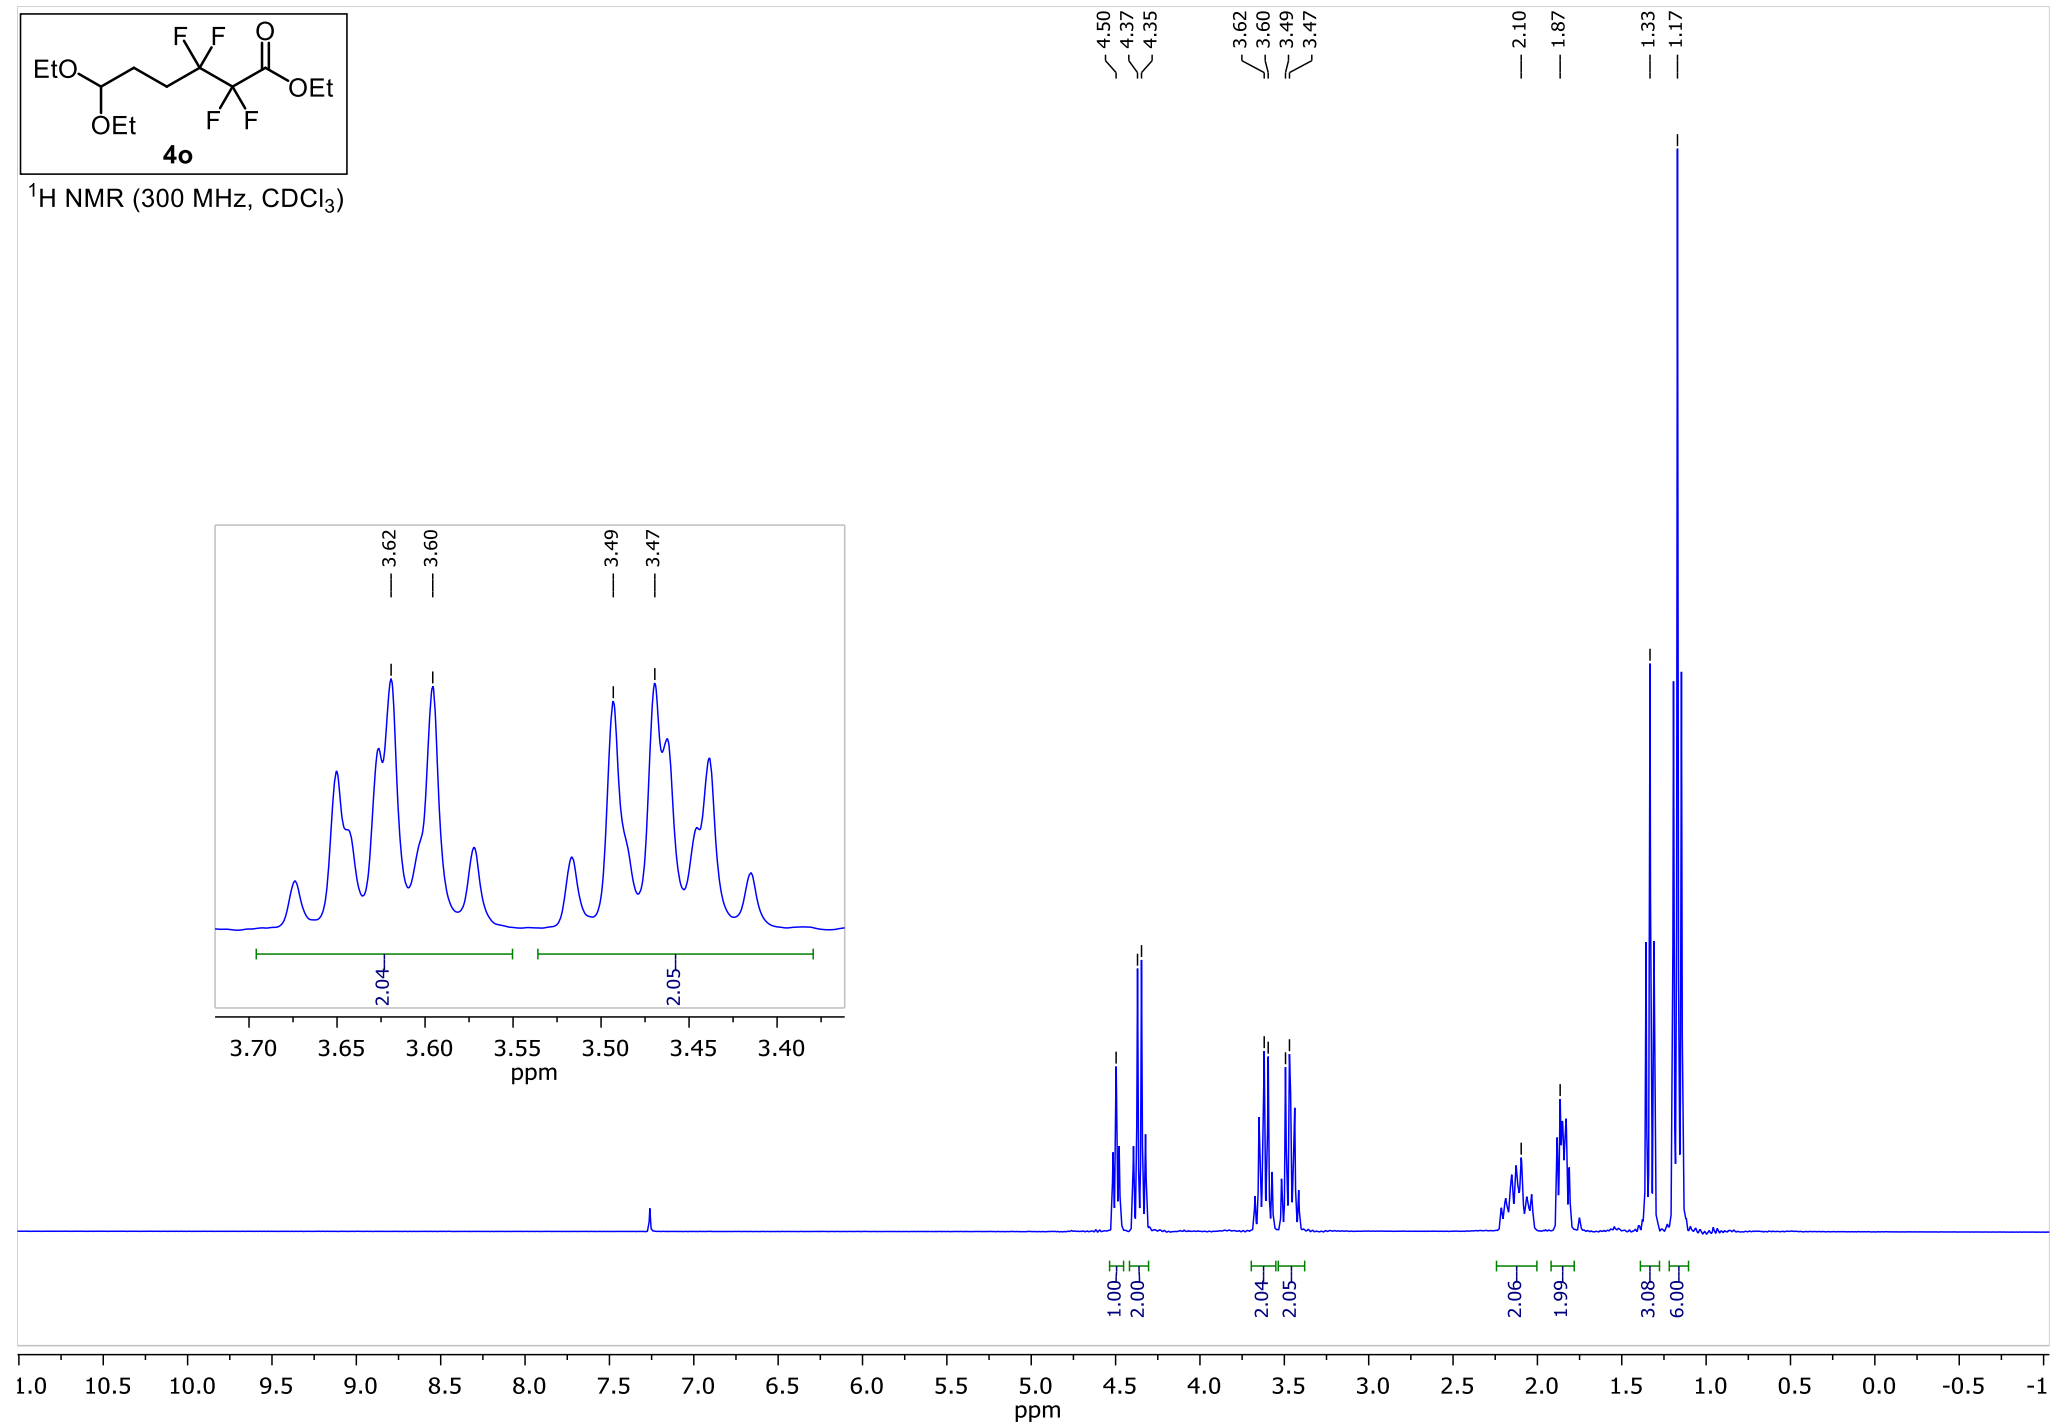

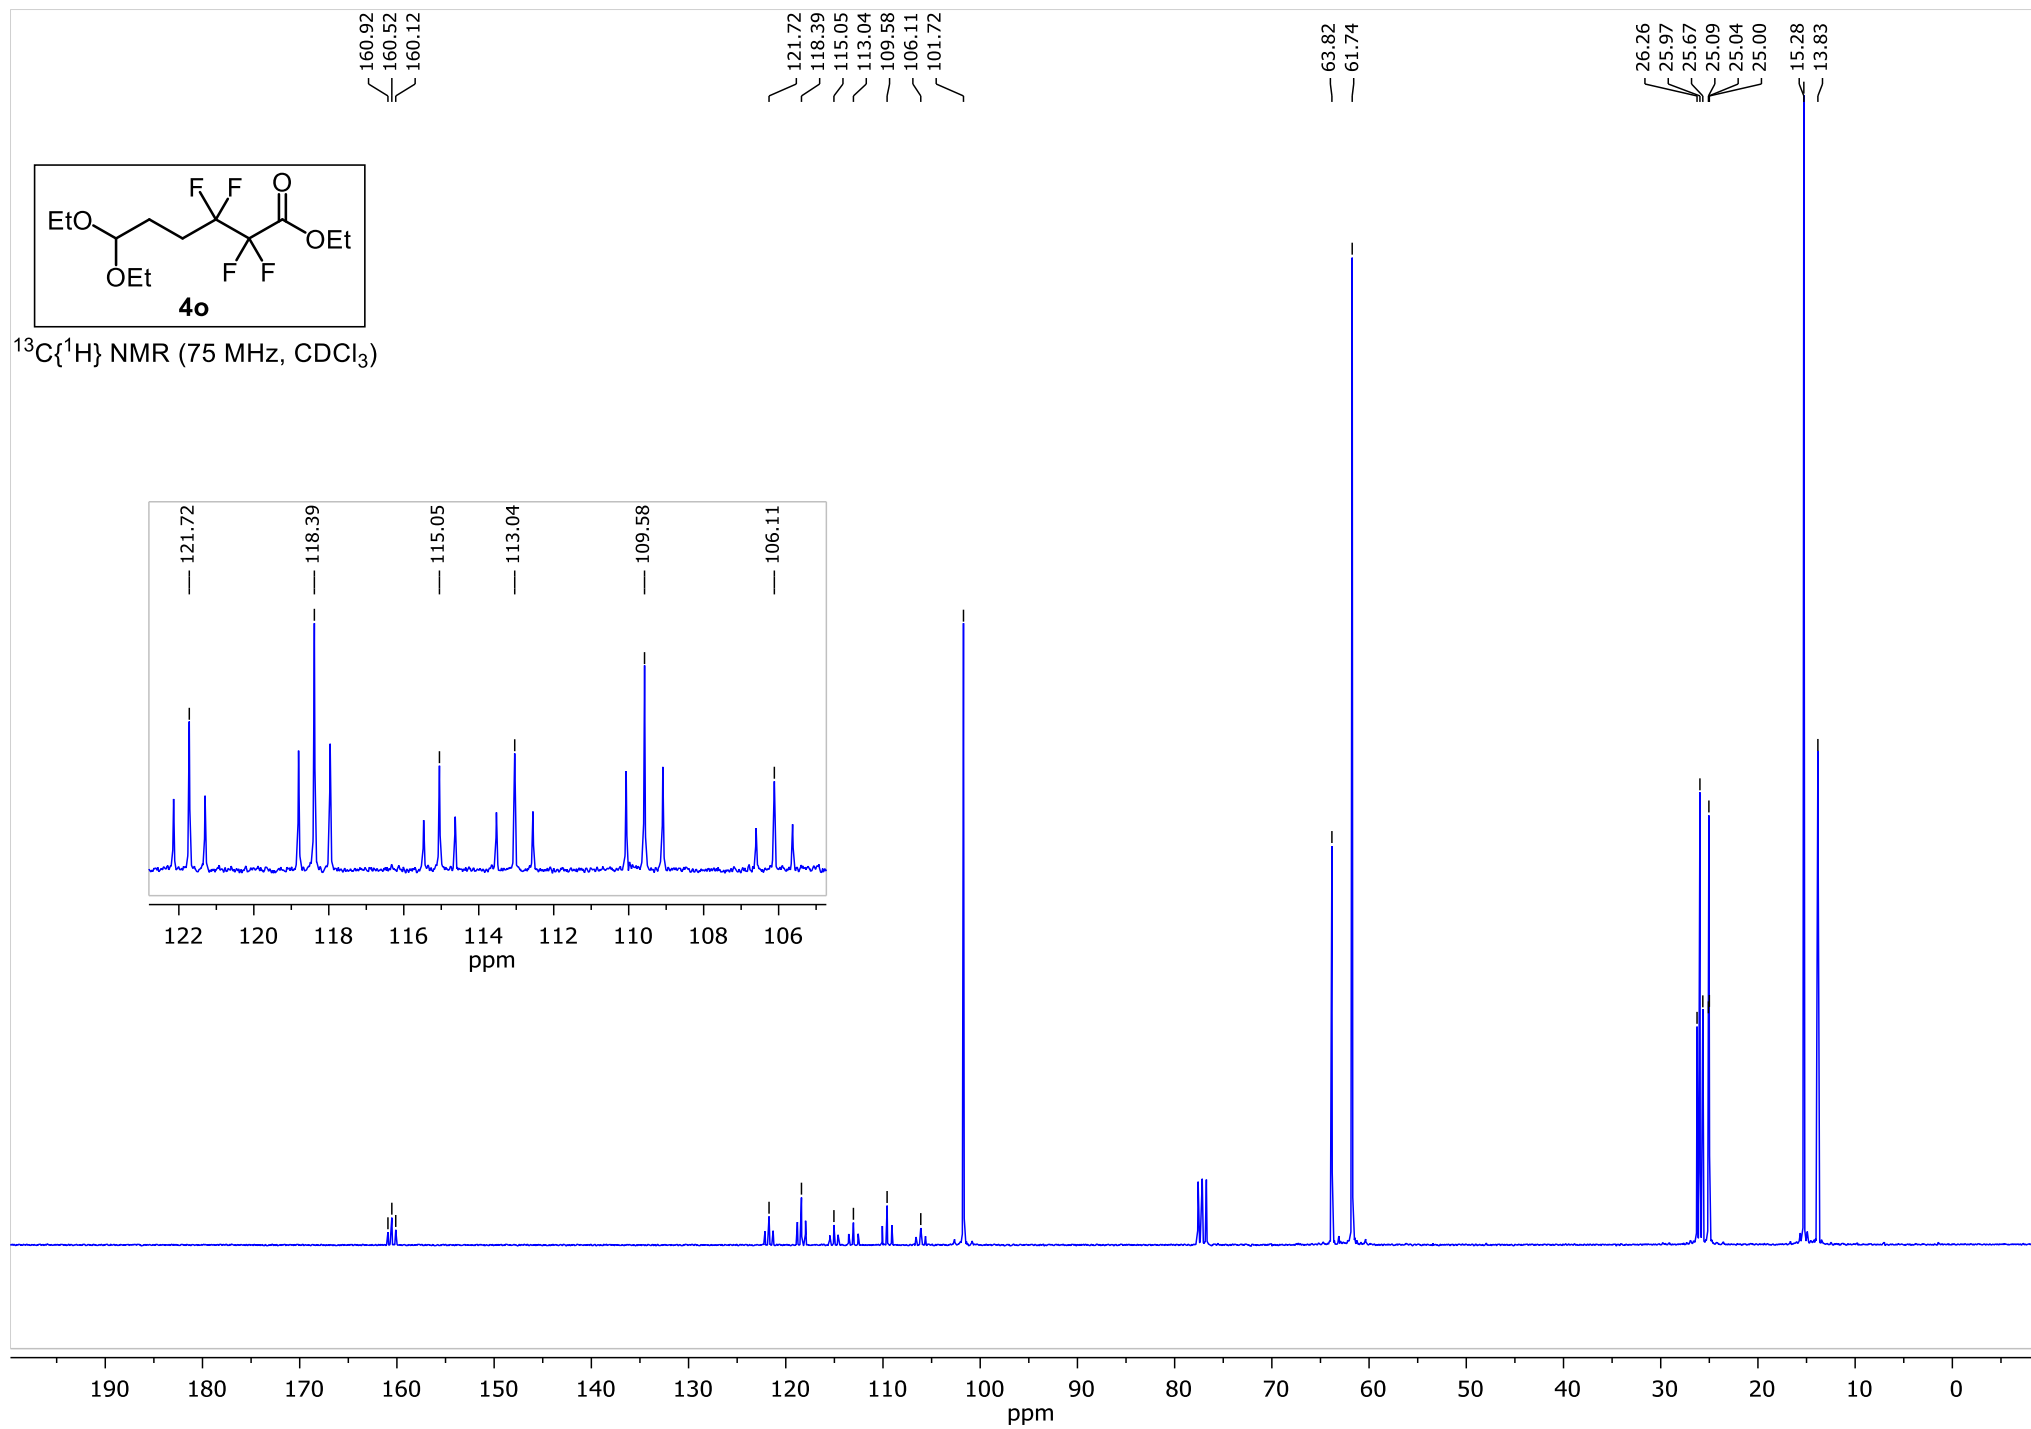

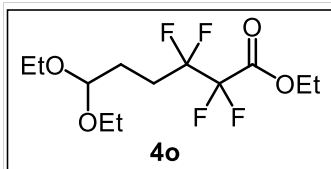

<sup>19</sup>F NMR (282 MHz, CDCl<sub>3</sub>)

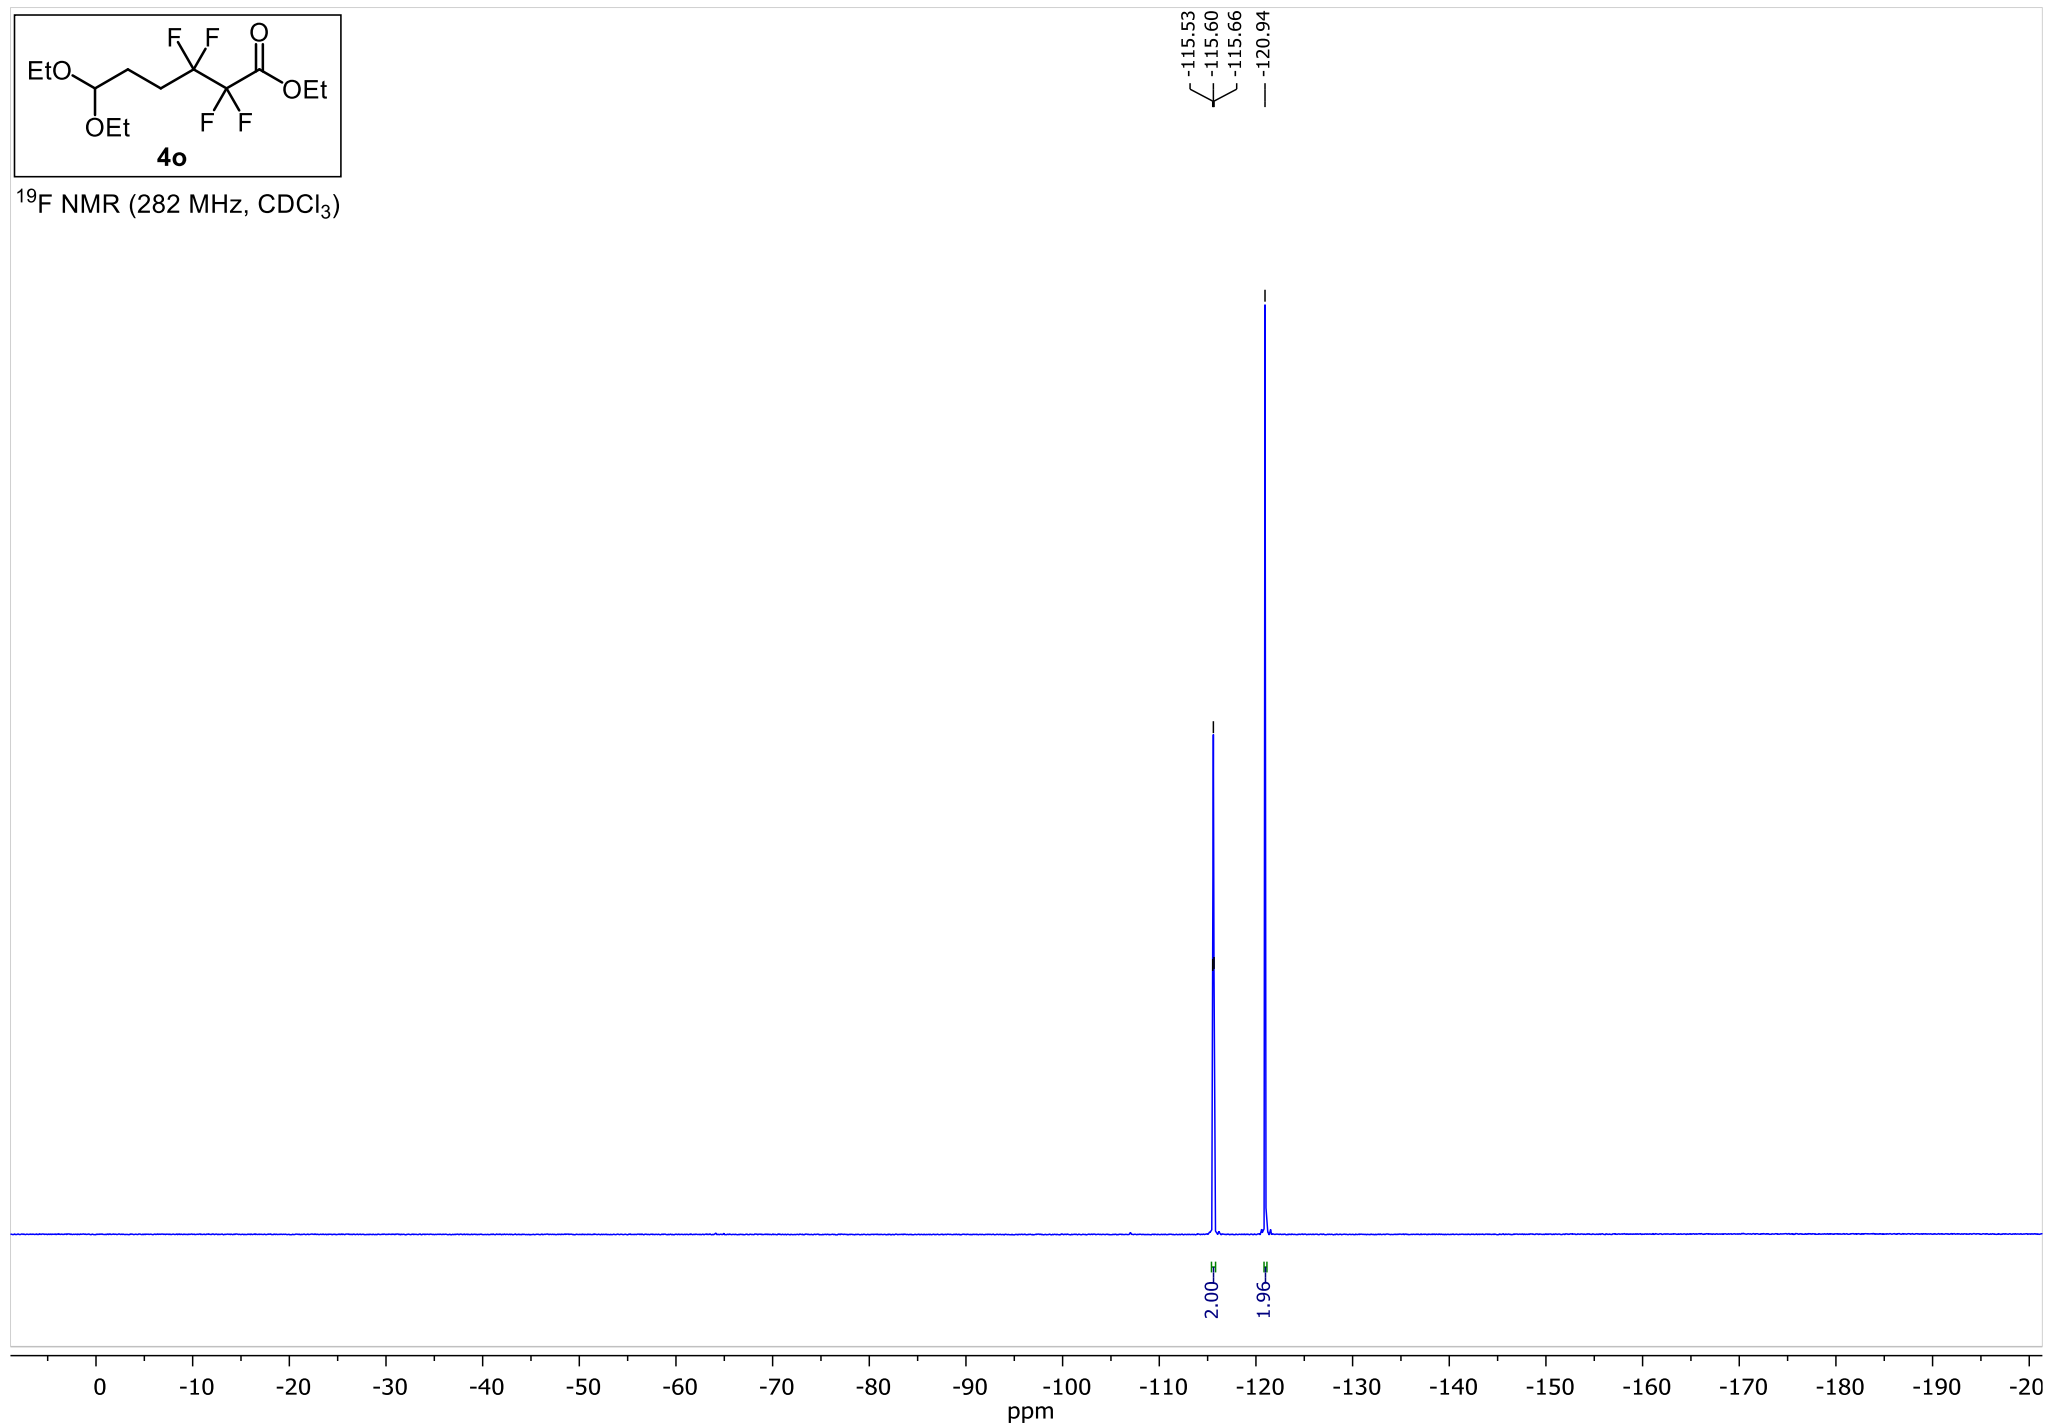



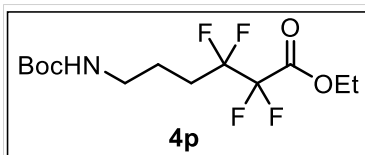

<sup>1</sup>H NMR (300 MHz, CDCl<sub>3</sub>)

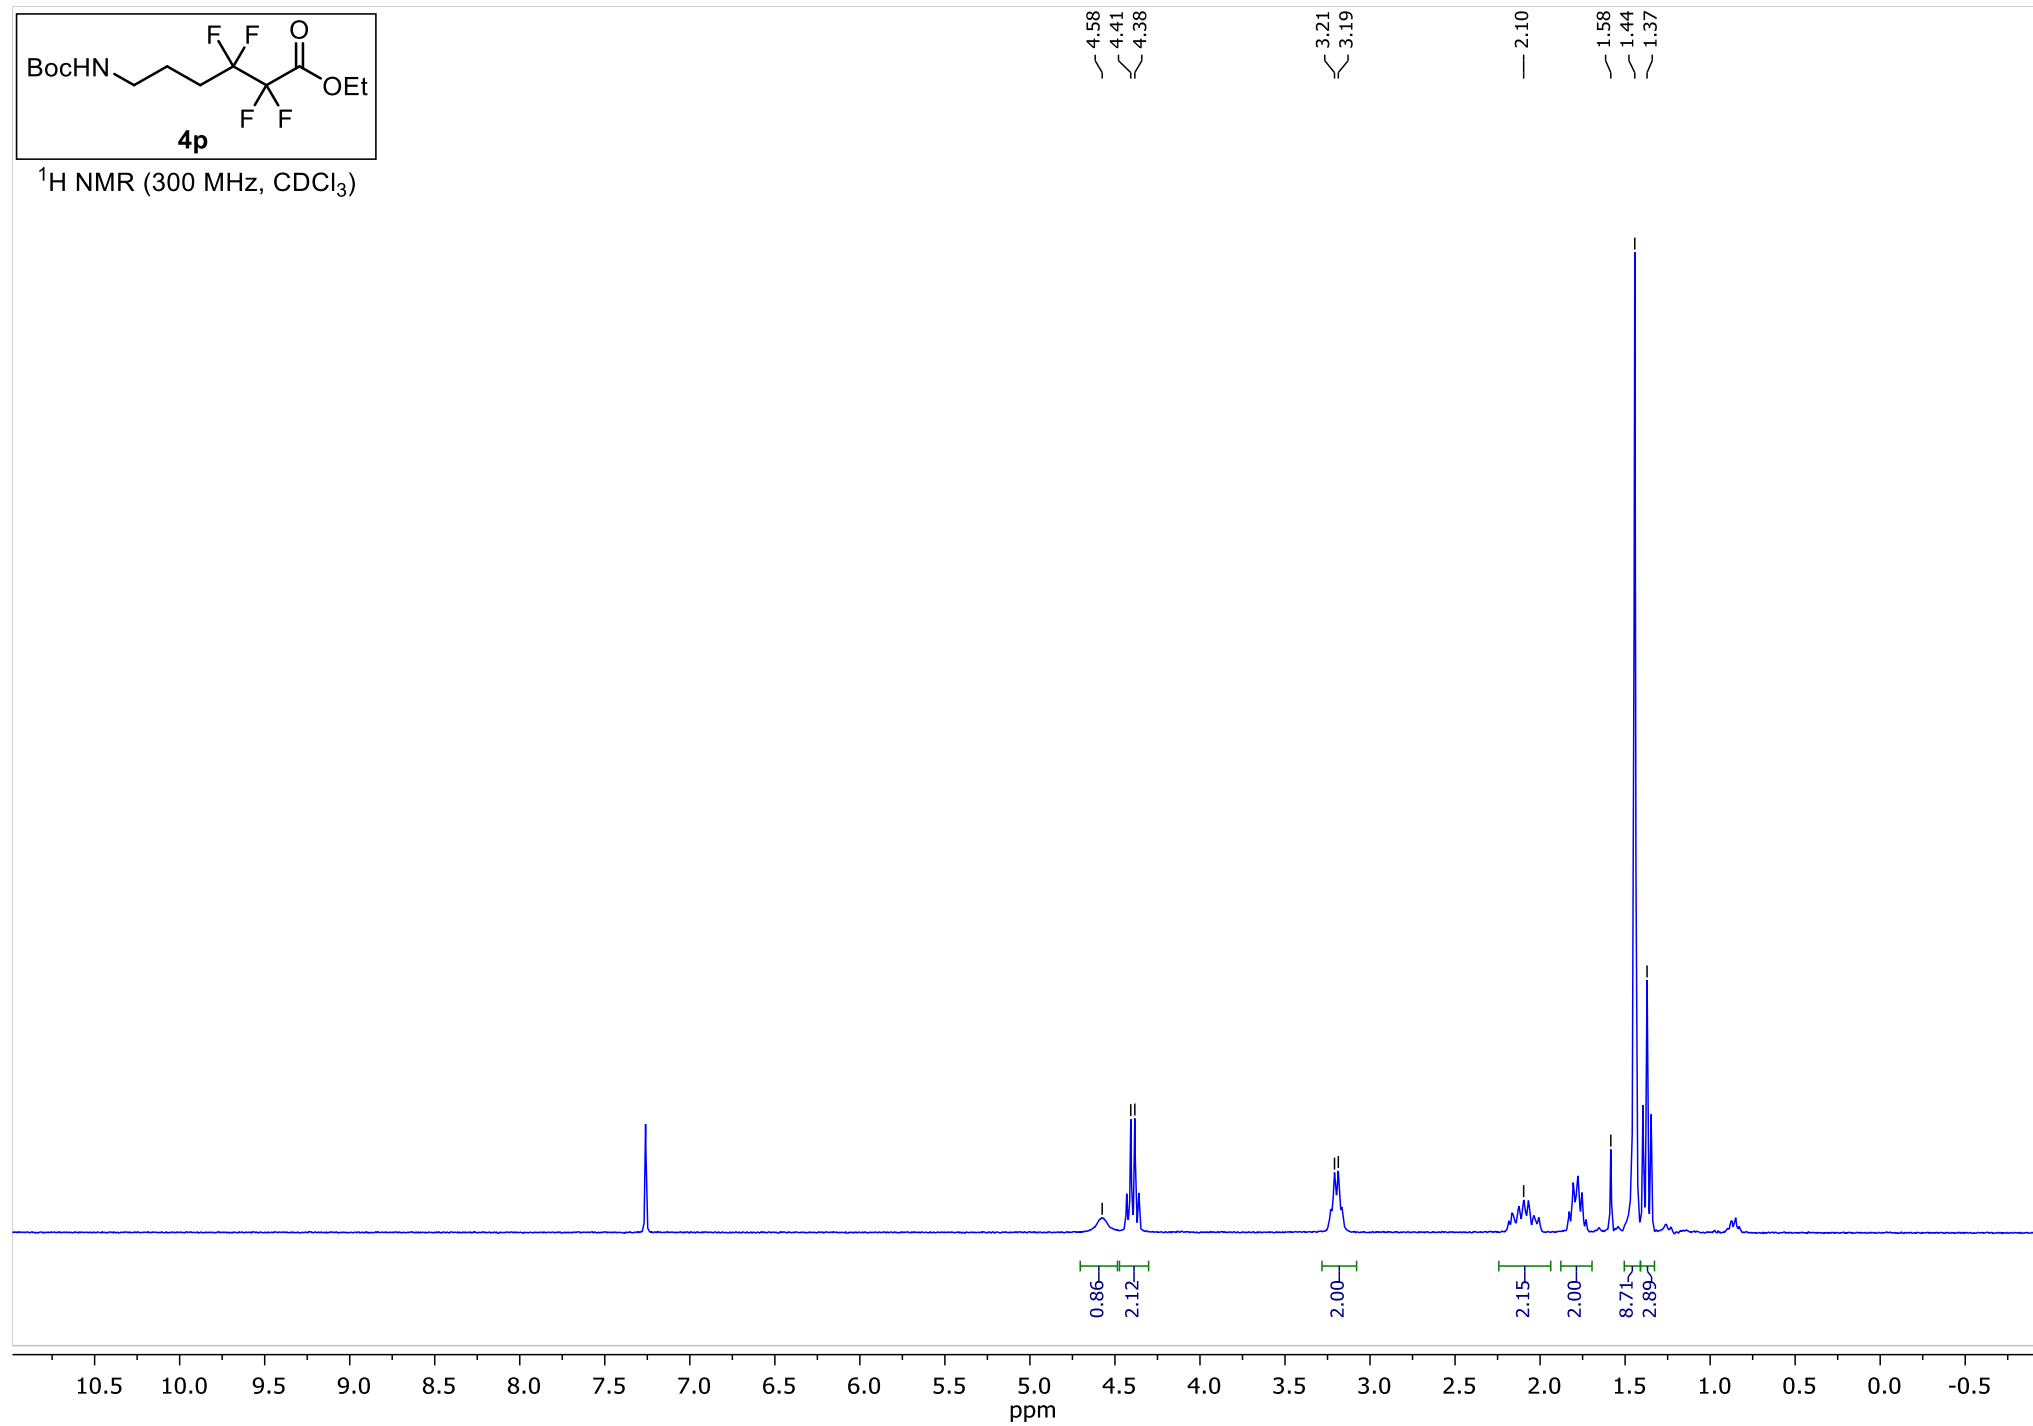

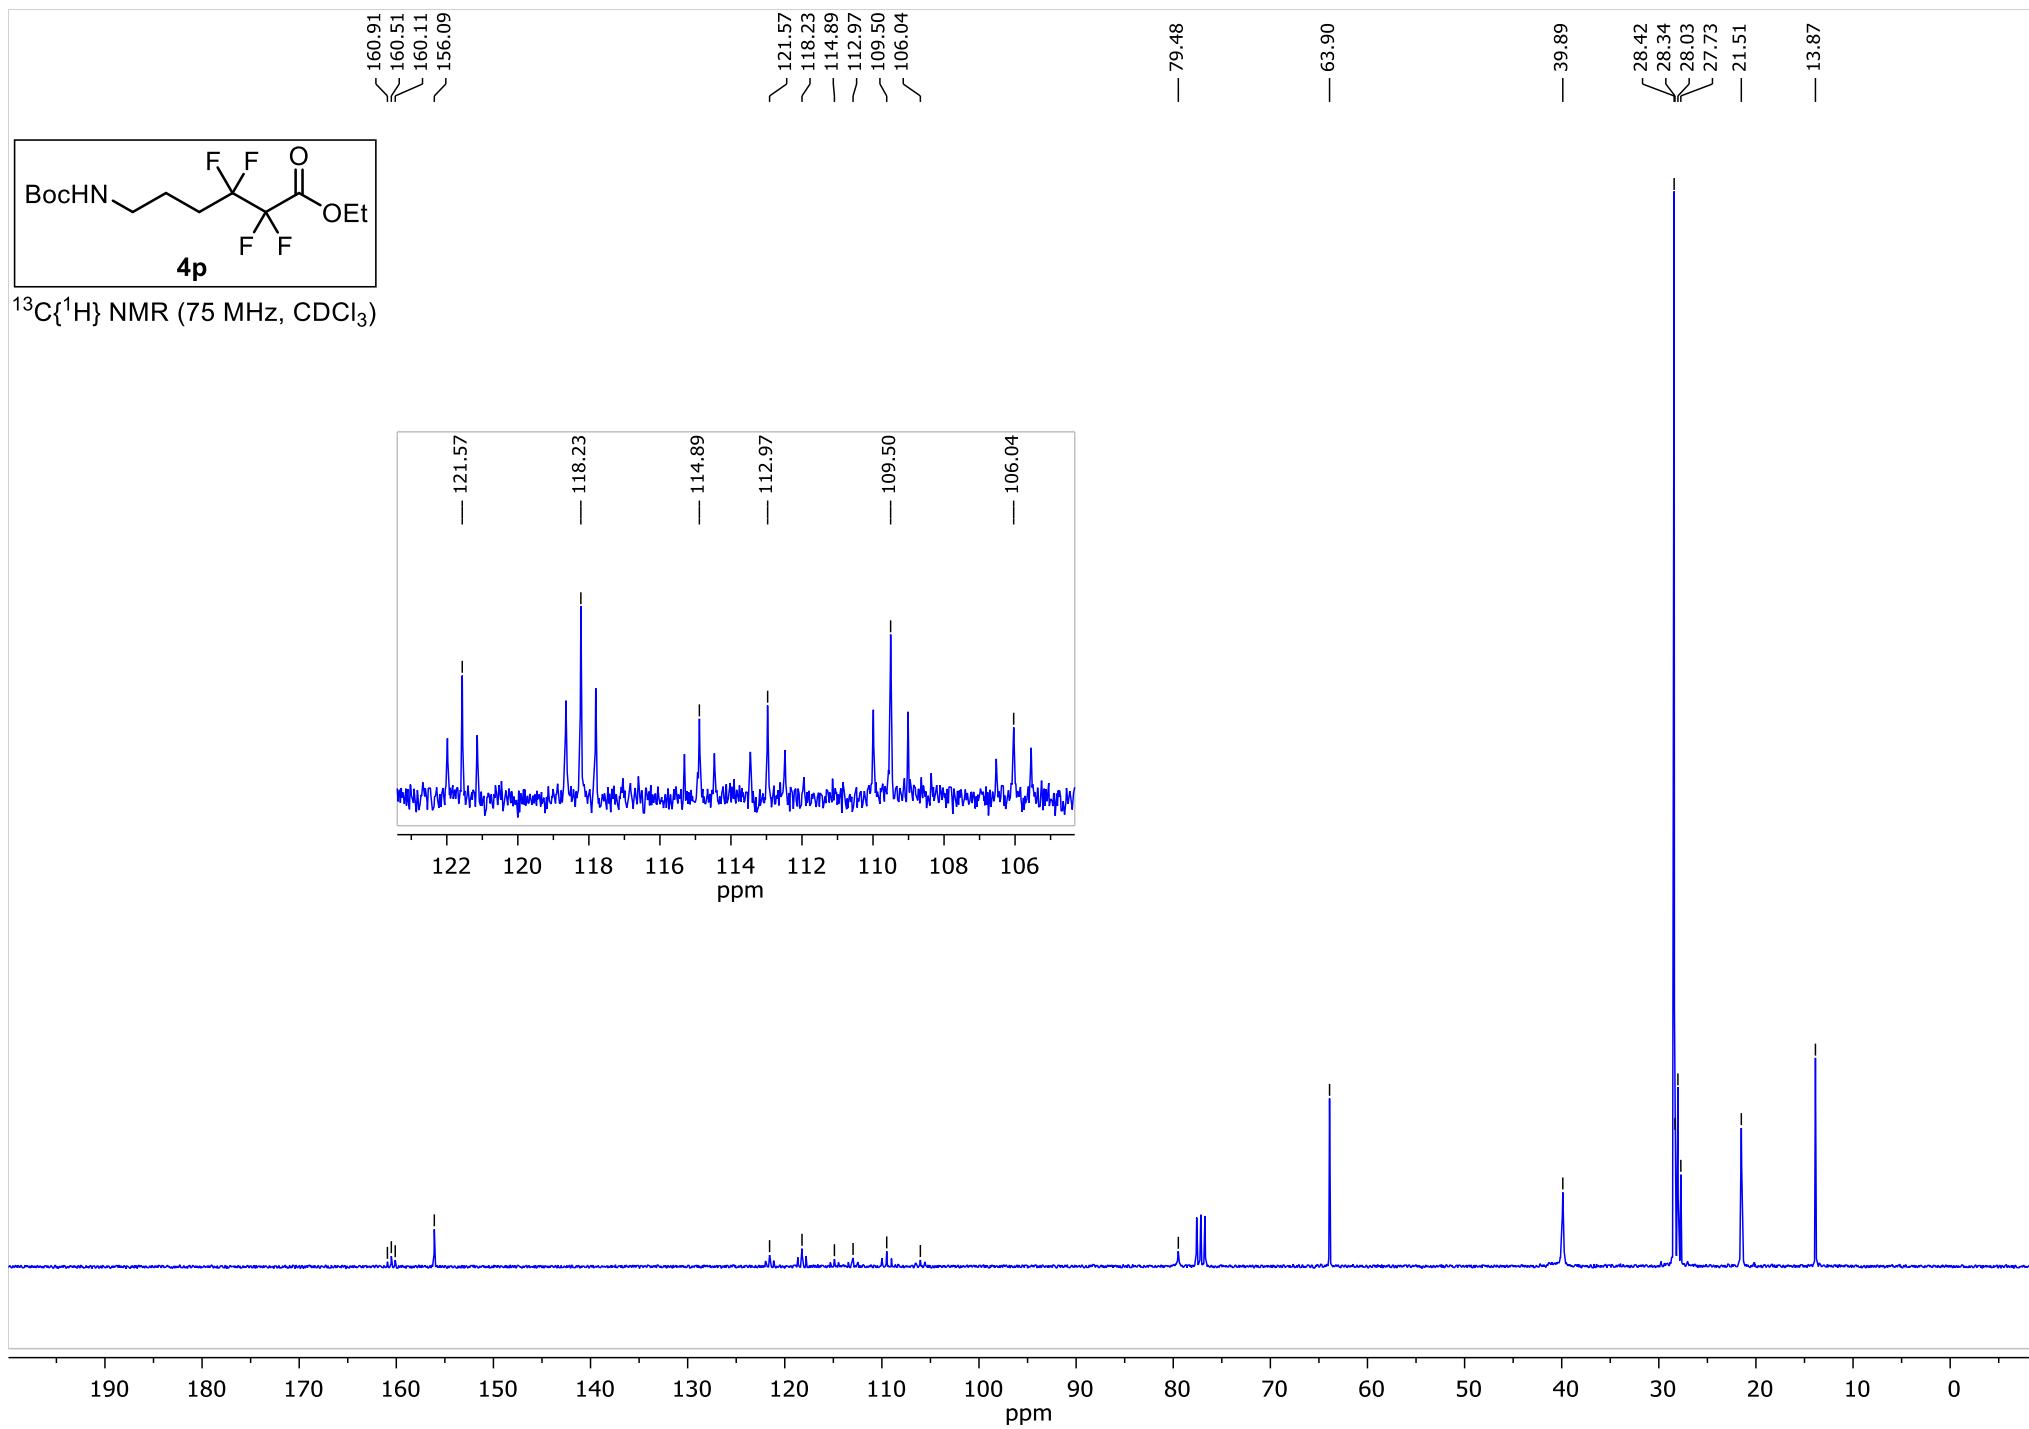

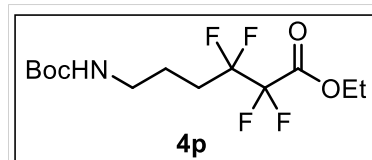

$^{19}\text{F}$  NMR (282 MHz,  $\text{CDCl}_3$ )

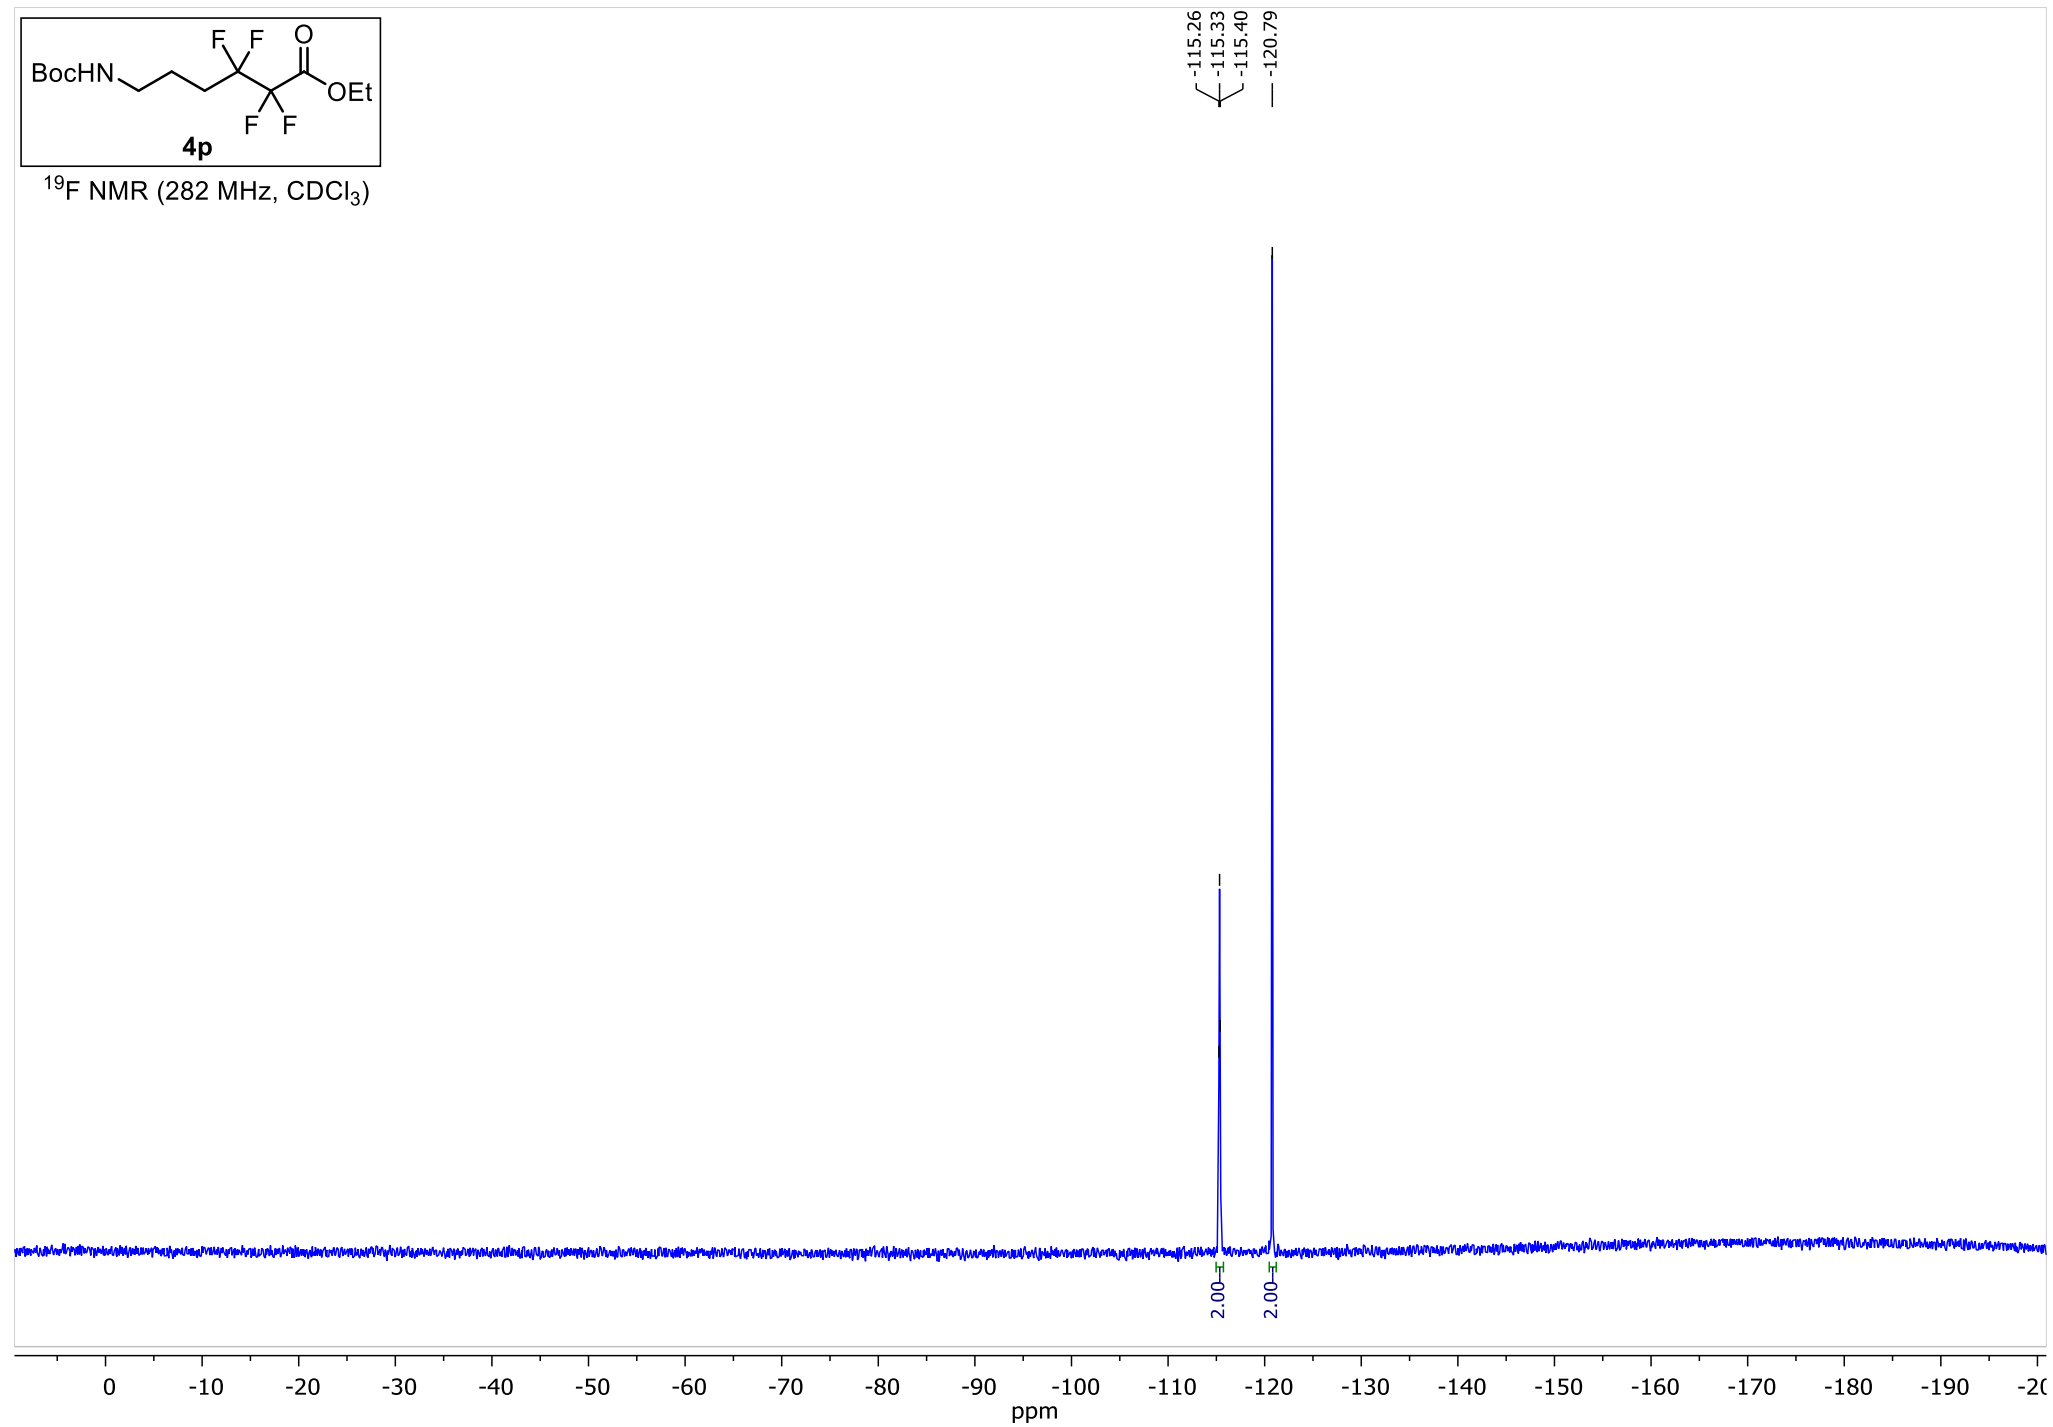

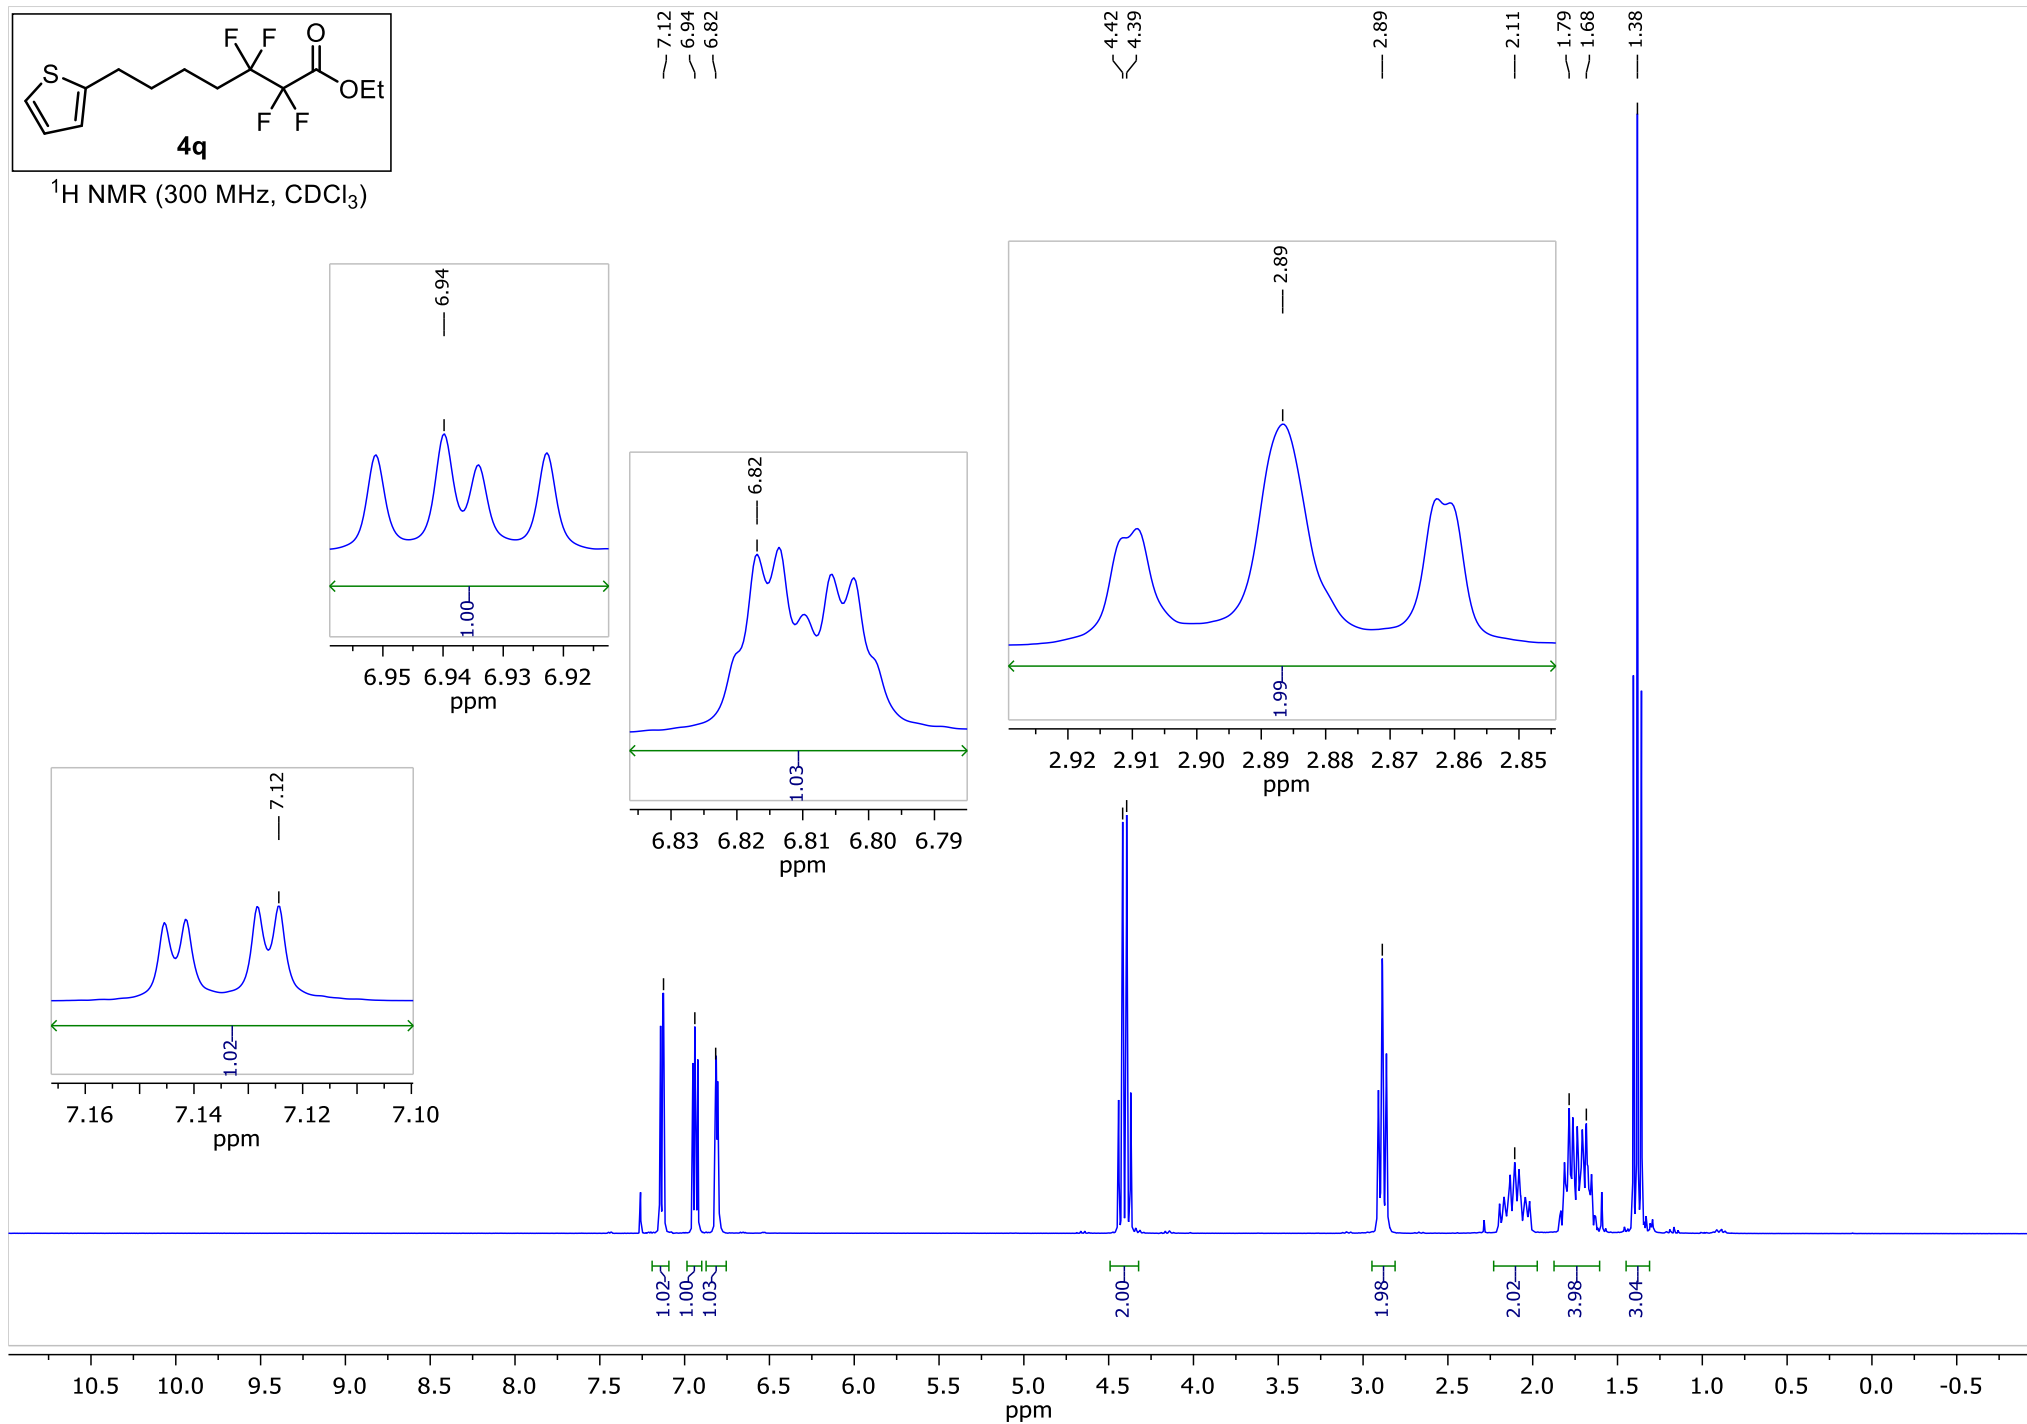

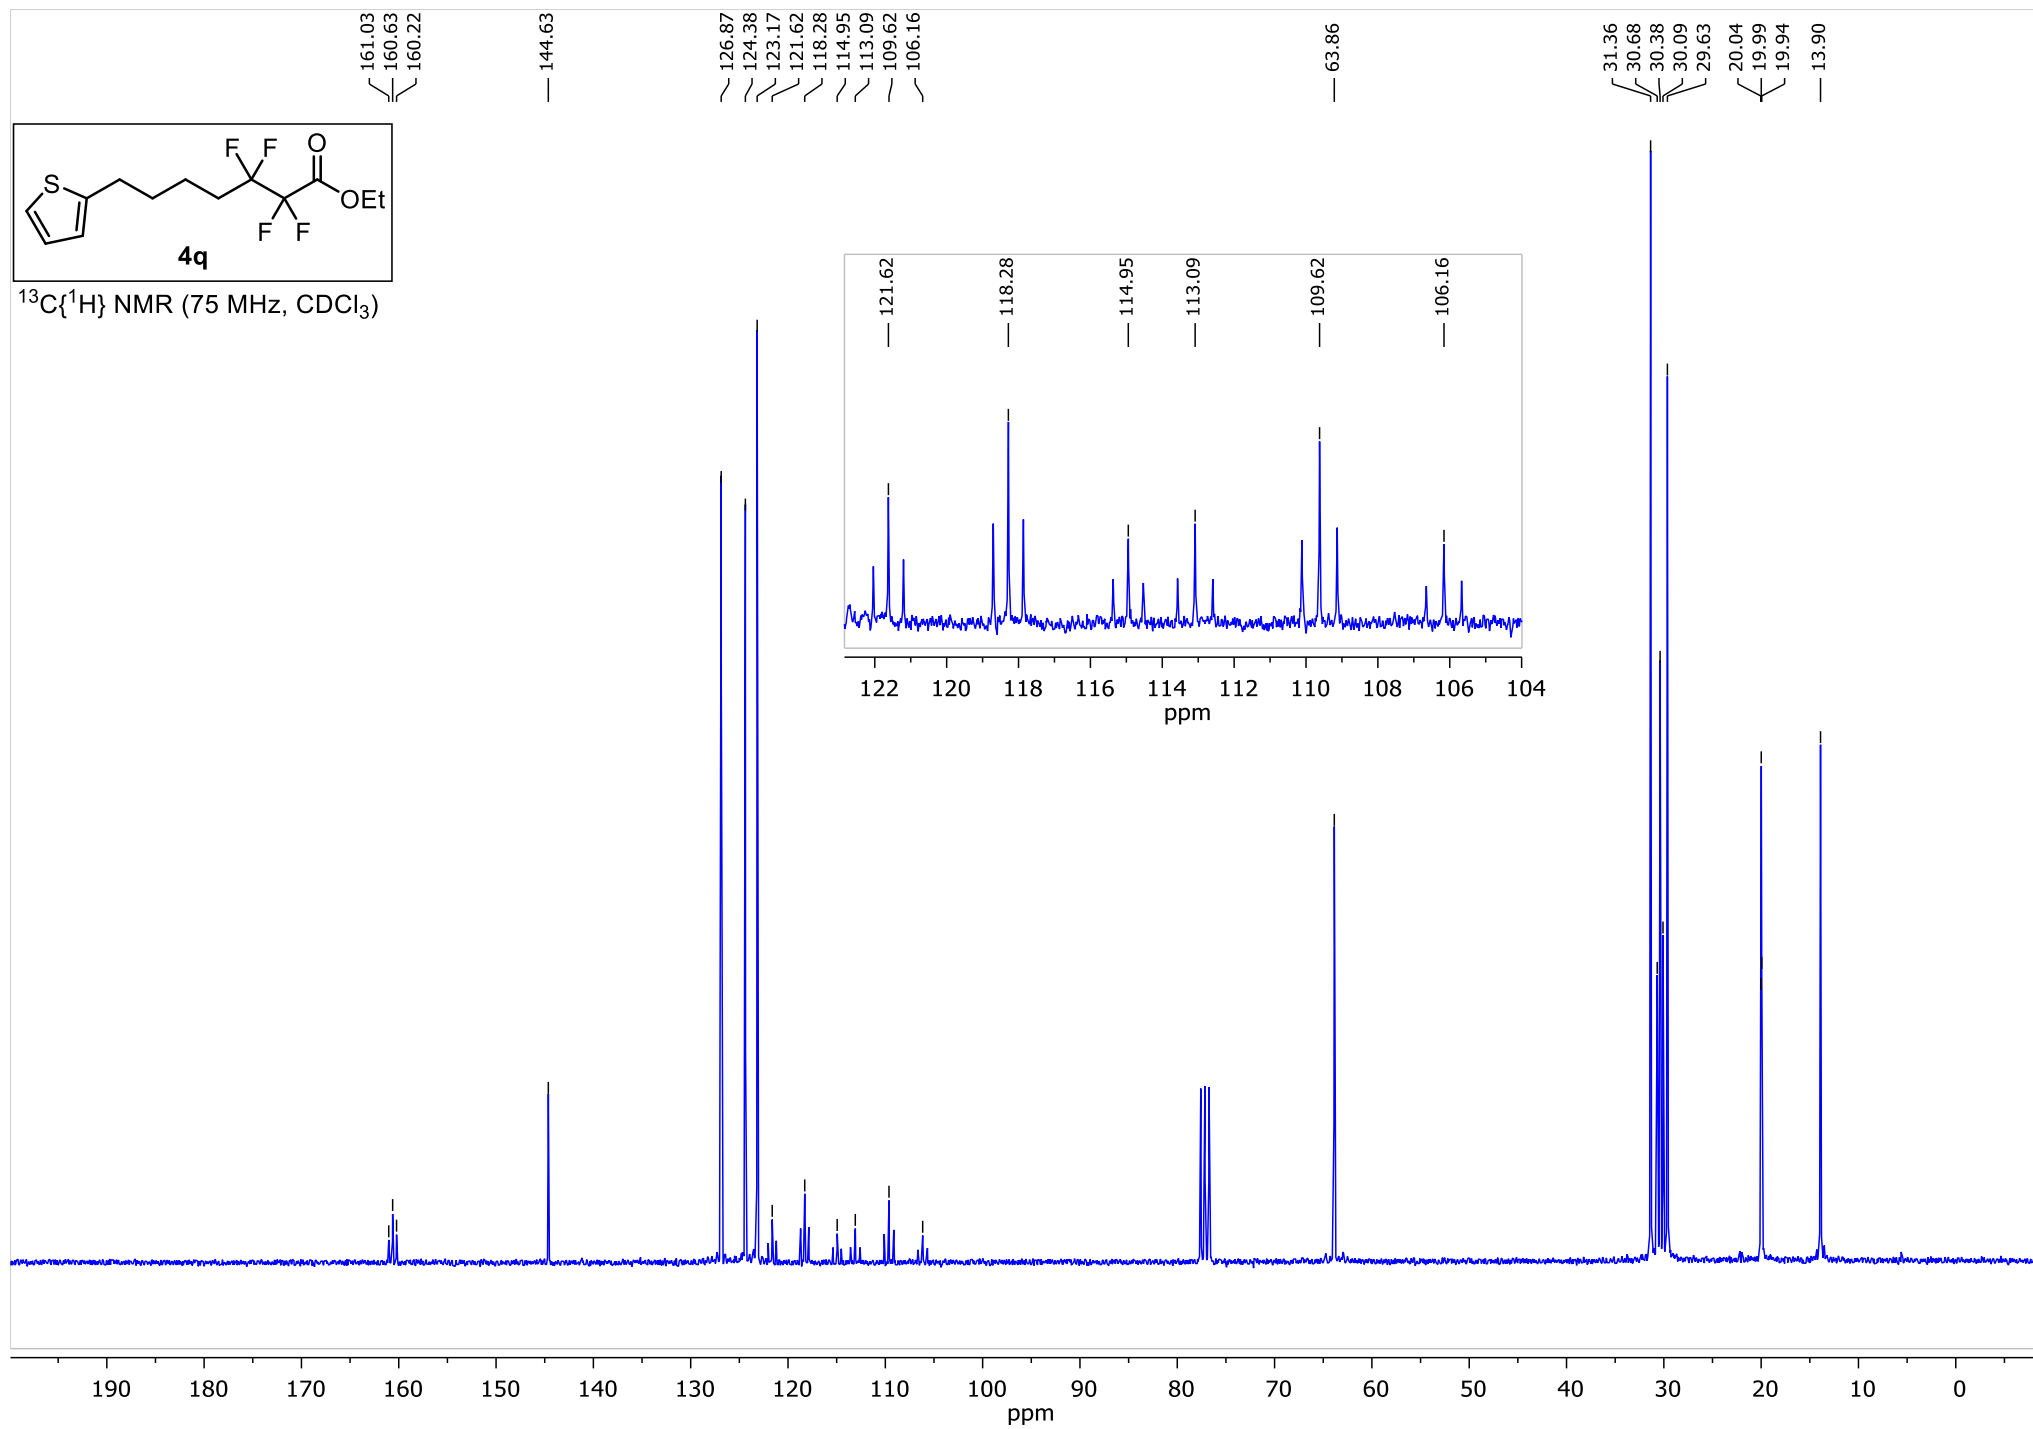

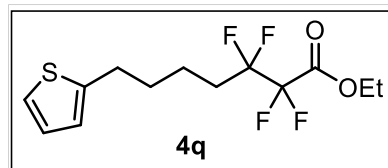

$^{19}\text{F}$  NMR (282 MHz,  $\text{CDCl}_3$ )

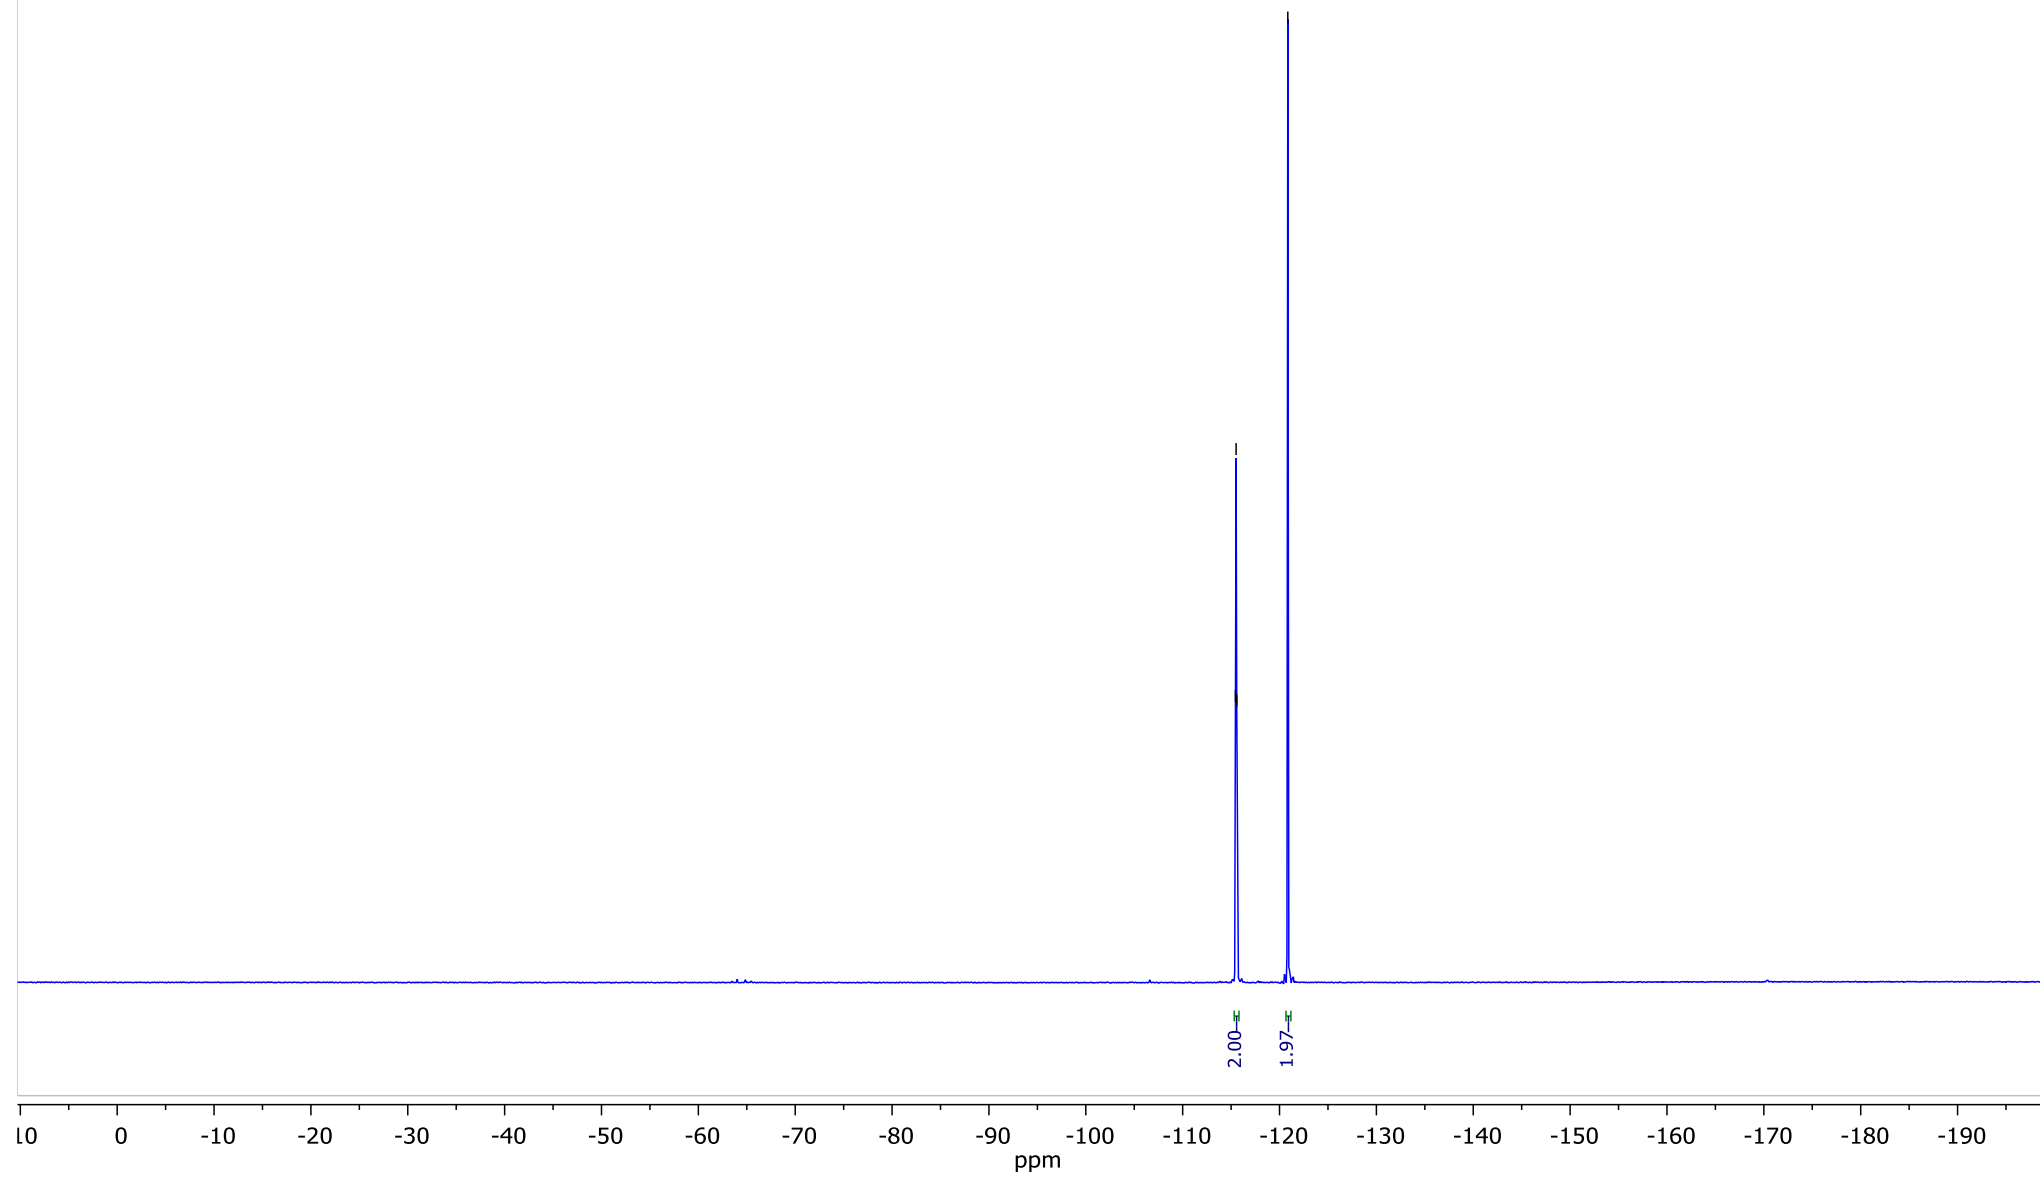

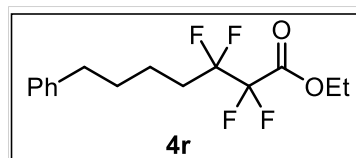

$^1\text{H}$  NMR (300 MHz,  $\text{CDCl}_3$ )

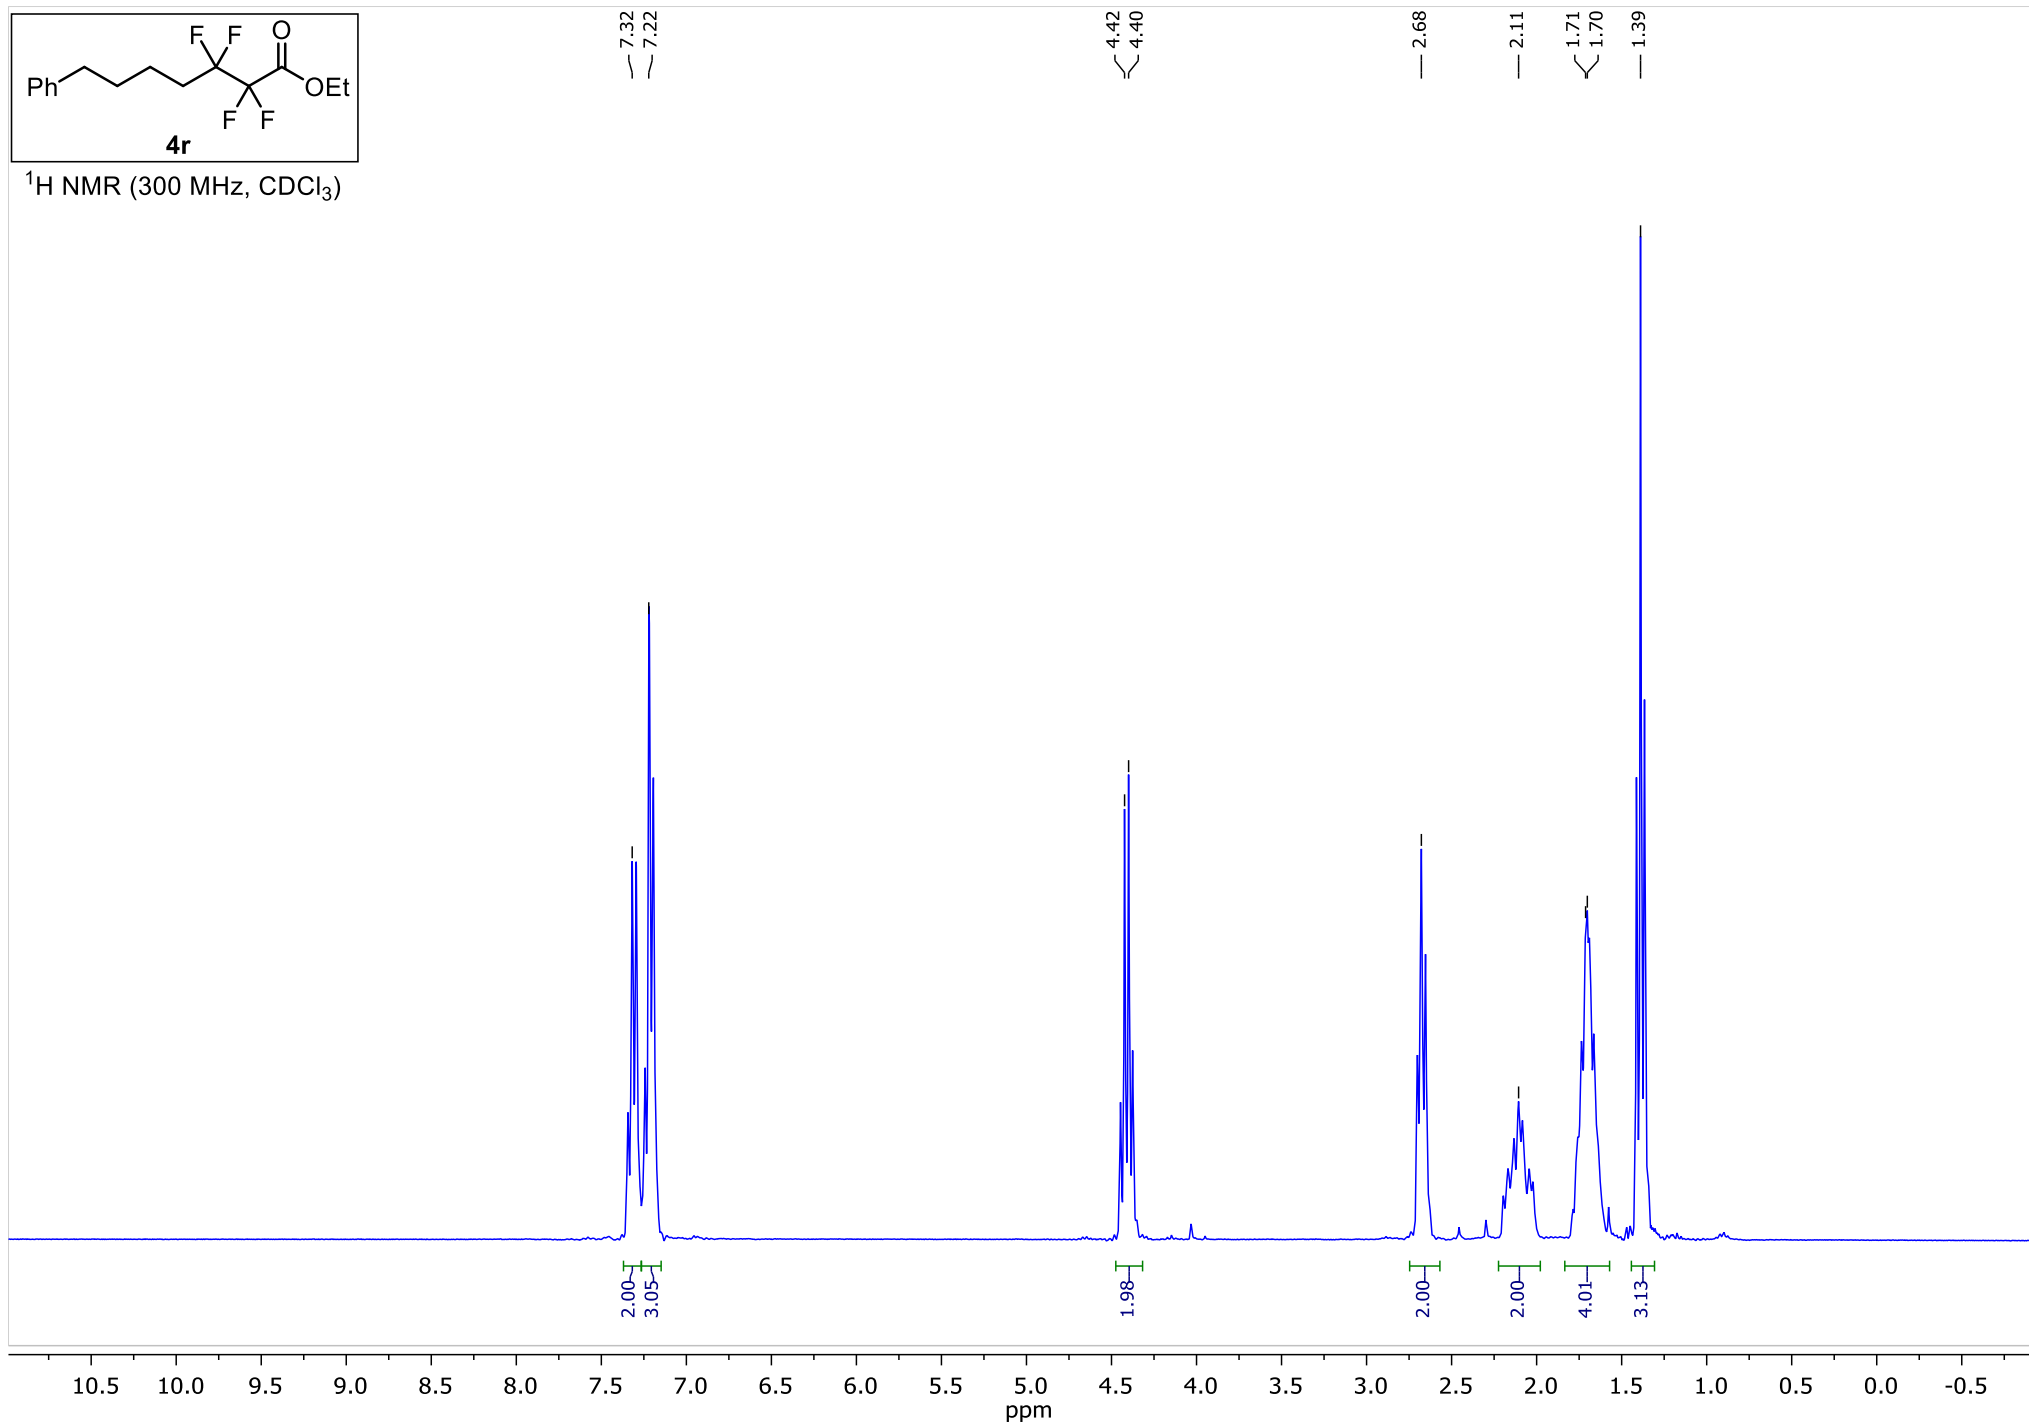

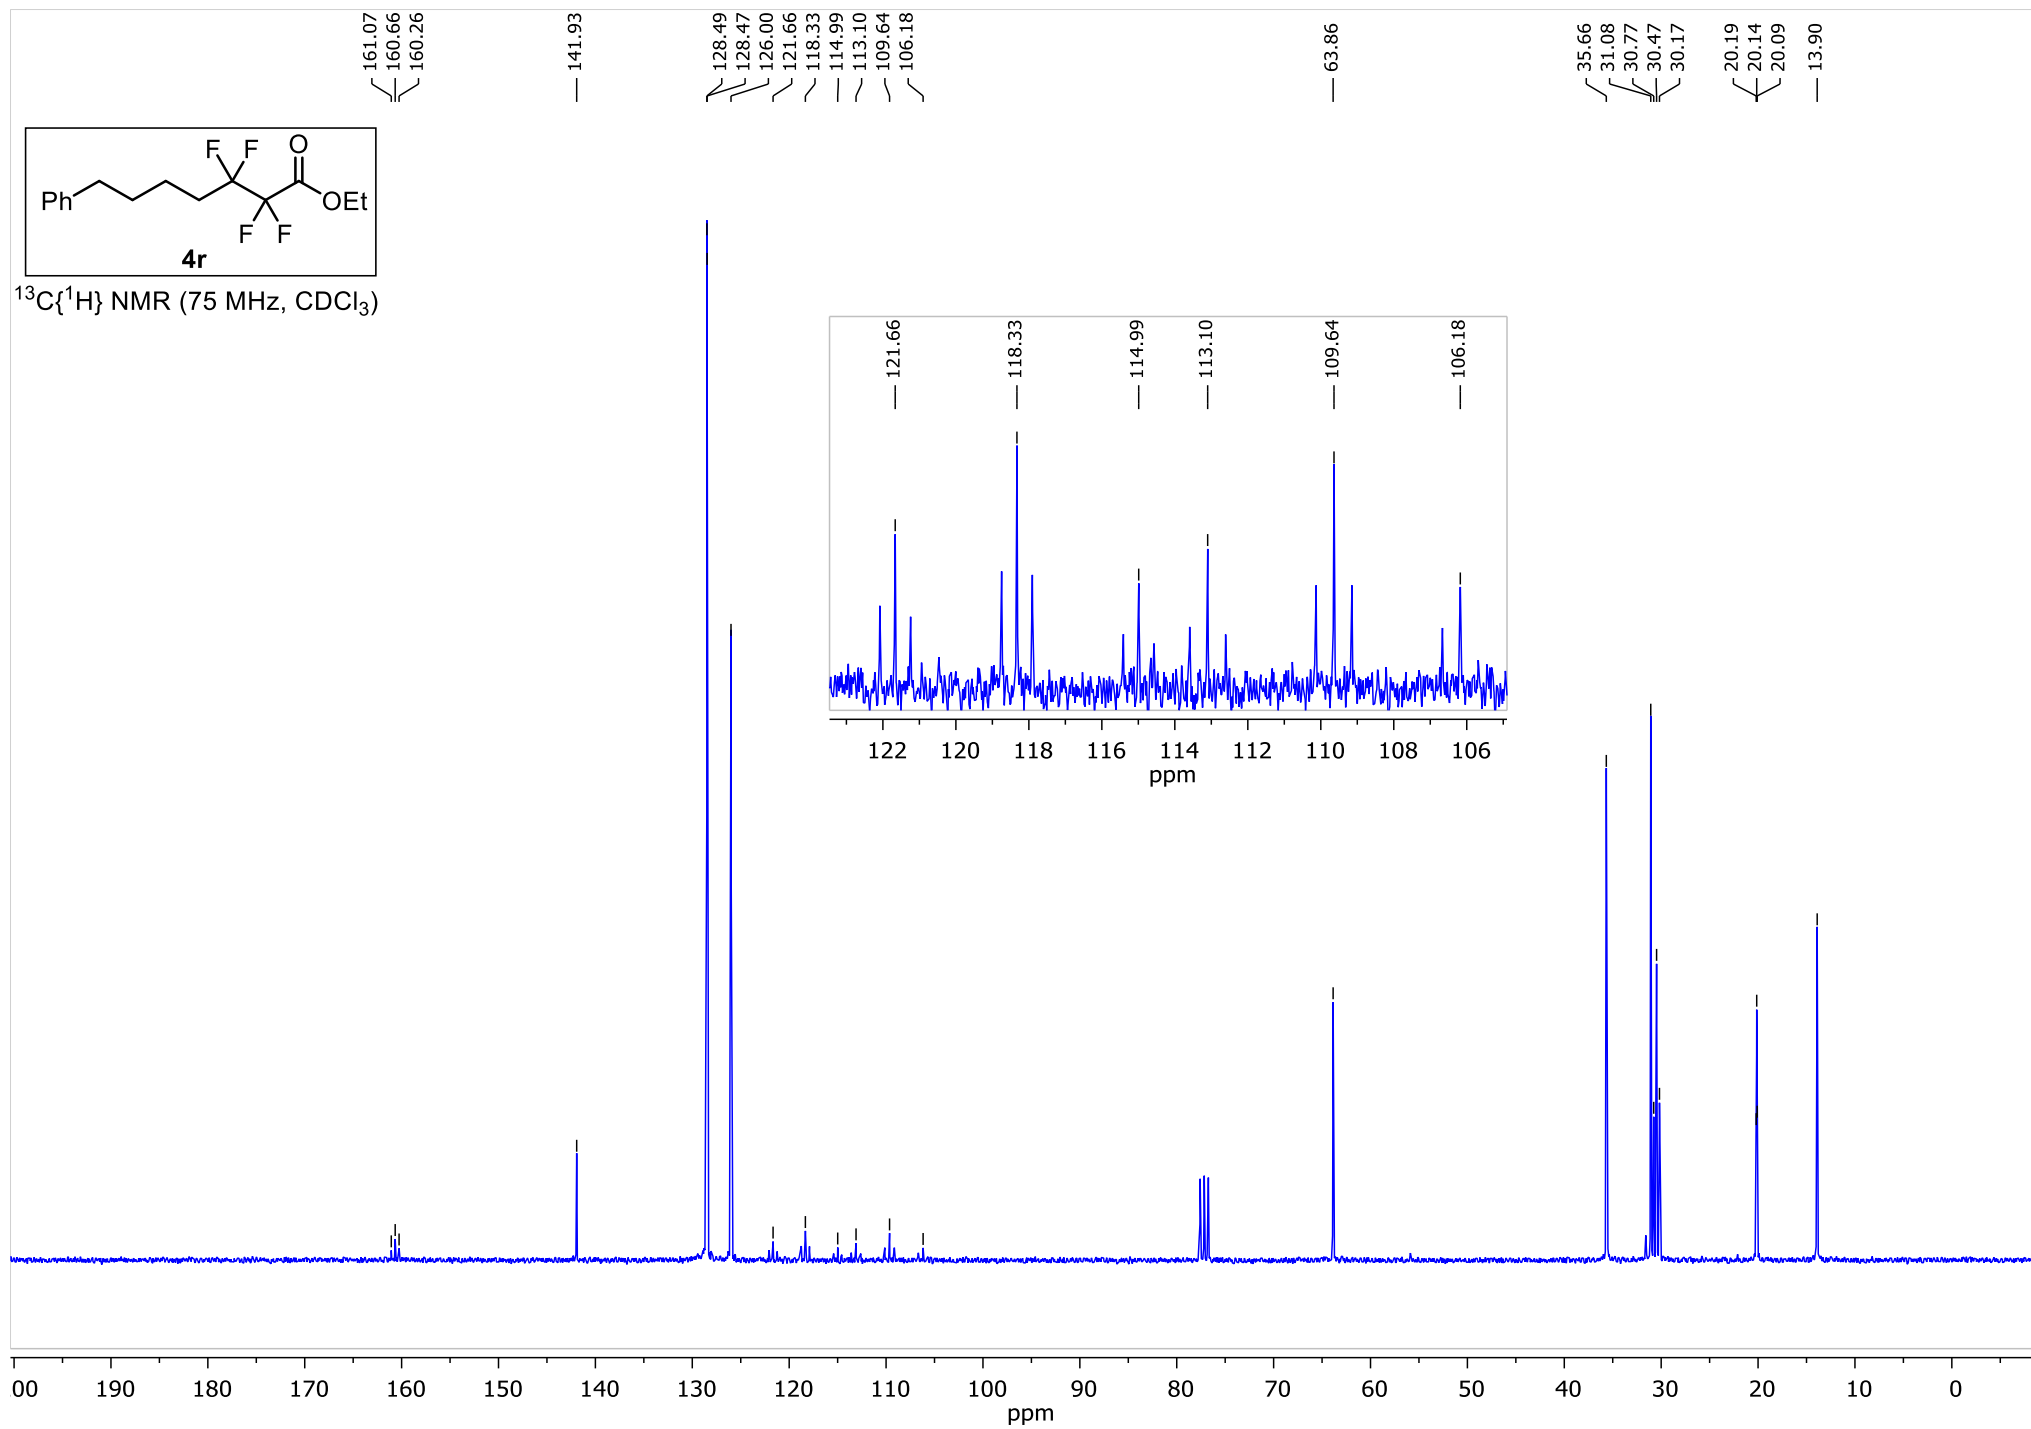



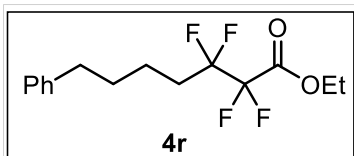

$^{19}\text{F}$  NMR (282 MHz,  $\text{CDCl}_3$ )

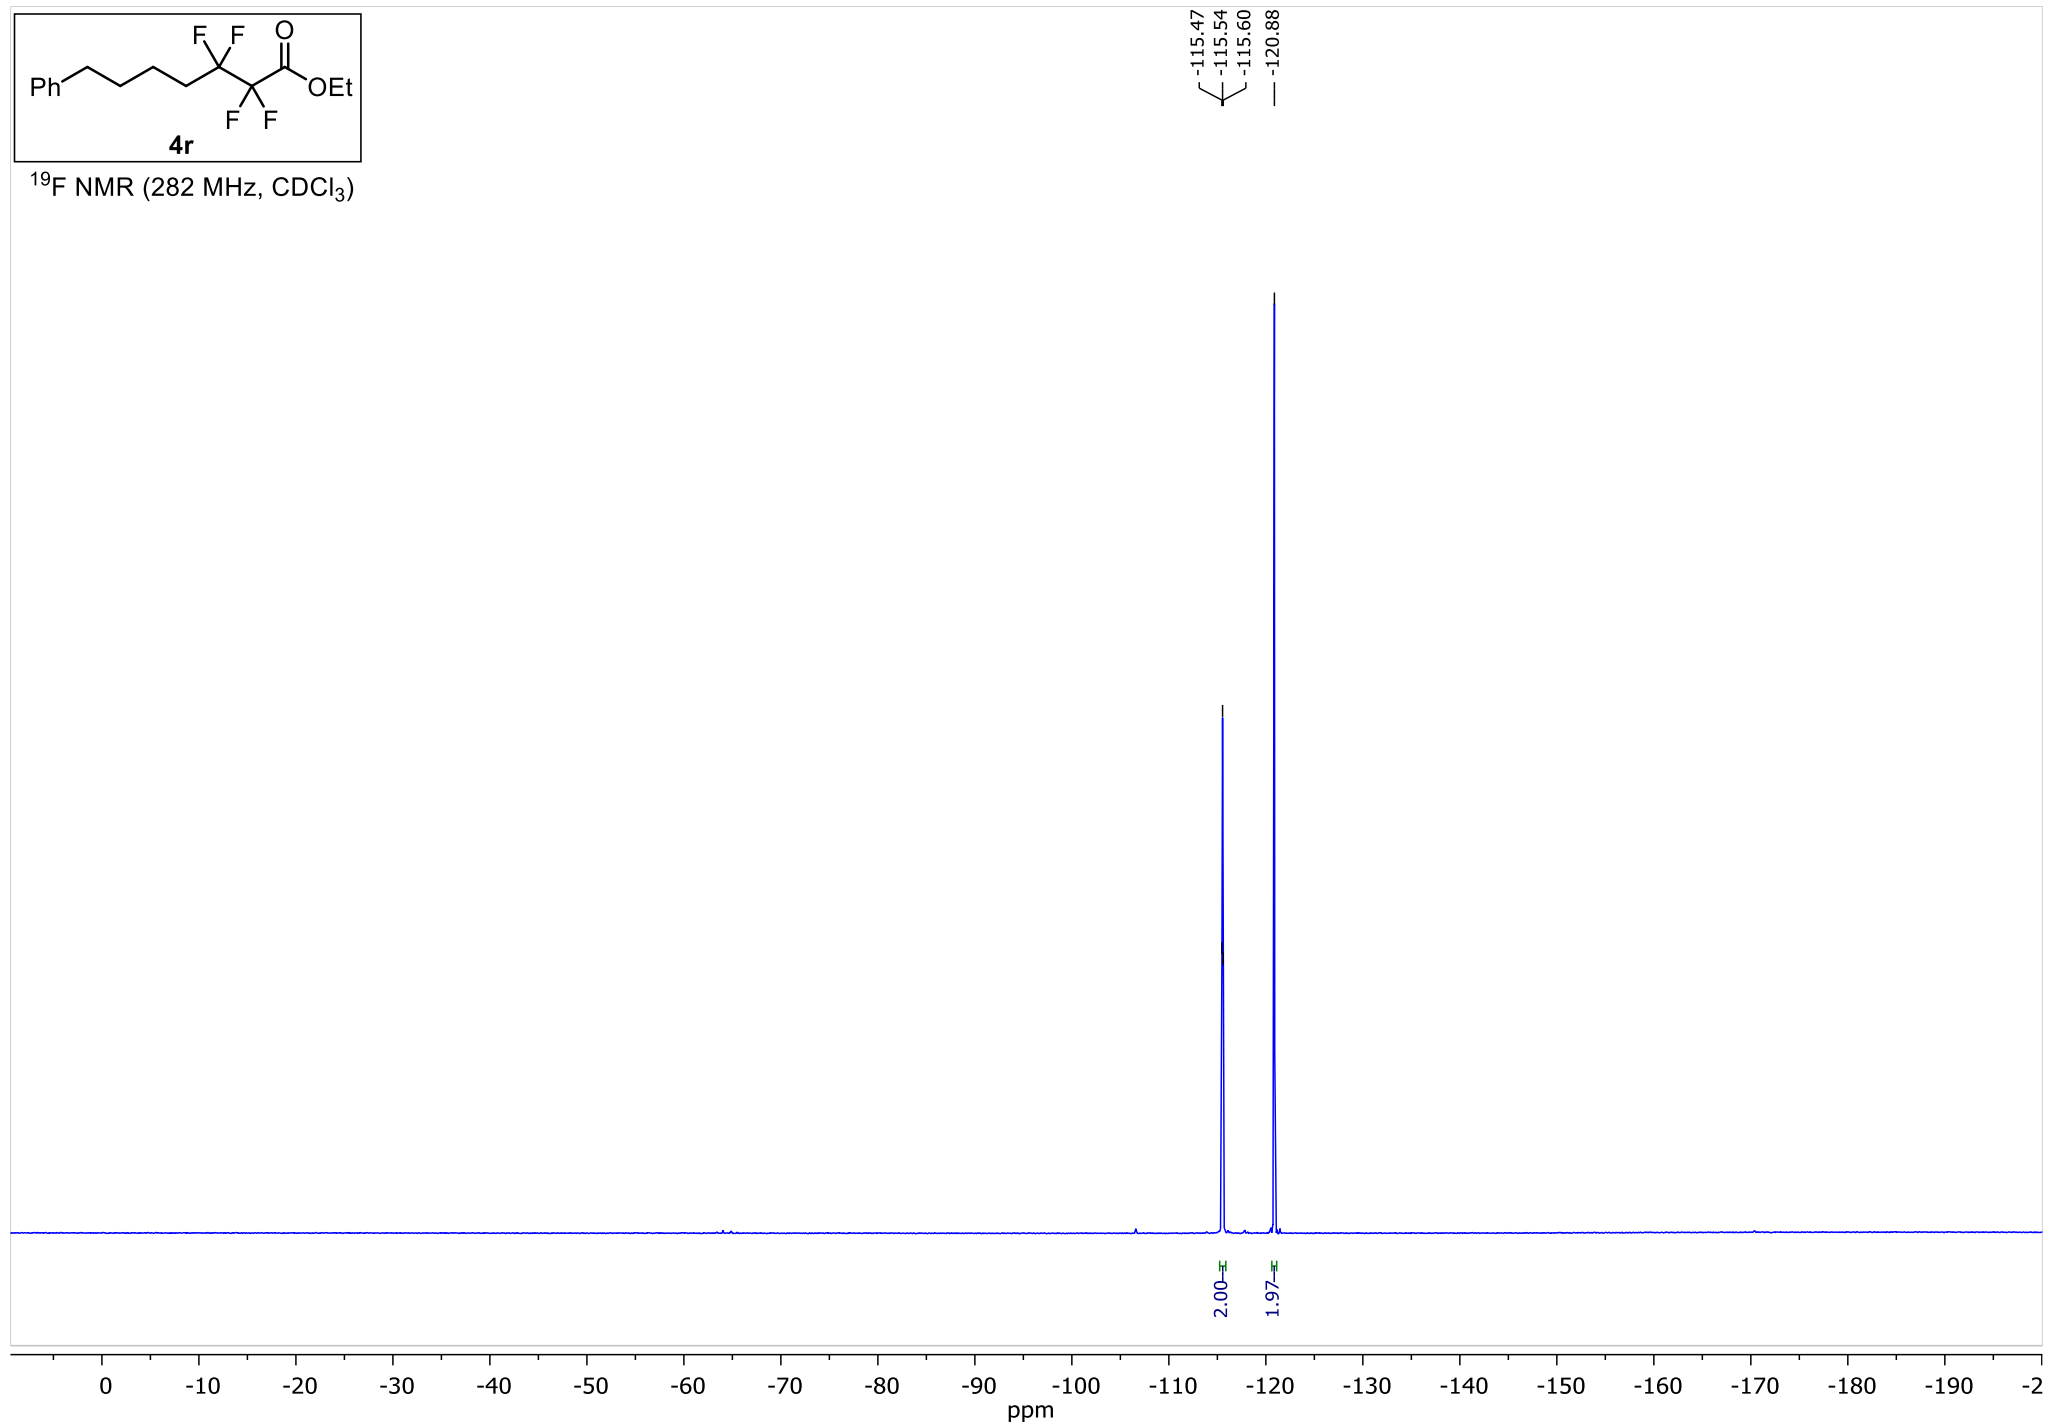

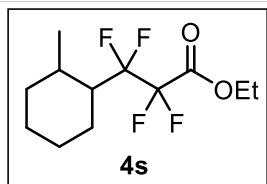

$^1\text{H NMR}$  (300 MHz,  $\text{CDCl}_3$ )

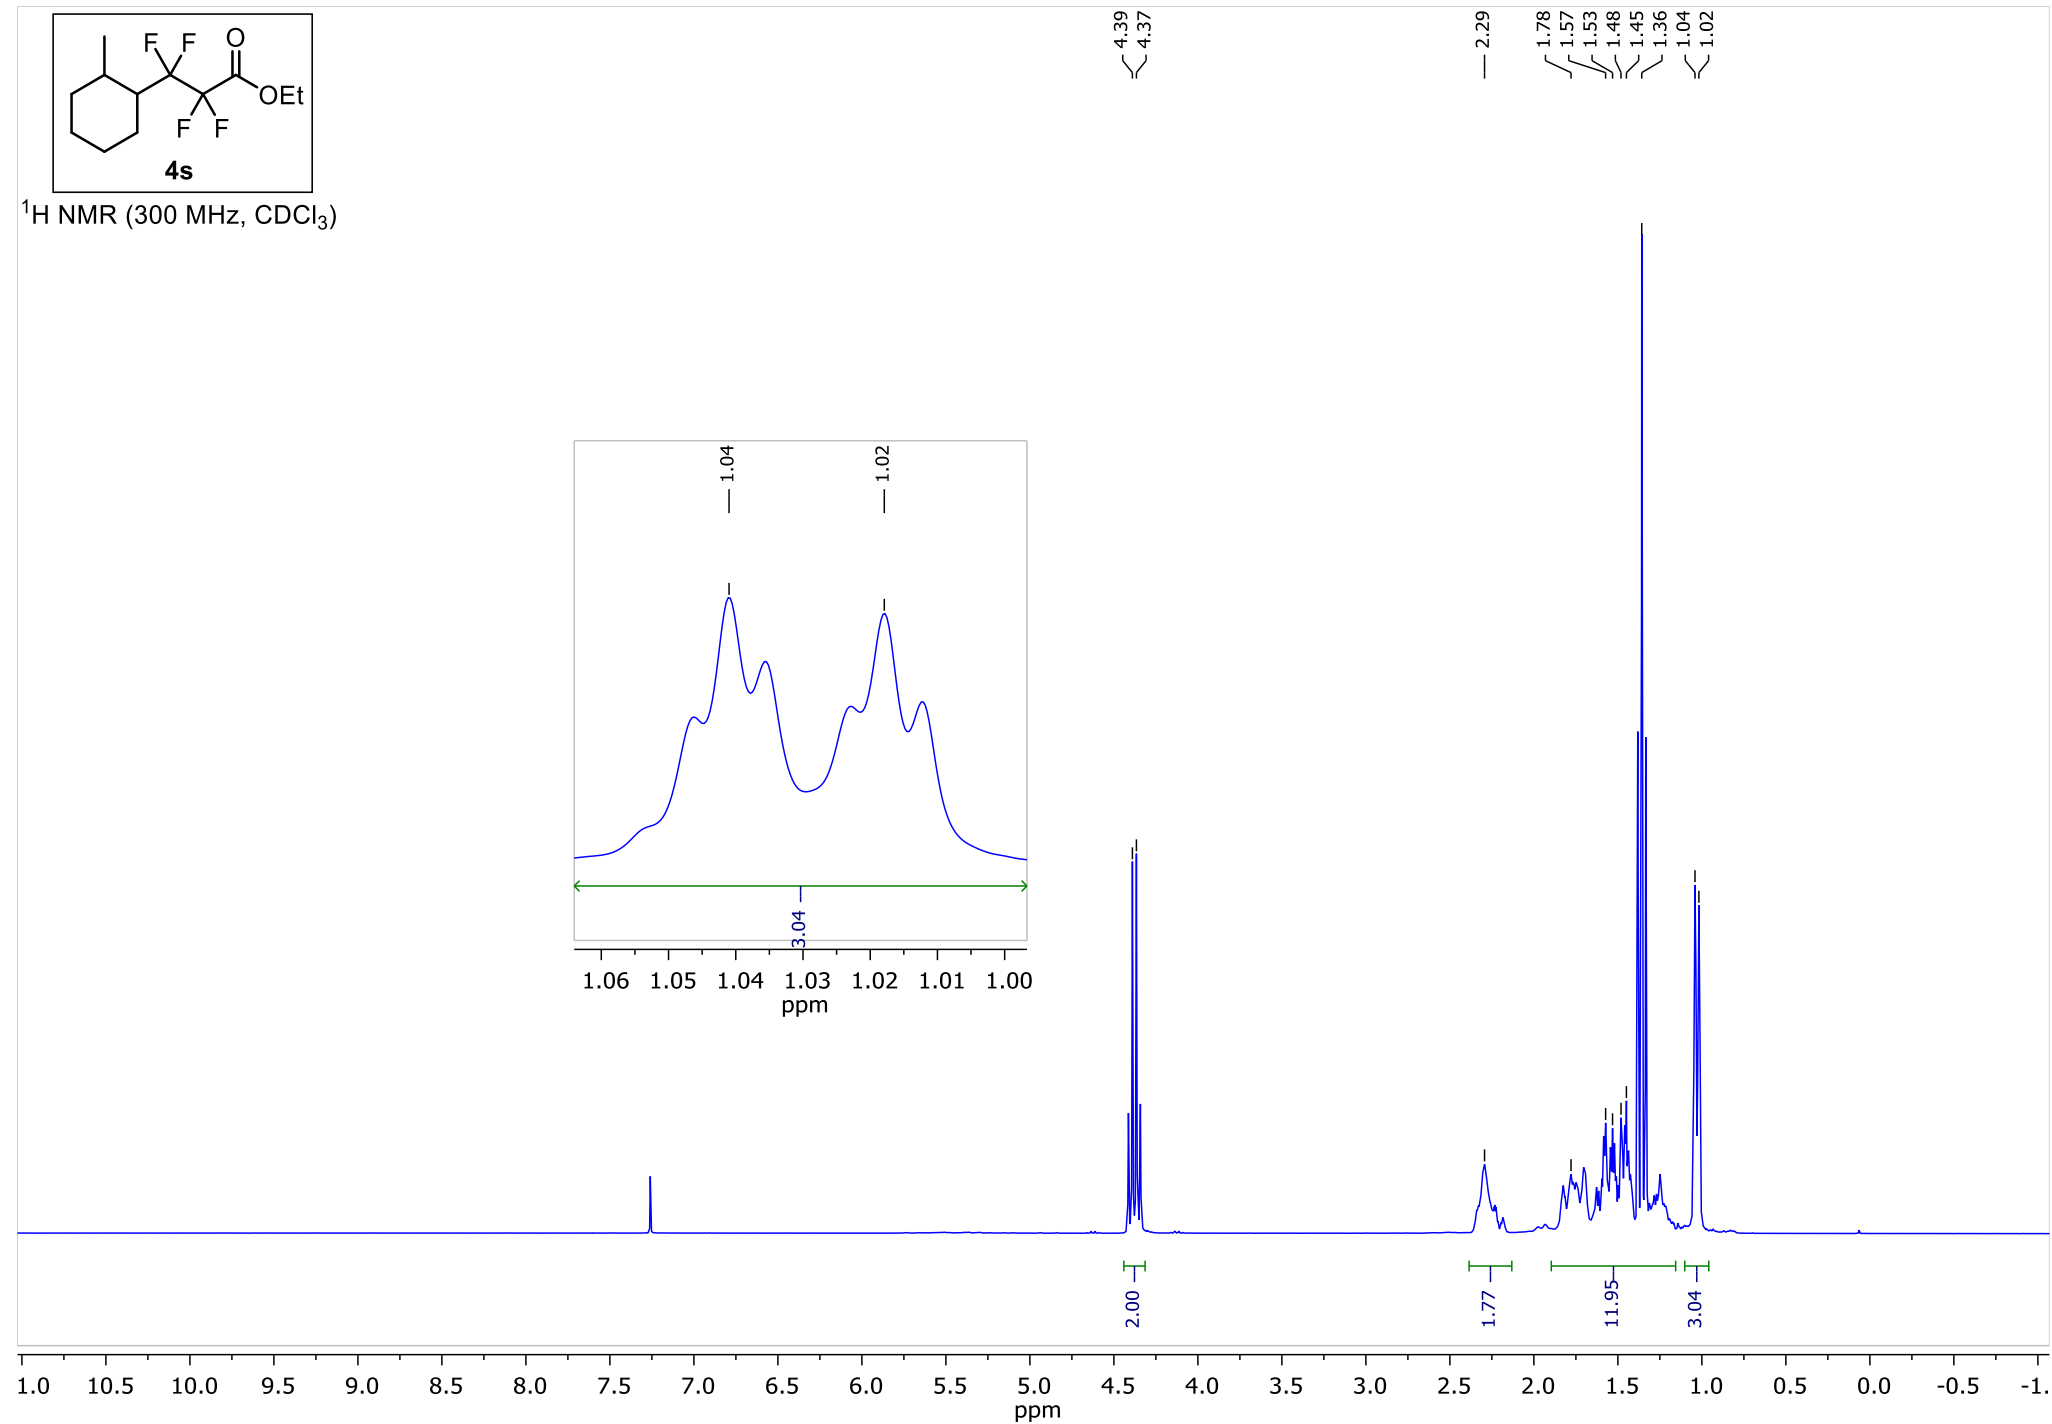

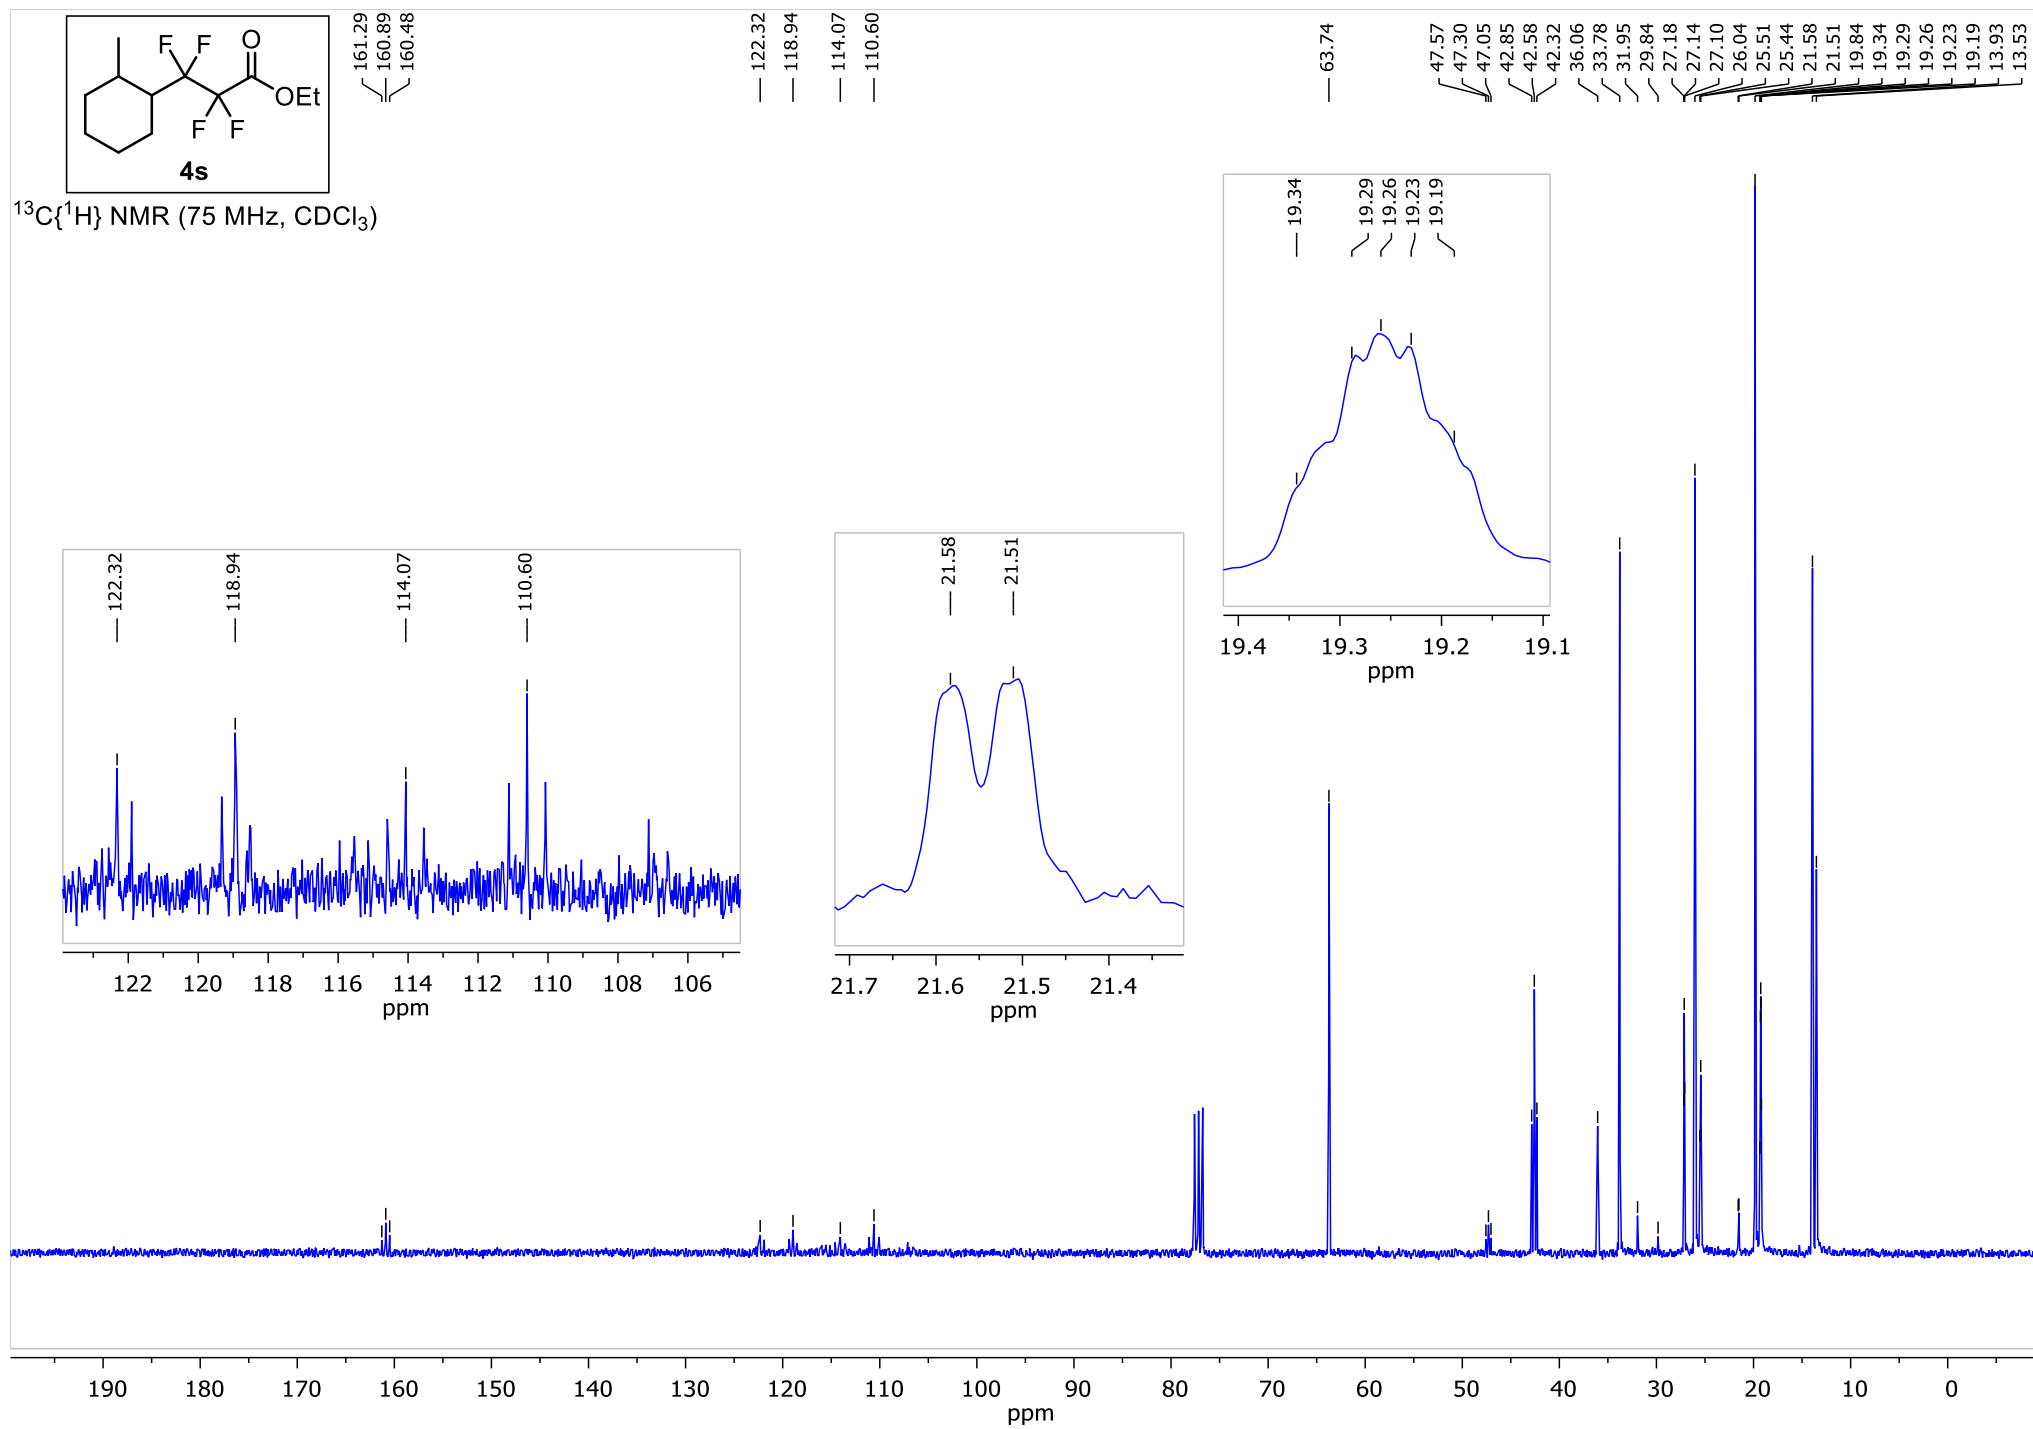

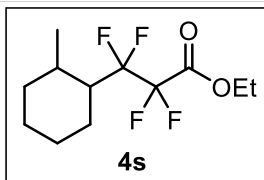

$^{19}\text{F}$  NMR (282 MHz,  $\text{CDCl}_3$ )

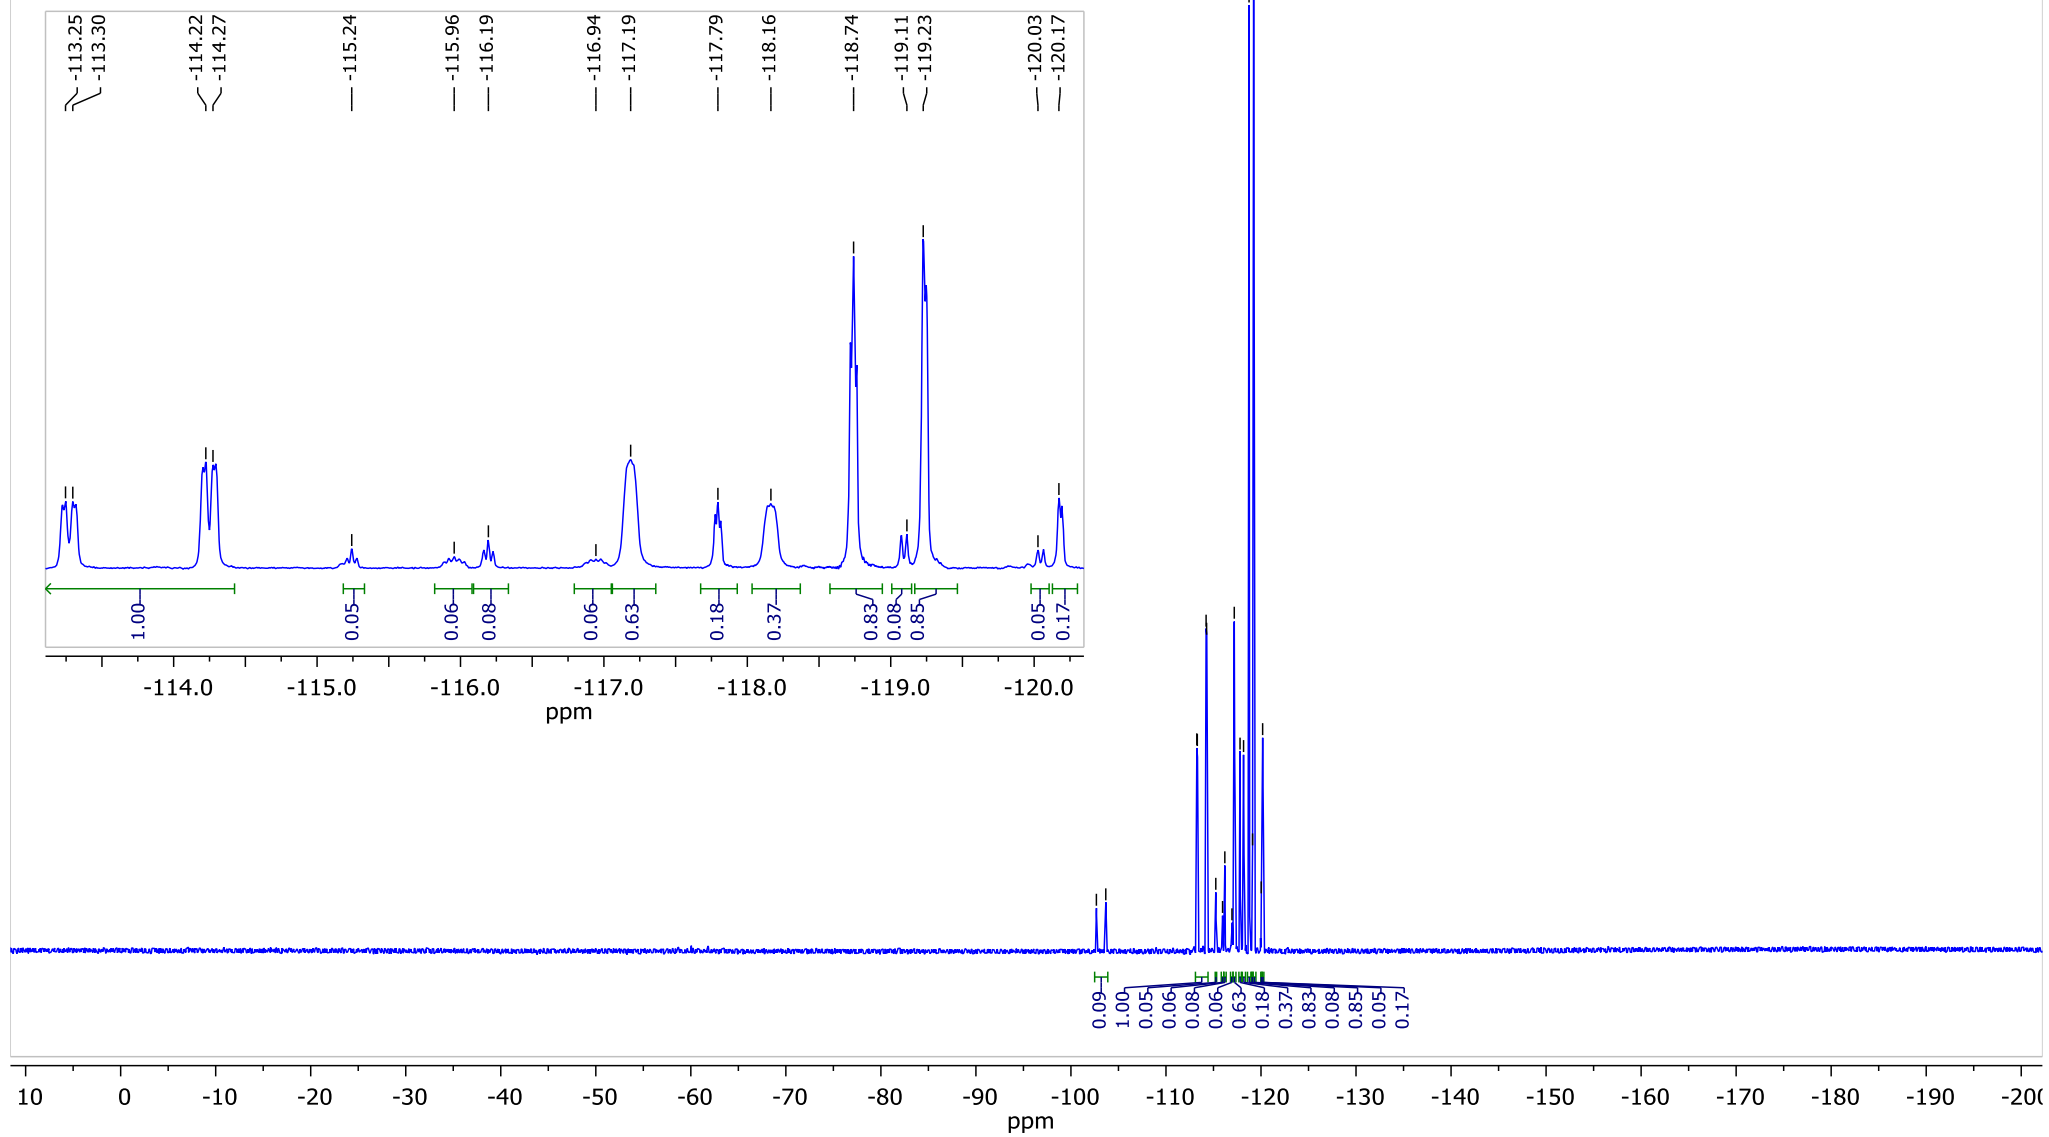

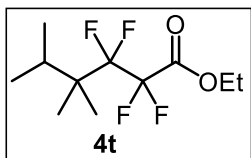

$^1\text{H NMR}$  (300 MHz,  $\text{CDCl}_3$ )

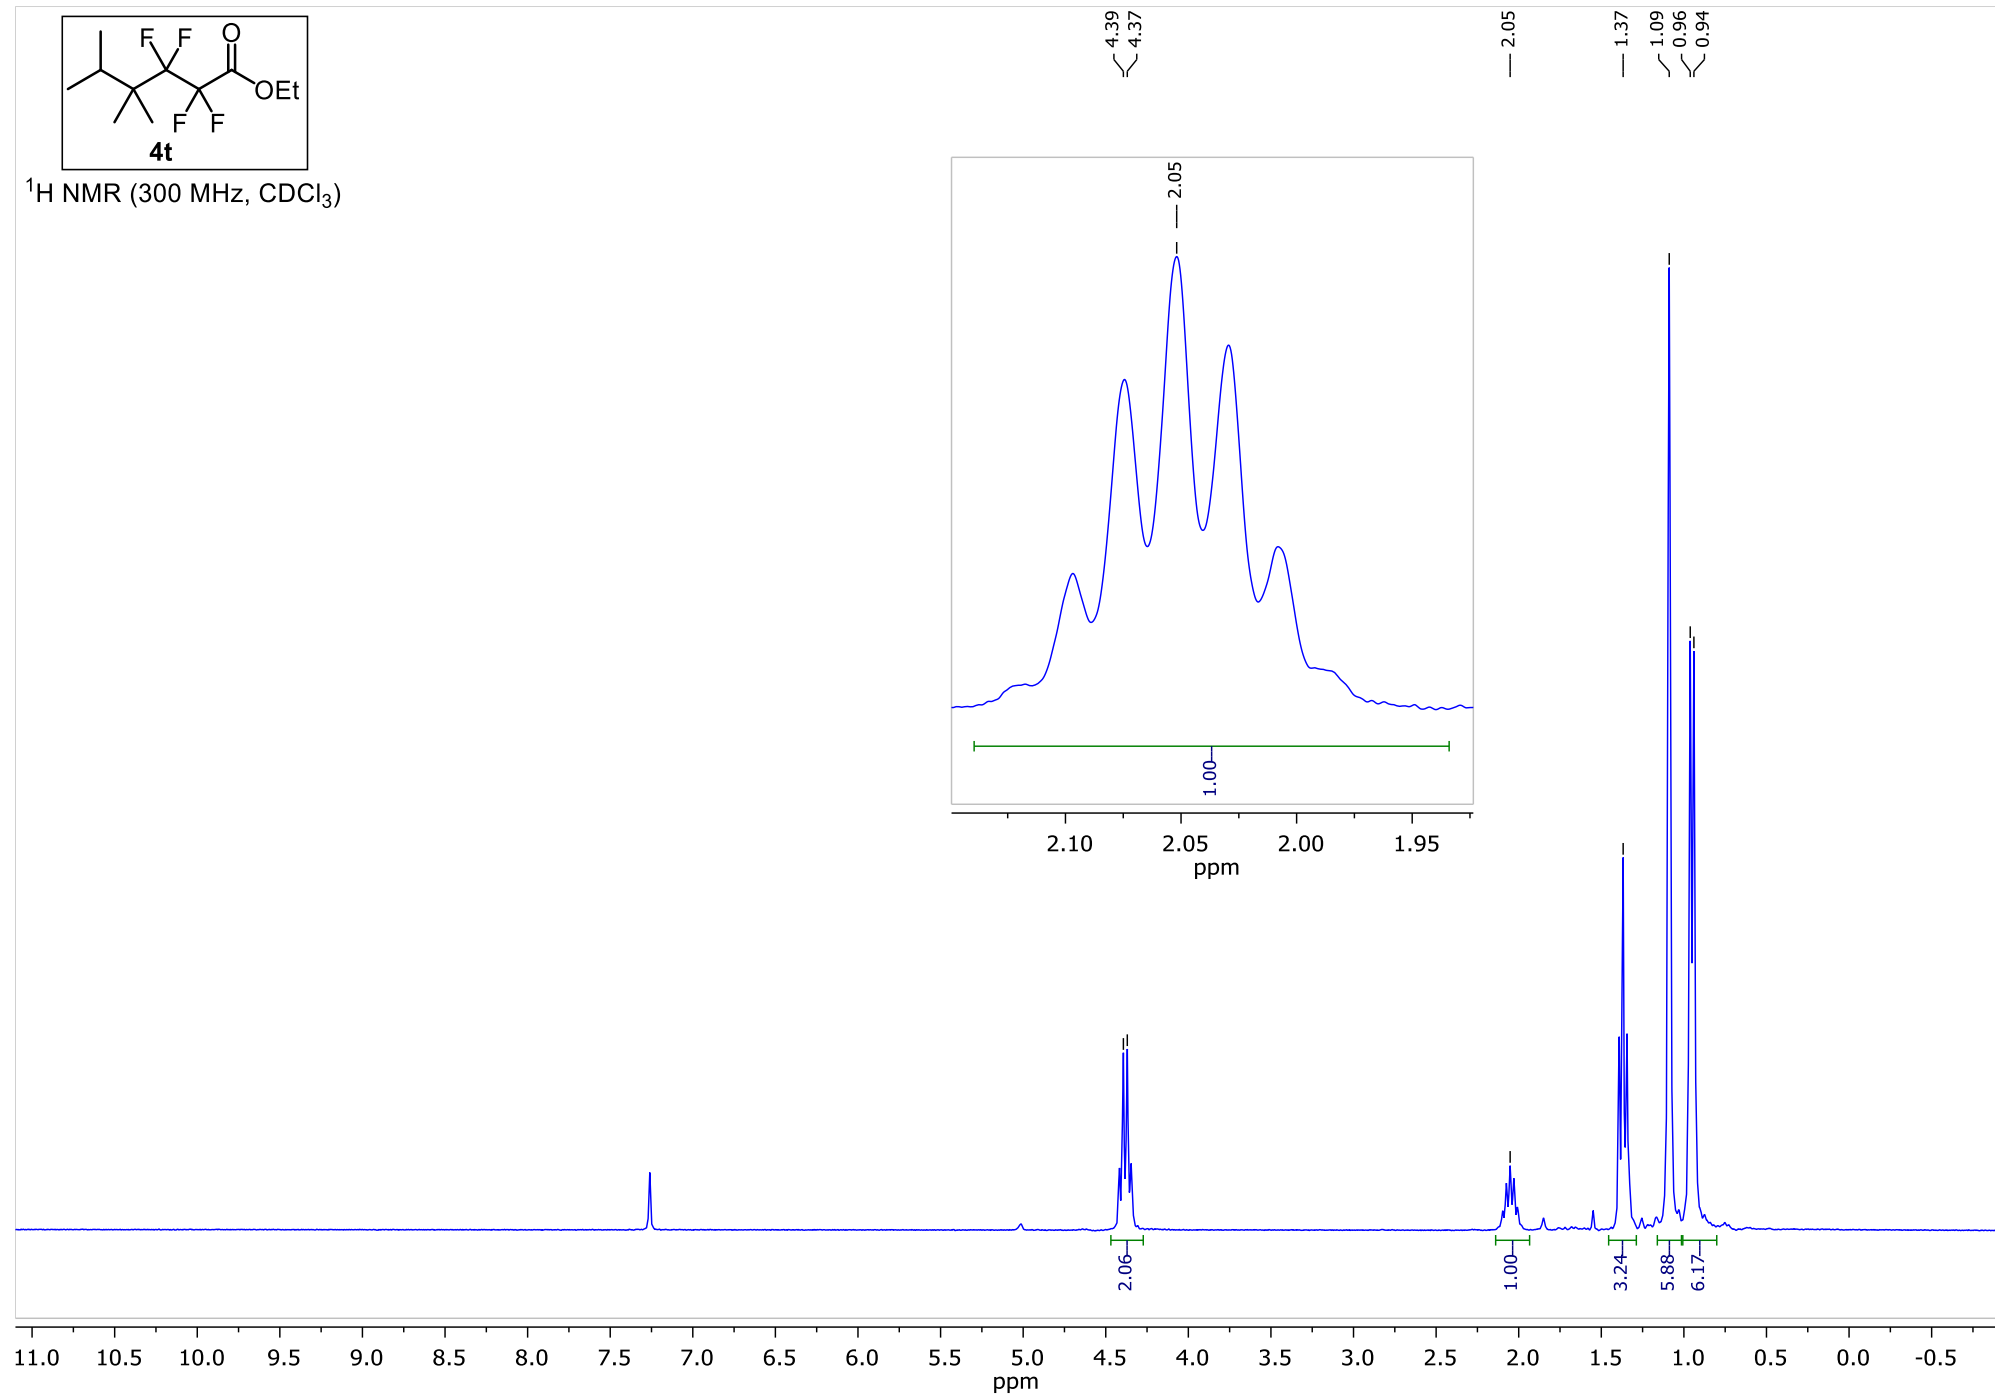

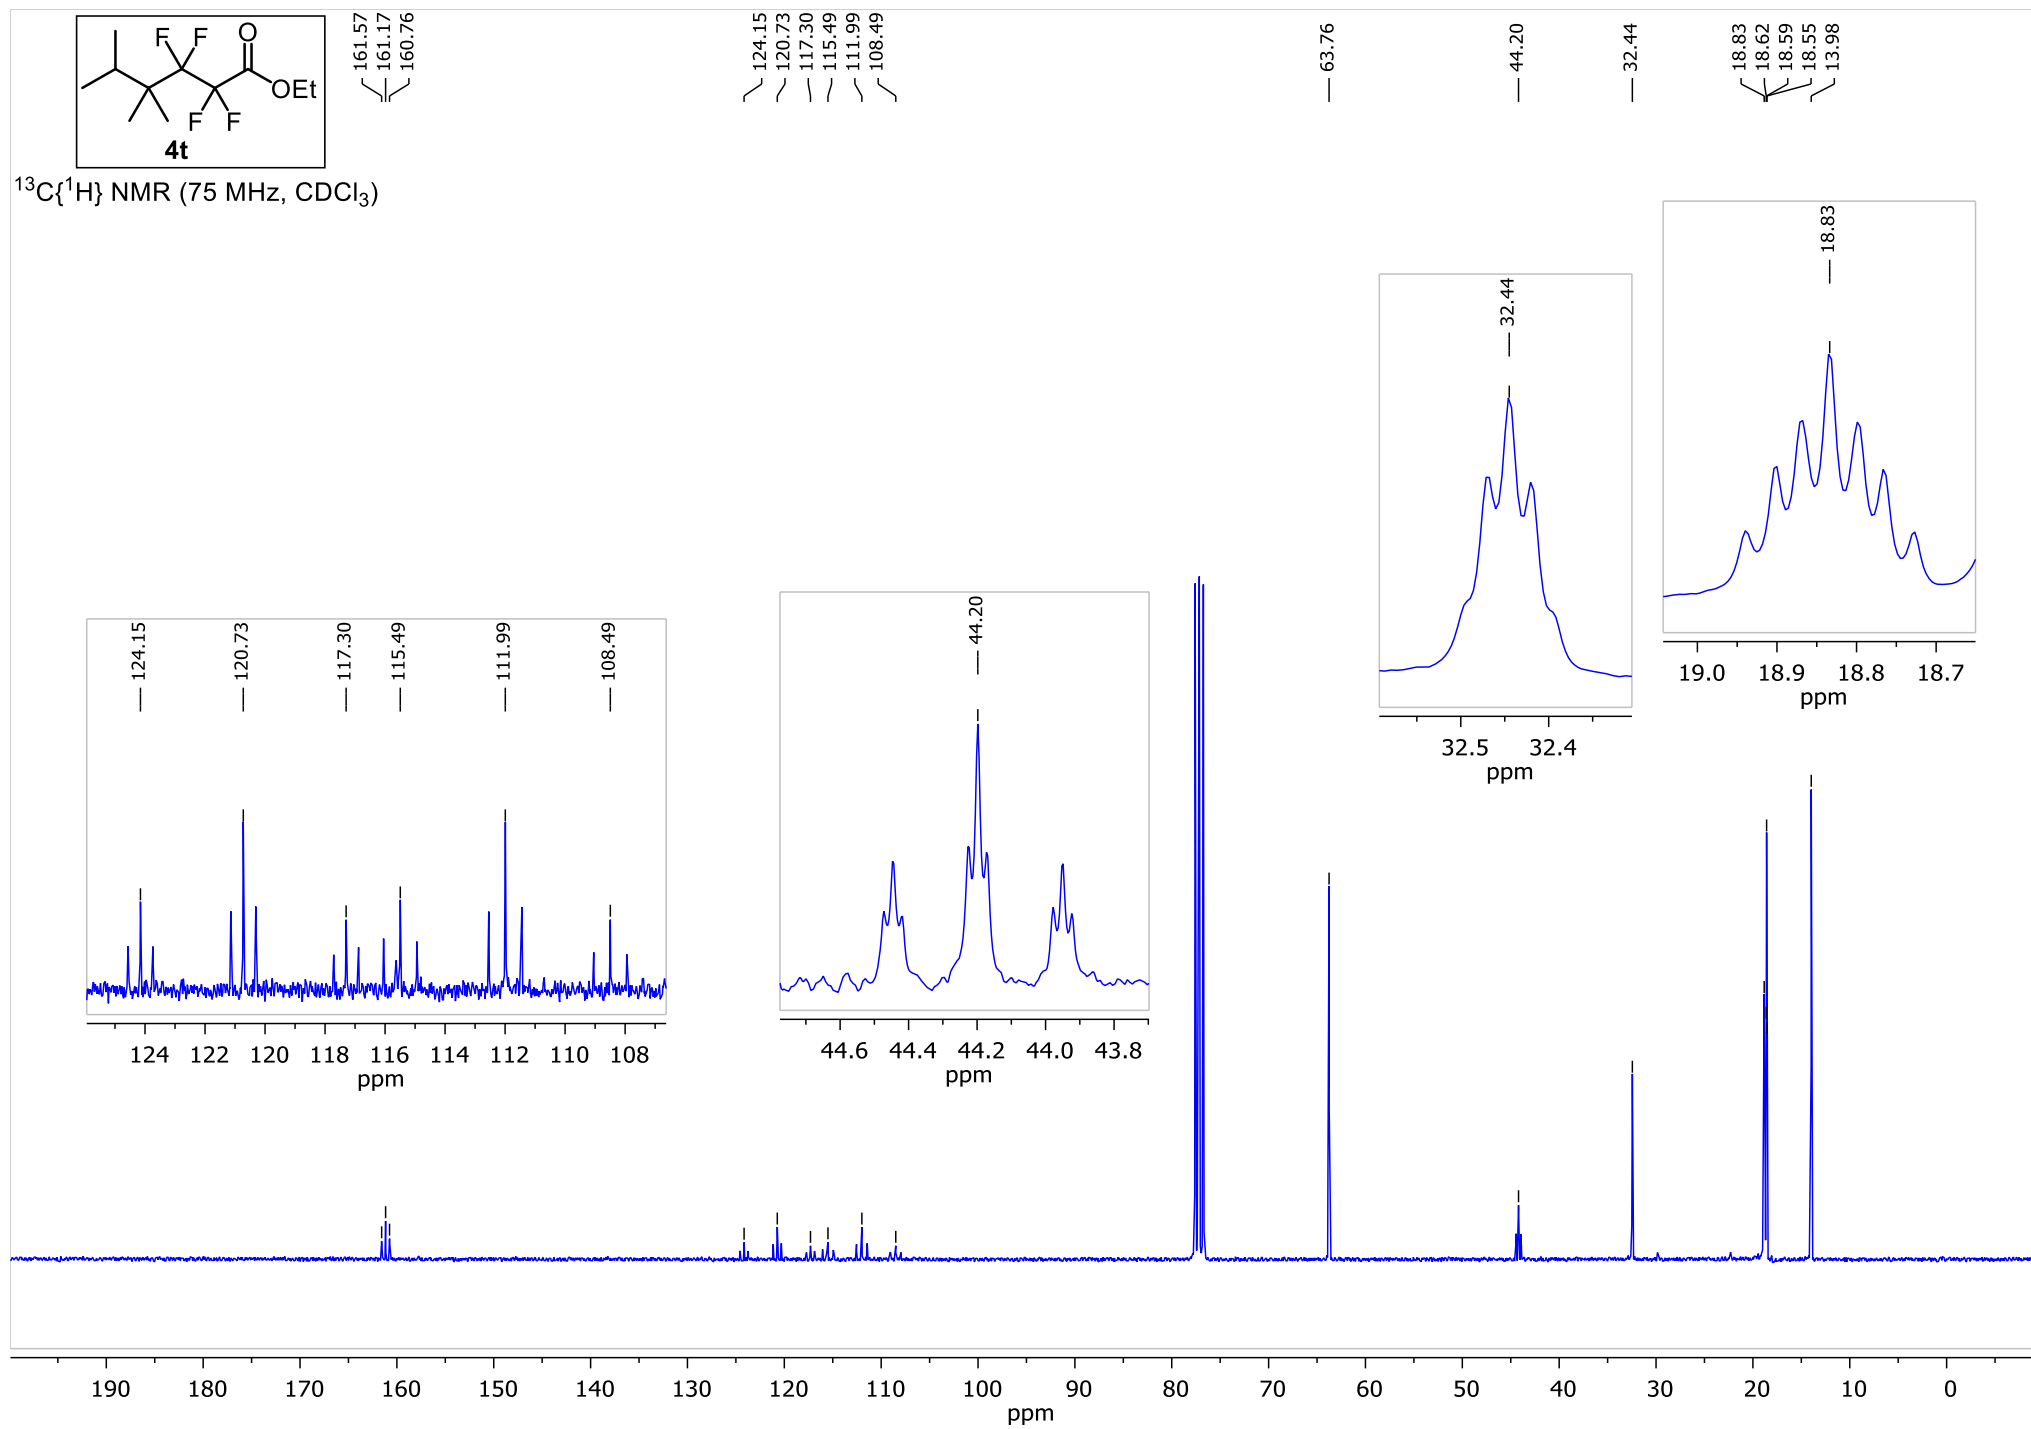

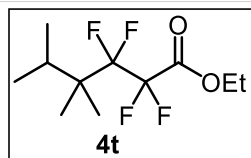

$^{19}\text{F}$  NMR (282 MHz,  $\text{CDCl}_3$ )

-110.33  
-110.33  
-110.34  
-110.35  
-110.36  
-110.36  
-114.61  
-114.63

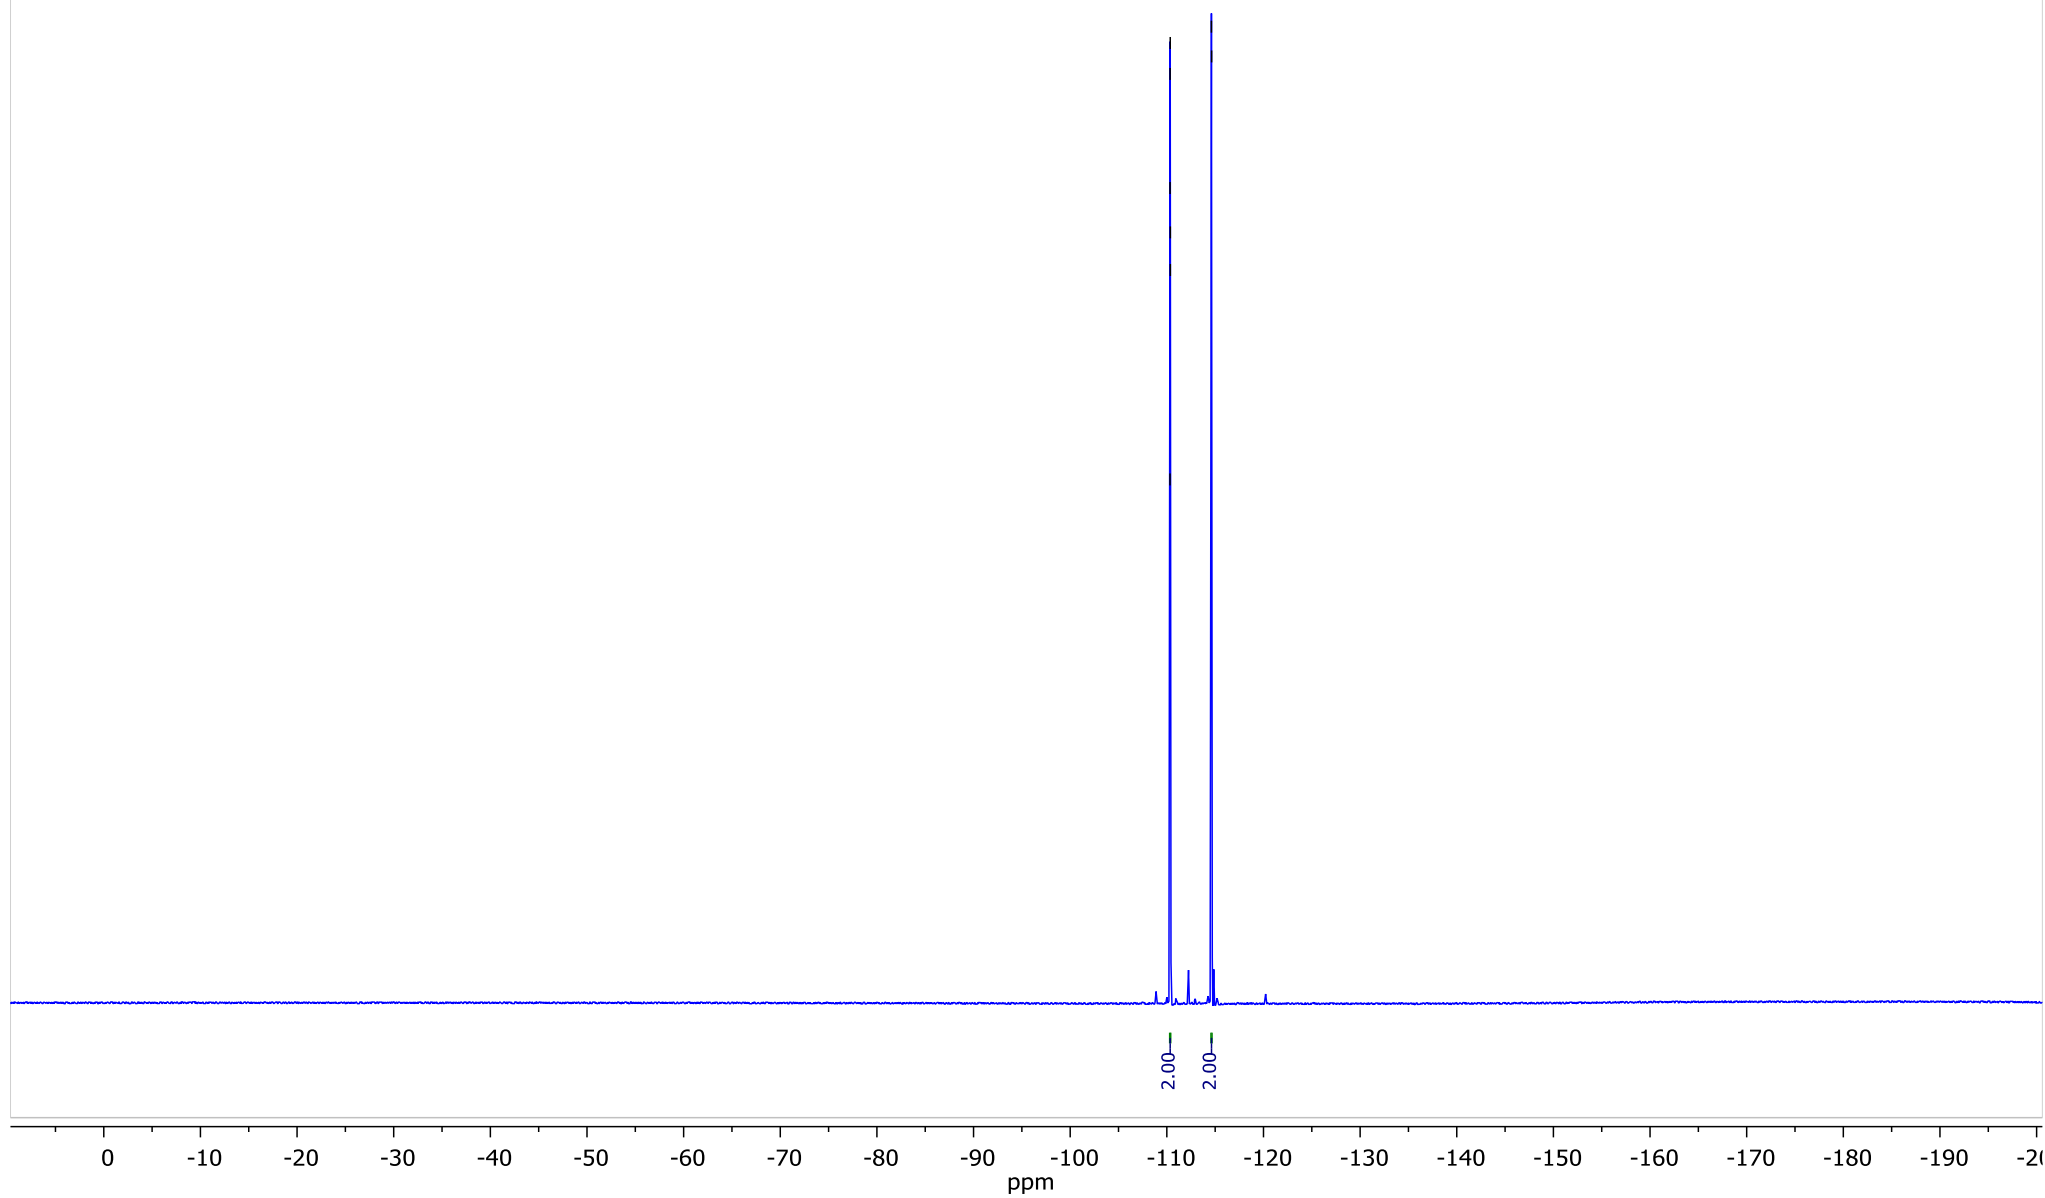

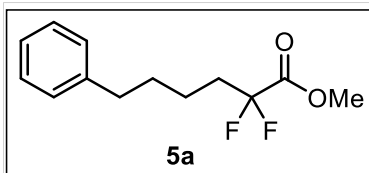

$^1\text{H}$  NMR (300 MHz,  $\text{CDCl}_3$ )

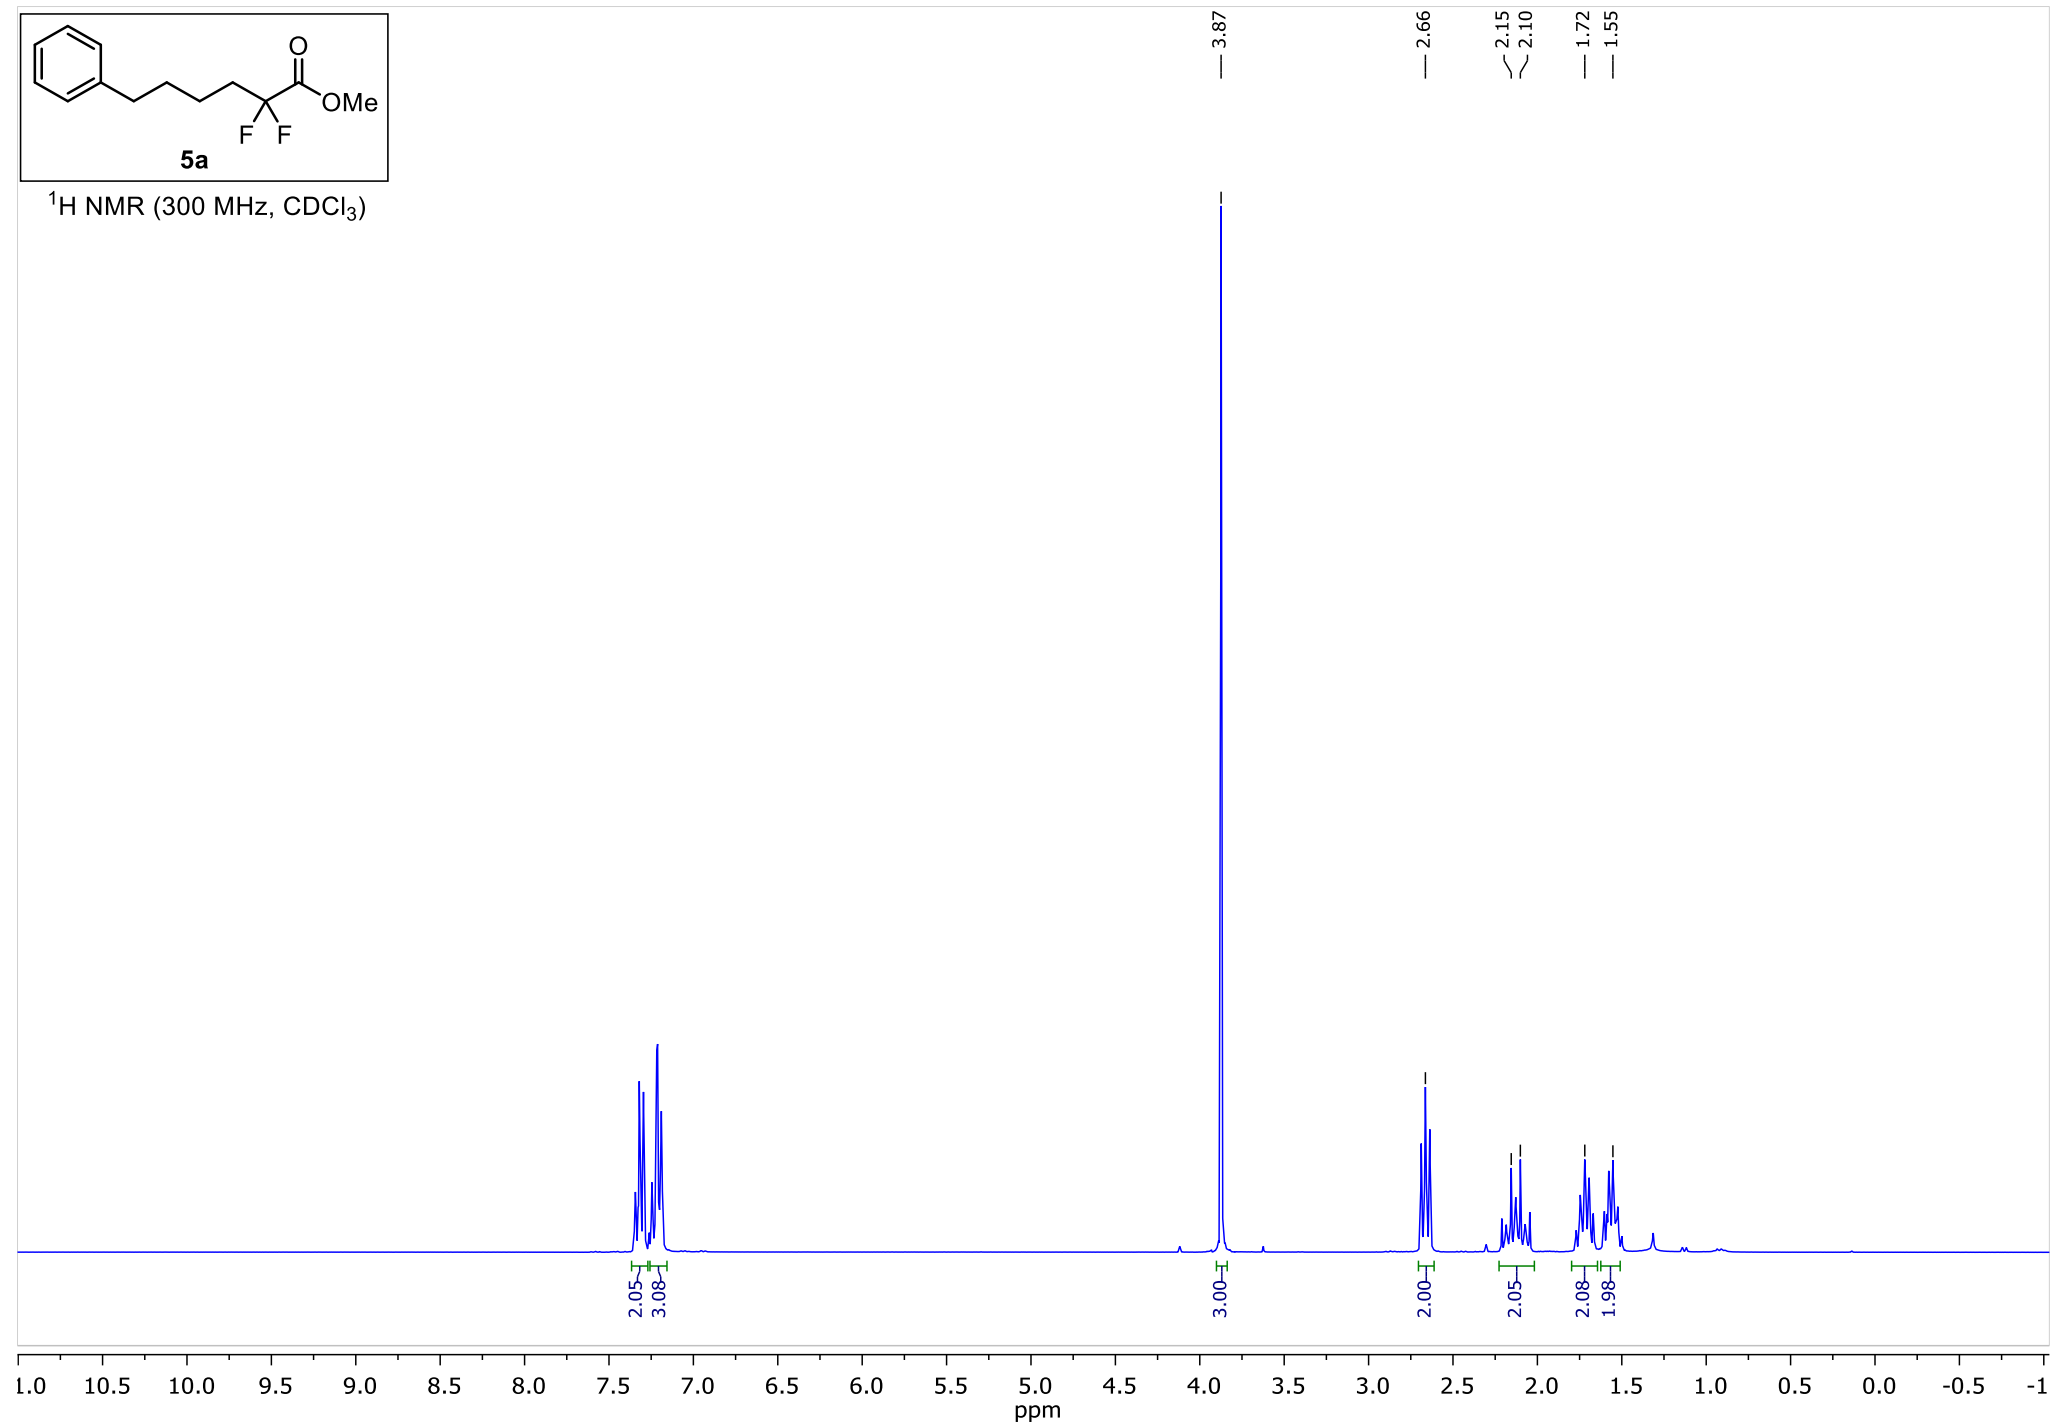



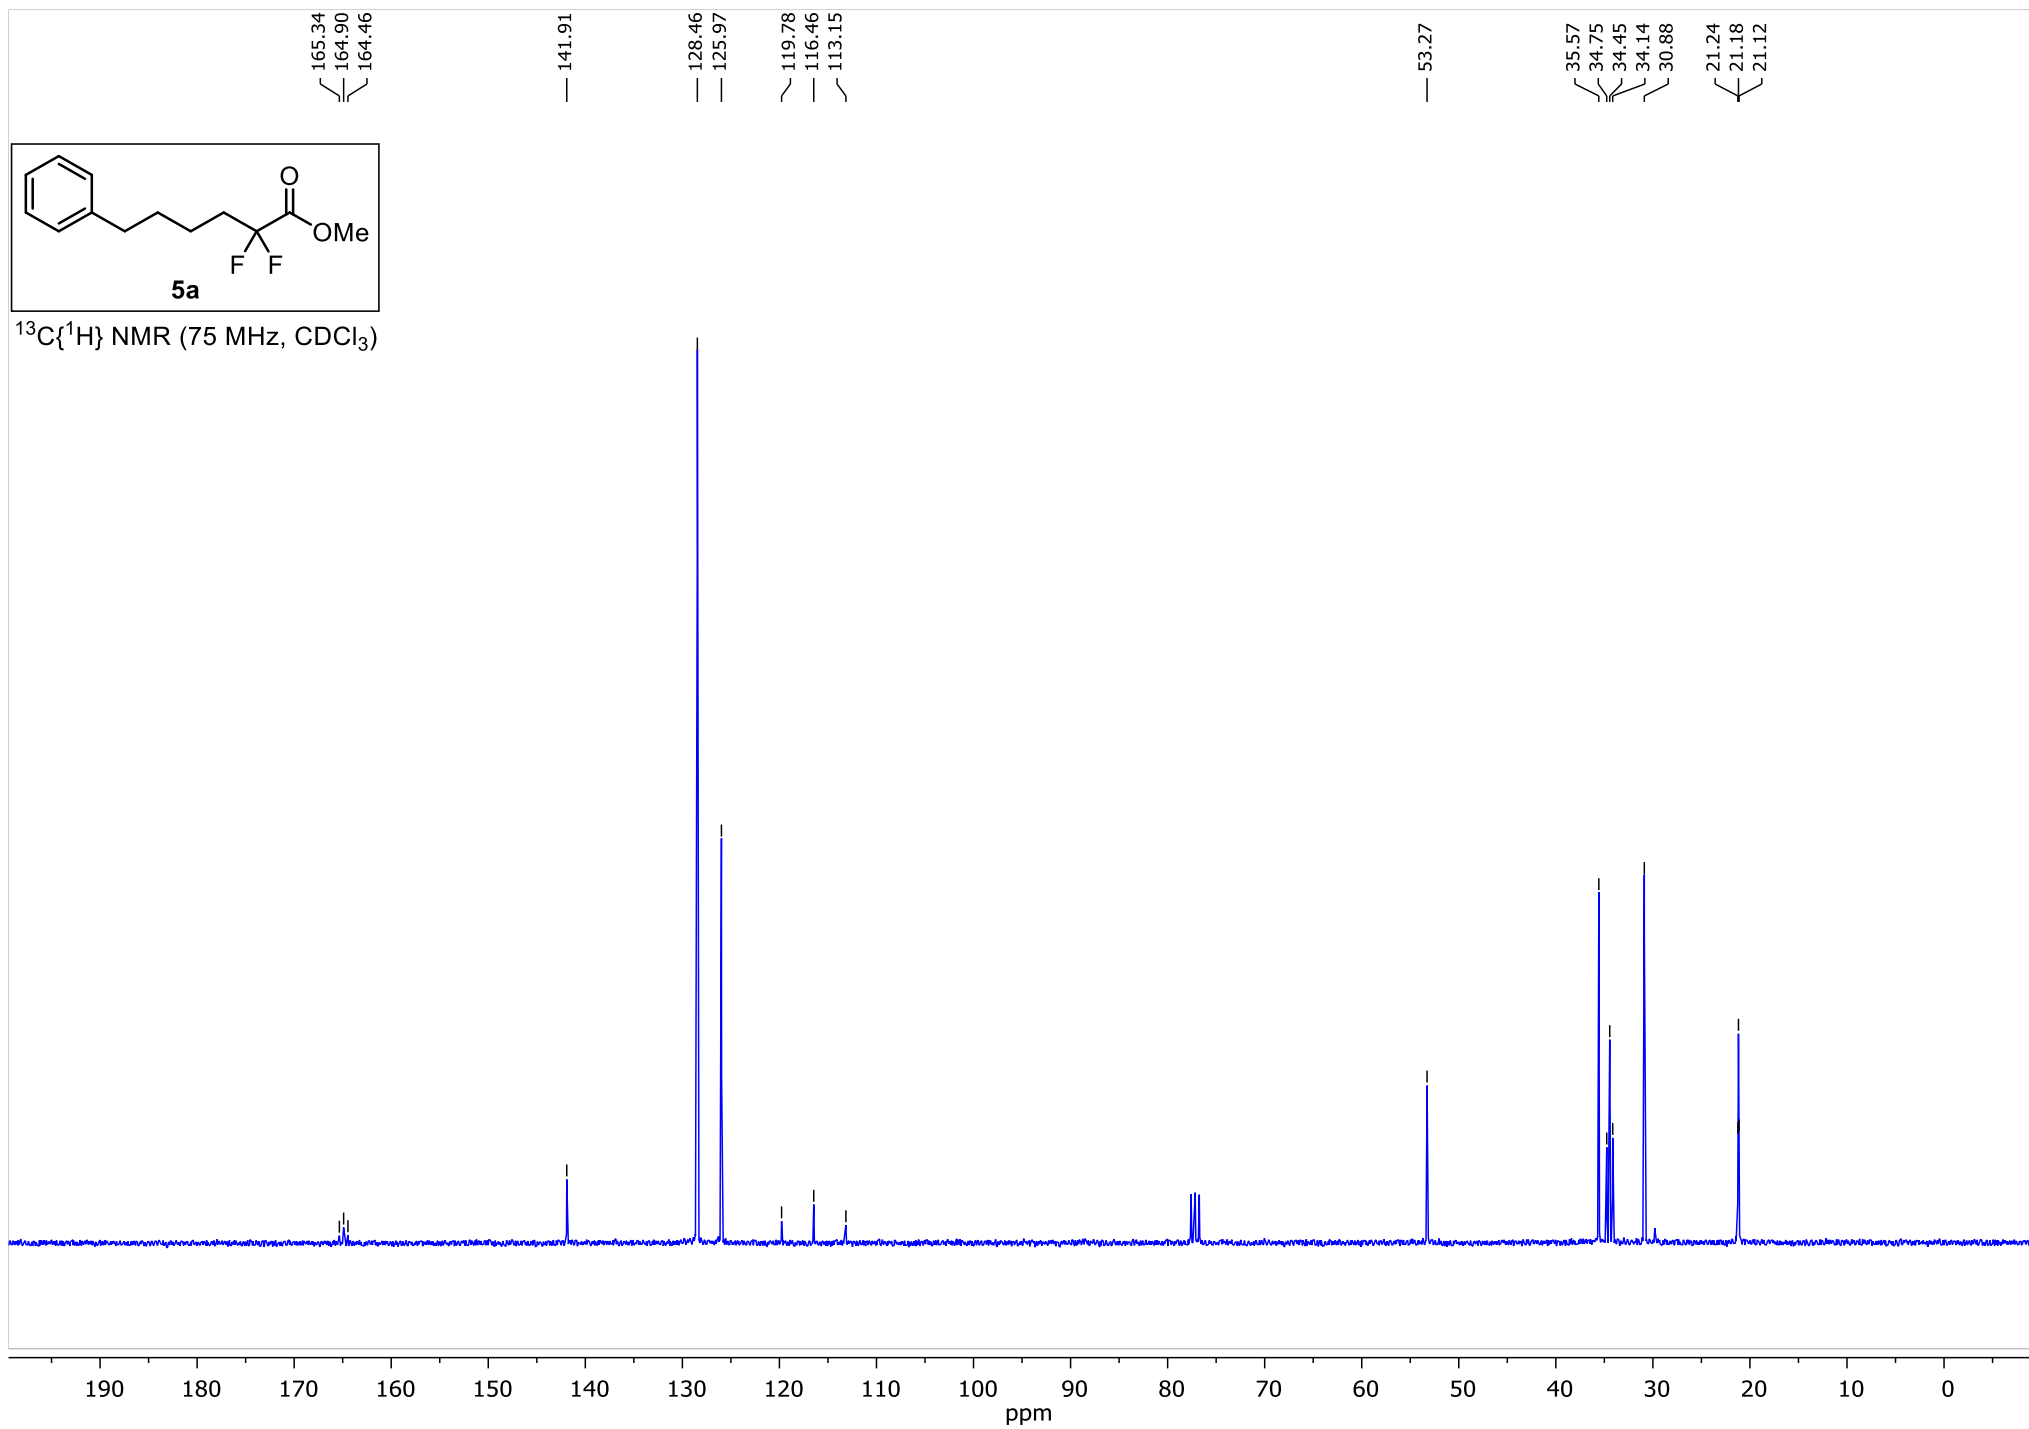

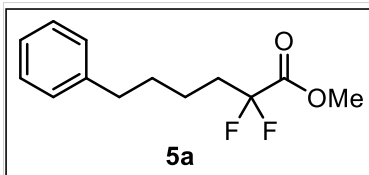

$^{19}\text{F}$  NMR (282 MHz,  $\text{CDCl}_3$ )

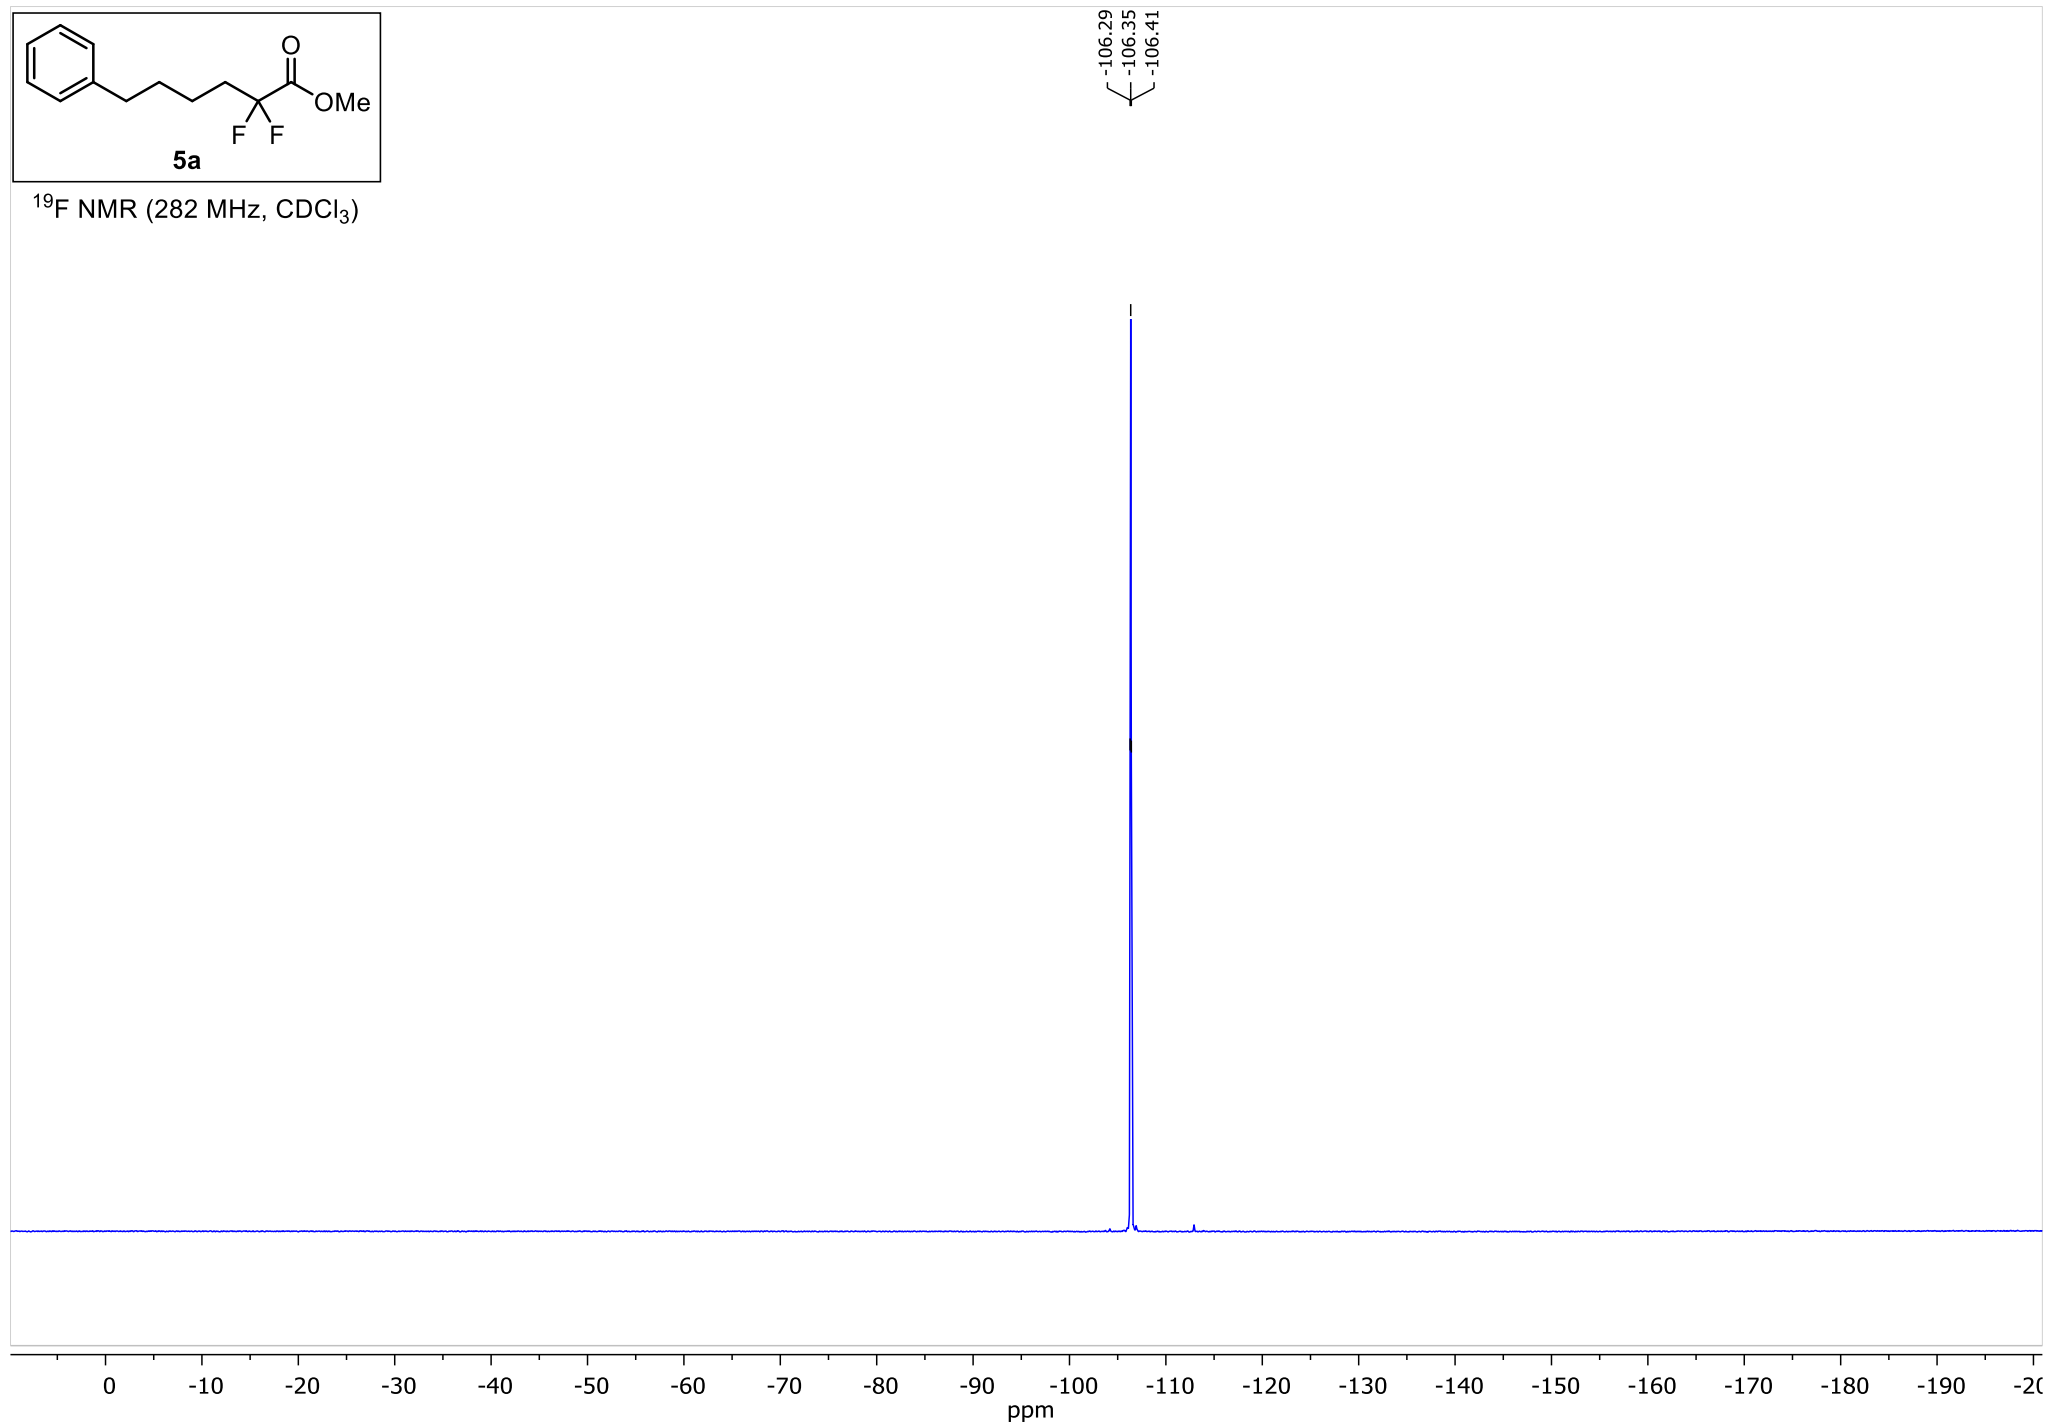

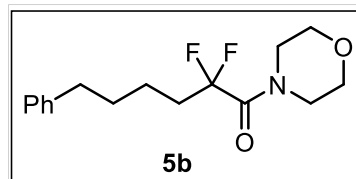

$^1\text{H}$  NMR (300 MHz,  $\text{CDCl}_3$ )

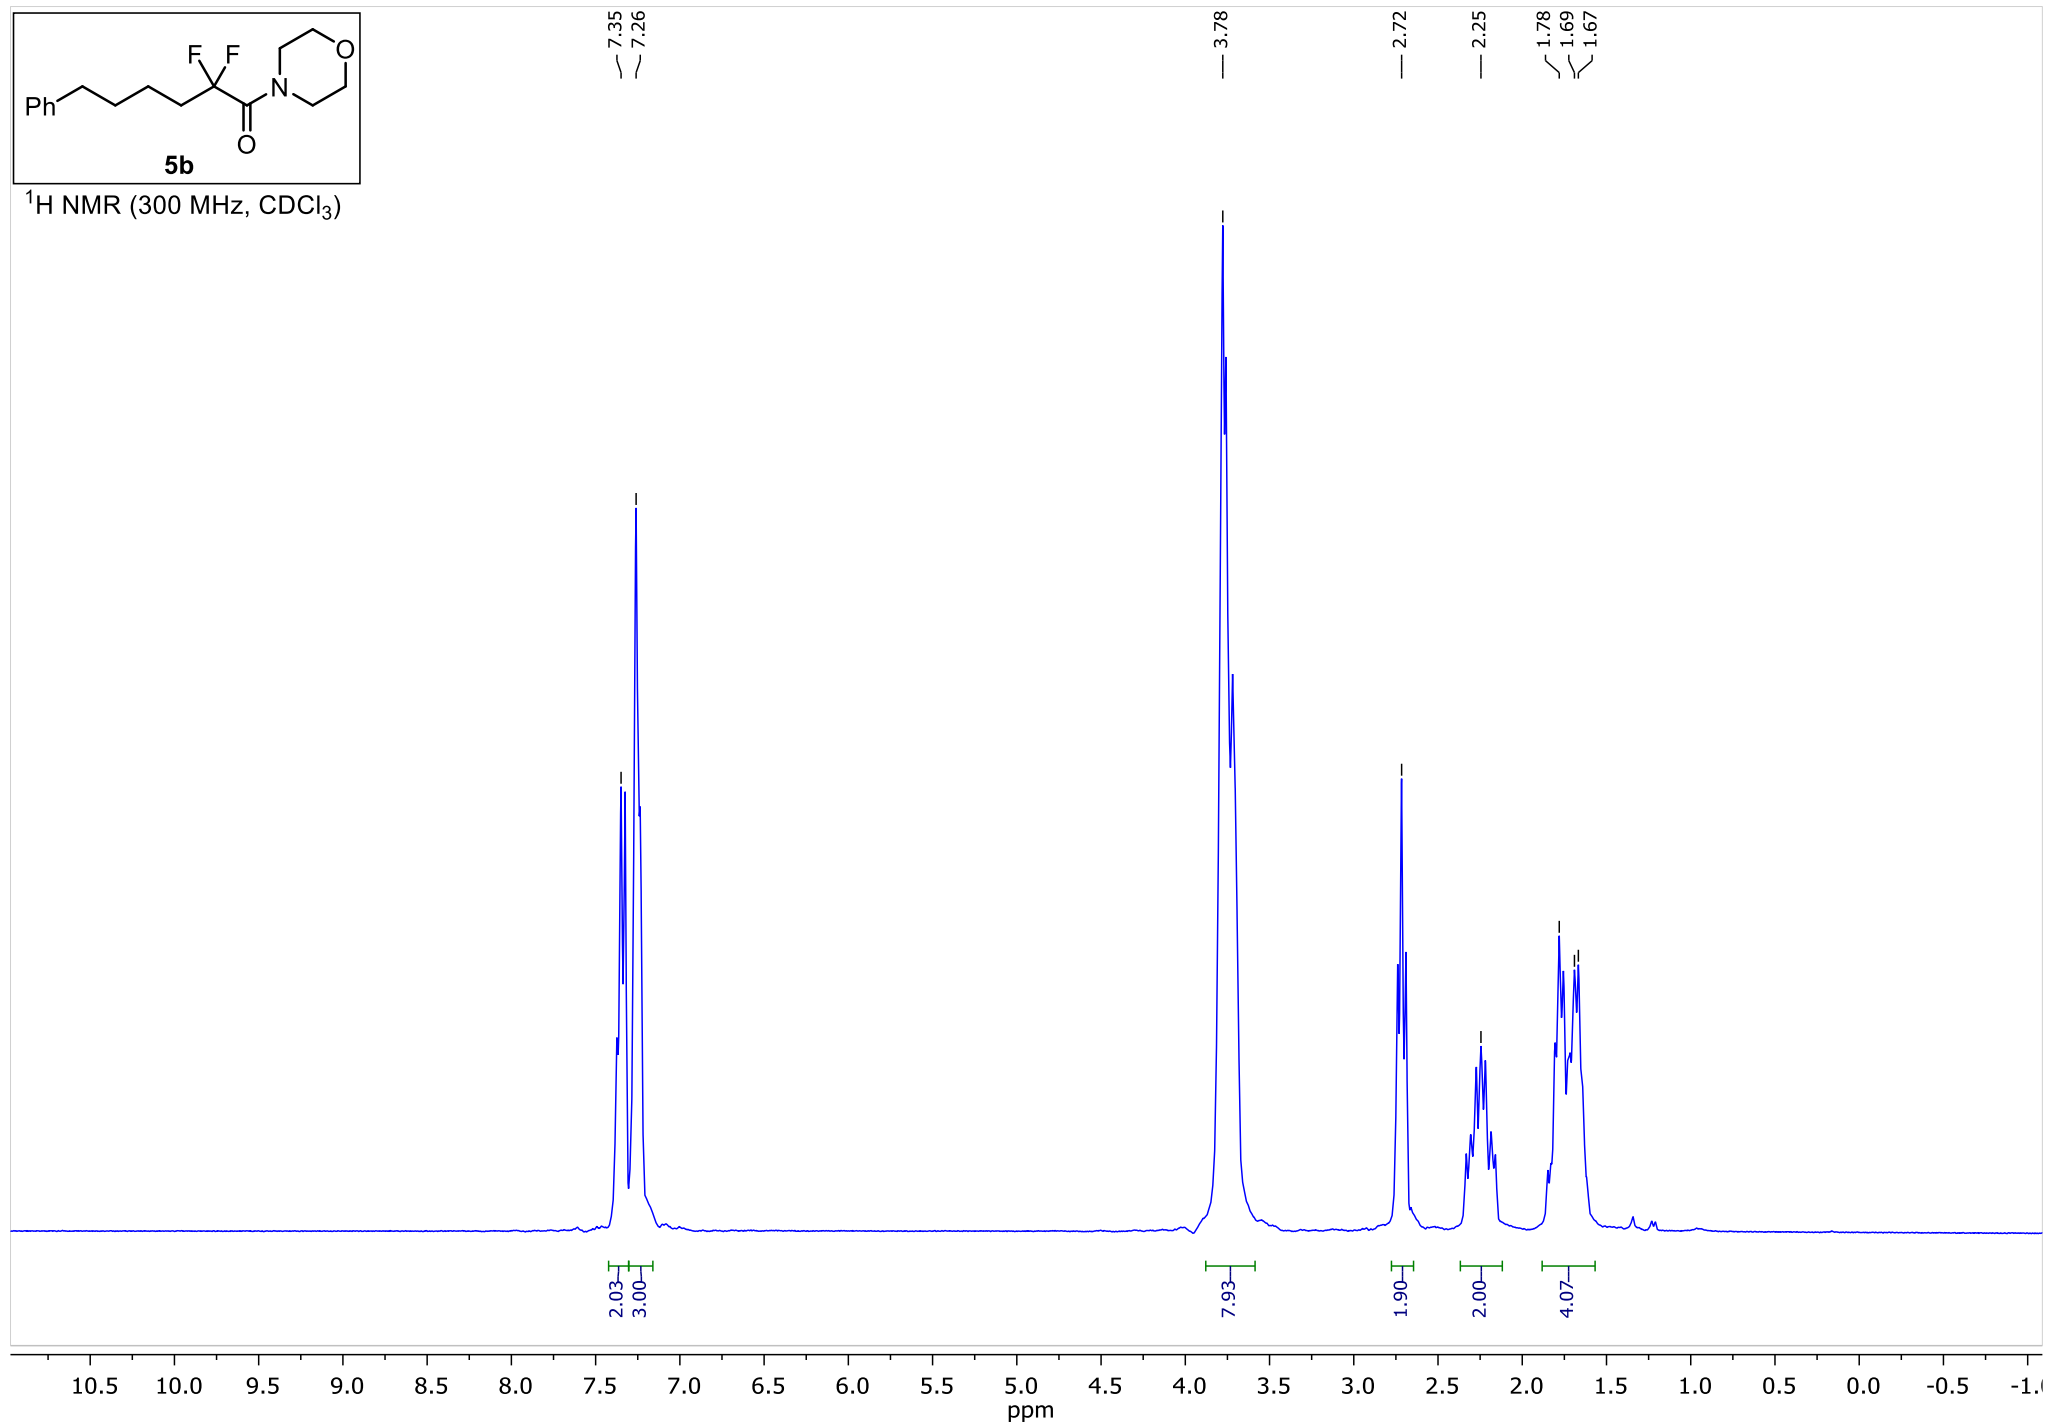

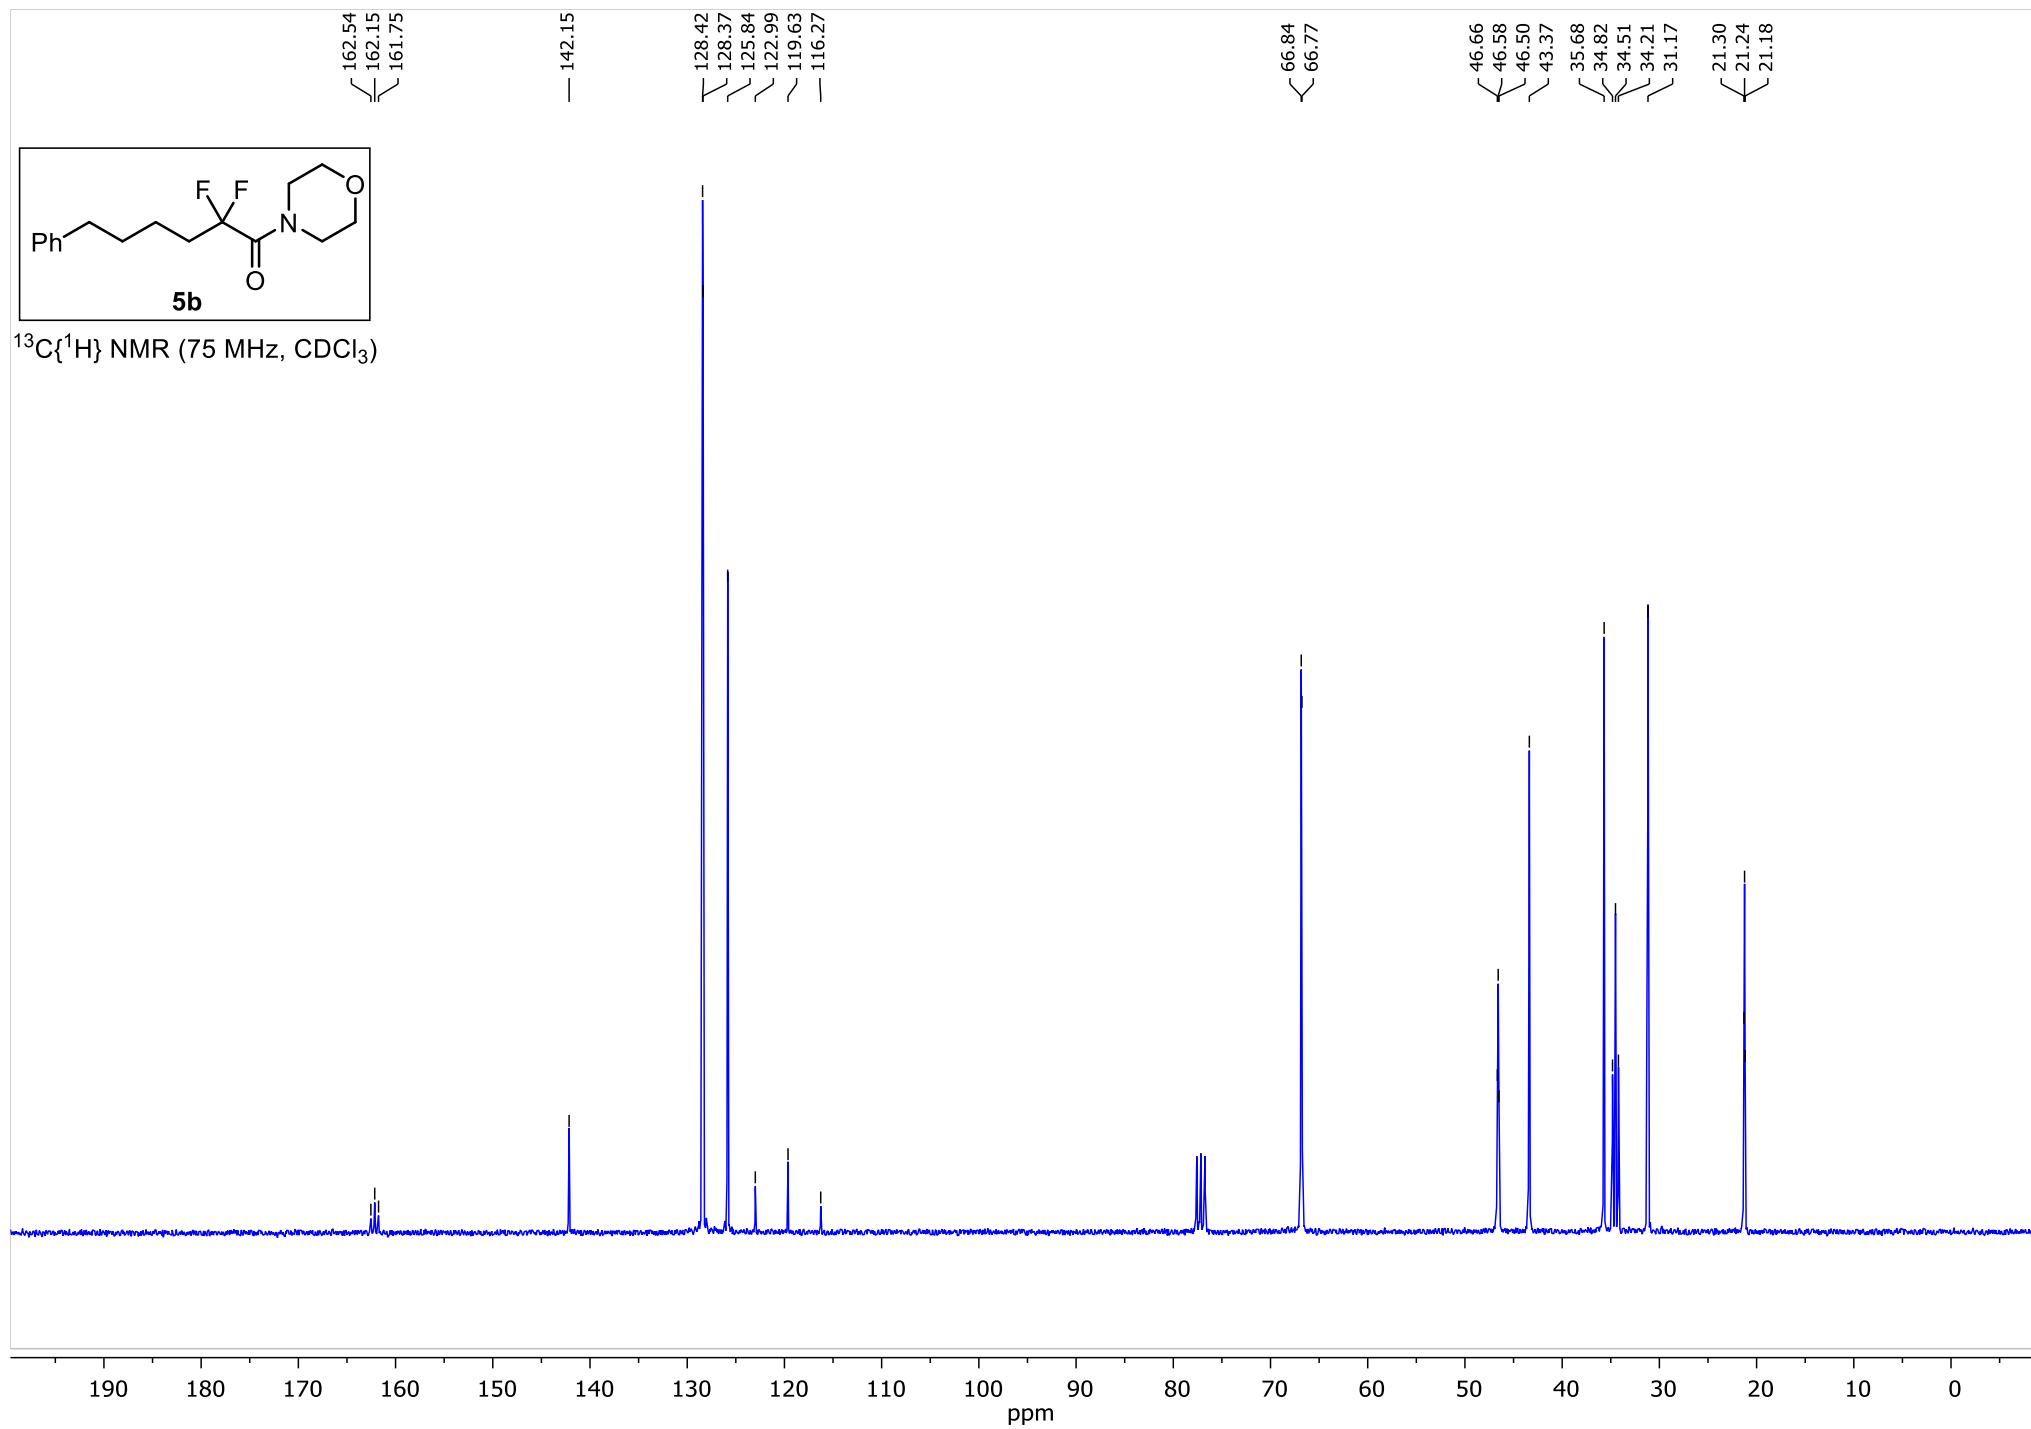

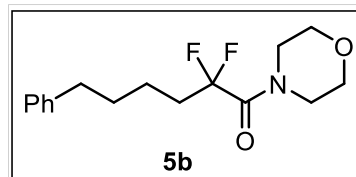

$^{19}\text{F}$  NMR (282 MHz,  $\text{CDCl}_3$ )

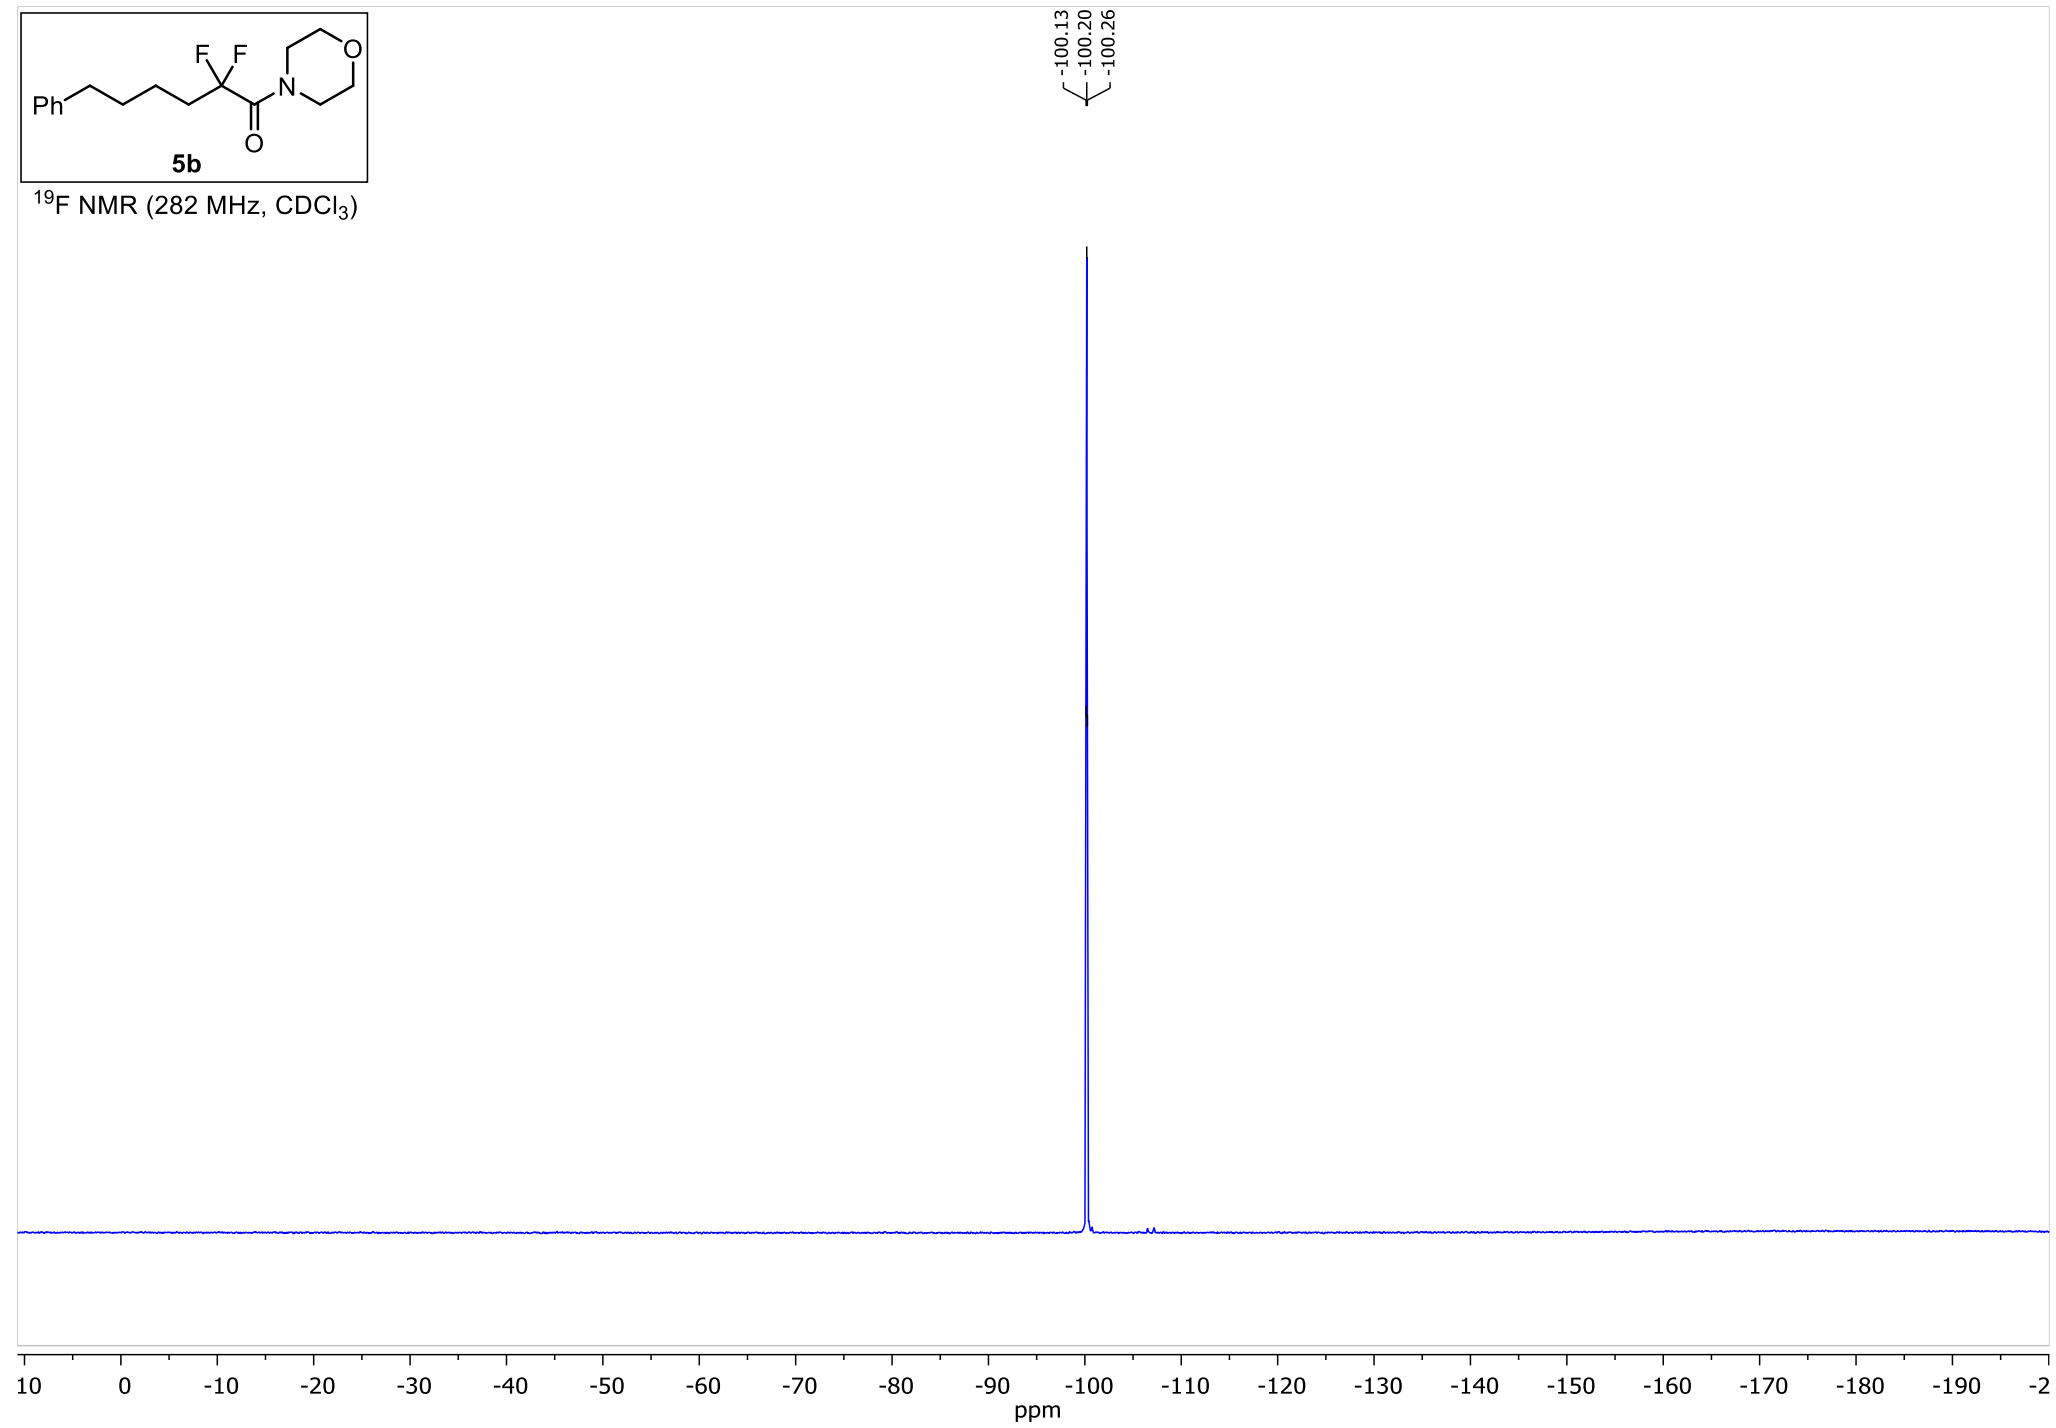

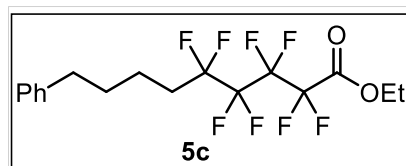

$^1\text{H NMR}$  (300 MHz,  $\text{CDCl}_3$ )

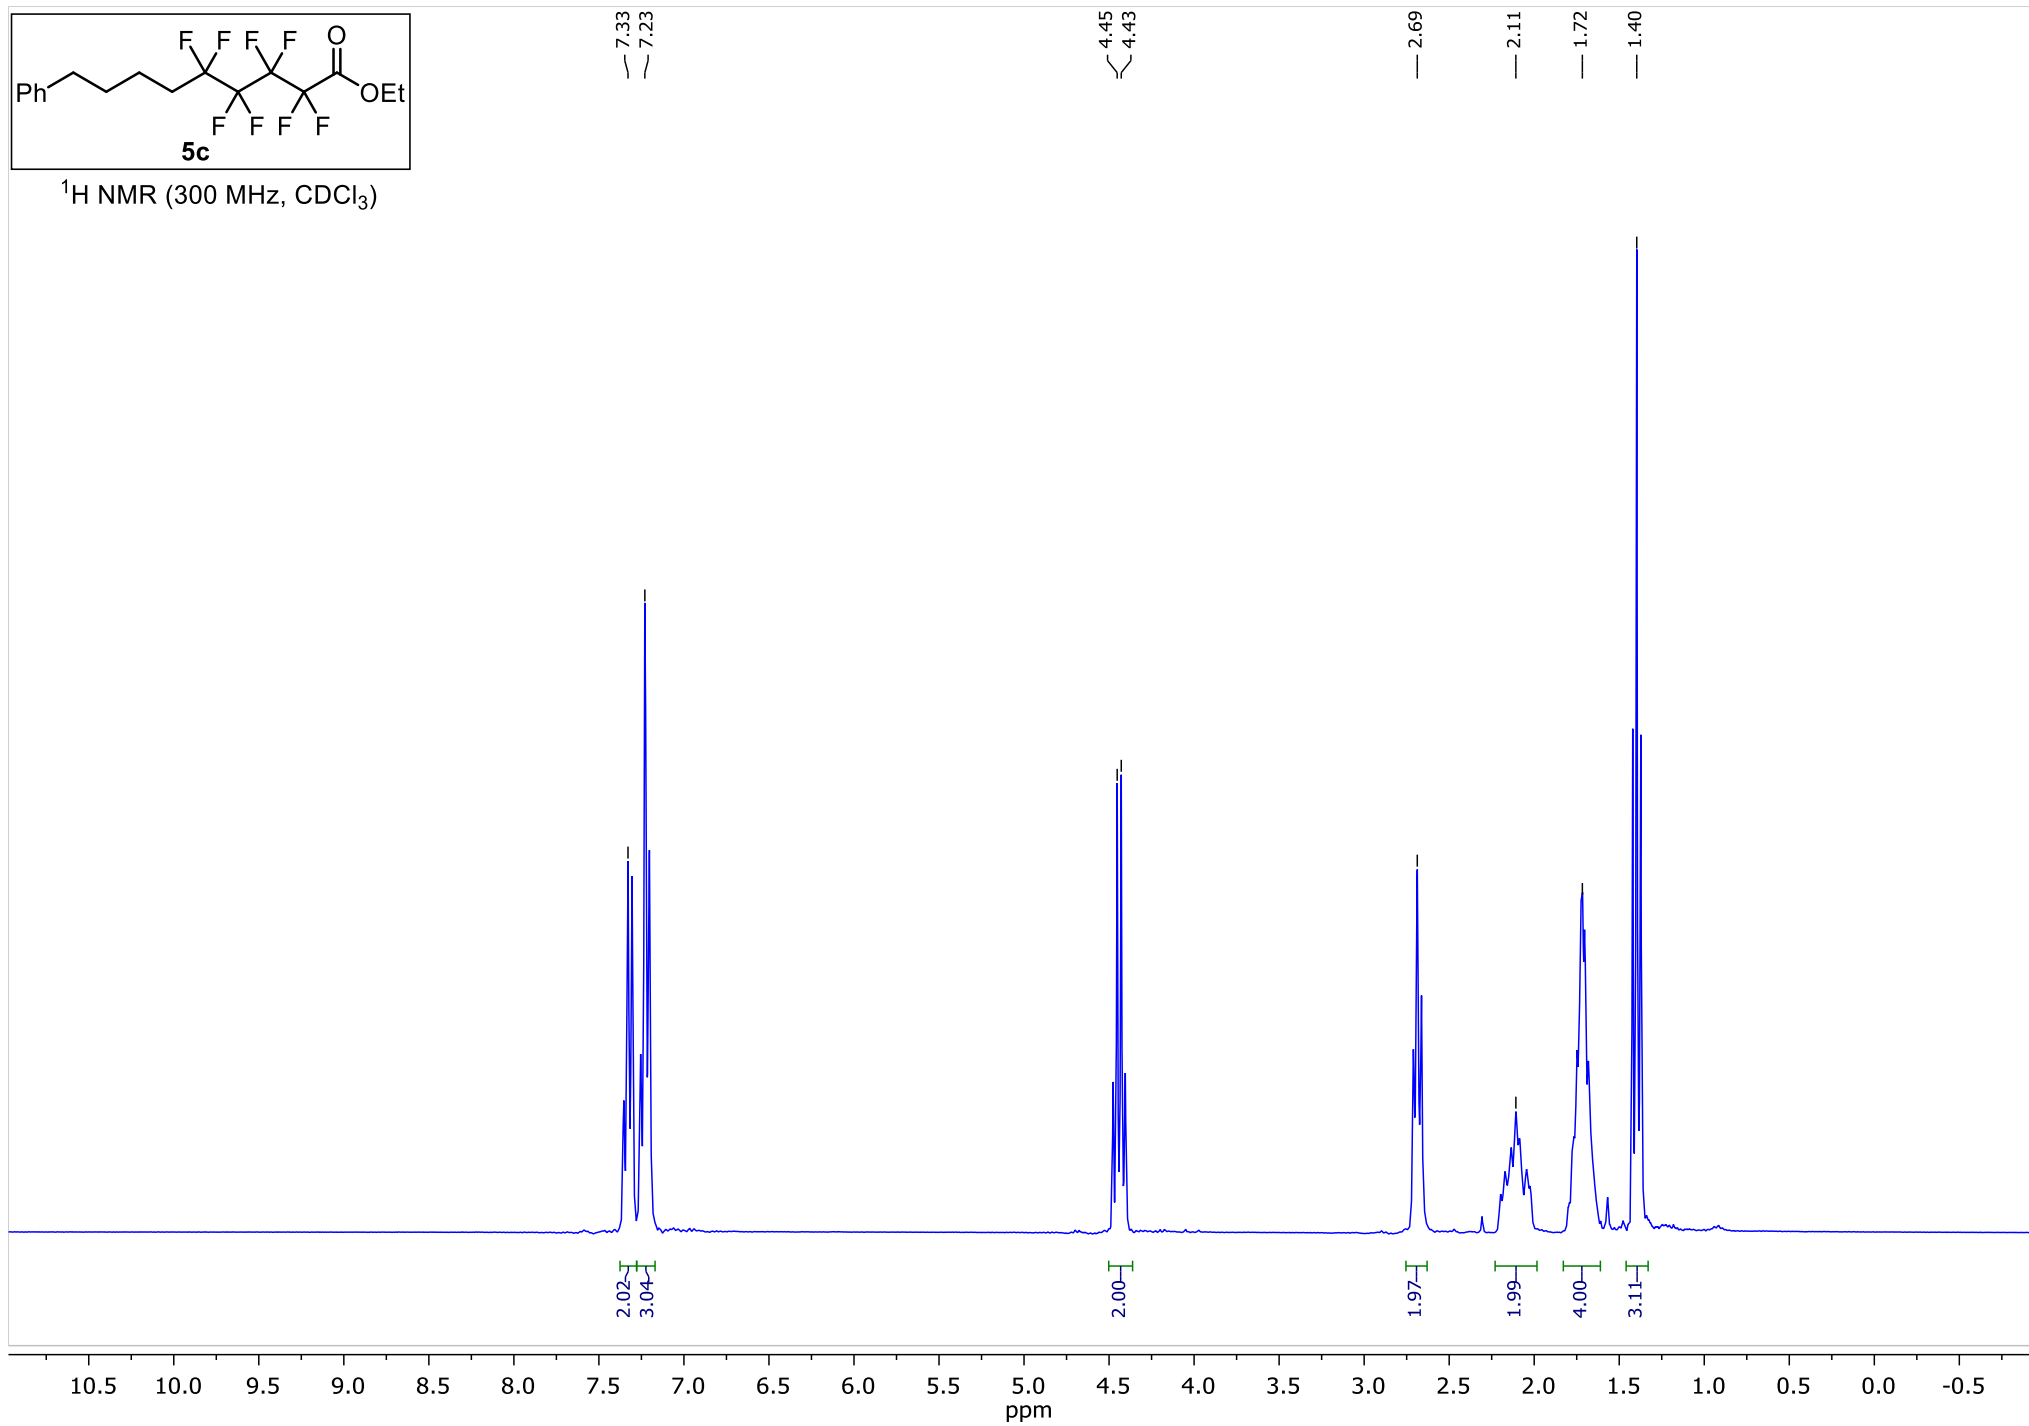

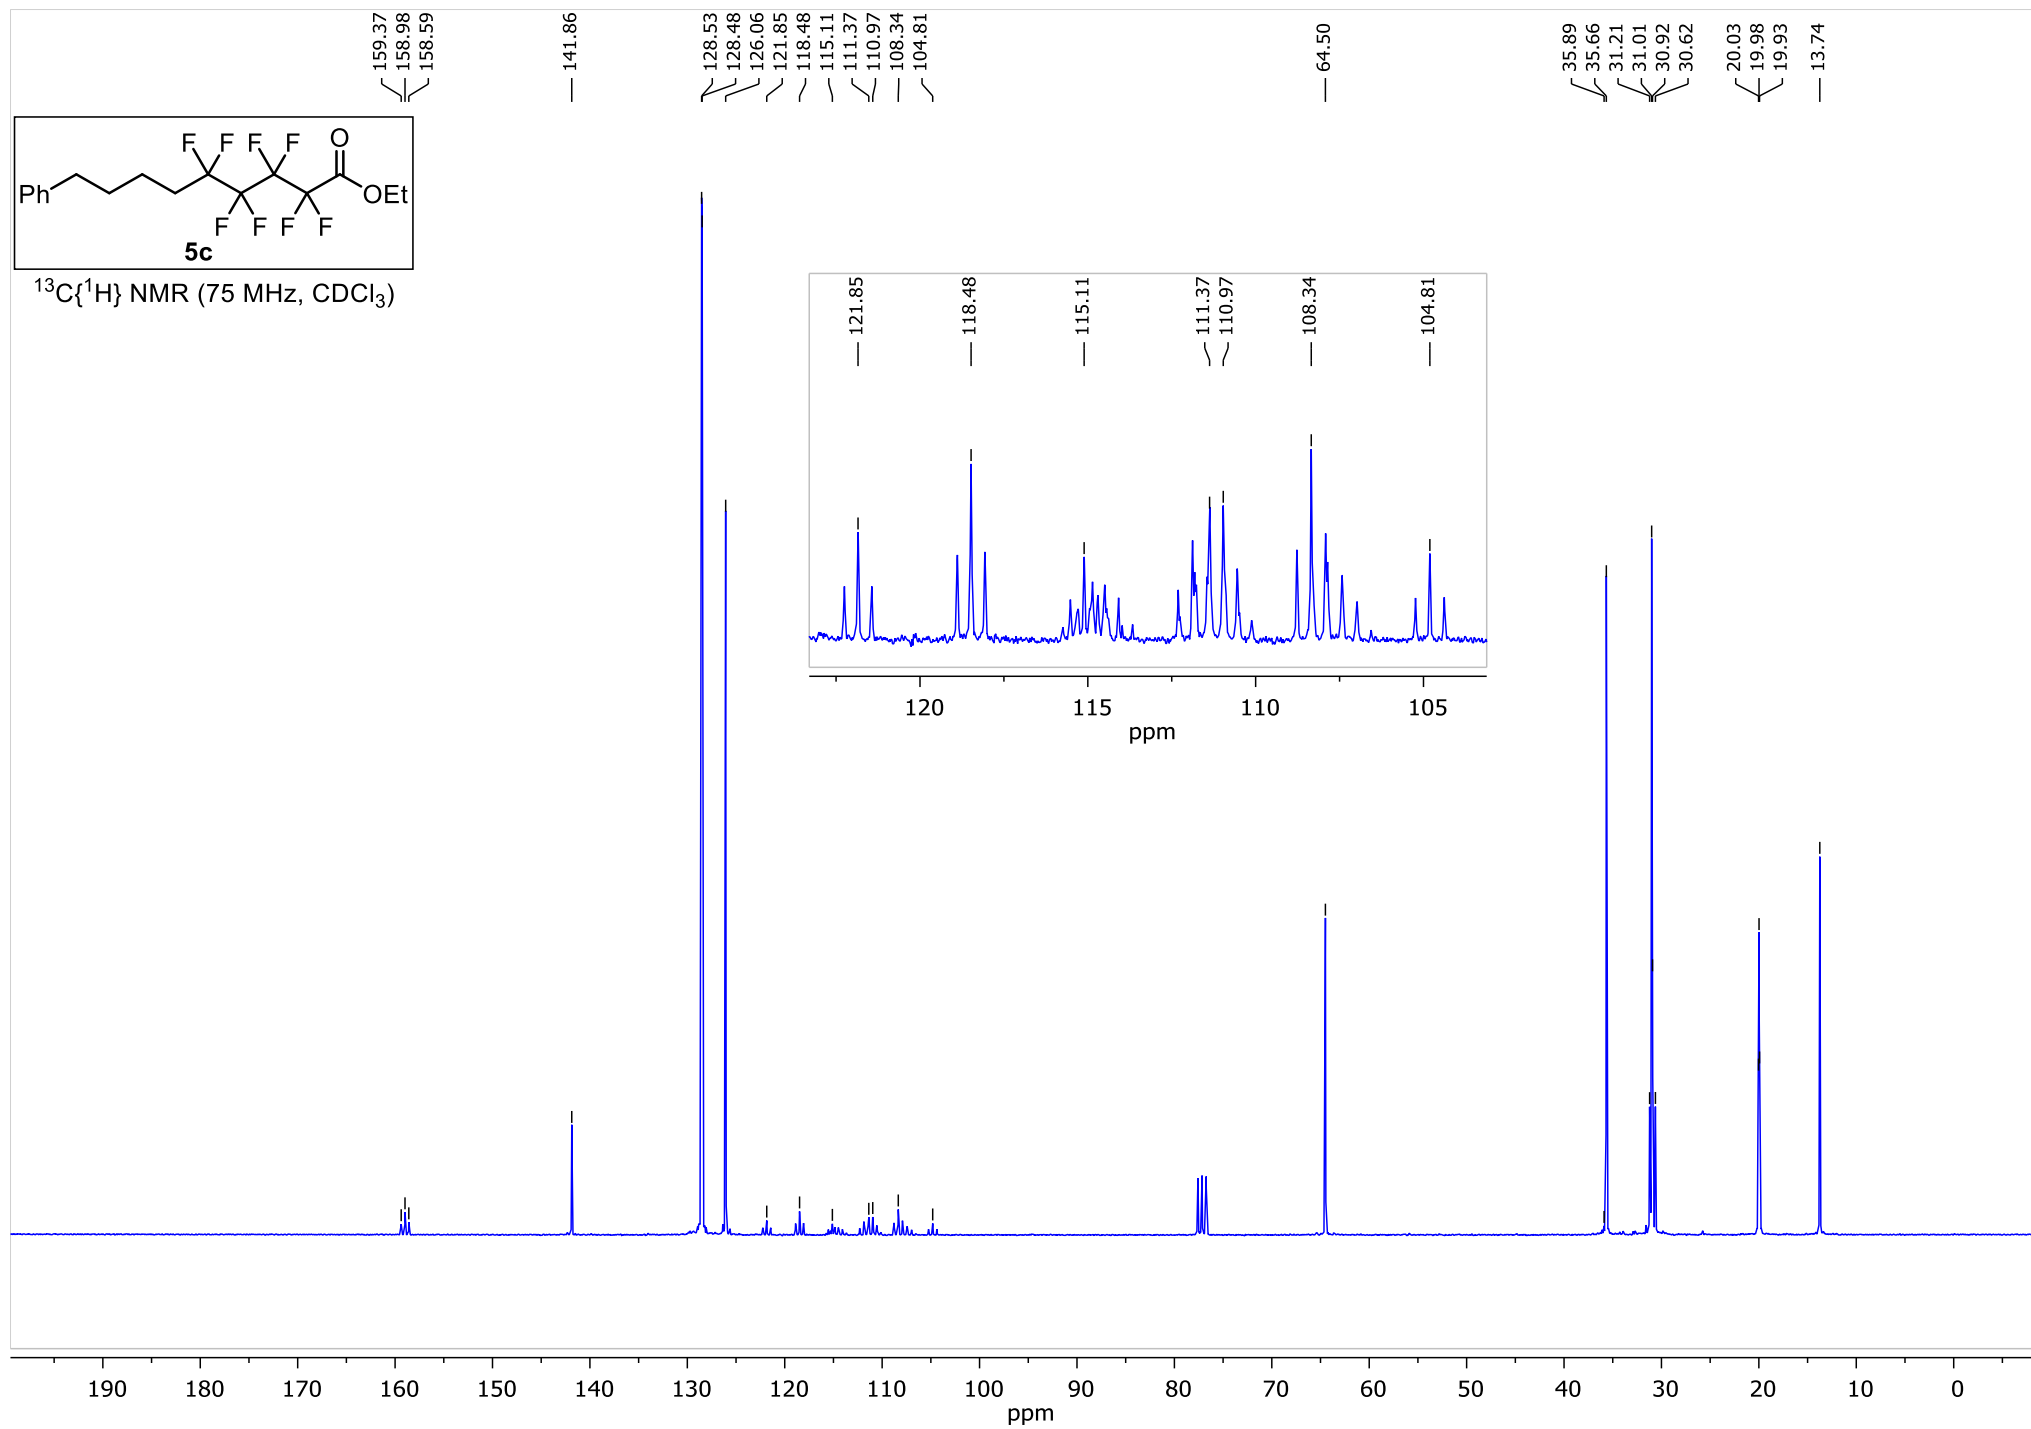

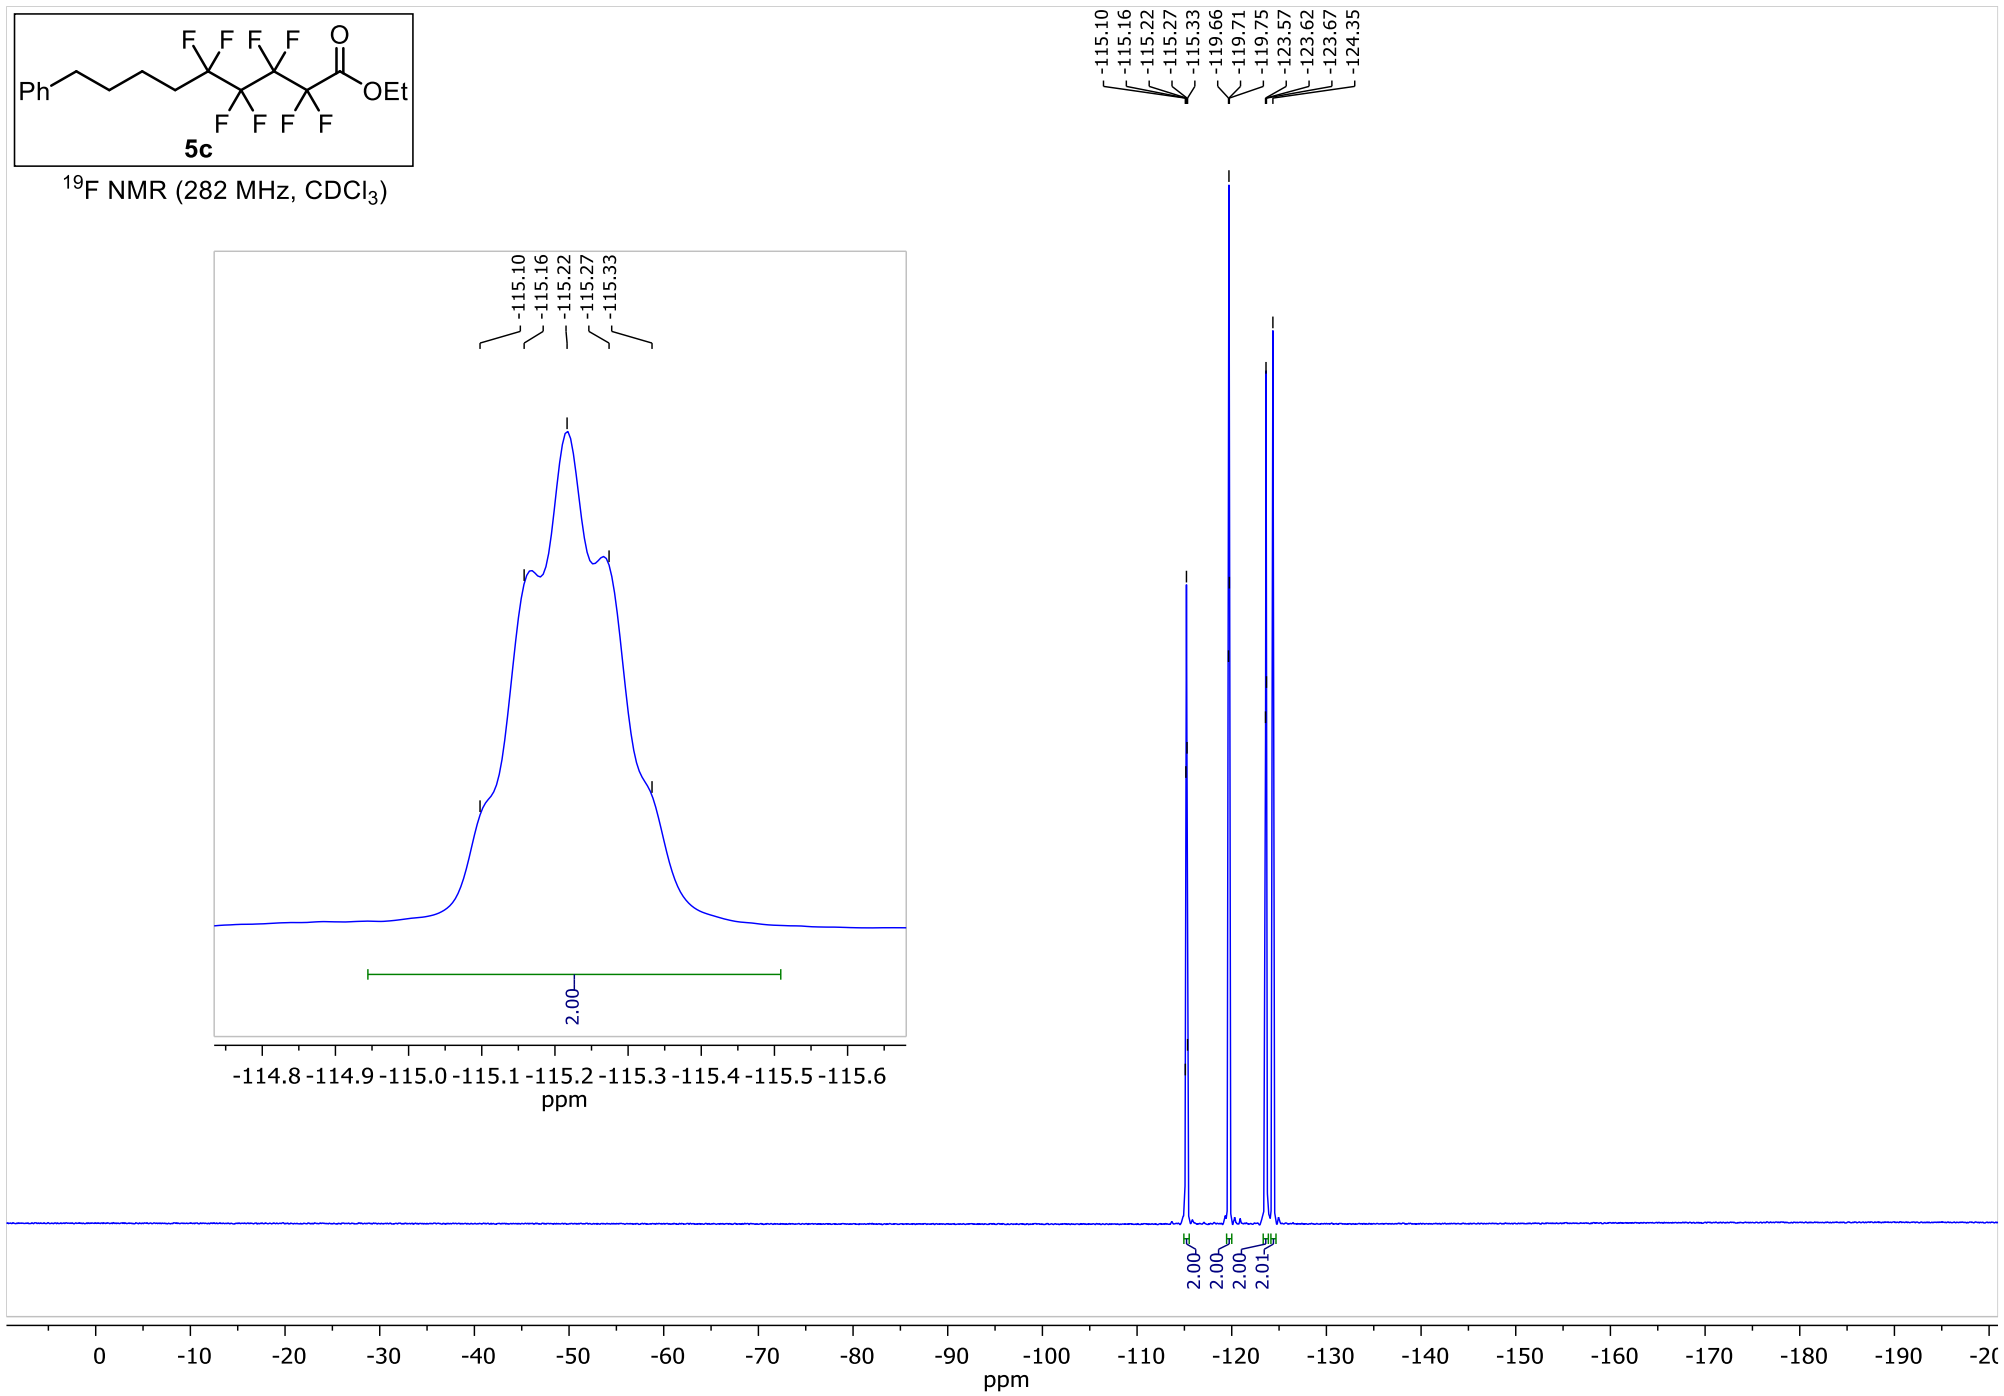



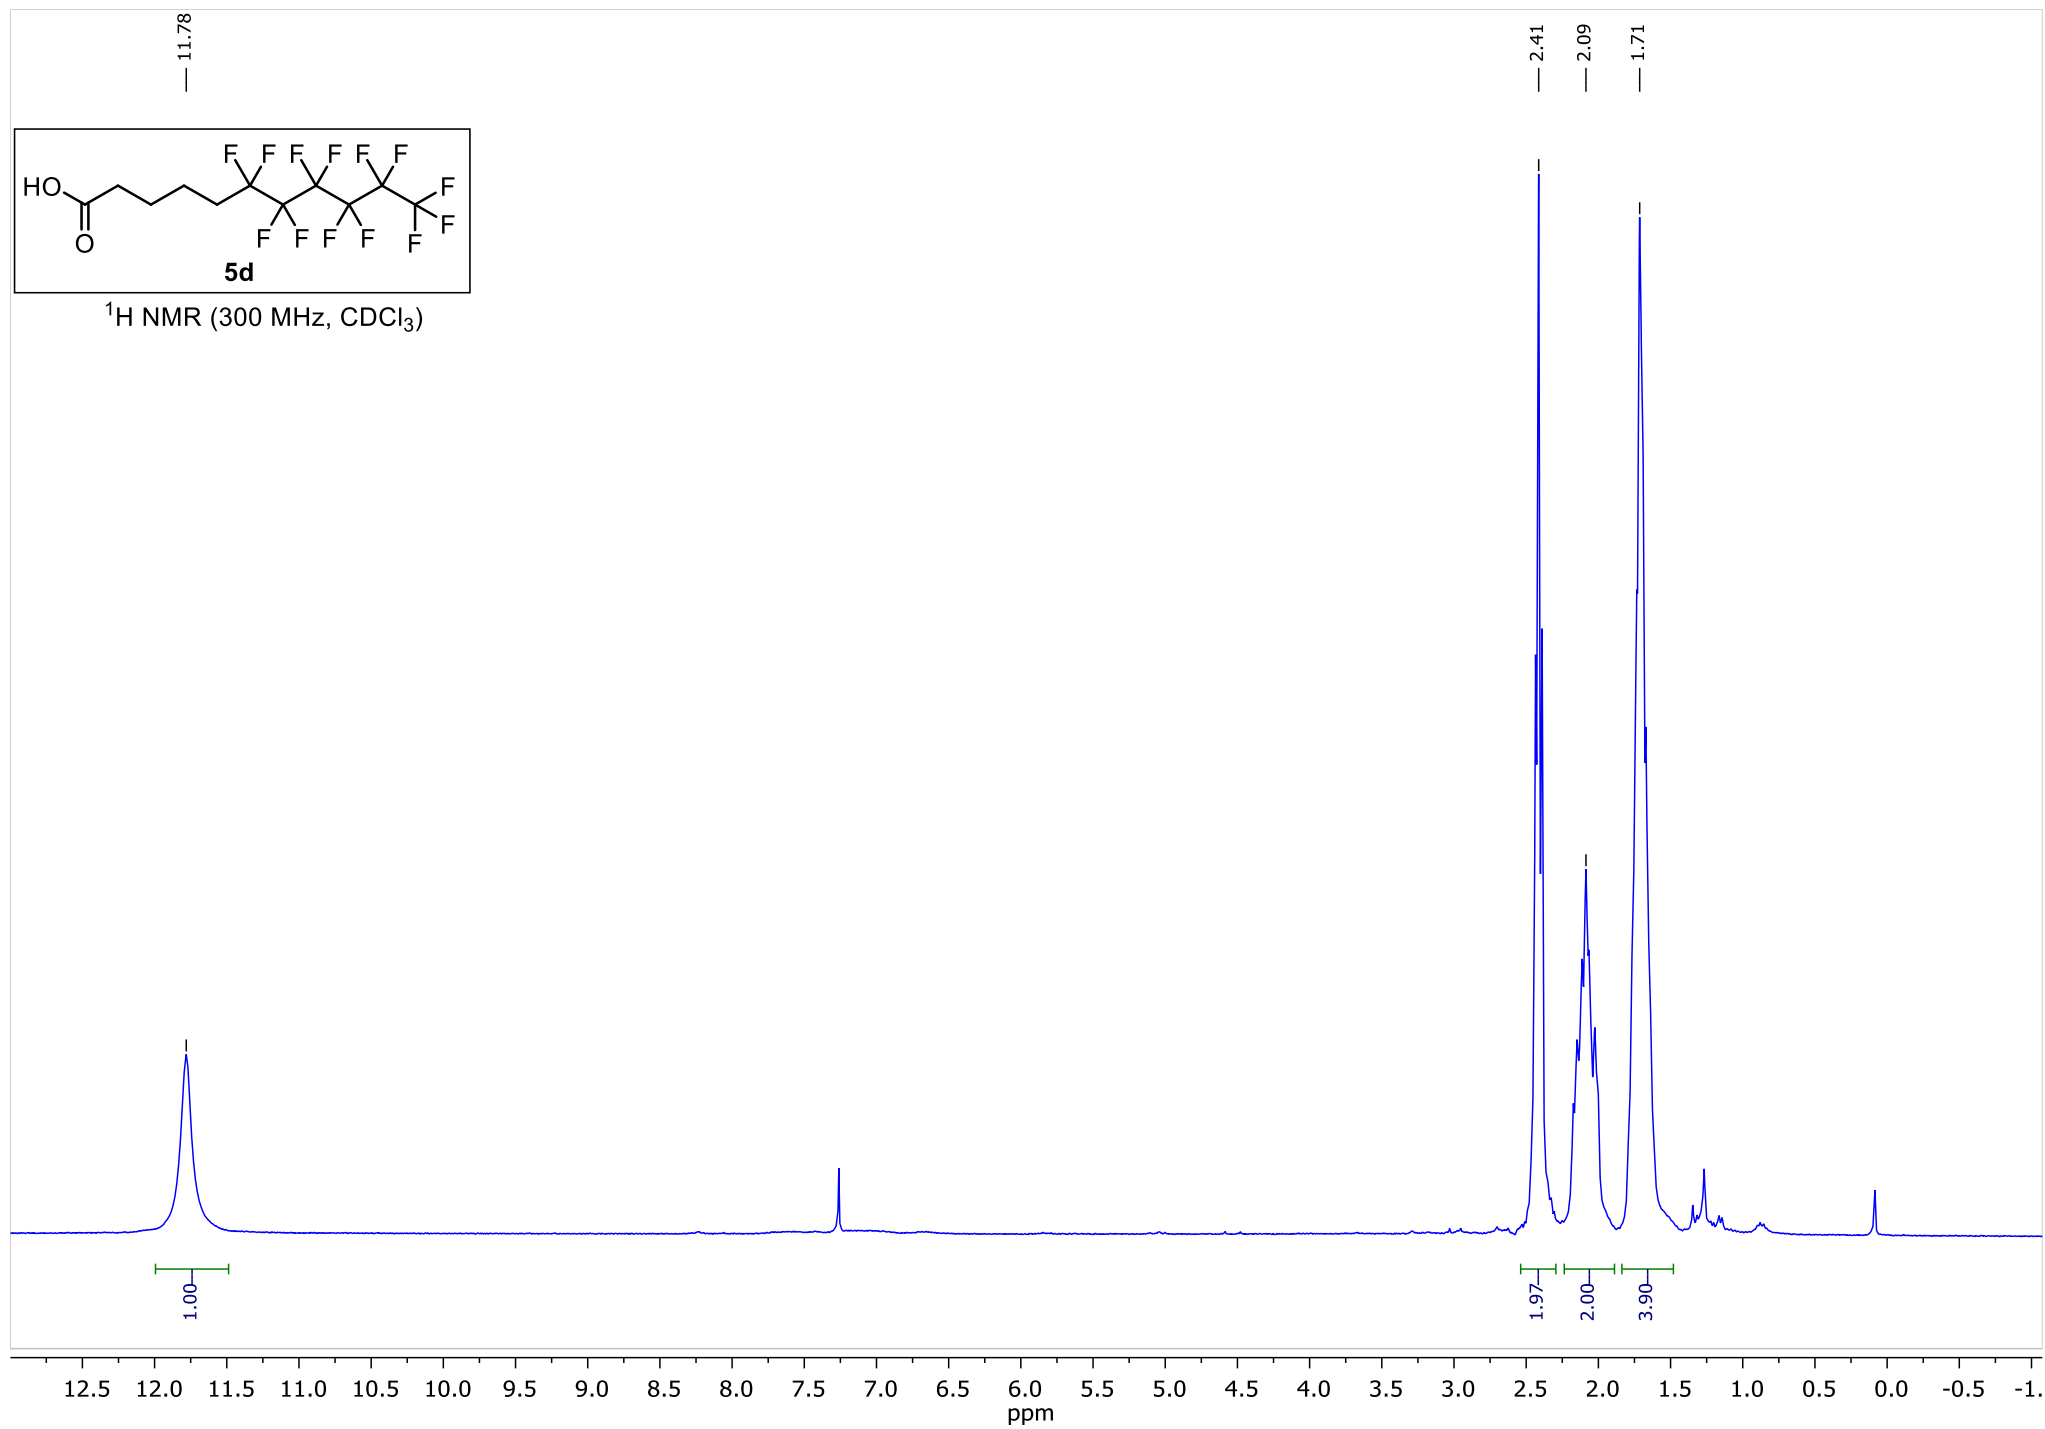

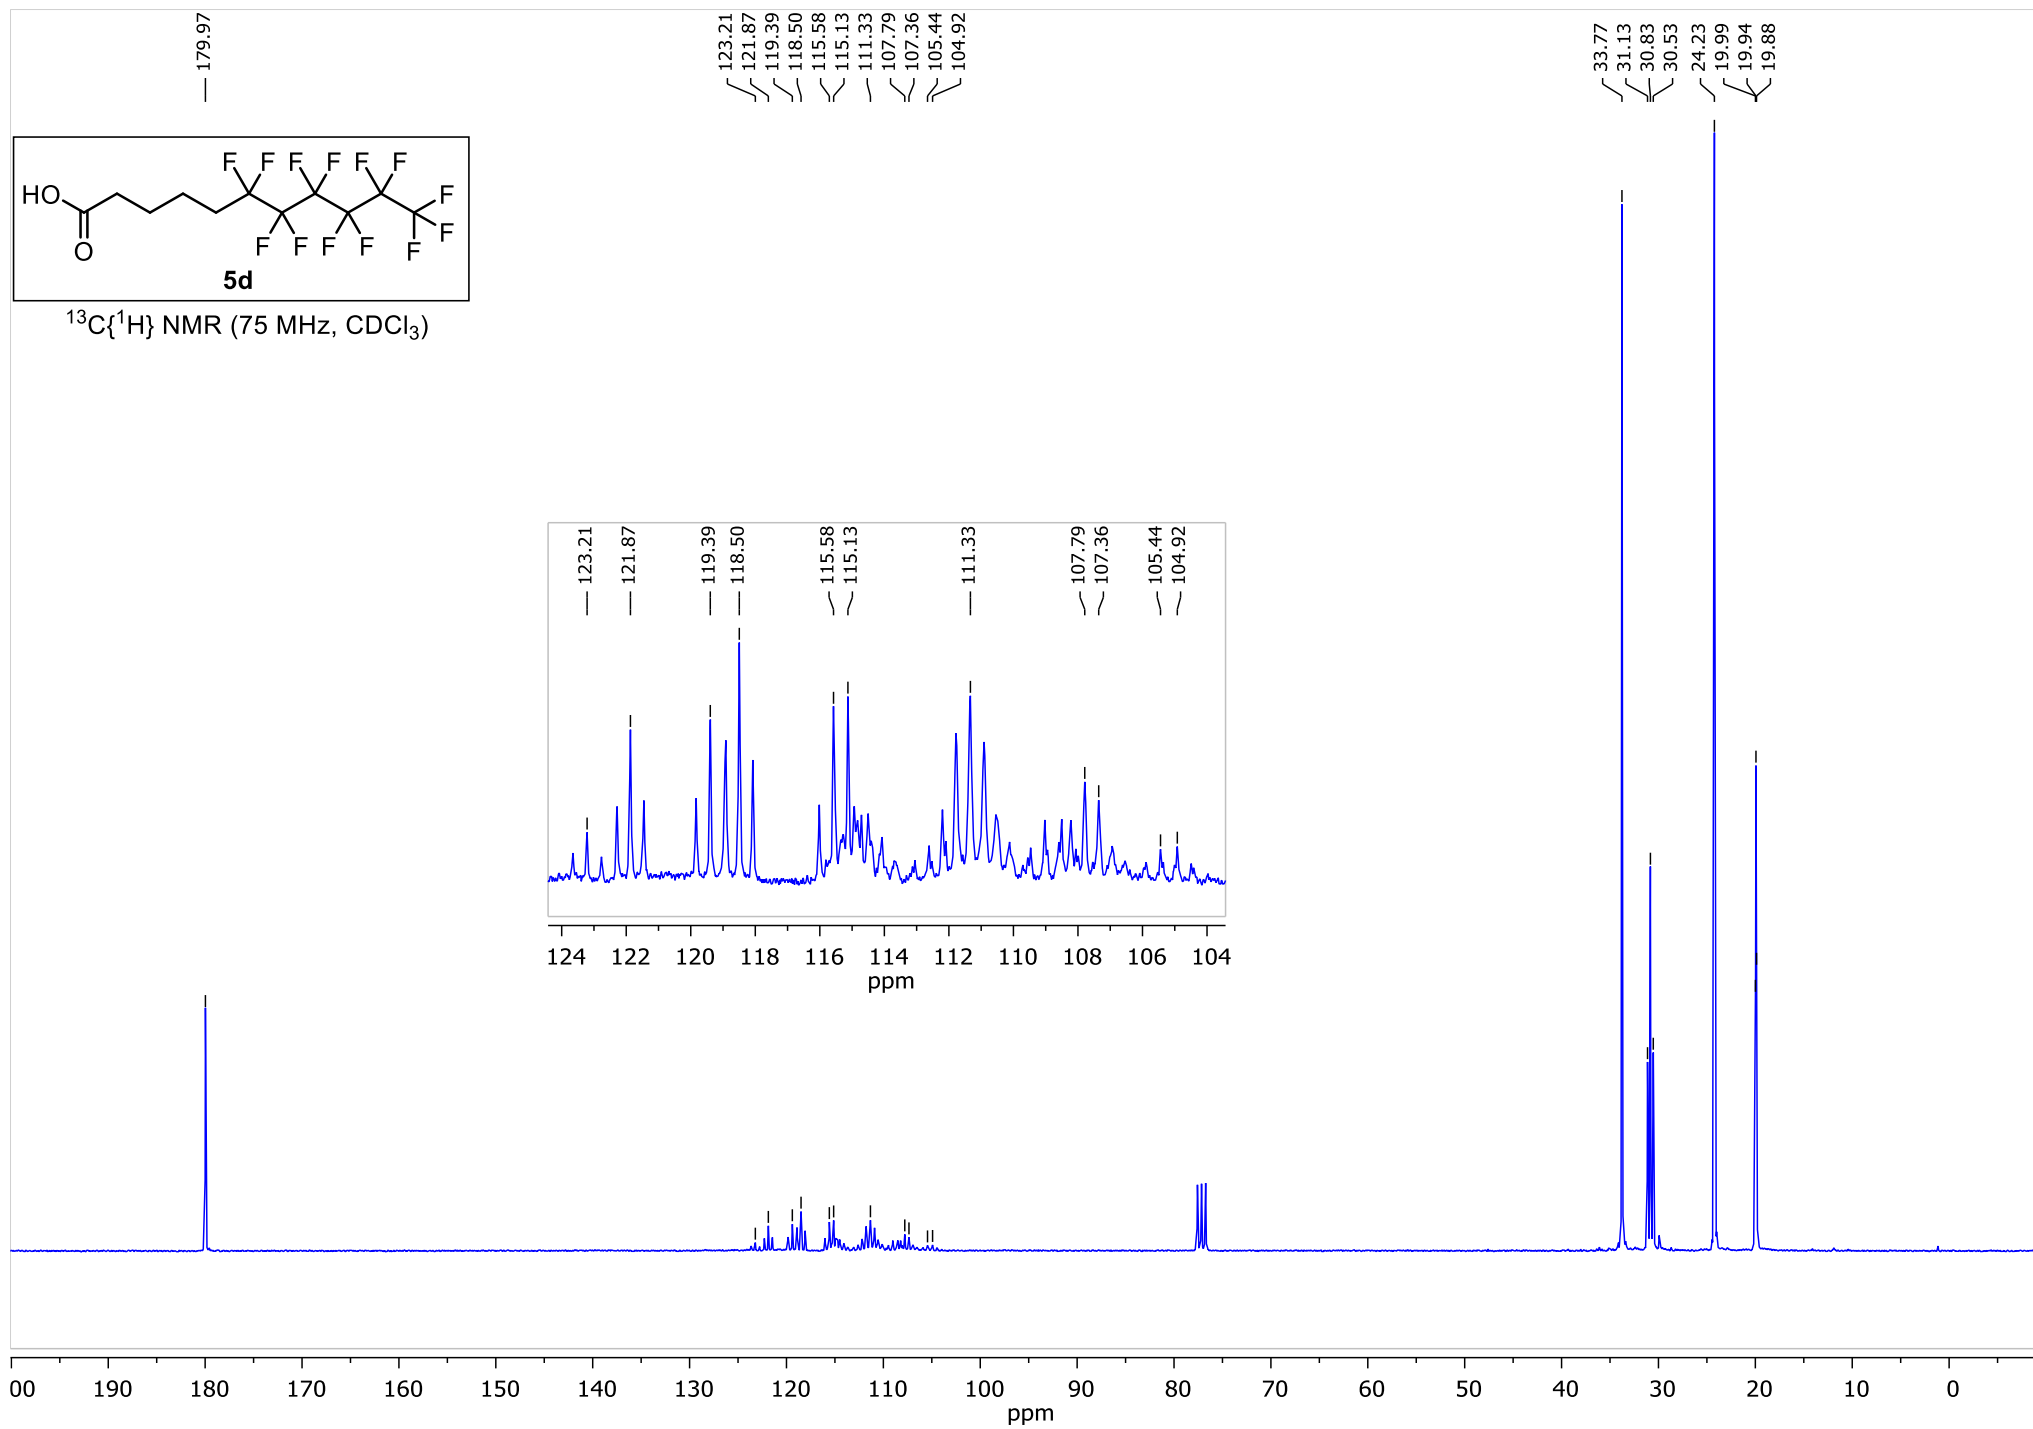

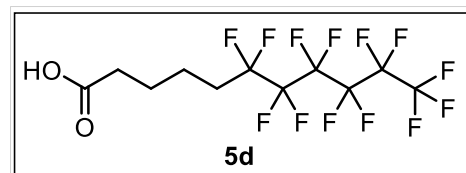

$^{19}\text{F}$  NMR (282 MHz,  $\text{CDCl}_3$ )

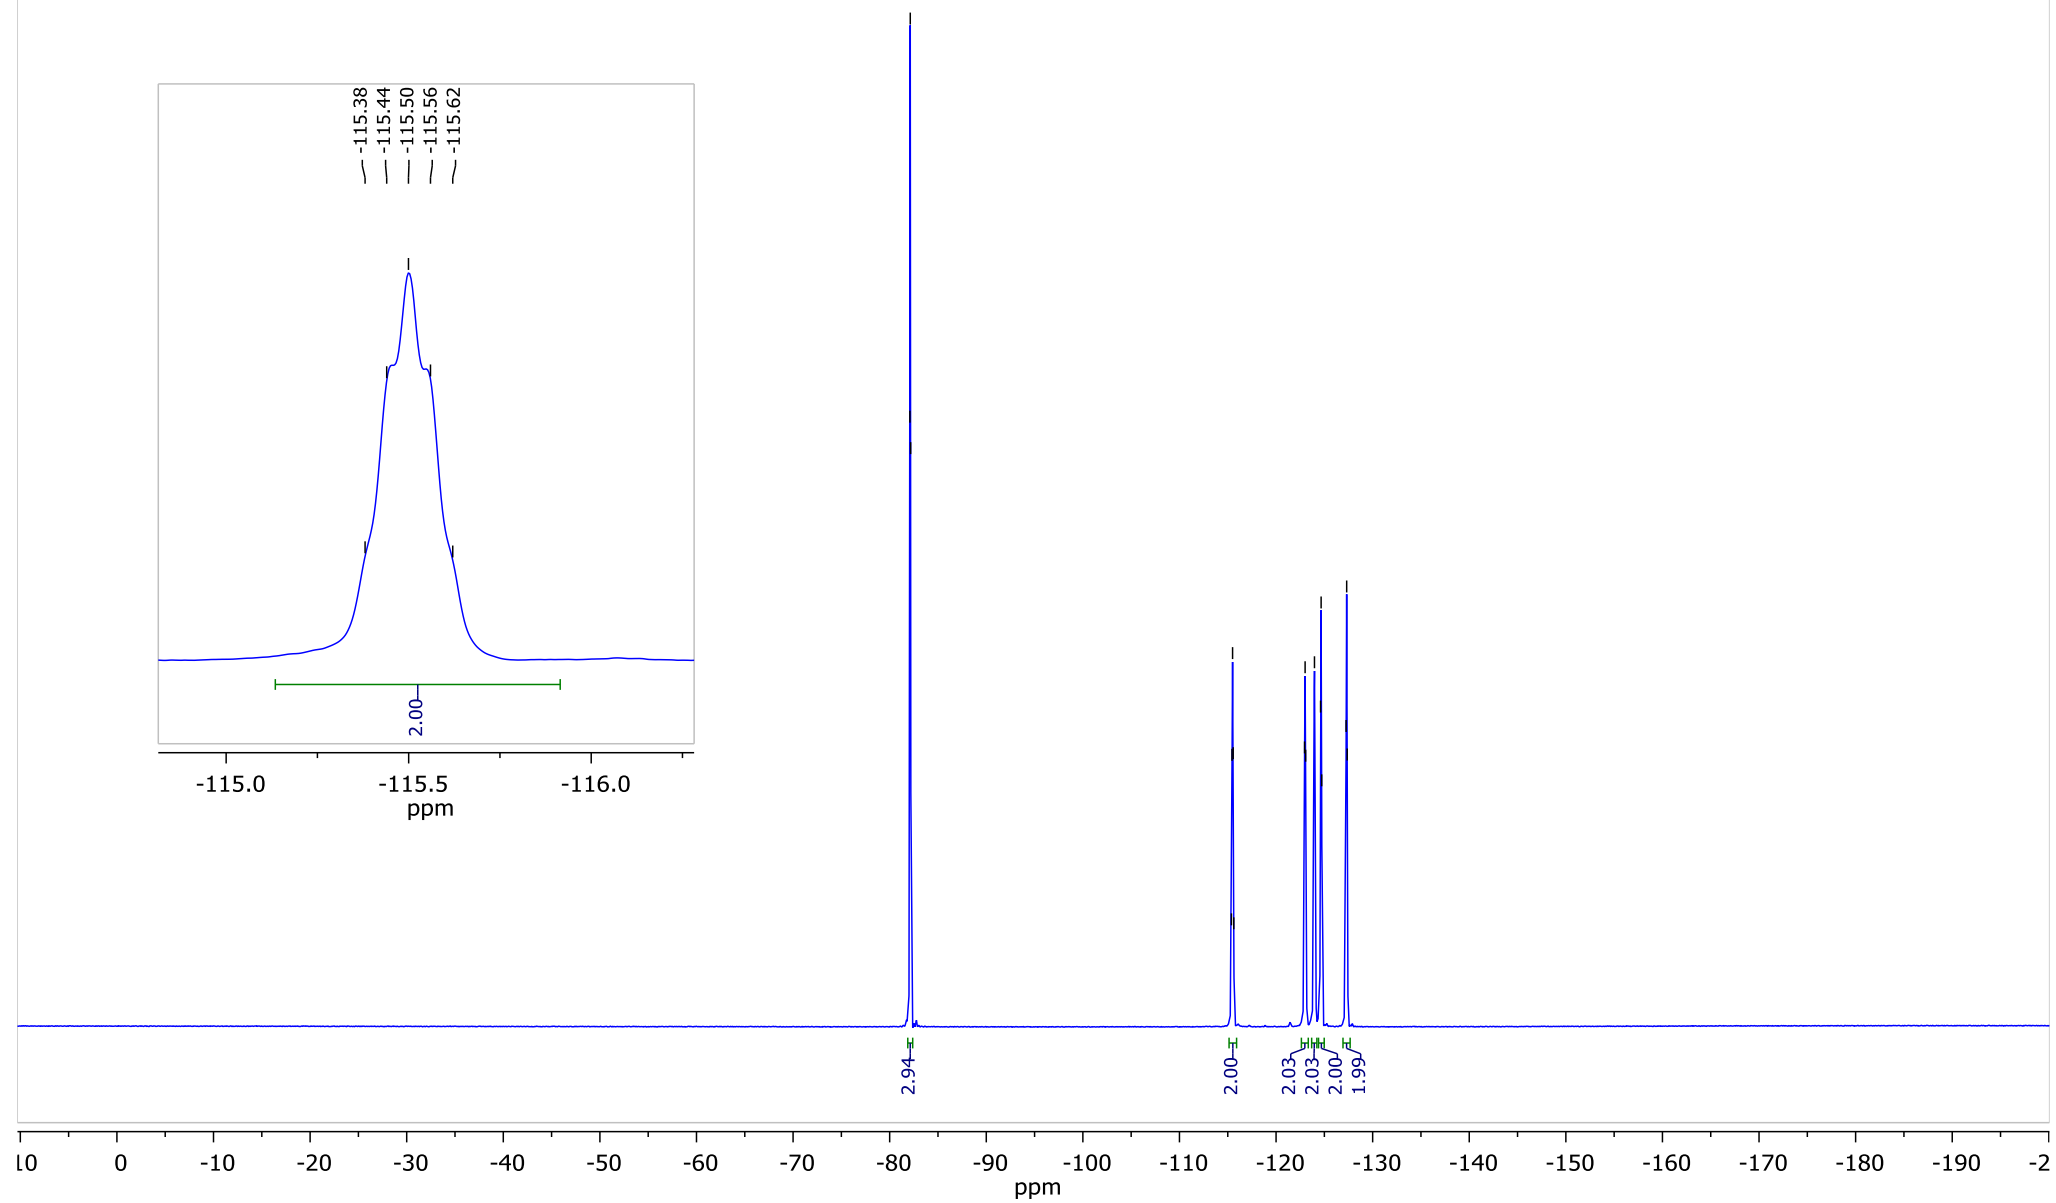

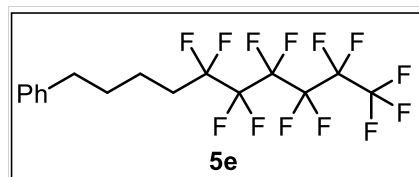

$^1\text{H NMR}$  (300 MHz,  $\text{CDCl}_3$ )

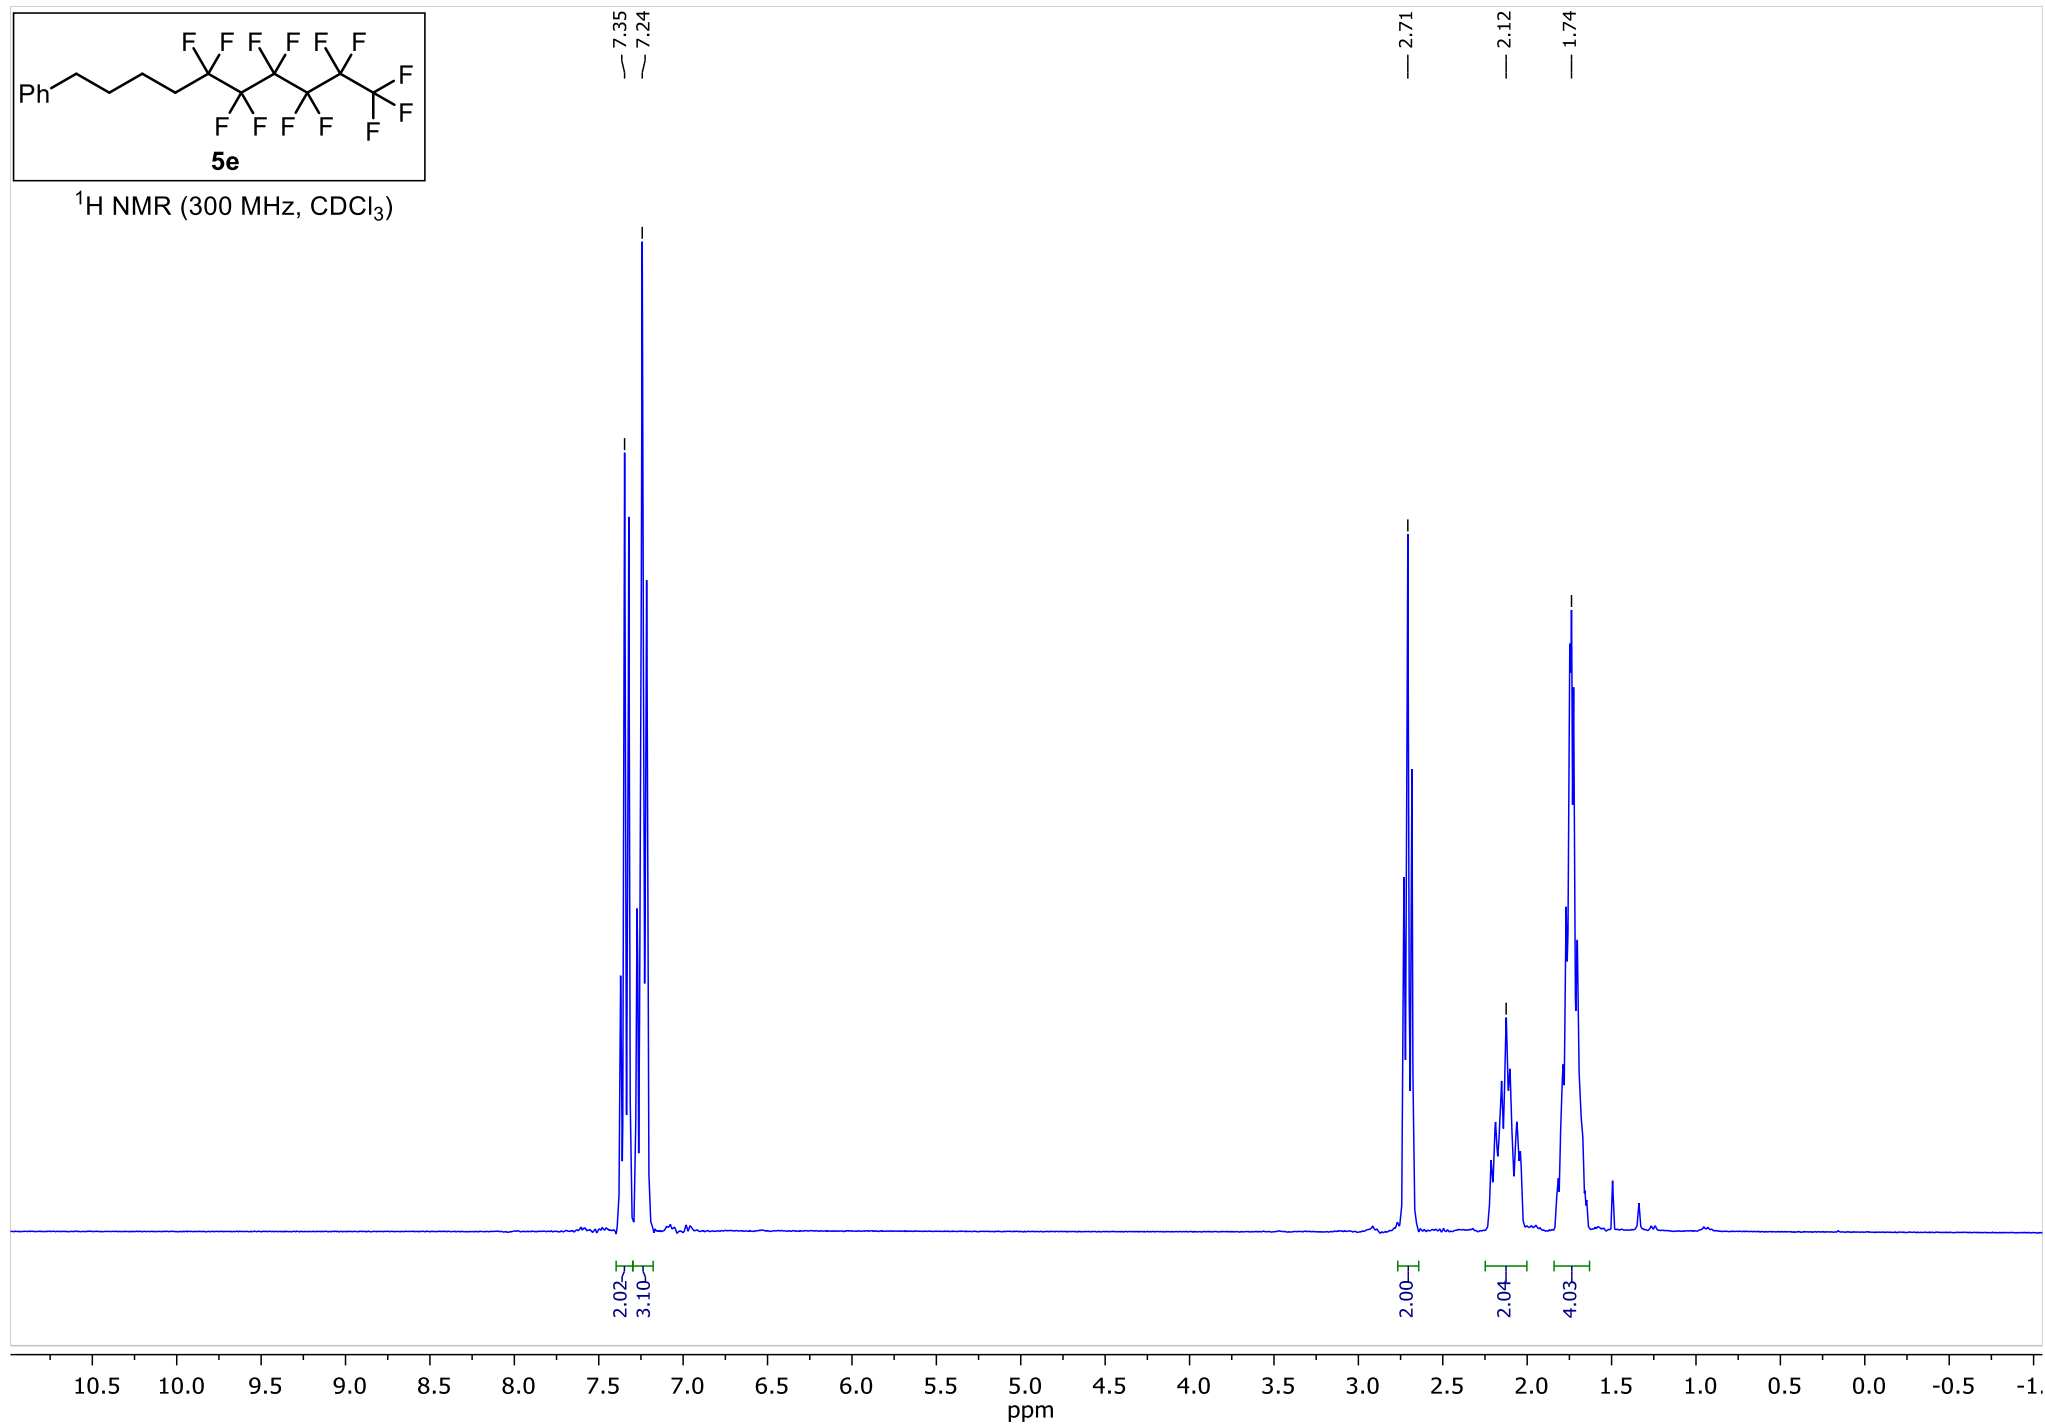

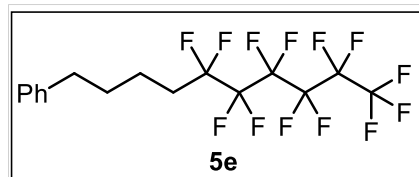

$^{13}\text{C}\{^1\text{H}\}$  NMR (75 MHz,  $\text{CDCl}_3$ )

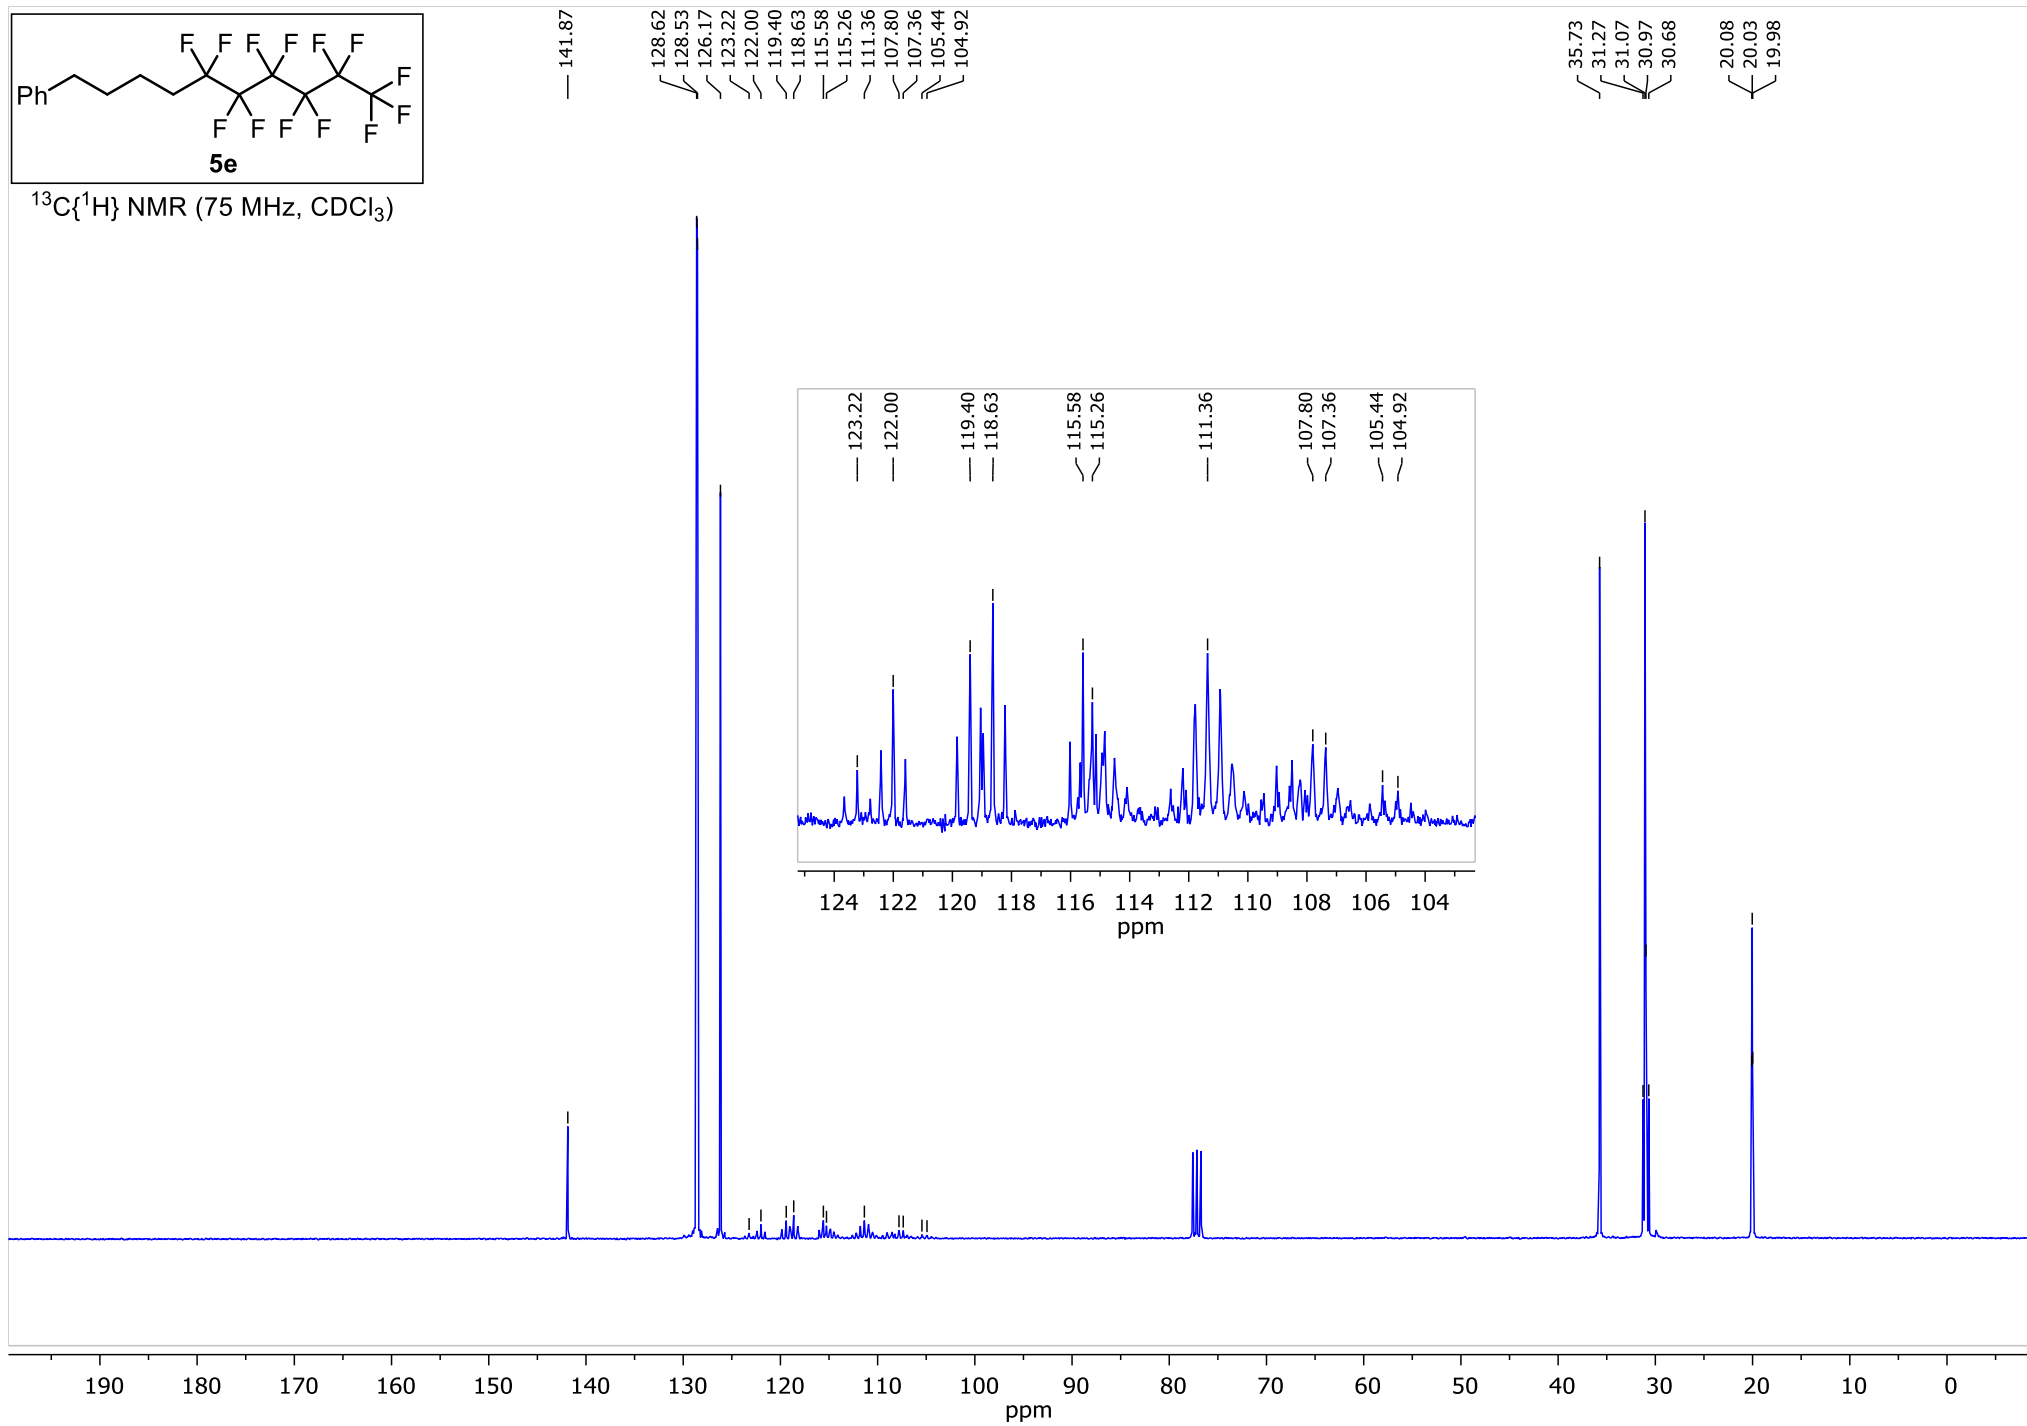

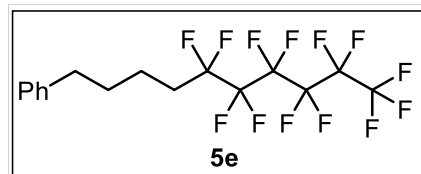

$^{19}\text{F}$  NMR (282 MHz,  $\text{CDCl}_3$ )

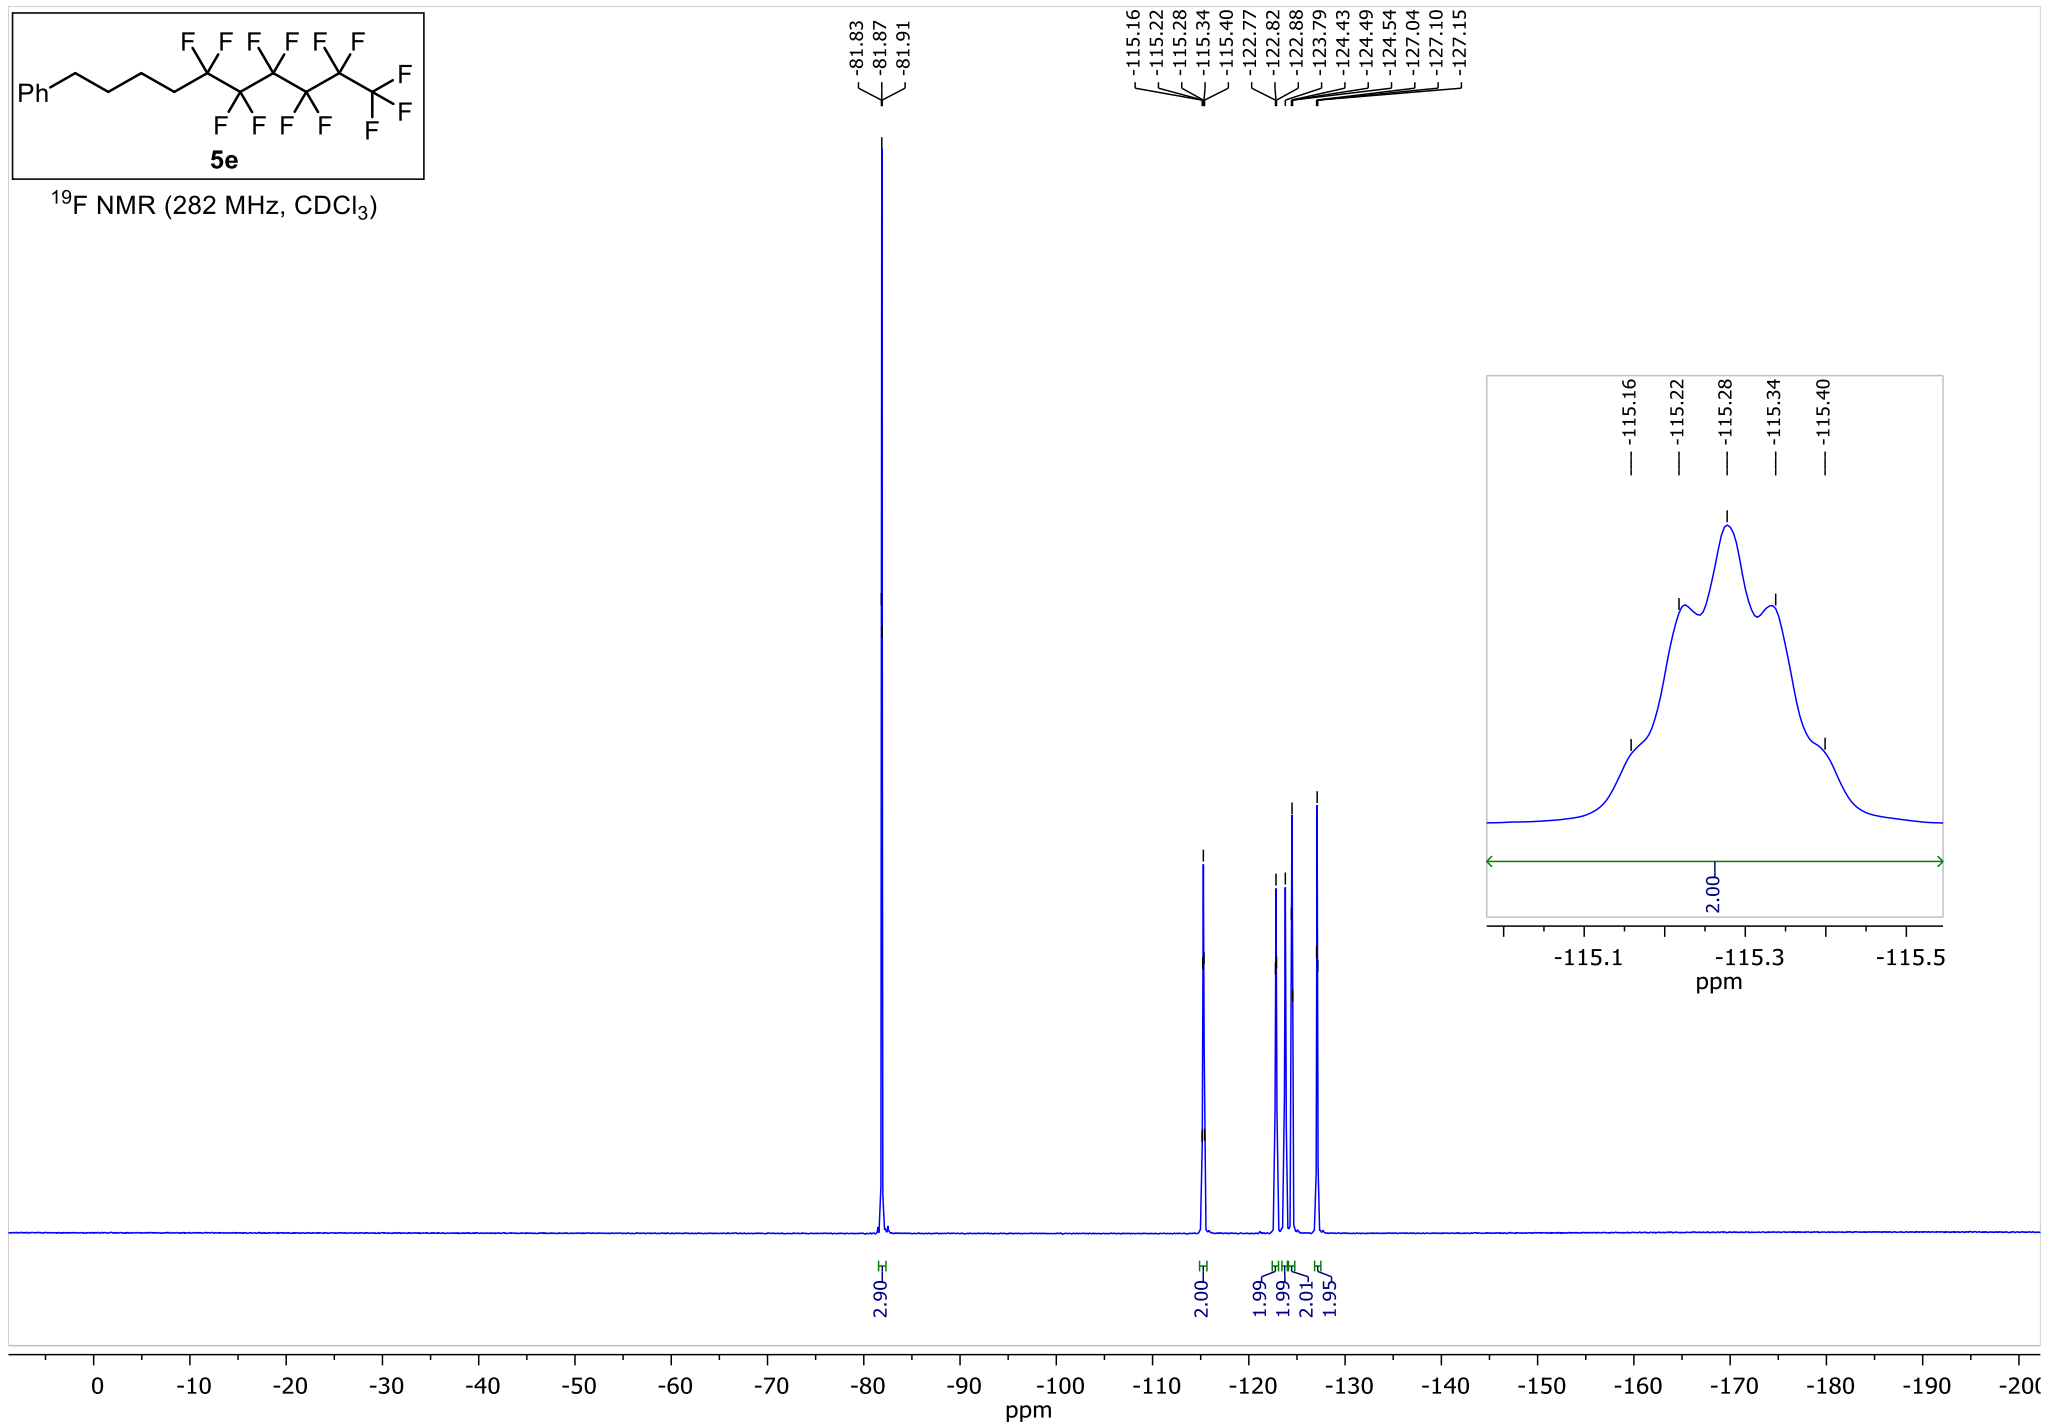

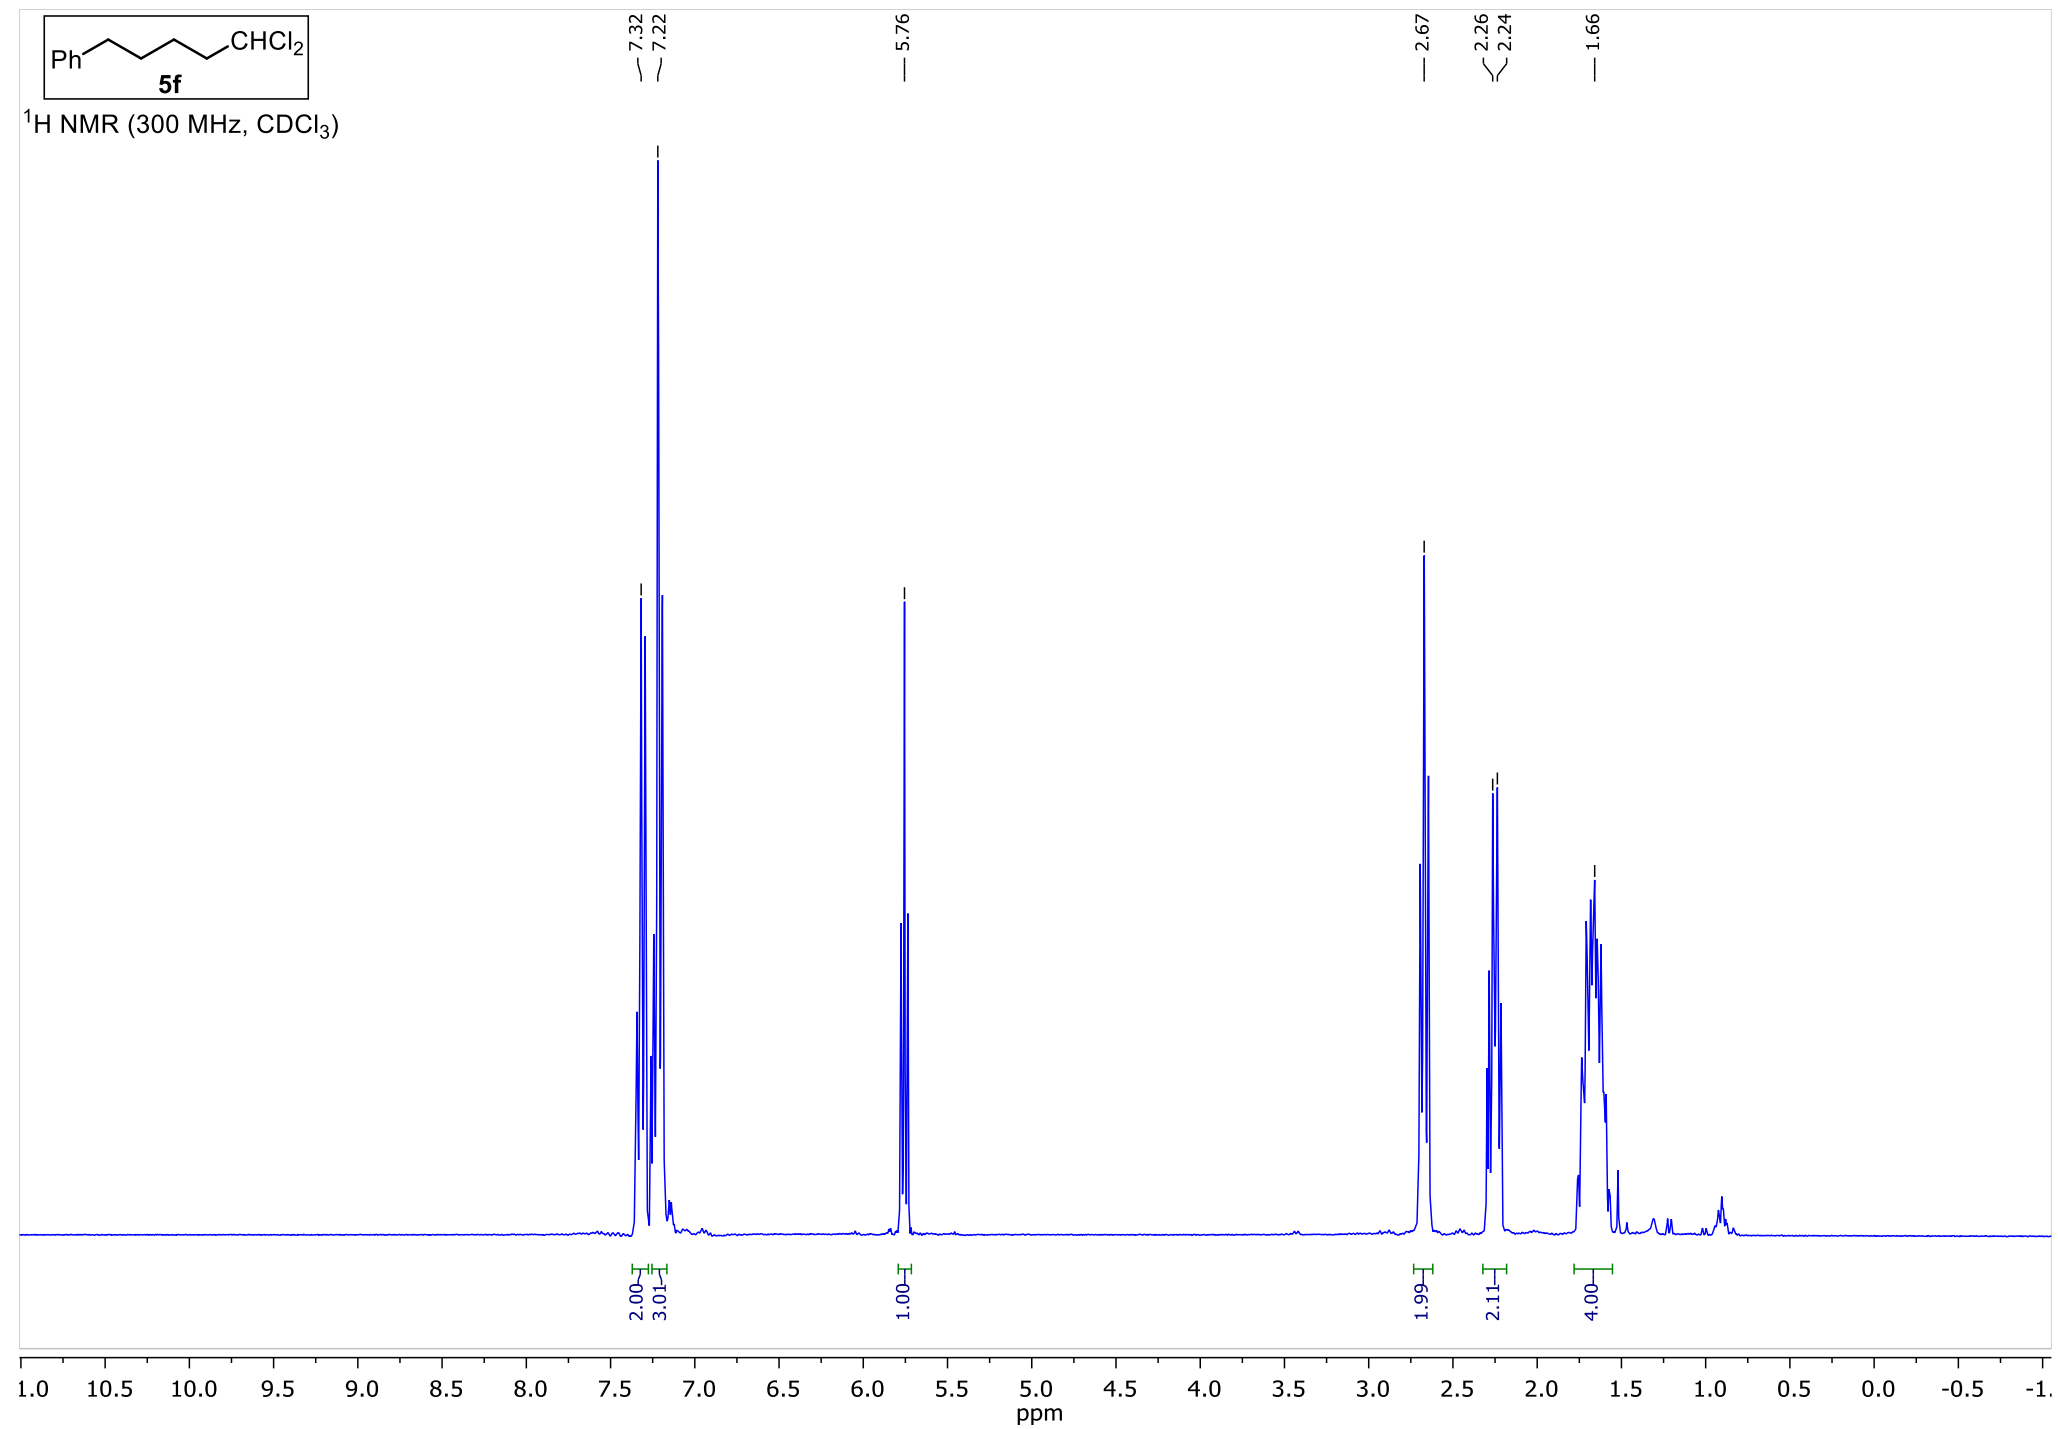

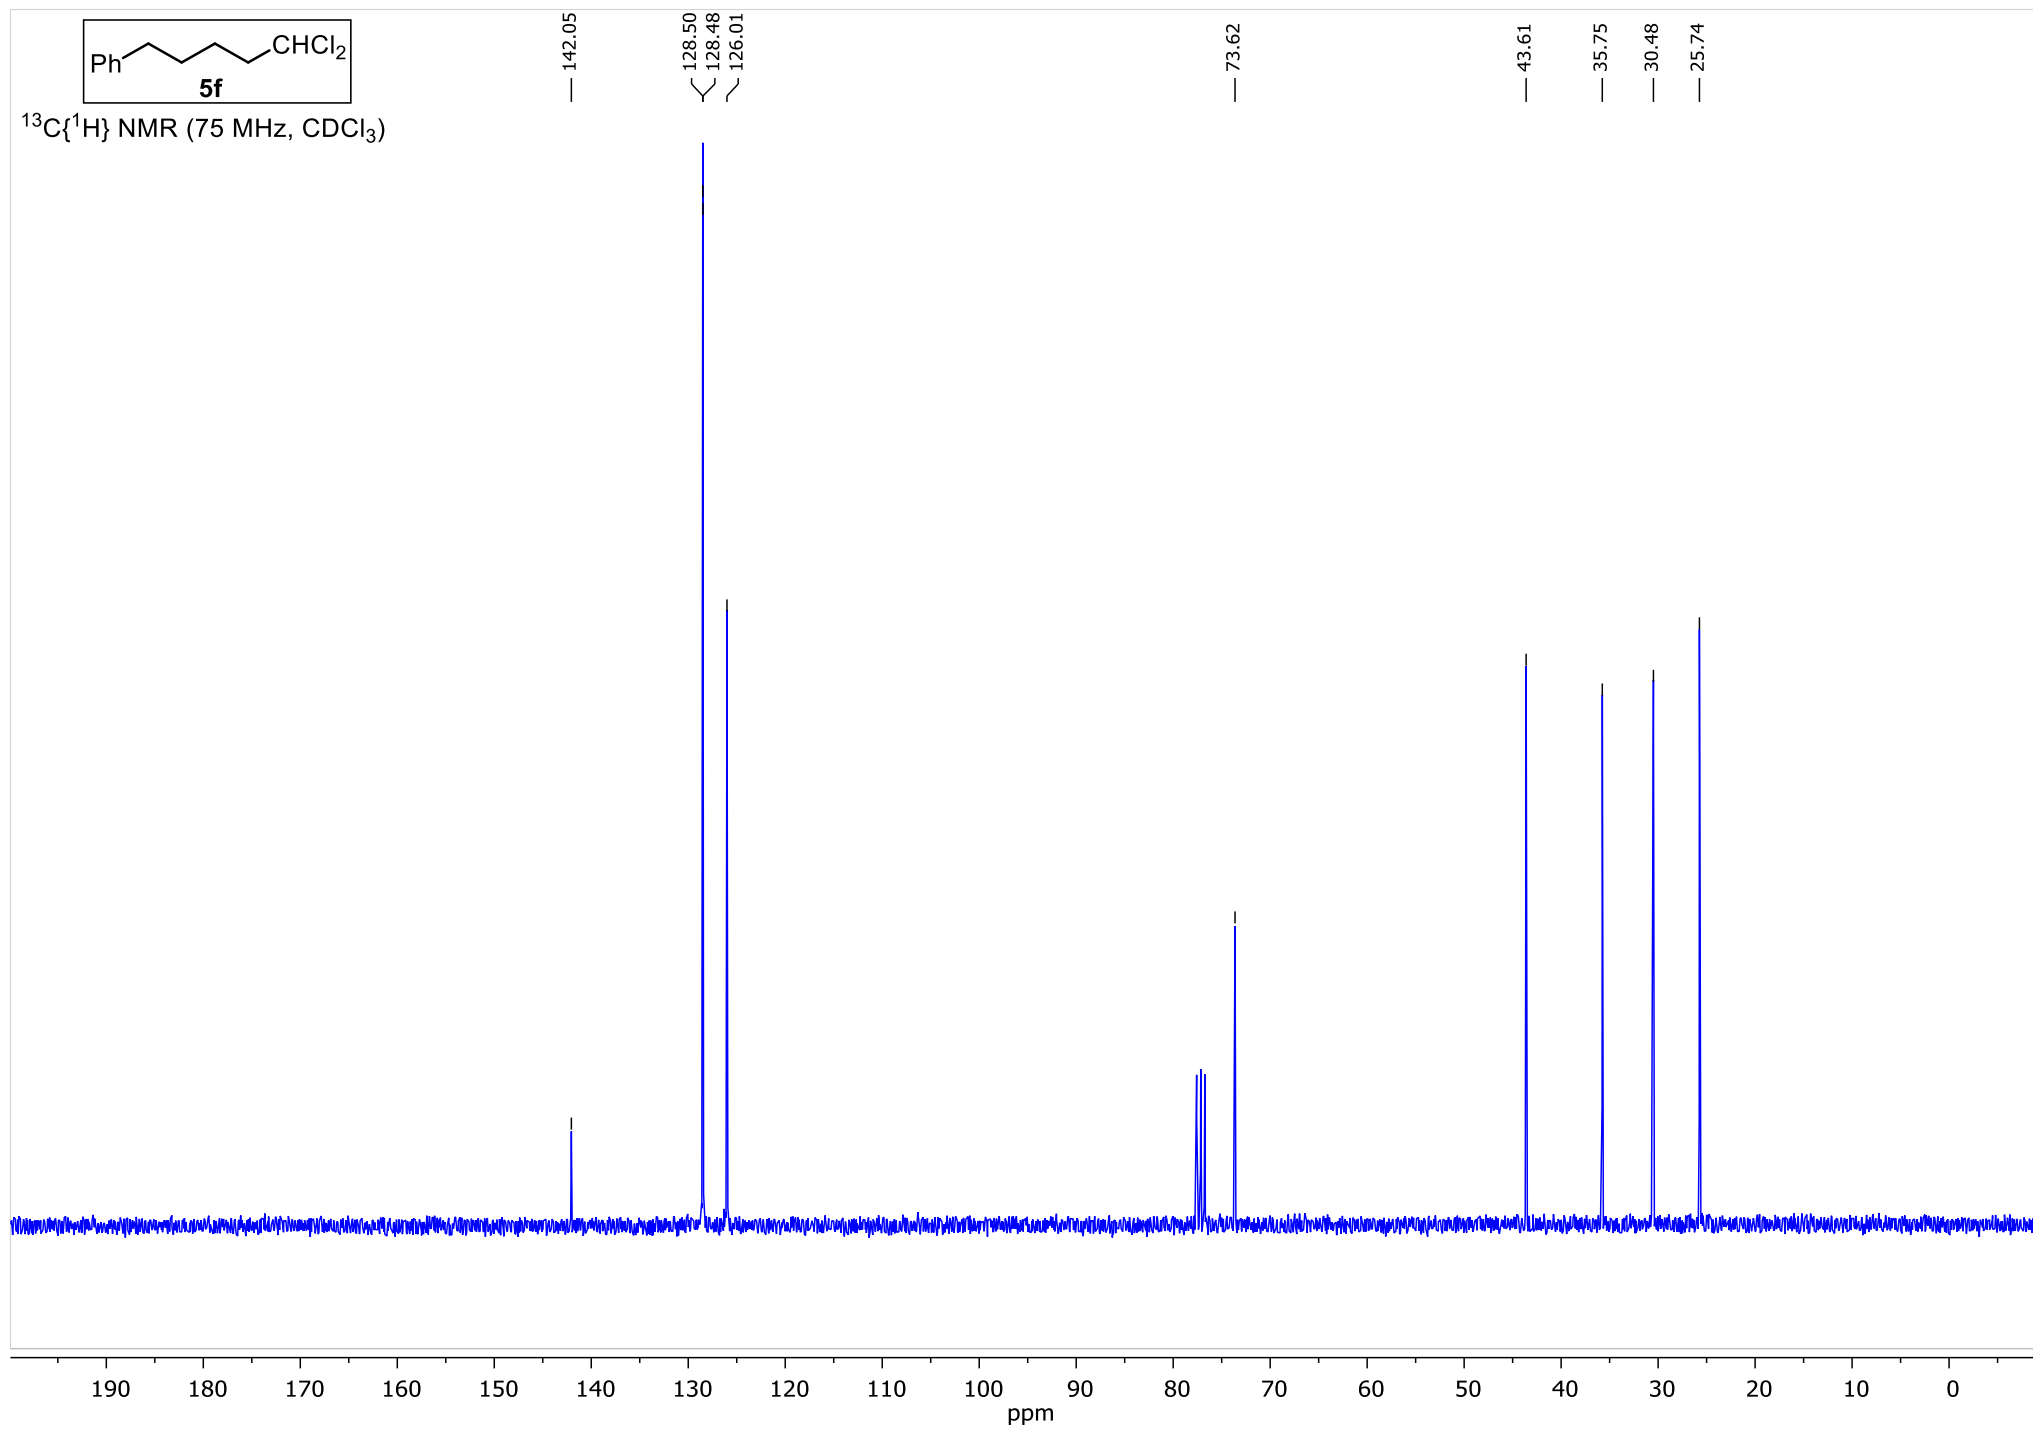



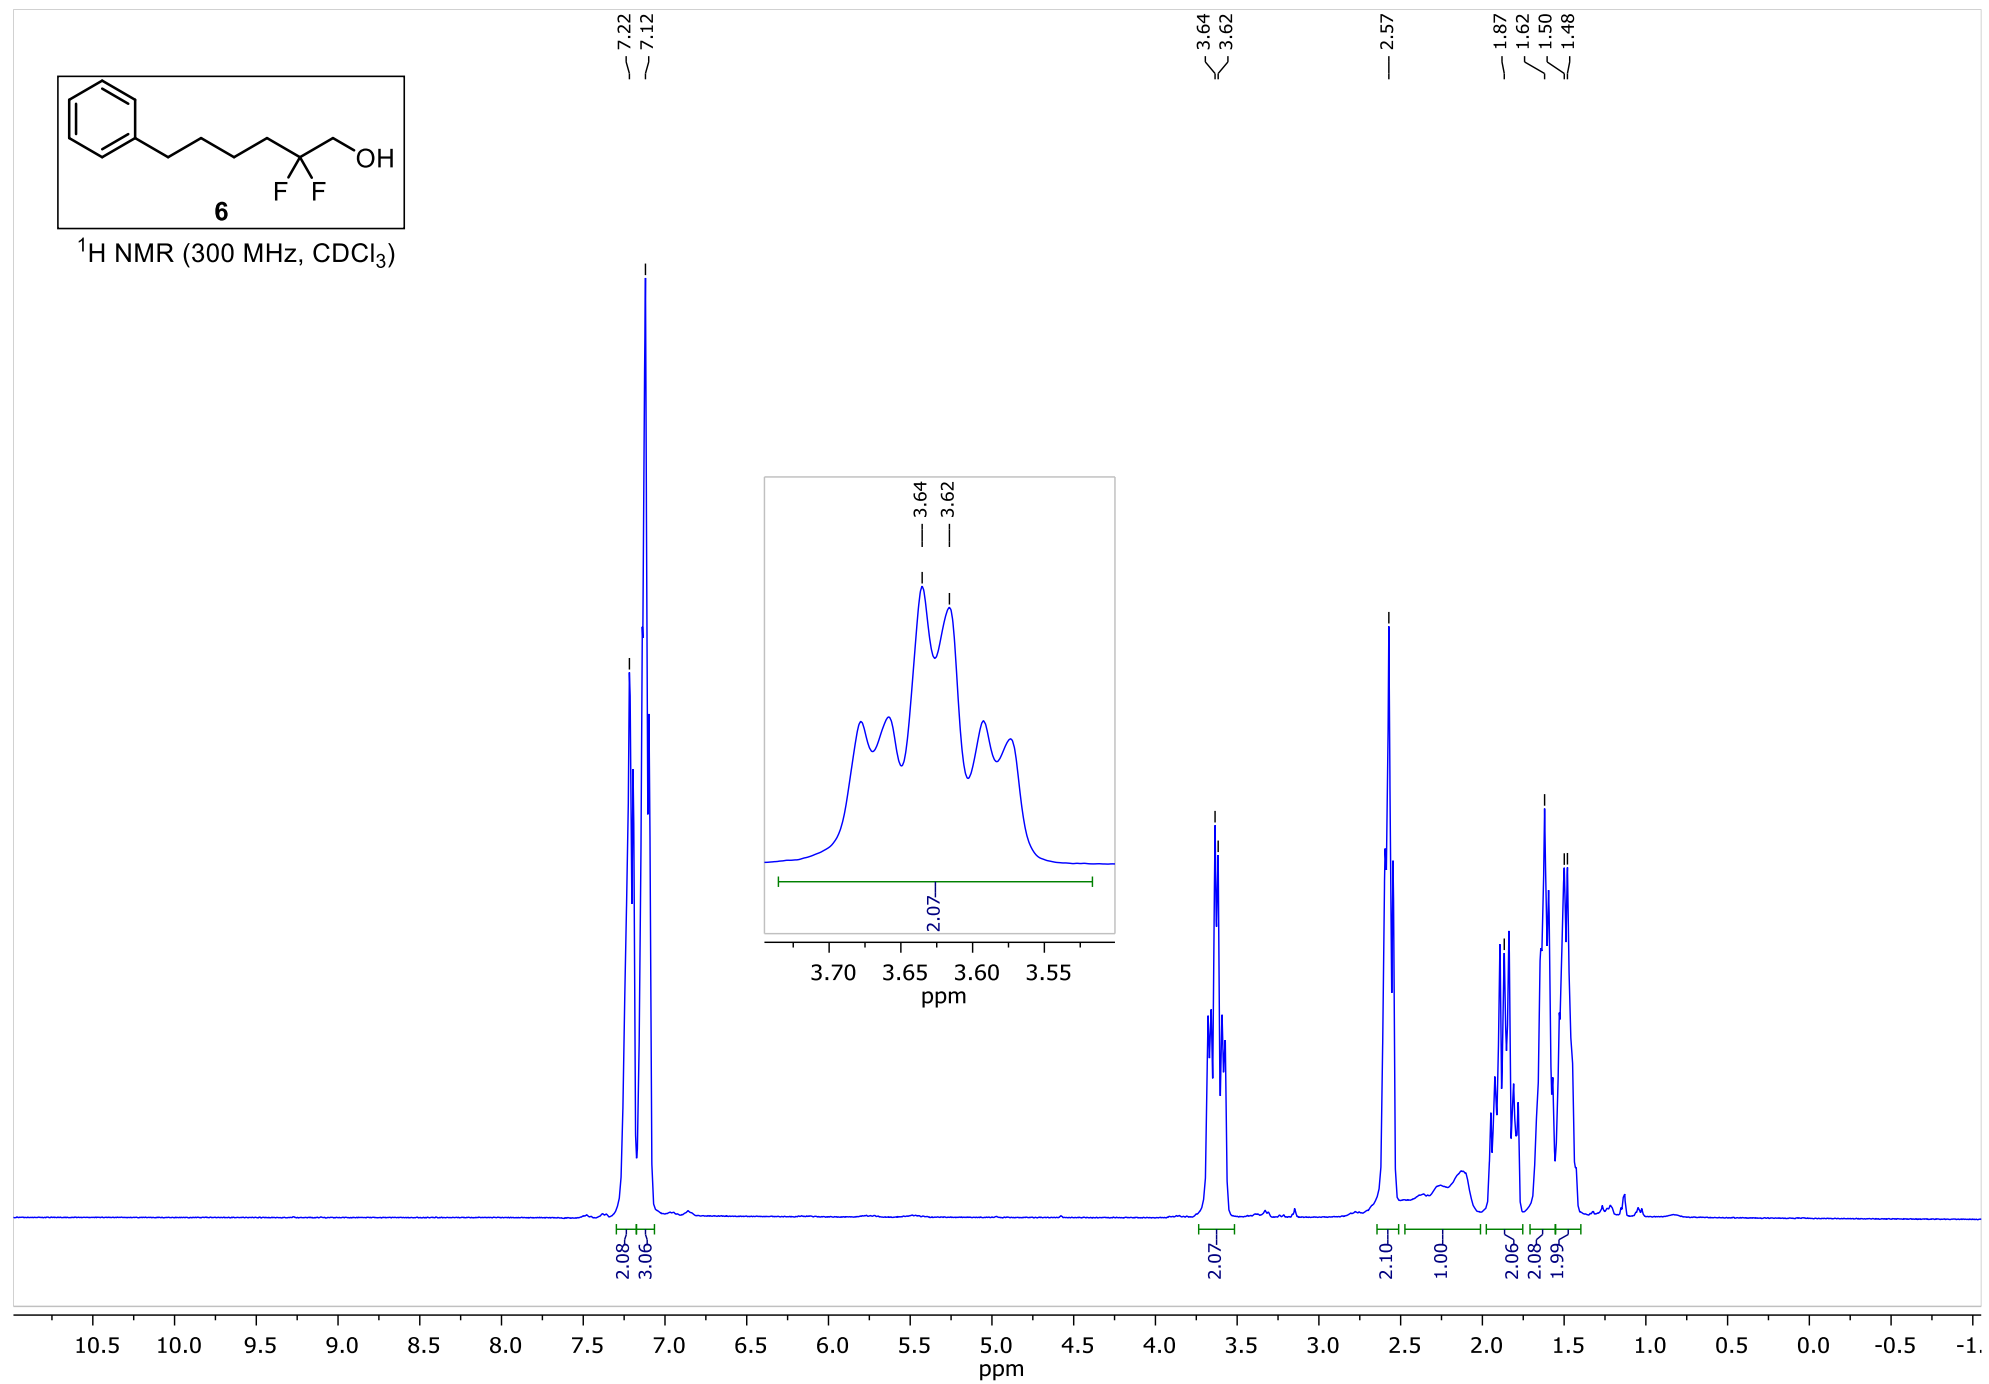

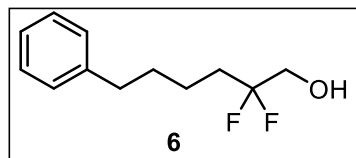

$^{13}\text{C}\{^1\text{H}\}$  NMR (75 MHz,  $\text{CDCl}_3$ )

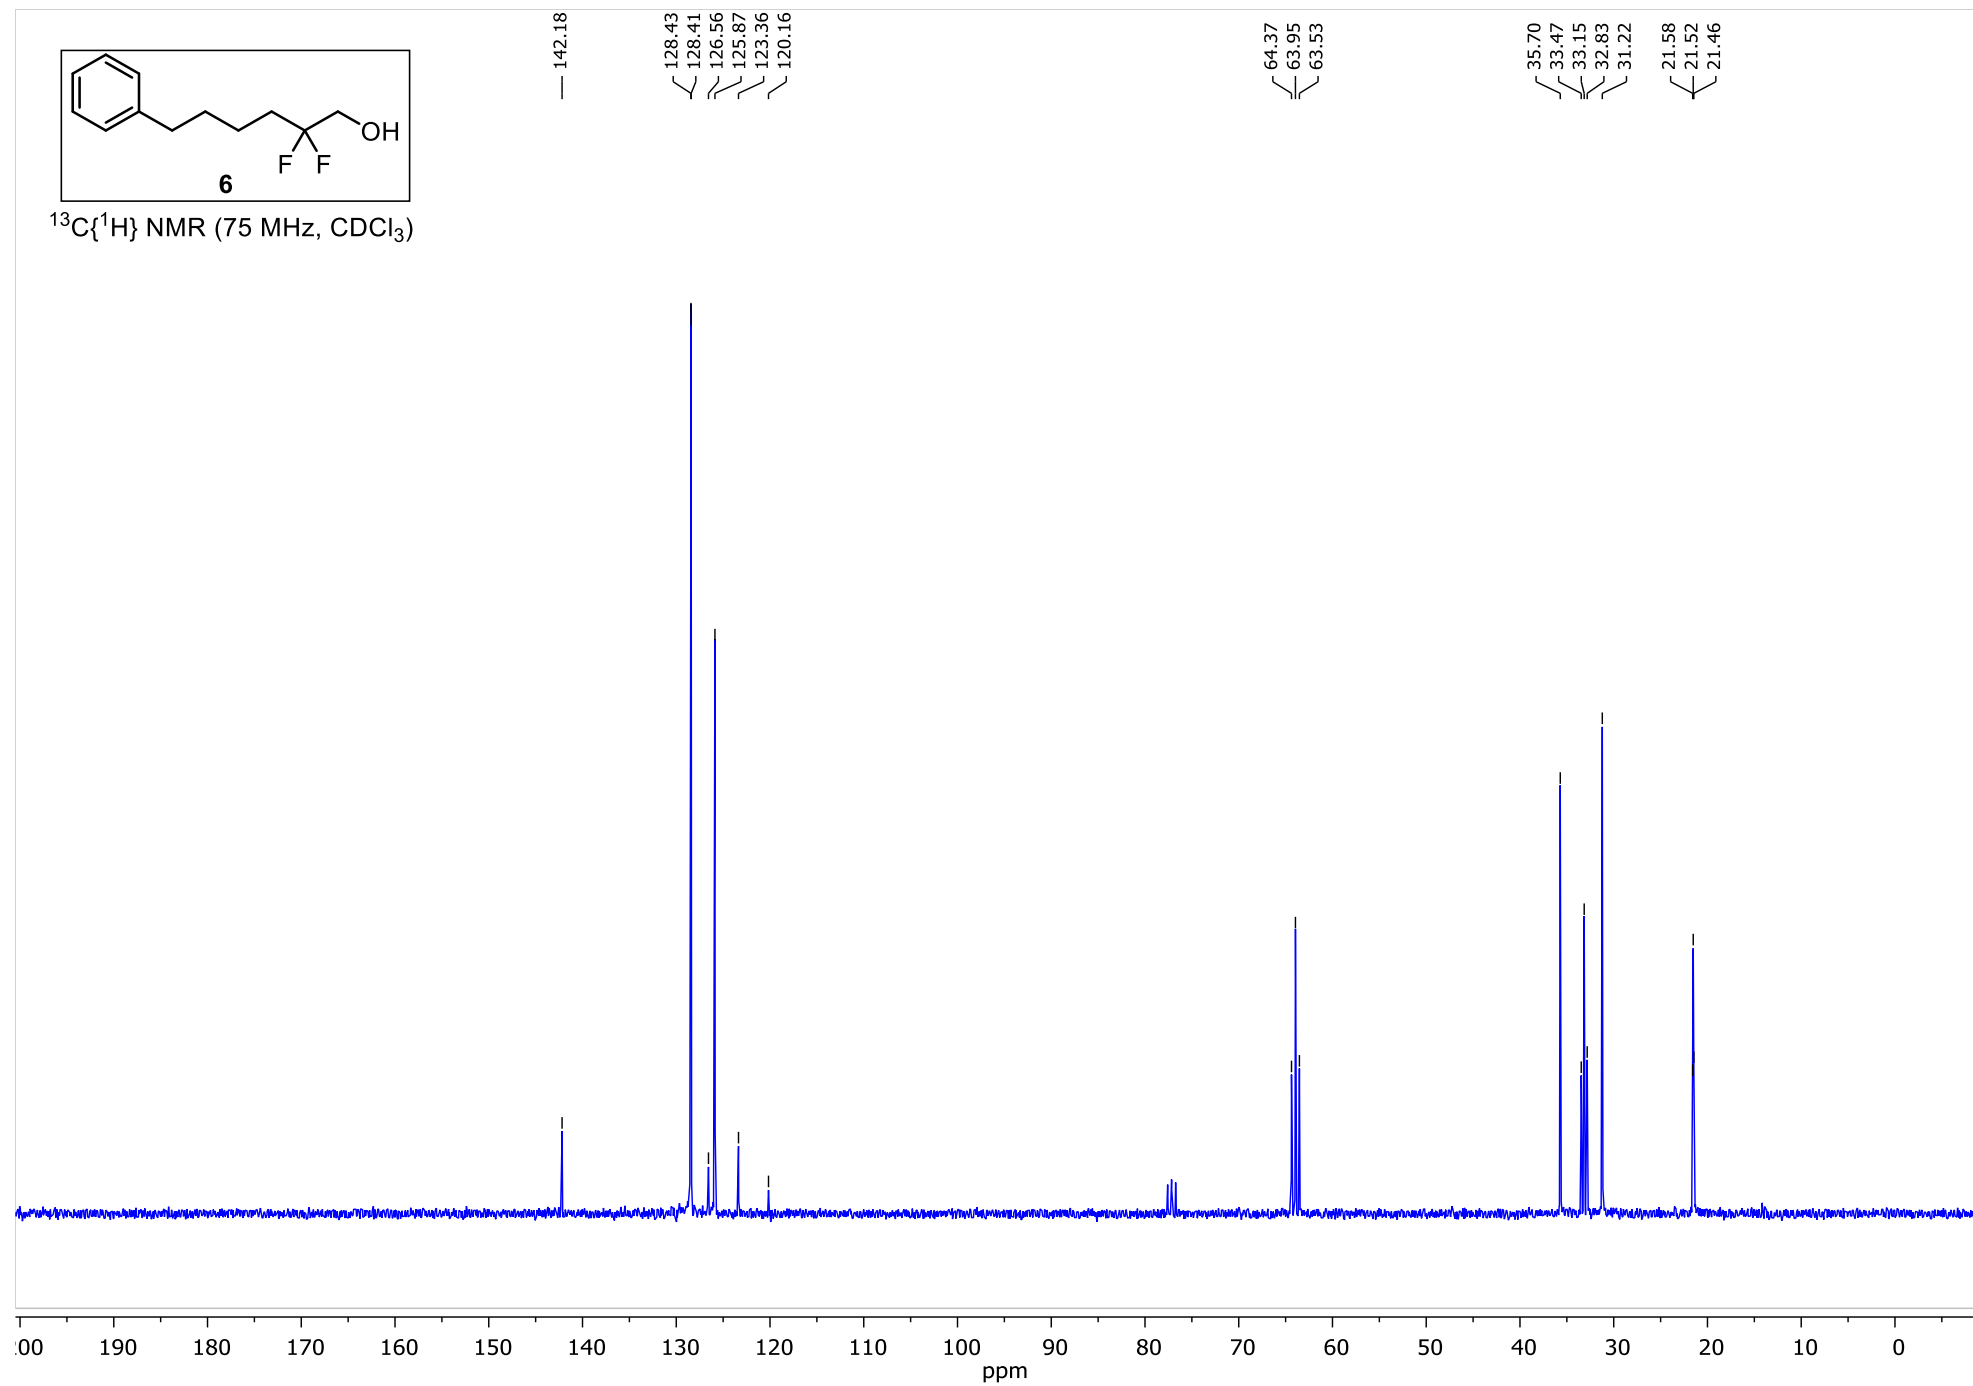

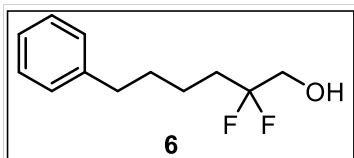

$^{19}\text{F}$  NMR (282 MHz,  $\text{CDCl}_3$ )

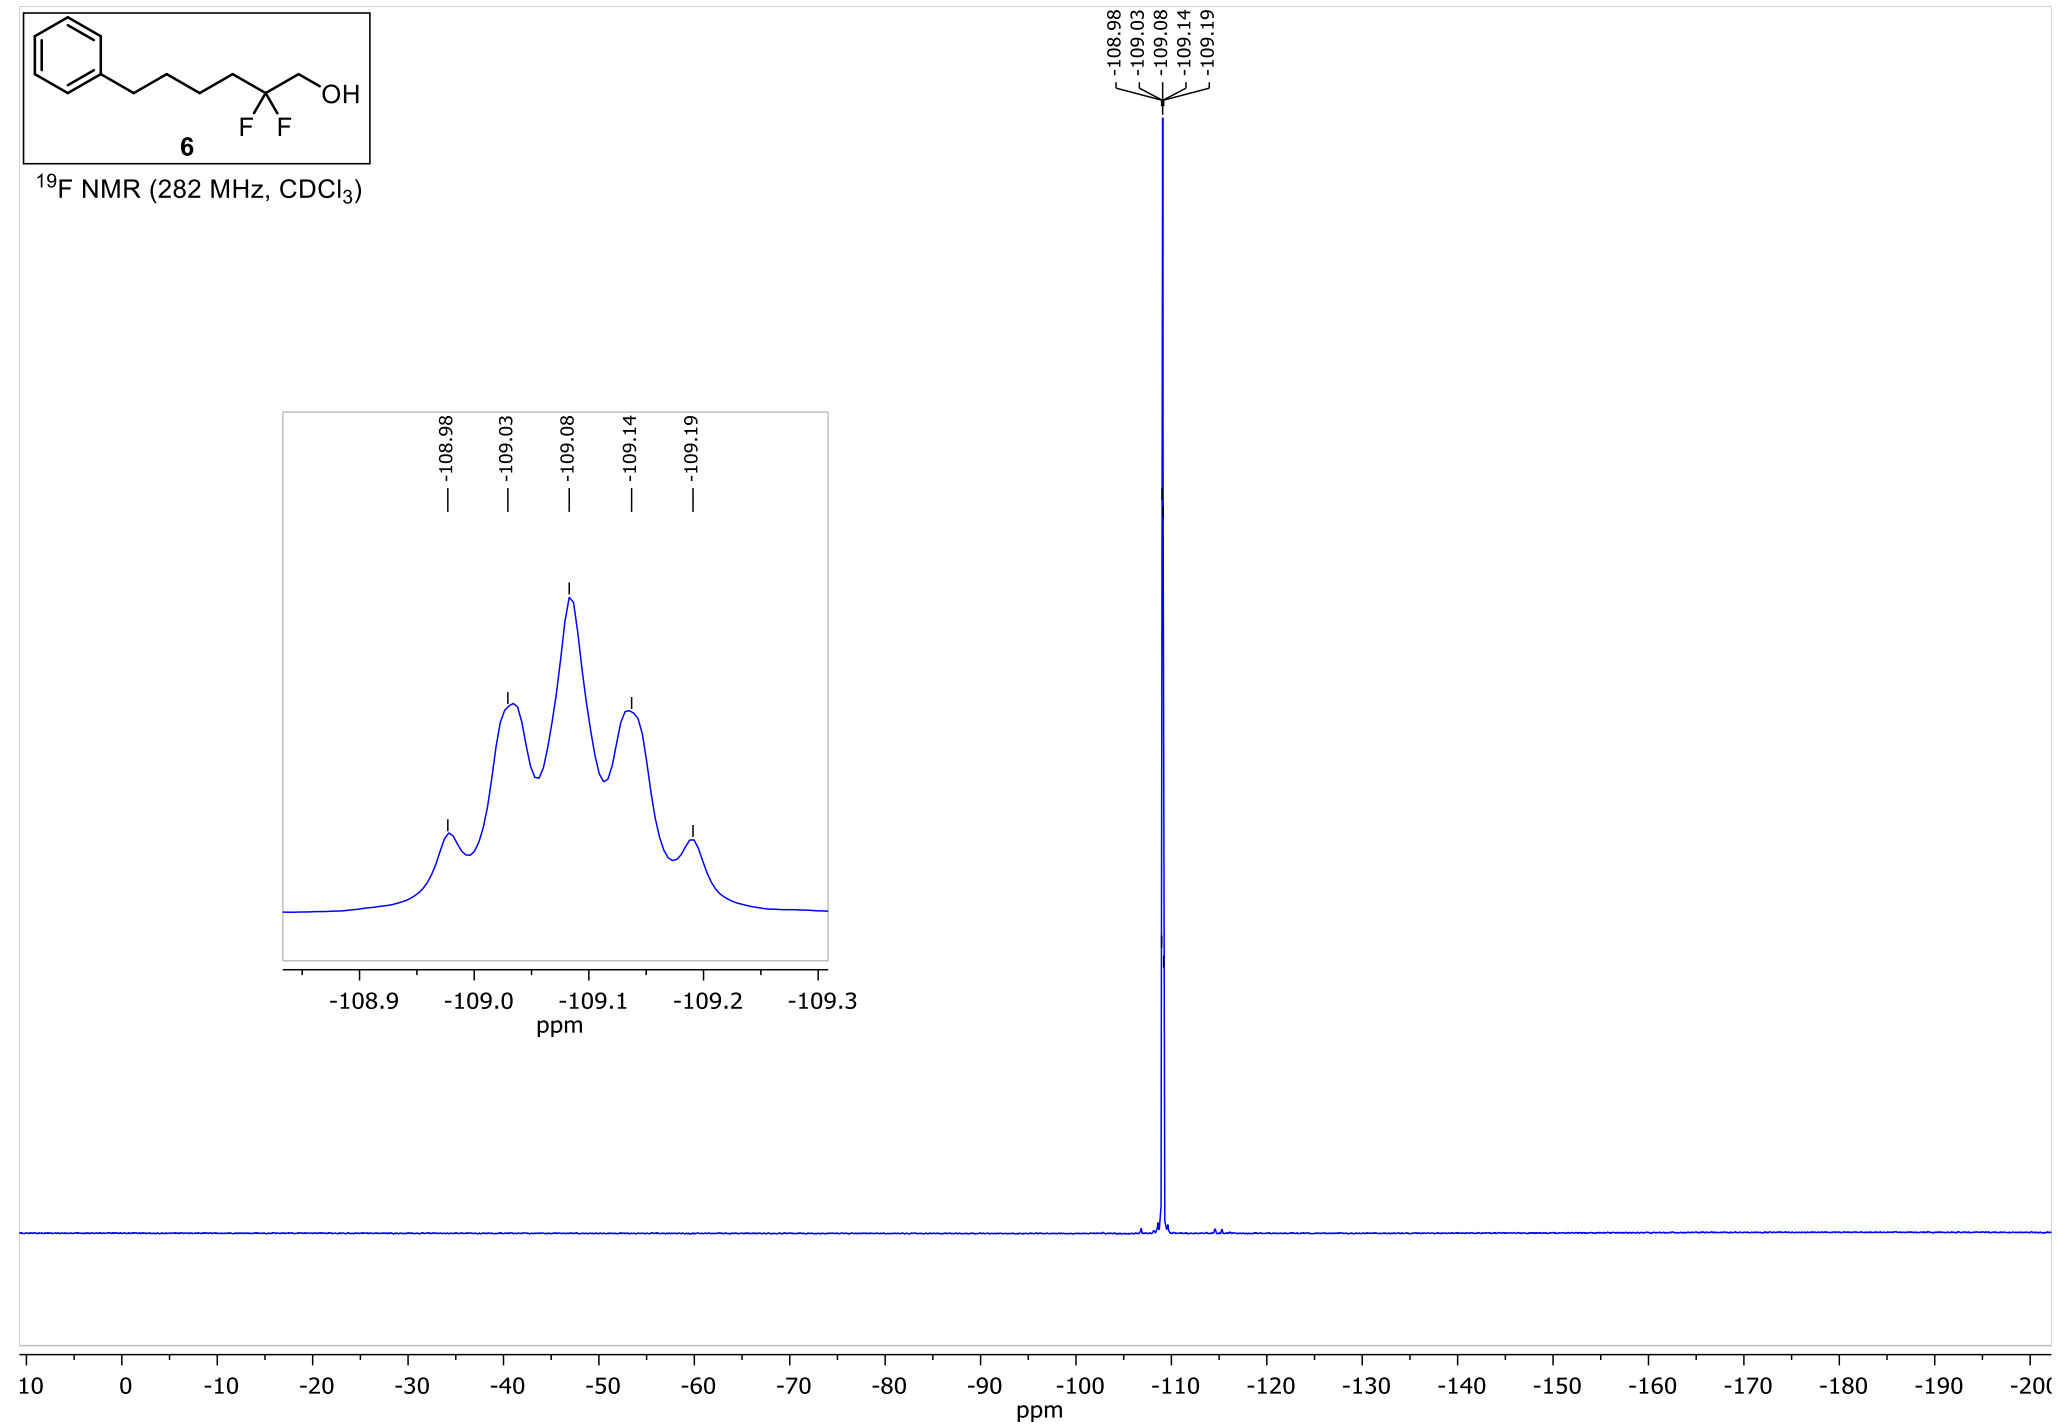

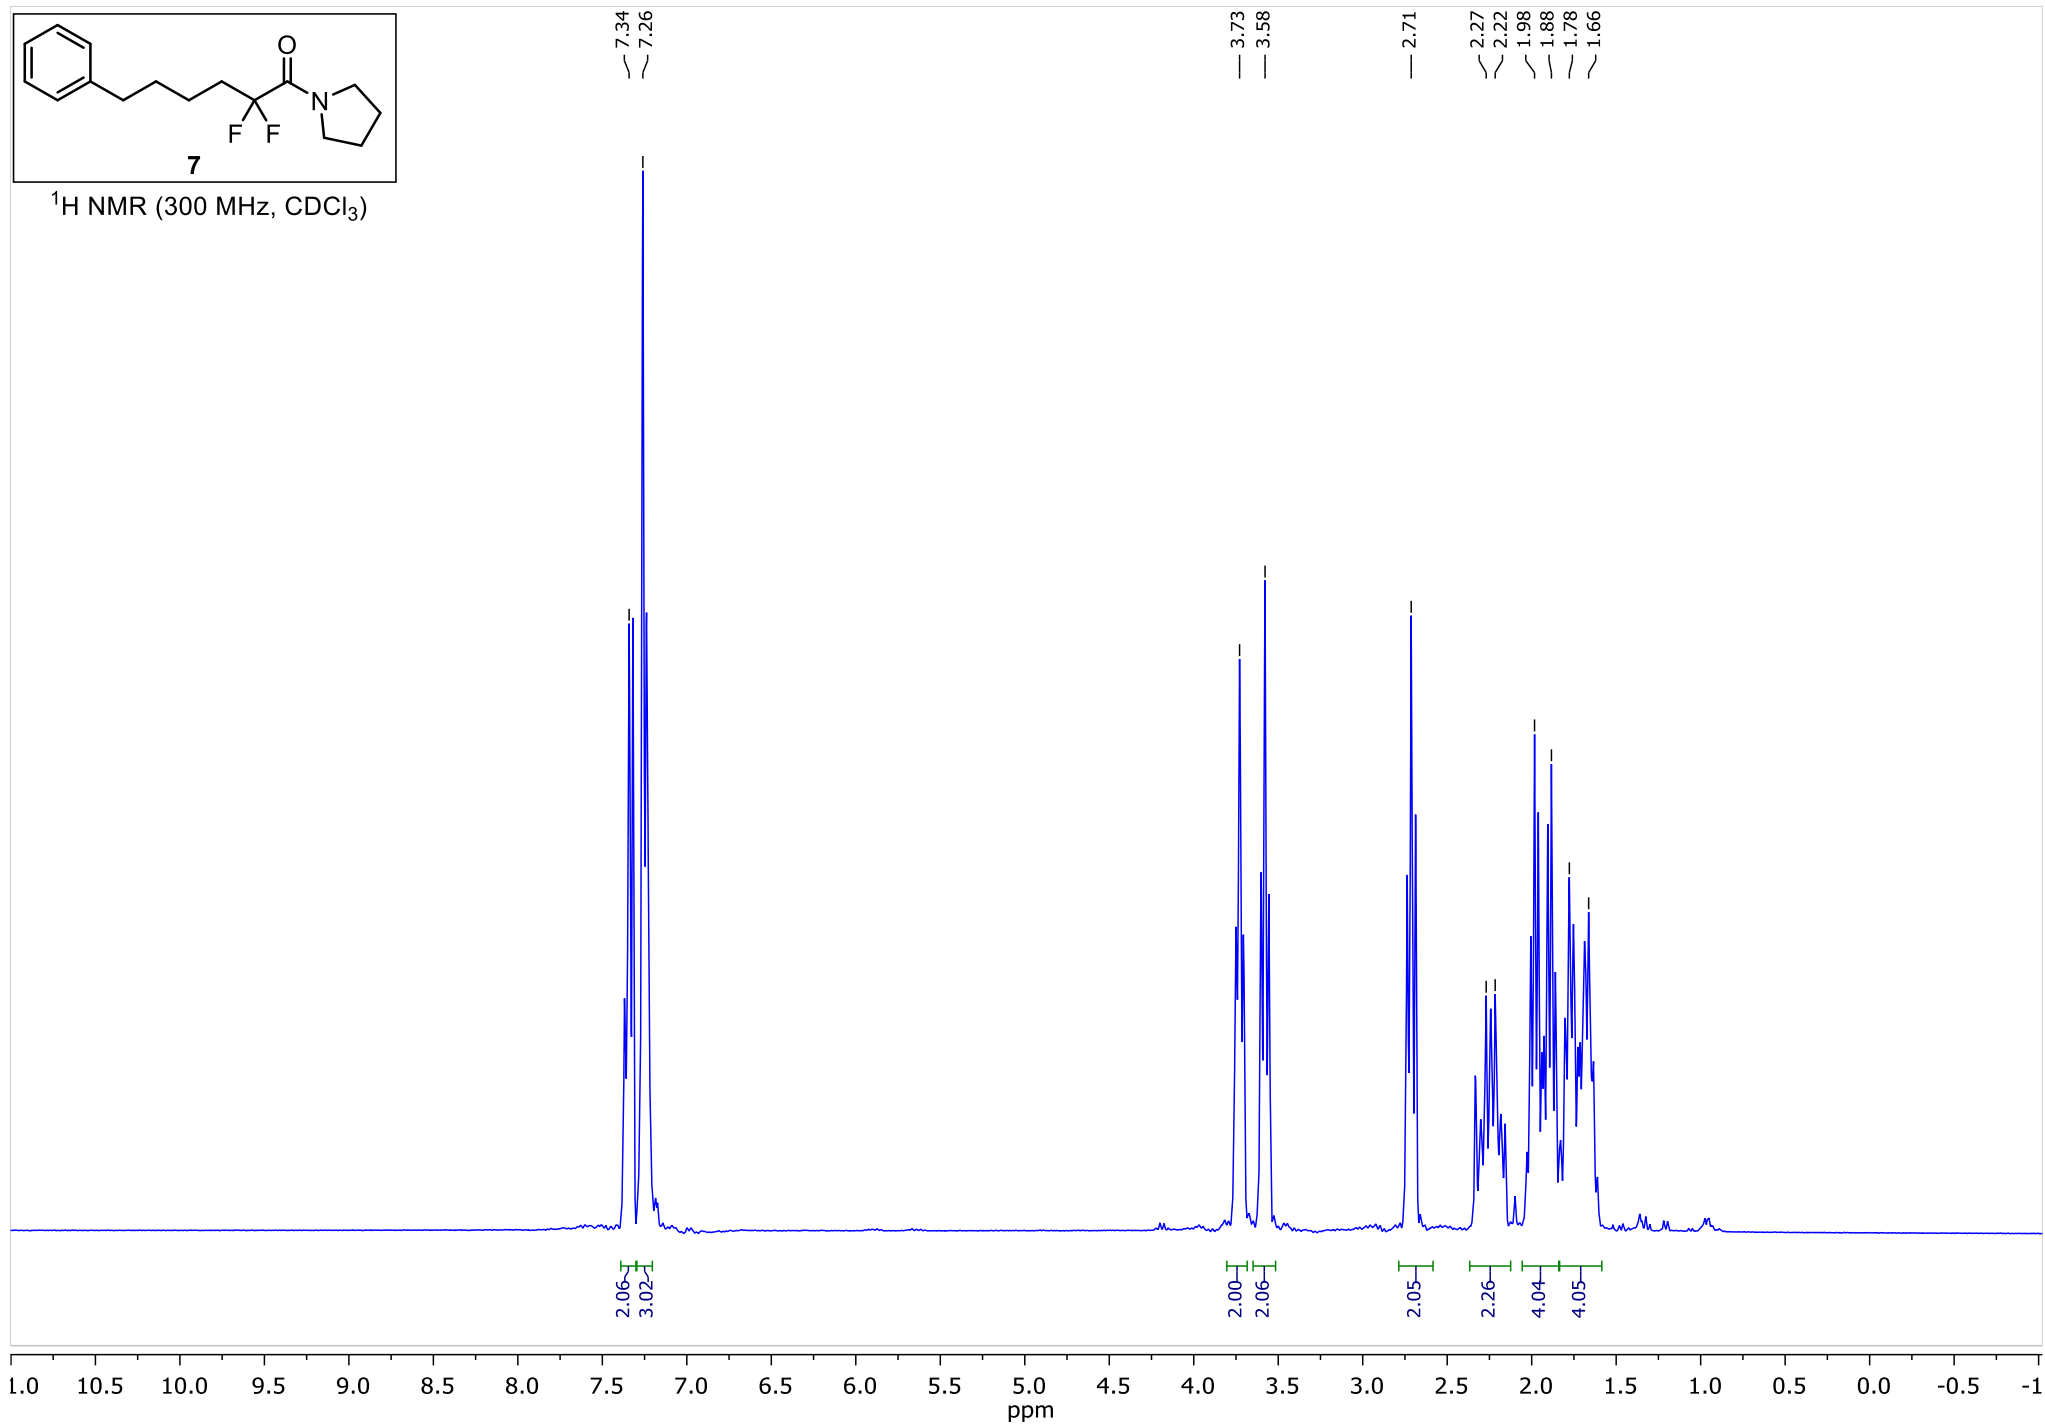

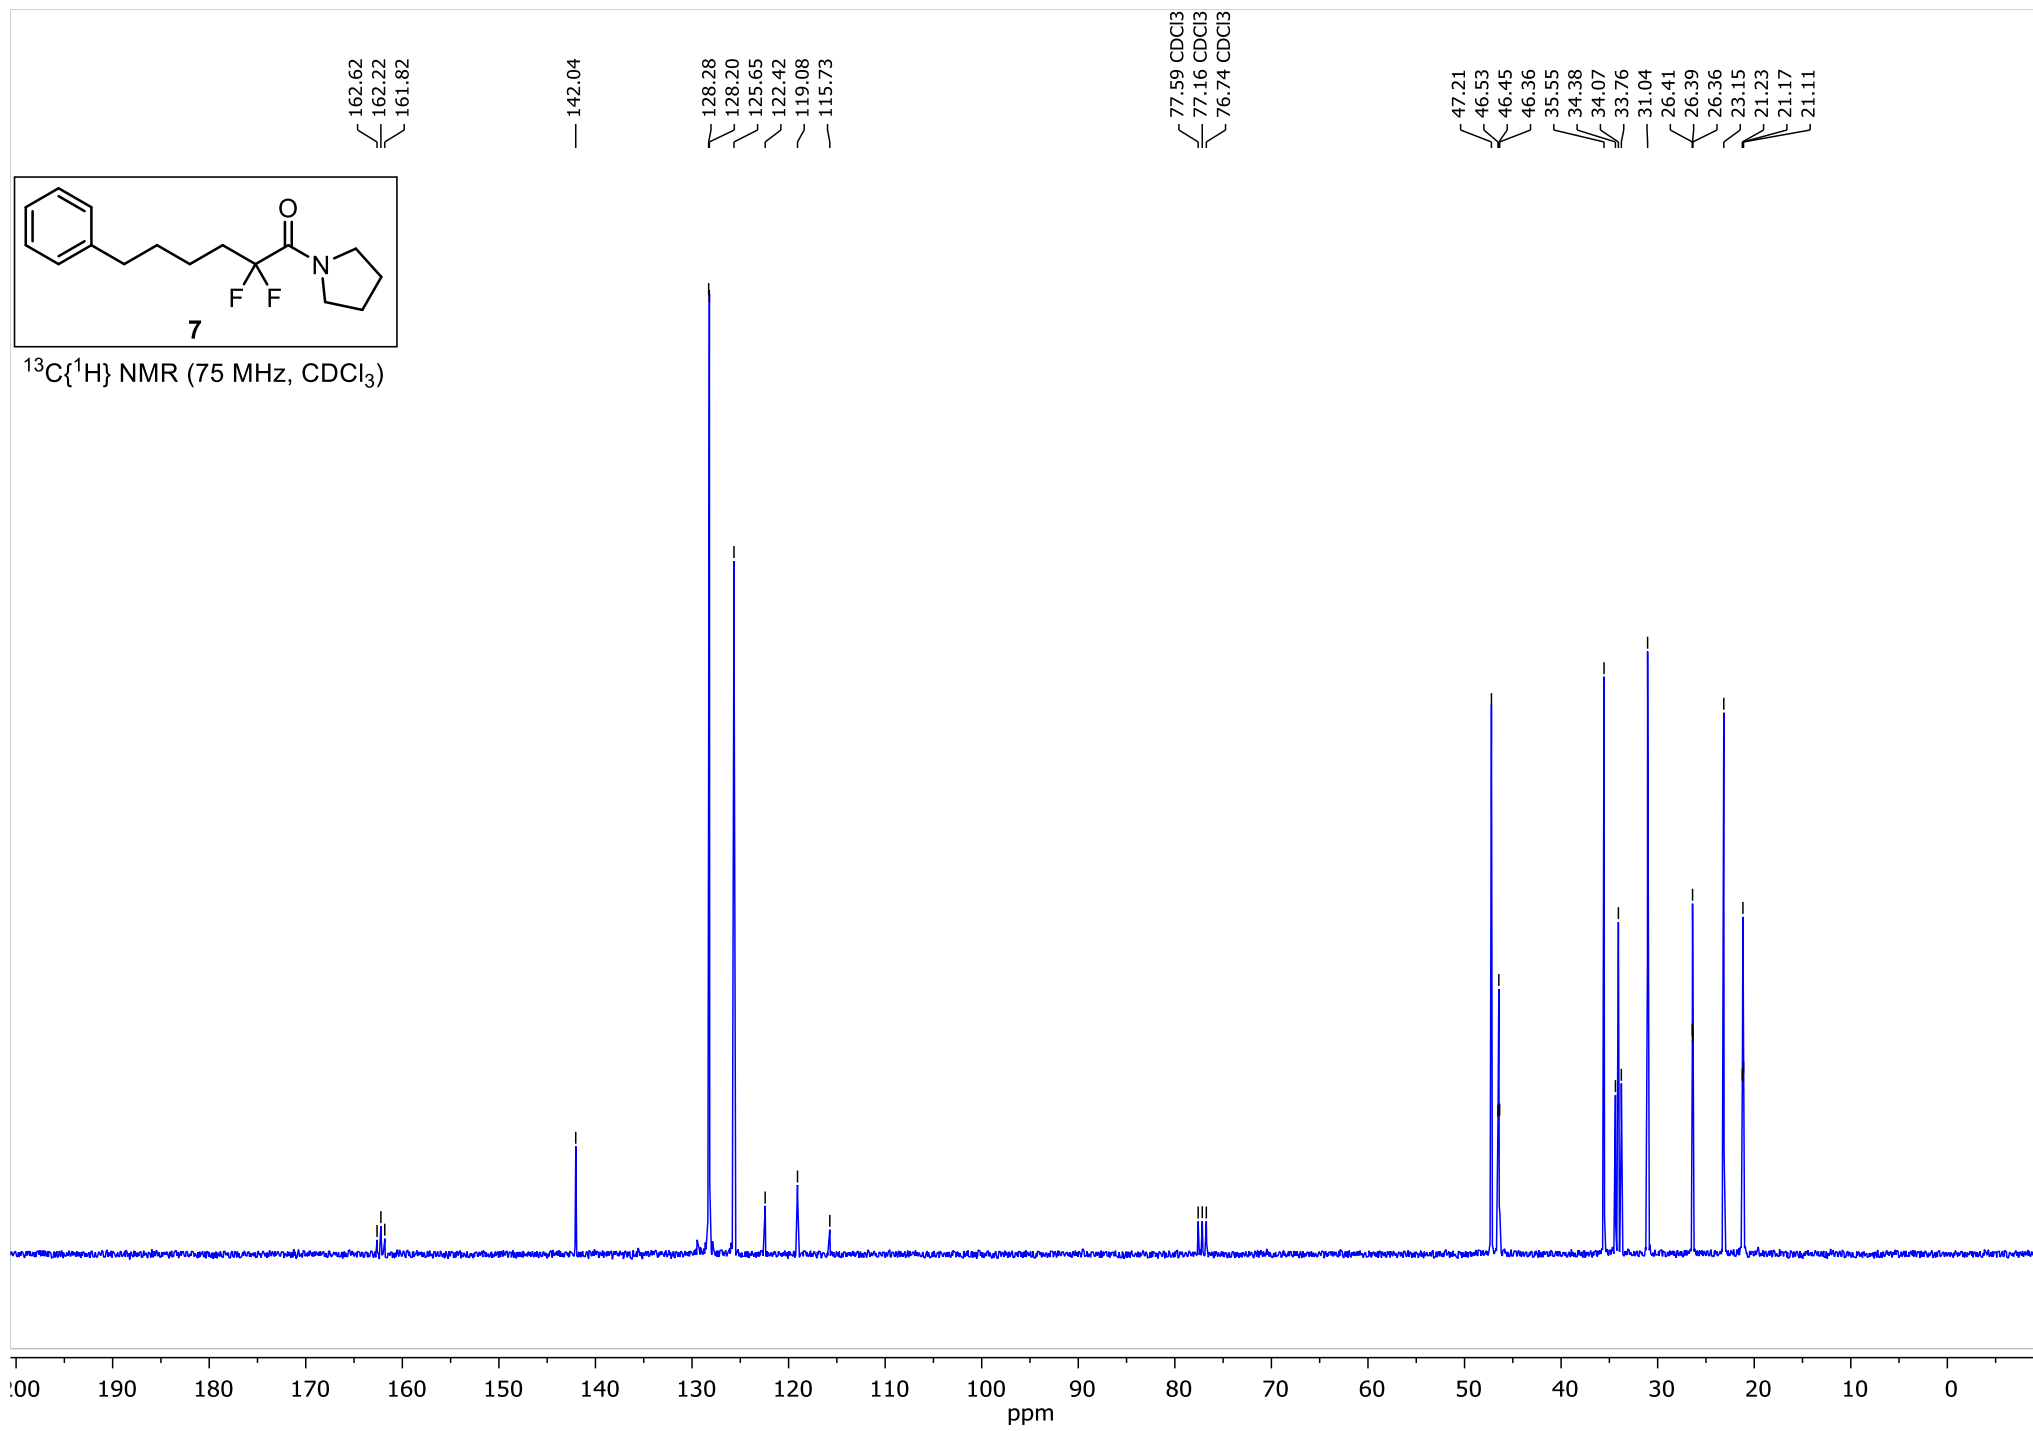

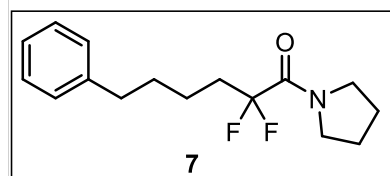

<sup>19</sup>F NMR (282 MHz, CDCl<sub>3</sub>)

-103.85  
-103.92  
-103.98

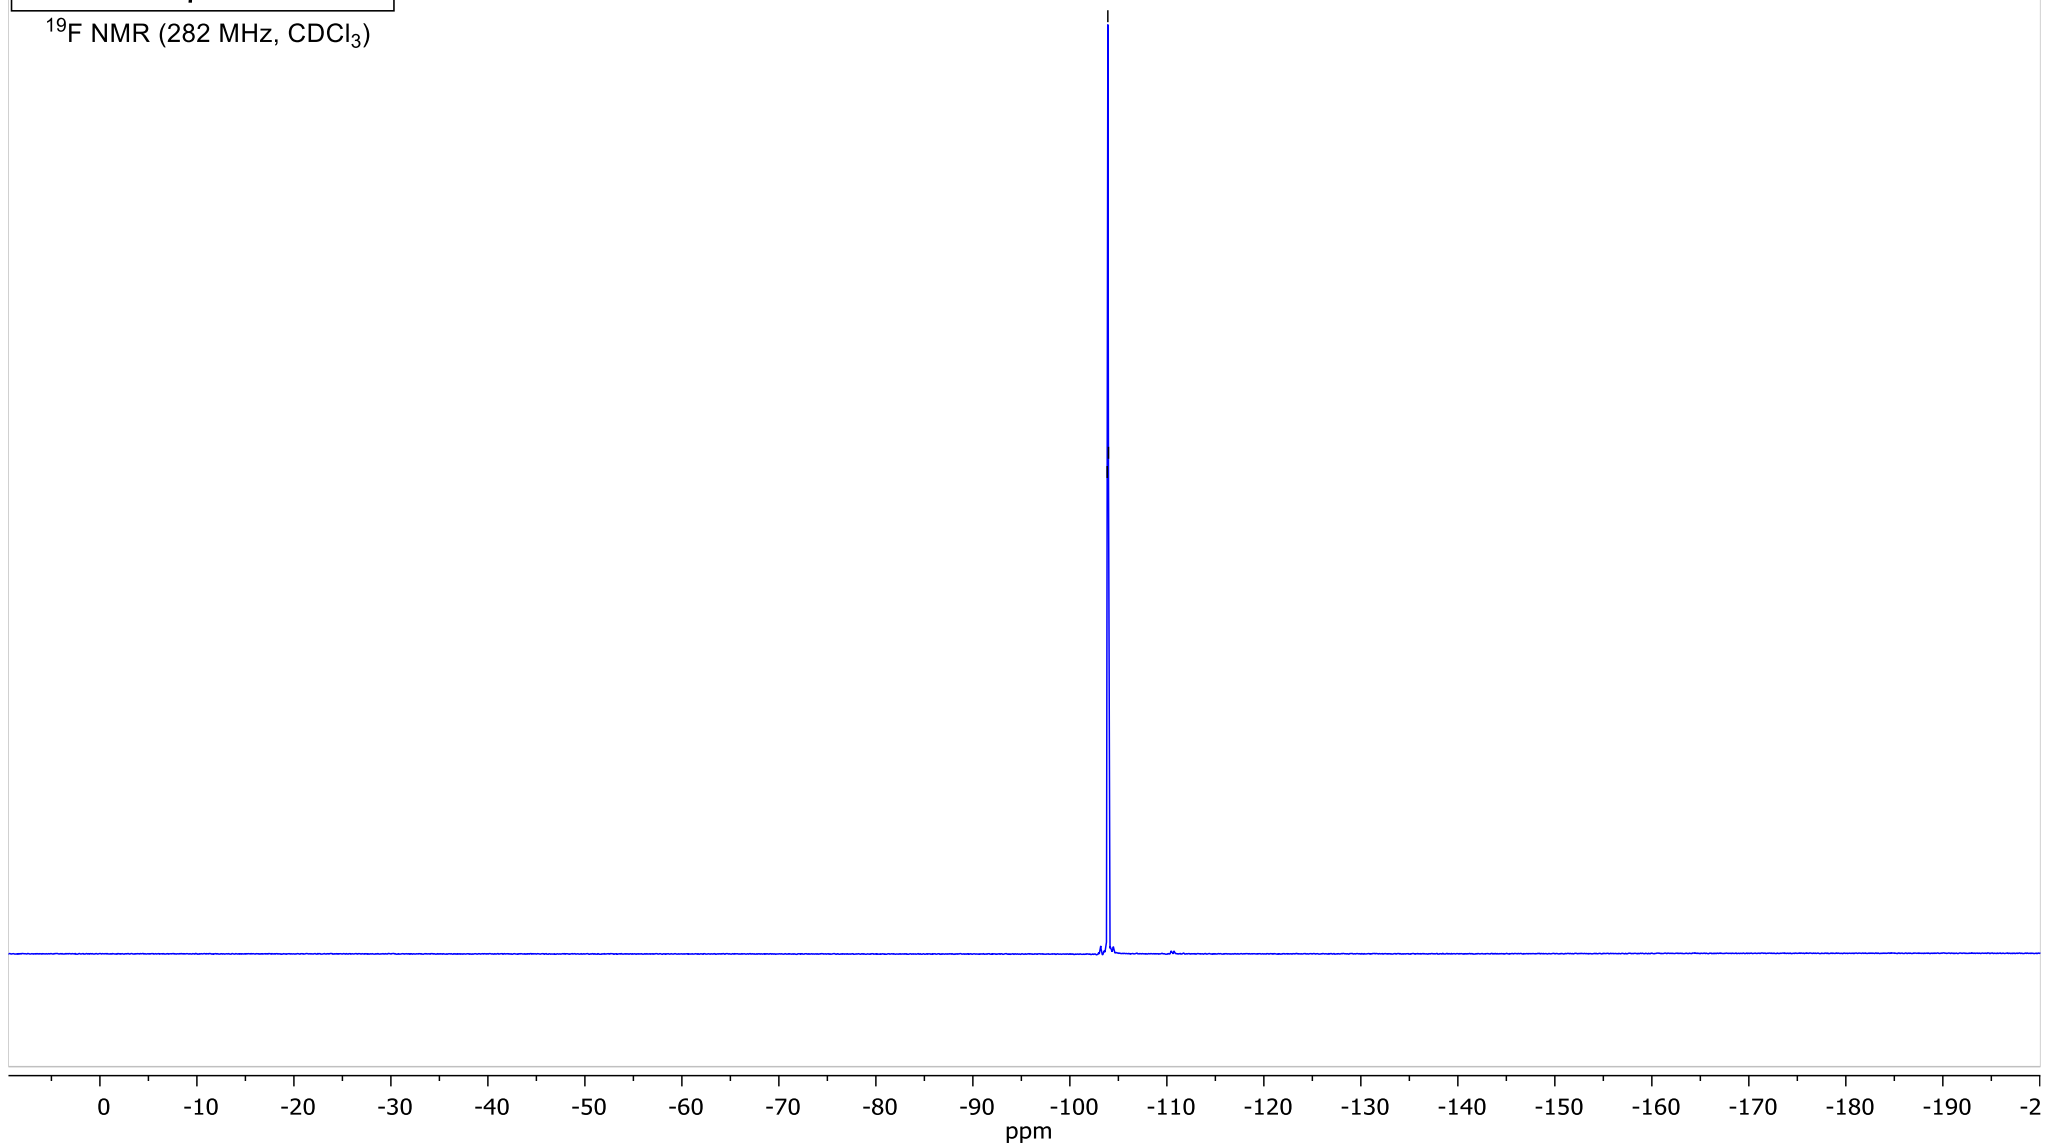

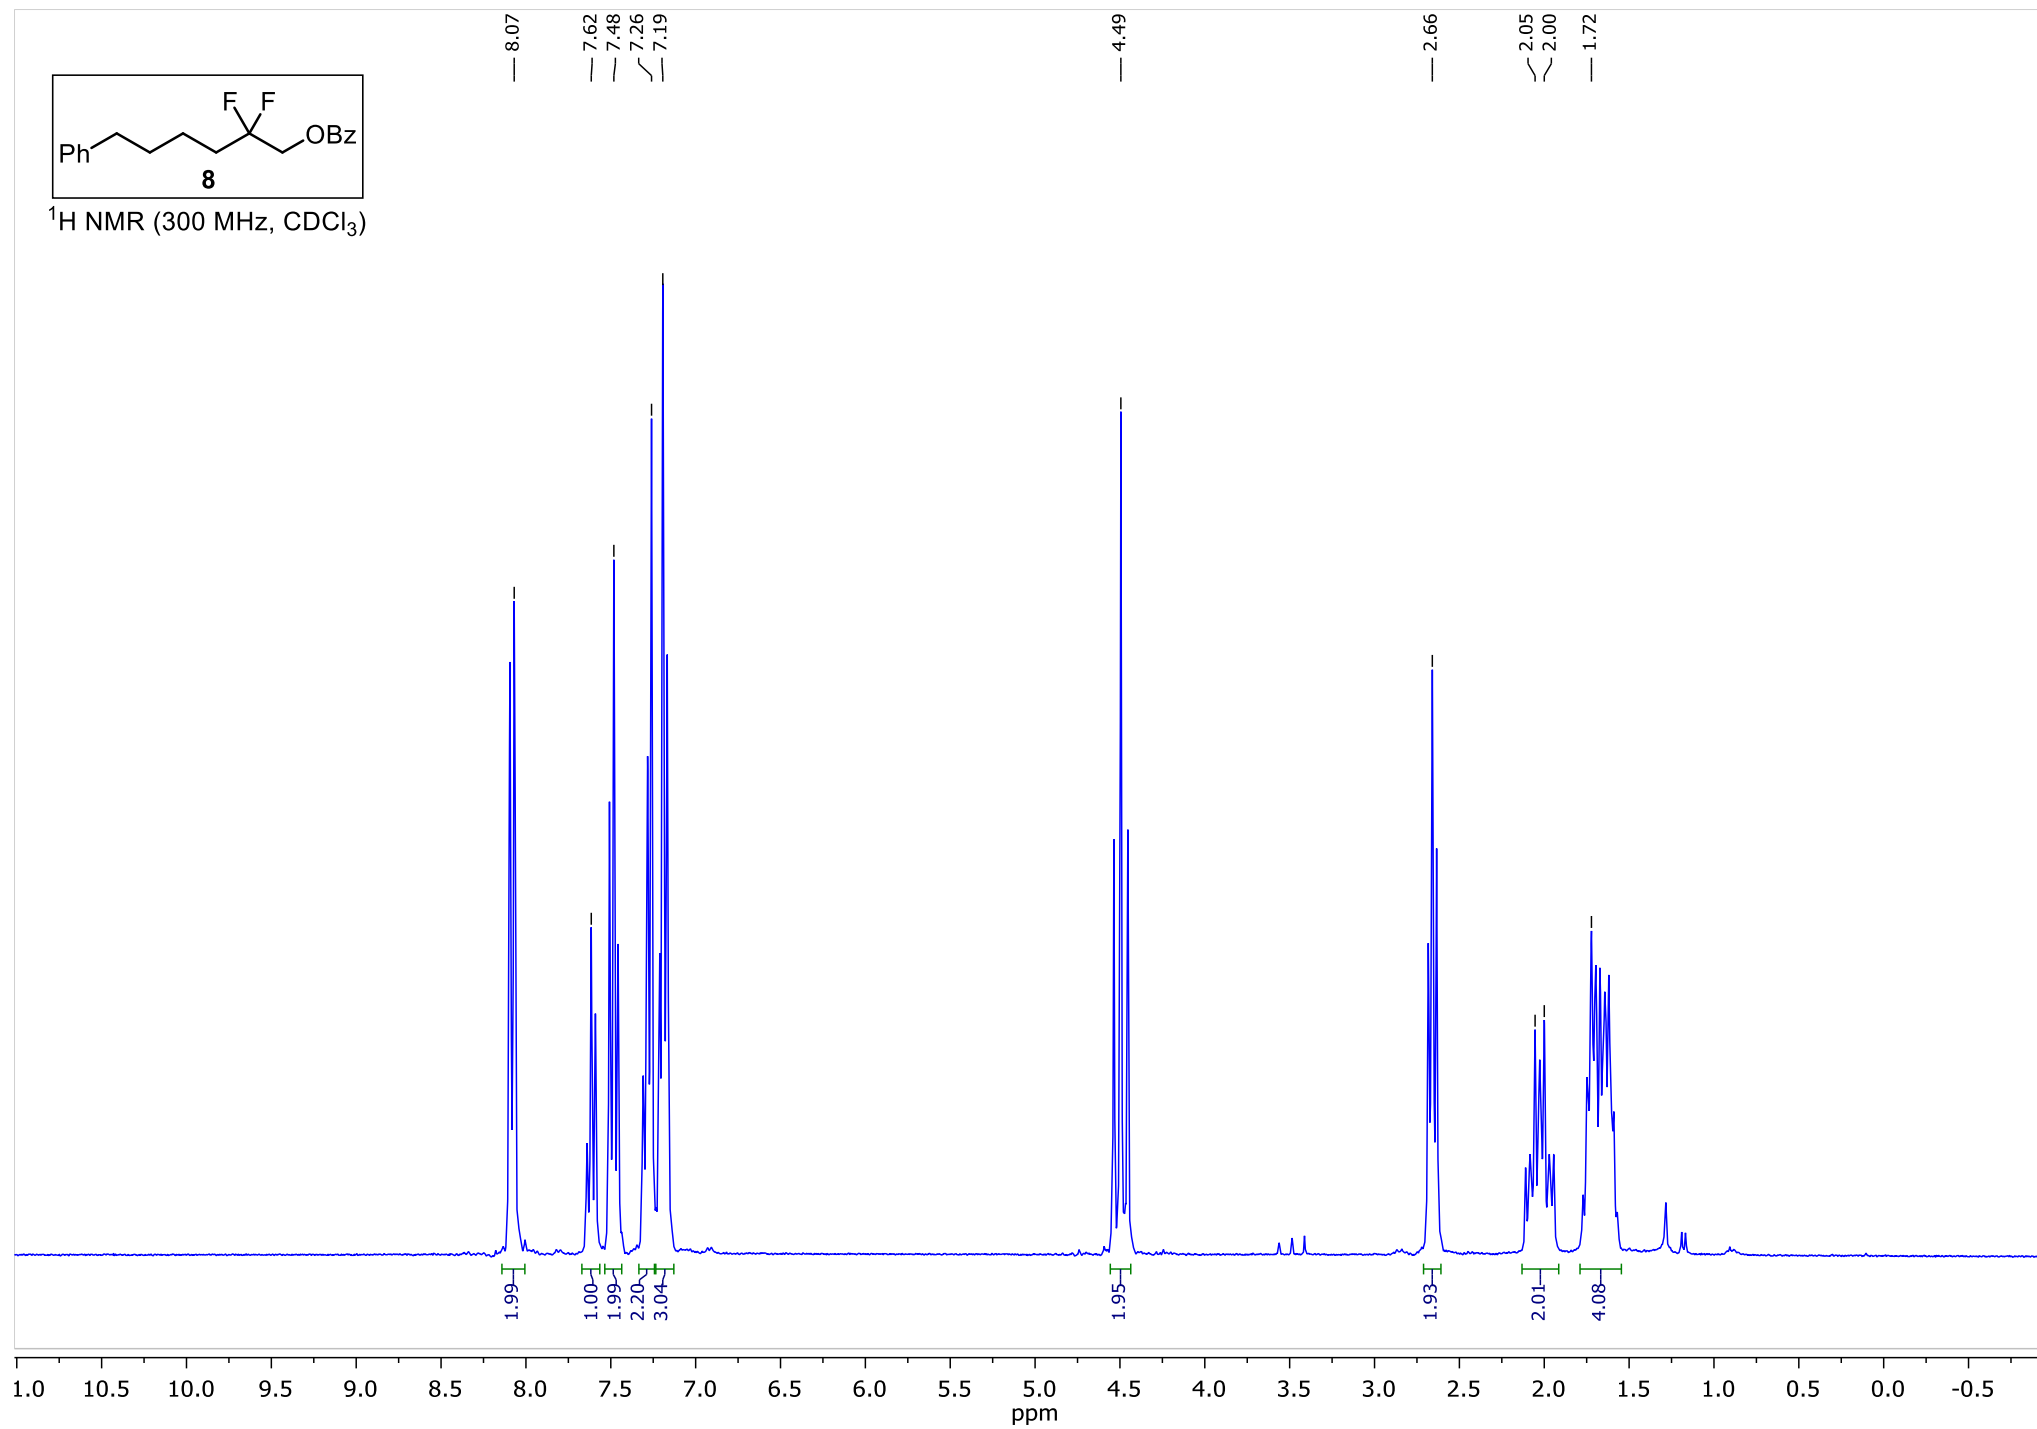

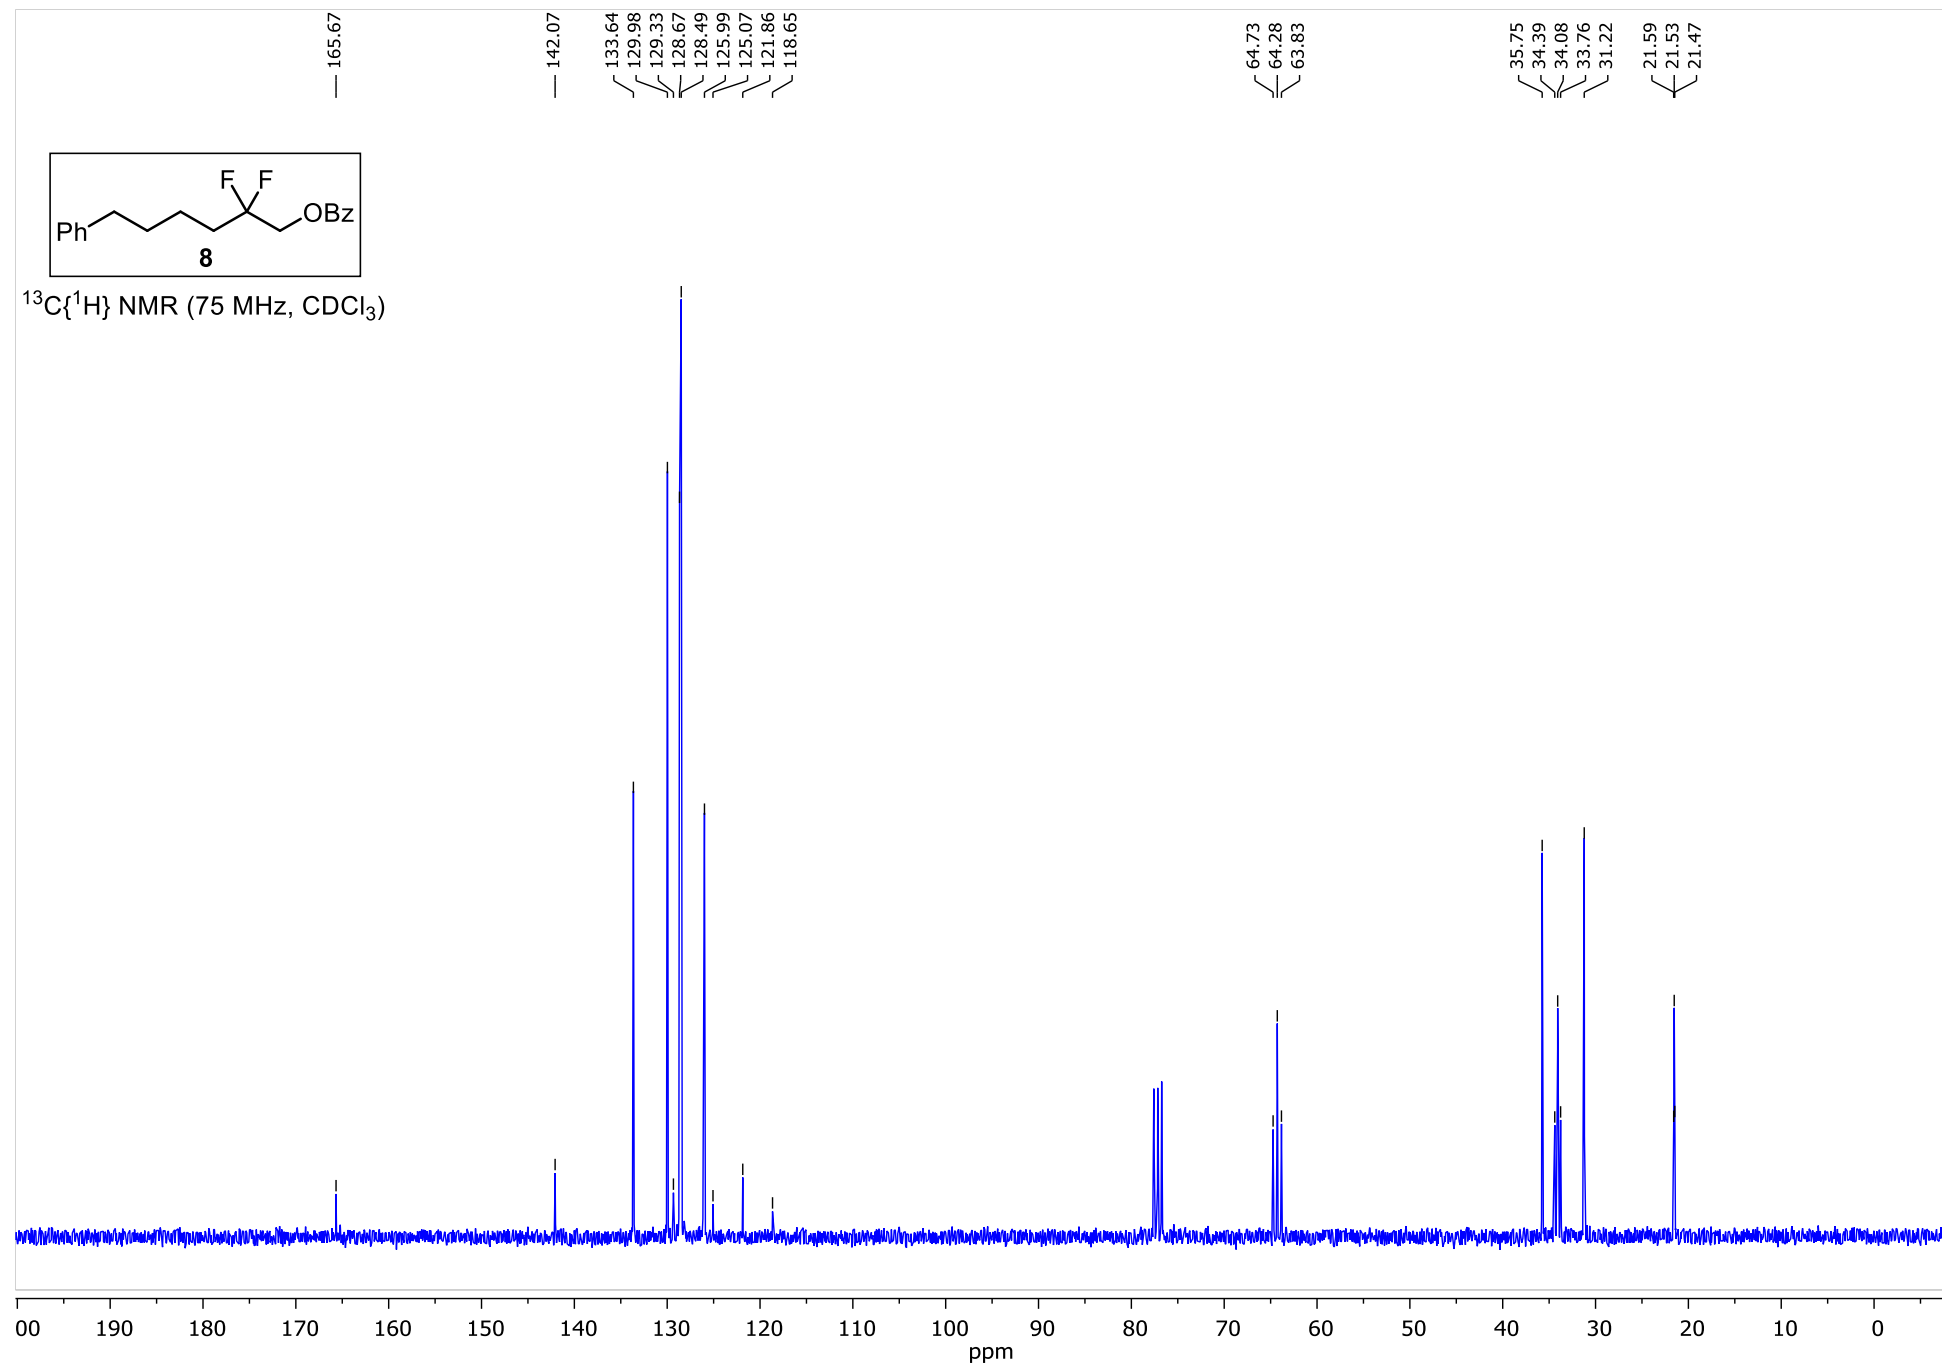



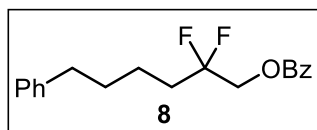

$^{19}\text{F}$  NMR (282 MHz,  $\text{CDCl}_3$ )

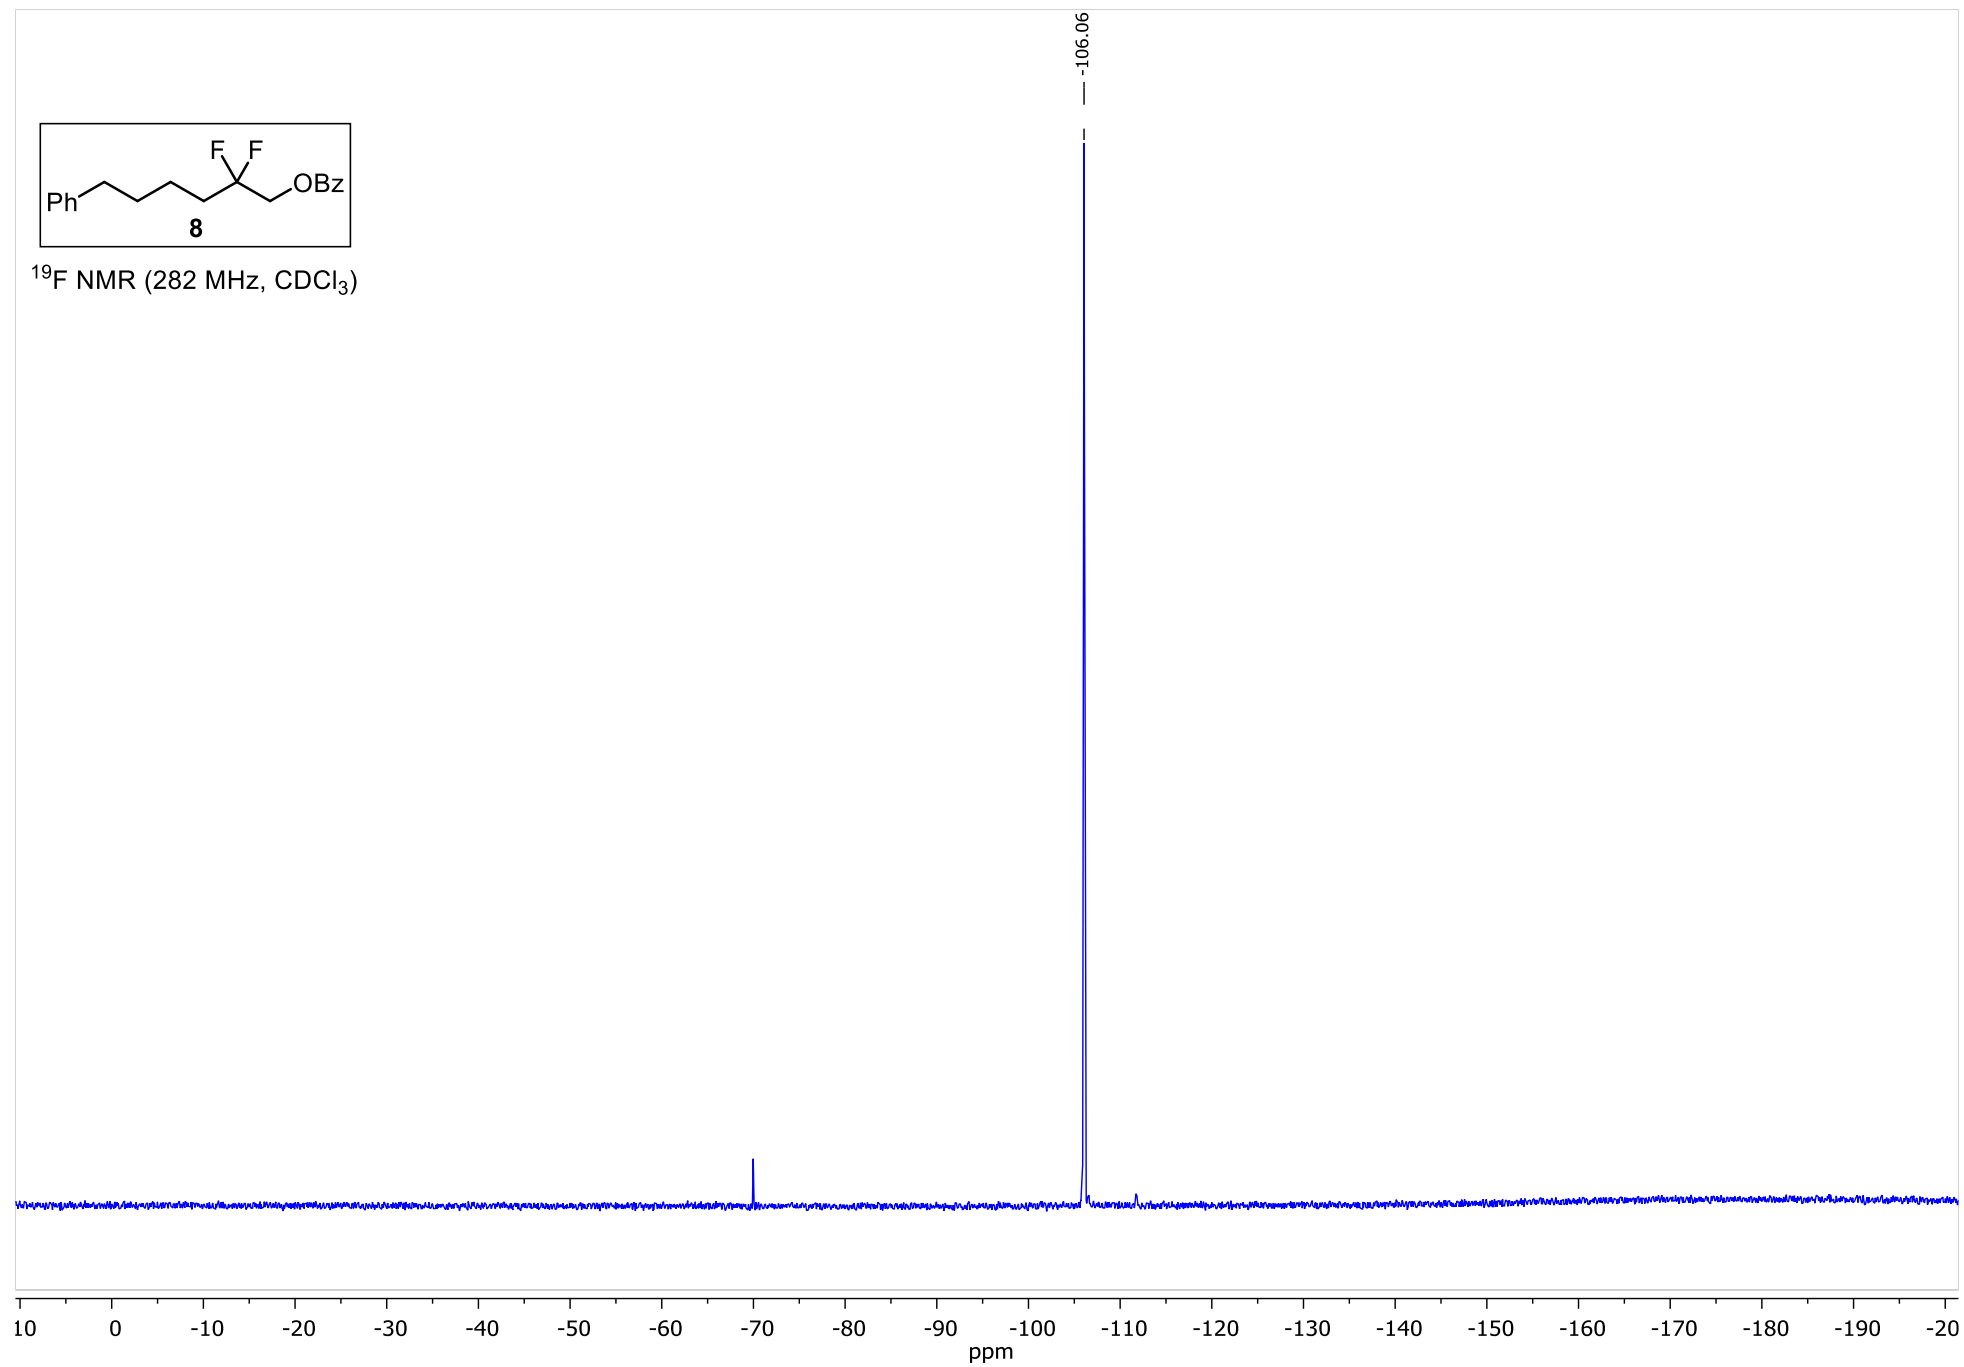

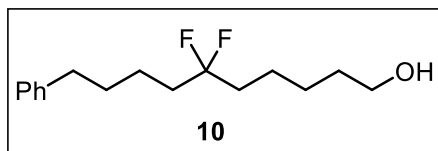

$^1\text{H}$  NMR (300 MHz,  $\text{CDCl}_3$ )

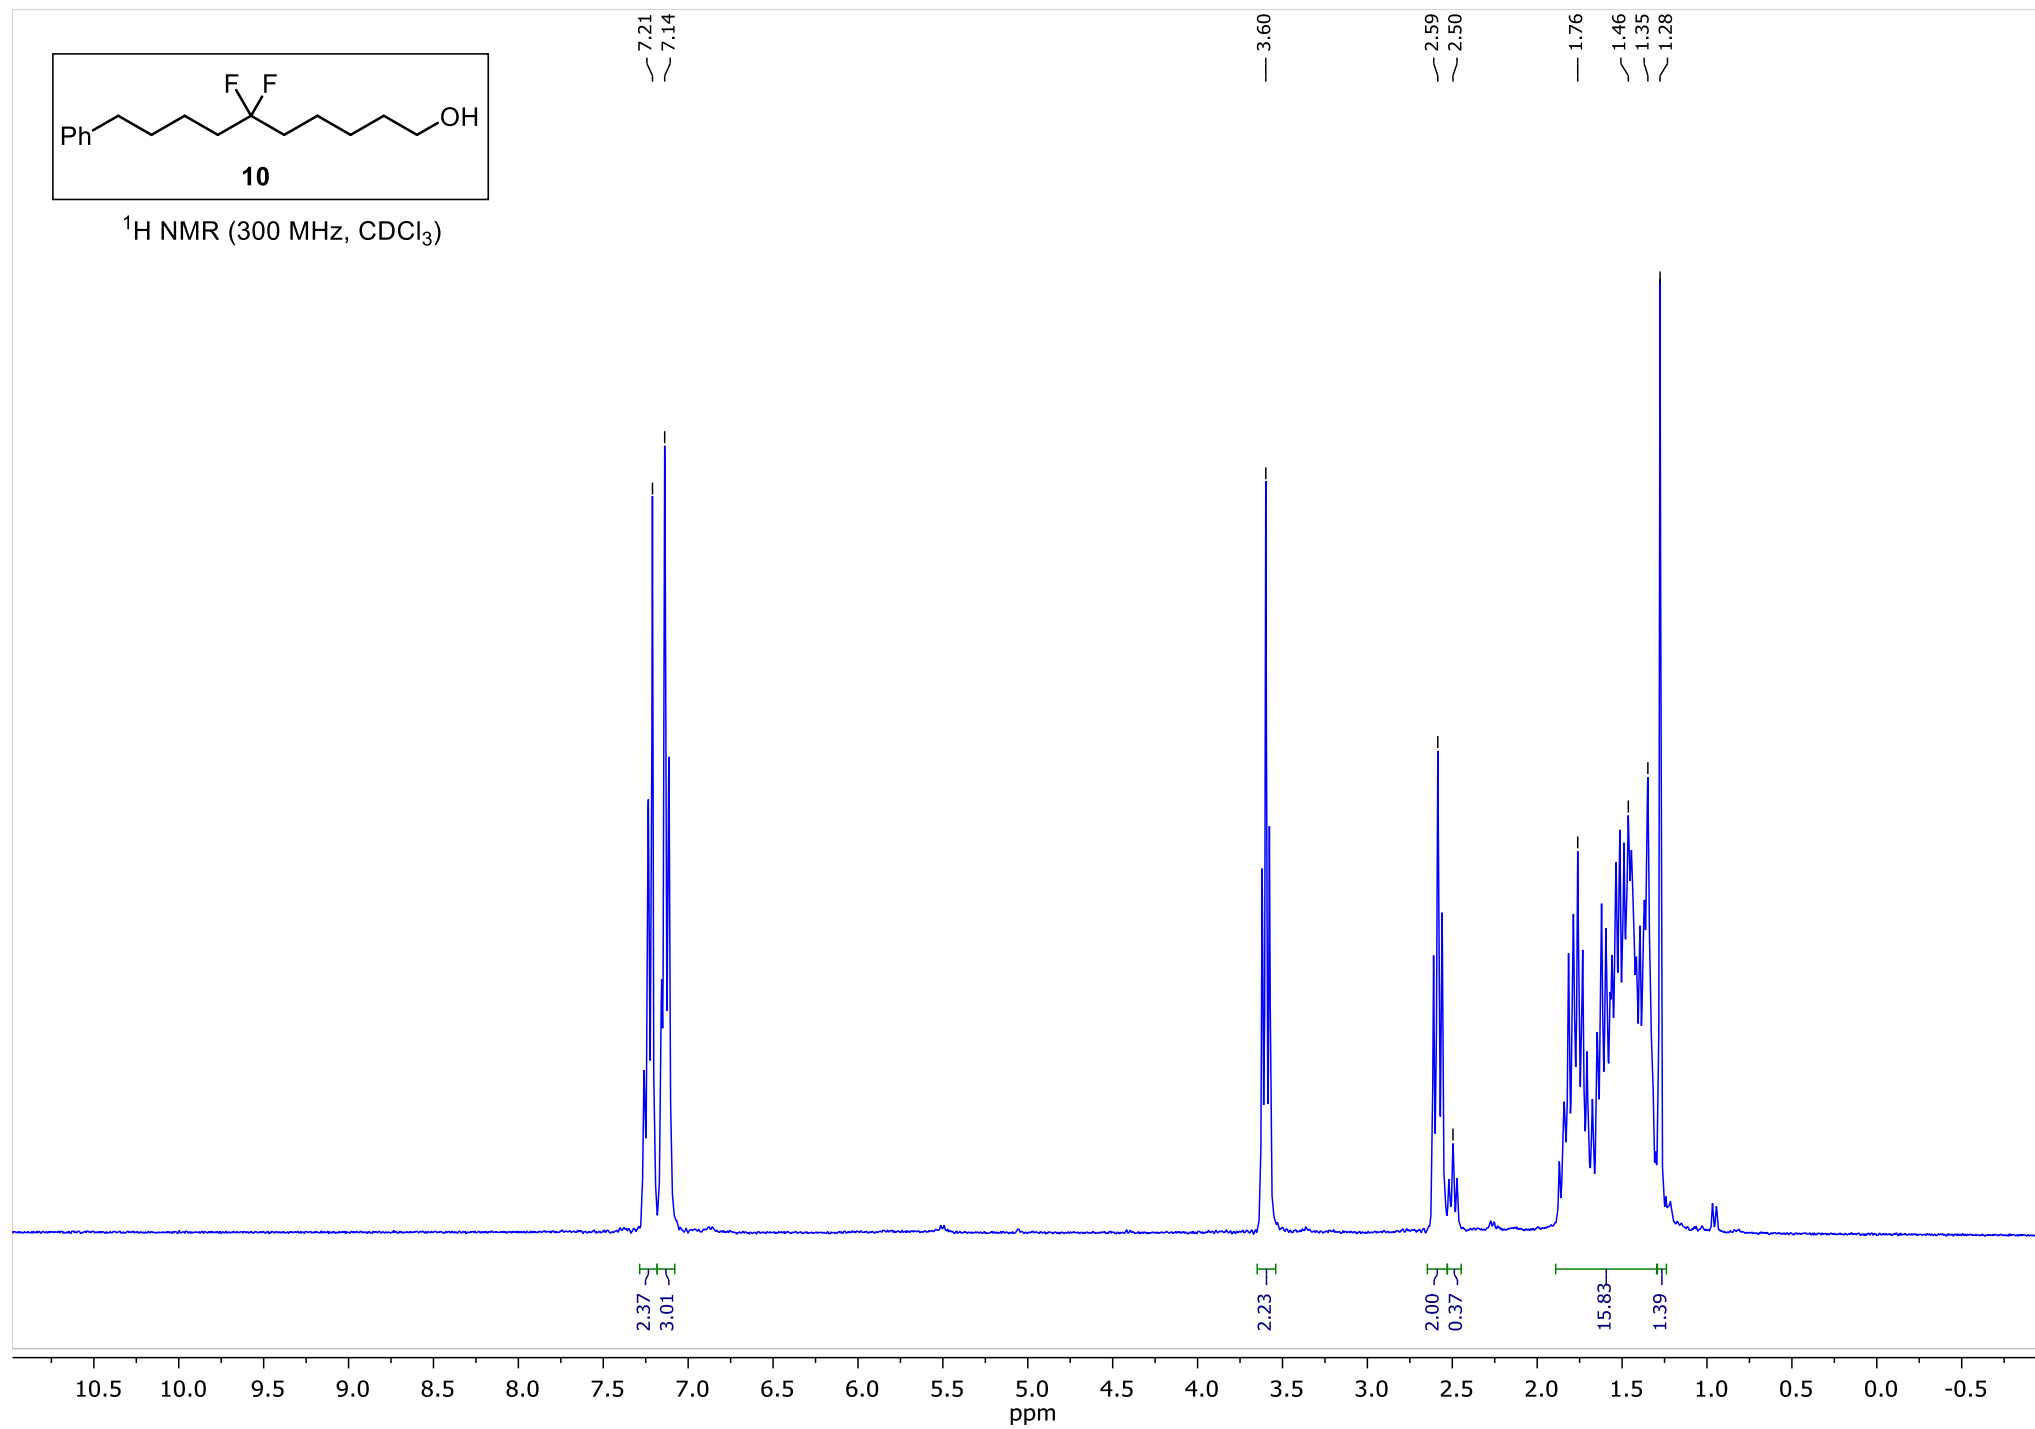

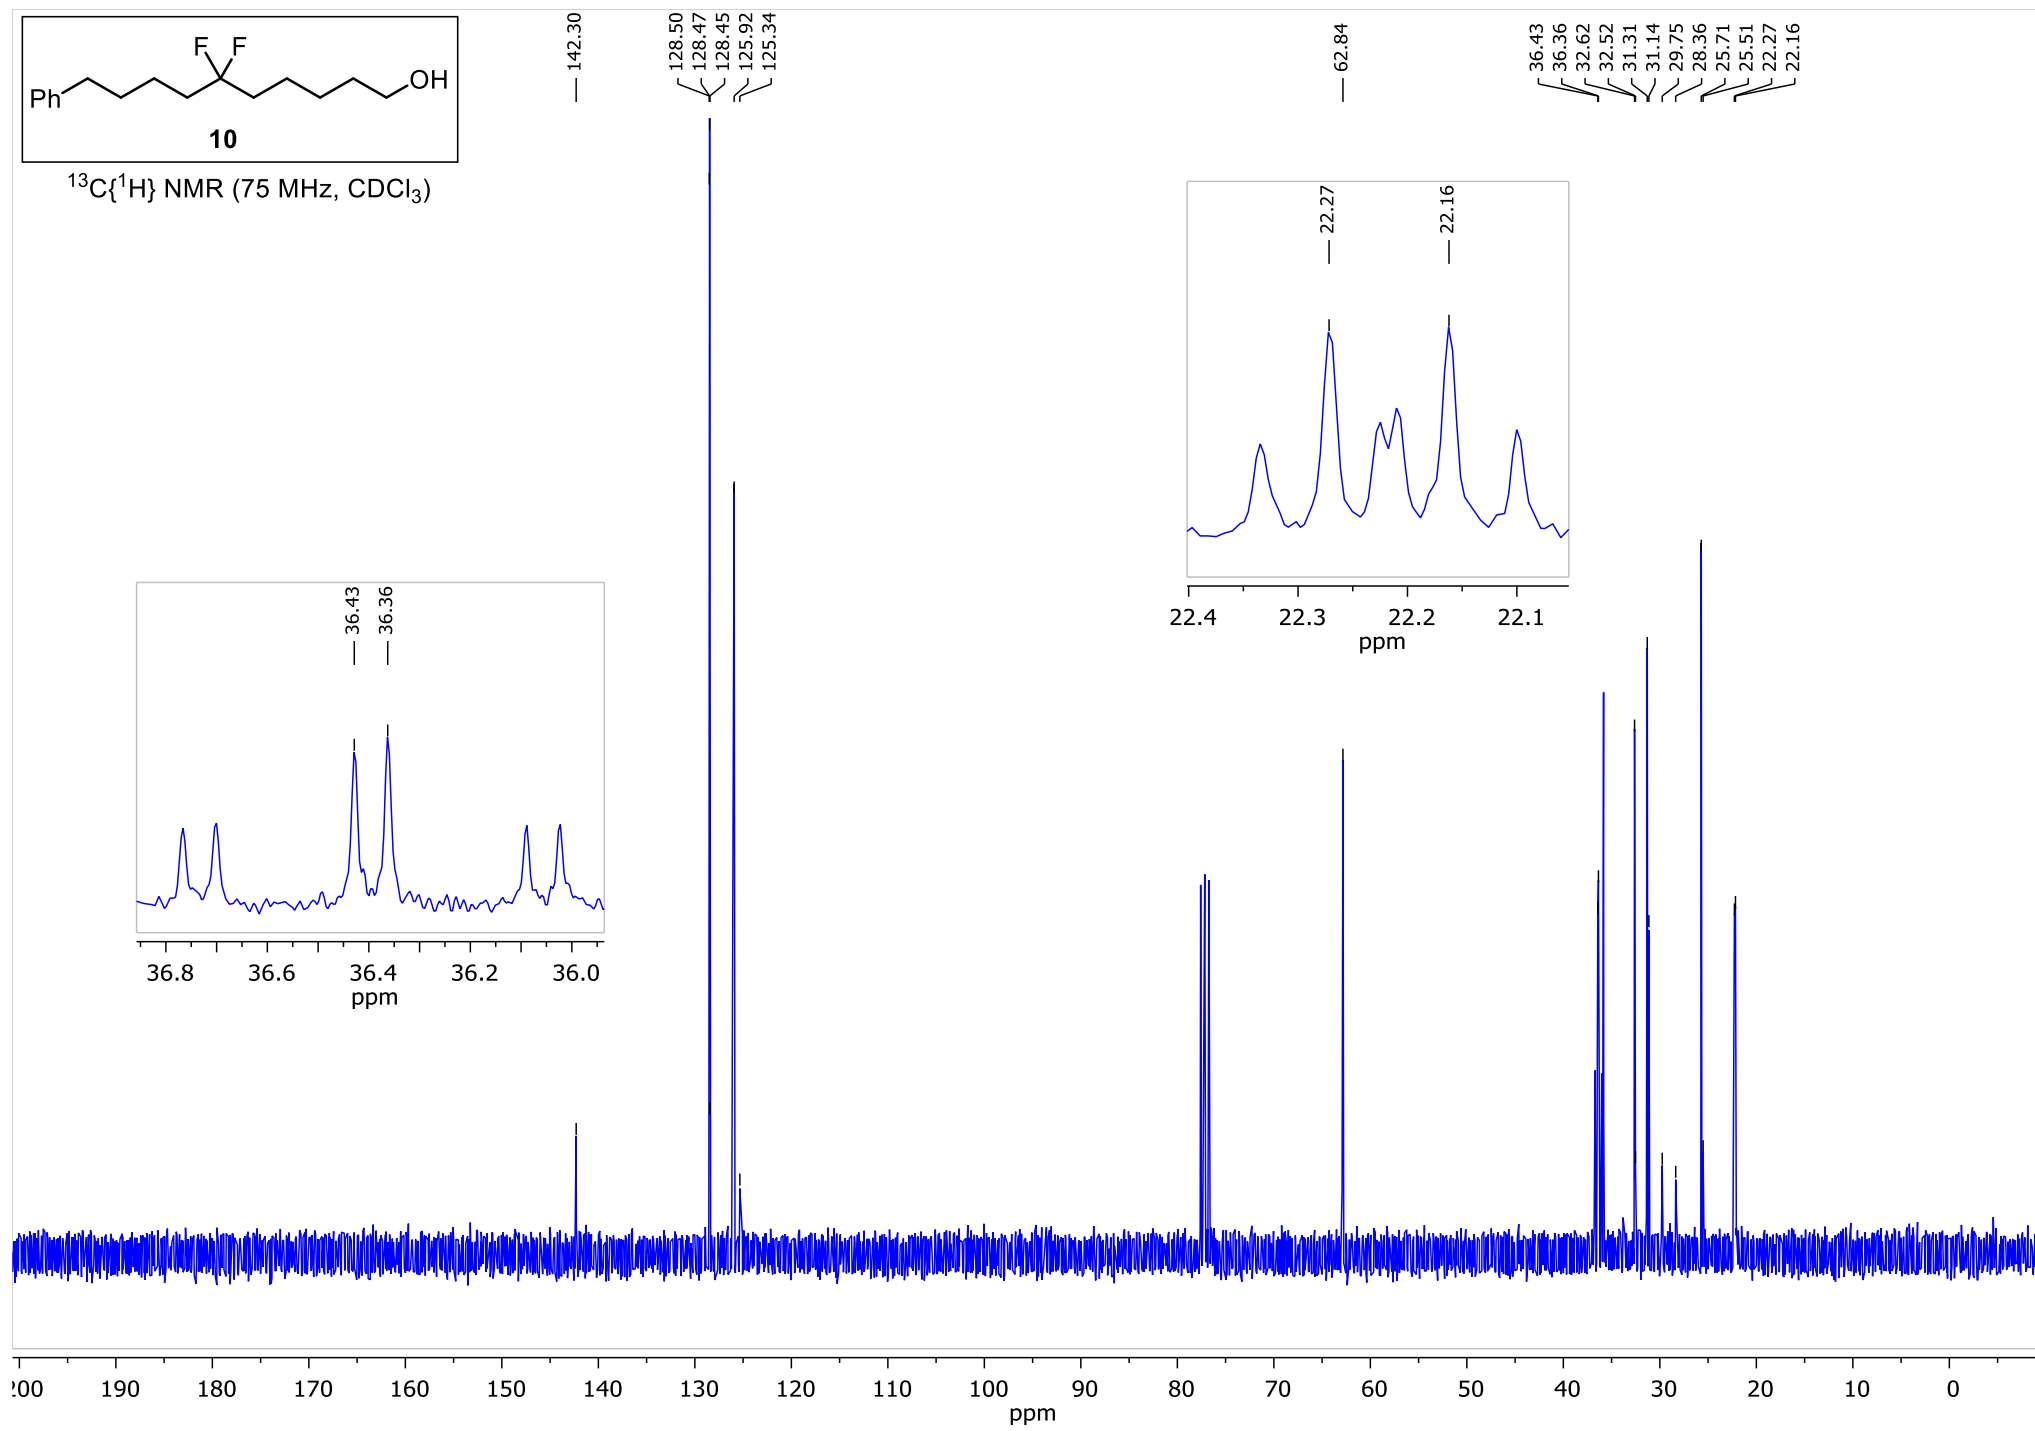

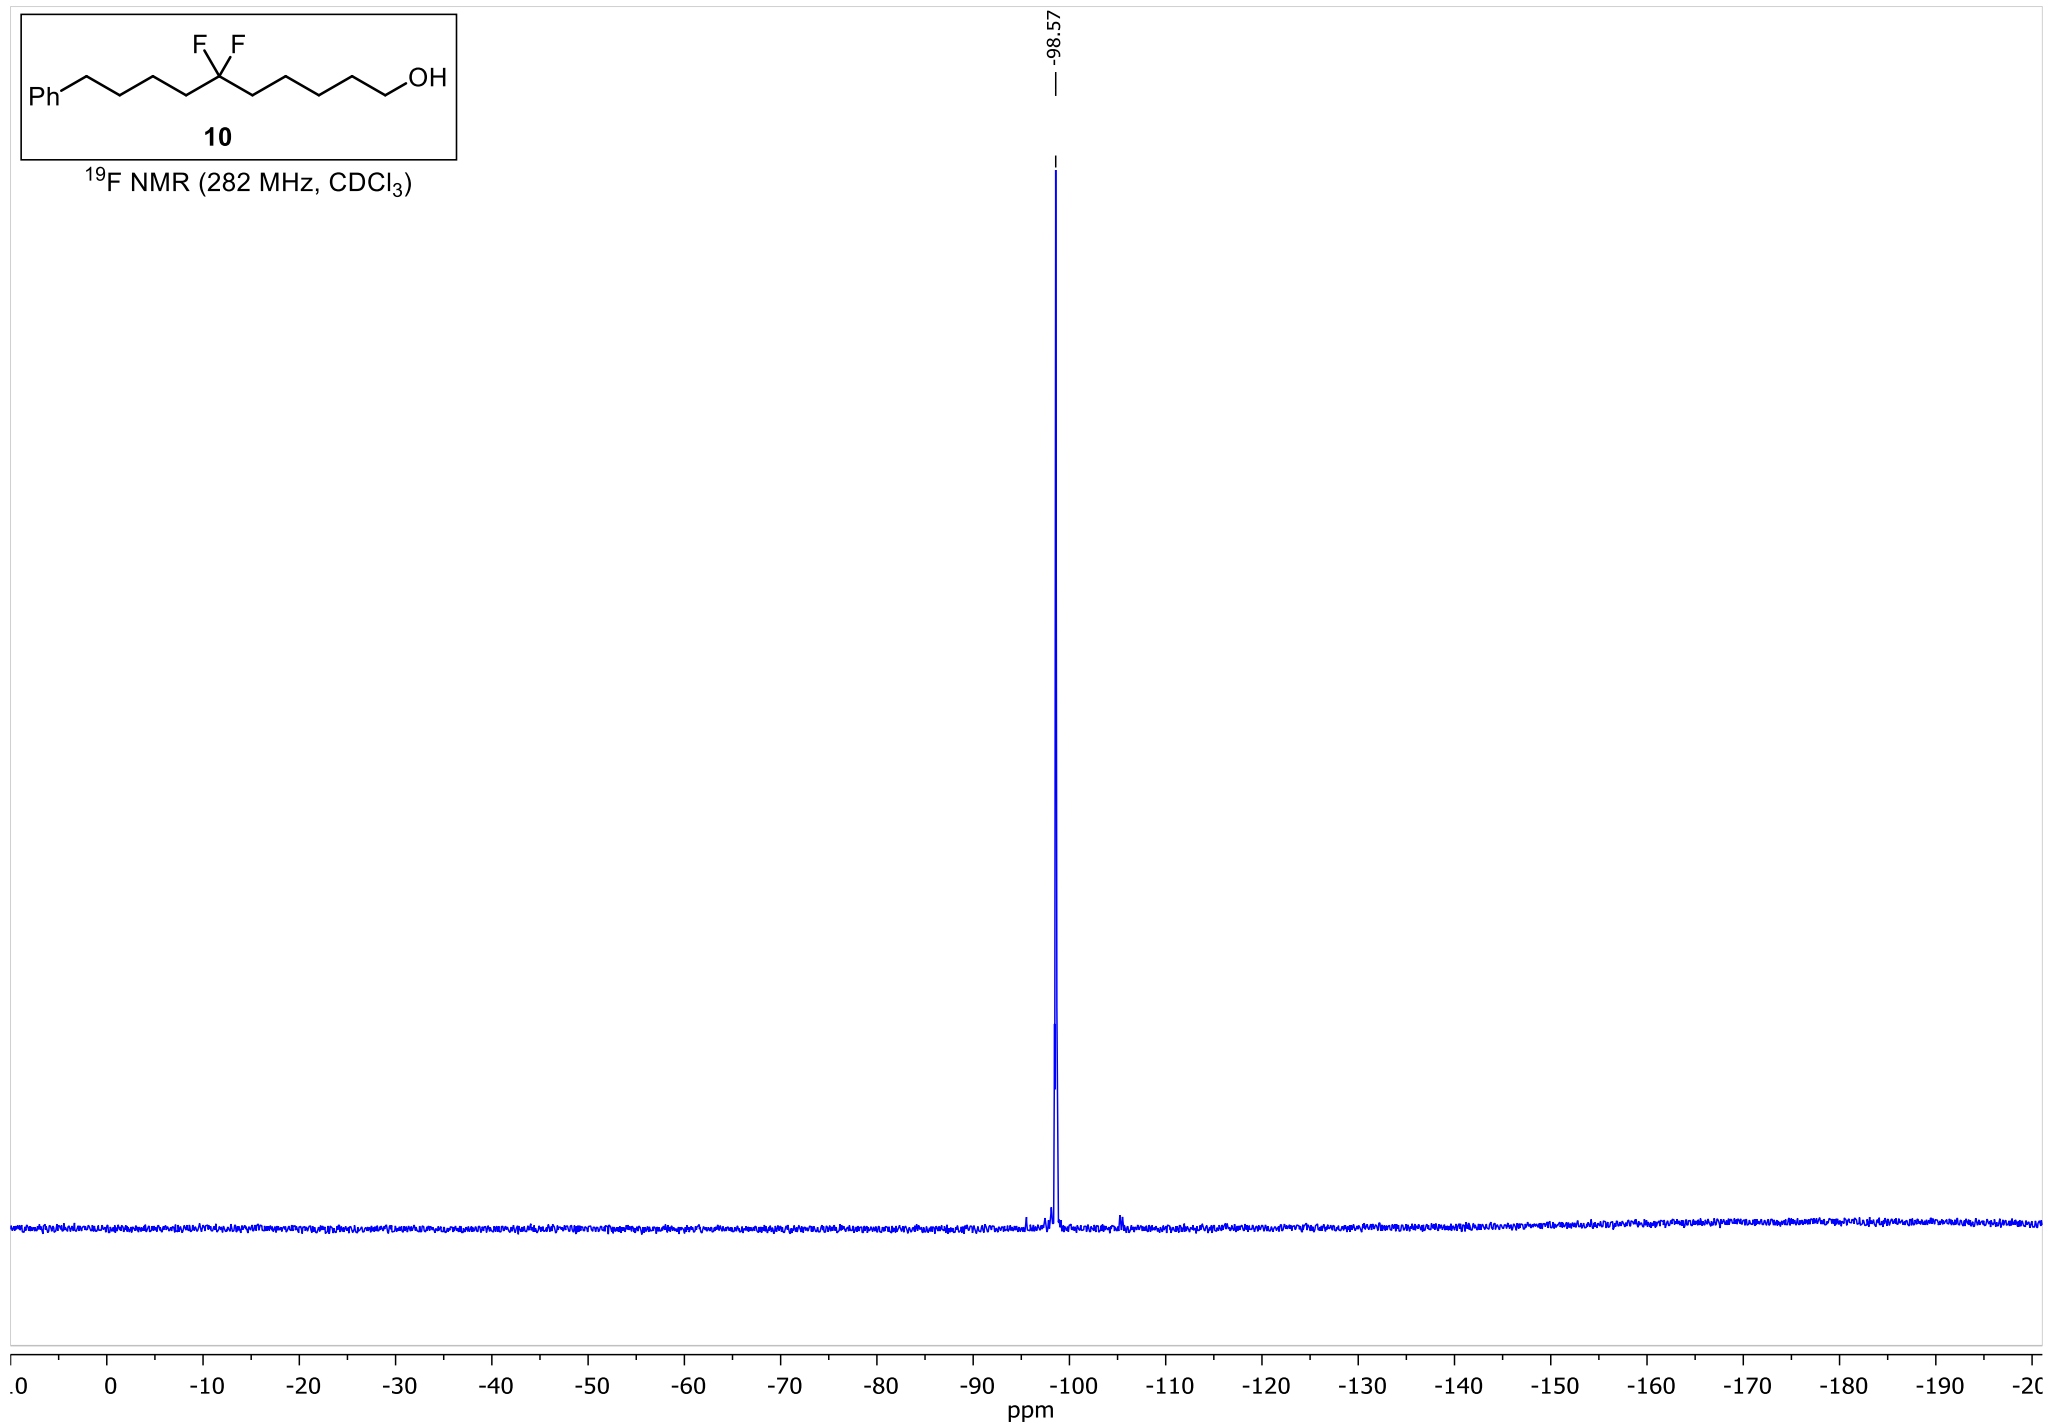

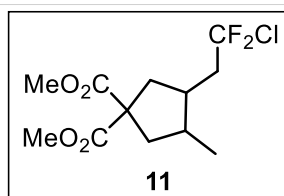

$^1\text{H}$  NMR (300 MHz,  $\text{CDCl}_3$ )

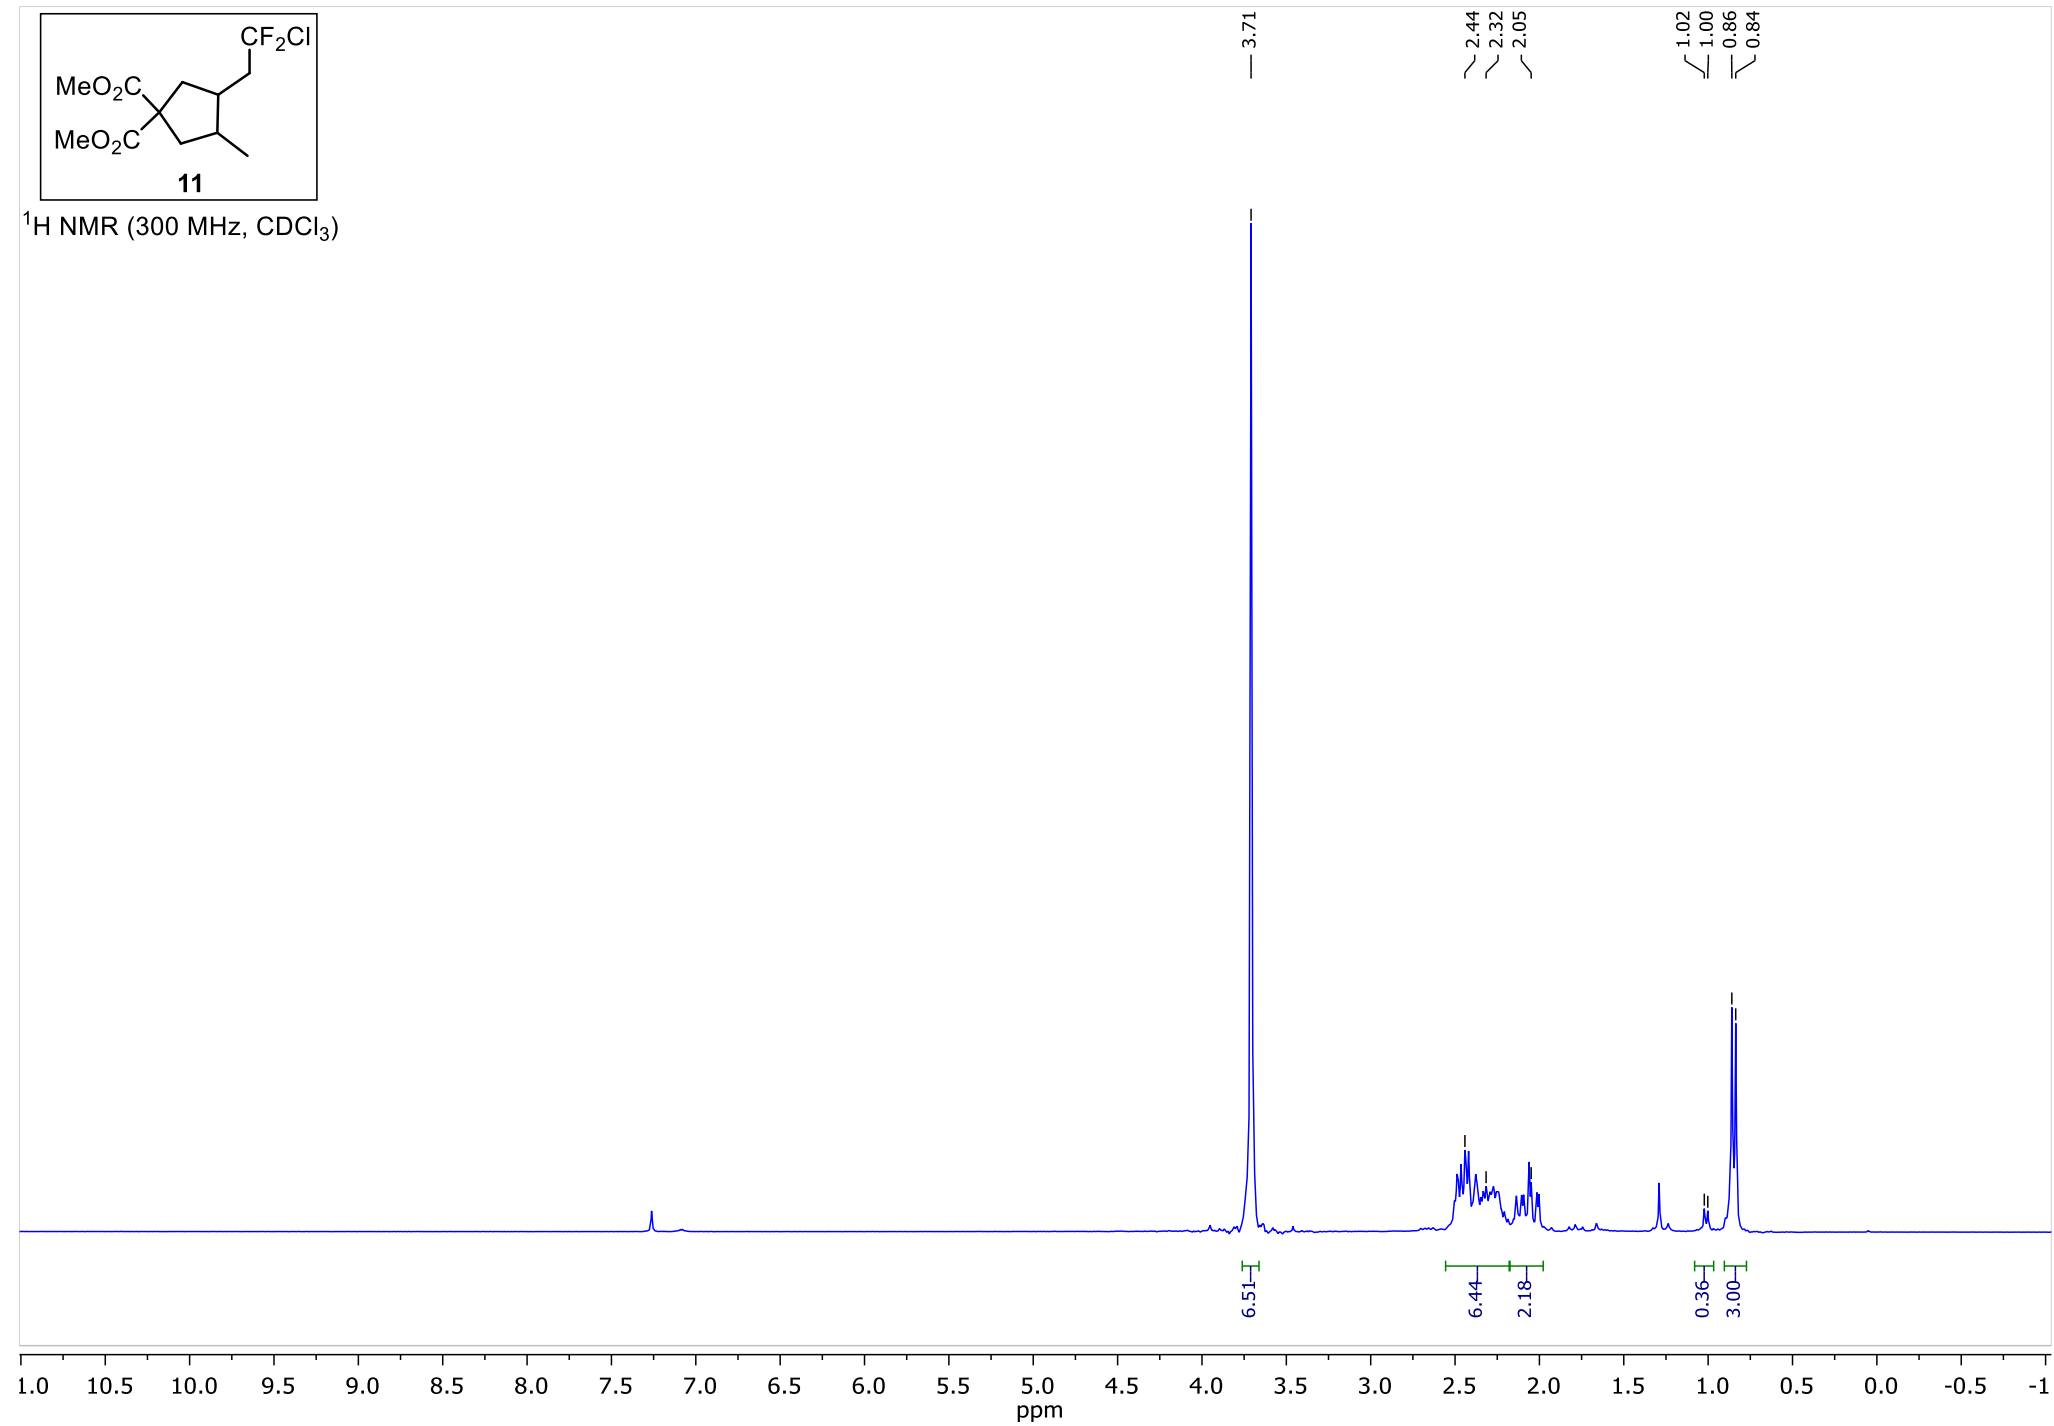

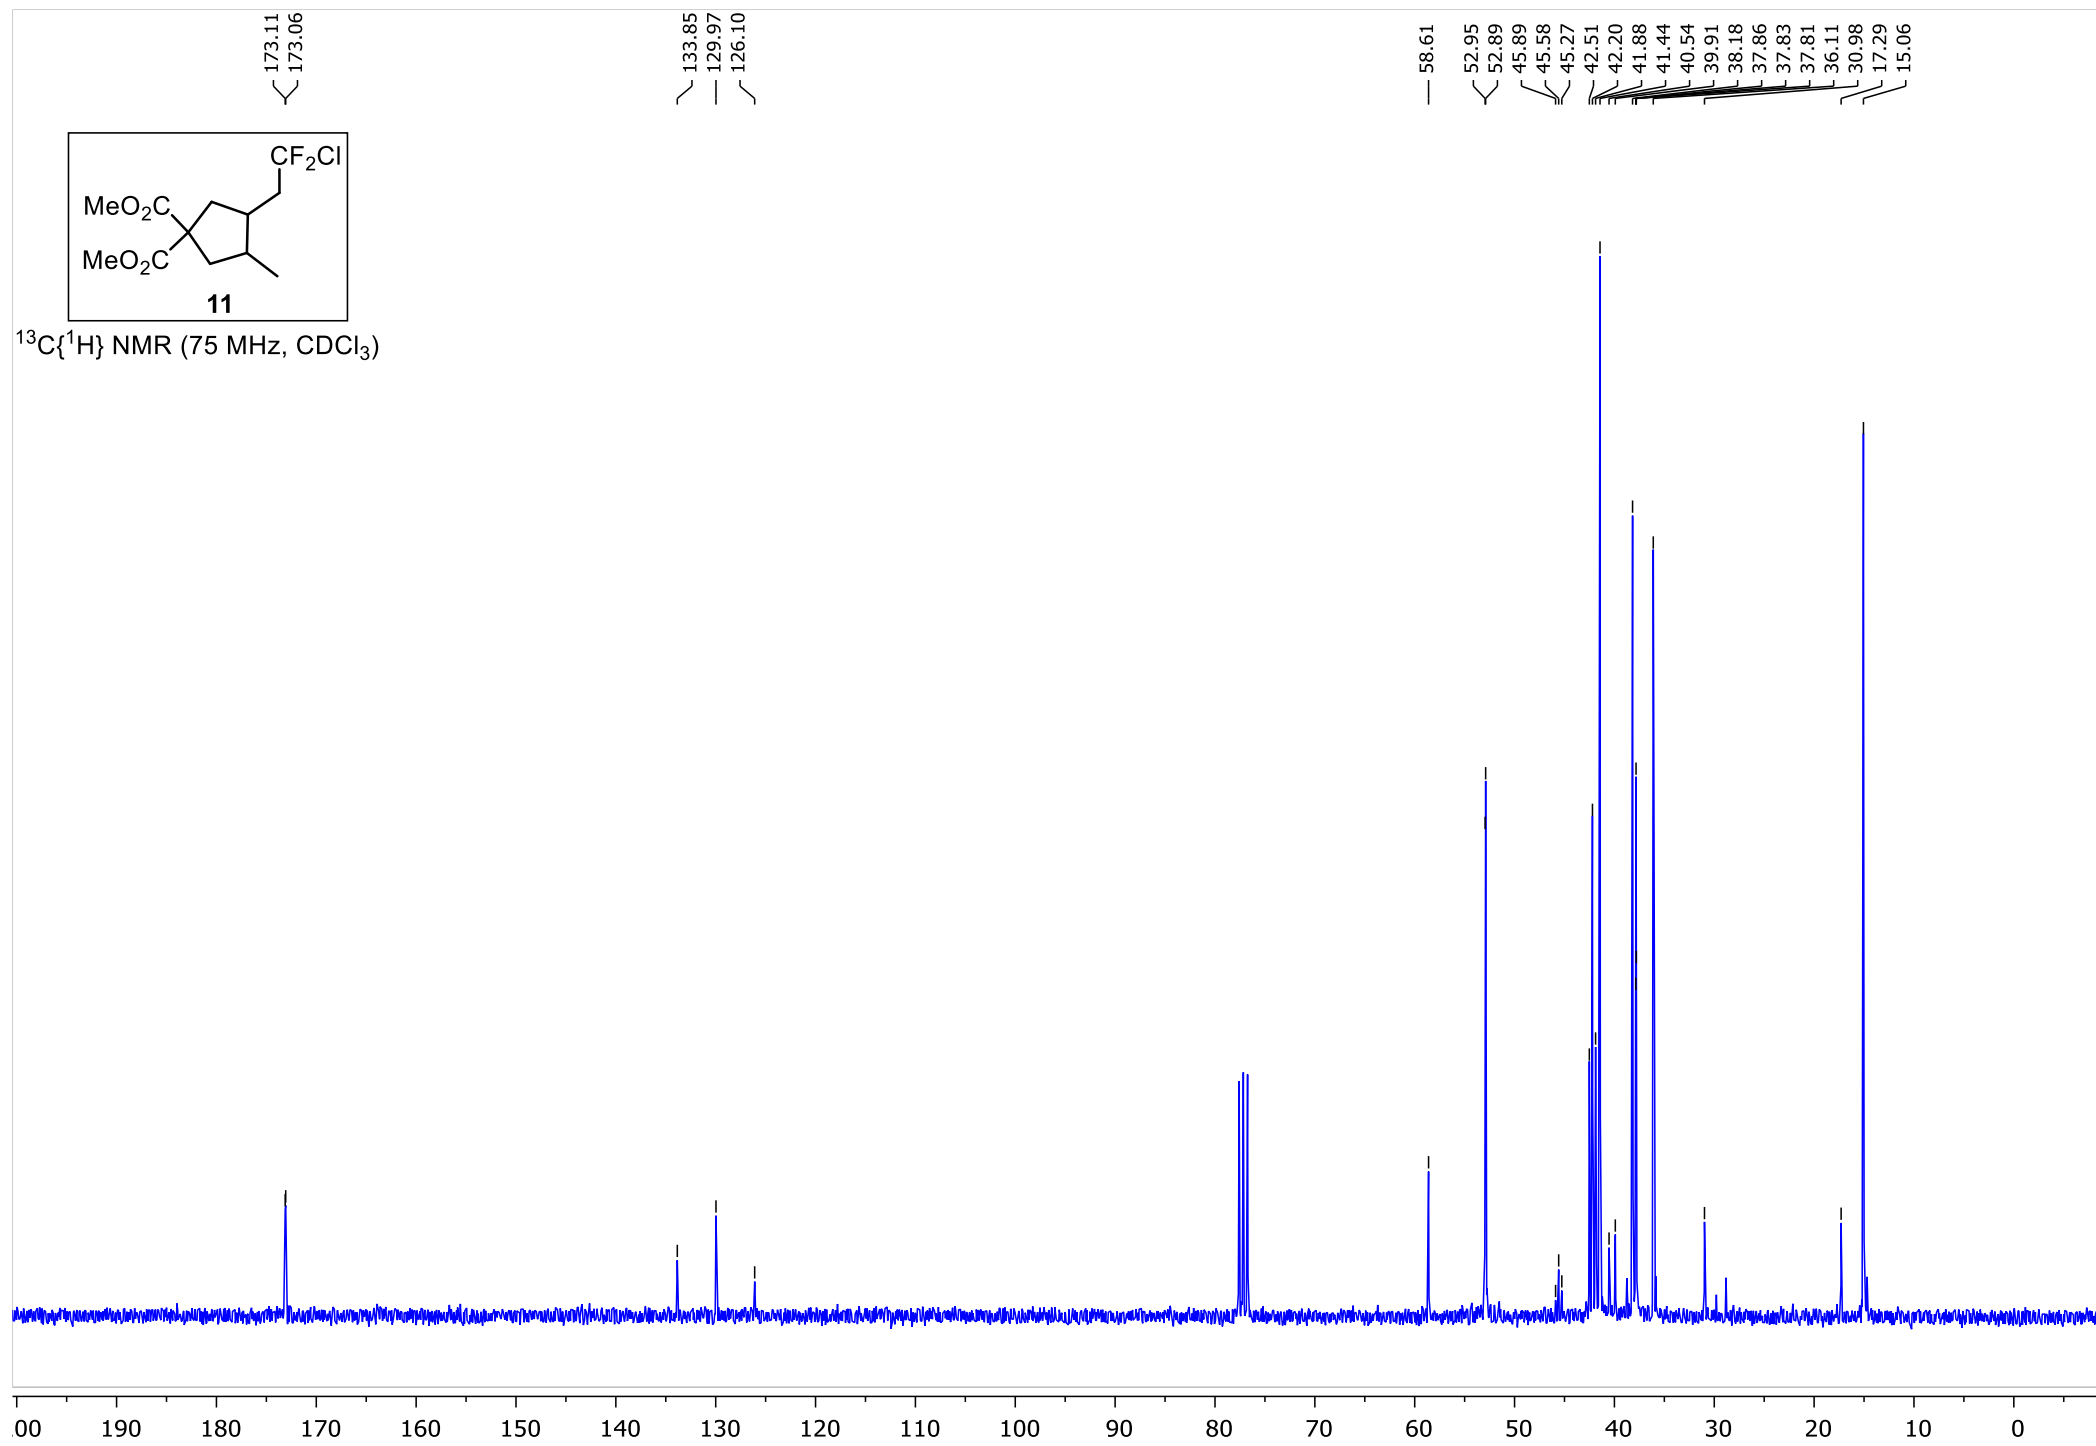

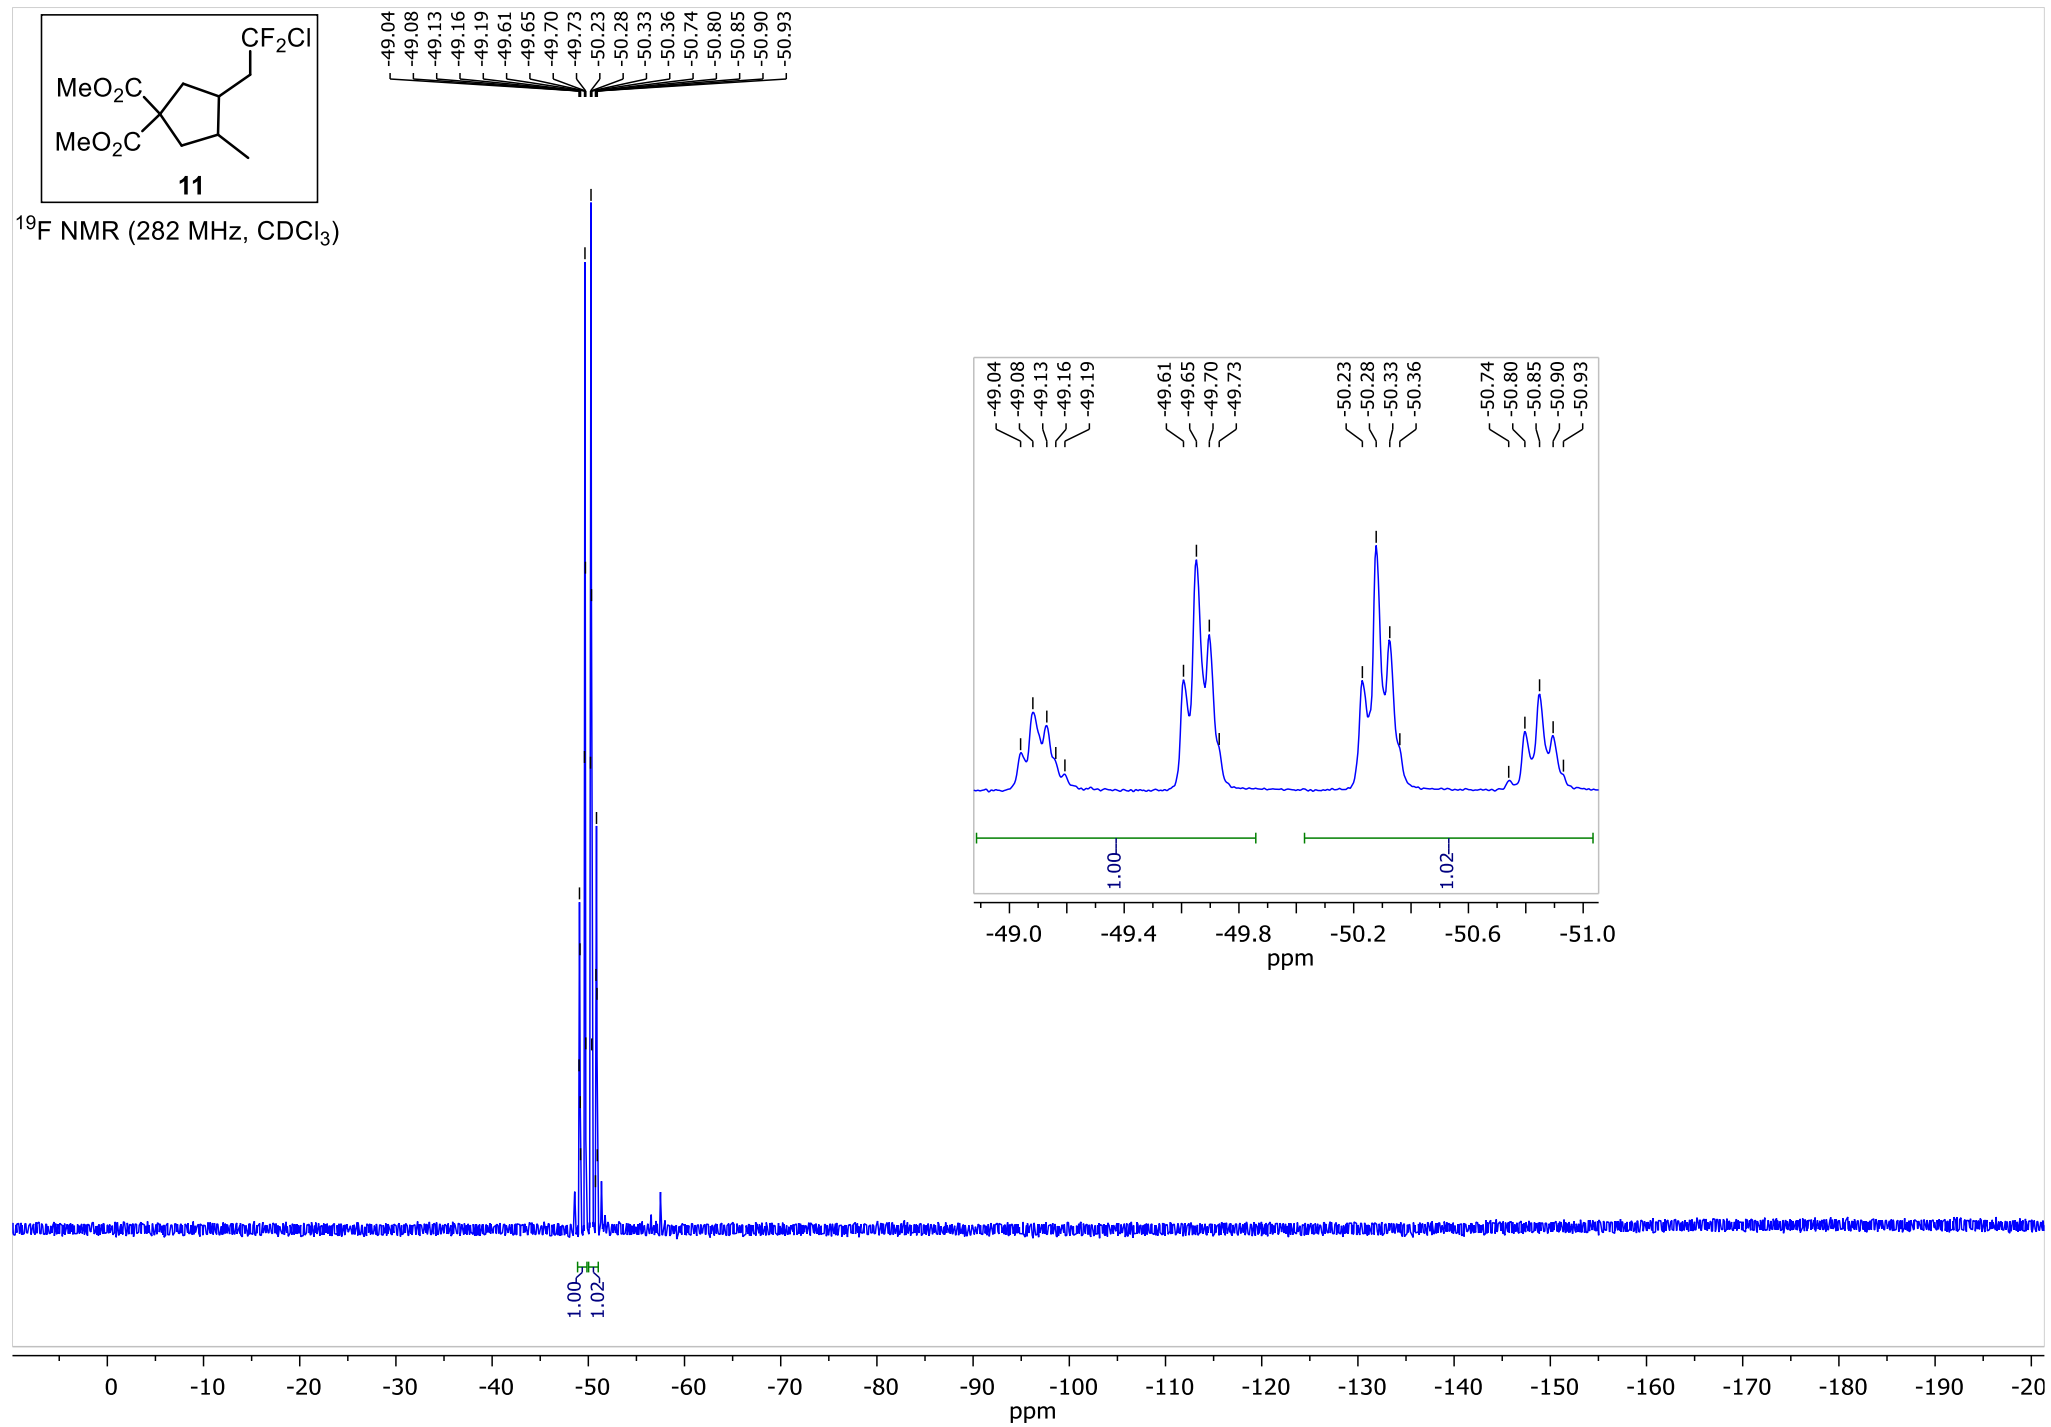

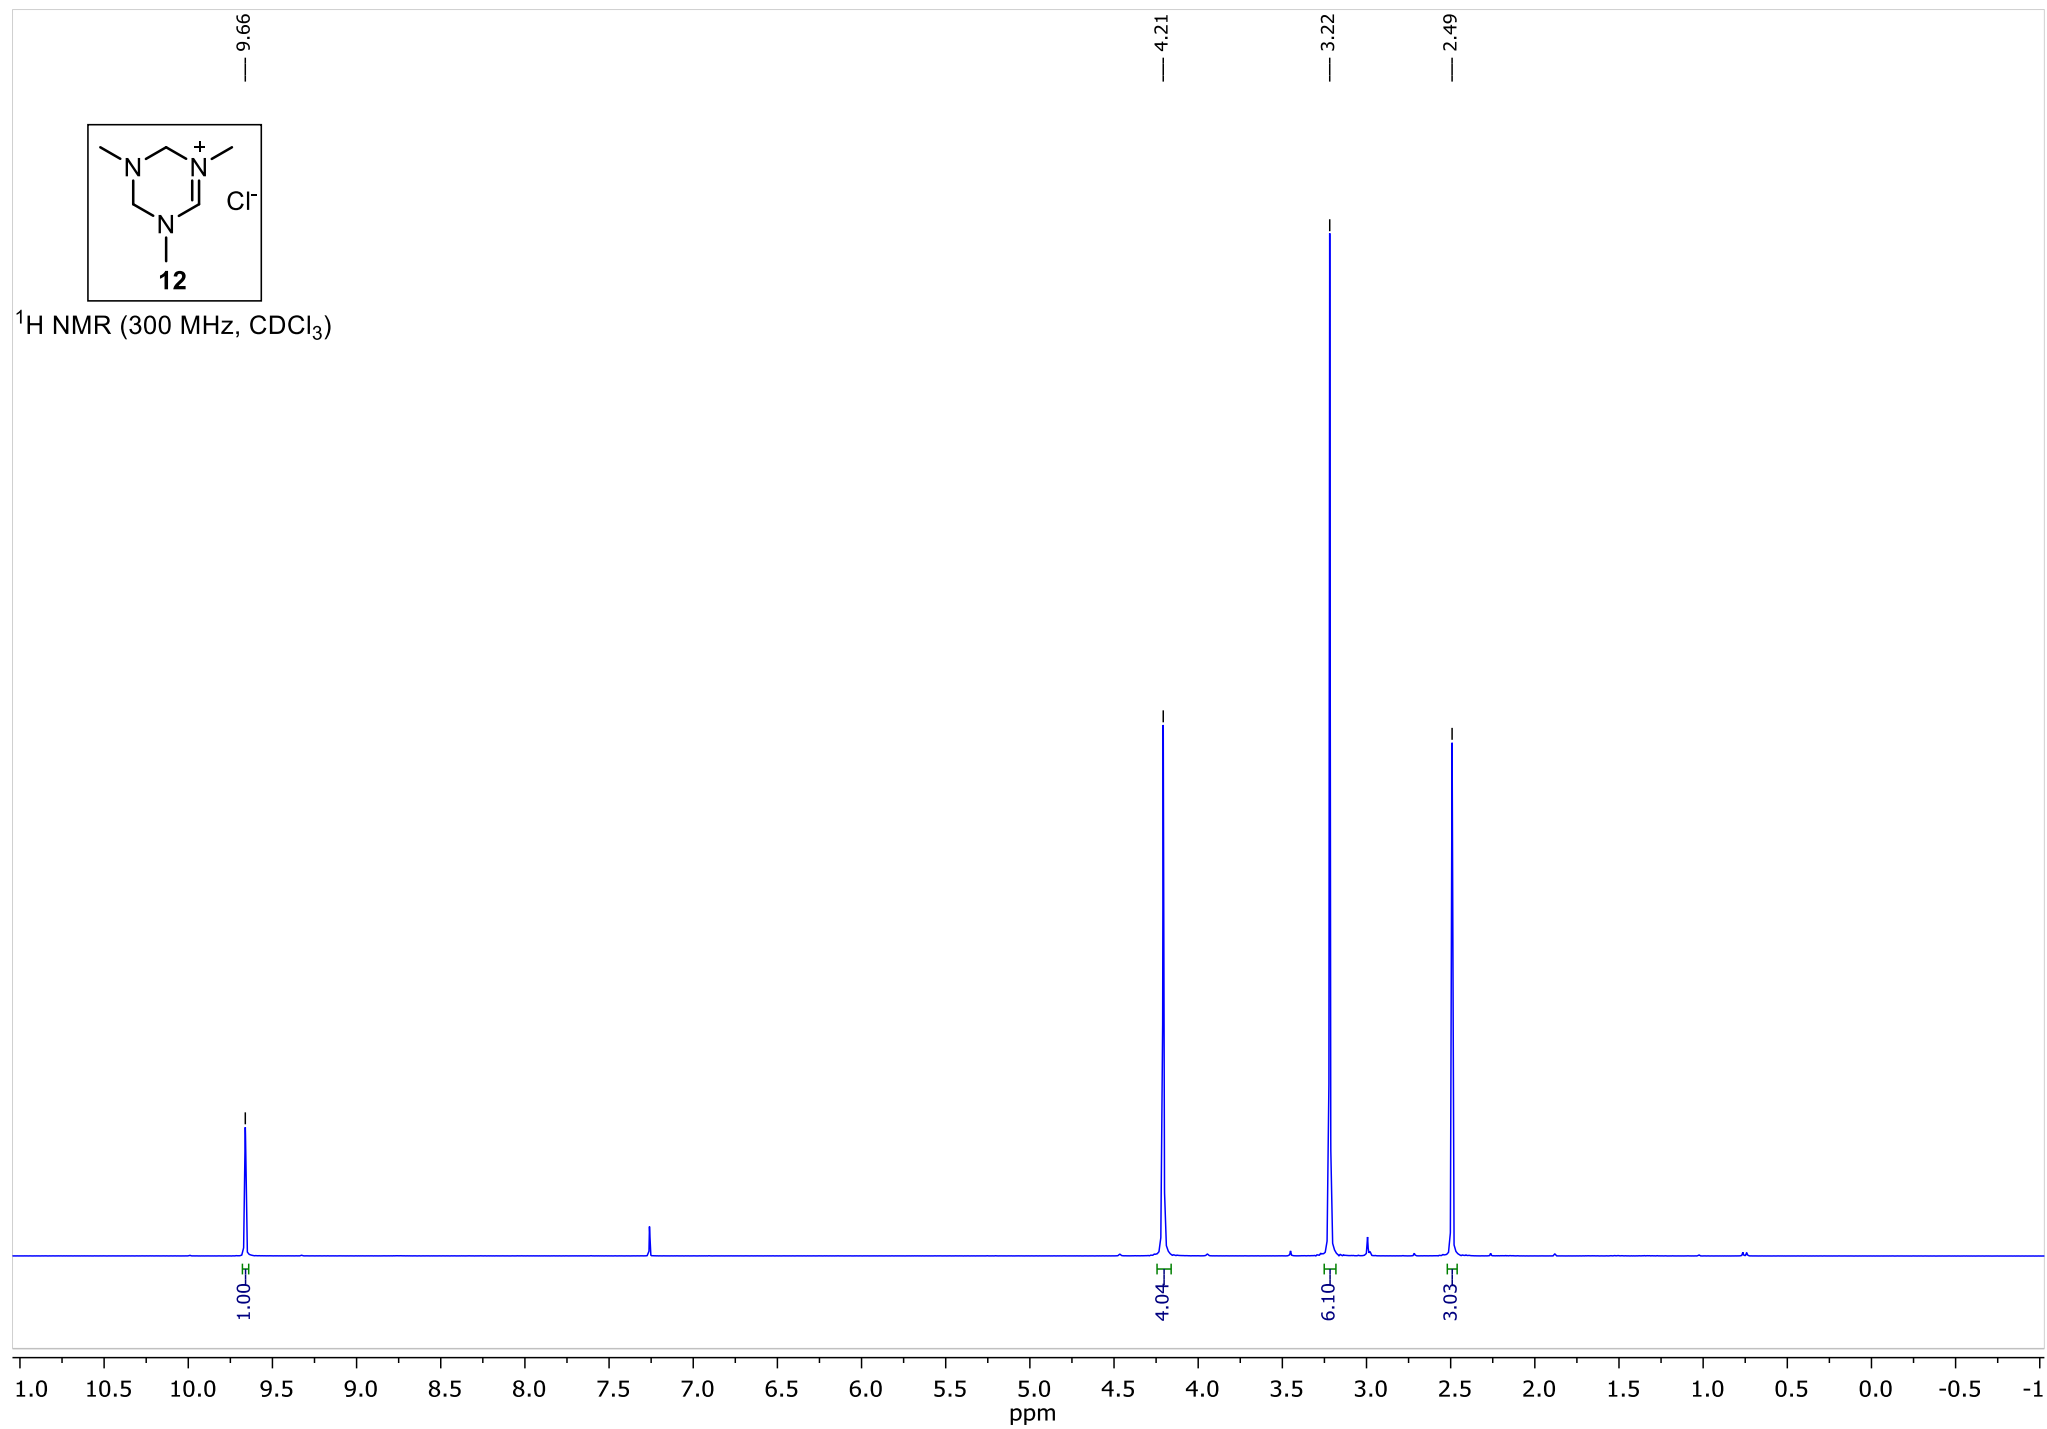



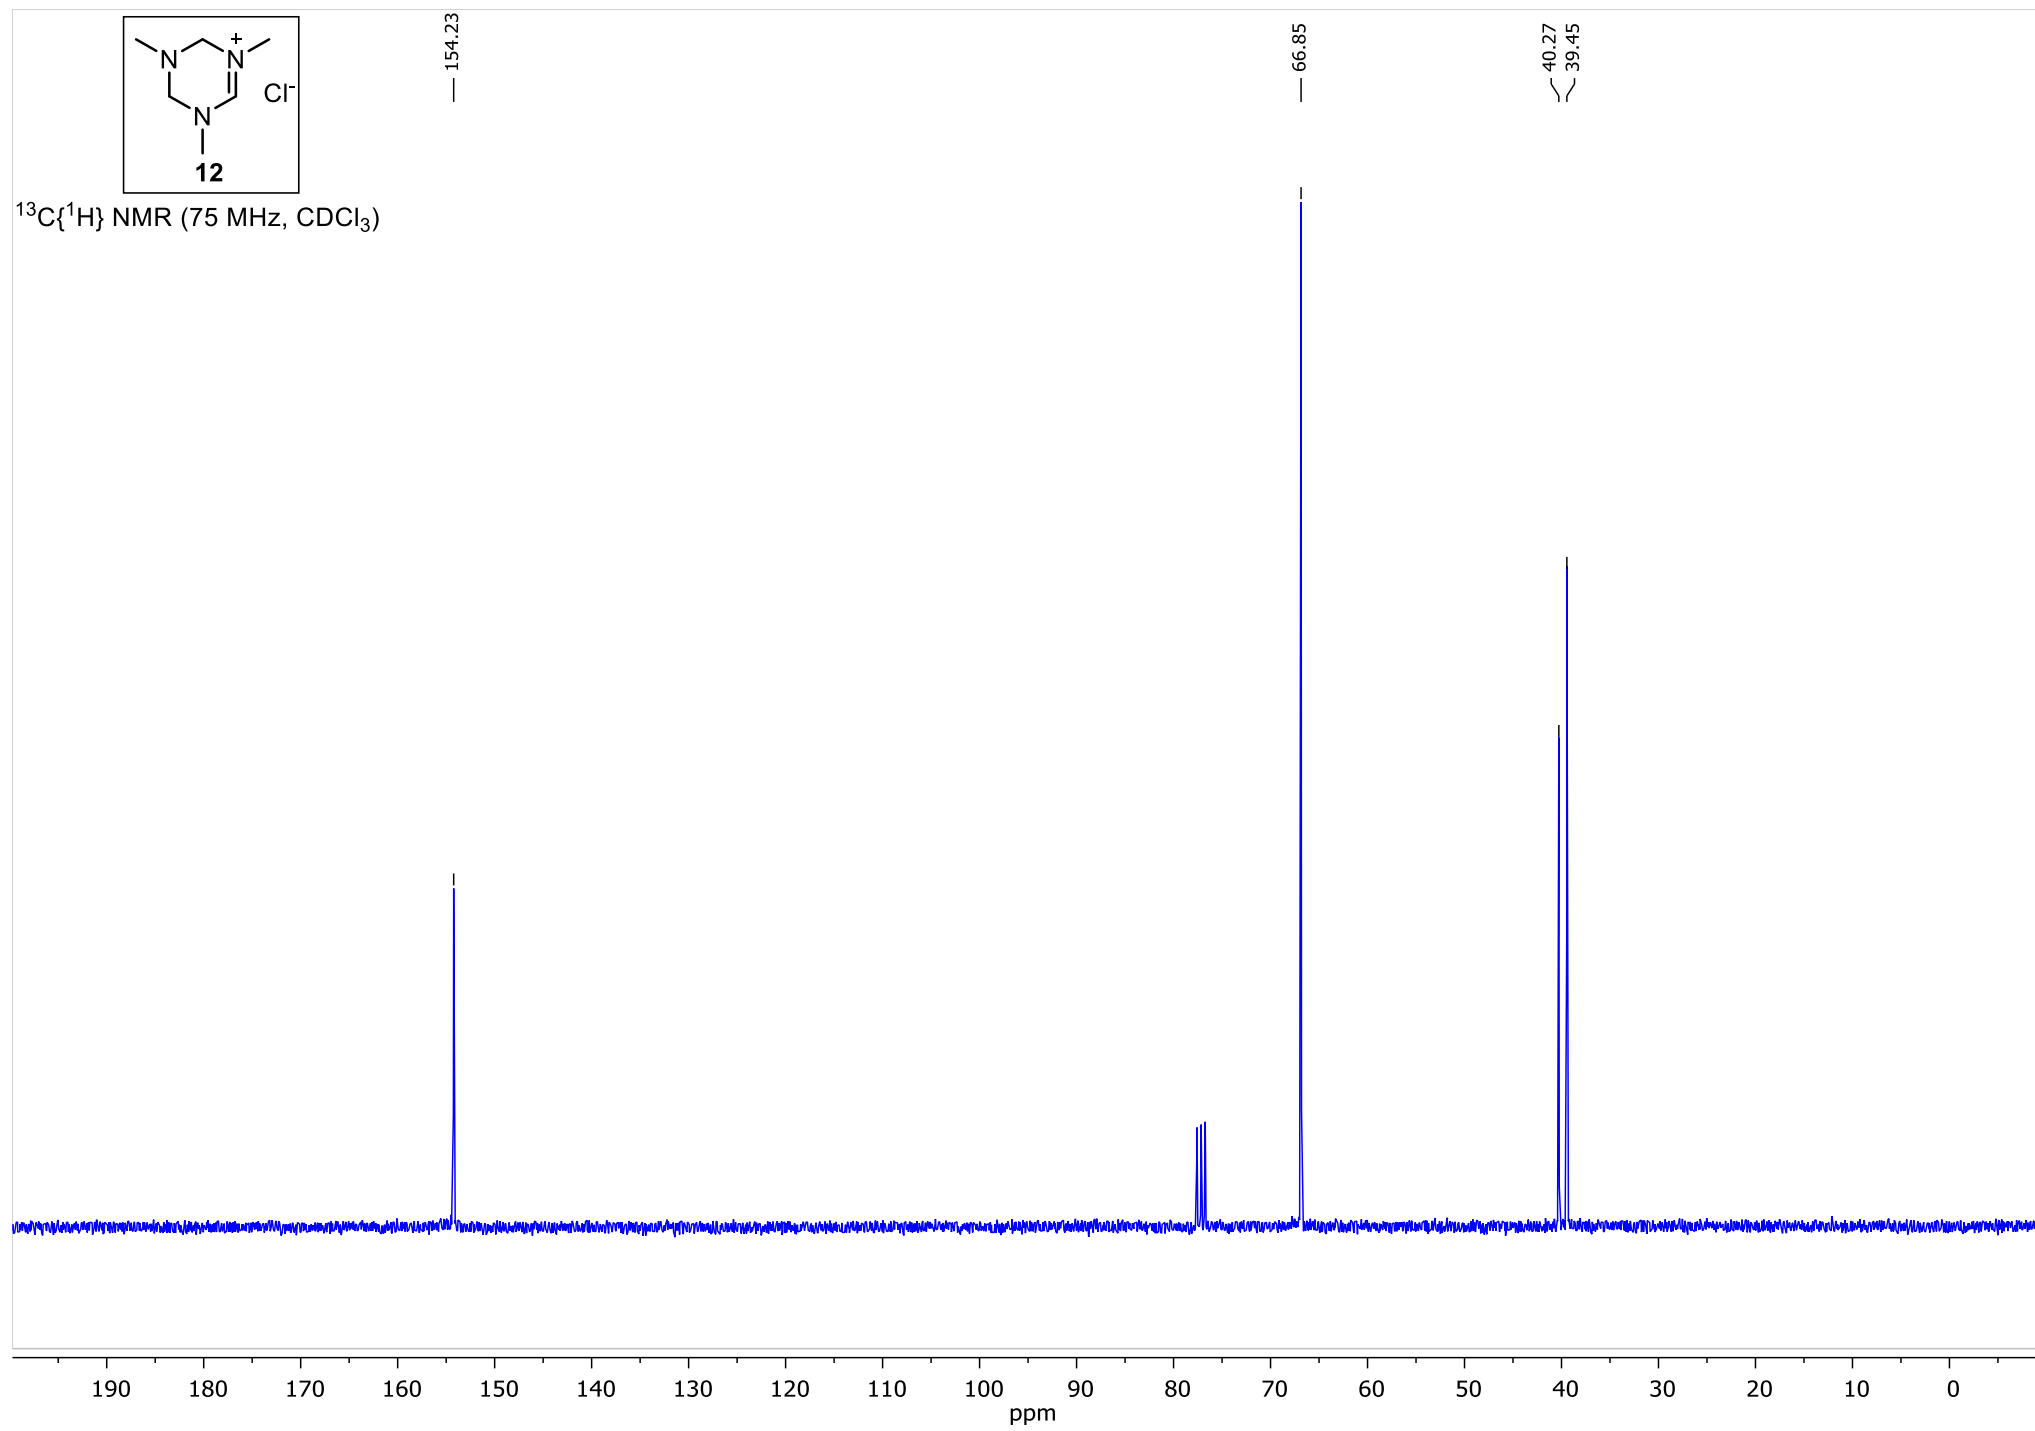

Crude product from the reaction of tetramethylethylene  
with ethyl 4-chloro-2,2,3,3-tetrafluoropropionate  
performed according to General procedure B.

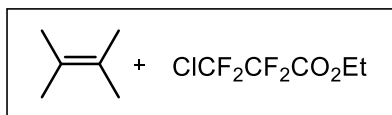

$^1\text{H}$  NMR (300 MHz,  $\text{CDCl}_3$ )

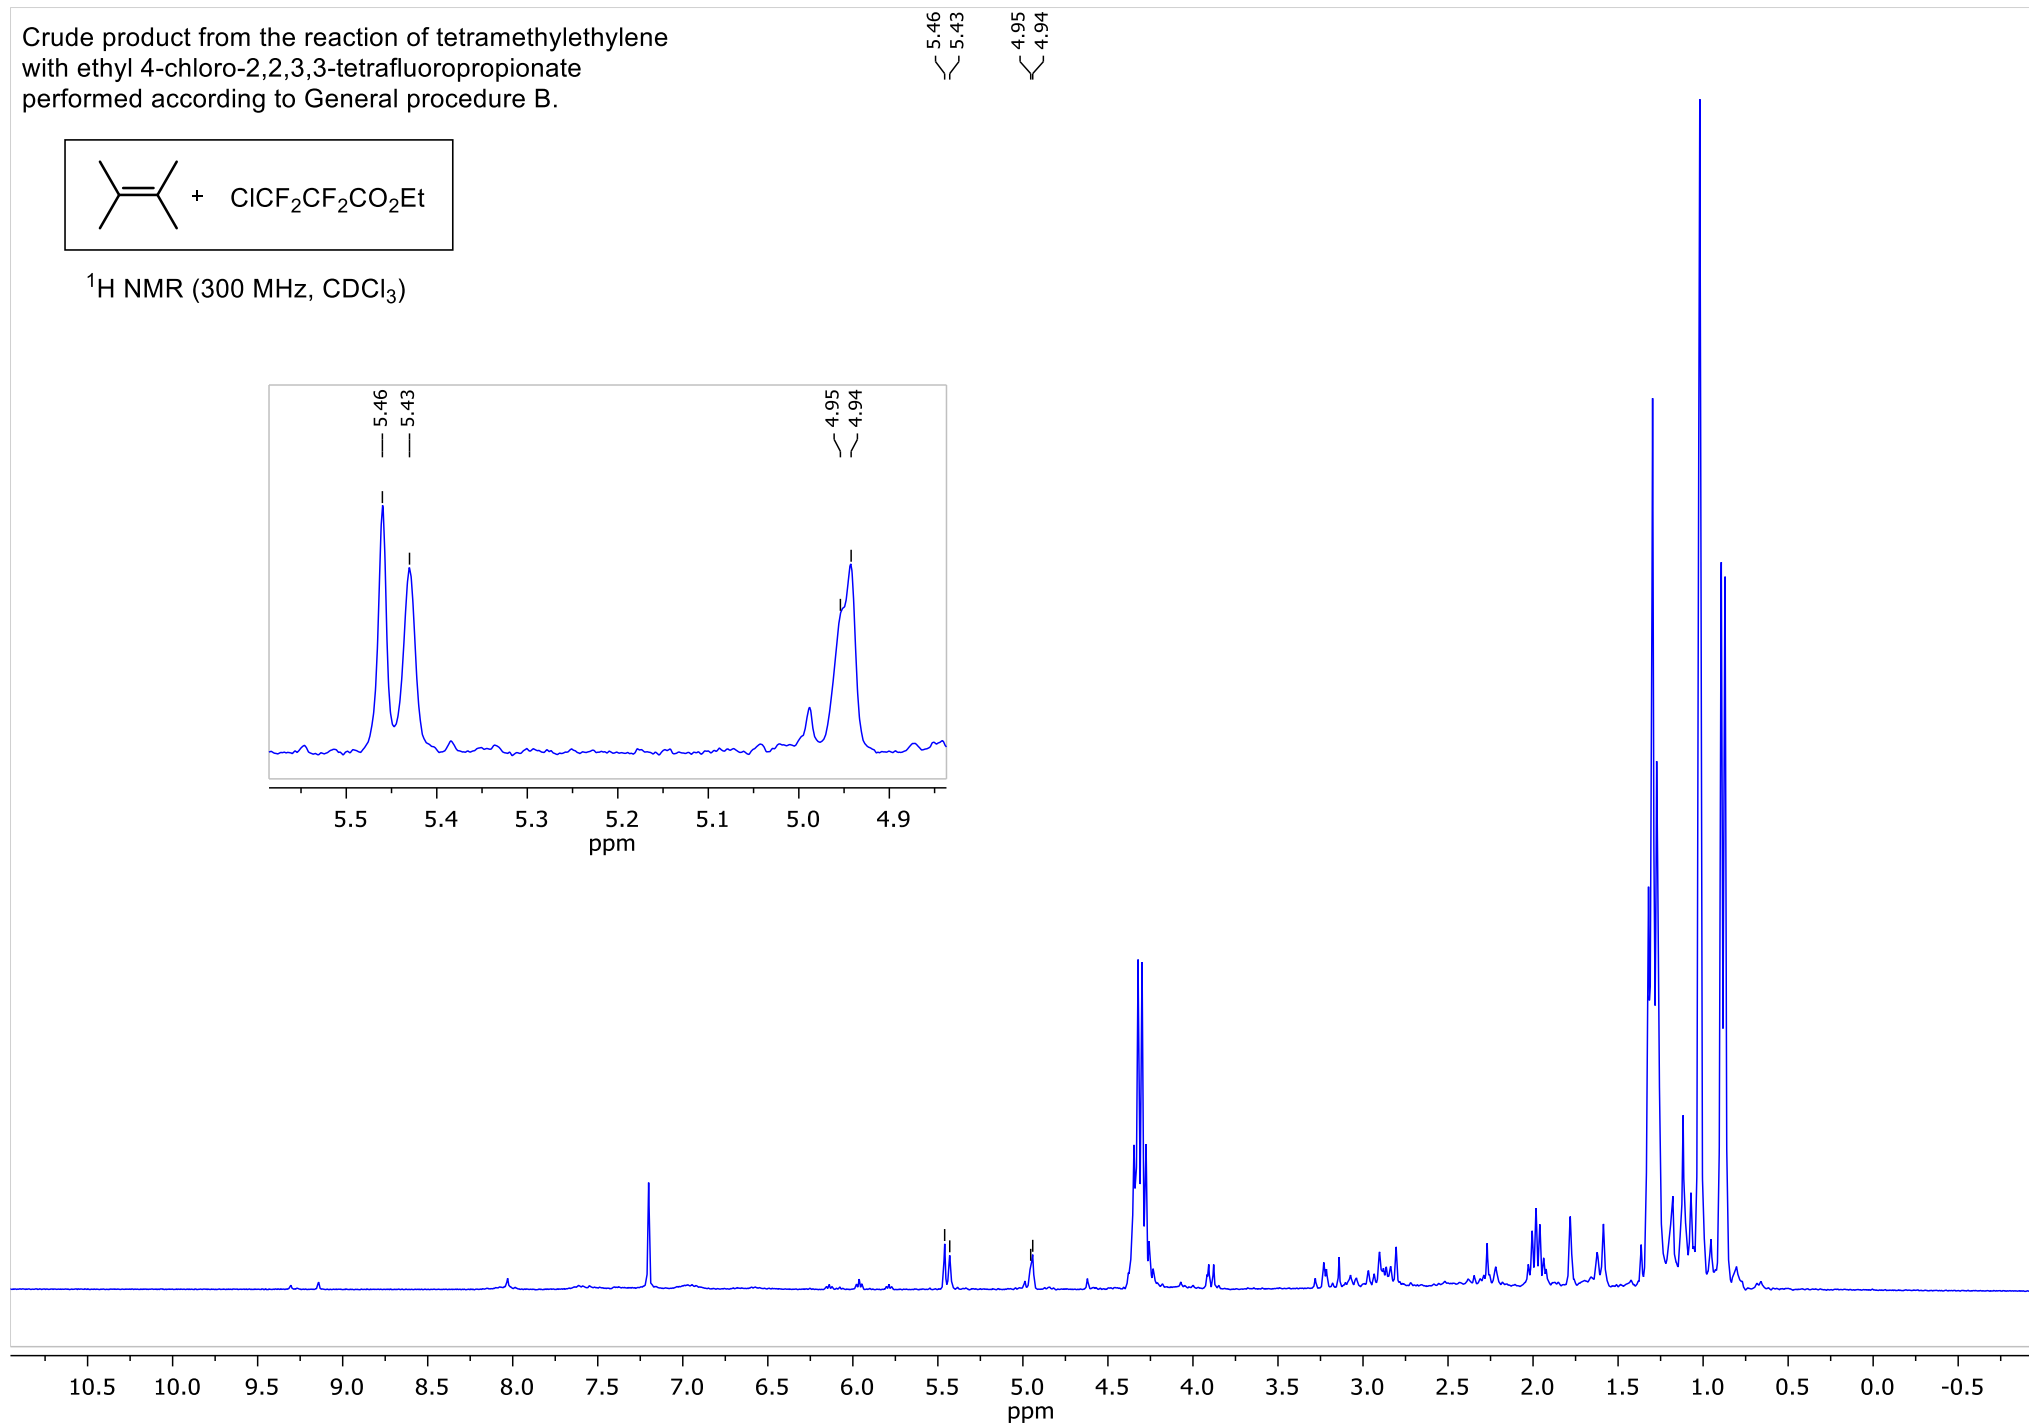

Supplement: SC-014-D3SC00027C-s001.pdf [file SC-014-D3SC00027C-s001.pdf]
